# Supplementary material for: Rewiring of liver diurnal transcriptome rhythms by triiodothyronine (T3) supplementation
Source: eLife. 2022 Jul 27;11:e79405. doi: 10.7554/eLife.79405 (PMC9391036; doi:10.7554/eLife.79405)
Supplement: Supplementary file 1. [file elife-79405-supp1.xlsx]

## Sheet: Summary
Supplementary Table S1. Metabolic output rhythmic evaluation by JTK cycle
Sheet 1 - JTK cycle analyses for TH levels
Sheet 2 - JTK cycle analyses for activity and temperature
Sheet 3 - JTK cycle analyses for RQ and VO2 levels

## Sheet: Sheet 1
JTK with a fixed period of 24h
CycID	JTK_pvalue	JTK_BH.Q	JTK_period	JTK_adjphase	JTK_amplitude
T3_CON	0.0122544	0.0490178	24	0	0.253144
T3_T3	0.319164	0.638328	24	22	0.522552
T4_CON	0.683082	0.910775	24	10	0.335522
T4_T3	1	1	24	12	0.168999
JTK with a period range from 8 to 16h
CycID	BH.Q	ADJ.P	PER	LAG	AMP
T3_CON	0.338925	0.169463	16	0	0.271529
T3_T3	0.0458718	0.011468	12	2	0.923658
T4_CON	0.342823	0.257117	8	2	0.333047
T3_T4	1	1	8	4	0.218496

## Sheet: Sheet 2
CycID	JTK_pvalue	JTK_BH.Q	JTK_period	JTK_adjphase	JTK_amplitude
Act_CON	2.45518e-13	3.27357e-13	24	17.5	765.797
Act_T3	8.60352e-17	3.44141e-16	24	17.5	464.039
Temp_CON	1.08944e-13	2.17888e-13	24	18	0.848528
Temp_T3	2.10656e-05	2.10656e-05	24	19	0.268701

## Sheet: Sheet 3
CycID	JTK_pvalue	JTK_BH.Q	JTK_period	JTK_adjphase	JTK_amplitude
RQ_CON	5.91127e-23	2.36451e-22	24	18	0.0636396
RQ_T3	1.81971e-22	3.63942e-22	24	20	0.0919239
VO2_CON	5.8733e-09	5.8733e-09	24	18	11.4339
VO2_T3	3.42444e-18	4.56592e-18	24	19	25.8094
