# Supplementary material for: Rewiring of liver diurnal transcriptome rhythms by triiodothyronine (T3) supplementation
Source: eLife. 2022 Jul 27;11:e79405. doi: 10.7554/eLife.79405 (PMC9391036; doi:10.7554/eLife.79405)
Supplement: Supplementary file 2. [file elife-79405-supp2.xlsx]

## Sheet: Summary
Supplementary Table S2. Metabolic output correlation
Sheet 1 - Correlation analyses between all metabolic parameters and thyroid hormones

## Sheet: Sheet 1
Across-time correlation
	T3 vs. Activity	T3 vs. Btemp	T3 vs. VO2
Spearman r
r	0.2045	-0.00673	0.2174
95% confidence interval	-0.09310 to 0.4686	-0.2982 to 0.2859	-0.07968 to 0.4791
P (two-tailed)	0.1632	0.9638	0.1377
	T4 vs. Activity	T4 vs. Btemp	T4 vs. VO2
Spearman r
r	-0.054	-0.1031	-0.09263
95% confidence interval	-0.3437 to 0.2451	-0.3865 to 0.1980	-0.3775 to 0.2082
P (two-tailed)	0.7185	0.4902	0.5358
