# Supplementary material for: Rewiring of liver diurnal transcriptome rhythms by triiodothyronine (T3) supplementation
Source: eLife. 2022 Jul 27;11:e79405. doi: 10.7554/eLife.79405 (PMC9391036; doi:10.7554/eLife.79405)
Supplement: Supplementary file 3. [file elife-79405-supp3.xlsx]

## Sheet: Summary
Supplementary Table S3. Global Differentially Expressed Genes (DEGs)
Sheet 1 - Fold change analyses considering all ZTs (Global Analyses)
Sheet 2 - Differentially expressed genes (DEGs) by considering all ZTs (Global Analyses)
Sheet 3 - Gene set enrichment analyses (GSEA) of upregulated (UP) DEGs compared to CON
Sheet 4 - Gene set enrichment analyses (GSEA) of down (DOWN) DEGs compared to CON

## Sheet: Sheet 1
ID	Gene.Symbol	Fold Change	p value (FDR)	p value	Significance	Status
TC1300001377.mm.2	Akr1c18	11.6336	9.03892e-43	2.03524e-46	TRUE	UP
TC0500003596.mm.2	Cyp3a16	11.0167	3.89648e-28	4.21127e-31	TRUE	UP
TC1900001057.mm.2	Slc22a27	8.15721	1.49722e-27	1.88788e-30	TRUE	UP
TC1900000317.mm.2	Rfk	1.97743	9.01193e-27	1.17692e-29	TRUE	UP
TC0900001128.mm.2	Nt5e	4.64089	1.57278e-26	2.19563e-29	TRUE	UP
TC1900000467.mm.2	Papss2	3.10862	5.32997e-26	8.1608e-29	TRUE	UP
TC0900001726.mm.2	Cep126	7.23076	8.23002e-26	1.29718e-28	TRUE	UP
TC1800001175.mm.2	Slc23a1	2.52678	1.00374e-25	1.62725e-28	TRUE	UP
TC0500002694.mm.2	Ugt2b37	5.03973	3.95848e-25	6.95221e-28	TRUE	UP
TC1000002383.mm.2	Gstt1	2.8387	2.11402e-23	4.85521e-26	TRUE	UP
TC1900001612.mm.2	Cyp17a1	10.4449	1.1291e-22	2.89825e-25	TRUE	UP
TC1000001701.mm.2	Ginm1	2.00654	5.46927e-22	1.47778e-24	TRUE	UP
TC1700002175.mm.2	Slc22a7	6.80487	5.8346e-22	1.60277e-24	TRUE	UP
TC0400003219.mm.2	Dio1	3.8673	6.74083e-22	1.88207e-24	TRUE	UP
TC0900001900.mm.2	Acp5	1.7375	7.33018e-22	2.07962e-24	TRUE	UP
TC0700000446.mm.2	Cyp2a12	1.47495	8.54355e-22	2.46234e-24	TRUE	UP
TC0800001202.mm.2	Ces4a	6.69201	3.67159e-21	1.22353e-23	TRUE	UP
TC0900000659.mm.2	Idh3a	2.52547	3.79008e-21	1.28009e-23	TRUE	UP
TC0300001446.mm.2	Gbp3	4.91295	3.87725e-21	1.36191e-23	TRUE	UP
TC1700000836.mm.2	Cyp39a1	3.04024	4.31037e-21	1.55287e-23	TRUE	UP
TC0800003091.mm.2	Sult5a1	4.01649	5.71473e-21	2.08454e-23	TRUE	UP
TC0900000560.mm.2	Apoa4	3.84487	6.71042e-21	2.47795e-23	TRUE	UP
TC0500000547.mm.2	Stim2	2.93205	1.30658e-20	4.94249e-23	TRUE	UP
TC1600001639.mm.2	Gramd1c	1.90868	1.40048e-20	5.36074e-23	TRUE	UP
TC0600000362.mm.2	Trim24	3.82788	1.58132e-20	6.12417e-23	TRUE	UP
TC0500003532.mm.2	Mmd2	6.1717	2.94157e-20	1.15246e-22	TRUE	UP
TC1700000335.mm.2	Abca3	2.5837	3.16861e-20	1.29849e-22	TRUE	UP
TC1000003226.mm.2	Gstt3	4.11172	6.51264e-20	2.84485e-22	TRUE	UP
TC1500001736.mm.2	9030619P08Rik	8.11085	7.53019e-20	3.32324e-22	TRUE	UP
TC0500001894.mm.2	Cyp51	2.58813	8.3692e-20	3.7312e-22	TRUE	UP
TC0200005184.mm.2	Ptgis	1.88667	1.26477e-19	5.69561e-22	TRUE	UP
TC0100000847.mm.2	Spp2	2.16293	1.4434e-19	6.56505e-22	TRUE	UP
TC0900001232.mm.2	Rbp1	2.99348	1.94008e-19	9.17358e-22	TRUE	UP
TC0400000961.mm.2	Fggy	1.10348	2.07982e-19	9.928e-22	TRUE	UP
TC1700000470.mm.2	Anks1	2.58245	3.19935e-19	1.58185e-21	TRUE	UP
TC1100003399.mm.2	Ccl6	2.92654	3.19935e-19	1.58484e-21	TRUE	UP
TC0200000868.mm.2	Gpd2	2.37786	8.60045e-19	4.41526e-21	TRUE	UP
TC0400002216.mm.2	Pdp1	2.99033	1.38958e-18	7.5092e-21	TRUE	UP
TC0900002780.mm.2	Me1	2.60524	1.84353e-18	1.0118e-20	TRUE	UP
TC0600003329.mm.2	Plbd1	1.66053	2.4352e-18	1.34887e-20	TRUE	UP
TC1900000090.mm.2	Slc25a45	2.54475	3.29772e-18	1.87117e-20	TRUE	UP
TC1900000987.mm.2	Frmd8	2.27717	3.30715e-18	1.90492e-20	TRUE	UP
TC1500001728.mm.2	Ly6a	4.41154	3.30715e-18	1.90631e-20	TRUE	UP
TC0600001371.mm.2	Slc6a12	2.16005	4.29137e-18	2.51229e-20	TRUE	UP
TC1900001767.mm.2	Slc22a29	3.24303	5.55842e-18	3.30412e-20	TRUE	UP
TC1700002791.mm.2	H2-Q1	2.16469	6.16868e-18	3.69465e-20	TRUE	UP
TC0X00000668.mm.2	Nsdhl	2.46442	6.337e-18	3.824e-20	TRUE	UP
TC0400001229.mm.2	Cyp4a31	4.21174	7.33816e-18	4.49423e-20	TRUE	UP
TC1500001450.mm.2	Angpt1	2.85808	7.36846e-18	4.54597e-20	TRUE	UP
TC0100003505.mm.2	Hsd17b7	2.41163	1.13263e-17	7.0388e-20	TRUE	UP
TC0300001641.mm.2	Fabp12	3.09967	1.42554e-17	8.98745e-20	TRUE	UP
TC1100004270.mm.2	Tlcd2	2.72312	1.44173e-17	9.15448e-20	TRUE	UP
TC0200005123.mm.2	Wfdc16	3.15478	1.63401e-17	1.05225e-19	TRUE	UP
TC1300002083.mm.2	Lect2	1.31812	1.68876e-17	1.09512e-19	TRUE	UP
TC1100001149.mm.2	Rab34	2.09154	1.82305e-17	1.21504e-19	TRUE	UP
TC0800002665.mm.2	Sall1	2.04895	2.60114e-17	1.79219e-19	TRUE	UP
TC1700002573.mm.2	Atl2	1.4535	3.12031e-17	2.16865e-19	TRUE	UP
TC1200002506.mm.2	Dnah11	5.42899	3.47856e-17	2.44373e-19	TRUE	UP
TC0400000377.mm.2	Dnaic1	3.92986	3.51119e-17	2.48247e-19	TRUE	UP
TC1000000030.mm.2	Esr1	2.41094	4.73783e-17	3.4564e-19	TRUE	UP
TC1900000455.mm.2	Mbl2	1.34737	4.74049e-17	3.47969e-19	TRUE	UP
TC0700001258.mm.2	Ctsc	2.30188	5.79886e-17	4.28269e-19	TRUE	UP
TC1000002814.mm.2	Acss3	2.27848	6.47682e-17	4.81255e-19	TRUE	UP
TC1900001123.mm.2	AW112010	1.83998	9.01352e-17	6.90038e-19	TRUE	UP
TC0200003630.mm.2	Ifih1	2.23551	9.38562e-17	7.2531e-19	TRUE	UP
TC1700001194.mm.2	Qpct	2.02451	9.38562e-17	7.26977e-19	TRUE	UP
TC0700001409.mm.2	Ucp2	3.33775	1.27761e-16	1.01836e-18	TRUE	UP
TC0500002219.mm.2	Letm1	1.27371	1.55359e-16	1.25933e-18	TRUE	UP
TC0800001396.mm.2	Bco1	1.88167	2.20726e-16	1.819e-18	TRUE	UP
TC0X00001024.mm.2	Chic1	3.15645	2.73595e-16	2.29613e-18	TRUE	UP
TC0900001195.mm.2	Paqr9	1.60645	3.01378e-16	2.55152e-18	TRUE	UP
TC0X00000122.mm.2	Sytl5	3.26884	3.06143e-16	2.61943e-18	TRUE	UP
TC1400001487.mm.2	Rarb	2.7058	4.36866e-16	3.81663e-18	TRUE	UP
TC0700002655.mm.2	Cyp2a22	4.66114	4.82461e-16	4.25841e-18	TRUE	UP
TC0500003599.mm.2	Cyp3a44	4.07332	5.31522e-16	4.71539e-18	TRUE	UP
TC1300000045.mm.2	Idi1	2.89795	6.1067e-16	5.44504e-18	TRUE	UP
TC1600000489.mm.2	Hacd2	1.19469	6.91371e-16	6.19575e-18	TRUE	UP
TC0100002576.mm.2	Tns1	1.3763	7.0581e-16	6.38871e-18	TRUE	UP
TC1400002054.mm.2	Slc7a7	1.59507	7.07854e-16	6.43909e-18	TRUE	UP
TC1400001906.mm.2	Ddhd1; Mir5131	2.6404	1.2865e-15	1.19346e-17	TRUE	UP
TC0100002772.mm.2	A730008H23Rik; Hjurp; 6430706D22Rik	2.20656	1.5224e-15	1.45343e-17	TRUE	UP
TC0500002699.mm.2	Sult1d1	2.29402	2.41809e-15	2.37388e-17	TRUE	UP
TC0700003845.mm.2	Folr2	2.82002	2.50868e-15	2.47411e-17	TRUE	UP
TC0900001200.mm.2	Pcolce2	2.20351	2.61077e-15	2.59831e-17	TRUE	UP
TC0800002313.mm.2	Msmo1	2.2244	3.00494e-15	3.00413e-17	TRUE	UP
TC0500003745.mm.2	Cyp3a41a	7.68433	4.09906e-15	4.15333e-17	TRUE	UP
TC0100003124.mm.2	Rnpep	1.29062	5.95901e-15	6.15694e-17	TRUE	UP
TC1300001353.mm.2	Hmgcs1	2.78571	6.05247e-15	6.29614e-17	TRUE	UP
TC0500002755.mm.2	Cxcl9	2.51759	6.7366e-15	7.06849e-17	TRUE	UP
TC0700002102.mm.2	Dhcr7	2.21553	6.79357e-15	7.15886e-17	TRUE	UP
TC0400002079.mm.2	Nadk	1.2956	6.88666e-15	7.28796e-17	TRUE	UP
TC0900002510.mm.2	Slc51b	2.70321	7.17551e-15	7.62595e-17	TRUE	UP
TC0400001107.mm.2	Dhcr24	1.38089	7.29849e-15	7.78952e-17	TRUE	UP
TC0500002651.mm.2	Igfbp7	1.23022	7.29853e-15	7.82244e-17	TRUE	UP
TC1500000045.mm.2	Lifr	1.55882	7.3524e-15	7.91328e-17	TRUE	UP
TC1500001606.mm.2	Fam84b	1.8731	8.97618e-15	9.70136e-17	TRUE	UP
TC1200002434.mm.2	Akt1	1.55389	1.12562e-14	1.25204e-16	TRUE	UP
TC0X00003360.mm.2	Tlr7	2.69618	1.33354e-14	1.50133e-16	TRUE	UP
TC1900000709.mm.2	As3mt	1.51525	1.51787e-14	1.72936e-16	TRUE	UP
TC1300000718.mm.2	Ntrk2	3.67449	1.54912e-14	1.77193e-16	TRUE	UP
TC0400003675.mm.2	Atpif1	1.34525	1.60129e-14	1.85324e-16	TRUE	UP
TC0400001555.mm.2	Sdc3	2.46618	1.6639e-14	1.9332e-16	TRUE	UP
TC0700004291.mm.2	Sult1a1	1.70611	1.68392e-14	1.96404e-16	TRUE	UP
TC0800001127.mm.2	Adgrg3	1.92226	1.70078e-14	1.99137e-16	TRUE	UP
TC0100000372.mm.2	Sdpr	2.01868	1.85117e-14	2.18413e-16	TRUE	UP
TC0400003794.mm.2	C1qa	1.91777	2.14519e-14	2.55035e-16	TRUE	UP
TC0200004651.mm.2	Rnf24	2.1977	2.19174e-14	2.61555e-16	TRUE	UP
TC0600002578.mm.2	Clec4f	2.71775	2.2179e-14	2.65676e-16	TRUE	UP
TC0700004530.mm.2	Irf7	3.1638	2.51481e-14	3.06259e-16	TRUE	UP
TC0100002544.mm.2	Fn1	1.0162	2.51481e-14	3.06906e-16	TRUE	UP
TC1400002215.mm.2	Fdft1	2.16324	2.58503e-14	3.17802e-16	TRUE	UP
TC1400000292.mm.2	Lrtm1	3.25013	2.74402e-14	3.39821e-16	TRUE	UP
TC0X00001934.mm.2	Cfp	2.21851	2.85997e-14	3.55468e-16	TRUE	UP
TC0100001634.mm.2	Pydc3	2.18797	2.87795e-14	3.58999e-16	TRUE	UP
TC0100001365.mm.2	Colgalt2	2.6744	2.95262e-14	3.69642e-16	TRUE	UP
TC0200000013.mm.2	Fam107b	1.71284	3.37169e-14	4.26661e-16	TRUE	UP
TC0200005317.mm.2	Slmo2	1.7167	4.08029e-14	5.2368e-16	TRUE	UP
TC1100003300.mm.2	Tmem97	1.49647	4.8661e-14	6.33299e-16	TRUE	UP
TC1100002643.mm.2	Gm12185; Tgtp1	2.9644	6.9319e-14	9.17761e-16	TRUE	UP
TC0700003850.mm.2	Il18bp	1.79422	8.85511e-14	1.18036e-15	TRUE	UP
TC0100000766.mm.2	Sp100	1.55815	9.055e-14	1.21108e-15	TRUE	UP
TC1200001981.mm.2	Rdh11	2.31183	9.16437e-14	1.22984e-15	TRUE	UP
TC1900001482.mm.2	Cyp2c70	1.60911	9.86217e-14	1.33237e-15	TRUE	UP
TC0100000333.mm.2	Bivm	1.10821	1.02475e-13	1.38904e-15	TRUE	UP
TC1900000566.mm.2	Cyp2c39	2.64159	1.07037e-13	1.45569e-15	TRUE	UP
TC1600001770.mm.2	St3gal6	1.48168	1.24833e-13	1.70896e-15	TRUE	UP
TC0500003465.mm.2	Pilrb2	1.62139	1.49191e-13	2.06258e-15	TRUE	UP
TC1300000425.mm.2	Ly86	2.34801	1.6338e-13	2.28082e-15	TRUE	UP
TC1600002152.mm.2	Tmprss2	2.23938	1.65646e-13	2.31991e-15	TRUE	UP
TC1000002886.mm.2	Trhde	1.85319	1.72573e-13	2.4247e-15	TRUE	UP
TC0100002392.mm.2	Trak2	1.38168	1.80976e-13	2.55733e-15	TRUE	UP
TC1000000812.mm.2	Bsg	0.728804	1.80976e-13	2.55905e-15	TRUE	UP
TC0400002633.mm.2	Acnat2	2.41986	1.92293e-13	2.75373e-15	TRUE	UP
TC1700001949.mm.2	Apom	0.924475	1.96075e-13	2.81671e-15	TRUE	UP
TC0100000836.mm.2	Ugt1a2; Ugt1a6a; Ugt1a6b; Ugt1a10; Ugt1a7c; Ugt1a5; Ugt1a9; Ugt1a1	0.865145	2.1557e-13	3.10648e-15	TRUE	UP
TC0400001974.mm.2	Eno1; Eno1b	0.780163	2.16671e-13	3.13673e-15	TRUE	UP
TC0400002849.mm.2	Megf9	1.02723	2.16671e-13	3.14185e-15	TRUE	UP
TC1100002649.mm.2	Tgtp2	2.62257	2.22718e-13	3.23957e-15	TRUE	UP
TC1300001155.mm.2	Cd180	2.11493	2.32629e-13	3.40469e-15	TRUE	UP
TC0800002734.mm.2	Ciapin1	1.22569	2.62562e-13	3.8546e-15	TRUE	UP
TC0700002644.mm.2	Axl	1.97665	2.99446e-13	4.43654e-15	TRUE	UP
TC1400001002.mm.2	Nudt18	1.80812	3.13053e-13	4.68044e-15	TRUE	UP
TC0200003165.mm.2	Fcna	1.71395	3.38183e-13	5.11706e-15	TRUE	UP
TC0700003775.mm.2	Acer3	1.21862	3.81257e-13	5.78598e-15	TRUE	UP
TC0X00003399.mm.2	Sh3bgrl	1.08241	4.11926e-13	6.28852e-15	TRUE	UP
TC0200002295.mm.2	H13	0.906866	4.9082e-13	7.55923e-15	TRUE	UP
TC0100000706.mm.2	Col4a3	4.29681	5.40777e-13	8.4017e-15	TRUE	UP
TC0100003593.mm.2	AI607873	1.95563	5.81776e-13	9.11727e-15	TRUE	UP
TC0400003792.mm.2	C1qb	2.37654	6.28592e-13	9.96417e-15	TRUE	UP
TC0400000446.mm.2	Npr2	1.47705	6.36197e-13	1.01134e-14	TRUE	UP
TC1500002327.mm.2	Prlr	2.07321	6.75521e-13	1.07993e-14	TRUE	UP
TC1000003140.mm.2	Coq10a	1.40393	6.85471e-13	1.09893e-14	TRUE	UP
TC0500002320.mm.2	Prom1	3.81255	7.08348e-13	1.14517e-14	TRUE	UP
TC1700002778.mm.2	Tapbp	1.031	7.52747e-13	1.22034e-14	TRUE	UP
TC1500002075.mm.2	Abcd2	3.32949	7.6127e-13	1.23759e-14	TRUE	UP
TC0200000933.mm.2	Gca	1.95824	8.33256e-13	1.36962e-14	TRUE	UP
TC0500003463.mm.2	Pilra	1.69889	9.00733e-13	1.48865e-14	TRUE	UP
TC0500003729.mm.2	Gbp8	1.44984	9.68491e-13	1.60935e-14	TRUE	UP
TC1700001522.mm.2	Fpr1	2.33808	9.70099e-13	1.61639e-14	TRUE	UP
TC1400001930.mm.2	Gch1	1.83603	9.79955e-13	1.63723e-14	TRUE	UP
TC0900002321.mm.2	Cib2	1.56543	9.94574e-13	1.66613e-14	TRUE	UP
TC1900001066.mm.2	Slc3a2	1.08379	1.07432e-12	1.81908e-14	TRUE	UP
TC1100004291.mm.2	Psme2b	1.20125	1.08648e-12	1.84519e-14	TRUE	UP
TC0200002594.mm.2	Cebpb	1.51009	1.33316e-12	2.30538e-14	TRUE	UP
TC1800001437.mm.2	Adrb2	1.79937	1.80623e-12	3.19666e-14	TRUE	UP
TC1800000965.mm.2	Gm17430	1.39736	2.02635e-12	3.63184e-14	TRUE	UP
TC0700001178.mm.2	Tm6sf1	1.63491	2.17351e-12	3.92497e-14	TRUE	UP
TC1100001632.mm.2	Stat5a	1.31428	2.47334e-12	4.47754e-14	TRUE	UP
TC0400001530.mm.2	Ptp4a2	0.855072	2.54622e-12	4.62094e-14	TRUE	UP
TC1900001476.mm.2	Cyp2c38	2.12495	2.9134e-12	5.33979e-14	TRUE	UP
TC0100003891.mm.2	Ifi203	1.55696	3.03408e-12	5.60676e-14	TRUE	UP
TC1700000839.mm.2	Rcan2	1.94043	3.07384e-12	5.72967e-14	TRUE	UP
TC0500003744.mm.2	Cyp3a41b	3.9488	3.07384e-12	5.73035e-14	TRUE	UP
TC0400001514.mm.2	Fndc5	1.89536	3.13479e-12	5.8585e-14	TRUE	UP
TC0500002415.mm.2	Sepsecs	1.07645	3.4361e-12	6.44598e-14	TRUE	UP
TC1900001765.mm.2	Vps51; Tm7sf2	1.41103	3.4361e-12	6.45256e-14	TRUE	UP
TC1000000744.mm.2	Lss	2.53063	3.53826e-12	6.66033e-14	TRUE	UP
TC0300002334.mm.2	Fdps	1.88018	3.59439e-12	6.78714e-14	TRUE	UP
TC1600000564.mm.2	Igsf11	1.48656	3.59439e-12	6.79836e-14	TRUE	UP
TC0600001035.mm.2	Mgll	1.59022	3.64705e-12	6.91439e-14	TRUE	UP
TC1100002921.mm.2	Ulk2	1.04522	3.67714e-12	6.98799e-14	TRUE	UP
TC0900000051.mm.2	Mmp27	2.53208	3.71837e-12	7.10459e-14	TRUE	UP
TC1900001484.mm.2	Pdlim1	1.65817	3.71837e-12	7.11658e-14	TRUE	UP
TC0200000651.mm.2	Ptgs1	1.70995	3.8e-12	7.30703e-14	TRUE	UP
TC1700001827.mm.2	Sik1	2.45303	3.87166e-12	7.46227e-14	TRUE	UP
TC0600003536.mm.2	Clec1b	1.42944	4.3134e-12	8.39138e-14	TRUE	UP
TC1200000462.mm.2	Srp54c; Srp54b	1.04344	4.90731e-12	9.63517e-14	TRUE	UP
TC0X00003437.mm.2	Il2rg	2.02627	5.05417e-12	9.99182e-14	TRUE	UP
TC0300001447.mm.2	Gbp2	1.8267	5.09206e-12	1.01126e-13	TRUE	UP
TC1300000278.mm.2	BC005537	0.743315	5.72857e-12	1.14282e-13	TRUE	UP
TC0400003681.mm.2	Themis2	2.39676	5.81963e-12	1.16361e-13	TRUE	UP
TC1400000076.mm.2	Pxk	0.921359	6.21492e-12	1.25384e-13	TRUE	UP
TC0800000734.mm.2	Tm6sf2	1.55719	6.6026e-12	1.33503e-13	TRUE	UP
TC0500002745.mm.2	G3bp2	1.38486	6.724e-12	1.3626e-13	TRUE	UP
TC1200002272.mm.2	Serpina6	1.84156	6.90405e-12	1.4022e-13	TRUE	UP
TC0700004565.mm.2	Ctsd; Ifitm10	0.813714	7.01512e-12	1.42807e-13	TRUE	UP
TC0600003433.mm.2	Itpr2	0.943569	7.69414e-12	1.58692e-13	TRUE	UP
TC0200004647.mm.2	Siglec1	1.85754	8.12883e-12	1.6839e-13	TRUE	UP
TC0500000532.mm.2	Pi4k2b	1.44879	8.28229e-12	1.72074e-13	TRUE	UP
TC0100001632.mm.2	Pyhin1	2.23745	8.28229e-12	1.72315e-13	TRUE	UP
TC1100002897.mm.2	Shmt1	1.42138	8.9414e-12	1.87235e-13	TRUE	UP
TC1700002692.mm.2	Calm2	0.84933	9.16811e-12	1.92756e-13	TRUE	UP
TC1100003055.mm.2	Cd68	2.07556	9.16811e-12	1.92809e-13	TRUE	UP
TC0600002324.mm.2	Ggct	1.47489	9.17438e-12	1.93354e-13	TRUE	UP
TC0900002676.mm.2	Mapk6	1.41054	9.43642e-12	1.99301e-13	TRUE	UP
TC0200001368.mm.2	Spi1	2.21897	9.57632e-12	2.02687e-13	TRUE	UP
TC1500000549.mm.2	Ly6e	1.41129	9.68663e-12	2.05894e-13	TRUE	UP
TC0300000693.mm.2	Cd5l	2.67447	9.93084e-12	2.1198e-13	TRUE	UP
TC1700001952.mm.2	Aif1	1.62661	1.03604e-11	2.22548e-13	TRUE	UP
TC0300002695.mm.2	Cd53	1.9063	1.08846e-11	2.34789e-13	TRUE	UP
TC0600000388.mm.2	Tbxas1	1.70409	1.11579e-11	2.42694e-13	TRUE	UP
TC0100003591.mm.2	Pydc4	2.39418	1.11613e-11	2.4327e-13	TRUE	UP
TC0200004219.mm.2	Cd44	2.23514	1.13378e-11	2.47628e-13	TRUE	UP
TC0600003539.mm.2	D630045J12Rik	0.770109	1.31373e-11	2.88115e-13	TRUE	UP
TC1300000763.mm.2	Mir23b; Mir27b; Mir24-1; 2010111I01Rik	1.12755	1.35635e-11	2.98682e-13	TRUE	UP
TC1800000625.mm.2	Csf1r	1.77239	1.41305e-11	3.12441e-13	TRUE	UP
TC1000002929.mm.2	Lyz2	2.3587	1.43208e-11	3.17294e-13	TRUE	UP
TC0600002114.mm.2	Parp12	1.46833	1.51774e-11	3.37641e-13	TRUE	UP
TC1700000934.mm.2	Treml4	2.12125	1.54184e-11	3.43696e-13	TRUE	UP
TC0600001532.mm.2	Clec12a	2.04462	1.59883e-11	3.5928e-13	TRUE	UP
TC0300003133.mm.2	Ifi44	2.91933	1.84577e-11	4.16432e-13	TRUE	UP
TC1100001070.mm.2	Rilp	0.774493	1.85581e-11	4.19534e-13	TRUE	UP
TC0200003298.mm.2	Uck1	1.74174	2.0203e-11	4.5945e-13	TRUE	UP
TC1200002524.mm.2	Serpina3f	1.31647	2.25964e-11	5.16931e-13	TRUE	UP
TC0600000325.mm.2	Akr1b10	1.18504	2.29183e-11	5.25328e-13	TRUE	UP
TC1100002642.mm.2	Gm5431	1.37156	2.3059e-11	5.29591e-13	TRUE	UP
TC0500001239.mm.2	Oasl2	1.94793	2.34166e-11	5.38858e-13	TRUE	UP
TC1300002079.mm.2	Cxcl14	2.31105	2.40247e-11	5.58261e-13	TRUE	UP
TC0100003888.mm.2	Ifi204	1.90085	2.42449e-11	5.65562e-13	TRUE	UP
TC0100003889.mm.2	Mnda	1.95504	2.51002e-11	5.87773e-13	TRUE	UP
TC0400003793.mm.2	C1qc	2.08582	2.73136e-11	6.42065e-13	TRUE	UP
TC0400003724.mm.2	Cd52	1.40585	2.78983e-11	6.57065e-13	TRUE	UP
TC0300001445.mm.2	Gbp7	2.20495	2.88283e-11	6.80267e-13	TRUE	UP
TC1000001599.mm.2	Cs	1.06978	3.0545e-11	7.22153e-13	TRUE	UP
TC1200000996.mm.2	9030617O03Rik	1.15652	3.07861e-11	7.29239e-13	TRUE	UP
TC0600002121.mm.2	Slc37a3	1.63964	3.10796e-11	7.37592e-13	TRUE	UP
TC1500000432.mm.2	Sqle	2.54714	3.11679e-11	7.41091e-13	TRUE	UP
TC1800000249.mm.2	Lims2	1.47082	3.14588e-11	7.5084e-13	TRUE	UP
TC1200001296.mm.2	Zfp386	0.956123	3.26537e-11	7.83662e-13	TRUE	UP
TC1600001556.mm.2	Parp14	1.43415	3.26537e-11	7.83772e-13	TRUE	UP
TC0300002506.mm.2	Fcgr1	1.79469	3.34758e-11	8.05011e-13	TRUE	UP
TC0600000553.mm.2	Sspo	1.61368	3.47412e-11	8.38569e-13	TRUE	UP
TC0700000236.mm.2	Slc1a5	1.79815	3.51486e-11	8.5157e-13	TRUE	UP
TC1100001209.mm.2	Tmem98	1.18308	3.57302e-11	8.67269e-13	TRUE	UP
TC0800001176.mm.2	Cdh5	1.13223	3.60242e-11	8.76028e-13	TRUE	UP
TC1000001595.mm.2	Apof	0.901975	3.6564e-11	8.91127e-13	TRUE	UP
TC0100000632.mm.2	Slc11a1	1.71029	3.80005e-11	9.29927e-13	TRUE	UP
TC0X00002676.mm.2	Vsig4	1.86495	3.80005e-11	9.30931e-13	TRUE	UP
TC1600000224.mm.2	Klhl22	0.828877	3.83125e-11	9.40301e-13	TRUE	UP
TC1200000460.mm.2	Srp54b	0.976649	3.89953e-11	9.58814e-13	TRUE	UP
TC0100002337.mm.2	Stk17b	1.11755	4.08614e-11	1.01206e-12	TRUE	UP
TC0100001520.mm.2	Mpc2	1.42375	4.13858e-11	1.02691e-12	TRUE	UP
TC0100001522.mm.2	Adcy10	3.54996	4.33978e-11	1.0827e-12	TRUE	UP
TC0800001255.mm.2	Cdh1	1.50029	4.36654e-11	1.09134e-12	TRUE	UP
TC0800003059.mm.2	Slc7a5	1.4098	4.60809e-11	1.15794e-12	TRUE	UP
TC1600001042.mm.2	Cbr1	1.59866	4.61261e-11	1.16323e-12	TRUE	UP
TC1000000547.mm.2	Psap	0.631232	5.00604e-11	1.26921e-12	TRUE	UP
TC1100002233.mm.2	Cobl	1.19527	5.29748e-11	1.35025e-12	TRUE	UP
TC0100001806.mm.2	Esrrg	1.41246	5.61371e-11	1.43338e-12	TRUE	UP
TC0900002115.mm.2	Sc5d	0.76067	5.74998e-11	1.47336e-12	TRUE	UP
TC1600001966.mm.2	App	0.893442	5.88728e-11	1.51119e-12	TRUE	UP
TC1200002251.mm.2	Lgmn	1.3883	6.25552e-11	1.60853e-12	TRUE	UP
TC1100002648.mm.2	9930111J21Rik2	1.60768	6.73755e-11	1.73855e-12	TRUE	UP
TC0500003368.mm.2	Ncf1	1.52011	7.00099e-11	1.81598e-12	TRUE	UP
TC0700004610.mm.2	Ccnd1; Mir3962	2.55049	7.04088e-11	1.8295e-12	TRUE	UP
TC1100002829.mm.2	2210407C18Rik	3.73678	7.0849e-11	1.84413e-12	TRUE	UP
TC0100003890.mm.2	Mndal	1.47761	7.15795e-11	1.86637e-12	TRUE	UP
TC0500003181.mm.2	Oas1a	1.77183	7.2412e-11	1.89134e-12	TRUE	UP
TC1200001030.mm.2	Ifi27	1.45065	7.43276e-11	1.95141e-12	TRUE	UP
TC0600000182.mm.2	Cped1	1.10056	7.44318e-11	1.9575e-12	TRUE	UP
TC1100002967.mm.2	Cox10	0.761558	8.11326e-11	2.15564e-12	TRUE	UP
TC0200003720.mm.2	Slc25a12	1.21221	8.4301e-11	2.24742e-12	TRUE	UP
TC0900002320.mm.2	Dmxl2	0.867989	9.00509e-11	2.41638e-12	TRUE	UP
TC0900001768.mm.2	Endod1	0.932536	9.07722e-11	2.44038e-12	TRUE	UP
TC0400002474.mm.2	Enho	1.16082	9.61507e-11	2.60229e-12	TRUE	UP
TC0900003275.mm.2	Higd1a	1.07295	9.71376e-11	2.63775e-12	TRUE	UP
TC0300002053.mm.2	P2ry13	1.7594	1.02037e-10	2.7754e-12	TRUE	UP
TC0800000845.mm.2	Hmox1	1.54636	1.02089e-10	2.7814e-12	TRUE	UP
TC1400002162.mm.2	Phf11b	1.87301	1.03319e-10	2.81958e-12	TRUE	UP
TC0X00003358.mm.2	Tmsb4x	1.51243	1.10109e-10	3.01478e-12	TRUE	UP
TC0800001112.mm.2	Cpne2	1.04408	1.15063e-10	3.15561e-12	TRUE	UP
TC1300001812.mm.2	Nrn1	1.18393	1.18031e-10	3.24763e-12	TRUE	UP
TC0400002634.mm.2	Acnat1	2.19779	1.22239e-10	3.37441e-12	TRUE	UP
TC0400003208.mm.2	Acot11	1.69518	1.23719e-10	3.42644e-12	TRUE	UP
TC0500003399.mm.2	Ccl24	1.55293	1.24338e-10	3.44917e-12	TRUE	UP
TC1100000302.mm.2	Rtn4	1.18553	1.28148e-10	3.56063e-12	TRUE	UP
TC0300003077.mm.2	Sh3glb1	0.890924	1.29935e-10	3.61615e-12	TRUE	UP
TC1300000919.mm.2	Glrx	1.14207	1.30949e-10	3.65024e-12	TRUE	UP
TC0500000170.mm.2	Gsap	1.3158	1.31897e-10	3.68262e-12	TRUE	UP
TC0800002119.mm.2	Asah1	0.890779	1.32654e-10	3.71048e-12	TRUE	UP
TC1200000458.mm.2	Srp54a	0.933442	1.32654e-10	3.71569e-12	TRUE	UP
TC0800000096.mm.2	Arhgef7	0.890634	1.34863e-10	3.78972e-12	TRUE	UP
TC0500001775.mm.2	Cyp3a59	1.82917	1.51671e-10	4.2757e-12	TRUE	UP
TC0100003533.mm.2	Fcer1g	1.86694	1.56699e-10	4.42448e-12	TRUE	UP
TC0500001225.mm.2	Mvk	1.72047	1.61534e-10	4.5683e-12	TRUE	UP
TC0200000352.mm.2	Apbb1ip	1.5654	1.63402e-10	4.62846e-12	TRUE	UP
TC0X00001829.mm.2	Cybb	2.14071	1.67091e-10	4.74802e-12	TRUE	UP
TC1400002091.mm.2	Psme2	0.711793	1.67151e-10	4.75726e-12	TRUE	UP
TC0600000359.mm.2	Akr1d1	1.50203	1.6805e-10	4.79039e-12	TRUE	UP
TC0800000659.mm.2	Ddx60	1.92895	1.74578e-10	4.9922e-12	TRUE	UP
TC1900001203.mm.2	Psat1	2.38446	1.74859e-10	5.016e-12	TRUE	UP
TC0800002553.mm.2	Tecr	0.634203	1.80067e-10	5.1735e-12	TRUE	UP
TC1200002101.mm.2	0610007P14Rik	1.16788	2.11952e-10	6.12776e-12	TRUE	UP
TC0500000468.mm.2	Cd38	1.31382	2.16808e-10	6.27793e-12	TRUE	UP
TC0300000903.mm.2	Ctss	1.80409	2.30888e-10	6.71682e-12	TRUE	UP
TC0400001557.mm.2	Laptm5	1.79288	2.34079e-10	6.82019e-12	TRUE	UP
TC0500003180.mm.2	Oas1g	1.39933	2.38294e-10	6.95372e-12	TRUE	UP
TC0600001369.mm.2	Usp18	2.25996	2.39046e-10	6.98644e-12	TRUE	UP
TC0100003319.mm.2	Soat1	1.72486	2.42121e-10	7.08722e-12	TRUE	UP
TC0600003503.mm.2	Herc6	1.57572	2.5419e-10	7.45194e-12	TRUE	UP
TC0500003730.mm.2	Gbp9	1.44065	2.54575e-10	7.47468e-12	TRUE	UP
TC0100000927.mm.2	Sned1; Mir6901	0.986069	2.74612e-10	8.08773e-12	TRUE	UP
TC1100004292.mm.2	9930111J21Rik1; 9930111J21Rik2	1.49344	2.78084e-10	8.20253e-12	TRUE	UP
TC1000000759.mm.2	Itgb2	1.91565	2.85693e-10	8.45268e-12	TRUE	UP
TC0500003464.mm.2	Pilrb1	1.37857	2.93332e-10	8.69192e-12	TRUE	UP
TC0100001611.mm.2	Kcnj10	1.2971	3.3035e-10	9.84831e-12	TRUE	UP
TC0800001186.mm.2	Pdp2	1.23768	3.30889e-10	9.87929e-12	TRUE	UP
TC1500001935.mm.2	Desi1	0.948188	3.3375e-10	9.97975e-12	TRUE	UP
TC1200001272.mm.2	Pld4	1.94263	3.46456e-10	1.03753e-11	TRUE	UP
TC0500003202.mm.2	Cux2	3.41707	3.5046e-10	1.0511e-11	TRUE	UP
TC1100001634.mm.2	Atp6v0a1	0.791504	3.54959e-10	1.06619e-11	TRUE	UP
TC0600003236.mm.2	Clec7a	2.11388	3.68947e-10	1.10987e-11	TRUE	UP
TC1100001238.mm.2	Slfn2	1.47928	3.70509e-10	1.11623e-11	TRUE	UP
TC0700000168.mm.2	Sult2a5	2.30161	3.75754e-10	1.13638e-11	TRUE	UP
TC1700002780.mm.2	H2-DMb1	1.39721	3.75934e-10	1.13935e-11	TRUE	UP
TC0300002343.mm.2	Slc50a1	0.872645	3.80703e-10	1.15723e-11	TRUE	UP
TC0900000296.mm.2	Ets1	0.927156	3.83373e-10	1.16707e-11	TRUE	UP
TC1100003382.mm.2	Slfn8	1.76172	3.99179e-10	1.22058e-11	TRUE	UP
TC0800002558.mm.2	Adgre5; Mir1668	1.30038	4.14832e-10	1.27218e-11	TRUE	UP
TC0200005181.mm.2	Znfx1	1.32013	4.15376e-10	1.27572e-11	TRUE	UP
TC0700004207.mm.2	Igsf6	1.72998	4.2827e-10	1.31725e-11	TRUE	UP
TC0500000997.mm.2	Arhgap24	1.19938	4.39195e-10	1.35283e-11	TRUE	UP
TC1900000225.mm.2	Ms4a6b	1.73761	4.39407e-10	1.35546e-11	TRUE	UP
TC0500002919.mm.2	Tgfbr3	1.25158	4.67407e-10	1.44394e-11	TRUE	UP
TC0700001710.mm.2	Acsm2	1.81946	4.73142e-10	1.46379e-11	TRUE	UP
TC1500000742.mm.2	Srebf2	1.12553	4.94899e-10	1.53556e-11	TRUE	UP
TC1700002789.mm.2	H2-Q7; H2-Q9	0.894275	5.01879e-10	1.55947e-11	TRUE	UP
TC0200005472.mm.2	Eng	1.05853	5.27501e-10	1.64384e-11	TRUE	UP
TC0700003028.mm.2	Emp3	1.60076	5.29852e-10	1.65355e-11	TRUE	UP
TC0300001137.mm.2	Sort1	1.75967	5.54744e-10	1.73373e-11	TRUE	UP
TC1700002820.mm.2	C920025E04Rik	0.749257	5.94289e-10	1.86267e-11	TRUE	UP
TC0300001639.mm.2	Fabp4	1.33116	5.97128e-10	1.87426e-11	TRUE	UP
TC0100000237.mm.2	Hs6st1	1.1719	6.0274e-10	1.8973e-11	TRUE	UP
TC0100000682.mm.2	Utp14b; Acsl3	2.23031	6.1773e-10	1.94727e-11	TRUE	UP
TC0700004515.mm.2	Ifitm3	1.01949	6.2097e-10	1.96028e-11	TRUE	UP
TC1100001236.mm.2	Slfn5	1.37243	6.22893e-10	1.96916e-11	TRUE	UP
TC1700000085.mm.2	Mpc1	0.847844	6.52022e-10	2.06418e-11	TRUE	UP
TC1200002525.mm.2	Serpina3g	1.0527	6.61149e-10	2.09613e-11	TRUE	UP
TC0200001380.mm.2	Arhgap1	0.804257	6.76718e-10	2.1515e-11	TRUE	UP
TC1500000008.mm.2	Oxct1	1.13699	7.01552e-10	2.23678e-11	TRUE	UP
TC0500002078.mm.2	Fastk	0.766685	7.20519e-10	2.30049e-11	TRUE	UP
TC1700002655.mm.2	Abcg5	2.63486	7.38427e-10	2.361e-11	TRUE	UP
TC1100001072.mm.2	Slc43a2	1.16812	7.46475e-10	2.39009e-11	TRUE	UP
TC1700000936.mm.2	B430306N03Rik	1.90438	7.68263e-10	2.46331e-11	TRUE	UP
TC1000002549.mm.2	Tle6	1.16063	7.79345e-10	2.50937e-11	TRUE	UP
TC0500003504.mm.2	Mad1l1	1.42457	8.64326e-10	2.79857e-11	TRUE	UP
TC1000000170.mm.2	Gm5420	1.08679	8.76432e-10	2.84566e-11	TRUE	UP
TC0100000743.mm.2	Gm7609	1.20424	8.96339e-10	2.91433e-11	TRUE	UP
TC1500000782.mm.2	Pnpla3	5.24438	9.3774e-10	3.05739e-11	TRUE	UP
TC1400001086.mm.2	Epsti1	1.32627	9.50031e-10	3.10602e-11	TRUE	UP
TC1800000498.mm.2	Eno1b	0.585272	9.7666e-10	3.20627e-11	TRUE	UP
TC1000000100.mm.2	Hivep2	1.02837	9.94436e-10	3.26911e-11	TRUE	UP
TC0800003069.mm.2	Mvd	2.99667	9.96978e-10	3.28196e-11	TRUE	UP
TC0200000274.mm.2	Plxdc2	1.26264	1.09795e-09	3.63411e-11	TRUE	UP
TC0600000609.mm.2	Snx10	1.51471	1.14091e-09	3.78658e-11	TRUE	UP
TC1700002414.mm.2	Rab31	1.15732	1.15323e-09	3.83786e-11	TRUE	UP
TC1100000484.mm.2	Timd4	1.36199	1.17602e-09	3.92108e-11	TRUE	UP
TC0200001681.mm.2	Fmn1	1.13632	1.17602e-09	3.9243e-11	TRUE	UP
TC1900000019.mm.2	Unc93b1	0.96837	1.17874e-09	3.94399e-11	TRUE	UP
TC1500001838.mm.2	Rac2	1.53725	1.18936e-09	3.9849e-11	TRUE	UP
TC0700001910.mm.2	Plekha1	0.890308	1.19359e-09	4.00444e-11	TRUE	UP
TC1100003141.mm.2	Slc13a5	2.31643	1.19838e-09	4.03415e-11	TRUE	UP
TC1400000459.mm.2	Ear12; Ear2; Ear3	1.59027	1.19838e-09	4.0367e-11	TRUE	UP
TC0600001418.mm.2	Cd163	1.6325	1.2929e-09	4.37255e-11	TRUE	UP
TC0600001787.mm.2	Samd9l	1.81043	1.30108e-09	4.40609e-11	TRUE	UP
TC0700002503.mm.2	Bcl3	1.994	1.40894e-09	4.80939e-11	TRUE	UP
TC0200005013.mm.2	Samhd1	1.50183	1.43605e-09	4.91487e-11	TRUE	UP
TC0700003938.mm.2	Trim12a	1.44647	1.58047e-09	5.41627e-11	TRUE	UP
TC1100000362.mm.2	Lcp2	1.5138	1.59061e-09	5.45818e-11	TRUE	UP
TC0700003943.mm.2	Trim30a	1.84489	1.60081e-09	5.50041e-11	TRUE	UP
TC1700002822.mm.2	H2-T22; H2-T9	0.919257	1.75824e-09	6.08884e-11	TRUE	UP
TC0900001563.mm.2	Itga9	0.905851	1.99715e-09	6.93419e-11	TRUE	UP
TC1200000033.mm.2	Gm6682	1.18967	2.17484e-09	7.5609e-11	TRUE	UP
TC0100000375.mm.2	Stat1	1.45444	2.36125e-09	8.24087e-11	TRUE	UP
TC1100000965.mm.2	Kif1c; Mir6925	0.84038	2.37993e-09	8.31678e-11	TRUE	UP
TC1500000870.mm.2	Miox	1.07341	2.42841e-09	8.49713e-11	TRUE	UP
TC1600000346.mm.2	Rtp4	1.81024	2.46254e-09	8.64983e-11	TRUE	UP
TC1100001150.mm.2	Proca1	1.0565	2.50402e-09	8.8068e-11	TRUE	UP
TC1800000060.mm.2	Fzd8	1.65341	2.67194e-09	9.42145e-11	TRUE	UP
TC1800001181.mm.2	Tmem173	1.35433	2.69338e-09	9.51127e-11	TRUE	UP
TC1900000502.mm.2	Ifit3b	2.17866	2.77038e-09	9.81847e-11	TRUE	UP
TC0100003264.mm.2	Rgl1	0.944475	2.91055e-09	1.03392e-10	TRUE	UP
TC1600000475.mm.2	Heg1	0.937174	3.08448e-09	1.10289e-10	TRUE	UP
TC1100004053.mm.2	Cd300ld	1.58437	3.2395e-09	1.16415e-10	TRUE	UP
TC0200002796.mm.2	Ogfr	0.824167	3.35231e-09	1.20922e-10	TRUE	UP
TC1400002002.mm.2	Rnase2a	2.2792	3.44938e-09	1.24579e-10	TRUE	UP
TC1100004278.mm.2	Vps25	0.680888	3.49794e-09	1.26648e-10	TRUE	UP
TC0900003199.mm.2	Tgfbr2	0.995707	3.52242e-09	1.27693e-10	TRUE	UP
TC1100003326.mm.2	Evi2a; Evi2b; Gm21975	1.50207	3.52561e-09	1.27967e-10	TRUE	UP
TC0800001594.mm.2	Nrp1; Mir1903	0.976558	3.58919e-09	1.30437e-10	TRUE	UP
TC1200000203.mm.2	Rrm2	1.92406	3.69491e-09	1.34611e-10	TRUE	UP
TC1100002641.mm.2	Irgm1	1.41344	3.75853e-09	1.37099e-10	TRUE	UP
TC0500002068.mm.2	Fam126a	1.24873	3.78531e-09	1.38246e-10	TRUE	UP
TC1100001147.mm.2	Tlcd1; Mir7653	0.902971	3.90011e-09	1.42965e-10	TRUE	UP
TC0700004296.mm.2	Aldoa	0.948116	3.98258e-09	1.46347e-10	TRUE	UP
TC1600001557.mm.2	Dtx3l	0.914384	3.98672e-09	1.46679e-10	TRUE	UP
TC0200002366.mm.2	Trp53inp2	1.57101	4.02128e-09	1.48132e-10	TRUE	UP
TC0100003167.mm.2	Ptprc	1.17862	4.04865e-09	1.49661e-10	TRUE	UP
TC1200001663.mm.2	Ifrd1	2.11571	4.04865e-09	1.49719e-10	TRUE	UP
TC1900000188.mm.2	Fads1	0.641286	4.22674e-09	1.57032e-10	TRUE	UP
TC1500001002.mm.2	Tuba1c	1.07915	4.28047e-09	1.59221e-10	TRUE	UP
TC1700000622.mm.2	Psmb8	1.39339	4.38047e-09	1.63716e-10	TRUE	UP
TC1100002003.mm.2	Rnf213	1.78072	4.66325e-09	1.7451e-10	TRUE	UP
TC0200003601.mm.2	Ly75	1.21531	5.22614e-09	1.9628e-10	TRUE	UP
TC1000001576.mm.2	BC089597	1.08611	5.34179e-09	2.00865e-10	TRUE	UP
TC0700002705.mm.2	Nfkbib	0.865072	5.63671e-09	2.14239e-10	TRUE	UP
TC0600002663.mm.2	Rab43	1.17018	5.83443e-09	2.22016e-10	TRUE	UP
TC0900001431.mm.2	Shisa5	1.62841	6.04627e-09	2.30484e-10	TRUE	UP
TC0100001617.mm.2	Tagln2	1.65054	6.04627e-09	2.30805e-10	TRUE	UP
TC0300000137.mm.2	Cp	0.863587	6.04627e-09	2.30894e-10	TRUE	UP
TC1700002132.mm.2	Slc25a27	1.25591	6.14432e-09	2.35189e-10	TRUE	UP
TC0200000245.mm.2	Mrc1	0.889928	6.14432e-09	2.35192e-10	TRUE	UP
TC1900001630.mm.2	Sh3pxd2a	1.50551	6.17951e-09	2.36817e-10	TRUE	UP
TC0600001647.mm.2	Pik3c2g	1.0996	6.59568e-09	2.5336e-10	TRUE	UP
TC1500002199.mm.2	Tuba1b	0.879837	6.90905e-09	2.66304e-10	TRUE	UP
TC0100002324.mm.2	Mfsd6	1.32558	6.90905e-09	2.66331e-10	TRUE	UP
TC1200001908.mm.2	Dhrs7	1.06493	7.12103e-09	2.74823e-10	TRUE	UP
TC0100003401.mm.2	Fmo1	0.833822	7.42399e-09	2.87518e-10	TRUE	UP
TC1200002269.mm.2	Ifi27l2a	1.49284	7.45028e-09	2.88872e-10	TRUE	UP
TC1700001953.mm.2	Lst1	1.22969	7.52256e-09	2.92013e-10	TRUE	UP
TC1700000990.mm.2	Adgre4	1.46009	7.68296e-09	2.98586e-10	TRUE	UP
TC1100003506.mm.2	Scpep1	1.0108	7.90336e-09	3.07507e-10	TRUE	UP
TC0500002420.mm.2	Sel1l3	1.0588	8.25426e-09	3.22458e-10	TRUE	UP
TC1400002280.mm.2	Dpysl2	1.19703	8.3995e-09	3.28702e-10	TRUE	UP
TC0200002308.mm.2	Hck	1.58469	8.48086e-09	3.32268e-10	TRUE	UP
TC1900000501.mm.2	Ifit3	2.09025	8.84878e-09	3.48277e-10	TRUE	UP
TC1100002045.mm.2	Rac3	0.950833	9.31906e-09	3.67206e-10	TRUE	UP
TC0300002847.mm.2	Abcd3	0.938841	9.73496e-09	3.84471e-10	TRUE	UP
TC0300000766.mm.2	Pmvk	2.14545	9.79155e-09	3.87147e-10	TRUE	UP
TC0500000353.mm.2	Slc5a1	1.86683	1.03243e-08	4.09141e-10	TRUE	UP
TC0500002840.mm.2	Plac8	2.23801	1.04139e-08	4.13161e-10	TRUE	UP
TC1900000211.mm.2	Slc15a3	1.63553	1.08579e-08	4.31754e-10	TRUE	UP
TC1400000350.mm.2	1810011H11Rik	0.933351	1.10383e-08	4.39922e-10	TRUE	UP
TC0600003337.mm.2	Arhgdib	1.08281	1.11763e-08	4.45924e-10	TRUE	UP
TC0400004171.mm.2	Isg15	1.26426	1.11839e-08	4.47237e-10	TRUE	UP
TC0100003550.mm.2	Slamf7	1.34846	1.27146e-08	5.14161e-10	TRUE	UP
TC1400002869.mm.2	Phf11d; Phf11c	1.3431	1.27146e-08	5.14174e-10	TRUE	UP
TC1500002012.mm.2	Cerk	1.1825	1.28527e-08	5.20335e-10	TRUE	UP
TC0100003204.mm.2	Rgs2	1.6735	1.39383e-08	5.66169e-10	TRUE	UP
TC1500001727.mm.2	Ly6i	1.13815	1.40441e-08	5.71098e-10	TRUE	UP
TC1400001012.mm.2	Gfra2	1.38181	1.47075e-08	5.994e-10	TRUE	UP
TC0200002362.mm.2	Dynlrb1	0.956322	1.51894e-08	6.2041e-10	TRUE	UP
TC0400002601.mm.2	Trim14	1.09418	1.56208e-08	6.39437e-10	TRUE	UP
TC0200003017.mm.2	Nebl	1.07558	1.60199e-08	6.57937e-10	TRUE	UP
TC1500000939.mm.2	Ano6	1.08163	1.60294e-08	6.5905e-10	TRUE	UP
TC1700002779.mm.2	H2-DMb2	1.9367	1.6348e-08	6.72883e-10	TRUE	UP
TC1300001169.mm.2	Sgtb	1.25792	1.64747e-08	6.79583e-10	TRUE	UP
TC0900000655.mm.2	Gldn	1.43772	1.66987e-08	6.90329e-10	TRUE	UP
TC0600002045.mm.2	Akr1b3; Gm6644	0.921975	1.67564e-08	6.93683e-10	TRUE	UP
TC0200002367.mm.2	Acss2	2.00832	1.7367e-08	7.203e-10	TRUE	UP
TC1100000989.mm.2	Xaf1	1.77208	1.78498e-08	7.41933e-10	TRUE	UP
TC1100004159.mm.2	Lgals3bp	1.75866	1.87014e-08	7.79856e-10	TRUE	UP
TC0700000041.mm.2	Suv420h2	0.914982	1.90123e-08	7.97102e-10	TRUE	UP
TC1500001608.mm.2	A1bg	3.79275	1.95637e-08	8.22862e-10	TRUE	UP
TC0700000561.mm.2	Tyrobp	1.35183	1.96858e-08	8.28885e-10	TRUE	UP
TC0600000841.mm.2	St3gal5	1.92681	1.98776e-08	8.37857e-10	TRUE	UP
TC0900002213.mm.2	Sidt2	0.90433	2.01813e-08	8.51568e-10	TRUE	UP
TC0X00002061.mm.2	Ndufa1	0.874203	2.14887e-08	9.08669e-10	TRUE	UP
TC0100003697.mm.2	Lbr	1.03411	2.25142e-08	9.56088e-10	TRUE	UP
TC1700001034.mm.2	Adgre1	1.16754	2.2945e-08	9.75417e-10	TRUE	UP
TC0700002951.mm.2	Siglece	1.52359	2.30689e-08	9.81721e-10	TRUE	UP
TC0500000591.mm.2	Tbc1d1	0.885199	2.34758e-08	1.00009e-09	TRUE	UP
TC0500003028.mm.2	Sgsm1	1.78772	2.49157e-08	1.06256e-09	TRUE	UP
TC1500000688.mm.2	Apobec3	1.24743	2.5929e-08	1.10811e-09	TRUE	UP
TC0400002523.mm.2	Cd72	1.54418	2.63308e-08	1.12646e-09	TRUE	UP
TC1200000459.mm.2	1700047I17Rik2; Fam177a	0.936304	2.67856e-08	1.14834e-09	TRUE	UP
TC1200000461.mm.2	1700047I17Rik2; Fam177a	0.936304	2.67856e-08	1.14834e-09	TRUE	UP
TC1100004265.mm.2	Igtp	1.81078	2.6861e-08	1.15277e-09	TRUE	UP
TC0100001574.mm.2	Fcgr4	1.58603	2.72002e-08	1.16856e-09	TRUE	UP
TC1700001905.mm.2	H2-Aa	1.23618	2.76416e-08	1.19001e-09	TRUE	UP
TC0600003268.mm.2	Ybx3	1.00659	2.83928e-08	1.22619e-09	TRUE	UP
TC1200001237.mm.2	Tnfaip2	1.54933	2.88081e-08	1.24672e-09	TRUE	UP
TC0800000679.mm.2	44256	1.36469	2.95124e-08	1.27985e-09	TRUE	UP
TC1900000399.mm.2	Dock8	0.948424	3.19147e-08	1.38978e-09	TRUE	UP
TC1700002308.mm.2	Stap2	0.799764	3.23127e-08	1.41002e-09	TRUE	UP
TC0300001306.mm.2	Elovl6	2.47239	3.28056e-08	1.43449e-09	TRUE	UP
TC1500002347.mm.2	Parp10	1.01701	3.51044e-08	1.54291e-09	TRUE	UP
TC0900003335.mm.2	Uba7	0.868007	3.54724e-08	1.56072e-09	TRUE	UP
TC0200001045.mm.2	Itga6	1.06141	3.60234e-08	1.58979e-09	TRUE	UP
TC0X00001047.mm.2	Uprt	1.13332	3.70573e-08	1.63876e-09	TRUE	UP
TC1500001982.mm.2	Sult4a1	1.56248	3.71232e-08	1.64334e-09	TRUE	UP
TC0500003685.mm.2	N4bp2l1	1.27159	3.71474e-08	1.64609e-09	TRUE	UP
TC0800001031.mm.2	Adcy7	0.879855	3.85611e-08	1.71742e-09	TRUE	UP
TC0100003589.mm.2	Gm4955	1.34444	3.9134e-08	1.74469e-09	TRUE	UP
TC1600001580.mm.2	Cd86	1.17641	4.04186e-08	1.80379e-09	TRUE	UP
TC0800002403.mm.2	Ifi30	1.80272	4.36385e-08	1.95338e-09	TRUE	UP
TC0600002221.mm.2	Zfp467	1.13605	4.38686e-08	1.96763e-09	TRUE	UP
TC1700002781.mm.2	H2-Ab1	1.16991	4.65366e-08	2.09987e-09	TRUE	UP
TC1000002727.mm.2	Mrpl42	0.616938	4.72959e-08	2.13626e-09	TRUE	UP
TC0100000216.mm.2	Dst	1.65663	4.86038e-08	2.19753e-09	TRUE	UP
TC0700001913.mm.2	Htra1	1.27409	4.9033e-08	2.21914e-09	TRUE	UP
TC1800000535.mm.2	Snx24	1.10899	4.9972e-08	2.26839e-09	TRUE	UP
TC0400002580.mm.2	Shb	0.833967	5.01303e-08	2.27783e-09	TRUE	UP
TC0500000536.mm.2	Slc34a2	4.21366	5.10535e-08	2.32208e-09	TRUE	UP
TC0700004008.mm.2	Gm4759	1.10861	5.1761e-08	2.35892e-09	TRUE	UP
TC0700002143.mm.2	Lair1	1.25884	5.46326e-08	2.49471e-09	TRUE	UP
TC1100002015.mm.2	Baiap2	1.49083	5.53985e-08	2.53218e-09	TRUE	UP
TC0700000806.mm.2	Josd2; Mir7052	1.06078	5.64728e-08	2.58382e-09	TRUE	UP
TC1000002260.mm.2	Srgn	1.04605	5.69385e-08	2.61026e-09	TRUE	UP
TC1100004059.mm.2	Cd300e	1.62582	5.8895e-08	2.70261e-09	TRUE	UP
TC1700002823.mm.2	H2-T10	0.852464	5.9578e-08	2.73663e-09	TRUE	UP
TC0800002102.mm.2	Msr1	1.02458	5.98439e-08	2.75423e-09	TRUE	UP
TC1300002531.mm.2	Naip5	1.04221	6.16835e-08	2.84168e-09	TRUE	UP
TC0900002389.mm.2	Pml	0.982283	6.22887e-08	2.87236e-09	TRUE	UP
TC1500000784.mm.2	Samm50	0.823496	6.26149e-08	2.89022e-09	TRUE	UP
TC1300002481.mm.2	Hexb	1.13607	6.28414e-08	2.90351e-09	TRUE	UP
TC1800000396.mm.2	Rnf14	0.651957	6.34965e-08	2.93664e-09	TRUE	UP
TC0900000199.mm.2	AB124611	1.2325	6.42037e-08	2.97223e-09	TRUE	UP
TC0200004737.mm.2	Kif16b	0.772156	6.69135e-08	3.10069e-09	TRUE	UP
TC0400002434.mm.2	Ddx58	1.16174	6.69653e-08	3.10611e-09	TRUE	UP
TC1700001811.mm.2	Tff3	3.80725	6.79011e-08	3.15563e-09	TRUE	UP
TC0700004011.mm.2	Gm1966	1.29719	6.86232e-08	3.20155e-09	TRUE	UP
TC0100003240.mm.2	Prg4	1.61663	6.8827e-08	3.21416e-09	TRUE	UP
TC0100000792.mm.2	Cops7b	0.894366	7.04275e-08	3.29207e-09	TRUE	UP
TC0300002998.mm.2	Bank1	1.42308	7.1472e-08	3.34411e-09	TRUE	UP
TC0700004104.mm.2	Lyve1	1.78978	7.39105e-08	3.46154e-09	TRUE	UP
TC0700003406.mm.2	Klf13	1.22384	7.43713e-08	3.48647e-09	TRUE	UP
TC0800001407.mm.2	Plcg2	0.933442	7.43783e-08	3.49349e-09	TRUE	UP
TC0600000327.mm.2	Akr1b7	2.07241	7.44944e-08	3.50645e-09	TRUE	UP
TC0X00002393.mm.2	BC023829	1.10127	7.8416e-08	3.7008e-09	TRUE	UP
TC0600002811.mm.2	Gm765	0.949112	8.40691e-08	3.97517e-09	TRUE	UP
TC1300002691.mm.2	Gzma	1.16065	8.44689e-08	3.99788e-09	TRUE	UP
TC1900001095.mm.2	Fads2	0.930018	8.73451e-08	4.13794e-09	TRUE	UP
TC1300002517.mm.2	Ptcd2	0.608641	9.1641e-08	4.34971e-09	TRUE	UP
TC1100003314.mm.2	Lgals9	0.950779	9.2382e-08	4.39038e-09	TRUE	UP
TC0700002974.mm.2	Atf5	1.79158	9.67632e-08	4.61026e-09	TRUE	UP
TC0100001755.mm.2	Aida	0.700598	9.67975e-08	4.62933e-09	TRUE	UP
TC1000000674.mm.2	Slc16a9	1.05208	9.93631e-08	4.76545e-09	TRUE	UP
TC1300002090.mm.2	Klhl3	0.939982	1.08727e-07	5.23412e-09	TRUE	UP
TC1100001115.mm.2	Ssh2	0.987917	1.10628e-07	5.33062e-09	TRUE	UP
TC1100000681.mm.2	Gm12250	1.89226	1.10774e-07	5.34266e-09	TRUE	UP
TC1500000199.mm.2	Dap	0.784837	1.14295e-07	5.52275e-09	TRUE	UP
TC1700002819.mm.2	H2-T23	0.673714	1.14411e-07	5.53352e-09	TRUE	UP
TC0700004631.mm.2	Pirb	1.55543	1.1642e-07	5.63593e-09	TRUE	UP
TC0600003079.mm.2	C3ar1	1.40643	1.17902e-07	5.71299e-09	TRUE	UP
TC0X00001564.mm.2	2210013O21Rik	0.928007	1.18656e-07	5.75486e-09	TRUE	UP
TC1900000888.mm.2	Tcirg1	0.783514	1.28188e-07	6.25178e-09	TRUE	UP
TC1600000033.mm.2	Hmox2	0.691685	1.36532e-07	6.67102e-09	TRUE	UP
TC0X00002453.mm.2	G6pdx	1.55665	1.41794e-07	6.94729e-09	TRUE	UP
TC1200002154.mm.2	Ston2	1.11589	1.42731e-07	6.99965e-09	TRUE	UP
TC1200000225.mm.2	Cmpk2	1.87112	1.48361e-07	7.29577e-09	TRUE	UP
TC1700000684.mm.2	H2-Q4	0.765942	1.48394e-07	7.3041e-09	TRUE	UP
TC0400004221.mm.2	AU022252	0.743696	1.50881e-07	7.43331e-09	TRUE	UP
TC1900000500.mm.2	Ifit2	1.01348	1.54969e-07	7.64868e-09	TRUE	UP
TC1700001265.mm.2	Abcg8	2.21245	1.5741e-07	7.77624e-09	TRUE	UP
TC1600000861.mm.2	Usp25	0.6575	1.57675e-07	7.79641e-09	TRUE	UP
TC0900002451.mm.2	Kif23	1.04601	1.57768e-07	7.8081e-09	TRUE	UP
TC0100002993.mm.2	Actr3	0.703949	1.59527e-07	7.90953e-09	TRUE	UP
TC1000002647.mm.2	Spic	1.74694	1.62759e-07	8.08447e-09	TRUE	UP
TC1100002497.mm.2	Dock2	1.23732	1.64852e-07	8.21066e-09	TRUE	UP
TC0700002999.mm.2	Cd37	1.81272	1.67876e-07	8.37296e-09	TRUE	UP
TC0200005150.mm.2	Slc13a3	0.950833	1.67876e-07	8.37643e-09	TRUE	UP
TC0400003271.mm.2	Cdkn2c	0.797283	1.79911e-07	9.01755e-09	TRUE	UP
TC0600001398.mm.2	Clec4a3	1.51775	1.83929e-07	9.24368e-09	TRUE	UP
TC1700002788.mm.2	H2-Q8; H2-Q6	0.973243	1.87459e-07	9.42951e-09	TRUE	UP
TC1500001963.mm.2	Nfam1	1.24406	1.89495e-07	9.54043e-09	TRUE	UP
TC0900000753.mm.2	Myo9a	1.28351	1.97647e-07	9.9598e-09	TRUE	UP
TC0700003946.mm.2	Trim30d	1.22565	2.02712e-07	1.02424e-08	TRUE	UP
TC0100002314.mm.2	Gls	0.679112	2.06278e-07	1.04319e-08	TRUE	UP
TC1900001498.mm.2	Blnk	1.39906	2.16906e-07	1.10182e-08	TRUE	UP
TC1200001797.mm.2	Slc25a21	0.933895	2.18453e-07	1.11066e-08	TRUE	UP
TC1500001656.mm.2	Sla	1.30984	2.29081e-07	1.16676e-08	TRUE	UP
TC0100002967.mm.2	Marco	1.97882	2.35567e-07	1.20192e-08	TRUE	UP
TC0900001483.mm.2	Lrrfip2	0.772337	2.36828e-07	1.20942e-08	TRUE	UP
TC0500003061.mm.2	Mmab	0.792681	2.46865e-07	1.26289e-08	TRUE	UP
TC1800001402.mm.2	Synpo	0.861033	2.56525e-07	1.31462e-08	TRUE	UP
TC0900000751.mm.2	Pkm	1.32741	2.56669e-07	1.31652e-08	TRUE	UP
TC0300003106.mm.2	Prkacb	0.593822	2.57009e-07	1.32058e-08	TRUE	UP
TC0800002503.mm.2	Tmem184c	0.765018	2.57437e-07	1.32393e-08	TRUE	UP
TC0300002718.mm.2	Csf1	1.45464	2.65409e-07	1.37211e-08	TRUE	UP
TC1300000157.mm.2	Aoah	1.13444	2.68695e-07	1.39151e-08	TRUE	UP
TC0300000769.mm.2	Adar	0.929511	2.95912e-07	1.53779e-08	TRUE	UP
TC0800002429.mm.2	Plvap	0.987446	3.02135e-07	1.57149e-08	TRUE	UP
TC0800001420.mm.2	Osgin1	1.79866	3.13978e-07	1.64158e-08	TRUE	UP
TC0700003857.mm.2	Rhog	0.962917	3.14362e-07	1.645e-08	TRUE	UP
TC0400004216.mm.2	Podn	0.946685	3.23062e-07	1.69343e-08	TRUE	UP
TC1400001436.mm.2	Pdhb	0.800525	3.48948e-07	1.83698e-08	TRUE	UP
TC1200002518.mm.2	Asap2	1.8994	3.49437e-07	1.84113e-08	TRUE	UP
TC0700000444.mm.2	Cyp2g1	1.24118	3.51603e-07	1.85413e-08	TRUE	UP
TC0900002533.mm.2	Rab8b	0.938478	3.61175e-07	1.90623e-08	TRUE	UP
TC0700000886.mm.2	Tmem86a	0.889656	3.80048e-07	2.01439e-08	TRUE	UP
TC1700001993.mm.2	H2-T24	0.740888	3.80473e-07	2.01836e-08	TRUE	UP
TC0700001321.mm.2	Prcp	0.706069	3.8369e-07	2.03715e-08	TRUE	UP
TC0100003035.mm.2	Cd55b	0.927844	3.94612e-07	2.09779e-08	TRUE	UP
TC0500003043.mm.2	Cmklr1	1.06072	3.94612e-07	2.0987e-08	TRUE	UP
TC0700001841.mm.2	Itgal	1.11444	4.02126e-07	2.14047e-08	TRUE	UP
TC0700000285.mm.2	Dmpk	0.864547	4.09139e-07	2.17964e-08	TRUE	UP
TC0300001521.mm.2	Adgrl4	0.841612	4.13475e-07	2.2046e-08	TRUE	UP
TC1700001938.mm.2	D17H6S56E-5	2.01848	4.19382e-07	2.23799e-08	TRUE	UP
TC0400003200.mm.2	Pcsk9	1.02489	4.23151e-07	2.26026e-08	TRUE	UP
TC0900001103.mm.2	Bckdhb	0.613297	4.25758e-07	2.27968e-08	TRUE	UP
TC1400002067.mm.2	Slc7a8	1.48942	4.28426e-07	2.29783e-08	TRUE	UP
TC1700001986.mm.2	Atat1	0.949638	4.29555e-07	2.30582e-08	TRUE	UP
TC0500001992.mm.2	Cd36	1.08275	4.48805e-07	2.41925e-08	TRUE	UP
TC0300000925.mm.2	Mtmr11	0.93587	4.49817e-07	2.42674e-08	TRUE	UP
TC0200003280.mm.2	Tor1a	0.667591	4.73204e-07	2.55717e-08	TRUE	UP
TC1200001974.mm.2	Tmem229b	1.1527	4.84049e-07	2.62231e-08	TRUE	UP
TC0400000996.mm.2	Atg4c	0.782989	4.92624e-07	2.67543e-08	TRUE	UP
TC0400001276.mm.2	Ptch2	0.806721	4.98667e-07	2.71498e-08	TRUE	UP
TC0200002170.mm.2	Naa20	0.855543	5.10152e-07	2.78522e-08	TRUE	UP
TC0900001046.mm.2	Ick	0.872083	5.10362e-07	2.79015e-08	TRUE	UP
TC0500003731.mm.2	Gbp4	1.07748	5.11352e-07	2.79786e-08	TRUE	UP
TC0X00001625.mm.2	Sh3kbp1	1.10279	5.13704e-07	2.81304e-08	TRUE	UP
TC1100003037.mm.2	Chd3	0.687754	5.18647e-07	2.84378e-08	TRUE	UP
TC1200000098.mm.2	Fam49a	0.813732	5.18647e-07	2.84478e-08	TRUE	UP
TC1300001911.mm.2	Atxn1	1.39672	5.34747e-07	2.94272e-08	TRUE	UP
TC0100002656.mm.2	Dock10	1.0127	5.4752e-07	3.01794e-08	TRUE	UP
TC0600003264.mm.2	Klra2	1.1312	5.47885e-07	3.02242e-08	TRUE	UP
TC0300001006.mm.2	Vtcn1	1.25458	5.62569e-07	3.11517e-08	TRUE	UP
TC1700000685.mm.2	H2-Q5	0.920272	5.62569e-07	3.11609e-08	TRUE	UP
TC0X00002712.mm.2	Snx12	0.952953	5.74112e-07	3.18262e-08	TRUE	UP
TC0500003219.mm.2	Camkk2	0.837428	5.78119e-07	3.21004e-08	TRUE	UP
TC0X00002472.mm.2	F8	0.771685	6.09986e-07	3.39522e-08	TRUE	UP
TC0500002756.mm.2	Cxcl10	1.58036	6.15418e-07	3.42823e-08	TRUE	UP
TC1900001056.mm.2	Slc22a26	1.28368	6.23038e-07	3.47348e-08	TRUE	UP
TC0800000758.mm.2	Lrrc25	1.08745	6.3646e-07	3.55117e-08	TRUE	UP
TC0400000133.mm.2	Tmem64	0.683333	6.38596e-07	3.56597e-08	TRUE	UP
TC0500000527.mm.2	Sod3	1.15656	6.40872e-07	3.58273e-08	TRUE	UP
TC1000002930.mm.2	Lyz1	1.13672	6.40872e-07	3.58445e-08	TRUE	UP
TC1000001587.mm.2	Baz2a	0.991612	6.43965e-07	3.60465e-08	TRUE	UP
TC1600000529.mm.2	Hcls1	1.27174	6.51385e-07	3.64943e-08	TRUE	UP
TC1200000959.mm.2	Gpr65	1.20178	6.51385e-07	3.65205e-08	TRUE	UP
TC0900001459.mm.2	Scap	0.908605	6.70425e-07	3.77088e-08	TRUE	UP
TC0700002786.mm.2	Fxyd5; Mir7050	1.42444	6.83424e-07	3.85322e-08	TRUE	UP
TC1900001425.mm.2	Slc16a12	1.2004	6.8389e-07	3.85893e-08	TRUE	UP
TC1400000363.mm.2	Gdf10	1.27065	6.92854e-07	3.91814e-08	TRUE	UP
TC1500002200.mm.2	Tuba1a	0.90875	6.92854e-07	3.91887e-08	TRUE	UP
TC0100002285.mm.2	Slc40a1	0.989783	6.9317e-07	3.92378e-08	TRUE	UP
TC0X00003359.mm.2	Tlr8	1.03743	7.11274e-07	4.03587e-08	TRUE	UP
TC1100004266.mm.2	Irgm2	1.2804	7.19497e-07	4.08577e-08	TRUE	UP
TC0500003615.mm.2	Usp12	0.628786	7.53946e-07	4.28479e-08	TRUE	UP
TC1300000724.mm.2	Naa35	0.670507	7.5918e-07	4.31795e-08	TRUE	UP
TC0400000726.mm.2	6330416G13Rik	0.862572	7.68739e-07	4.37924e-08	TRUE	UP
TC0400003249.mm.2	Prpf38a	0.773478	7.81524e-07	4.46615e-08	TRUE	UP
TC0900002197.mm.2	Il10ra	0.937464	8.22255e-07	4.71743e-08	TRUE	UP
TC0100003422.mm.2	Atp1b1	0.789674	8.26658e-07	4.75014e-08	TRUE	UP
TC1900000504.mm.2	Ifit1	2.29328	8.30329e-07	4.77497e-08	TRUE	UP
TC0100001615.mm.2	Slamf9	0.993098	8.36043e-07	4.81506e-08	TRUE	UP
TC1200001761.mm.2	Gm2436	0.633931	8.36516e-07	4.82562e-08	TRUE	UP
TC1100001267.mm.2	Wfdc21	0.822428	8.43252e-07	4.87207e-08	TRUE	UP
TC0700003597.mm.2	Iqgap1	0.992156	8.57214e-07	4.9566e-08	TRUE	UP
TC0500001574.mm.2	Dnajc30	0.755688	8.93186e-07	5.16862e-08	TRUE	UP
TC1000001024.mm.2	Rfx4	2.06152	9.12809e-07	5.29039e-08	TRUE	UP
TC1100000343.mm.2	Stk10	1.12868	9.27556e-07	5.38004e-08	TRUE	UP
TC1300001922.mm.2	Kif13a	0.852446	9.36114e-07	5.4339e-08	TRUE	UP
TC0100001370.mm.2	Ncf2	1.35355	9.54651e-07	5.5501e-08	TRUE	UP
TC0600002978.mm.2	Rassf4	0.975942	9.55554e-07	5.55965e-08	TRUE	UP
TC1500000037.mm.2	Fyb	1.04288	9.6292e-07	5.60684e-08	TRUE	UP
TC0500003738.mm.2	Pcolce	1.15995	9.7328e-07	5.67155e-08	TRUE	UP
TC0500001038.mm.2	Lrrc8b	0.858551	9.76496e-07	5.69469e-08	TRUE	UP
TC0400000913.mm.2	Mtap	0.81096	9.78032e-07	5.70805e-08	TRUE	UP
TC1100001474.mm.2	Gngt2	0.825308	9.79035e-07	5.71831e-08	TRUE	UP
TC0500001043.mm.2	Lrrc8c	0.703007	1.01901e-06	5.96095e-08	TRUE	UP
TC1400001451.mm.2	Gm3839	0.583859	1.01968e-06	5.97384e-08	TRUE	UP
TC0200000572.mm.2	Pomt1	0.720652	1.01968e-06	5.97409e-08	TRUE	UP
TC1200002203.mm.2	Foxn3	0.818714	1.03753e-06	6.08798e-08	TRUE	UP
TC1900001137.mm.2	Ms4a6d	1.18851	1.03891e-06	6.10077e-08	TRUE	UP
TC0X00000388.mm.2	Gria3	1.2192	1.04129e-06	6.11943e-08	TRUE	UP
TC0700004003.mm.2	Gm18853	1.47058	1.04293e-06	6.14046e-08	TRUE	UP
TC0400000743.mm.2	Tlr4	0.872917	1.04293e-06	6.14317e-08	TRUE	UP
TC0900002541.mm.2	Tpm1	0.848678	1.11006e-06	6.56857e-08	TRUE	UP
TC1000000733.mm.2	Zfp280b	0.945616	1.11769e-06	6.62382e-08	TRUE	UP
TC1200000419.mm.2	Ap4s1	0.629438	1.15344e-06	6.84603e-08	TRUE	UP
TC1000000653.mm.2	Tmem26	0.929964	1.17489e-06	6.97864e-08	TRUE	UP
TC0700004632.mm.2	Gm15922; Pira1	1.15351	1.18849e-06	7.07659e-08	TRUE	UP
TC0900002613.mm.2	Tcf12	0.697101	1.21679e-06	7.26587e-08	TRUE	UP
TC0200003051.mm.2	Pip4k2a	0.757355	1.21743e-06	7.2752e-08	TRUE	UP
TC1300002474.mm.2	Hmgcr	2.01995	1.22137e-06	7.30974e-08	TRUE	UP
TC1000001366.mm.2	Cpm	0.885924	1.26893e-06	7.61151e-08	TRUE	UP
TC1900001479.mm.2	Cyp2c40	1.92643	1.28809e-06	7.73804e-08	TRUE	UP
TC1500002313.mm.2	Nfe2	1.19031	1.29608e-06	7.79191e-08	TRUE	UP
TC1000000465.mm.2	Dcbld1	0.670326	1.31259e-06	7.89706e-08	TRUE	UP
TC0700001098.mm.2	Klhl25	0.989692	1.31278e-06	7.90412e-08	TRUE	UP
TC0800000814.mm.2	Tpm4	0.800127	1.32717e-06	7.99672e-08	TRUE	UP
TC0900001182.mm.2	Slc9a9	0.828351	1.36448e-06	8.23381e-08	TRUE	UP
TC1800001197.mm.2	Cd14	1.57239	1.38754e-06	8.37924e-08	TRUE	UP
TC0600003335.mm.2	Mgp	1.01788	1.43664e-06	8.69516e-08	TRUE	UP
TC1800000617.mm.2	Cd74; Mir5107	1.21179	1.43666e-06	8.70174e-08	TRUE	UP
TC1100001661.mm.2	Tmem106a	0.731884	1.45005e-06	8.80242e-08	TRUE	UP
TC1200000253.mm.2	Pxdn	0.779764	1.47941e-06	9.00732e-08	TRUE	UP
TC0200001226.mm.2	Slc43a3	0.679239	1.48853e-06	9.06955e-08	TRUE	UP
TC0100003590.mm.2	BC094916	1.14237	1.49408e-06	9.11007e-08	TRUE	UP
TC0300002972.mm.2	Npnt	1.00475	1.50094e-06	9.15869e-08	TRUE	UP
TC1900000118.mm.2	Rasgrp2	0.722011	1.51825e-06	9.27114e-08	TRUE	UP
TC0X00002161.mm.2	Elf4	1.08663	1.54341e-06	9.43867e-08	TRUE	UP
TC0900001616.mm.2	Trak1	0.736033	1.54383e-06	9.44819e-08	TRUE	UP
TC0900002870.mm.2	Pls1	0.851341	1.56515e-06	9.59193e-08	TRUE	UP
TC1900000217.mm.2	Ms4a4c	1.68451	1.57385e-06	9.66026e-08	TRUE	UP
TC0200004396.mm.2	Rasgrp1	1.04513	1.59276e-06	9.7907e-08	TRUE	UP
TC0200003866.mm.2	Tfpi	0.7	1.5959e-06	9.81714e-08	TRUE	UP
TC1100003379.mm.2	Slfn9	0.962391	1.63352e-06	1.00639e-07	TRUE	UP
TC0900000365.mm.2	Robo4	0.629964	1.63352e-06	1.00706e-07	TRUE	UP
TC0100000334.mm.2	Ercc5	0.766975	1.6437e-06	1.01408e-07	TRUE	UP
TC0100001356.mm.2	Fam129a	0.821341	1.70727e-06	1.05638e-07	TRUE	UP
TC1000001947.mm.2	Ncoa7	0.636413	1.72275e-06	1.06751e-07	TRUE	UP
TC0500000926.mm.2	Fras1	0.857572	1.74451e-06	1.08177e-07	TRUE	UP
TC0700001756.mm.2	Prkcb	1.11067	1.77354e-06	1.10217e-07	TRUE	UP
TC0100001387.mm.2	Glul; Mir8114	0.655924	1.78332e-06	1.10905e-07	TRUE	UP
TC1200002263.mm.2	Asb2	0.940906	1.84021e-06	1.14692e-07	TRUE	UP
TC0X00000916.mm.2	Msn	0.805978	1.86843e-06	1.16619e-07	TRUE	UP
TC0X00001069.mm.2	Tlr13	1.4365	1.87192e-06	1.16921e-07	TRUE	UP
TC1900000646.mm.2	Scd2; Mir5114	1.2102	1.88882e-06	1.18147e-07	TRUE	UP
TC1900000221.mm.2	Ms4a6c	1.19833	1.92984e-06	1.20974e-07	TRUE	UP
TC0600002684.mm.2	Kbtbd12	0.844221	1.96397e-06	1.23201e-07	TRUE	UP
TC1700002804.mm.2	Pigq	0.856594	1.98217e-06	1.24432e-07	TRUE	UP
TC1300000612.mm.2	Syk	0.899547	1.99484e-06	1.25317e-07	TRUE	UP
TC0100001252.mm.2	Csrp1	1.09036	2.04424e-06	1.28605e-07	TRUE	UP
TC1400000316.mm.2	Mustn1	1.17757	2.05108e-06	1.29128e-07	TRUE	UP
TC0300002054.mm.2	P2ry12	1.06645	2.06908e-06	1.30354e-07	TRUE	UP
TC0100001397.mm.2	Stx6	0.796721	2.08293e-06	1.31361e-07	TRUE	UP
TC0X00002158.mm.2	Zdhhc9	0.617047	2.08381e-06	1.31563e-07	TRUE	UP
TC1100003097.mm.2	Cxcl16	0.9425	2.09583e-06	1.32417e-07	TRUE	UP
TC0200005290.mm.2	Zbp1	1.18141	2.13702e-06	1.35212e-07	TRUE	UP
TC1600001604.mm.2	Pla1a	0.607446	2.18837e-06	1.38559e-07	TRUE	UP
TC0400004177.mm.2	Akap2	0.844257	2.22654e-06	1.41277e-07	TRUE	UP
TC0600002422.mm.2	Gadd45a	0.915761	2.25867e-06	1.4362e-07	TRUE	UP
TC1900001774.mm.2	Lipo1	0.91183	2.2677e-06	1.44297e-07	TRUE	UP
TC0700001116.mm.2	Isg20	0.98413	2.28696e-06	1.45789e-07	TRUE	UP
TC1600002110.mm.2	Cldn14	0.987518	2.28696e-06	1.45832e-07	TRUE	UP
TC1700000513.mm.2	Zfand3	0.648478	2.29554e-06	1.46586e-07	TRUE	UP
TC0700000402.mm.2	Cd79a	1.51768	2.34552e-06	1.49882e-07	TRUE	UP
TC0100001510.mm.2	Dpt	1.40341	2.36031e-06	1.5104e-07	TRUE	UP
TC0900003125.mm.2	Ccrl2	0.952192	2.39412e-06	1.53419e-07	TRUE	UP
TC1500002247.mm.2	Bin2	1.2619	2.41491e-06	1.54969e-07	TRUE	UP
TC1900000441.mm.2	Cd274	1.19482	2.41518e-06	1.55095e-07	TRUE	UP
TC1000002878.mm.2	Glipr1	1.02406	2.46173e-06	1.58196e-07	TRUE	UP
TC0700001520.mm.2	Trim34b; Trim34a	1.04964	2.51046e-06	1.61553e-07	TRUE	UP
TC0900000046.mm.2	Mmp12	2.25109	2.54007e-06	1.63687e-07	TRUE	UP
TC0100003443.mm.2	Dcaf6	1.11888	2.61161e-06	1.6865e-07	TRUE	UP
TC1400000501.mm.2	Cdkn3	0.997591	2.63588e-06	1.70336e-07	TRUE	UP
TC0500000349.mm.2	Ywhah	0.798351	2.69371e-06	1.74316e-07	TRUE	UP
TC1700000835.mm.2	Pla2g7	1.24565	2.73013e-06	1.76796e-07	TRUE	UP
TC0600001397.mm.2	Clec4a1	1.14054	2.74543e-06	1.78034e-07	TRUE	UP
TC1100002783.mm.2	Sparc	1.02297	2.76434e-06	1.79509e-07	TRUE	UP
TC0200001998.mm.2	Atrn	0.671793	2.78723e-06	1.81247e-07	TRUE	UP
TC0500003095.mm.2	Dynll1	1.07139	2.79166e-06	1.8166e-07	TRUE	UP
TC1700000418.mm.2	Atp6v0e	0.631214	2.84029e-06	1.85209e-07	TRUE	UP
TC0200003698.mm.2	Abcb11	0.910616	2.85877e-06	1.86542e-07	TRUE	UP
TC0100003524.mm.2	Fcgr3	0.902246	2.91074e-06	1.90196e-07	TRUE	UP
TC0900001425.mm.2	Slc26a6	0.763623	2.9312e-06	1.91665e-07	TRUE	UP
TC0300000528.mm.2	Tiparp	0.929022	3.00516e-06	1.96636e-07	TRUE	UP
TC1300001777.mm.2	Serpinb6a	0.756504	3.00523e-06	1.96776e-07	TRUE	UP
TC1700000765.mm.2	H2-M3	0.886721	3.02472e-06	1.98325e-07	TRUE	UP
TC1500001729.mm.2	Ly6c1	1.92098	3.05439e-06	2.00545e-07	TRUE	UP
TC0400003653.mm.2	Epb41	0.865272	3.19973e-06	2.10664e-07	TRUE	UP
TC1400002161.mm.2	Phf11a	0.890163	3.25468e-06	2.14575e-07	TRUE	UP
TC1000002420.mm.2	Adarb1	0.871667	3.31467e-06	2.18679e-07	TRUE	UP
TC0100001176.mm.2	Slc41a1	0.942065	3.33797e-06	2.20367e-07	TRUE	UP
TC0800002842.mm.2	Psmb10	0.962373	3.38015e-06	2.23456e-07	TRUE	UP
TC1200000145.mm.2	Hpcal1	0.736812	3.39194e-06	2.24388e-07	TRUE	UP
TC1300001562.mm.2	Hist1h2an	0.858931	3.40167e-06	2.25185e-07	TRUE	UP
TC0300003013.mm.2	Dapp1	1.07922	3.48151e-06	2.30783e-07	TRUE	UP
TC1200002411.mm.2	Ckb	0.634475	3.53741e-06	2.34808e-07	TRUE	UP
TC0700003936.mm.2	Trim5	0.910036	3.61608e-06	2.40518e-07	TRUE	UP
TC1100000442.mm.2	Ebf1	0.975308	3.71453e-06	2.47569e-07	TRUE	UP
TC0300002982.mm.2	Tet2	0.922862	3.71595e-06	2.47921e-07	TRUE	UP
TC0X00000685.mm.2	Bgn	0.792772	3.71943e-06	2.48565e-07	TRUE	UP
TC0400002151.mm.2	Cyp7a1	1.91868	3.73045e-06	2.4947e-07	TRUE	UP
TC0300000060.mm.2	Fabp5	2.26053	3.75578e-06	2.51502e-07	TRUE	UP
TC1400002632.mm.2	Kctd12; Mir5130	0.849909	3.78454e-06	2.53598e-07	TRUE	UP
TC0900000031.mm.2	Casp1	0.81692	3.87296e-06	2.60046e-07	TRUE	UP
TC0900002778.mm.2	Gm17530	3.0217	3.97736e-06	2.67414e-07	TRUE	UP
TC1000000171.mm.2	Sgk1	1.20803	3.99805e-06	2.68985e-07	TRUE	UP
TC1600000305.mm.2	Map3k13	1.28161	4.18437e-06	2.82086e-07	TRUE	UP
TC1300001140.mm.2	Ccdc125	0.818188	4.24028e-06	2.86046e-07	TRUE	UP
TC1900001428.mm.2	Pank1	0.694221	4.26794e-06	2.88297e-07	TRUE	UP
TC1700001381.mm.2	Dynlt1a	0.629656	4.32166e-06	2.92704e-07	TRUE	UP
TC0600001648.mm.2	Pik3c2g	0.718605	4.36321e-06	2.95911e-07	TRUE	UP
TC1100001276.mm.2	Acaca	1.55326	4.37888e-06	2.97171e-07	TRUE	UP
TC1300001006.mm.2	Hapln1	1.92877	4.39262e-06	2.98499e-07	TRUE	UP
TC1000002036.mm.2	Slc16a10	0.785453	4.53948e-06	3.09705e-07	TRUE	UP
TC0200001866.mm.2	Sema6d	0.677935	4.57687e-06	3.12462e-07	TRUE	UP
TC1700002782.mm.2	H2-Eb1	1.02254	4.57771e-06	3.12726e-07	TRUE	UP
TC0300002504.mm.2	Hist2h4	0.664601	4.65821e-06	3.18645e-07	TRUE	UP
TC0500002596.mm.2	Sgcb	0.762482	4.66503e-06	3.19532e-07	TRUE	UP
TC1800000163.mm.2	Rnf138	0.589257	4.69022e-06	3.21468e-07	TRUE	UP
TC1100002550.mm.2	Ccng1	0.642319	4.72692e-06	3.24622e-07	TRUE	UP
TC0500003050.mm.2	Selplg	1.00819	4.76088e-06	3.27383e-07	TRUE	UP
TC1700000621.mm.2	Tap1	0.886757	4.86647e-06	3.34863e-07	TRUE	UP
TC0700003829.mm.2	P2ry6	0.654004	4.99847e-06	3.44846e-07	TRUE	UP
TC1600001134.mm.2	Coro7	0.590942	5.11374e-06	3.5326e-07	TRUE	UP
TC0900001635.mm.2	Snrk	0.895725	5.13425e-06	3.54908e-07	TRUE	UP
TC0200004196.mm.2	Gm10800	1.41524	5.17776e-06	3.58148e-07	TRUE	UP
TC0100003871.mm.2	Tstd1	1.00971	5.23672e-06	3.62934e-07	TRUE	UP
TC1300002076.mm.2	Tifab	0.726087	5.28819e-06	3.67454e-07	TRUE	UP
TC1100003115.mm.2	Scimp	0.890453	5.50882e-06	3.83528e-07	TRUE	UP
TC1200002270.mm.2	Ifi27l2b	1.43944	5.56523e-06	3.87707e-07	TRUE	UP
TC0100003258.mm.2	1700025G04Rik	0.839982	5.6974e-06	3.97171e-07	TRUE	UP
TC1800001655.mm.2	Hsbp1l1	1.02322	5.70597e-06	3.98045e-07	TRUE	UP
TC0900002529.mm.2	Aph1b	0.881739	5.71176e-06	3.98944e-07	TRUE	UP
TC0900001987.mm.2	Fli1	0.948025	5.80569e-06	4.05766e-07	TRUE	UP
TC1600001349.mm.2	Alg3	0.635562	5.88626e-06	4.11941e-07	TRUE	UP
TC0200001959.mm.2	Sirpa	1.17429	5.92624e-06	4.15258e-07	TRUE	UP
TC0300002994.mm.2	Nfkb1	0.705942	6.02135e-06	4.22736e-07	TRUE	UP
TC1800000184.mm.2	Mapre2	0.90192	6.14736e-06	4.32002e-07	TRUE	UP
TC0700003710.mm.2	Tmem135	0.73808	6.14971e-06	4.32579e-07	TRUE	UP
TC1500000725.mm.2	Aco2	0.766685	6.17171e-06	4.34682e-07	TRUE	UP
TC0600003169.mm.2	Ccnd2	0.736431	6.31205e-06	4.45158e-07	TRUE	UP
TC1500000554.mm.2	BC025446	0.618478	6.3489e-06	4.48831e-07	TRUE	UP
TC1100003466.mm.2	Gdpd1	1.07179	6.41638e-06	4.53937e-07	TRUE	UP
TC1500000640.mm.2	Ncf4	0.946938	6.47332e-06	4.59132e-07	TRUE	UP
TC1100001451.mm.2	Ppp1r9b	0.80087	6.55553e-06	4.65553e-07	TRUE	UP
TC1200001552.mm.2	Rsad2	1.51813	6.60459e-06	4.6992e-07	TRUE	UP
TC0400000720.mm.2	Orm3	2.42145	6.60459e-06	4.69929e-07	TRUE	UP
TC0700002970.mm.2	Nr1h2	0.676105	6.64683e-06	4.73234e-07	TRUE	UP
TC0200003151.mm.2	Ptgds	1.47723	6.67156e-06	4.75596e-07	TRUE	UP
TC0800002188.mm.2	Tenm3	0.698351	6.82218e-06	4.86947e-07	TRUE	UP
TC1300001395.mm.2	Pfkp	0.700163	6.94768e-06	4.96531e-07	TRUE	UP
TC1100003600.mm.2	Abi3	0.835815	6.97288e-06	4.98646e-07	TRUE	UP
TC0X00000424.mm.2	Ocrl	0.764312	7.03378e-06	5.03952e-07	TRUE	UP
TC1300002541.mm.2	Mrps36	0.669022	7.04819e-06	5.05619e-07	TRUE	UP
TC1900001342.mm.2	Plgrkt	1.0154	7.19057e-06	5.17128e-07	TRUE	UP
TC1900000246.mm.2	Mpeg1	1.37784	7.29873e-06	5.25235e-07	TRUE	UP
TC1000000778.mm.2	Icosl	0.852319	7.41294e-06	5.34122e-07	TRUE	UP
TC1000002253.mm.2	Tspan15	0.581123	7.81985e-06	5.65906e-07	TRUE	UP
TC1400000246.mm.2	Ppif	0.941667	8.00839e-06	5.79911e-07	TRUE	UP
TC1100004233.mm.2	Fasn	2.20368	8.26452e-06	6.00318e-07	TRUE	UP
TC0200001158.mm.2	Itga4	0.840489	8.30499e-06	6.03632e-07	TRUE	UP
TC0800002146.mm.2	Tlr3	0.916051	8.49867e-06	6.18475e-07	TRUE	UP
TC1500001131.mm.2	Nckap1l	1.08908	8.54907e-06	6.22528e-07	TRUE	UP
TC0X00002247.mm.2	Xlr	0.948931	8.55422e-06	6.23288e-07	TRUE	UP
TC0100000822.mm.2	Inpp5d	0.889873	8.73072e-06	6.36541e-07	TRUE	UP
TC0200000636.mm.2	Gsn	1.03683	8.8264e-06	6.44312e-07	TRUE	UP
TC1000000402.mm.2	Cd24a	0.856087	9.12882e-06	6.67622e-07	TRUE	UP
TC0100001496.mm.2	Sell	1.81596	9.13439e-06	6.6844e-07	TRUE	UP
TC0900002770.mm.2	Fam46a	0.833496	9.34986e-06	6.8505e-07	TRUE	UP
TC0600003139.mm.2	Tapbpl	0.651051	9.4806e-06	6.95483e-07	TRUE	UP
TC0100003037.mm.2	Cd55	0.675833	9.51093e-06	6.98136e-07	TRUE	UP
TC0500003175.mm.2	Oas2	0.962627	9.55408e-06	7.01734e-07	TRUE	UP
TC1700000625.mm.2	H2-Ob	1.16596	9.62552e-06	7.08282e-07	TRUE	UP
TC1000003122.mm.2	Gpr182	0.687264	9.85734e-06	7.26228e-07	TRUE	UP
TC0400000349.mm.2	Dnaja1; Mir207	0.770978	9.87483e-06	7.27961e-07	TRUE	UP
TC0200004511.mm.2	Gatm	0.738333	1.02955e-05	7.61291e-07	TRUE	UP
TC1800000286.mm.2	Pkd2l2	0.814257	1.03384e-05	7.65226e-07	TRUE	UP
TC1400002834.mm.2	Irf9	0.869402	1.04775e-05	7.7805e-07	TRUE	UP
TC1100002575.mm.2	Adra1b	0.92087	1.08998e-05	8.12843e-07	TRUE	UP
TC1100000614.mm.2	Irf1	0.666304	1.09203e-05	8.14864e-07	TRUE	UP
TC1100000134.mm.2	Ikzf1	0.732609	1.09959e-05	8.21002e-07	TRUE	UP
TC1400001988.mm.2	Tep1	0.733623	1.09979e-05	8.21651e-07	TRUE	UP
TC1400002430.mm.2	Slc25a30	2.1023	1.10971e-05	8.30057e-07	TRUE	UP
TC1900001506.mm.2	Pik3ap1	1.01413	1.11533e-05	8.35264e-07	TRUE	UP
TC1900000255.mm.2	Lpxn	0.833514	1.12776e-05	8.45594e-07	TRUE	UP
TC1800000741.mm.2	Tcf4	0.836993	1.13717e-05	8.54181e-07	TRUE	UP
TC1700000061.mm.2	Dynlt1c; Dynlt1f	0.650399	1.1656e-05	8.76065e-07	TRUE	UP
TC0200005030.mm.2	Tgm2	1.05516	1.17215e-05	8.81514e-07	TRUE	UP
TC0X00001922.mm.2	Slc9a7	0.791594	1.17764e-05	8.86297e-07	TRUE	UP
TC1000002164.mm.2	Cep85l	0.841395	1.19474e-05	9.00987e-07	TRUE	UP
TC0900001005.mm.2	Fam214a	1.11438	1.19474e-05	9.01196e-07	TRUE	UP
TC1900000916.mm.2	Adrbk1	0.61788	1.21986e-05	9.20688e-07	TRUE	UP
TC1200000200.mm.2	Grhl1	0.639094	1.22207e-05	9.23275e-07	TRUE	UP
TC0900002875.mm.2	Atp1b3	0.65058	1.22481e-05	9.27184e-07	TRUE	UP
TC0300001610.mm.2	Il7	1.11645	1.23521e-05	9.35612e-07	TRUE	UP
TC0800001867.mm.2	Slc25a15	0.588587	1.25502e-05	9.53443e-07	TRUE	UP
TC0900001430.mm.2	Pfkfb4	1.03853	1.26633e-05	9.62607e-07	TRUE	UP
TC1300001868.mm.2	Adtrp	0.635797	1.26969e-05	9.66308e-07	TRUE	UP
TC1400001872.mm.2	Ear10	0.832228	1.28264e-05	9.77314e-07	TRUE	UP
TC0200000741.mm.2	Arhgap15	1.20538	1.29775e-05	9.89998e-07	TRUE	UP
TC0800001511.mm.2	Dpep1	0.753351	1.3105e-05	1.00031e-06	TRUE	UP
TC0600000277.mm.2	Mest	1.20034	1.38792e-05	1.06378e-06	TRUE	UP
TC1900001030.mm.2	Fermt3	1.11109	1.40708e-05	1.07974e-06	TRUE	UP
TC0300002492.mm.2	Plekho1	0.834982	1.40971e-05	1.08239e-06	TRUE	UP
TC1600002148.mm.2	Mx1	1.14721	1.41252e-05	1.08582e-06	TRUE	UP
TC1200001490.mm.2	Adam17	0.62817	1.43171e-05	1.10186e-06	TRUE	UP
TC0400003417.mm.2	Zfp691	0.862989	1.47538e-05	1.1415e-06	TRUE	UP
TC1800000704.mm.2	Tubb6	1.09005	1.47538e-05	1.14278e-06	TRUE	UP
TC0700002078.mm.2	Lsp1	0.834565	1.50212e-05	1.16687e-06	TRUE	UP
TC0400000018.mm.2	Chchd7	0.625344	1.54e-05	1.19907e-06	TRUE	UP
TC1900000572.mm.2	Entpd1	0.673986	1.54583e-05	1.20431e-06	TRUE	UP
TC1200002507.mm.2	Sp4	0.849819	1.5535e-05	1.21238e-06	TRUE	UP
TC1800001595.mm.2	Lipg	1.4023	1.56527e-05	1.22298e-06	TRUE	UP
TC1100003779.mm.2	Dhx58	1.18531	1.57775e-05	1.23344e-06	TRUE	UP
TC0700003517.mm.2	Slco3a1	0.806721	1.58345e-05	1.23868e-06	TRUE	UP
TC1000001190.mm.2	Lum	1.16591	1.58345e-05	1.23932e-06	TRUE	UP
TC0700000972.mm.2	E030018B13Rik	2.15774	1.62706e-05	1.27785e-06	TRUE	UP
TC1100004217.mm.2	Arhgdia	0.634402	1.62824e-05	1.27951e-06	TRUE	UP
TC0800001572.mm.2	Kcnk1	0.978696	1.63242e-05	1.28453e-06	TRUE	UP
TC0900002532.mm.2	Aph1c	0.820707	1.63242e-05	1.285e-06	TRUE	UP
TC1700002438.mm.2	Ptprm	0.808569	1.64738e-05	1.29751e-06	TRUE	UP
TC0400001715.mm.2	Eif4g3	0.634438	1.65886e-05	1.30731e-06	TRUE	UP
TC1900000247.mm.2	Fam111a	0.828388	1.70271e-05	1.34263e-06	TRUE	UP
TC0300001850.mm.2	Anxa5	0.672138	1.72291e-05	1.36088e-06	TRUE	UP
TC1500002141.mm.2	Slc38a1	0.90788	1.75403e-05	1.38942e-06	TRUE	UP
TC0800002819.mm.2	Fhod1	0.737953	1.77361e-05	1.40572e-06	TRUE	UP
TC1100002374.mm.2	Rel	0.694909	1.77466e-05	1.40736e-06	TRUE	UP
TC1100000383.mm.2	Pank3	0.611576	1.7945e-05	1.42632e-06	TRUE	UP
TC0800003031.mm.2	Cotl1	0.734293	1.82759e-05	1.45344e-06	TRUE	UP
TC0500003000.mm.2	Ulk1	1.29393	1.97142e-05	1.57322e-06	TRUE	UP
TC1200001302.mm.2	Esyt2	0.583279	1.99962e-05	1.60017e-06	TRUE	UP
TC0700000439.mm.2	Cyp2a4	1.87598	2.08584e-05	1.67198e-06	TRUE	UP
TC0X00002826.mm.2	Taf9b	0.580054	2.10735e-05	1.69017e-06	TRUE	UP
TC0X00002447.mm.2	Flna	0.987772	2.15578e-05	1.73193e-06	TRUE	UP
TC0100002969.mm.2	Insig2	1.86373	2.17789e-05	1.75263e-06	TRUE	UP
TC0900002212.mm.2	Tagln	0.971395	2.18931e-05	1.76379e-06	TRUE	UP
TC1600002177.mm.2	Dexi	0.917826	2.20367e-05	1.77734e-06	TRUE	UP
TC0500001572.mm.2	Abhd11	0.658587	2.30603e-05	1.87028e-06	TRUE	UP
TC1400002106.mm.2	Sdr39u1	0.650598	2.30809e-05	1.87404e-06	TRUE	UP
TC0200002532.mm.2	Ube2c	1.38315	2.33034e-05	1.8963e-06	TRUE	UP
TC0800001244.mm.2	Pla2g15	0.76471	2.34208e-05	1.90902e-06	TRUE	UP
TC0100003804.mm.2	Atf3	0.949601	2.3598e-05	1.92665e-06	TRUE	UP
TC1100003687.mm.2	Med24	0.750109	2.45235e-05	2.00773e-06	TRUE	UP
TC1000000834.mm.2	Cnn2	0.682065	2.49991e-05	2.0504e-06	TRUE	UP
TC1100003932.mm.2	Pecam1	0.725851	2.50278e-05	2.05466e-06	TRUE	UP
TC0400001603.mm.2	Wasf2	0.690634	2.56563e-05	2.11087e-06	TRUE	UP
TC0800001207.mm.2	D230025D16Rik	1.00328	2.60059e-05	2.14432e-06	TRUE	UP
TC1300000240.mm.2	Hist1h2ad; Hist1h3b; Hist1h3d	0.821703	2.66311e-05	2.20187e-06	TRUE	UP
TC1900000226.mm.2	Ms4a4d	0.80625	2.67982e-05	2.21689e-06	TRUE	UP
TC1000000508.mm.2	Fabp7	1.14973	2.68293e-05	2.22067e-06	TRUE	UP
TC1500001300.mm.2	Fam105a	0.851178	2.73267e-05	2.269e-06	TRUE	UP
TC0100003233.mm.2	Pla2g4a	0.931232	2.85284e-05	2.38315e-06	TRUE	UP
TC1900001355.mm.2	Gldc	1.07768	2.90577e-05	2.42867e-06	TRUE	UP
TC0700001630.mm.2	Adm	0.946558	2.90584e-05	2.43004e-06	TRUE	UP
TC0700000583.mm.2	Fam187b	0.83462	2.9257e-05	2.44797e-06	TRUE	UP
TC0100001590.mm.2	Arhgap30	0.835616	2.98021e-05	2.49492e-06	TRUE	UP
TC1200000089.mm.2	Smc6	0.604457	3.0559e-05	2.5659e-06	TRUE	UP
TC1200000865.mm.2	Cipc	0.669094	3.0559e-05	2.56654e-06	TRUE	UP
TC0200001849.mm.2	Slc28a2	0.636775	3.12157e-05	2.62872e-06	TRUE	UP
TC0200004959.mm.2	Ncoa6	0.591033	3.18299e-05	2.68331e-06	TRUE	UP
TC1100004054.mm.2	AF251705	0.753551	3.27824e-05	2.77247e-06	TRUE	UP
TC0400002603.mm.2	Coro2a	0.847337	3.28267e-05	2.77769e-06	TRUE	UP
TC0700003013.mm.2	Fgf21	2.34464	3.35058e-05	2.83968e-06	TRUE	UP
TC0900001722.mm.2	Birc3	0.76817	3.42873e-05	2.90746e-06	TRUE	UP
TC0900000032.mm.2	Casp4	0.771268	3.594e-05	3.05569e-06	TRUE	UP
TC0300002114.mm.2	Rarres1	1.05857	3.60952e-05	3.07051e-06	TRUE	UP
TC0800000526.mm.2	Lrp2bp	1.2412	3.67028e-05	3.12386e-06	TRUE	UP
TC0500002480.mm.2	Tlr1	1.20342	3.68057e-05	3.13427e-06	TRUE	UP
TC0500002046.mm.2	AI506816	0.830326	3.69343e-05	3.14688e-06	TRUE	UP
TC0700002414.mm.2	Sepw1	0.595163	3.72515e-05	3.17559e-06	TRUE	UP
TC1700001714.mm.2	Bak1	0.864348	3.90039e-05	3.33551e-06	TRUE	UP
TC1100002249.mm.2	Plek	1.03917	3.91963e-05	3.3555e-06	TRUE	UP
TC0200000969.mm.2	B3galt1	1.9115	3.94452e-05	3.38035e-06	TRUE	UP
TC0500003026.mm.2	Crybb3	0.914891	3.99449e-05	3.42678e-06	TRUE	UP
TC1100003920.mm.2	Cd79b	1.00542	4.02726e-05	3.45852e-06	TRUE	UP
TC0700004652.mm.2	Snrpn; Snurf	0.664565	4.06515e-05	3.49289e-06	TRUE	UP
TC1000003214.mm.2	Lilrb4a	1.05167	4.07111e-05	3.49984e-06	TRUE	UP
TC1400002103.mm.2	Ripk3	0.807428	4.18017e-05	3.59925e-06	TRUE	UP
TC1400002454.mm.2	Lacc1	1.17388	4.21137e-05	3.6318e-06	TRUE	UP
TC0500002700.mm.2	Sult1e1	2.08118	4.25583e-05	3.67398e-06	TRUE	UP
TC0900002514.mm.2	Plekho2	0.769221	4.28154e-05	3.6981e-06	TRUE	UP
TC0600000564.mm.2	Gimap8	0.689511	4.2844e-05	3.70249e-06	TRUE	UP
TC1600001824.mm.2	Nsun3	0.728279	4.2948e-05	3.71535e-06	TRUE	UP
TC1600001605.mm.2	Adprh	0.636268	4.32257e-05	3.74327e-06	TRUE	UP
TC1600000553.mm.2	Cd80	0.950362	4.51294e-05	3.92032e-06	TRUE	UP
TC1300002468.mm.2	Sv2c	0.752717	4.51781e-05	3.92751e-06	TRUE	UP
TC0500003632.mm.2	Slc46a3	0.960272	4.5734e-05	3.98314e-06	TRUE	UP
TC0700000424.mm.2	Tgfb1	0.750453	4.62526e-05	4.03247e-06	TRUE	UP
TC0100000490.mm.2	Icos	0.797482	4.759e-05	4.15978e-06	TRUE	UP
TC0500001349.mm.2	Oas1b	0.704293	4.82344e-05	4.2248e-06	TRUE	UP
TC0X00001859.mm.2	Med14	0.626975	4.87132e-05	4.2799e-06	TRUE	UP
TC0200003215.mm.2	Vav2	0.625888	5.1018e-05	4.50322e-06	TRUE	UP
TC1600001944.mm.2	D16Ertd472e	0.691558	5.1018e-05	4.50537e-06	TRUE	UP
TC1400001070.mm.2	Tsc22d1	1.62489	5.33924e-05	4.72467e-06	TRUE	UP
TC0300002500.mm.2	Hist2h3c2	0.957409	5.39054e-05	4.78221e-06	TRUE	UP
TC0300003216.mm.2	Hist2h3c1	0.957409	5.39054e-05	4.78221e-06	TRUE	UP
TC0500002325.mm.2	Tapt1	0.737772	5.40738e-05	4.79958e-06	TRUE	UP
TC1000002510.mm.2	Mob3a	0.744746	5.40819e-05	4.80273e-06	TRUE	UP
TC1200001282.mm.2	Crip1	0.665072	5.43874e-05	4.83231e-06	TRUE	UP
TC0900000100.mm.2	Sesn3	0.58058	5.47166e-05	4.86402e-06	TRUE	UP
TC0X00002994.mm.2	Btk	0.801721	5.6051e-05	4.99277e-06	TRUE	UP
TC1500000555.mm.2	Ly6f	0.645652	5.8398e-05	5.21758e-06	TRUE	UP
TC0100003627.mm.2	Akt3	0.691214	5.86203e-05	5.24008e-06	TRUE	UP
TC1300000514.mm.2	Jarid2	0.818261	5.86757e-05	5.24768e-06	TRUE	UP
TC1100000638.mm.2	Gpx3	1.05228	6.07699e-05	5.44592e-06	TRUE	UP
TC0800001118.mm.2	Ccl22	0.626721	6.17168e-05	5.53633e-06	TRUE	UP
TC0700002789.mm.2	Fxyd3	1.12139	6.34089e-05	5.71097e-06	TRUE	UP
TC0200000417.mm.2	Abca2	0.712065	6.41388e-05	5.78826e-06	TRUE	UP
TC1500001809.mm.2	Apol9a	0.984022	6.43519e-05	5.8104e-06	TRUE	UP
TC0300000210.mm.2	Skil	0.73087	6.4898e-05	5.86539e-06	TRUE	UP
TC0500002893.mm.2	Abcg3	0.78212	6.9668e-05	6.30921e-06	TRUE	UP
TC0700002779.mm.2	Cd22	0.908514	7.16293e-05	6.49974e-06	TRUE	UP
TC1700002346.mm.2	Slc25a23	0.757355	7.43004e-05	6.75549e-06	TRUE	UP
TC0900001115.mm.2	Rwdd2a	1.04158	7.45463e-05	6.78121e-06	TRUE	UP
TC1100003640.mm.2	Kpnb1	0.611232	7.5265e-05	6.84997e-06	TRUE	UP
TC0700004516.mm.2	Ifitm6	0.744293	7.85072e-05	7.1698e-06	TRUE	UP
TC1600000500.mm.2	Parp9	0.666522	7.85952e-05	7.18137e-06	TRUE	UP
TC1300001558.mm.2	Hist1h2ak	1.12056	7.95538e-05	7.27971e-06	TRUE	UP
TC1400002059.mm.2	Ajuba	0.880344	8.00165e-05	7.32566e-06	TRUE	UP
TC0300002802.mm.2	Vcam1	1.20178	8.00748e-05	7.3346e-06	TRUE	UP
TC0200003473.mm.2	Zeb2; Mir5129	0.744149	8.01088e-05	7.34132e-06	TRUE	UP
TC1500000649.mm.2	Cyth4	0.805326	8.25023e-05	7.56809e-06	TRUE	UP
TC0X00001955.mm.2	Klhl13	0.603098	8.51463e-05	7.82597e-06	TRUE	UP
TC0100003506.mm.2	Ddr2	0.701322	8.54293e-05	7.85584e-06	TRUE	UP
TC0200002301.mm.2	Tpx2	0.920851	8.73403e-05	8.05909e-06	TRUE	UP
TC0400001039.mm.2	Lepr	0.894855	8.74545e-05	8.07357e-06	TRUE	UP
TC0400003000.mm.2	Hacd4	0.845127	8.76342e-05	8.09805e-06	TRUE	UP
TC1700000474.mm.2	Ppard; 1810013A23Rik	0.98029	8.97034e-05	8.3135e-06	TRUE	UP
TC0900001675.mm.2	Ccr5	0.882029	9.44551e-05	8.7794e-06	TRUE	UP
TC1300000148.mm.2	Elmo1	0.784692	9.519e-05	8.85628e-06	TRUE	UP
TC0X00003236.mm.2	Sat1	0.838062	9.5668e-05	8.91368e-06	TRUE	UP
TC1200001110.mm.2	Evl	0.650145	9.5673e-05	8.91845e-06	TRUE	UP
TC1300001634.mm.2	Hist1h2ae	0.871812	9.60748e-05	8.96023e-06	TRUE	UP
TC1700002224.mm.2	A530064D06Rik	0.653623	9.64078e-05	8.99997e-06	TRUE	UP
TC0700004277.mm.2	Cd19	0.823134	9.66546e-05	9.02737e-06	TRUE	UP
TC0200002228.mm.2	Pygb	0.825036	9.71225e-05	9.07981e-06	TRUE	UP
TC0500002266.mm.2	Man2b2	0.686793	9.84115e-05	9.22248e-06	TRUE	UP
TC1600001337.mm.2	Klhl6	0.646576	9.88551e-05	9.27295e-06	TRUE	UP
TC1300002717.mm.2	Itga1; Pelo	0.665797	9.90077e-05	9.29347e-06	TRUE	UP
TC1100002754.mm.2	Slc22a4	0.583514	9.90077e-05	9.29618e-06	TRUE	UP
TC0100001175.mm.2	Pm20d1	0.998225	9.90295e-05	9.30269e-06	TRUE	UP
TC0400002392.mm.2	Zfp292	0.873406	9.98295e-05	9.38683e-06	TRUE	UP
TC1000000847.mm.2	Ndufs7	0.627917	0.000100796	9.49134e-06	TRUE	UP
TC0700000399.mm.2	Gm9844	0.932862	0.000103897	9.80205e-06	TRUE	UP
TC0500003178.mm.2	Oas1c	0.685181	0.00010617	1.00451e-05	TRUE	UP
TC1100003285.mm.2	Traf4	0.734801	0.000106585	1.00941e-05	TRUE	UP
TC1900001762.mm.2	Csf2ra	0.778804	0.000108093	1.02418e-05	TRUE	UP
TC0700003909.mm.2	Hbb-bs; Hbb-b1	1.49018	0.000112747	1.07233e-05	TRUE	UP
TC0700003764.mm.2	Thrsp	2.13178	0.000114923	1.09458e-05	TRUE	UP
TC1500000662.mm.2	H1f0	0.595797	0.000115662	1.10266e-05	TRUE	UP
TC0500002528.mm.2	Atp8a1	0.670688	0.000115663	1.10371e-05	TRUE	UP
TC0600001709.mm.2	Lrmp	0.618714	0.000116494	1.11216e-05	TRUE	UP
TC0400002251.mm.2	Ripk2	0.926051	0.000116735	1.11604e-05	TRUE	UP
TC1300001576.mm.2	Hist1h2ag	0.795272	0.000116954	1.11919e-05	TRUE	UP
TC0300000732.mm.2	Arhgef2	0.814257	0.000116998	1.12014e-05	TRUE	UP
TC0700000028.mm.2	Lilra5	0.759004	0.000117431	1.12481e-05	TRUE	UP
TC0100001604.mm.2	Slamf6	0.92712	0.000119073	1.14429e-05	TRUE	UP
TC0900000193.mm.2	Slc44a2	0.759402	0.000120575	1.16362e-05	TRUE	UP
TC1000001995.mm.2	Dse	0.610761	0.000121043	1.16922e-05	TRUE	UP
TC1100001848.mm.2	Kcnj16	0.852428	0.000122192	1.18142e-05	TRUE	UP
TC1300000245.mm.2	Hist1h2af	0.859855	0.000124415	1.20516e-05	TRUE	UP
TC1200000647.mm.2	Prkch	0.638623	0.00012453	1.20683e-05	TRUE	UP
TC1100003146.mm.2	Spns2	1.1929	0.000129168	1.25527e-05	TRUE	UP
TC0600002504.mm.2	Tmsb10	0.967591	0.000129216	1.25632e-05	TRUE	UP
TC0100003877.mm.2	Kdelc1	0.864076	0.000129665	1.26185e-05	TRUE	UP
TC0X00000801.mm.2	Tmem47	0.836322	0.000132854	1.29528e-05	TRUE	UP
TC0X00000213.mm.2	Cdk16	0.603007	0.000133703	1.30416e-05	TRUE	UP
TC0300000934.mm.2	Hist2h3b	0.872264	0.000134391	1.31147e-05	TRUE	UP
TC0500003090.mm.2	Mlec	0.763732	0.000138986	1.36132e-05	TRUE	UP
TC1600001089.mm.2	Bace2	0.71221	0.000142886	1.40145e-05	TRUE	UP
TC0200002018.mm.2	Smox	0.700761	0.00014456	1.42177e-05	TRUE	UP
TC1000003019.mm.2	Irak3	1.66717	0.000144592	1.42284e-05	TRUE	UP
TC1000001704.mm.2	Tab2	0.698551	0.000144592	1.42339e-05	TRUE	UP
TC0800002617.mm.2	Dnaja2	0.715127	0.000147392	1.45228e-05	TRUE	UP
TC0X00001084.mm.2	A630033H20Rik	0.91779	0.000148731	1.46682e-05	TRUE	UP
TC0300001081.mm.2	Rhoc	0.777228	0.000152618	1.50859e-05	TRUE	UP
TC0900000008.mm.2	Gm10715	1.71409	0.000152896	1.51203e-05	TRUE	UP
TC0500000054.mm.2	Abcb4	0.623696	0.000153369	1.51808e-05	TRUE	UP
TC1100003110.mm.2	Camta2	0.70962	0.000154183	1.52683e-05	TRUE	UP
TC0700003778.mm.2	Tsku	2.43966	0.000159618	1.58641e-05	TRUE	UP
TC0100003549.mm.2	Ly9	0.591612	0.000161605	1.60906e-05	TRUE	UP
TC1700002179.mm.2	Srf	0.645054	0.000163188	1.6285e-05	TRUE	UP
TC0800003068.mm.2	Cyba	0.852482	0.000166615	1.66495e-05	TRUE	UP
TC0500003169.mm.2	Tpcn1	0.654076	0.000167151	1.67106e-05	TRUE	UP
TC1300002119.mm.2	Golm1	0.768605	0.00016972	1.69951e-05	TRUE	UP
TC1600000674.mm.2	Btla	1.01025	0.000170018	1.70355e-05	TRUE	UP
TC0400003888.mm.2	Plekhm2	0.692844	0.000171699	1.72349e-05	TRUE	UP
TC0600001508.mm.2	Foxm1; 4933413G19Rik	0.865	0.000172151	1.7288e-05	TRUE	UP
TC1500002032.mm.2	Ttll8	0.834185	0.000172614	1.735e-05	TRUE	UP
TC0700004624.mm.2	Plk1	1.23821	0.000177111	1.78339e-05	TRUE	UP
TC1000001596.mm.2	Stat2	0.771739	0.000178544	1.80095e-05	TRUE	UP
TC1100000822.mm.2	Pmp22	0.750344	0.000181841	1.84003e-05	TRUE	UP
TC1000002211.mm.2	Oit3	0.665634	0.000184134	1.8682e-05	TRUE	UP
TC1500000647.mm.2	Kctd17	0.643913	0.000187158	1.90141e-05	TRUE	UP
TC1400000513.mm.2	Lgals3	0.831703	0.000190155	1.93443e-05	TRUE	UP
TC1700000036.mm.2	Zdhhc14	0.61817	0.000191111	1.94501e-05	TRUE	UP
TC0700003548.mm.2	Det1	0.661612	0.000191192	1.9467e-05	TRUE	UP
TC1600001373.mm.2	Tmem41a	0.791196	0.000191397	1.94965e-05	TRUE	UP
TC0100001382.mm.2	Rnasel	0.611359	0.00019235	1.96196e-05	TRUE	UP
TC1900000990.mm.2	Dpf2	0.595815	0.0001931	1.97048e-05	TRUE	UP
TC0600002323.mm.2	Nod1	0.64846	0.000195547	2.00073e-05	TRUE	UP
TC1600001827.mm.2	Epha3	0.607971	0.000196412	2.01135e-05	TRUE	UP
TC0300000753.mm.2	Muc1	0.814239	0.000197019	2.01934e-05	TRUE	UP
TC1000001549.mm.2	Agap2	0.675906	0.000199219	2.04548e-05	TRUE	UP
TC0100002461.mm.2	Klf7	0.585308	0.000204366	2.102e-05	TRUE	UP
TC0600001368.mm.2	Tuba8	0.942319	0.000204798	2.10738e-05	TRUE	UP
TC1100000887.mm.2	Slc25a35	0.601286	0.000205685	2.11835e-05	TRUE	UP
TC1500001730.mm.2	Ly6c2	1.49643	0.000206032	2.12285e-05	TRUE	UP
TC0700004451.mm.2	Mki67	1.15391	0.000207488	2.14128e-05	TRUE	UP
TC1900000508.mm.2	Kif20b	0.93904	0.000207488	2.1416e-05	TRUE	UP
TC0300002229.mm.2	Lrat	0.681993	0.000209272	2.16284e-05	TRUE	UP
TC0300002467.mm.2	Tnfaip8l2	0.605344	0.000211032	2.18387e-05	TRUE	UP
TC0100003797.mm.2	Mfsd7b	0.649366	0.000212603	2.20109e-05	TRUE	UP
TC0300000935.mm.2	Hist2h2bb	0.745924	0.000217191	2.25544e-05	TRUE	UP
TC0700004002.mm.2	Gvin1	1.15384	0.000218671	2.27474e-05	TRUE	UP
TC0300000172.mm.2	Tnik	0.581703	0.000220946	2.29941e-05	TRUE	UP
TC0900000006.mm.2	Gm10717	1.37076	0.000223605	2.3311e-05	TRUE	UP
TC0400004047.mm.2	Pik3cd	0.75221	0.000227108	2.37172e-05	TRUE	UP
TC1400000575.mm.2	Pnp2	0.723569	0.00022971	2.40303e-05	TRUE	UP
TC1100000336.mm.2	Hba-a2; Hba-a1	1.24149	0.000240044	2.52087e-05	TRUE	UP
TC0900001905.mm.2	Zfp810	0.663134	0.000245671	2.58438e-05	TRUE	UP
TC0600002056.mm.2	Wdr91	0.889058	0.000246543	2.59467e-05	TRUE	UP
TC0200005438.mm.2	Helz2	0.687446	0.000246785	2.59943e-05	TRUE	UP
TC0200000240.mm.2	Vim	0.962899	0.000247134	2.60422e-05	TRUE	UP
TC1200001625.mm.2	Hdac9	0.592591	0.000249663	2.632e-05	TRUE	UP
TC1400000976.mm.2	Loxl2; Mir6950	0.642572	0.000253293	2.6714e-05	TRUE	UP
TC1100003990.mm.2	Slc16a6	0.985598	0.000253969	2.68083e-05	TRUE	UP
TC1100002176.mm.2	Myo1g	0.750308	0.000255794	2.7047e-05	TRUE	UP
TC0400004034.mm.2	Pgd	0.837228	0.000256209	2.71023e-05	TRUE	UP
TC1700001969.mm.2	Tcf19	0.832935	0.000256249	2.71181e-05	TRUE	UP
TC1100000339.mm.2	Hba-a1; Hba-a2	1.18826	0.000256643	2.71829e-05	TRUE	UP
TC1500001167.mm.2	Osmr	0.59221	0.000259315	2.7501e-05	TRUE	UP
TC1700002558.mm.2	Eif2ak2	0.707953	0.000263558	2.80103e-05	TRUE	UP
TC1100000802.mm.2	Trpv2	0.635471	0.000269735	2.8764e-05	TRUE	UP
TC0300000852.mm.2	S100a11	1.00643	0.000270252	2.88312e-05	TRUE	UP
TC0500001573.mm.2	Stx1a	0.665018	0.000272025	2.90412e-05	TRUE	UP
TC1000000730.mm.2	Vpreb3	0.667935	0.000272644	2.91233e-05	TRUE	UP
TC0700003908.mm.2	Hbb-bt; Hbb-b2	1.35966	0.000275011	2.93885e-05	TRUE	UP
TC0100003301.mm.2	Mr1	0.748841	0.000278144	2.97734e-05	TRUE	UP
TC1300001649.mm.2	Slc17a4	0.949801	0.000285905	3.06942e-05	TRUE	UP
TC0700001800.mm.2	Sbk1	0.626413	0.000286707	3.08062e-05	TRUE	UP
TC0800001204.mm.2	Cbfb	0.593225	0.000290112	3.12113e-05	TRUE	UP
TC0500000580.mm.2	G6pd2	0.859783	0.00029353	3.16186e-05	TRUE	UP
TC0600003364.mm.2	Slco1a4	1.26366	0.000295311	3.18504e-05	TRUE	UP
TC1100001708.mm.2	Fmnl1	0.701449	0.000296011	3.19525e-05	TRUE	UP
TC0800002542.mm.2	Il15	0.972174	0.000297195	3.20937e-05	TRUE	UP
TC0X00001653.mm.2	Ctps2	0.685	0.000298986	3.23141e-05	TRUE	UP
TC0300000500.mm.2	Mme	0.947591	0.000300876	3.25454e-05	TRUE	UP
TC0300001444.mm.2	Gbp2b; Gbp5	0.670417	0.000304573	3.29865e-05	TRUE	UP
TC0900000002.mm.2	Gm11168	1.26609	0.000307882	3.34419e-05	TRUE	UP
TC1700002287.mm.2	Sult1c2	0.989692	0.000310076	3.36942e-05	TRUE	UP
TC0700000239.mm.2	Prkd2	0.695942	0.000313352	3.40925e-05	TRUE	UP
TC0900002149.mm.2	Cbl	0.582011	0.000319247	3.48345e-05	TRUE	UP
TC1300002534.mm.2	Naip1	0.590797	0.000319685	3.48967e-05	TRUE	UP
TC0900000007.mm.2	Gm17535	1.43957	0.000325556	3.55816e-05	TRUE	UP
TC1100003966.mm.2	Prkca	0.719384	0.000331781	3.64114e-05	TRUE	UP
TC0800001078.mm.2	Lpcat2	0.862409	0.000336287	3.69403e-05	TRUE	UP
TC1300001574.mm.2	Hist1h2ah	0.760163	0.000336287	3.69513e-05	TRUE	UP
TC1700001105.mm.2	Epb41l3	0.746051	0.000338554	3.72461e-05	TRUE	UP
TC0400001325.mm.2	Slc2a1	0.611576	0.000345122	3.80309e-05	TRUE	UP
TC1100002096.mm.2	Tug1	0.590254	0.000353347	3.90008e-05	TRUE	UP
TC0200005429.mm.2	Chrna4	2.30656	0.000354912	3.91896e-05	TRUE	UP
TC0100001173.mm.2	Rab7b	0.761649	0.000357915	3.95936e-05	TRUE	UP
TC0600002044.mm.2	Slc35b4	0.626721	0.000360554	3.99263e-05	TRUE	UP
TC0600002802.mm.2	Frmd4b	0.901884	0.000363947	4.03675e-05	TRUE	UP
TC0400002578.mm.2	Slc25a51	0.831685	0.000369652	4.10503e-05	TRUE	UP
TC1700000600.mm.2	Daxx	0.597899	0.000375232	4.17206e-05	TRUE	UP
TC0100000765.mm.2	Sp140	0.674185	0.000376061	4.18297e-05	TRUE	UP
TC0X00003400.mm.2	Gm6377	0.808696	0.000390286	4.35878e-05	TRUE	UP
TC0100001631.mm.2	Aim2	0.684656	0.000395326	4.41862e-05	TRUE	UP
TC1100000494.mm.2	Trim7	0.645652	0.000398131	4.45893e-05	TRUE	UP
TC0200005281.mm.2	Bmp7	0.727319	0.000401584	4.50072e-05	TRUE	UP
TC1400000940.mm.2	Pbk	0.791467	0.000401584	4.50123e-05	TRUE	UP
TC1000002256.mm.2	Hk1	0.644275	0.000403571	4.52714e-05	TRUE	UP
TC1100003781.mm.2	Rab5c	0.623786	0.000410318	4.61206e-05	TRUE	UP
TC1300002532.mm.2	Naip6; Naip7	0.646341	0.000411024	4.6237e-05	TRUE	UP
TC0100002690.mm.2	Pid1	0.676486	0.00041313	4.65111e-05	TRUE	UP
TC0700004201.mm.2	Cdr2	0.592192	0.000413503	4.65717e-05	TRUE	UP
TC1600000988.mm.2	Mrap	0.92404	0.000414056	4.66526e-05	TRUE	UP
TC1100004127.mm.2	Jmjd6	0.66913	0.000424576	4.80098e-05	TRUE	UP
TC1000001518.mm.2	Fam19a2	0.738062	0.000435986	4.94376e-05	TRUE	UP
TC1500002246.mm.2	Smagp	1.08025	0.000463875	5.29343e-05	TRUE	UP
TC0800001410.mm.2	Hsd17b2	0.616938	0.000483155	5.54608e-05	TRUE	UP
TC1100001242.mm.2	Slfn3	0.717754	0.000494354	5.68798e-05	TRUE	UP
TC0800001182.mm.2	Cmtm3	0.66038	0.00049477	5.695e-05	TRUE	UP
TC0500002843.mm.2	Hpse	0.603062	0.000495611	5.70691e-05	TRUE	UP
TC1300000281.mm.2	D130043K22Rik	0.779257	0.000499714	5.75866e-05	TRUE	UP
TC1900001415.mm.2	Acta2	1.2504	0.000504	5.8194e-05	TRUE	UP
TC0600002579.mm.2	Cd207	0.658931	0.000504125	5.82312e-05	TRUE	UP
TC0200001757.mm.2	Casc5	0.759312	0.000504518	5.82992e-05	TRUE	UP
TC0700003862.mm.2	Trim21	0.586178	0.000505783	5.84682e-05	TRUE	UP
TC1400001524.mm.2	Gng2	0.724366	0.000517303	5.9966e-05	TRUE	UP
TC0600001890.mm.2	Tfec	0.584511	0.000529955	6.17875e-05	TRUE	UP
TC0700003942.mm.2	Trim30c	0.813623	0.00053251	6.21705e-05	TRUE	UP
TC1700002120.mm.2	Cd2ap	0.625616	0.000532925	6.22615e-05	TRUE	UP
TC1000001696.mm.2	Ulbp1	0.685797	0.000536394	6.2804e-05	TRUE	UP
TC1100003787.mm.2	Stat5b	0.610888	0.000549927	6.45866e-05	TRUE	UP
TC1500001833.mm.2	Il2rb	0.713587	0.000553593	6.51353e-05	TRUE	UP
TC1300001285.mm.2	Esm1	0.988442	0.000553593	6.51418e-05	TRUE	UP
TC0600000772.mm.2	Mad2l1	0.787681	0.000562444	6.62846e-05	TRUE	UP
TC0700003998.mm.2	Gm8979; Gm8989	0.661612	0.000576057	6.80186e-05	TRUE	UP
TC0700004007.mm.2	Gm8989	0.661612	0.000576057	6.80186e-05	TRUE	UP
TC1900001622.mm.2	Calhm2	0.605489	0.000597013	7.07619e-05	TRUE	UP
TC0700002053.mm.2	Pnpla2	0.92067	0.000599508	7.10846e-05	TRUE	UP
TC1500001623.mm.2	Fam49b	0.689728	0.000602612	7.14798e-05	TRUE	UP
TC1500000235.mm.2	Laptm4b	0.660562	0.000610964	7.25806e-05	TRUE	UP
TC0600002089.mm.2	Creb3l2	0.866105	0.000611982	7.27291e-05	TRUE	UP
TC1700002152.mm.2	Slc29a1	0.627572	0.000623772	7.42425e-05	TRUE	UP
TC1600002080.mm.2	Tmem50b	0.62712	0.000626721	7.46678e-05	TRUE	UP
TC1200001834.mm.2	Mis18bp1	0.871504	0.000627844	7.48402e-05	TRUE	UP
TC1300000087.mm.2	Nid1	0.66846	0.000634789	7.58397e-05	TRUE	UP
TC0800001903.mm.2	Plekha2	0.627446	0.000671234	8.05566e-05	TRUE	UP
TC0200003303.mm.2	Lcn2	3.85395	0.000698223	8.411e-05	TRUE	UP
TC1300000173.mm.2	Hist1h2ai	0.640145	0.000712382	8.60081e-05	TRUE	UP
TC1200002288.mm.2	Serpina12	0.802482	0.000716525	8.66374e-05	TRUE	UP
TC1300001633.mm.2	Hist1h3e	0.857174	0.000724896	8.76822e-05	TRUE	UP
TC0700004086.mm.2	Tmem41b	0.586576	0.000728148	8.81411e-05	TRUE	UP
TC1400001182.mm.2	Irg1	0.763351	0.000741249	8.98939e-05	TRUE	UP
TC0100002894.mm.2	Bcl2	0.661576	0.000766627	9.35239e-05	TRUE	UP
TC1300000522.mm.2	Mylip	0.631033	0.000771551	9.42289e-05	TRUE	UP
TC1200001686.mm.2	Stxbp6	0.588696	0.000776108	9.49601e-05	TRUE	UP
TC0900002779.mm.2	Pgm3	1.30051	0.000782683	9.58351e-05	TRUE	UP
TC1300000260.mm.2	Hist1h2ab	0.673225	0.000802494	9.85499e-05	TRUE	UP
TC0800000991.mm.2	Gpt2	0.619239	0.000818733	0.000100876	TRUE	UP
TC1800000677.mm.2	Zfp532	0.635145	0.000871626	0.000107864	TRUE	UP
TC0100001602.mm.2	Cd84	0.687627	0.000894496	0.000111094	TRUE	UP
TC1300001561.mm.2	Hist1h3i	0.765199	0.000922301	0.000114966	TRUE	UP
TC0400004199.mm.2	Gm13212	0.802446	0.00094515	0.000117942	TRUE	UP
TC0500000096.mm.2	Pclo	0.624819	0.000946487	0.000118206	TRUE	UP
TC0500003625.mm.2	Urad	0.590888	0.000955967	0.000119507	TRUE	UP
TC0200005475.mm.2	Dusp19	0.637446	0.000960035	0.000120058	TRUE	UP
TC0100000021.mm.2	Rb1cc1	0.585272	0.000968361	0.000121231	TRUE	UP
TC1300001270.mm.2	Plpp1	0.695145	0.000978046	0.000122619	TRUE	UP
TC0900002396.mm.2	Cd276	0.58596	0.000982904	0.000123272	TRUE	UP
TC1300001461.mm.2	Gpr137b	0.597554	0.000989017	0.000124173	TRUE	UP
TC0700004633.mm.2	Gm15448	0.593641	0.00102357	0.000128851	TRUE	UP
TC0300002139.mm.2	B3galnt1	0.652101	0.00102357	0.00012888	TRUE	UP
TC1300000076.mm.2	Gm2399	0.704964	0.00103566	0.000130589	TRUE	UP
TC0900000854.mm.2	2810417H13Rik	0.69375	0.00103678	0.000130776	TRUE	UP
TC1600000264.mm.2	B3gnt5	0.684565	0.00105367	0.000133096	TRUE	UP
TC1400001514.mm.2	Gm21738	1.2435	0.00106108	0.000134176	TRUE	UP
TC0200001741.mm.2	Bub1b	0.913605	0.00109185	0.00013864	TRUE	UP
TC1700000618.mm.2	H2-DMa	0.680507	0.00115318	0.000147173	TRUE	UP
TC1400001724.mm.2	Fam25c	0.724783	0.00115583	0.000147562	TRUE	UP
TC0300002311.mm.2	Slc25a44	0.743659	0.00117848	0.000150773	TRUE	UP
TC0200001502.mm.2	Gm10801	1.26074	0.00119175	0.000152578	TRUE	UP
TC0800000756.mm.2	Isyna1	0.815525	0.00120999	0.00015524	TRUE	UP
TC0700001399.mm.2	Chrdl2	0.63029	0.00123316	0.000158713	TRUE	UP
TC1700001620.mm.2	Tbc1d24; Ntn3	0.664764	0.00123668	0.000159222	TRUE	UP
TC0300000948.mm.2	Hfe2	0.63933	0.00124214	0.00015998	TRUE	UP
TC0200001951.mm.2	Slc20a1	0.960344	0.00124984	0.000161085	TRUE	UP
TC0900001612.mm.2	Ctnnb1; Mir7090	0.606685	0.00125623	0.000162191	TRUE	UP
TC1200001810.mm.2	Clec14a	0.622917	0.00127465	0.000165086	TRUE	UP
TC0300002051.mm.2	P2ry14; F630111L10Rik	0.592101	0.00128802	0.000166933	TRUE	UP
TC0900000004.mm.2	Gm10720	1.17071	0.00128951	0.000167185	TRUE	UP
TC0100003399.mm.2	Fmo4	0.715688	0.00131605	0.000171112	TRUE	UP
TC0700003940.mm.2	Trim12c	0.784076	0.00131605	0.000171171	TRUE	UP
TC0200000603.mm.2	Angptl2	0.590127	0.00133559	0.000174249	TRUE	UP
TC0100003099.mm.2	Prelp	0.587156	0.00134134	0.000175144	TRUE	UP
TC1600001208.mm.2	Txndc11	0.594783	0.00137923	0.000180494	TRUE	UP
TC0600000948.mm.2	Dysf	0.593678	0.00138619	0.00018153	TRUE	UP
TC0700004553.mm.2	Dusp8	0.823551	0.00138667	0.000181654	TRUE	UP
TC0800000707.mm.2	Lpl	0.583297	0.00138944	0.000182143	TRUE	UP
TC1900000529.mm.2	Kif11	0.7225	0.00142216	0.00018688	TRUE	UP
TC1900001493.mm.2	Tctn3	0.695199	0.00143776	0.000189253	TRUE	UP
TC0300000307.mm.2	Hspa4l	1.09437	0.00149337	0.000197516	TRUE	UP
TC0600001203.mm.2	Bhlhe40	1.05911	0.00151649	0.000200915	TRUE	UP
TC1100004242.mm.2	Sectm1a	0.593822	0.00154739	0.000205301	TRUE	UP
TC0200003365.mm.2	Ggta1	0.630217	0.00154739	0.000205357	TRUE	UP
TC0600003370.mm.2	Slco1a5	0.68529	0.00157858	0.000209994	TRUE	UP
TC0X00001276.mm.2	Cenpi	0.672446	0.00157931	0.000210163	TRUE	UP
TC1700000564.mm.2	Cyp4f16	0.743152	0.00158442	0.000210913	TRUE	UP
TC0100000343.mm.2	Col3a1	0.97663	0.00161736	0.000215905	TRUE	UP
TC1900000186.mm.2	Fads3	0.582464	0.0016311	0.000218068	TRUE	UP
TC0200005015.mm.2	Rbl1	0.789203	0.00167083	0.000224297	TRUE	UP
TC0500001773.mm.2	Cyp3a57	0.756322	0.00173511	0.00023449	TRUE	UP
TC1700002434.mm.2	Rab12	0.639601	0.00175807	0.000238146	TRUE	UP
TC0100002503.mm.2	Erbb4	0.932301	0.00176326	0.000238928	TRUE	UP
TC1000001551.mm.2	B4galnt1	0.694529	0.00178042	0.000241495	TRUE	UP
TC0500000050.mm.2	Abcb1a	0.999022	0.00183273	0.000249249	TRUE	UP
TC0700003996.mm.2	Gm4070; Gvin1; Gm17757; Gm18853	0.79337	0.00183639	0.000249875	TRUE	UP
TC0800000368.mm.2	Rnf122	0.696105	0.00188081	0.000256731	TRUE	UP
TC0200003672.mm.2	Ttc21b	0.68587	0.00189288	0.000258795	TRUE	UP
TC1700001033.mm.2	Vav1	0.690725	0.00192168	0.000263425	TRUE	UP
TC0600003114.mm.2	Ptpn6	0.586377	0.0019979	0.000275492	TRUE	UP
TC1200001861.mm.2	Pole2	0.684783	0.00201604	0.000278538	TRUE	UP
TC1600001919.mm.2	Samsn1	0.759583	0.00206028	0.0002853	TRUE	UP
TC0200004599.mm.2	Il1a	0.611848	0.00207652	0.000288257	TRUE	UP
TC0900000189.mm.2	Pde4a	0.659293	0.0020826	0.000289329	TRUE	UP
TC0400003379.mm.2	Atp6v0b	0.660181	0.00209479	0.000291773	TRUE	UP
TC0900002593.mm.2	Ccnb2	0.9325	0.00209755	0.00029235	TRUE	UP
TC0100003795.mm.2	Rps6kc1	0.66058	0.00211952	0.000295603	TRUE	UP
TC1500001940.mm.2	Cenpm	0.697681	0.00212081	0.000295879	TRUE	UP
TC0X00002834.mm.2	Cysltr1	0.688188	0.00212721	0.000297315	TRUE	UP
TC1200001031.mm.2	Ppp4r4	0.674746	0.00212721	0.000297346	TRUE	UP
TC0200000383.mm.2	Psd4	0.620181	0.00220141	0.000309403	TRUE	UP
TC0700004638.mm.2	Rab4b; Mir3101	0.731232	0.00227083	0.00032008	TRUE	UP
TC1900001461.mm.2	Myof	0.582355	0.00232114	0.000328634	TRUE	UP
TC0600003537.mm.2	Clec9a	0.778297	0.00233957	0.000331349	TRUE	UP
TC1900000309.mm.2	Gna14	0.607772	0.00236442	0.00033504	TRUE	UP
TC0400000696.mm.2	Slc31a2	0.62279	0.00239804	0.000340386	TRUE	UP
TC1000001625.mm.2	Cd63	0.590163	0.00247552	0.000353391	TRUE	UP
TC0500002481.mm.2	Tlr6	0.667953	0.00251438	0.000360064	TRUE	UP
TC1200002242.mm.2	Fbln5	0.702355	0.00251806	0.000360824	TRUE	UP
TC0300001760.mm.2	Fndc3b	0.685507	0.00252487	0.000361914	TRUE	UP
TC1000001894.mm.2	Enpp1	0.584402	0.00256214	0.000367717	TRUE	UP
TC1400000072.mm.2	Abhd6	0.780362	0.00263111	0.000379393	TRUE	UP
TC0X00001658.mm.2	Ap1s2	0.580272	0.00266253	0.000384597	TRUE	UP
TC0100000524.mm.2	Adam23	0.6625	0.00268563	0.000388222	TRUE	UP
TC0800002431.mm.2	Bst2	0.988913	0.00277664	0.000403254	TRUE	UP
TC1000002008.mm.2	Marcks	0.601268	0.00279225	0.000405774	TRUE	UP
TC1600001304.mm.2	Prodh	0.764022	0.002912	0.000425535	TRUE	UP
TC0700000005.mm.2	Myadm	0.629873	0.00296655	0.000434709	TRUE	UP
TC0800001617.mm.2	Clec4g	0.605254	0.00303521	0.000446684	TRUE	UP
TC0600003605.mm.2	Klrb1c	0.596214	0.00317368	0.000471493	TRUE	UP
TC1600001553.mm.2	Dirc2	0.618605	0.00317525	0.000472012	TRUE	UP
TC0600002067.mm.2	Fam180a	0.757391	0.00328583	0.00048993	TRUE	UP
TC0300001856.mm.2	Ccna2	0.672138	0.00328877	0.000490516	TRUE	UP
TC1300000028.mm.2	Klf6	0.779837	0.00335006	0.000500606	TRUE	UP
TC1300000181.mm.2	Hist1h2ao; Hist1h2ap; Hist1h2ai; Hist1h2ah	0.63404	0.00335006	0.000500714	TRUE	UP
TC1300001565.mm.2	Hist1h2ap	0.63404	0.00335006	0.000500714	TRUE	UP
TC1200001938.mm.2	Wdr89; Rplp2-ps1	0.615525	0.00347356	0.000520894	TRUE	UP
TC0800000846.mm.2	Mcm5	0.672572	0.00360735	0.00054323	TRUE	UP
TC0700001151.mm.2	Prc1	0.682373	0.00363834	0.000548617	TRUE	UP
TC1200001028.mm.2	Otub2	0.651866	0.00367583	0.000555529	TRUE	UP
TC1200000279.mm.2	Nampt	0.953496	0.00369354	0.000558872	TRUE	UP
TC1100002301.mm.2	Slc1a4	0.70067	0.0037302	0.000565931	TRUE	UP
TC1500001144.mm.2	Fbxo4	0.603152	0.00392748	0.00060152	TRUE	UP
TC0900003300.mm.2	Cdcp1	0.610217	0.00400647	0.000615603	TRUE	UP
TC0X00000313.mm.2	Dock11	0.714855	0.00402008	0.000618418	TRUE	UP
TC0700002372.mm.2	Sult2a1	0.583678	0.00412962	0.000637872	TRUE	UP
TC0500001399.mm.2	P2rx7	0.678714	0.0042988	0.000666908	TRUE	UP
TC0400000705.mm.2	Rgs3	0.71	0.00435728	0.000679316	TRUE	UP
TC0500002833.mm.2	Sec31a	0.592899	0.00436172	0.000680597	TRUE	UP
TC0200004537.mm.2	Atp8b4	0.603859	0.00438124	0.00068384	TRUE	UP
TC0900000001.mm.2	Gm10718; Gm10722	0.835924	0.00445281	0.000696616	TRUE	UP
TC1000001044.mm.2	Timp3	0.809946	0.004552	0.00071439	TRUE	UP
TC1100003771.mm.2	Nt5c3b	0.710652	0.00455881	0.000715868	TRUE	UP
TC0300001757.mm.2	Ect2	0.675435	0.00470717	0.000743828	TRUE	UP
TC1500002217.mm.2	Racgap1	0.665616	0.00496209	0.000790369	TRUE	UP
TC0100001597.mm.2	Cd48	0.587264	0.00502821	0.000801806	TRUE	UP
TC1400001039.mm.2	Gm21750	0.649964	0.005056	0.00080692	TRUE	UP
TC0800002115.mm.2	Fgl1	0.960634	0.00516293	0.000825846	TRUE	UP
TC0900000005.mm.2	Gm10719	0.968659	0.00519186	0.000831175	TRUE	UP
TC0500000052.mm.2	Abcb1b	0.613514	0.00522806	0.000838147	TRUE	UP
TC0600003334.mm.2	Art4	0.673696	0.00543685	0.000877005	TRUE	UP
TC0400002531.mm.2	Gba2	0.669529	0.00552639	0.000893191	TRUE	UP
TC1300000266.mm.2	Slc17a3	0.64625	0.00559521	0.00090759	TRUE	UP
TC1900001422.mm.2	Ifit1bl1	0.58913	0.00612009	0.00100403	TRUE	UP
TC1000003213.mm.2	Lilr4b	0.819982	0.00615956	0.00101134	TRUE	UP
TC0700003552.mm.2	Mfge8	0.64558	0.00620708	0.00102067	TRUE	UP
TC1300000246.mm.2	Hist1h3g	0.603496	0.00646502	0.00107052	TRUE	UP
TC1600000930.mm.2	Gm21833	0.6475	0.00646569	0.00107092	TRUE	UP
TC1300000174.mm.2	Hist1h3h	0.674257	0.00665973	0.00110636	TRUE	UP
TC1500002142.mm.2	Slc38a2	0.82692	0.00689029	0.00115024	TRUE	UP
TC0700000810.mm.2	Napsa	0.63846	0.00708049	0.00118486	TRUE	UP
TC1600001092.mm.2	Mx2	0.740815	0.00708251	0.00118602	TRUE	UP
TC0900001674.mm.2	Ccr2	0.803188	0.00717334	0.00120492	TRUE	UP
TC0X00002468.mm.2	Gm38425; Gab3	0.605127	0.00734801	0.0012389	TRUE	UP
TC1400000574.mm.2	Pnp	0.732174	0.00770352	0.00130751	TRUE	UP
TC0400002275.mm.2	Atp6v0d2	0.839475	0.00770886	0.00130934	TRUE	UP
TC0400000718.mm.2	Orm1	0.585598	0.00783201	0.00133531	TRUE	UP
TC1900001541.mm.2	Got1	0.71058	0.00791088	0.00134983	TRUE	UP
TC1100003401.mm.2	Ccl3	0.61779	0.00804109	0.00137386	TRUE	UP
TC0400003390.mm.2	Cdc20	0.774493	0.00809066	0.00138488	TRUE	UP
TC0200002894.mm.2	Celf2	0.704185	0.00825467	0.00141748	TRUE	UP
TC1700000496.mm.2	Cdkn1a	1.82317	0.00855534	0.00147675	TRUE	UP
TC0500001408.mm.2	Tmem120b	0.634801	0.00869674	0.00150507	TRUE	UP
TC0600003205.mm.2	Fkbp4	0.777319	0.00872698	0.00151266	TRUE	UP
TC0400002549.mm.2	Gne	0.590996	0.00875762	0.00151955	TRUE	UP
TC1200001605.mm.2	Pik3cg	0.596159	0.00918596	0.00160587	TRUE	UP
TC0700002124.mm.2	Nlrp12	0.763605	0.0101355	0.00180016	TRUE	UP
TC0100003449.mm.2	Mpzl1	0.706667	0.0103707	0.00184942	TRUE	UP
TC1900000127.mm.2	Ppp1r14b	0.621413	0.0115419	0.00209828	TRUE	UP
TC1100000547.mm.2	Adamts2	0.59942	0.0115606	0.00210221	TRUE	UP
TC0500002757.mm.2	Cxcl11	0.650996	0.0119288	0.00218153	TRUE	UP
TC0700001673.mm.2	Insc	0.760942	0.0120604	0.00221156	TRUE	UP
TC1900001131.mm.2	Ms4a7	0.836576	0.0121004	0.00221945	TRUE	UP
TC0500002896.mm.2	Gbp11	1.01772	0.0122019	0.00224025	TRUE	UP
TC1900000015.mm.2	1810055G02Rik	0.928116	0.0122325	0.00224833	TRUE	UP
TC0400001047.mm.2	Pde4b	0.654203	0.0125048	0.00230995	TRUE	UP
TC0400001147.mm.2	Zcchc11	0.583007	0.0126481	0.00233984	TRUE	UP
TC0200004676.mm.2	Gpcpd1	1.11408	0.0131019	0.00243677	TRUE	UP
TC0200004602.mm.2	Il1b	0.588388	0.0136898	0.00257508	TRUE	UP
TC0100001765.mm.2	Dusp10	0.618406	0.0137343	0.00258568	TRUE	UP
TC0900000003.mm.2	Gm10721	1.10288	0.014731	0.00281472	TRUE	UP
TC0400001785.mm.2	Epha2	0.668514	0.0149236	0.00285555	TRUE	UP
TC1700000644.mm.2	Tnxb	0.603569	0.0149841	0.00286983	TRUE	UP
TC1700001699.mm.2	Dusp1	0.99375	0.0150418	0.00288155	TRUE	UP
TC1300002543.mm.2	Ccnb1	0.586413	0.0156684	0.00302276	TRUE	UP
TC1200001464.mm.2	Pqlc3	0.690598	0.015676	0.00302494	TRUE	UP
TC0100003522.mm.2	Fcgr2b	0.597645	0.0166775	0.00325423	TRUE	UP
TC0400002095.mm.2	Mxra8	0.617917	0.0174662	0.00343016	TRUE	UP
TC1700001154.mm.2	Ehd3	0.625616	0.019252	0.00384742	TRUE	UP
TC1600001742.mm.2	Nfkbiz	0.666848	0.019535	0.00391563	TRUE	UP
TC0500001240.mm.2	Oasl1	0.721866	0.0204366	0.00413316	TRUE	UP
TC1500001568.mm.2	Atad2	0.596558	0.0230925	0.00477741	TRUE	UP
TC0300001364.mm.2	Cenpe	0.590634	0.0234698	0.0048692	TRUE	UP
TC1700000214.mm.2	Fpr2; Fpr3	0.580652	0.0248292	0.00520937	TRUE	UP
TC1700000047.mm.2	Synj2	0.710435	0.0260647	0.00552126	TRUE	UP
TC0600001433.mm.2	Cdca3	0.673533	0.0264384	0.00562224	TRUE	UP
TC0100001943.mm.2	Mybl1	0.715688	0.0274794	0.00588791	TRUE	UP
TC0500002895.mm.2	Gbp10; Gbp6	0.805272	0.0290968	0.00632094	TRUE	UP
TC1600002094.mm.2	Rcan1	0.928098	0.029436	0.00641453	TRUE	UP
TC0200001006.mm.2	Dhrs9	0.795236	0.0295187	0.00643785	TRUE	UP
TC0900000132.mm.2	Chordc1	0.74663	0.0295606	0.00644965	TRUE	UP
TC1100001895.mm.2	Slc16a5	0.970761	0.0296166	0.00646455	TRUE	UP
TC1100004202.mm.2	Actg1; Mir6935	0.795272	0.0322066	0.0071662	TRUE	UP
TC0400001449.mm.2	Csf3r	0.662482	0.0338879	0.00761477	TRUE	UP
TC0800001891.mm.2	1810011O10Rik	0.722482	0.0340225	0.00765299	TRUE	UP
TC1800000291.mm.2	Kif20a	0.62029	0.0346572	0.00782542	TRUE	UP
TC0500000260.mm.2	Insig1	0.679203	0.039479	0.00915772	TRUE	UP
TC1100003409.mm.2	Gm11437	0.771377	0.040752	0.00952091	TRUE	UP
TC0900002817.mm.2	Tmed3	0.582663	0.0469564	0.0113151	TRUE	UP
TC0700001875.mm.2	Itgam	0.709493	0.0518223	0.012721	TRUE	UP
TC0400000401.mm.2	Gm10600	0.625036	0.0542183	0.0134868	TRUE	UP
TC0700000896.mm.2	Nav2	0.592337	0.0545651	0.0135909	TRUE	UP
TC0500000922.mm.2	Cxcl13	0.633188	0.0591989	0.0150223	TRUE	UP
TC0400000386.mm.2	Gm3893; 4933409K07Rik	0.60096	0.0618866	0.0158777	TRUE	UP
TC0100000393.mm.2	Coq10b	0.701214	0.0688206	0.0180714	TRUE	UP
TC0200000879.mm.2	Upp2	0.847518	0.079607	0.0216853	TRUE	UP
TC0200002961.mm.2	Pfkfb3	0.787011	0.0844436	0.0234448	TRUE	UP
TC1800000301.mm.2	Egr1	1.08315	0.087265	0.0244748	TRUE	UP
TC0200004251.mm.2	Prrg4	0.592772	0.0876476	0.0246225	TRUE	UP
TC0500001464.mm.2	Aacs	1.03996	0.0930496	0.0265977	TRUE	UP
TC1200001460.mm.2	Lpin1	0.943007	0.0978611	0.0283236	TRUE	UP
TC0100000626.mm.2	Gpbar1	-0.255091	0.100054	0.0291654	FALSE	NO CHANGE
TC0200002788.mm.2	Gata5os	-0.293333	0.100283	0.0292394	FALSE	NO CHANGE
TC0900002307.mm.2	Acat1	-0.225906	0.100283	0.0292454	FALSE	NO CHANGE
TC0200000897.mm.2	Tanc1	0.33096	0.100283	0.0292459	FALSE	NO CHANGE
TC1200000358.mm.2	Gm7008	0.239275	0.100421	0.0292906	FALSE	NO CHANGE
TC1100001529.mm.2	Mrpl10	-0.180688	0.100425	0.0292962	FALSE	NO CHANGE
TC1000001192.mm.2	Epyc	-0.261612	0.100479	0.0293165	FALSE	NO CHANGE
TC1000000261.mm.2	Soga3	-0.25375	0.100555	0.0293433	FALSE	NO CHANGE
TC0200003239.mm.2	Barhl1	-0.174692	0.100594	0.0293591	FALSE	NO CHANGE
TC0700002216.mm.2	Zim1	-0.25096	0.100679	0.0293885	FALSE	NO CHANGE
TC1400001821.mm.2	Gm3573	-0.328678	0.10087	0.0294487	FALSE	NO CHANGE
TC0500001764.mm.2	Arpc1b	0.356757	0.100904	0.0294631	FALSE	NO CHANGE
TC0900001366.mm.2	6430571L13Rik	-0.193025	0.100991	0.0294932	FALSE	NO CHANGE
TC0900001652.mm.2	Kif15	0.328732	0.100992	0.029498	FALSE	NO CHANGE
TC0700002935.mm.2	Gm17768	-0.326413	0.101203	0.0295644	FALSE	NO CHANGE
TC1400000937.mm.2	Nuggc	0.239493	0.101256	0.0295842	FALSE	NO CHANGE
TC1400001200.mm.2	Ndfip2	0.203261	0.101307	0.0296068	FALSE	NO CHANGE
TC0200004528.mm.2	Cep152	0.351685	0.101307	0.0296084	FALSE	NO CHANGE
TC0400000164.mm.2	Rmdn1	0.220236	0.101395	0.0296385	FALSE	NO CHANGE
TC1300001669.mm.2	Acot13	0.165254	0.101523	0.0296805	FALSE	NO CHANGE
TC0800000695.mm.2	Nat3	0.306522	0.101548	0.0296946	FALSE	NO CHANGE
TC1300001622.mm.2	Abt1	-0.22	0.101548	0.0296988	FALSE	NO CHANGE
TC1100001264.mm.2	Wfdc17	0.506594	0.101548	0.0297017	FALSE	NO CHANGE
TC0200004048.mm.2	Olfr1226	-0.336576	0.1016	0.0297214	FALSE	NO CHANGE
TC0900002300.mm.2	AI593442	-0.252391	0.101641	0.0297379	FALSE	NO CHANGE
TC1100002119.mm.2	Uqcr10	0.278877	0.101719	0.0297655	FALSE	NO CHANGE
TC1000002655.mm.2	Gas2l3	0.28913	0.101853	0.0298091	FALSE	NO CHANGE
TC0800002108.mm.2	Mtmr7	0.304004	0.101939	0.029839	FALSE	NO CHANGE
TC0X00000077.mm.2	Gm10490	0.305344	0.101964	0.0298507	FALSE	NO CHANGE
TC0200004111.mm.2	Ddb2	0.220489	0.101993	0.0298639	FALSE	NO CHANGE
TC1100000919.mm.2	Sox15	-0.26788	0.102079	0.0298977	FALSE	NO CHANGE
TC1400000195.mm.2	Kat6b	-0.275109	0.102079	0.0298983	FALSE	NO CHANGE
TC0400003148.mm.2	Gm10577	-0.252065	0.102103	0.0299098	FALSE	NO CHANGE
TC0200004753.mm.2	Gm5535	-0.303551	0.102157	0.0299304	FALSE	NO CHANGE
TC0100002813.mm.2	Olfr1415	-0.30846	0.10229	0.0299741	FALSE	NO CHANGE
TC1100003593.mm.2	Ngfr	-0.226866	0.102311	0.0299848	FALSE	NO CHANGE
TC0500002753.mm.2	Naaa	0.366576	0.102344	0.0300047	FALSE	NO CHANGE
TC1200001749.mm.2	Eapp	-0.22462	0.102344	0.0300088	FALSE	NO CHANGE
TC0600000694.mm.2	Vmn1r19	-0.378913	0.102344	0.0300123	FALSE	NO CHANGE
TC0700000292.mm.2	Gpr4	0.330018	0.102344	0.0300129	FALSE	NO CHANGE
TC0100002236.mm.2	Tbc1d8	-0.251703	0.102444	0.0300466	FALSE	NO CHANGE
TC0X00000106.mm.2	4930402K13Rik	0.286486	0.102616	0.0301019	FALSE	NO CHANGE
TC1200001660.mm.2	Scin	-0.325707	0.102623	0.0301084	FALSE	NO CHANGE
TC0600001126.mm.2	Fam19a1	-0.362355	0.102627	0.0301157	FALSE	NO CHANGE
TC0X00000316.mm.2	Il13ra1	0.359004	0.102627	0.0301189	FALSE	NO CHANGE
TC0X00002762.mm.2	Dmrtc1a	-0.24	0.102645	0.0301287	FALSE	NO CHANGE
TC0300000129.mm.2	Dnajc5b	-0.325236	0.102818	0.0301842	FALSE	NO CHANGE
TC0700001931.mm.2	Gpr26	-0.263514	0.102833	0.0301933	FALSE	NO CHANGE
TC0700002637.mm.2	Erich4	-0.211775	0.10295	0.030236	FALSE	NO CHANGE
TC0300002869.mm.2	Usp53	-0.232409	0.10295	0.0302367	FALSE	NO CHANGE
TC0300001173.mm.2	Col11a1	-0.24712	0.102962	0.030245	FALSE	NO CHANGE
TC1200001899.mm.2	L3hypdh	-0.232681	0.102989	0.0302576	FALSE	NO CHANGE
TC1800000370.mm.2	Pcdhb14	0.258986	0.103024	0.0302736	FALSE	NO CHANGE
TC0200000600.mm.2	Rpl12; Snora65	-0.182065	0.103024	0.0302773	FALSE	NO CHANGE
TC0200005186.mm.2	B4galt5	0.564257	0.103062	0.030293	FALSE	NO CHANGE
TC0900001895.mm.2	Zfp653	-0.34154	0.103201	0.0303386	FALSE	NO CHANGE
TC0700004148.mm.2	Sox6	0.293949	0.103252	0.030358	FALSE	NO CHANGE
TC1800000503.mm.2	Dmxl1	0.214746	0.103499	0.0304354	FALSE	NO CHANGE
TC1300002062.mm.2	Dok3	0.366866	0.103633	0.0304795	FALSE	NO CHANGE
TC1100000831.mm.2	Hs3st3a1	0.287862	0.103731	0.0305129	FALSE	NO CHANGE
TC1800000658.mm.2	St8sia3	0.385725	0.103731	0.0305176	FALSE	NO CHANGE
TC1600000434.mm.2	Wdr53	-0.30462	0.103785	0.0305383	FALSE	NO CHANGE
TC0200004458.mm.2	Vps39	0.208967	0.103962	0.0305953	FALSE	NO CHANGE
TC0200000612.mm.2	Mapkap1	0.200888	0.103962	0.0305996	FALSE	NO CHANGE
TC1100002907.mm.2	Aldh3a2	-0.333333	0.103996	0.0306142	FALSE	NO CHANGE
TC0700004288.mm.2	Nupr1	0.357754	0.104148	0.0306638	FALSE	NO CHANGE
TC1300000791.mm.2	Gm10775	-0.160453	0.104149	0.0306731	FALSE	NO CHANGE
TC1700000233.mm.2	Vmn2r99	-0.311902	0.104149	0.0306736	FALSE	NO CHANGE
TC1900000801.mm.2	Nhlrc2	-0.280344	0.104157	0.0306806	FALSE	NO CHANGE
TC0700004617.mm.2	Adck4	0.344076	0.104286	0.0307275	FALSE	NO CHANGE
TC0500001025.mm.2	Spp1	0.630163	0.104286	0.0307278	FALSE	NO CHANGE
TC0800001551.mm.2	Sprtn	-0.237101	0.104359	0.0307542	FALSE	NO CHANGE
TC1900000931.mm.2	Rbm4; Rbm14; Gm21992	-0.273297	0.104375	0.0307635	FALSE	NO CHANGE
TC1500001973.mm.2	Pacsin2	-0.221522	0.104423	0.0307825	FALSE	NO CHANGE
TC0X00000069.mm.2	Gripap1	0.212464	0.104555	0.030826	FALSE	NO CHANGE
TC0200002887.mm.2	Proser2	0.329457	0.104601	0.0308442	FALSE	NO CHANGE
TC0500003305.mm.2	Zfp11	0.288116	0.104736	0.0308888	FALSE	NO CHANGE
TC0900001470.mm.2	Prss44	-0.23029	0.104774	0.0309046	FALSE	NO CHANGE
TC1900000452.mm.2	Uhrf2	-0.206486	0.104775	0.030913	FALSE	NO CHANGE
TC1000001022.mm.2	Polr3b	0.233623	0.104775	0.0309145	FALSE	NO CHANGE
TC0600002353.mm.2	Pyurf	-0.258007	0.104789	0.0309232	FALSE	NO CHANGE
TC1500001753.mm.2	Pycrl	-0.231341	0.104861	0.0309492	FALSE	NO CHANGE
TC0500002280.mm.2	Nsg1	-0.228895	0.104908	0.0309727	FALSE	NO CHANGE
TC0400003296.mm.2	Skint5	-0.276902	0.104908	0.0309788	FALSE	NO CHANGE
TC0900002023.mm.2	Gm17252	-0.286014	0.104908	0.0309811	FALSE	NO CHANGE
TC0200002403.mm.2	1110008F13Rik	-0.136087	0.104908	0.0309819	FALSE	NO CHANGE
TC0800002725.mm.2	Bbs2	-0.287192	0.105013	0.0310177	FALSE	NO CHANGE
TC0800002131.mm.2	Adam26b	-0.275725	0.105119	0.0310538	FALSE	NO CHANGE
TC1000002478.mm.2	Rnf126	-0.224511	0.105131	0.031062	FALSE	NO CHANGE
TC0400001391.mm.2	Hpcal4	-0.325254	0.105182	0.0310818	FALSE	NO CHANGE
TC0200000626.mm.2	Cutal	-0.29529	0.105214	0.0310959	FALSE	NO CHANGE
TC0300001378.mm.2	Slc39a8	-0.224692	0.105299	0.031126	FALSE	NO CHANGE
TC1600000307.mm.2	Senp2	0.250616	0.105409	0.0311633	FALSE	NO CHANGE
TC1000000469.mm.2	Nus1	0.25596	0.105435	0.0311758	FALSE	NO CHANGE
TC1200001366.mm.2	Fkbp1b	0.265562	0.10548	0.0311937	FALSE	NO CHANGE
TC0600001101.mm.2	Gm15737	-0.270163	0.10551	0.0312073	FALSE	NO CHANGE
TC1900000600.mm.2	Pgam1	-0.258406	0.105514	0.0312133	FALSE	NO CHANGE
TC0100001349.mm.2	3110040M04Rik	-0.215018	0.10552	0.0312197	FALSE	NO CHANGE
TC0700001117.mm.2	Gm20331	-0.337391	0.105579	0.0312419	FALSE	NO CHANGE
TC0600002582.mm.2	Tex261	0.17087	0.105595	0.0312516	FALSE	NO CHANGE
TC1400000556.mm.2	Olfr740	-0.285435	0.105595	0.0312563	FALSE	NO CHANGE
TC1000003229.mm.2	Vmn2r84	-0.321286	0.105597	0.0312616	FALSE	NO CHANGE
TC0900002310.mm.2	Rab39	0.260417	0.105607	0.0312693	FALSE	NO CHANGE
TC0400001224.mm.2	Cyp4a30b	-0.260634	0.105725	0.0313089	FALSE	NO CHANGE
TC0200003997.mm.2	Olfr1154	-0.383587	0.105835	0.0313463	FALSE	NO CHANGE
TC0200002759.mm.2	Fam217b	0.218188	0.105943	0.0313832	FALSE	NO CHANGE
TC1200000700.mm.2	Gphn	-0.154728	0.106043	0.0314174	FALSE	NO CHANGE
TC1400002128.mm.2	Pspc1	-0.242446	0.106183	0.0314637	FALSE	NO CHANGE
TC0500003023.mm.2	Myo18b	-0.187754	0.106273	0.0314993	FALSE	NO CHANGE
TC0600001729.mm.2	Sspn	-0.28029	0.106273	0.0315001	FALSE	NO CHANGE
TC0200000967.mm.2	Gm21830	-0.320072	0.106315	0.0315173	FALSE	NO CHANGE
TC0700003896.mm.2	Olfr616	-0.314022	0.106399	0.031547	FALSE	NO CHANGE
TC1100001886.mm.2	Slc9a3r1	0.21529	0.106405	0.0315534	FALSE	NO CHANGE
TC1200001243.mm.2	Trmt61a	0.28183	0.106431	0.0315659	FALSE	NO CHANGE
TC1700001303.mm.2	Rhoq	0.270344	0.106434	0.0315718	FALSE	NO CHANGE
TC1500002320.mm.2	Gtsf1	0.26192	0.106502	0.0315965	FALSE	NO CHANGE
TC0400000103.mm.2	Rbm12b2	-0.209783	0.106672	0.0316518	FALSE	NO CHANGE
TC0100001018.mm.2	Phlpp1	-0.267174	0.106723	0.0316718	FALSE	NO CHANGE
TC1700002430.mm.2	Gm10495	0.171902	0.106791	0.0316989	FALSE	NO CHANGE
TC1100003697.mm.2	Smarce1	0.198641	0.106791	0.0317017	FALSE	NO CHANGE
TC0200004235.mm.2	4931422A03Rik	-0.251848	0.106912	0.0317424	FALSE	NO CHANGE
TC0600002176.mm.2	Tcaf3	-0.263895	0.106993	0.0317713	FALSE	NO CHANGE
TC1300001831.mm.2	Gm10129	-0.197518	0.107117	0.0318129	FALSE	NO CHANGE
TC1800001186.mm.2	Nrg2	-0.281667	0.107198	0.0318478	FALSE	NO CHANGE
TC1800001171.mm.2	Sil1	-0.247971	0.107198	0.0318512	FALSE	NO CHANGE
TC0200004978.mm.2	Gdf5	-0.245652	0.107198	0.0318515	FALSE	NO CHANGE
TC0500001649.mm.2	Lamtor4	-0.253406	0.107226	0.0318645	FALSE	NO CHANGE
TC0900003172.mm.2	Cnot10	-0.149221	0.107329	0.0319001	FALSE	NO CHANGE
TC0500003605.mm.2	1700001J03Rik	-0.338605	0.107332	0.0319057	FALSE	NO CHANGE
TC0700004557.mm.2	Krtap5-2	-0.306685	0.107373	0.0319226	FALSE	NO CHANGE
TC0300000089.mm.2	Slc7a12	-0.22837	0.10744	0.03195	FALSE	NO CHANGE
TC0700003899.mm.2	Olfr622	-0.325453	0.10744	0.0319522	FALSE	NO CHANGE
TC0900001114.mm.2	Dopey1	-0.290507	0.107511	0.0319784	FALSE	NO CHANGE
TC1600000765.mm.2	Cldnd1	0.256866	0.107636	0.0320219	FALSE	NO CHANGE
TC0700001494.mm.2	Olfr606	-0.272409	0.107636	0.0320291	FALSE	NO CHANGE
TC1400002406.mm.2	Lrch1	-0.257283	0.107636	0.0320299	FALSE	NO CHANGE
TC0200001900.mm.2	Usp8	0.160344	0.107739	0.0320654	FALSE	NO CHANGE
TC1300002274.mm.2	Papd7	0.369257	0.107839	0.0321058	FALSE	NO CHANGE
TC1700001166.mm.2	Ltbp1	0.224293	0.107839	0.0321083	FALSE	NO CHANGE
TC0500001818.mm.2	Pomp	0.154004	0.107839	0.0321097	FALSE	NO CHANGE
TC0100001028.mm.2	Serpinb11	-0.267754	0.107972	0.0321542	FALSE	NO CHANGE
TC1500002170.mm.2	Zfp641	0.269565	0.108048	0.0321819	FALSE	NO CHANGE
TC1800000526.mm.2	1700034E13Rik	-0.281902	0.108218	0.0322479	FALSE	NO CHANGE
TC0300000823.mm.2	Sprr2b	-0.26808	0.108218	0.032249	FALSE	NO CHANGE
TC0200001776.mm.2	Nusap1	0.407681	0.108218	0.032251	FALSE	NO CHANGE
TC1500002092.mm.2	Gxylt1	-0.199493	0.108218	0.032252	FALSE	NO CHANGE
TC0X00003067.mm.2	Rbm41	0.285851	0.108253	0.0322673	FALSE	NO CHANGE
TC0500000363.mm.2	Whsc1	-0.228134	0.108508	0.032348	FALSE	NO CHANGE
TC0X00000074.mm.2	Pim2	0.282283	0.108781	0.0324343	FALSE	NO CHANGE
TC0700002011.mm.2	Olfr527	-0.25308	0.108806	0.0324468	FALSE	NO CHANGE
TC1400001971.mm.2	Olfr724	-0.311558	0.10882	0.0324559	FALSE	NO CHANGE
TC0100003071.mm.2	Gm10188	-0.262083	0.108855	0.0324713	FALSE	NO CHANGE
TC0800000271.mm.2	Thsd1	-0.281467	0.10895	0.0325046	FALSE	NO CHANGE
TC1300001540.mm.2	Zscan26	-0.182446	0.10896	0.0325134	FALSE	NO CHANGE
TC0100003069.mm.2	Cdk18	-0.353822	0.10896	0.0325171	FALSE	NO CHANGE
TC1600001178.mm.2	Usp7	-0.175091	0.109028	0.0325455	FALSE	NO CHANGE
TC1400001948.mm.2	Otx2	-0.231938	0.109028	0.0325474	FALSE	NO CHANGE
TC0300000404.mm.2	Gm10985	-0.363152	0.109132	0.0325833	FALSE	NO CHANGE
TC1700001596.mm.2	Mmp25	0.262482	0.109138	0.0325901	FALSE	NO CHANGE
TC0500002311.mm.2	Gm7854	-0.220362	0.109243	0.0326263	FALSE	NO CHANGE
TC1100000995.mm.2	Mybbp1a	-0.233768	0.109398	0.0326776	FALSE	NO CHANGE
TC1900000577.mm.2	Cc2d2b	-0.263116	0.109477	0.0327062	FALSE	NO CHANGE
TC1900001105.mm.2	Tmem216	-0.304873	0.109521	0.0327258	FALSE	NO CHANGE
TC0700003977.mm.2	Fam160a2	-0.227736	0.109521	0.0327296	FALSE	NO CHANGE
TC0700001383.mm.2	Map6	-0.305036	0.109521	0.0327341	FALSE	NO CHANGE
TC0200005016.mm.2	Mroh8	-0.329366	0.109554	0.0327489	FALSE	NO CHANGE
TC1400002290.mm.2	Cdca2	0.27567	0.109569	0.0327583	FALSE	NO CHANGE
TC0300000635.mm.2	Ctso	0.179928	0.109724	0.0328094	FALSE	NO CHANGE
TC0700000529.mm.2	4932431P20Rik	0.206848	0.109724	0.0328145	FALSE	NO CHANGE
TC0200005054.mm.2	Gm14221	-0.292083	0.10978	0.0328361	FALSE	NO CHANGE
TC1700000829.mm.2	Tnfrsf21	0.299928	0.109789	0.0328438	FALSE	NO CHANGE
TC0600000463.mm.2	Tas2r126	-0.268822	0.109811	0.0328629	FALSE	NO CHANGE
TC0700004404.mm.2	Chst15	0.221612	0.109811	0.0328636	FALSE	NO CHANGE
TC0200000482.mm.2	Mrps2	0.178514	0.109811	0.0328652	FALSE	NO CHANGE
TC1200002493.mm.2	Wdr60	-0.26471	0.109854	0.032886	FALSE	NO CHANGE
TC1500001069.mm.2	6030408B16Rik	-0.25558	0.109854	0.0328879	FALSE	NO CHANGE
TC1100000531.mm.2	Rnf130	-0.18413	0.109855	0.0328932	FALSE	NO CHANGE
TC0500001073.mm.2	Brdt	-0.287826	0.109877	0.0329083	FALSE	NO CHANGE
TC0700003865.mm.2	Trim68	0.242663	0.109877	0.0329098	FALSE	NO CHANGE
TC1800000029.mm.2	Zeb1	0.21846	0.109938	0.0329426	FALSE	NO CHANGE
TC1300000089.mm.2	Lyst	0.326051	0.109938	0.0329433	FALSE	NO CHANGE
TC1400001961.mm.2	Slc35f4	-0.214185	0.109938	0.0329449	FALSE	NO CHANGE
TC0700002669.mm.2	Pld3	0.268043	0.109938	0.0329557	FALSE	NO CHANGE
TC1500001212.mm.2	Rxfp3	-0.199058	0.109938	0.0329588	FALSE	NO CHANGE
TC0900000200.mm.2	Carm1	0.241232	0.109938	0.0329595	FALSE	NO CHANGE
TC0900001884.mm.2	Kank2	-0.27279	0.109938	0.0329625	FALSE	NO CHANGE
TC0X00003209.mm.2	Kctd12b	0.298841	0.109987	0.0329822	FALSE	NO CHANGE
TC1100003455.mm.2	Cltc	0.156232	0.110038	0.033003	FALSE	NO CHANGE
TC0200001972.mm.2	Nop56; Snord57	0.52154	0.110038	0.0330081	FALSE	NO CHANGE
TC1900001600.mm.2	Cuedc2	0.244366	0.110038	0.0330123	FALSE	NO CHANGE
TC0900000606.mm.2	Fdxacb1	-0.246667	0.110071	0.0330271	FALSE	NO CHANGE
TC1100000472.mm.2	Fam71b	-0.277844	0.110154	0.0330571	FALSE	NO CHANGE
TC0600000350.mm.2	Chrm2	-0.275435	0.110176	0.0330686	FALSE	NO CHANGE
TC0300003210.mm.2	Schip1; Gm21949	0.29817	0.110186	0.0330766	FALSE	NO CHANGE
TC1100003410.mm.2	Aatf	-0.195978	0.110214	0.03309	FALSE	NO CHANGE
TC0900002472.mm.2	Map2k5	0.185996	0.11026	0.0331089	FALSE	NO CHANGE
TC1100002654.mm.2	Btnl9	0.368279	0.110452	0.0331742	FALSE	NO CHANGE
TC0800003102.mm.2	Dbndd1	-0.19837	0.110452	0.0331779	FALSE	NO CHANGE
TC0200000354.mm.2	Pdss1	0.30904	0.110452	0.0331814	FALSE	NO CHANGE
TC1700001638.mm.2	Tbl3	-0.21942	0.110455	0.0331872	FALSE	NO CHANGE
TC0100000951.mm.2	Gm6086	-0.164366	0.110493	0.0332035	FALSE	NO CHANGE
TC0500000842.mm.2	Ppbp	0.558804	0.110612	0.0332443	FALSE	NO CHANGE
TC1100001670.mm.2	Dhx8	0.188333	0.110674	0.0332679	FALSE	NO CHANGE
TC1600000510.mm.2	Gm5416	-0.268261	0.110733	0.0332922	FALSE	NO CHANGE
TC0200001262.mm.2	Olfr1031	-0.269239	0.110733	0.0332958	FALSE	NO CHANGE
TC0200005018.mm.2	Ghrh	-0.17837	0.110739	0.0333024	FALSE	NO CHANGE
TC1000001689.mm.2	Gm10945	-0.341975	0.110774	0.0333181	FALSE	NO CHANGE
TC1100001018.mm.2	Shpk	-0.253514	0.110788	0.0333271	FALSE	NO CHANGE
TC0200001553.mm.2	A930018P22Rik	-0.255036	0.110888	0.0333623	FALSE	NO CHANGE
TC0400003514.mm.2	Maneal	-0.212355	0.110889	0.0333719	FALSE	NO CHANGE
TC1000002458.mm.2	Syde1	0.23288	0.110889	0.0333727	FALSE	NO CHANGE
TC0700002828.mm.2	Gpi1	0.278424	0.110913	0.0333896	FALSE	NO CHANGE
TC1200001231.mm.2	Traf3	0.273098	0.110913	0.0333898	FALSE	NO CHANGE
TC0700004057.mm.2	Olfr504	-0.292627	0.111014	0.0334252	FALSE	NO CHANGE
TC1400001604.mm.2	Plac9a	0.299855	0.111096	0.033455	FALSE	NO CHANGE
TC1000003143.mm.2	Slc39a5	0.213732	0.111187	0.0334874	FALSE	NO CHANGE
TC0300000656.mm.2	Tmem154	0.257192	0.111187	0.0334968	FALSE	NO CHANGE
TC0700002421.mm.2	C5ar2	0.299094	0.111187	0.0334973	FALSE	NO CHANGE
TC1000002313.mm.2	Ado	0.27471	0.111258	0.0335237	FALSE	NO CHANGE
TC0X00002631.mm.2	Pola1	0.294239	0.111323	0.0335483	FALSE	NO CHANGE
TC0100001812.mm.2	Ush2a	-0.27913	0.111435	0.0335872	FALSE	NO CHANGE
TC1400001621.mm.2	Slmap	0.238514	0.111472	0.0336033	FALSE	NO CHANGE
TC0100003397.mm.2	Prrc2c	0.19096	0.111628	0.0336554	FALSE	NO CHANGE
TC0200003912.mm.2	Olfr1037	-0.324692	0.111634	0.0336631	FALSE	NO CHANGE
TC1000000907.mm.2	Gm10778	-0.267953	0.111634	0.0336721	FALSE	NO CHANGE
TC1000000909.mm.2	Gm10778	-0.267953	0.111634	0.0336721	FALSE	NO CHANGE
TC0900003095.mm.2	Fbxw27	-0.26846	0.11165	0.0336819	FALSE	NO CHANGE
TC0300001999.mm.2	Nbea	0.316866	0.111669	0.0336929	FALSE	NO CHANGE
TC0200005328.mm.2	Gm14393	-0.306159	0.111793	0.0337354	FALSE	NO CHANGE
TC0300001841.mm.2	Dcun1d1	-0.194746	0.111861	0.0337609	FALSE	NO CHANGE
TC0400003170.mm.2	Insl5	-0.191757	0.111883	0.0337726	FALSE	NO CHANGE
TC1500000731.mm.2	Tef	-0.522663	0.111905	0.0337841	FALSE	NO CHANGE
TC1700000580.mm.2	Zfp955b	-0.219438	0.111906	0.0337898	FALSE	NO CHANGE
TC0400000712.mm.2	Zfp618	-0.270308	0.111906	0.0337987	FALSE	NO CHANGE
TC0800001745.mm.2	Coprs	-0.211431	0.111906	0.0337995	FALSE	NO CHANGE
TC1100004187.mm.2	Nptx1	-0.277355	0.112073	0.0338578	FALSE	NO CHANGE
TC0400001153.mm.2	3110021N24Rik	-0.278225	0.112073	0.0338609	FALSE	NO CHANGE
TC0700001572.mm.2	Olfr716	-0.194873	0.112073	0.0338652	FALSE	NO CHANGE
TC1000003035.mm.2	Lemd3	0.206377	0.112104	0.0338795	FALSE	NO CHANGE
TC1100003529.mm.2	Hlf	-0.363569	0.112138	0.0338949	FALSE	NO CHANGE
TC1400002193.mm.2	Spryd7	-0.282627	0.112161	0.0339068	FALSE	NO CHANGE
TC0500002170.mm.2	Slc5a6	-0.442699	0.112217	0.0339289	FALSE	NO CHANGE
TC0X00001502.mm.2	Pfkfb1	0.360236	0.112238	0.0339403	FALSE	NO CHANGE
TC1700000707.mm.2	Ppp1r18	0.295906	0.112259	0.0339516	FALSE	NO CHANGE
TC1000001897.mm.2	Arg1	0.179004	0.112284	0.0339645	FALSE	NO CHANGE
TC1100002694.mm.2	Hnrnpab	0.143732	0.112336	0.0339851	FALSE	NO CHANGE
TC1000002611.mm.2	Prdm4	0.310254	0.112362	0.0340002	FALSE	NO CHANGE
TC0700002042.mm.2	Lrrc56	-0.29942	0.112362	0.0340031	FALSE	NO CHANGE
TC1600001130.mm.2	Srl	-0.26087	0.112403	0.0340235	FALSE	NO CHANGE
TC1100003192.mm.2	Olfr411	-0.308188	0.112403	0.0340285	FALSE	NO CHANGE
TC1900001730.mm.2	Vax1	-0.231739	0.112403	0.0340307	FALSE	NO CHANGE
TC1900000889.mm.2	Ndufs8	0.216214	0.112472	0.0340568	FALSE	NO CHANGE
TC1300001836.mm.2	Bloc1s5	-0.284692	0.1125	0.0340726	FALSE	NO CHANGE
TC0200000550.mm.2	Hmcn2	-0.212174	0.1125	0.0340752	FALSE	NO CHANGE
TC1000002438.mm.2	Pfkl	-0.280978	0.112501	0.0340808	FALSE	NO CHANGE
TC1200002060.mm.2	Gm17673	-0.16163	0.112533	0.0340954	FALSE	NO CHANGE
TC1900000943.mm.2	Peli3	-0.238261	0.112554	0.0341068	FALSE	NO CHANGE
TC0900001513.mm.2	Tmppe; Glb1	-0.23625	0.112556	0.0341163	FALSE	NO CHANGE
TC1900000448.mm.2	Il33	0.245906	0.112556	0.0341176	FALSE	NO CHANGE
TC0700001997.mm.2	Kndc1	-0.270761	0.112571	0.0341305	FALSE	NO CHANGE
TC1900000774.mm.2	Tectb; Mir6715	-0.235054	0.112571	0.0341355	FALSE	NO CHANGE
TC0300000802.mm.2	S100a16	-0.269565	0.112571	0.0341372	FALSE	NO CHANGE
TC1100003551.mm.2	Utp18	-0.25058	0.112581	0.0341453	FALSE	NO CHANGE
TC0600002693.mm.2	Gm839	-0.31654	0.112648	0.0341712	FALSE	NO CHANGE
TC0900000403.mm.2	Olfr906	-0.289837	0.112648	0.0341761	FALSE	NO CHANGE
TC0100002188.mm.2	Fam178b	-0.158116	0.112648	0.0341808	FALSE	NO CHANGE
TC0400004170.mm.2	Agrn	0.283623	0.112733	0.0342119	FALSE	NO CHANGE
TC1400001662.mm.2	Itih1	-0.192989	0.112958	0.0342851	FALSE	NO CHANGE
TC0X00003228.mm.2	Magea3	-0.245072	0.112985	0.0342986	FALSE	NO CHANGE
TC1000001792.mm.2	Gje1	-0.240344	0.113071	0.0343305	FALSE	NO CHANGE
TC0100000440.mm.2	Casp8	0.329293	0.113071	0.034339	FALSE	NO CHANGE
TC0800002447.mm.2	Cyp4f18	-0.213768	0.113071	0.0343398	FALSE	NO CHANGE
TC1500001431.mm.2	Lrp12	0.234982	0.113141	0.0343663	FALSE	NO CHANGE
TC1800000714.mm.2	Ldlrad4	-0.408496	0.113185	0.0343847	FALSE	NO CHANGE
TC1700001014.mm.2	Ranbp3	-0.175489	0.113229	0.0344032	FALSE	NO CHANGE
TC1100001040.mm.2	Olfr59	0.207844	0.113262	0.0344184	FALSE	NO CHANGE
TC0200002095.mm.2	Ndufaf5	0.291413	0.113264	0.0344246	FALSE	NO CHANGE
TC0300000494.mm.2	Arhgef26	-0.399638	0.113264	0.0344292	FALSE	NO CHANGE
TC0500000949.mm.2	1700007G11Rik	-0.302138	0.113286	0.034441	FALSE	NO CHANGE
TC0300003250.mm.2	Slc35a3	-0.238116	0.113334	0.0344606	FALSE	NO CHANGE
TC0Y00000259.mm.2	Gm21874	-0.274819	0.113446	0.0345037	FALSE	NO CHANGE
TC0700003990.mm.2	Tpp1	0.219783	0.113446	0.034505	FALSE	NO CHANGE
TC0500003411.mm.2	Ssc4d	-0.339076	0.113571	0.034548	FALSE	NO CHANGE
TC0400003460.mm.2	Gm12888	-0.316051	0.113623	0.0345688	FALSE	NO CHANGE
TC1900000714.mm.2	Ina	0.185018	0.113779	0.0346262	FALSE	NO CHANGE
TC0500003496.mm.2	Micall2	0.254638	0.113779	0.0346267	FALSE	NO CHANGE
TC0900002274.mm.2	Dixdc1	-0.385	0.113999	0.0346987	FALSE	NO CHANGE
TC0200005347.mm.2	Gm11009	-0.289764	0.114023	0.0347112	FALSE	NO CHANGE
TC0400001161.mm.2	Nrd1; Mir761	0.162283	0.114064	0.0347291	FALSE	NO CHANGE
TC0700002165.mm.2	Tmem86b	0.275072	0.114064	0.0347338	FALSE	NO CHANGE
TC0400003011.mm.2	Ifna16	-0.281522	0.114117	0.0347551	FALSE	NO CHANGE
TC1900000706.mm.2	Wbp1l	-0.16	0.11418	0.0347838	FALSE	NO CHANGE
TC1700001137.mm.2	Spdya; Mettl4-ps1	-0.263514	0.11418	0.0347846	FALSE	NO CHANGE
TSUnmapped00000011.mm.2	Pld6	-0.332409	0.114185	0.0347912	FALSE	NO CHANGE
TC0700000822.mm.2	Tsks	-0.268678	0.114239	0.034813	FALSE	NO CHANGE
TC1400000241.mm.2	Zmiz1	-0.239964	0.114344	0.0348501	FALSE	NO CHANGE
TC1500001465.mm.2	Nudcd1	-0.19817	0.114354	0.0348583	FALSE	NO CHANGE
TC1300001793.mm.2	Eci3	-0.201667	0.114624	0.0349461	FALSE	NO CHANGE
TC0100000215.mm.2	Rab23	0.2675	0.114624	0.0349639	FALSE	NO CHANGE
TC0700003989.mm.2	Taf10	-0.168496	0.114624	0.0349639	FALSE	NO CHANGE
TC1500001830.mm.2	Tex33	-0.225471	0.114624	0.034966	FALSE	NO CHANGE
TC0100003776.mm.2	Kctd3	0.331884	0.114624	0.0349697	FALSE	NO CHANGE
TC0200002836.mm.2	Pcmtd2	-0.371467	0.114624	0.0349716	FALSE	NO CHANGE
TC0900000515.mm.2	Ddx6	-0.22462	0.114654	0.0349857	FALSE	NO CHANGE
TC1100001684.mm.2	BC030867	-0.237663	0.11479	0.0350324	FALSE	NO CHANGE
TC0200001627.mm.2	Lgr4	0.306685	0.114915	0.0350758	FALSE	NO CHANGE
TC0200003205.mm.2	Surf4	0.110707	0.114975	0.0350992	FALSE	NO CHANGE
TC0700004495.mm.2	Sprn	0.236178	0.115145	0.0351569	FALSE	NO CHANGE
TC0500002119.mm.2	Gm1979	0.333025	0.115145	0.0351657	FALSE	NO CHANGE
TC0400001233.mm.2	Efcab14	0.201359	0.115145	0.0351667	FALSE	NO CHANGE
TC0700000400.mm.2	Dmrtc2	-0.276431	0.11519	0.0351856	FALSE	NO CHANGE
TC1400001718.mm.2	A630023A22Rik	-0.25663	0.115234	0.0352042	FALSE	NO CHANGE
TC1300000781.mm.2	Cdk20	0.347899	0.115252	0.0352151	FALSE	NO CHANGE
TC0800002802.mm.2	Dync1li2	0.135797	0.115459	0.0352834	FALSE	NO CHANGE
TC1800000199.mm.2	Elp2	-0.187663	0.115542	0.0353139	FALSE	NO CHANGE
TC0200001115.mm.2	Hnrnpa3; Gm6793	-0.22529	0.115606	0.0353389	FALSE	NO CHANGE
TC1300000638.mm.2	Tspan17	-0.299692	0.11571	0.0353758	FALSE	NO CHANGE
TC1200001289.mm.2	Adam6a	-0.274855	0.115721	0.0353844	FALSE	NO CHANGE
TC0600003071.mm.2	Apobec1	0.464656	0.115744	0.0354	FALSE	NO CHANGE
TC0Y00000063.mm.2	Gm21907	-0.385109	0.115744	0.0354018	FALSE	NO CHANGE
TC0X00002064.mm.2	Rhox4f	-0.307228	0.115848	0.0354389	FALSE	NO CHANGE
TC0500001504.mm.2	Sfswap	0.236685	0.115849	0.0354471	FALSE	NO CHANGE
TC1800001319.mm.2	Dtwd2	-0.271649	0.115849	0.0354497	FALSE	NO CHANGE
TC0200005121.mm.2	Eppin	-0.25096	0.115946	0.0354845	FALSE	NO CHANGE
TC0500001028.mm.2	BC005561	-0.279004	0.115999	0.035509	FALSE	NO CHANGE
TC0900001400.mm.2	Rhoa	0.145598	0.115999	0.0355113	FALSE	NO CHANGE
TC0200004253.mm.2	Eif3m	-0.177591	0.11615	0.0355643	FALSE	NO CHANGE
TC0300002199.mm.2	Etfdh	-0.200815	0.11615	0.0355678	FALSE	NO CHANGE
TC1300002756.mm.2	Gm21188	0.266069	0.11617	0.0355792	FALSE	NO CHANGE
TC1100001106.mm.2	Tusc5	0.221866	0.116236	0.0356048	FALSE	NO CHANGE
TC0200000872.mm.2	Galnt5	-0.306739	0.116276	0.0356221	FALSE	NO CHANGE
TC0700004628.mm.2	Prr14	0.233134	0.116282	0.0356292	FALSE	NO CHANGE
TC1800000791.mm.2	Myo5b	0.286848	0.11642	0.0356768	FALSE	NO CHANGE
TC0700002364.mm.2	Vmn1r87	-0.235163	0.116449	0.0356908	FALSE	NO CHANGE
TC1700002173.mm.2	Abcc10	0.205236	0.116551	0.0357273	FALSE	NO CHANGE
TC1000002505.mm.2	Klf16	-0.245888	0.116596	0.0357465	FALSE	NO CHANGE
TC1500001785.mm.2	Cyhr1	-0.256757	0.116623	0.03576	FALSE	NO CHANGE
TC1600000738.mm.2	Rpl24; Zbtb11	-0.180163	0.116691	0.035786	FALSE	NO CHANGE
TC1100001348.mm.2	Rnf43; 1110028F11Rik	-0.214149	0.116799	0.0358246	FALSE	NO CHANGE
TC0300000181.mm.2	Eif5a2	0.223496	0.116858	0.0358517	FALSE	NO CHANGE
TC1700001771.mm.2	4930539E08Rik	0.229402	0.116858	0.035853	FALSE	NO CHANGE
TC0200000222.mm.2	Il15ra	0.390815	0.117245	0.0359782	FALSE	NO CHANGE
TC1900000866.mm.2	Grk5	-0.582373	0.117245	0.0359841	FALSE	NO CHANGE
TC1100003961.mm.2	Cacng1	-0.266395	0.117245	0.0359877	FALSE	NO CHANGE
TC0800002680.mm.2	Aktip	-0.279674	0.117453	0.0360606	FALSE	NO CHANGE
TC0X00003429.mm.2	L1cam	-0.256775	0.117453	0.0360622	FALSE	NO CHANGE
TC1800001193.mm.2	Hbegf	-0.279638	0.117529	0.0360906	FALSE	NO CHANGE
TC1100001668.mm.2	Arl4d	0.299638	0.11765	0.0361376	FALSE	NO CHANGE
TC0600003422.mm.2	Ifltd1	-0.236957	0.11765	0.0361384	FALSE	NO CHANGE
TC0600003072.mm.2	Gdf3	0.175616	0.117651	0.0361441	FALSE	NO CHANGE
TC0100002814.mm.2	Olfr1414	-0.238043	0.117791	0.0361923	FALSE	NO CHANGE
TC1200002443.mm.2	Jag2	0.217772	0.117853	0.0362171	FALSE	NO CHANGE
TC0100002033.mm.2	Mcm3	0.421685	0.117853	0.0362222	FALSE	NO CHANGE
TC0600003166.mm.2	Dyrk4	0.220634	0.117853	0.0362275	FALSE	NO CHANGE
TC0200002833.mm.2	Tcea2	0.236322	0.11803	0.036287	FALSE	NO CHANGE
TC1700001262.mm.2	Plekhh2	-0.24279	0.118085	0.0363093	FALSE	NO CHANGE
TC1000001931.mm.2	Gm9996	-0.223043	0.118307	0.0363828	FALSE	NO CHANGE
TC0500001112.mm.2	Idua	0.193188	0.118521	0.036454	FALSE	NO CHANGE
TC1300000280.mm.2	Tdp2	-0.23058	0.11861	0.0364867	FALSE	NO CHANGE
TC0500001578.mm.2	Baz1b	0.314728	0.118652	0.0365049	FALSE	NO CHANGE
TC1100000785.mm.2	Grap	0.250236	0.118655	0.0365112	FALSE	NO CHANGE
TC0400001152.mm.2	Cc2d1b	-0.218225	0.118715	0.036535	FALSE	NO CHANGE
TC1000001594.mm.2	Apon	0.249312	0.118739	0.0365478	FALSE	NO CHANGE
TC0100000883.mm.2	Prlh	-0.292083	0.118878	0.0365959	FALSE	NO CHANGE
TC0400001994.mm.2	Uts2	0.276594	0.118964	0.0366277	FALSE	NO CHANGE
TC0600001942.mm.2	Iqub	-0.196123	0.118973	0.0366358	FALSE	NO CHANGE
TC1100001223.mm.2	Ccl8	-0.25846	0.119041	0.0366621	FALSE	NO CHANGE
TC0700004371.mm.2	Mcmbp	-0.22404	0.119042	0.036668	FALSE	NO CHANGE
TC0600002561.mm.2	Ino80b	-0.240072	0.119064	0.0366832	FALSE	NO CHANGE
TC1500000723.mm.2	Ep300	0.214384	0.119064	0.0366855	FALSE	NO CHANGE
TC1400001827.mm.2	Gm9611	-0.34067	0.119125	0.0367181	FALSE	NO CHANGE
TC0200005101.mm.2	Rims4	-0.169764	0.119125	0.0367205	FALSE	NO CHANGE
TC0300000412.mm.2	Alg5	-0.171087	0.119125	0.0367205	FALSE	NO CHANGE
TC0400002220.mm.2	Tmem67	0.366123	0.119125	0.0367255	FALSE	NO CHANGE
TC0100003123.mm.2	Elf3	0.24808	0.119194	0.0367523	FALSE	NO CHANGE
TC0800001698.mm.2	Rab20	-0.170362	0.119287	0.0367862	FALSE	NO CHANGE
TC0700002957.mm.2	Clec11a	0.234837	0.11938	0.0368202	FALSE	NO CHANGE
TC0100003373.mm.2	4930469G21Rik	-0.247772	0.119403	0.0368329	FALSE	NO CHANGE
TC1100001992.mm.2	Enpp7	-0.179221	0.119417	0.0368425	FALSE	NO CHANGE
TC0600001100.mm.2	A730049H05Rik	0.295761	0.119783	0.0369608	FALSE	NO CHANGE
TC0700003648.mm.2	Cemip	-0.217409	0.119812	0.0369752	FALSE	NO CHANGE
TC1500000787.mm.2	Parvg	0.322699	0.119813	0.036981	FALSE	NO CHANGE
TC0200000302.mm.2	Bmi1	0.263931	0.11984	0.0369947	FALSE	NO CHANGE
TC0600000455.mm.2	Tmem139	-0.276123	0.119983	0.0370442	FALSE	NO CHANGE
TC0500002182.mm.2	Ift172	-0.272663	0.120267	0.0371372	FALSE	NO CHANGE
TC0200002075.mm.2	Ankef1; BC034902	0.215562	0.120284	0.0371481	FALSE	NO CHANGE
TC0500000410.mm.2	Ccdc96	-0.225562	0.120405	0.0371907	FALSE	NO CHANGE
TC0800002023.mm.2	Leprotl1	0.240833	0.120552	0.0372417	FALSE	NO CHANGE
TC0700000280.mm.2	Mypop	0.190725	0.120645	0.0372757	FALSE	NO CHANGE
TC0400001926.mm.2	Fbxo2	-0.253406	0.120766	0.0373186	FALSE	NO CHANGE
TC1500000854.mm.2	Pim3	0.440399	0.120815	0.0373431	FALSE	NO CHANGE
TC0900002889.mm.2	Pxylp1	0.307717	0.120815	0.0373447	FALSE	NO CHANGE
TC0100003887.mm.2	Nos1ap	0.574855	0.120816	0.0373504	FALSE	NO CHANGE
TC1000002429.mm.2	Gm7138	-0.343714	0.120888	0.037378	FALSE	NO CHANGE
TC0500001577.mm.2	Bcl7b	0.169928	0.121	0.0374203	FALSE	NO CHANGE
TC1900001053.mm.2	Slc22a19	0.270598	0.121	0.0374279	FALSE	NO CHANGE
TC1000003105.mm.2	Pip4k2c	-0.17192	0.121	0.0374291	FALSE	NO CHANGE
TC0400000909.mm.2	Ifna1	-0.27288	0.121182	0.0374909	FALSE	NO CHANGE
TC1500000665.mm.2	Eif3l	-0.174873	0.121266	0.0375223	FALSE	NO CHANGE
TC0800001468.mm.2	Jph3	-0.233877	0.121314	0.0375441	FALSE	NO CHANGE
TC1200000605.mm.2	Tomm20l	-0.222065	0.121314	0.0375479	FALSE	NO CHANGE
TC0100001593.mm.2	Alyref2	-0.229855	0.121322	0.0375561	FALSE	NO CHANGE
TC0200004062.mm.2	Olfr1243	-0.293967	0.121506	0.0376185	FALSE	NO CHANGE
TC0400003360.mm.2	Btbd19	-0.280471	0.121522	0.0376319	FALSE	NO CHANGE
TC0200002099.mm.2	Macrod2	-0.309022	0.121522	0.0376342	FALSE	NO CHANGE
TC1600001974.mm.2	Adamts1	0.344565	0.121533	0.0376433	FALSE	NO CHANGE
TC1100004105.mm.2	Fbf1	-0.341033	0.121643	0.0376826	FALSE	NO CHANGE
TC0500002305.mm.2	Nkx3-2	-0.17933	0.12185	0.0377524	FALSE	NO CHANGE
TC0500003393.mm.2	Pom121	0.284022	0.121974	0.0377963	FALSE	NO CHANGE
TC0700002573.mm.2	Vmn1r159	-0.323243	0.122149	0.0378567	FALSE	NO CHANGE
TC1700000693.mm.2	Psors1c2	-0.264764	0.122149	0.0378638	FALSE	NO CHANGE
TC0100003381.mm.2	4930558K02Rik	-0.242029	0.122149	0.0378722	FALSE	NO CHANGE
TC1000001661.mm.2	Tespa1	0.283062	0.122149	0.0378723	FALSE	NO CHANGE
TC0X00000694.mm.2	Srpk3	0.24788	0.122151	0.0378839	FALSE	NO CHANGE
TC1500001891.mm.2	Pdgfb	0.250326	0.122165	0.037894	FALSE	NO CHANGE
TC1300000969.mm.2	Cetn3	-0.223696	0.122442	0.0379897	FALSE	NO CHANGE
TC1300001020.mm.2	Ssbp2	0.33904	0.122442	0.0379944	FALSE	NO CHANGE
TC0700003724.mm.2	Ccdc83	-0.312373	0.122442	0.0379965	FALSE	NO CHANGE
TC0200005454.mm.2	Rgs19	0.28596	0.122456	0.0380063	FALSE	NO CHANGE
TC0X00002400.mm.2	Cd99l2	-0.197482	0.122795	0.0381169	FALSE	NO CHANGE
TC0100002237.mm.2	Rnf149	0.207717	0.123015	0.0381909	FALSE	NO CHANGE
TC1000002018.mm.2	Wisp3	-0.306449	0.12306	0.0382102	FALSE	NO CHANGE
TC0300000227.mm.2	Ndufb5	0.197554	0.123081	0.0382224	FALSE	NO CHANGE
TC1100004100.mm.2	H3f3b	0.262482	0.12323	0.0382743	FALSE	NO CHANGE
TC1400000165.mm.2	Fam149b	-0.270507	0.123299	0.0383013	FALSE	NO CHANGE
TC0200003876.mm.2	Clp1	-0.326848	0.123346	0.0383213	FALSE	NO CHANGE
TC0200005223.mm.2	Sall4	-0.259855	0.123528	0.0383836	FALSE	NO CHANGE
TC0800001349.mm.2	Cntnap4	-0.235199	0.123579	0.038405	FALSE	NO CHANGE
TC0900000666.mm.2	Hykk	-0.378877	0.123604	0.038428	FALSE	NO CHANGE
TC0700003567.mm.2	Plin1	-0.267047	0.123604	0.0384286	FALSE	NO CHANGE
TC0800002433.mm.2	Nxnl1	-0.173062	0.123604	0.0384292	FALSE	NO CHANGE
TC0600001983.mm.2	Tnpo3	-0.215888	0.123693	0.0384627	FALSE	NO CHANGE
TC1200001299.mm.2	Vipr2	-0.160906	0.123711	0.0384736	FALSE	NO CHANGE
TC0200001002.mm.2	Nostrin	0.228406	0.123719	0.0384839	FALSE	NO CHANGE
TC1300000014.mm.2	Calm5	-0.270417	0.123719	0.0384873	FALSE	NO CHANGE
TC1000002520.mm.2	Gng7	-0.216377	0.123761	0.0385061	FALSE	NO CHANGE
TC0800000180.mm.2	Defb4	-0.251793	0.123887	0.0385536	FALSE	NO CHANGE
TC1100000341.mm.2	Sh3pxd2b	-0.235	0.123887	0.0385565	FALSE	NO CHANGE
TC1300002143.mm.2	Ctla2a	0.378841	0.123937	0.0385774	FALSE	NO CHANGE
TC0400000567.mm.2	Smc2	0.28413	0.124139	0.0386504	FALSE	NO CHANGE
TC1300000972.mm.2	Mef2c	0.276431	0.124139	0.0386517	FALSE	NO CHANGE
TC1900001147.mm.2	Olfr1419	-0.269928	0.12414	0.0386574	FALSE	NO CHANGE
TC0900002983.mm.2	Dnajc13	0.19846	0.124175	0.0386741	FALSE	NO CHANGE
TC0500002102.mm.2	Kmt2c	-0.176812	0.124297	0.0387177	FALSE	NO CHANGE
TC0500003212.mm.2	Atp2a2	0.373315	0.124337	0.0387356	FALSE	NO CHANGE
TC1300001545.mm.2	LOC102641600; Gm11273	0.213587	0.124469	0.0387894	FALSE	NO CHANGE
TC1600000192.mm.2	Cebpd	0.302283	0.124469	0.0387898	FALSE	NO CHANGE
TC0700004282.mm.2	Eif3c	0.190344	0.124469	0.0387935	FALSE	NO CHANGE
TC1300002037.mm.2	Cltb	-0.192101	0.12448	0.0388031	FALSE	NO CHANGE
TC1500000556.mm.2	Gm20654	0.212971	0.12448	0.0388082	FALSE	NO CHANGE
TC0600001344.mm.2	Kdm5a	-0.252609	0.124483	0.0388149	FALSE	NO CHANGE
TC1600001025.mm.2	Smim11	0.160163	0.124527	0.038834	FALSE	NO CHANGE
TC0800000782.mm.2	Myo9b	0.235236	0.12453	0.0388408	FALSE	NO CHANGE
TC1800001745.mm.2	Ier3ip1	-0.247572	0.124593	0.038866	FALSE	NO CHANGE
TC0600003346.mm.2	Lmo3	-0.190399	0.124626	0.0388819	FALSE	NO CHANGE
TC0X00003402.mm.2	Bhlhb9	-0.254946	0.12488	0.0389665	FALSE	NO CHANGE
TC0200003533.mm.2	Cacnb4	0.233678	0.125035	0.0390208	FALSE	NO CHANGE
TC0900000722.mm.2	Cyp11a1	-0.190634	0.125122	0.0390533	FALSE	NO CHANGE
TC0700001000.mm.2	Adamts17	0.204475	0.125291	0.0391145	FALSE	NO CHANGE
TC1500001347.mm.2	Hrsp12	0.124384	0.125291	0.0391173	FALSE	NO CHANGE
TC1400000364.mm.2	Gdf2	0.331105	0.125331	0.0391359	FALSE	NO CHANGE
TC0X00000695.mm.2	Ssr4	-0.199094	0.125331	0.0391412	FALSE	NO CHANGE
TC0600001212.mm.2	Grm7	-0.255743	0.125425	0.0391763	FALSE	NO CHANGE
TC0200004169.mm.2	Hsd17b12	-0.106576	0.1255	0.0392052	FALSE	NO CHANGE
TC0100000044.mm.2	Sgk3	0.2975	0.125598	0.0392416	FALSE	NO CHANGE
TC0900000719.mm.2	Ubl7	0.409076	0.125642	0.039261	FALSE	NO CHANGE
TC0800003193.mm.2	Irf2bp2	0.426504	0.12565	0.0392691	FALSE	NO CHANGE
TC1700000915.mm.2	AI661453	-0.199022	0.125724	0.039298	FALSE	NO CHANGE
TC0700001738.mm.2	4933427G17Rik	-0.202192	0.125744	0.0393099	FALSE	NO CHANGE
TC1000002249.mm.2	Col13a1	-0.323098	0.125798	0.0393323	FALSE	NO CHANGE
TCUn_JH58430400000005.mm.2	Pisd-ps3	0.375634	0.125811	0.0393443	FALSE	NO CHANGE
TC1200000017.mm.2	Pomc	-0.29346	0.125811	0.0393479	FALSE	NO CHANGE
TC0200002374.mm.2	Procr	0.320707	0.12605	0.0394281	FALSE	NO CHANGE
TC1800000825.mm.2	Pias2	-0.197717	0.126113	0.0394552	FALSE	NO CHANGE
TC0600002901.mm.2	Oxtr	-0.202373	0.126113	0.0394594	FALSE	NO CHANGE
TC0X00001122.mm.2	4933403O08Rik	-0.216467	0.126153	0.0394812	FALSE	NO CHANGE
TC1700001101.mm.2	Tmem200c	-0.168569	0.126153	0.0394832	FALSE	NO CHANGE
TC0500000844.mm.2	Cxcl3	0.212065	0.126251	0.0395195	FALSE	NO CHANGE
TC1100003067.mm.2	4933402P03Rik	-0.224185	0.126472	0.0395943	FALSE	NO CHANGE
TC0700000787.mm.2	Egfbp2; Klk1b26	-0.232681	0.126533	0.0396193	FALSE	NO CHANGE
TC0700000554.mm.2	Polr2i	-0.258569	0.126555	0.0396318	FALSE	NO CHANGE
TC0900002053.mm.2	Spa17	-0.266141	0.126561	0.0396395	FALSE	NO CHANGE
TC1600000539.mm.2	Gpr156	-0.233804	0.126615	0.039662	FALSE	NO CHANGE
TC1100003366.mm.2	Cct6b	-0.312264	0.126721	0.039701	FALSE	NO CHANGE
TC0200002499.mm.2	Ywhab	-0.159837	0.126755	0.0397207	FALSE	NO CHANGE
TC1500000604.mm.2	Ppp1r16a	-0.221268	0.126755	0.0397229	FALSE	NO CHANGE
TC1900000999.mm.2	Mrpl49	-0.234837	0.126763	0.0397311	FALSE	NO CHANGE
TC0700002820.mm.2	Scgb2b26	-0.319565	0.126781	0.0397424	FALSE	NO CHANGE
TC1100004234.mm.2	Ccdc57	-0.295018	0.126931	0.0397952	FALSE	NO CHANGE
TC0600001450.mm.2	Mrpl51	0.150779	0.127277	0.0399096	FALSE	NO CHANGE
TC0900001605.mm.2	Rpl14; Rpl14-ps1	-0.150616	0.127399	0.0399534	FALSE	NO CHANGE
TC0700000921.mm.2	Luzp2	-0.247192	0.127433	0.0399756	FALSE	NO CHANGE
TC0100001863.mm.2	Kcnh1	-0.163062	0.127443	0.0399844	FALSE	NO CHANGE
TC0900002233.mm.2	Nxpe2	0.320272	0.127465	0.0399993	FALSE	NO CHANGE
TC0700002255.mm.2	Vmn2r43	-0.30058	0.127465	0.0400028	FALSE	NO CHANGE
TC0500003415.mm.2	Orai2	0.216141	0.127554	0.0400364	FALSE	NO CHANGE
TC0600002200.mm.2	Ezh2	-0.229764	0.127578	0.0400498	FALSE	NO CHANGE
TC1000002396.mm.2	Slc5a4b	-0.286377	0.127878	0.0401499	FALSE	NO CHANGE
TC0700002424.mm.2	Ccdc9	-0.255036	0.12792	0.0401687	FALSE	NO CHANGE
TC1200000750.mm.2	Srsf5	0.303967	0.127933	0.0401786	FALSE	NO CHANGE
TC0200001455.mm.2	Alx4	-0.144855	0.128022	0.0402122	FALSE	NO CHANGE
TC1100001470.mm.2	B130006D01Rik	-0.268478	0.128067	0.0402322	FALSE	NO CHANGE
TC0800002421.mm.2	Haus8	0.354728	0.128202	0.0402812	FALSE	NO CHANGE
TC0300000812.mm.2	Pglyrp4	-0.252409	0.128202	0.040286	FALSE	NO CHANGE
TC1900001187.mm.2	Olfr1497	-0.218424	0.128337	0.0403343	FALSE	NO CHANGE
TC0100002382.mm.2	Ppil3	-0.159221	0.128366	0.0403494	FALSE	NO CHANGE
TC1300001877.mm.2	Tbc1d7	0.307409	0.128388	0.0403619	FALSE	NO CHANGE
TC1000000688.mm.2	Ipmk	-0.182663	0.128508	0.0404053	FALSE	NO CHANGE
TC1600001071.mm.2	Ets2	0.299203	0.128616	0.040448	FALSE	NO CHANGE
TC0900002452.mm.2	Paqr5	-0.179203	0.128616	0.0404509	FALSE	NO CHANGE
TC1400000877.mm.2	Rnaseh2b	-0.396087	0.128631	0.0404616	FALSE	NO CHANGE
TC0700000408.mm.2	9130221H12Rik	-0.216377	0.128654	0.0404745	FALSE	NO CHANGE
TC0300000202.mm.2	Samd7	-0.312065	0.128689	0.0404912	FALSE	NO CHANGE
TC0400001195.mm.2	Skint4	-0.352355	0.128714	0.0405091	FALSE	NO CHANGE
TC0400001064.mm.2	Mier1	-0.227337	0.128714	0.0405109	FALSE	NO CHANGE
TC0100002631.mm.2	Farsb	0.207264	0.128766	0.040537	FALSE	NO CHANGE
TC1900001227.mm.2	Ostf1	0.202319	0.128766	0.0405386	FALSE	NO CHANGE
TC1800000916.mm.2	Tmx3	0.202101	0.128916	0.0405917	FALSE	NO CHANGE
TC1100001610.mm.2	Gm11565	-0.263225	0.128998	0.0406237	FALSE	NO CHANGE
TC1900000906.mm.2	Carns1	-0.227681	0.128998	0.0406291	FALSE	NO CHANGE
TC0X00002734.mm.2	Rgag4	-0.17413	0.128998	0.040635	FALSE	NO CHANGE
TC1600002183.mm.2	Atp5o	0.22471	0.129032	0.0406515	FALSE	NO CHANGE
TC1300001371.mm.2	Fam208b	0.236486	0.12917	0.040701	FALSE	NO CHANGE
TC0100002554.mm.2	Pecr	-0.218207	0.129172	0.0407072	FALSE	NO CHANGE
TC0700002036.mm.2	Gm17387	-0.426667	0.129188	0.040721	FALSE	NO CHANGE
TC0400001933.mm.2	Exosc10	0.23683	0.129188	0.040724	FALSE	NO CHANGE
TC0800002052.mm.2	Eri1	-0.200453	0.129225	0.0407413	FALSE	NO CHANGE
TC0800002806.mm.2	Cdh16	-0.264764	0.129371	0.0407931	FALSE	NO CHANGE
TC0200004493.mm.2	Frmd5	-0.298116	0.129382	0.0408026	FALSE	NO CHANGE
TC0400001273.mm.2	Hectd3	0.275127	0.12939	0.040811	FALSE	NO CHANGE
TC0200004003.mm.2	Olfr1160	-0.314312	0.129482	0.0408458	FALSE	NO CHANGE
TC0200004502.mm.2	Spg11	0.181975	0.129673	0.0409117	FALSE	NO CHANGE
TC0700000365.mm.2	Vmn1r183	-0.305525	0.12972	0.0409326	FALSE	NO CHANGE
TC0200005081.mm.2	Gm20267	-0.208569	0.129761	0.0409514	FALSE	NO CHANGE
TC0600001405.mm.2	Vmn2r19	-0.327808	0.129772	0.0409605	FALSE	NO CHANGE
TC1400002653.mm.2	Rbm26; Gm17066	-0.295978	0.129963	0.0410268	FALSE	NO CHANGE
TC0900002308.mm.2	Cul5	-0.171504	0.129984	0.0410392	FALSE	NO CHANGE
TC0700001604.mm.2	Olfr512	-0.326377	0.130127	0.041102	FALSE	NO CHANGE
TC0700000820.mm.2	Pnkp	-0.217101	0.130127	0.0411024	FALSE	NO CHANGE
TC0700004500.mm.2	Olfr531	-0.291087	0.130127	0.0411039	FALSE	NO CHANGE
TC0300001022.mm.2	Nhlh2	-0.294583	0.130127	0.0411078	FALSE	NO CHANGE
TC0800001632.mm.2	Ctxn1	-0.187899	0.130127	0.0411138	FALSE	NO CHANGE
TC0500003186.mm.2	Trafd1	0.205725	0.130162	0.0411307	FALSE	NO CHANGE
TC0100000260.mm.2	Unc50	-0.182536	0.130254	0.0411657	FALSE	NO CHANGE
TC1200002076.mm.2	Fam161b	-0.206033	0.130599	0.0412805	FALSE	NO CHANGE
TC1100002486.mm.2	Npm1	0.203007	0.130622	0.0413009	FALSE	NO CHANGE
TC1100002066.mm.2	Tbcd	-0.177101	0.130622	0.0413031	FALSE	NO CHANGE
TC0X00003175.mm.2	Tsr2	-0.211775	0.130622	0.0413054	FALSE	NO CHANGE
TC1300000731.mm.2	Gm5084	-0.280598	0.130664	0.0413247	FALSE	NO CHANGE
TC1100003421.mm.2	Znhit3	-0.311377	0.1309	0.0414051	FALSE	NO CHANGE
TC0X00000347.mm.2	Rhox2d	-0.163678	0.131265	0.0415265	FALSE	NO CHANGE
TC0800001863.mm.2	Ckap2	0.38721	0.13138	0.0415687	FALSE	NO CHANGE
TC0200002544.mm.2	Cd40	0.289547	0.131611	0.0416534	FALSE	NO CHANGE
TC0900002586.mm.2	Gcnt3	0.19183	0.131611	0.0416537	FALSE	NO CHANGE
TC0600001129.mm.2	Arl6ip5	0.205181	0.131642	0.0416695	FALSE	NO CHANGE
TC0700000764.mm.2	Zfp658	-0.154746	0.131654	0.0416792	FALSE	NO CHANGE
TC0X00000574.mm.2	4933402E13Rik	0.265435	0.131742	0.0417128	FALSE	NO CHANGE
TC0900001606.mm.2	5830454E08Rik	-0.187663	0.131764	0.0417259	FALSE	NO CHANGE
TC1800000123.mm.2	Psma8	0.240924	0.131767	0.0417328	FALSE	NO CHANGE
TC1100003935.mm.2	Ddx5; Mir3064	0.228514	0.131774	0.0417458	FALSE	NO CHANGE
TC0100002479.mm.2	Crygb	-0.223478	0.131774	0.0417469	FALSE	NO CHANGE
TC0200004481.mm.2	Zscan29	0.239149	0.13181	0.0417642	FALSE	NO CHANGE
TC0100003645.mm.2	Hnrnpu	0.179583	0.131921	0.0418053	FALSE	NO CHANGE
TC0700004510.mm.2	Cox8b	-0.297717	0.132091	0.0418652	FALSE	NO CHANGE
TC0400004123.mm.2	Actrt2	-0.304601	0.132122	0.0418808	FALSE	NO CHANGE
TC0400002762.mm.2	Inip	-0.261739	0.132366	0.0419643	FALSE	NO CHANGE
TC0200005490.mm.2	Gm14305	0.287627	0.132561	0.0420321	FALSE	NO CHANGE
TC0500000019.mm.2	Krit1	0.209348	0.132569	0.0420415	FALSE	NO CHANGE
TC0900000519.mm.2	Treh	0.267138	0.132569	0.0420465	FALSE	NO CHANGE
TC0100002445.mm.2	Ndufs1	-0.181522	0.132637	0.042074	FALSE	NO CHANGE
TC0500002410.mm.2	Ccdc149	0.36442	0.132872	0.0421587	FALSE	NO CHANGE
TC0700002731.mm.2	Zfp940	-0.248714	0.132872	0.0421605	FALSE	NO CHANGE
TC1500001983.mm.2	Pnpla5	0.214764	0.132924	0.0421829	FALSE	NO CHANGE
TC1100003667.mm.2	Fbxl20	-0.385996	0.133181	0.0422712	FALSE	NO CHANGE
TC0600002898.mm.2	5031434C07Rik	-0.172138	0.133181	0.0422765	FALSE	NO CHANGE
TC0100000300.mm.2	Il18rap	-0.265543	0.133267	0.0423097	FALSE	NO CHANGE
TC0500003429.mm.2	Znhit1	0.252192	0.133323	0.0423335	FALSE	NO CHANGE
TC0300000413.mm.2	Smad9	0.396504	0.133367	0.0423537	FALSE	NO CHANGE
TC0900002239.mm.2	Nnmt	0.709946	0.133372	0.0423641	FALSE	NO CHANGE
TC0400003149.mm.2	Gm10576	0.489438	0.133372	0.0423671	FALSE	NO CHANGE
TC0100001181.mm.2	Elk4	0.22029	0.133525	0.042422	FALSE	NO CHANGE
TC0700002990.mm.2	Rps11	0.178949	0.133525	0.042432	FALSE	NO CHANGE
TC0300002373.mm.2	Chtop	-0.22942	0.133525	0.0424339	FALSE	NO CHANGE
TC0800000192.mm.2	Gm6483	0.183025	0.133544	0.0424506	FALSE	NO CHANGE
TC0700004311.mm.2	Zg16	-0.490507	0.133544	0.0424518	FALSE	NO CHANGE
TC1200001704.mm.2	Prkd1	-0.217953	0.133599	0.0424753	FALSE	NO CHANGE
TC0500000423.mm.2	Evc2	0.258225	0.133681	0.0425075	FALSE	NO CHANGE
TC0700000566.mm.2	Hspb6	-0.307174	0.133787	0.0425474	FALSE	NO CHANGE
TC0700002180.mm.2	Zfp579	0.281486	0.134232	0.042695	FALSE	NO CHANGE
TC1100003869.mm.2	Spata32	-0.209692	0.134249	0.0427076	FALSE	NO CHANGE
TC1500002349.mm.2	Tonsl	-0.270797	0.134249	0.0427123	FALSE	NO CHANGE
TC1300001638.mm.2	Hist1h2ac	0.275054	0.134256	0.0427206	FALSE	NO CHANGE
TC1400000173.mm.2	Chchd1	-0.216975	0.134299	0.0427405	FALSE	NO CHANGE
TC0600002604.mm.2	Gm5878	0.268207	0.134463	0.0427987	FALSE	NO CHANGE
TC0700002968.mm.2	Pold1	0.232989	0.134477	0.042809	FALSE	NO CHANGE
TC0200004238.mm.2	D430041D05Rik	-0.241123	0.134544	0.0428363	FALSE	NO CHANGE
TC0600001146.mm.2	Gpr27	-0.275435	0.134554	0.0428457	FALSE	NO CHANGE
TC0300003232.mm.2	Glt28d2; Arfip1	-0.212138	0.134578	0.0428593	FALSE	NO CHANGE
TC0400000777.mm.2	Kdm4c	0.163841	0.134595	0.0428708	FALSE	NO CHANGE
TC0500001844.mm.2	Alox5ap	0.192699	0.134774	0.042934	FALSE	NO CHANGE
TC0700000435.mm.2	Cyp2b9	-0.771087	0.134811	0.0429519	FALSE	NO CHANGE
TC1300000599.mm.2	Cks2	-0.268134	0.134845	0.0429686	FALSE	NO CHANGE
TC0800000548.mm.2	Gm10083	-0.221522	0.134888	0.0429886	FALSE	NO CHANGE
TC0800002870.mm.2	Tmed6	-0.274728	0.134906	0.0430002	FALSE	NO CHANGE
TC0800000795.mm.2	Mvb12a	-0.159094	0.134946	0.0430191	FALSE	NO CHANGE
TC1800000851.mm.2	Txnl4a	-0.285489	0.134979	0.0430358	FALSE	NO CHANGE
[truncated: 20,010 more rows]

## Sheet: Sheet 2
ID	Gene.Symbol	Fold Change	p value (FDR)	p value	Significance	Status
TC1300001377.mm.2	Akr1c18	11.6336	9.03892e-43	2.03524e-46	TRUE	UP
TC0500003596.mm.2	Cyp3a16	11.0167	3.89648e-28	4.21127e-31	TRUE	UP
TC1900001057.mm.2	Slc22a27	8.15721	1.49722e-27	1.88788e-30	TRUE	UP
TC1900000317.mm.2	Rfk	1.97743	9.01193e-27	1.17692e-29	TRUE	UP
TC0900001128.mm.2	Nt5e	4.64089	1.57278e-26	2.19563e-29	TRUE	UP
TC1900000467.mm.2	Papss2	3.10862	5.32997e-26	8.1608e-29	TRUE	UP
TC0900001726.mm.2	Cep126	7.23076	8.23002e-26	1.29718e-28	TRUE	UP
TC1800001175.mm.2	Slc23a1	2.52678	1.00374e-25	1.62725e-28	TRUE	UP
TC0500002694.mm.2	Ugt2b37	5.03973	3.95848e-25	6.95221e-28	TRUE	UP
TC1000002383.mm.2	Gstt1	2.8387	2.11402e-23	4.85521e-26	TRUE	UP
TC1900001612.mm.2	Cyp17a1	10.4449	1.1291e-22	2.89825e-25	TRUE	UP
TC1000001701.mm.2	Ginm1	2.00654	5.46927e-22	1.47778e-24	TRUE	UP
TC1700002175.mm.2	Slc22a7	6.80487	5.8346e-22	1.60277e-24	TRUE	UP
TC0400003219.mm.2	Dio1	3.8673	6.74083e-22	1.88207e-24	TRUE	UP
TC0900001900.mm.2	Acp5	1.7375	7.33018e-22	2.07962e-24	TRUE	UP
TC0700000446.mm.2	Cyp2a12	1.47495	8.54355e-22	2.46234e-24	TRUE	UP
TC0800001202.mm.2	Ces4a	6.69201	3.67159e-21	1.22353e-23	TRUE	UP
TC0900000659.mm.2	Idh3a	2.52547	3.79008e-21	1.28009e-23	TRUE	UP
TC0300001446.mm.2	Gbp3	4.91295	3.87725e-21	1.36191e-23	TRUE	UP
TC1700000836.mm.2	Cyp39a1	3.04024	4.31037e-21	1.55287e-23	TRUE	UP
TC0800003091.mm.2	Sult5a1	4.01649	5.71473e-21	2.08454e-23	TRUE	UP
TC0900000560.mm.2	Apoa4	3.84487	6.71042e-21	2.47795e-23	TRUE	UP
TC0500000547.mm.2	Stim2	2.93205	1.30658e-20	4.94249e-23	TRUE	UP
TC1600001639.mm.2	Gramd1c	1.90868	1.40048e-20	5.36074e-23	TRUE	UP
TC0600000362.mm.2	Trim24	3.82788	1.58132e-20	6.12417e-23	TRUE	UP
TC0500003532.mm.2	Mmd2	6.1717	2.94157e-20	1.15246e-22	TRUE	UP
TC1700000335.mm.2	Abca3	2.5837	3.16861e-20	1.29849e-22	TRUE	UP
TC1000003226.mm.2	Gstt3	4.11172	6.51264e-20	2.84485e-22	TRUE	UP
TC1500001736.mm.2	9030619P08Rik	8.11085	7.53019e-20	3.32324e-22	TRUE	UP
TC0500001894.mm.2	Cyp51	2.58813	8.3692e-20	3.7312e-22	TRUE	UP
TC0200005184.mm.2	Ptgis	1.88667	1.26477e-19	5.69561e-22	TRUE	UP
TC0100000847.mm.2	Spp2	2.16293	1.4434e-19	6.56505e-22	TRUE	UP
TC0900001232.mm.2	Rbp1	2.99348	1.94008e-19	9.17358e-22	TRUE	UP
TC0400000961.mm.2	Fggy	1.10348	2.07982e-19	9.928e-22	TRUE	UP
TC1700000470.mm.2	Anks1	2.58245	3.19935e-19	1.58185e-21	TRUE	UP
TC1100003399.mm.2	Ccl6	2.92654	3.19935e-19	1.58484e-21	TRUE	UP
TC0200000868.mm.2	Gpd2	2.37786	8.60045e-19	4.41526e-21	TRUE	UP
TC0400002216.mm.2	Pdp1	2.99033	1.38958e-18	7.5092e-21	TRUE	UP
TC0900002780.mm.2	Me1	2.60524	1.84353e-18	1.0118e-20	TRUE	UP
TC0600003329.mm.2	Plbd1	1.66053	2.4352e-18	1.34887e-20	TRUE	UP
TC1900000090.mm.2	Slc25a45	2.54475	3.29772e-18	1.87117e-20	TRUE	UP
TC1900000987.mm.2	Frmd8	2.27717	3.30715e-18	1.90492e-20	TRUE	UP
TC1500001728.mm.2	Ly6a	4.41154	3.30715e-18	1.90631e-20	TRUE	UP
TC0600001371.mm.2	Slc6a12	2.16005	4.29137e-18	2.51229e-20	TRUE	UP
TC1900001767.mm.2	Slc22a29	3.24303	5.55842e-18	3.30412e-20	TRUE	UP
TC1700002791.mm.2	H2-Q1	2.16469	6.16868e-18	3.69465e-20	TRUE	UP
TC0X00000668.mm.2	Nsdhl	2.46442	6.337e-18	3.824e-20	TRUE	UP
TC0400001229.mm.2	Cyp4a31	4.21174	7.33816e-18	4.49423e-20	TRUE	UP
TC1500001450.mm.2	Angpt1	2.85808	7.36846e-18	4.54597e-20	TRUE	UP
TC0100003505.mm.2	Hsd17b7	2.41163	1.13263e-17	7.0388e-20	TRUE	UP
TC0300001641.mm.2	Fabp12	3.09967	1.42554e-17	8.98745e-20	TRUE	UP
TC1100004270.mm.2	Tlcd2	2.72312	1.44173e-17	9.15448e-20	TRUE	UP
TC0200005123.mm.2	Wfdc16	3.15478	1.63401e-17	1.05225e-19	TRUE	UP
TC1300002083.mm.2	Lect2	1.31812	1.68876e-17	1.09512e-19	TRUE	UP
TC1100001149.mm.2	Rab34	2.09154	1.82305e-17	1.21504e-19	TRUE	UP
TC0800002665.mm.2	Sall1	2.04895	2.60114e-17	1.79219e-19	TRUE	UP
TC1700002573.mm.2	Atl2	1.4535	3.12031e-17	2.16865e-19	TRUE	UP
TC1200002506.mm.2	Dnah11	5.42899	3.47856e-17	2.44373e-19	TRUE	UP
TC0400000377.mm.2	Dnaic1	3.92986	3.51119e-17	2.48247e-19	TRUE	UP
TC1000000030.mm.2	Esr1	2.41094	4.73783e-17	3.4564e-19	TRUE	UP
TC1900000455.mm.2	Mbl2	1.34737	4.74049e-17	3.47969e-19	TRUE	UP
TC0700001258.mm.2	Ctsc	2.30188	5.79886e-17	4.28269e-19	TRUE	UP
TC1000002814.mm.2	Acss3	2.27848	6.47682e-17	4.81255e-19	TRUE	UP
TC1900001123.mm.2	AW112010	1.83998	9.01352e-17	6.90038e-19	TRUE	UP
TC0200003630.mm.2	Ifih1	2.23551	9.38562e-17	7.2531e-19	TRUE	UP
TC1700001194.mm.2	Qpct	2.02451	9.38562e-17	7.26977e-19	TRUE	UP
TC0700001409.mm.2	Ucp2	3.33775	1.27761e-16	1.01836e-18	TRUE	UP
TC0500002219.mm.2	Letm1	1.27371	1.55359e-16	1.25933e-18	TRUE	UP
TC0800001396.mm.2	Bco1	1.88167	2.20726e-16	1.819e-18	TRUE	UP
TC0X00001024.mm.2	Chic1	3.15645	2.73595e-16	2.29613e-18	TRUE	UP
TC0900001195.mm.2	Paqr9	1.60645	3.01378e-16	2.55152e-18	TRUE	UP
TC0X00000122.mm.2	Sytl5	3.26884	3.06143e-16	2.61943e-18	TRUE	UP
TC1400001487.mm.2	Rarb	2.7058	4.36866e-16	3.81663e-18	TRUE	UP
TC0700002655.mm.2	Cyp2a22	4.66114	4.82461e-16	4.25841e-18	TRUE	UP
TC0500003599.mm.2	Cyp3a44	4.07332	5.31522e-16	4.71539e-18	TRUE	UP
TC1300000045.mm.2	Idi1	2.89795	6.1067e-16	5.44504e-18	TRUE	UP
TC1600000489.mm.2	Hacd2	1.19469	6.91371e-16	6.19575e-18	TRUE	UP
TC0100002576.mm.2	Tns1	1.3763	7.0581e-16	6.38871e-18	TRUE	UP
TC1400002054.mm.2	Slc7a7	1.59507	7.07854e-16	6.43909e-18	TRUE	UP
TC1400001906.mm.2	Ddhd1; Mir5131	2.6404	1.2865e-15	1.19346e-17	TRUE	UP
TC0100002772.mm.2	A730008H23Rik; Hjurp; 6430706D22Rik	2.20656	1.5224e-15	1.45343e-17	TRUE	UP
TC0500002699.mm.2	Sult1d1	2.29402	2.41809e-15	2.37388e-17	TRUE	UP
TC0700003845.mm.2	Folr2	2.82002	2.50868e-15	2.47411e-17	TRUE	UP
TC0900001200.mm.2	Pcolce2	2.20351	2.61077e-15	2.59831e-17	TRUE	UP
TC0800002313.mm.2	Msmo1	2.2244	3.00494e-15	3.00413e-17	TRUE	UP
TC0500003745.mm.2	Cyp3a41a	7.68433	4.09906e-15	4.15333e-17	TRUE	UP
TC0100003124.mm.2	Rnpep	1.29062	5.95901e-15	6.15694e-17	TRUE	UP
TC1300001353.mm.2	Hmgcs1	2.78571	6.05247e-15	6.29614e-17	TRUE	UP
TC0500002755.mm.2	Cxcl9	2.51759	6.7366e-15	7.06849e-17	TRUE	UP
TC0700002102.mm.2	Dhcr7	2.21553	6.79357e-15	7.15886e-17	TRUE	UP
TC0400002079.mm.2	Nadk	1.2956	6.88666e-15	7.28796e-17	TRUE	UP
TC0900002510.mm.2	Slc51b	2.70321	7.17551e-15	7.62595e-17	TRUE	UP
TC0400001107.mm.2	Dhcr24	1.38089	7.29849e-15	7.78952e-17	TRUE	UP
TC0500002651.mm.2	Igfbp7	1.23022	7.29853e-15	7.82244e-17	TRUE	UP
TC1500000045.mm.2	Lifr	1.55882	7.3524e-15	7.91328e-17	TRUE	UP
TC1500001606.mm.2	Fam84b	1.8731	8.97618e-15	9.70136e-17	TRUE	UP
TC1200002434.mm.2	Akt1	1.55389	1.12562e-14	1.25204e-16	TRUE	UP
TC0X00003360.mm.2	Tlr7	2.69618	1.33354e-14	1.50133e-16	TRUE	UP
TC1900000709.mm.2	As3mt	1.51525	1.51787e-14	1.72936e-16	TRUE	UP
TC1300000718.mm.2	Ntrk2	3.67449	1.54912e-14	1.77193e-16	TRUE	UP
TC0400003675.mm.2	Atpif1	1.34525	1.60129e-14	1.85324e-16	TRUE	UP
TC0400001555.mm.2	Sdc3	2.46618	1.6639e-14	1.9332e-16	TRUE	UP
TC0700004291.mm.2	Sult1a1	1.70611	1.68392e-14	1.96404e-16	TRUE	UP
TC0800001127.mm.2	Adgrg3	1.92226	1.70078e-14	1.99137e-16	TRUE	UP
TC0100000372.mm.2	Sdpr	2.01868	1.85117e-14	2.18413e-16	TRUE	UP
TC0400003794.mm.2	C1qa	1.91777	2.14519e-14	2.55035e-16	TRUE	UP
TC0200004651.mm.2	Rnf24	2.1977	2.19174e-14	2.61555e-16	TRUE	UP
TC0600002578.mm.2	Clec4f	2.71775	2.2179e-14	2.65676e-16	TRUE	UP
TC0700004530.mm.2	Irf7	3.1638	2.51481e-14	3.06259e-16	TRUE	UP
TC0100002544.mm.2	Fn1	1.0162	2.51481e-14	3.06906e-16	TRUE	UP
TC1400002215.mm.2	Fdft1	2.16324	2.58503e-14	3.17802e-16	TRUE	UP
TC1400000292.mm.2	Lrtm1	3.25013	2.74402e-14	3.39821e-16	TRUE	UP
TC0X00001934.mm.2	Cfp	2.21851	2.85997e-14	3.55468e-16	TRUE	UP
TC0100001634.mm.2	Pydc3	2.18797	2.87795e-14	3.58999e-16	TRUE	UP
TC0100001365.mm.2	Colgalt2	2.6744	2.95262e-14	3.69642e-16	TRUE	UP
TC0200000013.mm.2	Fam107b	1.71284	3.37169e-14	4.26661e-16	TRUE	UP
TC0200005317.mm.2	Slmo2	1.7167	4.08029e-14	5.2368e-16	TRUE	UP
TC1100003300.mm.2	Tmem97	1.49647	4.8661e-14	6.33299e-16	TRUE	UP
TC1100002643.mm.2	Gm12185; Tgtp1	2.9644	6.9319e-14	9.17761e-16	TRUE	UP
TC0700003850.mm.2	Il18bp	1.79422	8.85511e-14	1.18036e-15	TRUE	UP
TC0100000766.mm.2	Sp100	1.55815	9.055e-14	1.21108e-15	TRUE	UP
TC1200001981.mm.2	Rdh11	2.31183	9.16437e-14	1.22984e-15	TRUE	UP
TC1900001482.mm.2	Cyp2c70	1.60911	9.86217e-14	1.33237e-15	TRUE	UP
TC0100000333.mm.2	Bivm	1.10821	1.02475e-13	1.38904e-15	TRUE	UP
TC1900000566.mm.2	Cyp2c39	2.64159	1.07037e-13	1.45569e-15	TRUE	UP
TC1600001770.mm.2	St3gal6	1.48168	1.24833e-13	1.70896e-15	TRUE	UP
TC0500003465.mm.2	Pilrb2	1.62139	1.49191e-13	2.06258e-15	TRUE	UP
TC1300000425.mm.2	Ly86	2.34801	1.6338e-13	2.28082e-15	TRUE	UP
TC1600002152.mm.2	Tmprss2	2.23938	1.65646e-13	2.31991e-15	TRUE	UP
TC1000002886.mm.2	Trhde	1.85319	1.72573e-13	2.4247e-15	TRUE	UP
TC0100002392.mm.2	Trak2	1.38168	1.80976e-13	2.55733e-15	TRUE	UP
TC1000000812.mm.2	Bsg	0.728804	1.80976e-13	2.55905e-15	TRUE	UP
TC0400002633.mm.2	Acnat2	2.41986	1.92293e-13	2.75373e-15	TRUE	UP
TC1700001949.mm.2	Apom	0.924475	1.96075e-13	2.81671e-15	TRUE	UP
TC0100000836.mm.2	Ugt1a2; Ugt1a6a; Ugt1a6b; Ugt1a10; Ugt1a7c; Ugt1a5; Ugt1a9; Ugt1a1	0.865145	2.1557e-13	3.10648e-15	TRUE	UP
TC0400001974.mm.2	Eno1; Eno1b	0.780163	2.16671e-13	3.13673e-15	TRUE	UP
TC0400002849.mm.2	Megf9	1.02723	2.16671e-13	3.14185e-15	TRUE	UP
TC1100002649.mm.2	Tgtp2	2.62257	2.22718e-13	3.23957e-15	TRUE	UP
TC1300001155.mm.2	Cd180	2.11493	2.32629e-13	3.40469e-15	TRUE	UP
TC0800002734.mm.2	Ciapin1	1.22569	2.62562e-13	3.8546e-15	TRUE	UP
TC0700002644.mm.2	Axl	1.97665	2.99446e-13	4.43654e-15	TRUE	UP
TC1400001002.mm.2	Nudt18	1.80812	3.13053e-13	4.68044e-15	TRUE	UP
TC0200003165.mm.2	Fcna	1.71395	3.38183e-13	5.11706e-15	TRUE	UP
TC0700003775.mm.2	Acer3	1.21862	3.81257e-13	5.78598e-15	TRUE	UP
TC0X00003399.mm.2	Sh3bgrl	1.08241	4.11926e-13	6.28852e-15	TRUE	UP
TC0200002295.mm.2	H13	0.906866	4.9082e-13	7.55923e-15	TRUE	UP
TC0100000706.mm.2	Col4a3	4.29681	5.40777e-13	8.4017e-15	TRUE	UP
TC0100003593.mm.2	AI607873	1.95563	5.81776e-13	9.11727e-15	TRUE	UP
TC0400003792.mm.2	C1qb	2.37654	6.28592e-13	9.96417e-15	TRUE	UP
TC0400000446.mm.2	Npr2	1.47705	6.36197e-13	1.01134e-14	TRUE	UP
TC1500002327.mm.2	Prlr	2.07321	6.75521e-13	1.07993e-14	TRUE	UP
TC1000003140.mm.2	Coq10a	1.40393	6.85471e-13	1.09893e-14	TRUE	UP
TC0500002320.mm.2	Prom1	3.81255	7.08348e-13	1.14517e-14	TRUE	UP
TC1700002778.mm.2	Tapbp	1.031	7.52747e-13	1.22034e-14	TRUE	UP
TC1500002075.mm.2	Abcd2	3.32949	7.6127e-13	1.23759e-14	TRUE	UP
TC0200000933.mm.2	Gca	1.95824	8.33256e-13	1.36962e-14	TRUE	UP
TC0500003463.mm.2	Pilra	1.69889	9.00733e-13	1.48865e-14	TRUE	UP
TC0500003729.mm.2	Gbp8	1.44984	9.68491e-13	1.60935e-14	TRUE	UP
TC1700001522.mm.2	Fpr1	2.33808	9.70099e-13	1.61639e-14	TRUE	UP
TC1400001930.mm.2	Gch1	1.83603	9.79955e-13	1.63723e-14	TRUE	UP
TC0900002321.mm.2	Cib2	1.56543	9.94574e-13	1.66613e-14	TRUE	UP
TC1900001066.mm.2	Slc3a2	1.08379	1.07432e-12	1.81908e-14	TRUE	UP
TC1100004291.mm.2	Psme2b	1.20125	1.08648e-12	1.84519e-14	TRUE	UP
TC0200002594.mm.2	Cebpb	1.51009	1.33316e-12	2.30538e-14	TRUE	UP
TC1800001437.mm.2	Adrb2	1.79937	1.80623e-12	3.19666e-14	TRUE	UP
TC1800000965.mm.2	Gm17430	1.39736	2.02635e-12	3.63184e-14	TRUE	UP
TC0700001178.mm.2	Tm6sf1	1.63491	2.17351e-12	3.92497e-14	TRUE	UP
TC1100001632.mm.2	Stat5a	1.31428	2.47334e-12	4.47754e-14	TRUE	UP
TC0400001530.mm.2	Ptp4a2	0.855072	2.54622e-12	4.62094e-14	TRUE	UP
TC1900001476.mm.2	Cyp2c38	2.12495	2.9134e-12	5.33979e-14	TRUE	UP
TC0100003891.mm.2	Ifi203	1.55696	3.03408e-12	5.60676e-14	TRUE	UP
TC1700000839.mm.2	Rcan2	1.94043	3.07384e-12	5.72967e-14	TRUE	UP
TC0500003744.mm.2	Cyp3a41b	3.9488	3.07384e-12	5.73035e-14	TRUE	UP
TC0400001514.mm.2	Fndc5	1.89536	3.13479e-12	5.8585e-14	TRUE	UP
TC0500002415.mm.2	Sepsecs	1.07645	3.4361e-12	6.44598e-14	TRUE	UP
TC1900001765.mm.2	Vps51; Tm7sf2	1.41103	3.4361e-12	6.45256e-14	TRUE	UP
TC1000000744.mm.2	Lss	2.53063	3.53826e-12	6.66033e-14	TRUE	UP
TC0300002334.mm.2	Fdps	1.88018	3.59439e-12	6.78714e-14	TRUE	UP
TC1600000564.mm.2	Igsf11	1.48656	3.59439e-12	6.79836e-14	TRUE	UP
TC0600001035.mm.2	Mgll	1.59022	3.64705e-12	6.91439e-14	TRUE	UP
TC1100002921.mm.2	Ulk2	1.04522	3.67714e-12	6.98799e-14	TRUE	UP
TC0900000051.mm.2	Mmp27	2.53208	3.71837e-12	7.10459e-14	TRUE	UP
TC1900001484.mm.2	Pdlim1	1.65817	3.71837e-12	7.11658e-14	TRUE	UP
TC0200000651.mm.2	Ptgs1	1.70995	3.8e-12	7.30703e-14	TRUE	UP
TC1700001827.mm.2	Sik1	2.45303	3.87166e-12	7.46227e-14	TRUE	UP
TC0600003536.mm.2	Clec1b	1.42944	4.3134e-12	8.39138e-14	TRUE	UP
TC1200000462.mm.2	Srp54c; Srp54b	1.04344	4.90731e-12	9.63517e-14	TRUE	UP
TC0X00003437.mm.2	Il2rg	2.02627	5.05417e-12	9.99182e-14	TRUE	UP
TC0300001447.mm.2	Gbp2	1.8267	5.09206e-12	1.01126e-13	TRUE	UP
TC1300000278.mm.2	BC005537	0.743315	5.72857e-12	1.14282e-13	TRUE	UP
TC0400003681.mm.2	Themis2	2.39676	5.81963e-12	1.16361e-13	TRUE	UP
TC1400000076.mm.2	Pxk	0.921359	6.21492e-12	1.25384e-13	TRUE	UP
TC0800000734.mm.2	Tm6sf2	1.55719	6.6026e-12	1.33503e-13	TRUE	UP
TC0500002745.mm.2	G3bp2	1.38486	6.724e-12	1.3626e-13	TRUE	UP
TC1200002272.mm.2	Serpina6	1.84156	6.90405e-12	1.4022e-13	TRUE	UP
TC0700004565.mm.2	Ctsd; Ifitm10	0.813714	7.01512e-12	1.42807e-13	TRUE	UP
TC0600003433.mm.2	Itpr2	0.943569	7.69414e-12	1.58692e-13	TRUE	UP
TC0200004647.mm.2	Siglec1	1.85754	8.12883e-12	1.6839e-13	TRUE	UP
TC0500000532.mm.2	Pi4k2b	1.44879	8.28229e-12	1.72074e-13	TRUE	UP
TC0100001632.mm.2	Pyhin1	2.23745	8.28229e-12	1.72315e-13	TRUE	UP
TC1100002897.mm.2	Shmt1	1.42138	8.9414e-12	1.87235e-13	TRUE	UP
TC1700002692.mm.2	Calm2	0.84933	9.16811e-12	1.92756e-13	TRUE	UP
TC1100003055.mm.2	Cd68	2.07556	9.16811e-12	1.92809e-13	TRUE	UP
TC0600002324.mm.2	Ggct	1.47489	9.17438e-12	1.93354e-13	TRUE	UP
TC0900002676.mm.2	Mapk6	1.41054	9.43642e-12	1.99301e-13	TRUE	UP
TC0200001368.mm.2	Spi1	2.21897	9.57632e-12	2.02687e-13	TRUE	UP
TC1500000549.mm.2	Ly6e	1.41129	9.68663e-12	2.05894e-13	TRUE	UP
TC0300000693.mm.2	Cd5l	2.67447	9.93084e-12	2.1198e-13	TRUE	UP
TC1700001952.mm.2	Aif1	1.62661	1.03604e-11	2.22548e-13	TRUE	UP
TC0300002695.mm.2	Cd53	1.9063	1.08846e-11	2.34789e-13	TRUE	UP
TC0600000388.mm.2	Tbxas1	1.70409	1.11579e-11	2.42694e-13	TRUE	UP
TC0100003591.mm.2	Pydc4	2.39418	1.11613e-11	2.4327e-13	TRUE	UP
TC0200004219.mm.2	Cd44	2.23514	1.13378e-11	2.47628e-13	TRUE	UP
TC0600003539.mm.2	D630045J12Rik	0.770109	1.31373e-11	2.88115e-13	TRUE	UP
TC1300000763.mm.2	Mir23b; Mir27b; Mir24-1; 2010111I01Rik	1.12755	1.35635e-11	2.98682e-13	TRUE	UP
TC1800000625.mm.2	Csf1r	1.77239	1.41305e-11	3.12441e-13	TRUE	UP
TC1000002929.mm.2	Lyz2	2.3587	1.43208e-11	3.17294e-13	TRUE	UP
TC0600002114.mm.2	Parp12	1.46833	1.51774e-11	3.37641e-13	TRUE	UP
TC1700000934.mm.2	Treml4	2.12125	1.54184e-11	3.43696e-13	TRUE	UP
TC0600001532.mm.2	Clec12a	2.04462	1.59883e-11	3.5928e-13	TRUE	UP
TC0300003133.mm.2	Ifi44	2.91933	1.84577e-11	4.16432e-13	TRUE	UP
TC1100001070.mm.2	Rilp	0.774493	1.85581e-11	4.19534e-13	TRUE	UP
TC0200003298.mm.2	Uck1	1.74174	2.0203e-11	4.5945e-13	TRUE	UP
TC1200002524.mm.2	Serpina3f	1.31647	2.25964e-11	5.16931e-13	TRUE	UP
TC0600000325.mm.2	Akr1b10	1.18504	2.29183e-11	5.25328e-13	TRUE	UP
TC1100002642.mm.2	Gm5431	1.37156	2.3059e-11	5.29591e-13	TRUE	UP
TC0500001239.mm.2	Oasl2	1.94793	2.34166e-11	5.38858e-13	TRUE	UP
TC1300002079.mm.2	Cxcl14	2.31105	2.40247e-11	5.58261e-13	TRUE	UP
TC0100003888.mm.2	Ifi204	1.90085	2.42449e-11	5.65562e-13	TRUE	UP
TC0100003889.mm.2	Mnda	1.95504	2.51002e-11	5.87773e-13	TRUE	UP
TC0400003793.mm.2	C1qc	2.08582	2.73136e-11	6.42065e-13	TRUE	UP
TC0400003724.mm.2	Cd52	1.40585	2.78983e-11	6.57065e-13	TRUE	UP
TC0300001445.mm.2	Gbp7	2.20495	2.88283e-11	6.80267e-13	TRUE	UP
TC1000001599.mm.2	Cs	1.06978	3.0545e-11	7.22153e-13	TRUE	UP
TC1200000996.mm.2	9030617O03Rik	1.15652	3.07861e-11	7.29239e-13	TRUE	UP
TC0600002121.mm.2	Slc37a3	1.63964	3.10796e-11	7.37592e-13	TRUE	UP
TC1500000432.mm.2	Sqle	2.54714	3.11679e-11	7.41091e-13	TRUE	UP
TC1800000249.mm.2	Lims2	1.47082	3.14588e-11	7.5084e-13	TRUE	UP
TC1200001296.mm.2	Zfp386	0.956123	3.26537e-11	7.83662e-13	TRUE	UP
TC1600001556.mm.2	Parp14	1.43415	3.26537e-11	7.83772e-13	TRUE	UP
TC0300002506.mm.2	Fcgr1	1.79469	3.34758e-11	8.05011e-13	TRUE	UP
TC0600000553.mm.2	Sspo	1.61368	3.47412e-11	8.38569e-13	TRUE	UP
TC0700000236.mm.2	Slc1a5	1.79815	3.51486e-11	8.5157e-13	TRUE	UP
TC1100001209.mm.2	Tmem98	1.18308	3.57302e-11	8.67269e-13	TRUE	UP
TC0800001176.mm.2	Cdh5	1.13223	3.60242e-11	8.76028e-13	TRUE	UP
TC1000001595.mm.2	Apof	0.901975	3.6564e-11	8.91127e-13	TRUE	UP
TC0100000632.mm.2	Slc11a1	1.71029	3.80005e-11	9.29927e-13	TRUE	UP
TC0X00002676.mm.2	Vsig4	1.86495	3.80005e-11	9.30931e-13	TRUE	UP
TC1600000224.mm.2	Klhl22	0.828877	3.83125e-11	9.40301e-13	TRUE	UP
TC1200000460.mm.2	Srp54b	0.976649	3.89953e-11	9.58814e-13	TRUE	UP
TC0100002337.mm.2	Stk17b	1.11755	4.08614e-11	1.01206e-12	TRUE	UP
TC0100001520.mm.2	Mpc2	1.42375	4.13858e-11	1.02691e-12	TRUE	UP
TC0100001522.mm.2	Adcy10	3.54996	4.33978e-11	1.0827e-12	TRUE	UP
TC0800001255.mm.2	Cdh1	1.50029	4.36654e-11	1.09134e-12	TRUE	UP
TC0800003059.mm.2	Slc7a5	1.4098	4.60809e-11	1.15794e-12	TRUE	UP
TC1600001042.mm.2	Cbr1	1.59866	4.61261e-11	1.16323e-12	TRUE	UP
TC1000000547.mm.2	Psap	0.631232	5.00604e-11	1.26921e-12	TRUE	UP
TC1100002233.mm.2	Cobl	1.19527	5.29748e-11	1.35025e-12	TRUE	UP
TC0100001806.mm.2	Esrrg	1.41246	5.61371e-11	1.43338e-12	TRUE	UP
TC0900002115.mm.2	Sc5d	0.76067	5.74998e-11	1.47336e-12	TRUE	UP
TC1600001966.mm.2	App	0.893442	5.88728e-11	1.51119e-12	TRUE	UP
TC1200002251.mm.2	Lgmn	1.3883	6.25552e-11	1.60853e-12	TRUE	UP
TC1100002648.mm.2	9930111J21Rik2	1.60768	6.73755e-11	1.73855e-12	TRUE	UP
TC0500003368.mm.2	Ncf1	1.52011	7.00099e-11	1.81598e-12	TRUE	UP
TC0700004610.mm.2	Ccnd1; Mir3962	2.55049	7.04088e-11	1.8295e-12	TRUE	UP
TC1100002829.mm.2	2210407C18Rik	3.73678	7.0849e-11	1.84413e-12	TRUE	UP
TC0100003890.mm.2	Mndal	1.47761	7.15795e-11	1.86637e-12	TRUE	UP
TC0500003181.mm.2	Oas1a	1.77183	7.2412e-11	1.89134e-12	TRUE	UP
TC1200001030.mm.2	Ifi27	1.45065	7.43276e-11	1.95141e-12	TRUE	UP
TC0600000182.mm.2	Cped1	1.10056	7.44318e-11	1.9575e-12	TRUE	UP
TC1100002967.mm.2	Cox10	0.761558	8.11326e-11	2.15564e-12	TRUE	UP
TC0200003720.mm.2	Slc25a12	1.21221	8.4301e-11	2.24742e-12	TRUE	UP
TC0900002320.mm.2	Dmxl2	0.867989	9.00509e-11	2.41638e-12	TRUE	UP
TC0900001768.mm.2	Endod1	0.932536	9.07722e-11	2.44038e-12	TRUE	UP
TC0400002474.mm.2	Enho	1.16082	9.61507e-11	2.60229e-12	TRUE	UP
TC0900003275.mm.2	Higd1a	1.07295	9.71376e-11	2.63775e-12	TRUE	UP
TC0300002053.mm.2	P2ry13	1.7594	1.02037e-10	2.7754e-12	TRUE	UP
TC0800000845.mm.2	Hmox1	1.54636	1.02089e-10	2.7814e-12	TRUE	UP
TC1400002162.mm.2	Phf11b	1.87301	1.03319e-10	2.81958e-12	TRUE	UP
TC0X00003358.mm.2	Tmsb4x	1.51243	1.10109e-10	3.01478e-12	TRUE	UP
TC0800001112.mm.2	Cpne2	1.04408	1.15063e-10	3.15561e-12	TRUE	UP
TC1300001812.mm.2	Nrn1	1.18393	1.18031e-10	3.24763e-12	TRUE	UP
TC0400002634.mm.2	Acnat1	2.19779	1.22239e-10	3.37441e-12	TRUE	UP
TC0400003208.mm.2	Acot11	1.69518	1.23719e-10	3.42644e-12	TRUE	UP
TC0500003399.mm.2	Ccl24	1.55293	1.24338e-10	3.44917e-12	TRUE	UP
TC1100000302.mm.2	Rtn4	1.18553	1.28148e-10	3.56063e-12	TRUE	UP
TC0300003077.mm.2	Sh3glb1	0.890924	1.29935e-10	3.61615e-12	TRUE	UP
TC1300000919.mm.2	Glrx	1.14207	1.30949e-10	3.65024e-12	TRUE	UP
TC0500000170.mm.2	Gsap	1.3158	1.31897e-10	3.68262e-12	TRUE	UP
TC0800002119.mm.2	Asah1	0.890779	1.32654e-10	3.71048e-12	TRUE	UP
TC1200000458.mm.2	Srp54a	0.933442	1.32654e-10	3.71569e-12	TRUE	UP
TC0800000096.mm.2	Arhgef7	0.890634	1.34863e-10	3.78972e-12	TRUE	UP
TC0500001775.mm.2	Cyp3a59	1.82917	1.51671e-10	4.2757e-12	TRUE	UP
TC0100003533.mm.2	Fcer1g	1.86694	1.56699e-10	4.42448e-12	TRUE	UP
TC0500001225.mm.2	Mvk	1.72047	1.61534e-10	4.5683e-12	TRUE	UP
TC0200000352.mm.2	Apbb1ip	1.5654	1.63402e-10	4.62846e-12	TRUE	UP
TC0X00001829.mm.2	Cybb	2.14071	1.67091e-10	4.74802e-12	TRUE	UP
TC1400002091.mm.2	Psme2	0.711793	1.67151e-10	4.75726e-12	TRUE	UP
TC0600000359.mm.2	Akr1d1	1.50203	1.6805e-10	4.79039e-12	TRUE	UP
TC0800000659.mm.2	Ddx60	1.92895	1.74578e-10	4.9922e-12	TRUE	UP
TC1900001203.mm.2	Psat1	2.38446	1.74859e-10	5.016e-12	TRUE	UP
TC0800002553.mm.2	Tecr	0.634203	1.80067e-10	5.1735e-12	TRUE	UP
TC1200002101.mm.2	0610007P14Rik	1.16788	2.11952e-10	6.12776e-12	TRUE	UP
TC0500000468.mm.2	Cd38	1.31382	2.16808e-10	6.27793e-12	TRUE	UP
TC0300000903.mm.2	Ctss	1.80409	2.30888e-10	6.71682e-12	TRUE	UP
TC0400001557.mm.2	Laptm5	1.79288	2.34079e-10	6.82019e-12	TRUE	UP
TC0500003180.mm.2	Oas1g	1.39933	2.38294e-10	6.95372e-12	TRUE	UP
TC0600001369.mm.2	Usp18	2.25996	2.39046e-10	6.98644e-12	TRUE	UP
TC0100003319.mm.2	Soat1	1.72486	2.42121e-10	7.08722e-12	TRUE	UP
TC0600003503.mm.2	Herc6	1.57572	2.5419e-10	7.45194e-12	TRUE	UP
TC0500003730.mm.2	Gbp9	1.44065	2.54575e-10	7.47468e-12	TRUE	UP
TC0100000927.mm.2	Sned1; Mir6901	0.986069	2.74612e-10	8.08773e-12	TRUE	UP
TC1100004292.mm.2	9930111J21Rik1; 9930111J21Rik2	1.49344	2.78084e-10	8.20253e-12	TRUE	UP
TC1000000759.mm.2	Itgb2	1.91565	2.85693e-10	8.45268e-12	TRUE	UP
TC0500003464.mm.2	Pilrb1	1.37857	2.93332e-10	8.69192e-12	TRUE	UP
TC0100001611.mm.2	Kcnj10	1.2971	3.3035e-10	9.84831e-12	TRUE	UP
TC0800001186.mm.2	Pdp2	1.23768	3.30889e-10	9.87929e-12	TRUE	UP
TC1500001935.mm.2	Desi1	0.948188	3.3375e-10	9.97975e-12	TRUE	UP
TC1200001272.mm.2	Pld4	1.94263	3.46456e-10	1.03753e-11	TRUE	UP
TC0500003202.mm.2	Cux2	3.41707	3.5046e-10	1.0511e-11	TRUE	UP
TC1100001634.mm.2	Atp6v0a1	0.791504	3.54959e-10	1.06619e-11	TRUE	UP
TC0600003236.mm.2	Clec7a	2.11388	3.68947e-10	1.10987e-11	TRUE	UP
TC1100001238.mm.2	Slfn2	1.47928	3.70509e-10	1.11623e-11	TRUE	UP
TC0700000168.mm.2	Sult2a5	2.30161	3.75754e-10	1.13638e-11	TRUE	UP
TC1700002780.mm.2	H2-DMb1	1.39721	3.75934e-10	1.13935e-11	TRUE	UP
TC0300002343.mm.2	Slc50a1	0.872645	3.80703e-10	1.15723e-11	TRUE	UP
TC0900000296.mm.2	Ets1	0.927156	3.83373e-10	1.16707e-11	TRUE	UP
TC1100003382.mm.2	Slfn8	1.76172	3.99179e-10	1.22058e-11	TRUE	UP
TC0800002558.mm.2	Adgre5; Mir1668	1.30038	4.14832e-10	1.27218e-11	TRUE	UP
TC0200005181.mm.2	Znfx1	1.32013	4.15376e-10	1.27572e-11	TRUE	UP
TC0700004207.mm.2	Igsf6	1.72998	4.2827e-10	1.31725e-11	TRUE	UP
TC0500000997.mm.2	Arhgap24	1.19938	4.39195e-10	1.35283e-11	TRUE	UP
TC1900000225.mm.2	Ms4a6b	1.73761	4.39407e-10	1.35546e-11	TRUE	UP
TC0500002919.mm.2	Tgfbr3	1.25158	4.67407e-10	1.44394e-11	TRUE	UP
TC0700001710.mm.2	Acsm2	1.81946	4.73142e-10	1.46379e-11	TRUE	UP
TC1500000742.mm.2	Srebf2	1.12553	4.94899e-10	1.53556e-11	TRUE	UP
TC1700002789.mm.2	H2-Q7; H2-Q9	0.894275	5.01879e-10	1.55947e-11	TRUE	UP
TC0200005472.mm.2	Eng	1.05853	5.27501e-10	1.64384e-11	TRUE	UP
TC0700003028.mm.2	Emp3	1.60076	5.29852e-10	1.65355e-11	TRUE	UP
TC0300001137.mm.2	Sort1	1.75967	5.54744e-10	1.73373e-11	TRUE	UP
TC1700002820.mm.2	C920025E04Rik	0.749257	5.94289e-10	1.86267e-11	TRUE	UP
TC0300001639.mm.2	Fabp4	1.33116	5.97128e-10	1.87426e-11	TRUE	UP
TC0100000237.mm.2	Hs6st1	1.1719	6.0274e-10	1.8973e-11	TRUE	UP
TC0100000682.mm.2	Utp14b; Acsl3	2.23031	6.1773e-10	1.94727e-11	TRUE	UP
TC0700004515.mm.2	Ifitm3	1.01949	6.2097e-10	1.96028e-11	TRUE	UP
TC1100001236.mm.2	Slfn5	1.37243	6.22893e-10	1.96916e-11	TRUE	UP
TC1700000085.mm.2	Mpc1	0.847844	6.52022e-10	2.06418e-11	TRUE	UP
TC1200002525.mm.2	Serpina3g	1.0527	6.61149e-10	2.09613e-11	TRUE	UP
TC0200001380.mm.2	Arhgap1	0.804257	6.76718e-10	2.1515e-11	TRUE	UP
TC1500000008.mm.2	Oxct1	1.13699	7.01552e-10	2.23678e-11	TRUE	UP
TC0500002078.mm.2	Fastk	0.766685	7.20519e-10	2.30049e-11	TRUE	UP
TC1700002655.mm.2	Abcg5	2.63486	7.38427e-10	2.361e-11	TRUE	UP
TC1100001072.mm.2	Slc43a2	1.16812	7.46475e-10	2.39009e-11	TRUE	UP
TC1700000936.mm.2	B430306N03Rik	1.90438	7.68263e-10	2.46331e-11	TRUE	UP
TC1000002549.mm.2	Tle6	1.16063	7.79345e-10	2.50937e-11	TRUE	UP
TC0500003504.mm.2	Mad1l1	1.42457	8.64326e-10	2.79857e-11	TRUE	UP
TC1000000170.mm.2	Gm5420	1.08679	8.76432e-10	2.84566e-11	TRUE	UP
TC0100000743.mm.2	Gm7609	1.20424	8.96339e-10	2.91433e-11	TRUE	UP
TC1500000782.mm.2	Pnpla3	5.24438	9.3774e-10	3.05739e-11	TRUE	UP
TC1400001086.mm.2	Epsti1	1.32627	9.50031e-10	3.10602e-11	TRUE	UP
TC1800000498.mm.2	Eno1b	0.585272	9.7666e-10	3.20627e-11	TRUE	UP
TC1000000100.mm.2	Hivep2	1.02837	9.94436e-10	3.26911e-11	TRUE	UP
TC0800003069.mm.2	Mvd	2.99667	9.96978e-10	3.28196e-11	TRUE	UP
TC0200000274.mm.2	Plxdc2	1.26264	1.09795e-09	3.63411e-11	TRUE	UP
TC0600000609.mm.2	Snx10	1.51471	1.14091e-09	3.78658e-11	TRUE	UP
TC1700002414.mm.2	Rab31	1.15732	1.15323e-09	3.83786e-11	TRUE	UP
TC1100000484.mm.2	Timd4	1.36199	1.17602e-09	3.92108e-11	TRUE	UP
TC0200001681.mm.2	Fmn1	1.13632	1.17602e-09	3.9243e-11	TRUE	UP
TC1900000019.mm.2	Unc93b1	0.96837	1.17874e-09	3.94399e-11	TRUE	UP
TC1500001838.mm.2	Rac2	1.53725	1.18936e-09	3.9849e-11	TRUE	UP
TC0700001910.mm.2	Plekha1	0.890308	1.19359e-09	4.00444e-11	TRUE	UP
TC1100003141.mm.2	Slc13a5	2.31643	1.19838e-09	4.03415e-11	TRUE	UP
TC1400000459.mm.2	Ear12; Ear2; Ear3	1.59027	1.19838e-09	4.0367e-11	TRUE	UP
TC0600001418.mm.2	Cd163	1.6325	1.2929e-09	4.37255e-11	TRUE	UP
TC0600001787.mm.2	Samd9l	1.81043	1.30108e-09	4.40609e-11	TRUE	UP
TC0700002503.mm.2	Bcl3	1.994	1.40894e-09	4.80939e-11	TRUE	UP
TC0200005013.mm.2	Samhd1	1.50183	1.43605e-09	4.91487e-11	TRUE	UP
TC0700003938.mm.2	Trim12a	1.44647	1.58047e-09	5.41627e-11	TRUE	UP
TC1100000362.mm.2	Lcp2	1.5138	1.59061e-09	5.45818e-11	TRUE	UP
TC0700003943.mm.2	Trim30a	1.84489	1.60081e-09	5.50041e-11	TRUE	UP
TC1700002822.mm.2	H2-T22; H2-T9	0.919257	1.75824e-09	6.08884e-11	TRUE	UP
TC0900001563.mm.2	Itga9	0.905851	1.99715e-09	6.93419e-11	TRUE	UP
TC1200000033.mm.2	Gm6682	1.18967	2.17484e-09	7.5609e-11	TRUE	UP
TC0100000375.mm.2	Stat1	1.45444	2.36125e-09	8.24087e-11	TRUE	UP
TC1100000965.mm.2	Kif1c; Mir6925	0.84038	2.37993e-09	8.31678e-11	TRUE	UP
TC1500000870.mm.2	Miox	1.07341	2.42841e-09	8.49713e-11	TRUE	UP
TC1600000346.mm.2	Rtp4	1.81024	2.46254e-09	8.64983e-11	TRUE	UP
TC1100001150.mm.2	Proca1	1.0565	2.50402e-09	8.8068e-11	TRUE	UP
TC1800000060.mm.2	Fzd8	1.65341	2.67194e-09	9.42145e-11	TRUE	UP
TC1800001181.mm.2	Tmem173	1.35433	2.69338e-09	9.51127e-11	TRUE	UP
TC1900000502.mm.2	Ifit3b	2.17866	2.77038e-09	9.81847e-11	TRUE	UP
TC0100003264.mm.2	Rgl1	0.944475	2.91055e-09	1.03392e-10	TRUE	UP
TC1600000475.mm.2	Heg1	0.937174	3.08448e-09	1.10289e-10	TRUE	UP
TC1100004053.mm.2	Cd300ld	1.58437	3.2395e-09	1.16415e-10	TRUE	UP
TC0200002796.mm.2	Ogfr	0.824167	3.35231e-09	1.20922e-10	TRUE	UP
TC1400002002.mm.2	Rnase2a	2.2792	3.44938e-09	1.24579e-10	TRUE	UP
TC1100004278.mm.2	Vps25	0.680888	3.49794e-09	1.26648e-10	TRUE	UP
TC0900003199.mm.2	Tgfbr2	0.995707	3.52242e-09	1.27693e-10	TRUE	UP
TC1100003326.mm.2	Evi2a; Evi2b; Gm21975	1.50207	3.52561e-09	1.27967e-10	TRUE	UP
TC0800001594.mm.2	Nrp1; Mir1903	0.976558	3.58919e-09	1.30437e-10	TRUE	UP
TC1200000203.mm.2	Rrm2	1.92406	3.69491e-09	1.34611e-10	TRUE	UP
TC1100002641.mm.2	Irgm1	1.41344	3.75853e-09	1.37099e-10	TRUE	UP
TC0500002068.mm.2	Fam126a	1.24873	3.78531e-09	1.38246e-10	TRUE	UP
TC1100001147.mm.2	Tlcd1; Mir7653	0.902971	3.90011e-09	1.42965e-10	TRUE	UP
TC0700004296.mm.2	Aldoa	0.948116	3.98258e-09	1.46347e-10	TRUE	UP
TC1600001557.mm.2	Dtx3l	0.914384	3.98672e-09	1.46679e-10	TRUE	UP
TC0200002366.mm.2	Trp53inp2	1.57101	4.02128e-09	1.48132e-10	TRUE	UP
TC0100003167.mm.2	Ptprc	1.17862	4.04865e-09	1.49661e-10	TRUE	UP
TC1200001663.mm.2	Ifrd1	2.11571	4.04865e-09	1.49719e-10	TRUE	UP
TC1900000188.mm.2	Fads1	0.641286	4.22674e-09	1.57032e-10	TRUE	UP
TC1500001002.mm.2	Tuba1c	1.07915	4.28047e-09	1.59221e-10	TRUE	UP
TC1700000622.mm.2	Psmb8	1.39339	4.38047e-09	1.63716e-10	TRUE	UP
TC1100002003.mm.2	Rnf213	1.78072	4.66325e-09	1.7451e-10	TRUE	UP
TC0200003601.mm.2	Ly75	1.21531	5.22614e-09	1.9628e-10	TRUE	UP
TC1000001576.mm.2	BC089597	1.08611	5.34179e-09	2.00865e-10	TRUE	UP
TC0700002705.mm.2	Nfkbib	0.865072	5.63671e-09	2.14239e-10	TRUE	UP
TC0600002663.mm.2	Rab43	1.17018	5.83443e-09	2.22016e-10	TRUE	UP
TC0900001431.mm.2	Shisa5	1.62841	6.04627e-09	2.30484e-10	TRUE	UP
TC0100001617.mm.2	Tagln2	1.65054	6.04627e-09	2.30805e-10	TRUE	UP
TC0300000137.mm.2	Cp	0.863587	6.04627e-09	2.30894e-10	TRUE	UP
TC1700002132.mm.2	Slc25a27	1.25591	6.14432e-09	2.35189e-10	TRUE	UP
TC0200000245.mm.2	Mrc1	0.889928	6.14432e-09	2.35192e-10	TRUE	UP
TC1900001630.mm.2	Sh3pxd2a	1.50551	6.17951e-09	2.36817e-10	TRUE	UP
TC0600001647.mm.2	Pik3c2g	1.0996	6.59568e-09	2.5336e-10	TRUE	UP
TC1500002199.mm.2	Tuba1b	0.879837	6.90905e-09	2.66304e-10	TRUE	UP
TC0100002324.mm.2	Mfsd6	1.32558	6.90905e-09	2.66331e-10	TRUE	UP
TC1200001908.mm.2	Dhrs7	1.06493	7.12103e-09	2.74823e-10	TRUE	UP
TC0100003401.mm.2	Fmo1	0.833822	7.42399e-09	2.87518e-10	TRUE	UP
TC1200002269.mm.2	Ifi27l2a	1.49284	7.45028e-09	2.88872e-10	TRUE	UP
TC1700001953.mm.2	Lst1	1.22969	7.52256e-09	2.92013e-10	TRUE	UP
TC1700000990.mm.2	Adgre4	1.46009	7.68296e-09	2.98586e-10	TRUE	UP
TC1100003506.mm.2	Scpep1	1.0108	7.90336e-09	3.07507e-10	TRUE	UP
TC0500002420.mm.2	Sel1l3	1.0588	8.25426e-09	3.22458e-10	TRUE	UP
TC1400002280.mm.2	Dpysl2	1.19703	8.3995e-09	3.28702e-10	TRUE	UP
TC0200002308.mm.2	Hck	1.58469	8.48086e-09	3.32268e-10	TRUE	UP
TC1900000501.mm.2	Ifit3	2.09025	8.84878e-09	3.48277e-10	TRUE	UP
TC1100002045.mm.2	Rac3	0.950833	9.31906e-09	3.67206e-10	TRUE	UP
TC0300002847.mm.2	Abcd3	0.938841	9.73496e-09	3.84471e-10	TRUE	UP
TC0300000766.mm.2	Pmvk	2.14545	9.79155e-09	3.87147e-10	TRUE	UP
TC0500000353.mm.2	Slc5a1	1.86683	1.03243e-08	4.09141e-10	TRUE	UP
TC0500002840.mm.2	Plac8	2.23801	1.04139e-08	4.13161e-10	TRUE	UP
TC1900000211.mm.2	Slc15a3	1.63553	1.08579e-08	4.31754e-10	TRUE	UP
TC1400000350.mm.2	1810011H11Rik	0.933351	1.10383e-08	4.39922e-10	TRUE	UP
TC0600003337.mm.2	Arhgdib	1.08281	1.11763e-08	4.45924e-10	TRUE	UP
TC0400004171.mm.2	Isg15	1.26426	1.11839e-08	4.47237e-10	TRUE	UP
TC0100003550.mm.2	Slamf7	1.34846	1.27146e-08	5.14161e-10	TRUE	UP
TC1400002869.mm.2	Phf11d; Phf11c	1.3431	1.27146e-08	5.14174e-10	TRUE	UP
TC1500002012.mm.2	Cerk	1.1825	1.28527e-08	5.20335e-10	TRUE	UP
TC0100003204.mm.2	Rgs2	1.6735	1.39383e-08	5.66169e-10	TRUE	UP
TC1500001727.mm.2	Ly6i	1.13815	1.40441e-08	5.71098e-10	TRUE	UP
TC1400001012.mm.2	Gfra2	1.38181	1.47075e-08	5.994e-10	TRUE	UP
TC0200002362.mm.2	Dynlrb1	0.956322	1.51894e-08	6.2041e-10	TRUE	UP
TC0400002601.mm.2	Trim14	1.09418	1.56208e-08	6.39437e-10	TRUE	UP
TC0200003017.mm.2	Nebl	1.07558	1.60199e-08	6.57937e-10	TRUE	UP
TC1500000939.mm.2	Ano6	1.08163	1.60294e-08	6.5905e-10	TRUE	UP
TC1700002779.mm.2	H2-DMb2	1.9367	1.6348e-08	6.72883e-10	TRUE	UP
TC1300001169.mm.2	Sgtb	1.25792	1.64747e-08	6.79583e-10	TRUE	UP
TC0900000655.mm.2	Gldn	1.43772	1.66987e-08	6.90329e-10	TRUE	UP
TC0600002045.mm.2	Akr1b3; Gm6644	0.921975	1.67564e-08	6.93683e-10	TRUE	UP
TC0200002367.mm.2	Acss2	2.00832	1.7367e-08	7.203e-10	TRUE	UP
TC1100000989.mm.2	Xaf1	1.77208	1.78498e-08	7.41933e-10	TRUE	UP
TC1100004159.mm.2	Lgals3bp	1.75866	1.87014e-08	7.79856e-10	TRUE	UP
TC0700000041.mm.2	Suv420h2	0.914982	1.90123e-08	7.97102e-10	TRUE	UP
TC1500001608.mm.2	A1bg	3.79275	1.95637e-08	8.22862e-10	TRUE	UP
TC0700000561.mm.2	Tyrobp	1.35183	1.96858e-08	8.28885e-10	TRUE	UP
TC0600000841.mm.2	St3gal5	1.92681	1.98776e-08	8.37857e-10	TRUE	UP
TC0900002213.mm.2	Sidt2	0.90433	2.01813e-08	8.51568e-10	TRUE	UP
TC0X00002061.mm.2	Ndufa1	0.874203	2.14887e-08	9.08669e-10	TRUE	UP
TC0100003697.mm.2	Lbr	1.03411	2.25142e-08	9.56088e-10	TRUE	UP
TC1700001034.mm.2	Adgre1	1.16754	2.2945e-08	9.75417e-10	TRUE	UP
TC0700002951.mm.2	Siglece	1.52359	2.30689e-08	9.81721e-10	TRUE	UP
TC0500000591.mm.2	Tbc1d1	0.885199	2.34758e-08	1.00009e-09	TRUE	UP
TC0500003028.mm.2	Sgsm1	1.78772	2.49157e-08	1.06256e-09	TRUE	UP
TC1500000688.mm.2	Apobec3	1.24743	2.5929e-08	1.10811e-09	TRUE	UP
TC0400002523.mm.2	Cd72	1.54418	2.63308e-08	1.12646e-09	TRUE	UP
TC1200000459.mm.2	1700047I17Rik2; Fam177a	0.936304	2.67856e-08	1.14834e-09	TRUE	UP
TC1200000461.mm.2	1700047I17Rik2; Fam177a	0.936304	2.67856e-08	1.14834e-09	TRUE	UP
TC1100004265.mm.2	Igtp	1.81078	2.6861e-08	1.15277e-09	TRUE	UP
TC0100001574.mm.2	Fcgr4	1.58603	2.72002e-08	1.16856e-09	TRUE	UP
TC1700001905.mm.2	H2-Aa	1.23618	2.76416e-08	1.19001e-09	TRUE	UP
TC0600003268.mm.2	Ybx3	1.00659	2.83928e-08	1.22619e-09	TRUE	UP
TC1200001237.mm.2	Tnfaip2	1.54933	2.88081e-08	1.24672e-09	TRUE	UP
TC0800000679.mm.2	44256	1.36469	2.95124e-08	1.27985e-09	TRUE	UP
TC1900000399.mm.2	Dock8	0.948424	3.19147e-08	1.38978e-09	TRUE	UP
TC1700002308.mm.2	Stap2	0.799764	3.23127e-08	1.41002e-09	TRUE	UP
TC0300001306.mm.2	Elovl6	2.47239	3.28056e-08	1.43449e-09	TRUE	UP
TC1500002347.mm.2	Parp10	1.01701	3.51044e-08	1.54291e-09	TRUE	UP
TC0900003335.mm.2	Uba7	0.868007	3.54724e-08	1.56072e-09	TRUE	UP
TC0200001045.mm.2	Itga6	1.06141	3.60234e-08	1.58979e-09	TRUE	UP
TC0X00001047.mm.2	Uprt	1.13332	3.70573e-08	1.63876e-09	TRUE	UP
TC1500001982.mm.2	Sult4a1	1.56248	3.71232e-08	1.64334e-09	TRUE	UP
TC0500003685.mm.2	N4bp2l1	1.27159	3.71474e-08	1.64609e-09	TRUE	UP
TC0800001031.mm.2	Adcy7	0.879855	3.85611e-08	1.71742e-09	TRUE	UP
TC0100003589.mm.2	Gm4955	1.34444	3.9134e-08	1.74469e-09	TRUE	UP
TC1600001580.mm.2	Cd86	1.17641	4.04186e-08	1.80379e-09	TRUE	UP
TC0800002403.mm.2	Ifi30	1.80272	4.36385e-08	1.95338e-09	TRUE	UP
TC0600002221.mm.2	Zfp467	1.13605	4.38686e-08	1.96763e-09	TRUE	UP
TC1700002781.mm.2	H2-Ab1	1.16991	4.65366e-08	2.09987e-09	TRUE	UP
TC1000002727.mm.2	Mrpl42	0.616938	4.72959e-08	2.13626e-09	TRUE	UP
TC0100000216.mm.2	Dst	1.65663	4.86038e-08	2.19753e-09	TRUE	UP
TC0700001913.mm.2	Htra1	1.27409	4.9033e-08	2.21914e-09	TRUE	UP
TC1800000535.mm.2	Snx24	1.10899	4.9972e-08	2.26839e-09	TRUE	UP
TC0400002580.mm.2	Shb	0.833967	5.01303e-08	2.27783e-09	TRUE	UP
TC0500000536.mm.2	Slc34a2	4.21366	5.10535e-08	2.32208e-09	TRUE	UP
TC0700004008.mm.2	Gm4759	1.10861	5.1761e-08	2.35892e-09	TRUE	UP
TC0700002143.mm.2	Lair1	1.25884	5.46326e-08	2.49471e-09	TRUE	UP
TC1100002015.mm.2	Baiap2	1.49083	5.53985e-08	2.53218e-09	TRUE	UP
TC0700000806.mm.2	Josd2; Mir7052	1.06078	5.64728e-08	2.58382e-09	TRUE	UP
TC1000002260.mm.2	Srgn	1.04605	5.69385e-08	2.61026e-09	TRUE	UP
TC1100004059.mm.2	Cd300e	1.62582	5.8895e-08	2.70261e-09	TRUE	UP
TC1700002823.mm.2	H2-T10	0.852464	5.9578e-08	2.73663e-09	TRUE	UP
TC0800002102.mm.2	Msr1	1.02458	5.98439e-08	2.75423e-09	TRUE	UP
TC1300002531.mm.2	Naip5	1.04221	6.16835e-08	2.84168e-09	TRUE	UP
TC0900002389.mm.2	Pml	0.982283	6.22887e-08	2.87236e-09	TRUE	UP
TC1500000784.mm.2	Samm50	0.823496	6.26149e-08	2.89022e-09	TRUE	UP
TC1300002481.mm.2	Hexb	1.13607	6.28414e-08	2.90351e-09	TRUE	UP
TC1800000396.mm.2	Rnf14	0.651957	6.34965e-08	2.93664e-09	TRUE	UP
TC0900000199.mm.2	AB124611	1.2325	6.42037e-08	2.97223e-09	TRUE	UP
TC0200004737.mm.2	Kif16b	0.772156	6.69135e-08	3.10069e-09	TRUE	UP
TC0400002434.mm.2	Ddx58	1.16174	6.69653e-08	3.10611e-09	TRUE	UP
TC1700001811.mm.2	Tff3	3.80725	6.79011e-08	3.15563e-09	TRUE	UP
TC0700004011.mm.2	Gm1966	1.29719	6.86232e-08	3.20155e-09	TRUE	UP
TC0100003240.mm.2	Prg4	1.61663	6.8827e-08	3.21416e-09	TRUE	UP
TC0100000792.mm.2	Cops7b	0.894366	7.04275e-08	3.29207e-09	TRUE	UP
TC0300002998.mm.2	Bank1	1.42308	7.1472e-08	3.34411e-09	TRUE	UP
TC0700004104.mm.2	Lyve1	1.78978	7.39105e-08	3.46154e-09	TRUE	UP
TC0700003406.mm.2	Klf13	1.22384	7.43713e-08	3.48647e-09	TRUE	UP
TC0800001407.mm.2	Plcg2	0.933442	7.43783e-08	3.49349e-09	TRUE	UP
TC0600000327.mm.2	Akr1b7	2.07241	7.44944e-08	3.50645e-09	TRUE	UP
TC0X00002393.mm.2	BC023829	1.10127	7.8416e-08	3.7008e-09	TRUE	UP
TC0600002811.mm.2	Gm765	0.949112	8.40691e-08	3.97517e-09	TRUE	UP
TC1300002691.mm.2	Gzma	1.16065	8.44689e-08	3.99788e-09	TRUE	UP
TC1900001095.mm.2	Fads2	0.930018	8.73451e-08	4.13794e-09	TRUE	UP
TC1300002517.mm.2	Ptcd2	0.608641	9.1641e-08	4.34971e-09	TRUE	UP
TC1100003314.mm.2	Lgals9	0.950779	9.2382e-08	4.39038e-09	TRUE	UP
TC0700002974.mm.2	Atf5	1.79158	9.67632e-08	4.61026e-09	TRUE	UP
TC0100001755.mm.2	Aida	0.700598	9.67975e-08	4.62933e-09	TRUE	UP
TC1000000674.mm.2	Slc16a9	1.05208	9.93631e-08	4.76545e-09	TRUE	UP
TC1300002090.mm.2	Klhl3	0.939982	1.08727e-07	5.23412e-09	TRUE	UP
TC1100001115.mm.2	Ssh2	0.987917	1.10628e-07	5.33062e-09	TRUE	UP
TC1100000681.mm.2	Gm12250	1.89226	1.10774e-07	5.34266e-09	TRUE	UP
TC1500000199.mm.2	Dap	0.784837	1.14295e-07	5.52275e-09	TRUE	UP
TC1700002819.mm.2	H2-T23	0.673714	1.14411e-07	5.53352e-09	TRUE	UP
TC0700004631.mm.2	Pirb	1.55543	1.1642e-07	5.63593e-09	TRUE	UP
TC0600003079.mm.2	C3ar1	1.40643	1.17902e-07	5.71299e-09	TRUE	UP
TC0X00001564.mm.2	2210013O21Rik	0.928007	1.18656e-07	5.75486e-09	TRUE	UP
TC1900000888.mm.2	Tcirg1	0.783514	1.28188e-07	6.25178e-09	TRUE	UP
TC1600000033.mm.2	Hmox2	0.691685	1.36532e-07	6.67102e-09	TRUE	UP
TC0X00002453.mm.2	G6pdx	1.55665	1.41794e-07	6.94729e-09	TRUE	UP
TC1200002154.mm.2	Ston2	1.11589	1.42731e-07	6.99965e-09	TRUE	UP
TC1200000225.mm.2	Cmpk2	1.87112	1.48361e-07	7.29577e-09	TRUE	UP
TC1700000684.mm.2	H2-Q4	0.765942	1.48394e-07	7.3041e-09	TRUE	UP
TC0400004221.mm.2	AU022252	0.743696	1.50881e-07	7.43331e-09	TRUE	UP
TC1900000500.mm.2	Ifit2	1.01348	1.54969e-07	7.64868e-09	TRUE	UP
TC1700001265.mm.2	Abcg8	2.21245	1.5741e-07	7.77624e-09	TRUE	UP
TC1600000861.mm.2	Usp25	0.6575	1.57675e-07	7.79641e-09	TRUE	UP
TC0900002451.mm.2	Kif23	1.04601	1.57768e-07	7.8081e-09	TRUE	UP
TC0100002993.mm.2	Actr3	0.703949	1.59527e-07	7.90953e-09	TRUE	UP
TC1000002647.mm.2	Spic	1.74694	1.62759e-07	8.08447e-09	TRUE	UP
TC1100002497.mm.2	Dock2	1.23732	1.64852e-07	8.21066e-09	TRUE	UP
TC0700002999.mm.2	Cd37	1.81272	1.67876e-07	8.37296e-09	TRUE	UP
TC0200005150.mm.2	Slc13a3	0.950833	1.67876e-07	8.37643e-09	TRUE	UP
TC0400003271.mm.2	Cdkn2c	0.797283	1.79911e-07	9.01755e-09	TRUE	UP
TC0600001398.mm.2	Clec4a3	1.51775	1.83929e-07	9.24368e-09	TRUE	UP
TC1700002788.mm.2	H2-Q8; H2-Q6	0.973243	1.87459e-07	9.42951e-09	TRUE	UP
TC1500001963.mm.2	Nfam1	1.24406	1.89495e-07	9.54043e-09	TRUE	UP
TC0900000753.mm.2	Myo9a	1.28351	1.97647e-07	9.9598e-09	TRUE	UP
TC0700003946.mm.2	Trim30d	1.22565	2.02712e-07	1.02424e-08	TRUE	UP
TC0100002314.mm.2	Gls	0.679112	2.06278e-07	1.04319e-08	TRUE	UP
TC1900001498.mm.2	Blnk	1.39906	2.16906e-07	1.10182e-08	TRUE	UP
TC1200001797.mm.2	Slc25a21	0.933895	2.18453e-07	1.11066e-08	TRUE	UP
TC1500001656.mm.2	Sla	1.30984	2.29081e-07	1.16676e-08	TRUE	UP
TC0100002967.mm.2	Marco	1.97882	2.35567e-07	1.20192e-08	TRUE	UP
TC0900001483.mm.2	Lrrfip2	0.772337	2.36828e-07	1.20942e-08	TRUE	UP
TC0500003061.mm.2	Mmab	0.792681	2.46865e-07	1.26289e-08	TRUE	UP
TC1800001402.mm.2	Synpo	0.861033	2.56525e-07	1.31462e-08	TRUE	UP
TC0900000751.mm.2	Pkm	1.32741	2.56669e-07	1.31652e-08	TRUE	UP
TC0300003106.mm.2	Prkacb	0.593822	2.57009e-07	1.32058e-08	TRUE	UP
TC0800002503.mm.2	Tmem184c	0.765018	2.57437e-07	1.32393e-08	TRUE	UP
TC0300002718.mm.2	Csf1	1.45464	2.65409e-07	1.37211e-08	TRUE	UP
TC1300000157.mm.2	Aoah	1.13444	2.68695e-07	1.39151e-08	TRUE	UP
TC0300000769.mm.2	Adar	0.929511	2.95912e-07	1.53779e-08	TRUE	UP
TC0800002429.mm.2	Plvap	0.987446	3.02135e-07	1.57149e-08	TRUE	UP
TC0800001420.mm.2	Osgin1	1.79866	3.13978e-07	1.64158e-08	TRUE	UP
TC0700003857.mm.2	Rhog	0.962917	3.14362e-07	1.645e-08	TRUE	UP
TC0400004216.mm.2	Podn	0.946685	3.23062e-07	1.69343e-08	TRUE	UP
TC1400001436.mm.2	Pdhb	0.800525	3.48948e-07	1.83698e-08	TRUE	UP
TC1200002518.mm.2	Asap2	1.8994	3.49437e-07	1.84113e-08	TRUE	UP
TC0700000444.mm.2	Cyp2g1	1.24118	3.51603e-07	1.85413e-08	TRUE	UP
TC0900002533.mm.2	Rab8b	0.938478	3.61175e-07	1.90623e-08	TRUE	UP
TC0700000886.mm.2	Tmem86a	0.889656	3.80048e-07	2.01439e-08	TRUE	UP
TC1700001993.mm.2	H2-T24	0.740888	3.80473e-07	2.01836e-08	TRUE	UP
TC0700001321.mm.2	Prcp	0.706069	3.8369e-07	2.03715e-08	TRUE	UP
TC0100003035.mm.2	Cd55b	0.927844	3.94612e-07	2.09779e-08	TRUE	UP
TC0500003043.mm.2	Cmklr1	1.06072	3.94612e-07	2.0987e-08	TRUE	UP
TC0700001841.mm.2	Itgal	1.11444	4.02126e-07	2.14047e-08	TRUE	UP
TC0700000285.mm.2	Dmpk	0.864547	4.09139e-07	2.17964e-08	TRUE	UP
TC0300001521.mm.2	Adgrl4	0.841612	4.13475e-07	2.2046e-08	TRUE	UP
TC1700001938.mm.2	D17H6S56E-5	2.01848	4.19382e-07	2.23799e-08	TRUE	UP
TC0400003200.mm.2	Pcsk9	1.02489	4.23151e-07	2.26026e-08	TRUE	UP
TC0900001103.mm.2	Bckdhb	0.613297	4.25758e-07	2.27968e-08	TRUE	UP
TC1400002067.mm.2	Slc7a8	1.48942	4.28426e-07	2.29783e-08	TRUE	UP
TC1700001986.mm.2	Atat1	0.949638	4.29555e-07	2.30582e-08	TRUE	UP
TC0500001992.mm.2	Cd36	1.08275	4.48805e-07	2.41925e-08	TRUE	UP
TC0300000925.mm.2	Mtmr11	0.93587	4.49817e-07	2.42674e-08	TRUE	UP
TC0200003280.mm.2	Tor1a	0.667591	4.73204e-07	2.55717e-08	TRUE	UP
TC1200001974.mm.2	Tmem229b	1.1527	4.84049e-07	2.62231e-08	TRUE	UP
TC0400000996.mm.2	Atg4c	0.782989	4.92624e-07	2.67543e-08	TRUE	UP
TC0400001276.mm.2	Ptch2	0.806721	4.98667e-07	2.71498e-08	TRUE	UP
TC0200002170.mm.2	Naa20	0.855543	5.10152e-07	2.78522e-08	TRUE	UP
TC0900001046.mm.2	Ick	0.872083	5.10362e-07	2.79015e-08	TRUE	UP
TC0500003731.mm.2	Gbp4	1.07748	5.11352e-07	2.79786e-08	TRUE	UP
TC0X00001625.mm.2	Sh3kbp1	1.10279	5.13704e-07	2.81304e-08	TRUE	UP
TC1100003037.mm.2	Chd3	0.687754	5.18647e-07	2.84378e-08	TRUE	UP
TC1200000098.mm.2	Fam49a	0.813732	5.18647e-07	2.84478e-08	TRUE	UP
TC1300001911.mm.2	Atxn1	1.39672	5.34747e-07	2.94272e-08	TRUE	UP
TC0100002656.mm.2	Dock10	1.0127	5.4752e-07	3.01794e-08	TRUE	UP
TC0600003264.mm.2	Klra2	1.1312	5.47885e-07	3.02242e-08	TRUE	UP
TC0300001006.mm.2	Vtcn1	1.25458	5.62569e-07	3.11517e-08	TRUE	UP
TC1700000685.mm.2	H2-Q5	0.920272	5.62569e-07	3.11609e-08	TRUE	UP
TC0X00002712.mm.2	Snx12	0.952953	5.74112e-07	3.18262e-08	TRUE	UP
TC0500003219.mm.2	Camkk2	0.837428	5.78119e-07	3.21004e-08	TRUE	UP
TC0X00002472.mm.2	F8	0.771685	6.09986e-07	3.39522e-08	TRUE	UP
TC0500002756.mm.2	Cxcl10	1.58036	6.15418e-07	3.42823e-08	TRUE	UP
TC1900001056.mm.2	Slc22a26	1.28368	6.23038e-07	3.47348e-08	TRUE	UP
TC0800000758.mm.2	Lrrc25	1.08745	6.3646e-07	3.55117e-08	TRUE	UP
TC0400000133.mm.2	Tmem64	0.683333	6.38596e-07	3.56597e-08	TRUE	UP
TC0500000527.mm.2	Sod3	1.15656	6.40872e-07	3.58273e-08	TRUE	UP
TC1000002930.mm.2	Lyz1	1.13672	6.40872e-07	3.58445e-08	TRUE	UP
TC1000001587.mm.2	Baz2a	0.991612	6.43965e-07	3.60465e-08	TRUE	UP
TC1600000529.mm.2	Hcls1	1.27174	6.51385e-07	3.64943e-08	TRUE	UP
TC1200000959.mm.2	Gpr65	1.20178	6.51385e-07	3.65205e-08	TRUE	UP
TC0900001459.mm.2	Scap	0.908605	6.70425e-07	3.77088e-08	TRUE	UP
TC0700002786.mm.2	Fxyd5; Mir7050	1.42444	6.83424e-07	3.85322e-08	TRUE	UP
TC1900001425.mm.2	Slc16a12	1.2004	6.8389e-07	3.85893e-08	TRUE	UP
TC1400000363.mm.2	Gdf10	1.27065	6.92854e-07	3.91814e-08	TRUE	UP
TC1500002200.mm.2	Tuba1a	0.90875	6.92854e-07	3.91887e-08	TRUE	UP
TC0100002285.mm.2	Slc40a1	0.989783	6.9317e-07	3.92378e-08	TRUE	UP
TC0X00003359.mm.2	Tlr8	1.03743	7.11274e-07	4.03587e-08	TRUE	UP
TC1100004266.mm.2	Irgm2	1.2804	7.19497e-07	4.08577e-08	TRUE	UP
TC0500003615.mm.2	Usp12	0.628786	7.53946e-07	4.28479e-08	TRUE	UP
TC1300000724.mm.2	Naa35	0.670507	7.5918e-07	4.31795e-08	TRUE	UP
TC0400000726.mm.2	6330416G13Rik	0.862572	7.68739e-07	4.37924e-08	TRUE	UP
TC0400003249.mm.2	Prpf38a	0.773478	7.81524e-07	4.46615e-08	TRUE	UP
TC0900002197.mm.2	Il10ra	0.937464	8.22255e-07	4.71743e-08	TRUE	UP
TC0100003422.mm.2	Atp1b1	0.789674	8.26658e-07	4.75014e-08	TRUE	UP
TC1900000504.mm.2	Ifit1	2.29328	8.30329e-07	4.77497e-08	TRUE	UP
TC0100001615.mm.2	Slamf9	0.993098	8.36043e-07	4.81506e-08	TRUE	UP
TC1200001761.mm.2	Gm2436	0.633931	8.36516e-07	4.82562e-08	TRUE	UP
TC1100001267.mm.2	Wfdc21	0.822428	8.43252e-07	4.87207e-08	TRUE	UP
TC0700003597.mm.2	Iqgap1	0.992156	8.57214e-07	4.9566e-08	TRUE	UP
TC0500001574.mm.2	Dnajc30	0.755688	8.93186e-07	5.16862e-08	TRUE	UP
TC1000001024.mm.2	Rfx4	2.06152	9.12809e-07	5.29039e-08	TRUE	UP
TC1100000343.mm.2	Stk10	1.12868	9.27556e-07	5.38004e-08	TRUE	UP
TC1300001922.mm.2	Kif13a	0.852446	9.36114e-07	5.4339e-08	TRUE	UP
TC0100001370.mm.2	Ncf2	1.35355	9.54651e-07	5.5501e-08	TRUE	UP
TC0600002978.mm.2	Rassf4	0.975942	9.55554e-07	5.55965e-08	TRUE	UP
TC1500000037.mm.2	Fyb	1.04288	9.6292e-07	5.60684e-08	TRUE	UP
TC0500003738.mm.2	Pcolce	1.15995	9.7328e-07	5.67155e-08	TRUE	UP
TC0500001038.mm.2	Lrrc8b	0.858551	9.76496e-07	5.69469e-08	TRUE	UP
TC0400000913.mm.2	Mtap	0.81096	9.78032e-07	5.70805e-08	TRUE	UP
TC1100001474.mm.2	Gngt2	0.825308	9.79035e-07	5.71831e-08	TRUE	UP
TC0500001043.mm.2	Lrrc8c	0.703007	1.01901e-06	5.96095e-08	TRUE	UP
TC1400001451.mm.2	Gm3839	0.583859	1.01968e-06	5.97384e-08	TRUE	UP
TC0200000572.mm.2	Pomt1	0.720652	1.01968e-06	5.97409e-08	TRUE	UP
TC1200002203.mm.2	Foxn3	0.818714	1.03753e-06	6.08798e-08	TRUE	UP
TC1900001137.mm.2	Ms4a6d	1.18851	1.03891e-06	6.10077e-08	TRUE	UP
TC0X00000388.mm.2	Gria3	1.2192	1.04129e-06	6.11943e-08	TRUE	UP
TC0700004003.mm.2	Gm18853	1.47058	1.04293e-06	6.14046e-08	TRUE	UP
TC0400000743.mm.2	Tlr4	0.872917	1.04293e-06	6.14317e-08	TRUE	UP
TC0900002541.mm.2	Tpm1	0.848678	1.11006e-06	6.56857e-08	TRUE	UP
TC1000000733.mm.2	Zfp280b	0.945616	1.11769e-06	6.62382e-08	TRUE	UP
TC1200000419.mm.2	Ap4s1	0.629438	1.15344e-06	6.84603e-08	TRUE	UP
TC1000000653.mm.2	Tmem26	0.929964	1.17489e-06	6.97864e-08	TRUE	UP
TC0700004632.mm.2	Gm15922; Pira1	1.15351	1.18849e-06	7.07659e-08	TRUE	UP
TC0900002613.mm.2	Tcf12	0.697101	1.21679e-06	7.26587e-08	TRUE	UP
TC0200003051.mm.2	Pip4k2a	0.757355	1.21743e-06	7.2752e-08	TRUE	UP
TC1300002474.mm.2	Hmgcr	2.01995	1.22137e-06	7.30974e-08	TRUE	UP
TC1000001366.mm.2	Cpm	0.885924	1.26893e-06	7.61151e-08	TRUE	UP
TC1900001479.mm.2	Cyp2c40	1.92643	1.28809e-06	7.73804e-08	TRUE	UP
TC1500002313.mm.2	Nfe2	1.19031	1.29608e-06	7.79191e-08	TRUE	UP
TC1000000465.mm.2	Dcbld1	0.670326	1.31259e-06	7.89706e-08	TRUE	UP
TC0700001098.mm.2	Klhl25	0.989692	1.31278e-06	7.90412e-08	TRUE	UP
TC0800000814.mm.2	Tpm4	0.800127	1.32717e-06	7.99672e-08	TRUE	UP
TC0900001182.mm.2	Slc9a9	0.828351	1.36448e-06	8.23381e-08	TRUE	UP
TC1800001197.mm.2	Cd14	1.57239	1.38754e-06	8.37924e-08	TRUE	UP
TC0600003335.mm.2	Mgp	1.01788	1.43664e-06	8.69516e-08	TRUE	UP
TC1800000617.mm.2	Cd74; Mir5107	1.21179	1.43666e-06	8.70174e-08	TRUE	UP
TC1100001661.mm.2	Tmem106a	0.731884	1.45005e-06	8.80242e-08	TRUE	UP
TC1200000253.mm.2	Pxdn	0.779764	1.47941e-06	9.00732e-08	TRUE	UP
TC0200001226.mm.2	Slc43a3	0.679239	1.48853e-06	9.06955e-08	TRUE	UP
TC0100003590.mm.2	BC094916	1.14237	1.49408e-06	9.11007e-08	TRUE	UP
TC0300002972.mm.2	Npnt	1.00475	1.50094e-06	9.15869e-08	TRUE	UP
TC1900000118.mm.2	Rasgrp2	0.722011	1.51825e-06	9.27114e-08	TRUE	UP
TC0X00002161.mm.2	Elf4	1.08663	1.54341e-06	9.43867e-08	TRUE	UP
TC0900001616.mm.2	Trak1	0.736033	1.54383e-06	9.44819e-08	TRUE	UP
TC0900002870.mm.2	Pls1	0.851341	1.56515e-06	9.59193e-08	TRUE	UP
TC1900000217.mm.2	Ms4a4c	1.68451	1.57385e-06	9.66026e-08	TRUE	UP
TC0200004396.mm.2	Rasgrp1	1.04513	1.59276e-06	9.7907e-08	TRUE	UP
TC0200003866.mm.2	Tfpi	0.7	1.5959e-06	9.81714e-08	TRUE	UP
TC1100003379.mm.2	Slfn9	0.962391	1.63352e-06	1.00639e-07	TRUE	UP
TC0900000365.mm.2	Robo4	0.629964	1.63352e-06	1.00706e-07	TRUE	UP
TC0100000334.mm.2	Ercc5	0.766975	1.6437e-06	1.01408e-07	TRUE	UP
TC0100001356.mm.2	Fam129a	0.821341	1.70727e-06	1.05638e-07	TRUE	UP
TC1000001947.mm.2	Ncoa7	0.636413	1.72275e-06	1.06751e-07	TRUE	UP
TC0500000926.mm.2	Fras1	0.857572	1.74451e-06	1.08177e-07	TRUE	UP
TC0700001756.mm.2	Prkcb	1.11067	1.77354e-06	1.10217e-07	TRUE	UP
TC0100001387.mm.2	Glul; Mir8114	0.655924	1.78332e-06	1.10905e-07	TRUE	UP
TC1200002263.mm.2	Asb2	0.940906	1.84021e-06	1.14692e-07	TRUE	UP
TC0X00000916.mm.2	Msn	0.805978	1.86843e-06	1.16619e-07	TRUE	UP
TC0X00001069.mm.2	Tlr13	1.4365	1.87192e-06	1.16921e-07	TRUE	UP
TC1900000646.mm.2	Scd2; Mir5114	1.2102	1.88882e-06	1.18147e-07	TRUE	UP
TC1900000221.mm.2	Ms4a6c	1.19833	1.92984e-06	1.20974e-07	TRUE	UP
TC0600002684.mm.2	Kbtbd12	0.844221	1.96397e-06	1.23201e-07	TRUE	UP
TC1700002804.mm.2	Pigq	0.856594	1.98217e-06	1.24432e-07	TRUE	UP
TC1300000612.mm.2	Syk	0.899547	1.99484e-06	1.25317e-07	TRUE	UP
TC0100001252.mm.2	Csrp1	1.09036	2.04424e-06	1.28605e-07	TRUE	UP
TC1400000316.mm.2	Mustn1	1.17757	2.05108e-06	1.29128e-07	TRUE	UP
TC0300002054.mm.2	P2ry12	1.06645	2.06908e-06	1.30354e-07	TRUE	UP
TC0100001397.mm.2	Stx6	0.796721	2.08293e-06	1.31361e-07	TRUE	UP
TC0X00002158.mm.2	Zdhhc9	0.617047	2.08381e-06	1.31563e-07	TRUE	UP
TC1100003097.mm.2	Cxcl16	0.9425	2.09583e-06	1.32417e-07	TRUE	UP
TC0200005290.mm.2	Zbp1	1.18141	2.13702e-06	1.35212e-07	TRUE	UP
TC1600001604.mm.2	Pla1a	0.607446	2.18837e-06	1.38559e-07	TRUE	UP
TC0400004177.mm.2	Akap2	0.844257	2.22654e-06	1.41277e-07	TRUE	UP
TC0600002422.mm.2	Gadd45a	0.915761	2.25867e-06	1.4362e-07	TRUE	UP
TC1900001774.mm.2	Lipo1	0.91183	2.2677e-06	1.44297e-07	TRUE	UP
TC0700001116.mm.2	Isg20	0.98413	2.28696e-06	1.45789e-07	TRUE	UP
TC1600002110.mm.2	Cldn14	0.987518	2.28696e-06	1.45832e-07	TRUE	UP
TC1700000513.mm.2	Zfand3	0.648478	2.29554e-06	1.46586e-07	TRUE	UP
TC0700000402.mm.2	Cd79a	1.51768	2.34552e-06	1.49882e-07	TRUE	UP
TC0100001510.mm.2	Dpt	1.40341	2.36031e-06	1.5104e-07	TRUE	UP
TC0900003125.mm.2	Ccrl2	0.952192	2.39412e-06	1.53419e-07	TRUE	UP
TC1500002247.mm.2	Bin2	1.2619	2.41491e-06	1.54969e-07	TRUE	UP
TC1900000441.mm.2	Cd274	1.19482	2.41518e-06	1.55095e-07	TRUE	UP
TC1000002878.mm.2	Glipr1	1.02406	2.46173e-06	1.58196e-07	TRUE	UP
TC0700001520.mm.2	Trim34b; Trim34a	1.04964	2.51046e-06	1.61553e-07	TRUE	UP
TC0900000046.mm.2	Mmp12	2.25109	2.54007e-06	1.63687e-07	TRUE	UP
TC0100003443.mm.2	Dcaf6	1.11888	2.61161e-06	1.6865e-07	TRUE	UP
TC1400000501.mm.2	Cdkn3	0.997591	2.63588e-06	1.70336e-07	TRUE	UP
TC0500000349.mm.2	Ywhah	0.798351	2.69371e-06	1.74316e-07	TRUE	UP
TC1700000835.mm.2	Pla2g7	1.24565	2.73013e-06	1.76796e-07	TRUE	UP
TC0600001397.mm.2	Clec4a1	1.14054	2.74543e-06	1.78034e-07	TRUE	UP
TC1100002783.mm.2	Sparc	1.02297	2.76434e-06	1.79509e-07	TRUE	UP
TC0200001998.mm.2	Atrn	0.671793	2.78723e-06	1.81247e-07	TRUE	UP
TC0500003095.mm.2	Dynll1	1.07139	2.79166e-06	1.8166e-07	TRUE	UP
TC1700000418.mm.2	Atp6v0e	0.631214	2.84029e-06	1.85209e-07	TRUE	UP
TC0200003698.mm.2	Abcb11	0.910616	2.85877e-06	1.86542e-07	TRUE	UP
TC0100003524.mm.2	Fcgr3	0.902246	2.91074e-06	1.90196e-07	TRUE	UP
TC0900001425.mm.2	Slc26a6	0.763623	2.9312e-06	1.91665e-07	TRUE	UP
TC0300000528.mm.2	Tiparp	0.929022	3.00516e-06	1.96636e-07	TRUE	UP
TC1300001777.mm.2	Serpinb6a	0.756504	3.00523e-06	1.96776e-07	TRUE	UP
TC1700000765.mm.2	H2-M3	0.886721	3.02472e-06	1.98325e-07	TRUE	UP
TC1500001729.mm.2	Ly6c1	1.92098	3.05439e-06	2.00545e-07	TRUE	UP
TC0400003653.mm.2	Epb41	0.865272	3.19973e-06	2.10664e-07	TRUE	UP
TC1400002161.mm.2	Phf11a	0.890163	3.25468e-06	2.14575e-07	TRUE	UP
TC1000002420.mm.2	Adarb1	0.871667	3.31467e-06	2.18679e-07	TRUE	UP
TC0100001176.mm.2	Slc41a1	0.942065	3.33797e-06	2.20367e-07	TRUE	UP
TC0800002842.mm.2	Psmb10	0.962373	3.38015e-06	2.23456e-07	TRUE	UP
TC1200000145.mm.2	Hpcal1	0.736812	3.39194e-06	2.24388e-07	TRUE	UP
TC1300001562.mm.2	Hist1h2an	0.858931	3.40167e-06	2.25185e-07	TRUE	UP
TC0300003013.mm.2	Dapp1	1.07922	3.48151e-06	2.30783e-07	TRUE	UP
TC1200002411.mm.2	Ckb	0.634475	3.53741e-06	2.34808e-07	TRUE	UP
TC0700003936.mm.2	Trim5	0.910036	3.61608e-06	2.40518e-07	TRUE	UP
TC1100000442.mm.2	Ebf1	0.975308	3.71453e-06	2.47569e-07	TRUE	UP
TC0300002982.mm.2	Tet2	0.922862	3.71595e-06	2.47921e-07	TRUE	UP
TC0X00000685.mm.2	Bgn	0.792772	3.71943e-06	2.48565e-07	TRUE	UP
TC0400002151.mm.2	Cyp7a1	1.91868	3.73045e-06	2.4947e-07	TRUE	UP
TC0300000060.mm.2	Fabp5	2.26053	3.75578e-06	2.51502e-07	TRUE	UP
TC1400002632.mm.2	Kctd12; Mir5130	0.849909	3.78454e-06	2.53598e-07	TRUE	UP
TC0900000031.mm.2	Casp1	0.81692	3.87296e-06	2.60046e-07	TRUE	UP
TC0900002778.mm.2	Gm17530	3.0217	3.97736e-06	2.67414e-07	TRUE	UP
TC1000000171.mm.2	Sgk1	1.20803	3.99805e-06	2.68985e-07	TRUE	UP
TC1600000305.mm.2	Map3k13	1.28161	4.18437e-06	2.82086e-07	TRUE	UP
TC1300001140.mm.2	Ccdc125	0.818188	4.24028e-06	2.86046e-07	TRUE	UP
TC1900001428.mm.2	Pank1	0.694221	4.26794e-06	2.88297e-07	TRUE	UP
TC1700001381.mm.2	Dynlt1a	0.629656	4.32166e-06	2.92704e-07	TRUE	UP
TC0600001648.mm.2	Pik3c2g	0.718605	4.36321e-06	2.95911e-07	TRUE	UP
TC1100001276.mm.2	Acaca	1.55326	4.37888e-06	2.97171e-07	TRUE	UP
TC1300001006.mm.2	Hapln1	1.92877	4.39262e-06	2.98499e-07	TRUE	UP
TC1000002036.mm.2	Slc16a10	0.785453	4.53948e-06	3.09705e-07	TRUE	UP
TC0200001866.mm.2	Sema6d	0.677935	4.57687e-06	3.12462e-07	TRUE	UP
TC1700002782.mm.2	H2-Eb1	1.02254	4.57771e-06	3.12726e-07	TRUE	UP
TC0300002504.mm.2	Hist2h4	0.664601	4.65821e-06	3.18645e-07	TRUE	UP
TC0500002596.mm.2	Sgcb	0.762482	4.66503e-06	3.19532e-07	TRUE	UP
TC1800000163.mm.2	Rnf138	0.589257	4.69022e-06	3.21468e-07	TRUE	UP
TC1100002550.mm.2	Ccng1	0.642319	4.72692e-06	3.24622e-07	TRUE	UP
TC0500003050.mm.2	Selplg	1.00819	4.76088e-06	3.27383e-07	TRUE	UP
TC1700000621.mm.2	Tap1	0.886757	4.86647e-06	3.34863e-07	TRUE	UP
TC0700003829.mm.2	P2ry6	0.654004	4.99847e-06	3.44846e-07	TRUE	UP
TC1600001134.mm.2	Coro7	0.590942	5.11374e-06	3.5326e-07	TRUE	UP
TC0900001635.mm.2	Snrk	0.895725	5.13425e-06	3.54908e-07	TRUE	UP
TC0200004196.mm.2	Gm10800	1.41524	5.17776e-06	3.58148e-07	TRUE	UP
TC0100003871.mm.2	Tstd1	1.00971	5.23672e-06	3.62934e-07	TRUE	UP
TC1300002076.mm.2	Tifab	0.726087	5.28819e-06	3.67454e-07	TRUE	UP
TC1100003115.mm.2	Scimp	0.890453	5.50882e-06	3.83528e-07	TRUE	UP
TC1200002270.mm.2	Ifi27l2b	1.43944	5.56523e-06	3.87707e-07	TRUE	UP
TC0100003258.mm.2	1700025G04Rik	0.839982	5.6974e-06	3.97171e-07	TRUE	UP
TC1800001655.mm.2	Hsbp1l1	1.02322	5.70597e-06	3.98045e-07	TRUE	UP
TC0900002529.mm.2	Aph1b	0.881739	5.71176e-06	3.98944e-07	TRUE	UP
TC0900001987.mm.2	Fli1	0.948025	5.80569e-06	4.05766e-07	TRUE	UP
TC1600001349.mm.2	Alg3	0.635562	5.88626e-06	4.11941e-07	TRUE	UP
TC0200001959.mm.2	Sirpa	1.17429	5.92624e-06	4.15258e-07	TRUE	UP
TC0300002994.mm.2	Nfkb1	0.705942	6.02135e-06	4.22736e-07	TRUE	UP
TC1800000184.mm.2	Mapre2	0.90192	6.14736e-06	4.32002e-07	TRUE	UP
TC0700003710.mm.2	Tmem135	0.73808	6.14971e-06	4.32579e-07	TRUE	UP
TC1500000725.mm.2	Aco2	0.766685	6.17171e-06	4.34682e-07	TRUE	UP
TC0600003169.mm.2	Ccnd2	0.736431	6.31205e-06	4.45158e-07	TRUE	UP
TC1500000554.mm.2	BC025446	0.618478	6.3489e-06	4.48831e-07	TRUE	UP
TC1100003466.mm.2	Gdpd1	1.07179	6.41638e-06	4.53937e-07	TRUE	UP
TC1500000640.mm.2	Ncf4	0.946938	6.47332e-06	4.59132e-07	TRUE	UP
TC1100001451.mm.2	Ppp1r9b	0.80087	6.55553e-06	4.65553e-07	TRUE	UP
TC1200001552.mm.2	Rsad2	1.51813	6.60459e-06	4.6992e-07	TRUE	UP
TC0400000720.mm.2	Orm3	2.42145	6.60459e-06	4.69929e-07	TRUE	UP
TC0700002970.mm.2	Nr1h2	0.676105	6.64683e-06	4.73234e-07	TRUE	UP
TC0200003151.mm.2	Ptgds	1.47723	6.67156e-06	4.75596e-07	TRUE	UP
TC0800002188.mm.2	Tenm3	0.698351	6.82218e-06	4.86947e-07	TRUE	UP
TC1300001395.mm.2	Pfkp	0.700163	6.94768e-06	4.96531e-07	TRUE	UP
TC1100003600.mm.2	Abi3	0.835815	6.97288e-06	4.98646e-07	TRUE	UP
TC0X00000424.mm.2	Ocrl	0.764312	7.03378e-06	5.03952e-07	TRUE	UP
TC1300002541.mm.2	Mrps36	0.669022	7.04819e-06	5.05619e-07	TRUE	UP
TC1900001342.mm.2	Plgrkt	1.0154	7.19057e-06	5.17128e-07	TRUE	UP
TC1900000246.mm.2	Mpeg1	1.37784	7.29873e-06	5.25235e-07	TRUE	UP
TC1000000778.mm.2	Icosl	0.852319	7.41294e-06	5.34122e-07	TRUE	UP
TC1000002253.mm.2	Tspan15	0.581123	7.81985e-06	5.65906e-07	TRUE	UP
TC1400000246.mm.2	Ppif	0.941667	8.00839e-06	5.79911e-07	TRUE	UP
TC1100004233.mm.2	Fasn	2.20368	8.26452e-06	6.00318e-07	TRUE	UP
TC0200001158.mm.2	Itga4	0.840489	8.30499e-06	6.03632e-07	TRUE	UP
TC0800002146.mm.2	Tlr3	0.916051	8.49867e-06	6.18475e-07	TRUE	UP
TC1500001131.mm.2	Nckap1l	1.08908	8.54907e-06	6.22528e-07	TRUE	UP
TC0X00002247.mm.2	Xlr	0.948931	8.55422e-06	6.23288e-07	TRUE	UP
TC0100000822.mm.2	Inpp5d	0.889873	8.73072e-06	6.36541e-07	TRUE	UP
TC0200000636.mm.2	Gsn	1.03683	8.8264e-06	6.44312e-07	TRUE	UP
TC1000000402.mm.2	Cd24a	0.856087	9.12882e-06	6.67622e-07	TRUE	UP
TC0100001496.mm.2	Sell	1.81596	9.13439e-06	6.6844e-07	TRUE	UP
TC0900002770.mm.2	Fam46a	0.833496	9.34986e-06	6.8505e-07	TRUE	UP
TC0600003139.mm.2	Tapbpl	0.651051	9.4806e-06	6.95483e-07	TRUE	UP
TC0100003037.mm.2	Cd55	0.675833	9.51093e-06	6.98136e-07	TRUE	UP
TC0500003175.mm.2	Oas2	0.962627	9.55408e-06	7.01734e-07	TRUE	UP
TC1700000625.mm.2	H2-Ob	1.16596	9.62552e-06	7.08282e-07	TRUE	UP
TC1000003122.mm.2	Gpr182	0.687264	9.85734e-06	7.26228e-07	TRUE	UP
TC0400000349.mm.2	Dnaja1; Mir207	0.770978	9.87483e-06	7.27961e-07	TRUE	UP
TC0200004511.mm.2	Gatm	0.738333	1.02955e-05	7.61291e-07	TRUE	UP
TC1800000286.mm.2	Pkd2l2	0.814257	1.03384e-05	7.65226e-07	TRUE	UP
TC1400002834.mm.2	Irf9	0.869402	1.04775e-05	7.7805e-07	TRUE	UP
TC1100002575.mm.2	Adra1b	0.92087	1.08998e-05	8.12843e-07	TRUE	UP
TC1100000614.mm.2	Irf1	0.666304	1.09203e-05	8.14864e-07	TRUE	UP
TC1100000134.mm.2	Ikzf1	0.732609	1.09959e-05	8.21002e-07	TRUE	UP
TC1400001988.mm.2	Tep1	0.733623	1.09979e-05	8.21651e-07	TRUE	UP
TC1400002430.mm.2	Slc25a30	2.1023	1.10971e-05	8.30057e-07	TRUE	UP
TC1900001506.mm.2	Pik3ap1	1.01413	1.11533e-05	8.35264e-07	TRUE	UP
TC1900000255.mm.2	Lpxn	0.833514	1.12776e-05	8.45594e-07	TRUE	UP
TC1800000741.mm.2	Tcf4	0.836993	1.13717e-05	8.54181e-07	TRUE	UP
TC1700000061.mm.2	Dynlt1c; Dynlt1f	0.650399	1.1656e-05	8.76065e-07	TRUE	UP
TC0200005030.mm.2	Tgm2	1.05516	1.17215e-05	8.81514e-07	TRUE	UP
TC0X00001922.mm.2	Slc9a7	0.791594	1.17764e-05	8.86297e-07	TRUE	UP
TC1000002164.mm.2	Cep85l	0.841395	1.19474e-05	9.00987e-07	TRUE	UP
TC0900001005.mm.2	Fam214a	1.11438	1.19474e-05	9.01196e-07	TRUE	UP
TC1900000916.mm.2	Adrbk1	0.61788	1.21986e-05	9.20688e-07	TRUE	UP
TC1200000200.mm.2	Grhl1	0.639094	1.22207e-05	9.23275e-07	TRUE	UP
TC0900002875.mm.2	Atp1b3	0.65058	1.22481e-05	9.27184e-07	TRUE	UP
TC0300001610.mm.2	Il7	1.11645	1.23521e-05	9.35612e-07	TRUE	UP
TC0800001867.mm.2	Slc25a15	0.588587	1.25502e-05	9.53443e-07	TRUE	UP
TC0900001430.mm.2	Pfkfb4	1.03853	1.26633e-05	9.62607e-07	TRUE	UP
TC1300001868.mm.2	Adtrp	0.635797	1.26969e-05	9.66308e-07	TRUE	UP
TC1400001872.mm.2	Ear10	0.832228	1.28264e-05	9.77314e-07	TRUE	UP
TC0200000741.mm.2	Arhgap15	1.20538	1.29775e-05	9.89998e-07	TRUE	UP
TC0800001511.mm.2	Dpep1	0.753351	1.3105e-05	1.00031e-06	TRUE	UP
TC0600000277.mm.2	Mest	1.20034	1.38792e-05	1.06378e-06	TRUE	UP
TC1900001030.mm.2	Fermt3	1.11109	1.40708e-05	1.07974e-06	TRUE	UP
TC0300002492.mm.2	Plekho1	0.834982	1.40971e-05	1.08239e-06	TRUE	UP
TC1600002148.mm.2	Mx1	1.14721	1.41252e-05	1.08582e-06	TRUE	UP
TC1200001490.mm.2	Adam17	0.62817	1.43171e-05	1.10186e-06	TRUE	UP
TC0400003417.mm.2	Zfp691	0.862989	1.47538e-05	1.1415e-06	TRUE	UP
TC1800000704.mm.2	Tubb6	1.09005	1.47538e-05	1.14278e-06	TRUE	UP
TC0700002078.mm.2	Lsp1	0.834565	1.50212e-05	1.16687e-06	TRUE	UP
TC0400000018.mm.2	Chchd7	0.625344	1.54e-05	1.19907e-06	TRUE	UP
TC1900000572.mm.2	Entpd1	0.673986	1.54583e-05	1.20431e-06	TRUE	UP
TC1200002507.mm.2	Sp4	0.849819	1.5535e-05	1.21238e-06	TRUE	UP
TC1800001595.mm.2	Lipg	1.4023	1.56527e-05	1.22298e-06	TRUE	UP
TC1100003779.mm.2	Dhx58	1.18531	1.57775e-05	1.23344e-06	TRUE	UP
TC0700003517.mm.2	Slco3a1	0.806721	1.58345e-05	1.23868e-06	TRUE	UP
TC1000001190.mm.2	Lum	1.16591	1.58345e-05	1.23932e-06	TRUE	UP
TC0700000972.mm.2	E030018B13Rik	2.15774	1.62706e-05	1.27785e-06	TRUE	UP
TC1100004217.mm.2	Arhgdia	0.634402	1.62824e-05	1.27951e-06	TRUE	UP
TC0800001572.mm.2	Kcnk1	0.978696	1.63242e-05	1.28453e-06	TRUE	UP
TC0900002532.mm.2	Aph1c	0.820707	1.63242e-05	1.285e-06	TRUE	UP
TC1700002438.mm.2	Ptprm	0.808569	1.64738e-05	1.29751e-06	TRUE	UP
TC0400001715.mm.2	Eif4g3	0.634438	1.65886e-05	1.30731e-06	TRUE	UP
TC1900000247.mm.2	Fam111a	0.828388	1.70271e-05	1.34263e-06	TRUE	UP
TC0300001850.mm.2	Anxa5	0.672138	1.72291e-05	1.36088e-06	TRUE	UP
TC1500002141.mm.2	Slc38a1	0.90788	1.75403e-05	1.38942e-06	TRUE	UP
TC0800002819.mm.2	Fhod1	0.737953	1.77361e-05	1.40572e-06	TRUE	UP
TC1100002374.mm.2	Rel	0.694909	1.77466e-05	1.40736e-06	TRUE	UP
TC1100000383.mm.2	Pank3	0.611576	1.7945e-05	1.42632e-06	TRUE	UP
TC0800003031.mm.2	Cotl1	0.734293	1.82759e-05	1.45344e-06	TRUE	UP
TC0500003000.mm.2	Ulk1	1.29393	1.97142e-05	1.57322e-06	TRUE	UP
TC1200001302.mm.2	Esyt2	0.583279	1.99962e-05	1.60017e-06	TRUE	UP
TC0700000439.mm.2	Cyp2a4	1.87598	2.08584e-05	1.67198e-06	TRUE	UP
TC0X00002826.mm.2	Taf9b	0.580054	2.10735e-05	1.69017e-06	TRUE	UP
TC0X00002447.mm.2	Flna	0.987772	2.15578e-05	1.73193e-06	TRUE	UP
TC0100002969.mm.2	Insig2	1.86373	2.17789e-05	1.75263e-06	TRUE	UP
TC0900002212.mm.2	Tagln	0.971395	2.18931e-05	1.76379e-06	TRUE	UP
TC1600002177.mm.2	Dexi	0.917826	2.20367e-05	1.77734e-06	TRUE	UP
TC0500001572.mm.2	Abhd11	0.658587	2.30603e-05	1.87028e-06	TRUE	UP
TC1400002106.mm.2	Sdr39u1	0.650598	2.30809e-05	1.87404e-06	TRUE	UP
TC0200002532.mm.2	Ube2c	1.38315	2.33034e-05	1.8963e-06	TRUE	UP
TC0800001244.mm.2	Pla2g15	0.76471	2.34208e-05	1.90902e-06	TRUE	UP
TC0100003804.mm.2	Atf3	0.949601	2.3598e-05	1.92665e-06	TRUE	UP
TC1100003687.mm.2	Med24	0.750109	2.45235e-05	2.00773e-06	TRUE	UP
TC1000000834.mm.2	Cnn2	0.682065	2.49991e-05	2.0504e-06	TRUE	UP
TC1100003932.mm.2	Pecam1	0.725851	2.50278e-05	2.05466e-06	TRUE	UP
TC0400001603.mm.2	Wasf2	0.690634	2.56563e-05	2.11087e-06	TRUE	UP
TC0800001207.mm.2	D230025D16Rik	1.00328	2.60059e-05	2.14432e-06	TRUE	UP
TC1300000240.mm.2	Hist1h2ad; Hist1h3b; Hist1h3d	0.821703	2.66311e-05	2.20187e-06	TRUE	UP
TC1900000226.mm.2	Ms4a4d	0.80625	2.67982e-05	2.21689e-06	TRUE	UP
TC1000000508.mm.2	Fabp7	1.14973	2.68293e-05	2.22067e-06	TRUE	UP
TC1500001300.mm.2	Fam105a	0.851178	2.73267e-05	2.269e-06	TRUE	UP
TC0100003233.mm.2	Pla2g4a	0.931232	2.85284e-05	2.38315e-06	TRUE	UP
TC1900001355.mm.2	Gldc	1.07768	2.90577e-05	2.42867e-06	TRUE	UP
TC0700001630.mm.2	Adm	0.946558	2.90584e-05	2.43004e-06	TRUE	UP
TC0700000583.mm.2	Fam187b	0.83462	2.9257e-05	2.44797e-06	TRUE	UP
TC0100001590.mm.2	Arhgap30	0.835616	2.98021e-05	2.49492e-06	TRUE	UP
TC1200000089.mm.2	Smc6	0.604457	3.0559e-05	2.5659e-06	TRUE	UP
TC1200000865.mm.2	Cipc	0.669094	3.0559e-05	2.56654e-06	TRUE	UP
TC0200001849.mm.2	Slc28a2	0.636775	3.12157e-05	2.62872e-06	TRUE	UP
TC0200004959.mm.2	Ncoa6	0.591033	3.18299e-05	2.68331e-06	TRUE	UP
TC1100004054.mm.2	AF251705	0.753551	3.27824e-05	2.77247e-06	TRUE	UP
TC0400002603.mm.2	Coro2a	0.847337	3.28267e-05	2.77769e-06	TRUE	UP
TC0700003013.mm.2	Fgf21	2.34464	3.35058e-05	2.83968e-06	TRUE	UP
TC0900001722.mm.2	Birc3	0.76817	3.42873e-05	2.90746e-06	TRUE	UP
TC0900000032.mm.2	Casp4	0.771268	3.594e-05	3.05569e-06	TRUE	UP
TC0300002114.mm.2	Rarres1	1.05857	3.60952e-05	3.07051e-06	TRUE	UP
TC0800000526.mm.2	Lrp2bp	1.2412	3.67028e-05	3.12386e-06	TRUE	UP
TC0500002480.mm.2	Tlr1	1.20342	3.68057e-05	3.13427e-06	TRUE	UP
TC0500002046.mm.2	AI506816	0.830326	3.69343e-05	3.14688e-06	TRUE	UP
TC0700002414.mm.2	Sepw1	0.595163	3.72515e-05	3.17559e-06	TRUE	UP
TC1700001714.mm.2	Bak1	0.864348	3.90039e-05	3.33551e-06	TRUE	UP
TC1100002249.mm.2	Plek	1.03917	3.91963e-05	3.3555e-06	TRUE	UP
TC0200000969.mm.2	B3galt1	1.9115	3.94452e-05	3.38035e-06	TRUE	UP
TC0500003026.mm.2	Crybb3	0.914891	3.99449e-05	3.42678e-06	TRUE	UP
TC1100003920.mm.2	Cd79b	1.00542	4.02726e-05	3.45852e-06	TRUE	UP
TC0700004652.mm.2	Snrpn; Snurf	0.664565	4.06515e-05	3.49289e-06	TRUE	UP
TC1000003214.mm.2	Lilrb4a	1.05167	4.07111e-05	3.49984e-06	TRUE	UP
TC1400002103.mm.2	Ripk3	0.807428	4.18017e-05	3.59925e-06	TRUE	UP
TC1400002454.mm.2	Lacc1	1.17388	4.21137e-05	3.6318e-06	TRUE	UP
TC0500002700.mm.2	Sult1e1	2.08118	4.25583e-05	3.67398e-06	TRUE	UP
TC0900002514.mm.2	Plekho2	0.769221	4.28154e-05	3.6981e-06	TRUE	UP
TC0600000564.mm.2	Gimap8	0.689511	4.2844e-05	3.70249e-06	TRUE	UP
TC1600001824.mm.2	Nsun3	0.728279	4.2948e-05	3.71535e-06	TRUE	UP
TC1600001605.mm.2	Adprh	0.636268	4.32257e-05	3.74327e-06	TRUE	UP
TC1600000553.mm.2	Cd80	0.950362	4.51294e-05	3.92032e-06	TRUE	UP
TC1300002468.mm.2	Sv2c	0.752717	4.51781e-05	3.92751e-06	TRUE	UP
TC0500003632.mm.2	Slc46a3	0.960272	4.5734e-05	3.98314e-06	TRUE	UP
TC0700000424.mm.2	Tgfb1	0.750453	4.62526e-05	4.03247e-06	TRUE	UP
TC0100000490.mm.2	Icos	0.797482	4.759e-05	4.15978e-06	TRUE	UP
TC0500001349.mm.2	Oas1b	0.704293	4.82344e-05	4.2248e-06	TRUE	UP
TC0X00001859.mm.2	Med14	0.626975	4.87132e-05	4.2799e-06	TRUE	UP
TC0200003215.mm.2	Vav2	0.625888	5.1018e-05	4.50322e-06	TRUE	UP
TC1600001944.mm.2	D16Ertd472e	0.691558	5.1018e-05	4.50537e-06	TRUE	UP
TC1400001070.mm.2	Tsc22d1	1.62489	5.33924e-05	4.72467e-06	TRUE	UP
TC0300002500.mm.2	Hist2h3c2	0.957409	5.39054e-05	4.78221e-06	TRUE	UP
TC0300003216.mm.2	Hist2h3c1	0.957409	5.39054e-05	4.78221e-06	TRUE	UP
TC0500002325.mm.2	Tapt1	0.737772	5.40738e-05	4.79958e-06	TRUE	UP
TC1000002510.mm.2	Mob3a	0.744746	5.40819e-05	4.80273e-06	TRUE	UP
TC1200001282.mm.2	Crip1	0.665072	5.43874e-05	4.83231e-06	TRUE	UP
TC0900000100.mm.2	Sesn3	0.58058	5.47166e-05	4.86402e-06	TRUE	UP
TC0X00002994.mm.2	Btk	0.801721	5.6051e-05	4.99277e-06	TRUE	UP
TC1500000555.mm.2	Ly6f	0.645652	5.8398e-05	5.21758e-06	TRUE	UP
TC0100003627.mm.2	Akt3	0.691214	5.86203e-05	5.24008e-06	TRUE	UP
TC1300000514.mm.2	Jarid2	0.818261	5.86757e-05	5.24768e-06	TRUE	UP
TC1100000638.mm.2	Gpx3	1.05228	6.07699e-05	5.44592e-06	TRUE	UP
TC0800001118.mm.2	Ccl22	0.626721	6.17168e-05	5.53633e-06	TRUE	UP
TC0700002789.mm.2	Fxyd3	1.12139	6.34089e-05	5.71097e-06	TRUE	UP
TC0200000417.mm.2	Abca2	0.712065	6.41388e-05	5.78826e-06	TRUE	UP
TC1500001809.mm.2	Apol9a	0.984022	6.43519e-05	5.8104e-06	TRUE	UP
TC0300000210.mm.2	Skil	0.73087	6.4898e-05	5.86539e-06	TRUE	UP
TC0500002893.mm.2	Abcg3	0.78212	6.9668e-05	6.30921e-06	TRUE	UP
TC0700002779.mm.2	Cd22	0.908514	7.16293e-05	6.49974e-06	TRUE	UP
TC1700002346.mm.2	Slc25a23	0.757355	7.43004e-05	6.75549e-06	TRUE	UP
TC0900001115.mm.2	Rwdd2a	1.04158	7.45463e-05	6.78121e-06	TRUE	UP
TC1100003640.mm.2	Kpnb1	0.611232	7.5265e-05	6.84997e-06	TRUE	UP
TC0700004516.mm.2	Ifitm6	0.744293	7.85072e-05	7.1698e-06	TRUE	UP
TC1600000500.mm.2	Parp9	0.666522	7.85952e-05	7.18137e-06	TRUE	UP
TC1300001558.mm.2	Hist1h2ak	1.12056	7.95538e-05	7.27971e-06	TRUE	UP
TC1400002059.mm.2	Ajuba	0.880344	8.00165e-05	7.32566e-06	TRUE	UP
TC0300002802.mm.2	Vcam1	1.20178	8.00748e-05	7.3346e-06	TRUE	UP
TC0200003473.mm.2	Zeb2; Mir5129	0.744149	8.01088e-05	7.34132e-06	TRUE	UP
TC1500000649.mm.2	Cyth4	0.805326	8.25023e-05	7.56809e-06	TRUE	UP
TC0X00001955.mm.2	Klhl13	0.603098	8.51463e-05	7.82597e-06	TRUE	UP
TC0100003506.mm.2	Ddr2	0.701322	8.54293e-05	7.85584e-06	TRUE	UP
TC0200002301.mm.2	Tpx2	0.920851	8.73403e-05	8.05909e-06	TRUE	UP
TC0400001039.mm.2	Lepr	0.894855	8.74545e-05	8.07357e-06	TRUE	UP
TC0400003000.mm.2	Hacd4	0.845127	8.76342e-05	8.09805e-06	TRUE	UP
TC1700000474.mm.2	Ppard; 1810013A23Rik	0.98029	8.97034e-05	8.3135e-06	TRUE	UP
TC0900001675.mm.2	Ccr5	0.882029	9.44551e-05	8.7794e-06	TRUE	UP
TC1300000148.mm.2	Elmo1	0.784692	9.519e-05	8.85628e-06	TRUE	UP
TC0X00003236.mm.2	Sat1	0.838062	9.5668e-05	8.91368e-06	TRUE	UP
TC1200001110.mm.2	Evl	0.650145	9.5673e-05	8.91845e-06	TRUE	UP
TC1300001634.mm.2	Hist1h2ae	0.871812	9.60748e-05	8.96023e-06	TRUE	UP
TC1700002224.mm.2	A530064D06Rik	0.653623	9.64078e-05	8.99997e-06	TRUE	UP
TC0700004277.mm.2	Cd19	0.823134	9.66546e-05	9.02737e-06	TRUE	UP
TC0200002228.mm.2	Pygb	0.825036	9.71225e-05	9.07981e-06	TRUE	UP
TC0500002266.mm.2	Man2b2	0.686793	9.84115e-05	9.22248e-06	TRUE	UP
TC1600001337.mm.2	Klhl6	0.646576	9.88551e-05	9.27295e-06	TRUE	UP
TC1300002717.mm.2	Itga1; Pelo	0.665797	9.90077e-05	9.29347e-06	TRUE	UP
TC1100002754.mm.2	Slc22a4	0.583514	9.90077e-05	9.29618e-06	TRUE	UP
TC0100001175.mm.2	Pm20d1	0.998225	9.90295e-05	9.30269e-06	TRUE	UP
TC0400002392.mm.2	Zfp292	0.873406	9.98295e-05	9.38683e-06	TRUE	UP
TC1000000847.mm.2	Ndufs7	0.627917	0.000100796	9.49134e-06	TRUE	UP
TC0700000399.mm.2	Gm9844	0.932862	0.000103897	9.80205e-06	TRUE	UP
TC0500003178.mm.2	Oas1c	0.685181	0.00010617	1.00451e-05	TRUE	UP
TC1100003285.mm.2	Traf4	0.734801	0.000106585	1.00941e-05	TRUE	UP
TC1900001762.mm.2	Csf2ra	0.778804	0.000108093	1.02418e-05	TRUE	UP
TC0700003909.mm.2	Hbb-bs; Hbb-b1	1.49018	0.000112747	1.07233e-05	TRUE	UP
TC0700003764.mm.2	Thrsp	2.13178	0.000114923	1.09458e-05	TRUE	UP
TC1500000662.mm.2	H1f0	0.595797	0.000115662	1.10266e-05	TRUE	UP
TC0500002528.mm.2	Atp8a1	0.670688	0.000115663	1.10371e-05	TRUE	UP
TC0600001709.mm.2	Lrmp	0.618714	0.000116494	1.11216e-05	TRUE	UP
TC0400002251.mm.2	Ripk2	0.926051	0.000116735	1.11604e-05	TRUE	UP
TC1300001576.mm.2	Hist1h2ag	0.795272	0.000116954	1.11919e-05	TRUE	UP
TC0300000732.mm.2	Arhgef2	0.814257	0.000116998	1.12014e-05	TRUE	UP
TC0700000028.mm.2	Lilra5	0.759004	0.000117431	1.12481e-05	TRUE	UP
TC0100001604.mm.2	Slamf6	0.92712	0.000119073	1.14429e-05	TRUE	UP
TC0900000193.mm.2	Slc44a2	0.759402	0.000120575	1.16362e-05	TRUE	UP
TC1000001995.mm.2	Dse	0.610761	0.000121043	1.16922e-05	TRUE	UP
TC1100001848.mm.2	Kcnj16	0.852428	0.000122192	1.18142e-05	TRUE	UP
TC1300000245.mm.2	Hist1h2af	0.859855	0.000124415	1.20516e-05	TRUE	UP
TC1200000647.mm.2	Prkch	0.638623	0.00012453	1.20683e-05	TRUE	UP
TC1100003146.mm.2	Spns2	1.1929	0.000129168	1.25527e-05	TRUE	UP
TC0600002504.mm.2	Tmsb10	0.967591	0.000129216	1.25632e-05	TRUE	UP
TC0100003877.mm.2	Kdelc1	0.864076	0.000129665	1.26185e-05	TRUE	UP
TC0X00000801.mm.2	Tmem47	0.836322	0.000132854	1.29528e-05	TRUE	UP
TC0X00000213.mm.2	Cdk16	0.603007	0.000133703	1.30416e-05	TRUE	UP
TC0300000934.mm.2	Hist2h3b	0.872264	0.000134391	1.31147e-05	TRUE	UP
TC0500003090.mm.2	Mlec	0.763732	0.000138986	1.36132e-05	TRUE	UP
TC1600001089.mm.2	Bace2	0.71221	0.000142886	1.40145e-05	TRUE	UP
TC0200002018.mm.2	Smox	0.700761	0.00014456	1.42177e-05	TRUE	UP
TC1000003019.mm.2	Irak3	1.66717	0.000144592	1.42284e-05	TRUE	UP
TC1000001704.mm.2	Tab2	0.698551	0.000144592	1.42339e-05	TRUE	UP
TC0800002617.mm.2	Dnaja2	0.715127	0.000147392	1.45228e-05	TRUE	UP
TC0X00001084.mm.2	A630033H20Rik	0.91779	0.000148731	1.46682e-05	TRUE	UP
TC0300001081.mm.2	Rhoc	0.777228	0.000152618	1.50859e-05	TRUE	UP
TC0900000008.mm.2	Gm10715	1.71409	0.000152896	1.51203e-05	TRUE	UP
TC0500000054.mm.2	Abcb4	0.623696	0.000153369	1.51808e-05	TRUE	UP
TC1100003110.mm.2	Camta2	0.70962	0.000154183	1.52683e-05	TRUE	UP
TC0700003778.mm.2	Tsku	2.43966	0.000159618	1.58641e-05	TRUE	UP
TC0100003549.mm.2	Ly9	0.591612	0.000161605	1.60906e-05	TRUE	UP
TC1700002179.mm.2	Srf	0.645054	0.000163188	1.6285e-05	TRUE	UP
TC0800003068.mm.2	Cyba	0.852482	0.000166615	1.66495e-05	TRUE	UP
TC0500003169.mm.2	Tpcn1	0.654076	0.000167151	1.67106e-05	TRUE	UP
TC1300002119.mm.2	Golm1	0.768605	0.00016972	1.69951e-05	TRUE	UP
TC1600000674.mm.2	Btla	1.01025	0.000170018	1.70355e-05	TRUE	UP
TC0400003888.mm.2	Plekhm2	0.692844	0.000171699	1.72349e-05	TRUE	UP
TC0600001508.mm.2	Foxm1; 4933413G19Rik	0.865	0.000172151	1.7288e-05	TRUE	UP
TC1500002032.mm.2	Ttll8	0.834185	0.000172614	1.735e-05	TRUE	UP
TC0700004624.mm.2	Plk1	1.23821	0.000177111	1.78339e-05	TRUE	UP
TC1000001596.mm.2	Stat2	0.771739	0.000178544	1.80095e-05	TRUE	UP
TC1100000822.mm.2	Pmp22	0.750344	0.000181841	1.84003e-05	TRUE	UP
TC1000002211.mm.2	Oit3	0.665634	0.000184134	1.8682e-05	TRUE	UP
TC1500000647.mm.2	Kctd17	0.643913	0.000187158	1.90141e-05	TRUE	UP
TC1400000513.mm.2	Lgals3	0.831703	0.000190155	1.93443e-05	TRUE	UP
TC1700000036.mm.2	Zdhhc14	0.61817	0.000191111	1.94501e-05	TRUE	UP
TC0700003548.mm.2	Det1	0.661612	0.000191192	1.9467e-05	TRUE	UP
TC1600001373.mm.2	Tmem41a	0.791196	0.000191397	1.94965e-05	TRUE	UP
TC0100001382.mm.2	Rnasel	0.611359	0.00019235	1.96196e-05	TRUE	UP
TC1900000990.mm.2	Dpf2	0.595815	0.0001931	1.97048e-05	TRUE	UP
TC0600002323.mm.2	Nod1	0.64846	0.000195547	2.00073e-05	TRUE	UP
TC1600001827.mm.2	Epha3	0.607971	0.000196412	2.01135e-05	TRUE	UP
TC0300000753.mm.2	Muc1	0.814239	0.000197019	2.01934e-05	TRUE	UP
TC1000001549.mm.2	Agap2	0.675906	0.000199219	2.04548e-05	TRUE	UP
TC0100002461.mm.2	Klf7	0.585308	0.000204366	2.102e-05	TRUE	UP
TC0600001368.mm.2	Tuba8	0.942319	0.000204798	2.10738e-05	TRUE	UP
TC1100000887.mm.2	Slc25a35	0.601286	0.000205685	2.11835e-05	TRUE	UP
TC1500001730.mm.2	Ly6c2	1.49643	0.000206032	2.12285e-05	TRUE	UP
TC0700004451.mm.2	Mki67	1.15391	0.000207488	2.14128e-05	TRUE	UP
TC1900000508.mm.2	Kif20b	0.93904	0.000207488	2.1416e-05	TRUE	UP
TC0300002229.mm.2	Lrat	0.681993	0.000209272	2.16284e-05	TRUE	UP
TC0300002467.mm.2	Tnfaip8l2	0.605344	0.000211032	2.18387e-05	TRUE	UP
TC0100003797.mm.2	Mfsd7b	0.649366	0.000212603	2.20109e-05	TRUE	UP
TC0300000935.mm.2	Hist2h2bb	0.745924	0.000217191	2.25544e-05	TRUE	UP
TC0700004002.mm.2	Gvin1	1.15384	0.000218671	2.27474e-05	TRUE	UP
TC0300000172.mm.2	Tnik	0.581703	0.000220946	2.29941e-05	TRUE	UP
TC0900000006.mm.2	Gm10717	1.37076	0.000223605	2.3311e-05	TRUE	UP
TC0400004047.mm.2	Pik3cd	0.75221	0.000227108	2.37172e-05	TRUE	UP
TC1400000575.mm.2	Pnp2	0.723569	0.00022971	2.40303e-05	TRUE	UP
TC1100000336.mm.2	Hba-a2; Hba-a1	1.24149	0.000240044	2.52087e-05	TRUE	UP
TC0900001905.mm.2	Zfp810	0.663134	0.000245671	2.58438e-05	TRUE	UP
TC0600002056.mm.2	Wdr91	0.889058	0.000246543	2.59467e-05	TRUE	UP
TC0200005438.mm.2	Helz2	0.687446	0.000246785	2.59943e-05	TRUE	UP
TC0200000240.mm.2	Vim	0.962899	0.000247134	2.60422e-05	TRUE	UP
TC1200001625.mm.2	Hdac9	0.592591	0.000249663	2.632e-05	TRUE	UP
TC1400000976.mm.2	Loxl2; Mir6950	0.642572	0.000253293	2.6714e-05	TRUE	UP
TC1100003990.mm.2	Slc16a6	0.985598	0.000253969	2.68083e-05	TRUE	UP
TC1100002176.mm.2	Myo1g	0.750308	0.000255794	2.7047e-05	TRUE	UP
TC0400004034.mm.2	Pgd	0.837228	0.000256209	2.71023e-05	TRUE	UP
TC1700001969.mm.2	Tcf19	0.832935	0.000256249	2.71181e-05	TRUE	UP
TC1100000339.mm.2	Hba-a1; Hba-a2	1.18826	0.000256643	2.71829e-05	TRUE	UP
TC1500001167.mm.2	Osmr	0.59221	0.000259315	2.7501e-05	TRUE	UP
TC1700002558.mm.2	Eif2ak2	0.707953	0.000263558	2.80103e-05	TRUE	UP
TC1100000802.mm.2	Trpv2	0.635471	0.000269735	2.8764e-05	TRUE	UP
TC0300000852.mm.2	S100a11	1.00643	0.000270252	2.88312e-05	TRUE	UP
TC0500001573.mm.2	Stx1a	0.665018	0.000272025	2.90412e-05	TRUE	UP
TC1000000730.mm.2	Vpreb3	0.667935	0.000272644	2.91233e-05	TRUE	UP
TC0700003908.mm.2	Hbb-bt; Hbb-b2	1.35966	0.000275011	2.93885e-05	TRUE	UP
TC0100003301.mm.2	Mr1	0.748841	0.000278144	2.97734e-05	TRUE	UP
TC1300001649.mm.2	Slc17a4	0.949801	0.000285905	3.06942e-05	TRUE	UP
TC0700001800.mm.2	Sbk1	0.626413	0.000286707	3.08062e-05	TRUE	UP
TC0800001204.mm.2	Cbfb	0.593225	0.000290112	3.12113e-05	TRUE	UP
TC0500000580.mm.2	G6pd2	0.859783	0.00029353	3.16186e-05	TRUE	UP
TC0600003364.mm.2	Slco1a4	1.26366	0.000295311	3.18504e-05	TRUE	UP
TC1100001708.mm.2	Fmnl1	0.701449	0.000296011	3.19525e-05	TRUE	UP
TC0800002542.mm.2	Il15	0.972174	0.000297195	3.20937e-05	TRUE	UP
TC0X00001653.mm.2	Ctps2	0.685	0.000298986	3.23141e-05	TRUE	UP
TC0300000500.mm.2	Mme	0.947591	0.000300876	3.25454e-05	TRUE	UP
TC0300001444.mm.2	Gbp2b; Gbp5	0.670417	0.000304573	3.29865e-05	TRUE	UP
TC0900000002.mm.2	Gm11168	1.26609	0.000307882	3.34419e-05	TRUE	UP
TC1700002287.mm.2	Sult1c2	0.989692	0.000310076	3.36942e-05	TRUE	UP
TC0700000239.mm.2	Prkd2	0.695942	0.000313352	3.40925e-05	TRUE	UP
TC0900002149.mm.2	Cbl	0.582011	0.000319247	3.48345e-05	TRUE	UP
TC1300002534.mm.2	Naip1	0.590797	0.000319685	3.48967e-05	TRUE	UP
TC0900000007.mm.2	Gm17535	1.43957	0.000325556	3.55816e-05	TRUE	UP
TC1100003966.mm.2	Prkca	0.719384	0.000331781	3.64114e-05	TRUE	UP
TC0800001078.mm.2	Lpcat2	0.862409	0.000336287	3.69403e-05	TRUE	UP
TC1300001574.mm.2	Hist1h2ah	0.760163	0.000336287	3.69513e-05	TRUE	UP
TC1700001105.mm.2	Epb41l3	0.746051	0.000338554	3.72461e-05	TRUE	UP
TC0400001325.mm.2	Slc2a1	0.611576	0.000345122	3.80309e-05	TRUE	UP
TC1100002096.mm.2	Tug1	0.590254	0.000353347	3.90008e-05	TRUE	UP
TC0200005429.mm.2	Chrna4	2.30656	0.000354912	3.91896e-05	TRUE	UP
TC0100001173.mm.2	Rab7b	0.761649	0.000357915	3.95936e-05	TRUE	UP
TC0600002044.mm.2	Slc35b4	0.626721	0.000360554	3.99263e-05	TRUE	UP
TC0600002802.mm.2	Frmd4b	0.901884	0.000363947	4.03675e-05	TRUE	UP
TC0400002578.mm.2	Slc25a51	0.831685	0.000369652	4.10503e-05	TRUE	UP
TC1700000600.mm.2	Daxx	0.597899	0.000375232	4.17206e-05	TRUE	UP
TC0100000765.mm.2	Sp140	0.674185	0.000376061	4.18297e-05	TRUE	UP
TC0X00003400.mm.2	Gm6377	0.808696	0.000390286	4.35878e-05	TRUE	UP
TC0100001631.mm.2	Aim2	0.684656	0.000395326	4.41862e-05	TRUE	UP
TC1100000494.mm.2	Trim7	0.645652	0.000398131	4.45893e-05	TRUE	UP
TC0200005281.mm.2	Bmp7	0.727319	0.000401584	4.50072e-05	TRUE	UP
TC1400000940.mm.2	Pbk	0.791467	0.000401584	4.50123e-05	TRUE	UP
TC1000002256.mm.2	Hk1	0.644275	0.000403571	4.52714e-05	TRUE	UP
TC1100003781.mm.2	Rab5c	0.623786	0.000410318	4.61206e-05	TRUE	UP
TC1300002532.mm.2	Naip6; Naip7	0.646341	0.000411024	4.6237e-05	TRUE	UP
TC0100002690.mm.2	Pid1	0.676486	0.00041313	4.65111e-05	TRUE	UP
TC0700004201.mm.2	Cdr2	0.592192	0.000413503	4.65717e-05	TRUE	UP
TC1600000988.mm.2	Mrap	0.92404	0.000414056	4.66526e-05	TRUE	UP
TC1100004127.mm.2	Jmjd6	0.66913	0.000424576	4.80098e-05	TRUE	UP
TC1000001518.mm.2	Fam19a2	0.738062	0.000435986	4.94376e-05	TRUE	UP
TC1500002246.mm.2	Smagp	1.08025	0.000463875	5.29343e-05	TRUE	UP
TC0800001410.mm.2	Hsd17b2	0.616938	0.000483155	5.54608e-05	TRUE	UP
TC1100001242.mm.2	Slfn3	0.717754	0.000494354	5.68798e-05	TRUE	UP
TC0800001182.mm.2	Cmtm3	0.66038	0.00049477	5.695e-05	TRUE	UP
TC0500002843.mm.2	Hpse	0.603062	0.000495611	5.70691e-05	TRUE	UP
TC1300000281.mm.2	D130043K22Rik	0.779257	0.000499714	5.75866e-05	TRUE	UP
TC1900001415.mm.2	Acta2	1.2504	0.000504	5.8194e-05	TRUE	UP
TC0600002579.mm.2	Cd207	0.658931	0.000504125	5.82312e-05	TRUE	UP
TC0200001757.mm.2	Casc5	0.759312	0.000504518	5.82992e-05	TRUE	UP
TC0700003862.mm.2	Trim21	0.586178	0.000505783	5.84682e-05	TRUE	UP
TC1400001524.mm.2	Gng2	0.724366	0.000517303	5.9966e-05	TRUE	UP
TC0600001890.mm.2	Tfec	0.584511	0.000529955	6.17875e-05	TRUE	UP
TC0700003942.mm.2	Trim30c	0.813623	0.00053251	6.21705e-05	TRUE	UP
TC1700002120.mm.2	Cd2ap	0.625616	0.000532925	6.22615e-05	TRUE	UP
TC1000001696.mm.2	Ulbp1	0.685797	0.000536394	6.2804e-05	TRUE	UP
TC1100003787.mm.2	Stat5b	0.610888	0.000549927	6.45866e-05	TRUE	UP
TC1500001833.mm.2	Il2rb	0.713587	0.000553593	6.51353e-05	TRUE	UP
TC1300001285.mm.2	Esm1	0.988442	0.000553593	6.51418e-05	TRUE	UP
TC0600000772.mm.2	Mad2l1	0.787681	0.000562444	6.62846e-05	TRUE	UP
TC0700003998.mm.2	Gm8979; Gm8989	0.661612	0.000576057	6.80186e-05	TRUE	UP
TC0700004007.mm.2	Gm8989	0.661612	0.000576057	6.80186e-05	TRUE	UP
TC1900001622.mm.2	Calhm2	0.605489	0.000597013	7.07619e-05	TRUE	UP
TC0700002053.mm.2	Pnpla2	0.92067	0.000599508	7.10846e-05	TRUE	UP
TC1500001623.mm.2	Fam49b	0.689728	0.000602612	7.14798e-05	TRUE	UP
TC1500000235.mm.2	Laptm4b	0.660562	0.000610964	7.25806e-05	TRUE	UP
TC0600002089.mm.2	Creb3l2	0.866105	0.000611982	7.27291e-05	TRUE	UP
TC1700002152.mm.2	Slc29a1	0.627572	0.000623772	7.42425e-05	TRUE	UP
TC1600002080.mm.2	Tmem50b	0.62712	0.000626721	7.46678e-05	TRUE	UP
TC1200001834.mm.2	Mis18bp1	0.871504	0.000627844	7.48402e-05	TRUE	UP
TC1300000087.mm.2	Nid1	0.66846	0.000634789	7.58397e-05	TRUE	UP
TC0800001903.mm.2	Plekha2	0.627446	0.000671234	8.05566e-05	TRUE	UP
TC0200003303.mm.2	Lcn2	3.85395	0.000698223	8.411e-05	TRUE	UP
TC1300000173.mm.2	Hist1h2ai	0.640145	0.000712382	8.60081e-05	TRUE	UP
TC1200002288.mm.2	Serpina12	0.802482	0.000716525	8.66374e-05	TRUE	UP
TC1300001633.mm.2	Hist1h3e	0.857174	0.000724896	8.76822e-05	TRUE	UP
TC0700004086.mm.2	Tmem41b	0.586576	0.000728148	8.81411e-05	TRUE	UP
TC1400001182.mm.2	Irg1	0.763351	0.000741249	8.98939e-05	TRUE	UP
TC0100002894.mm.2	Bcl2	0.661576	0.000766627	9.35239e-05	TRUE	UP
TC1300000522.mm.2	Mylip	0.631033	0.000771551	9.42289e-05	TRUE	UP
TC1200001686.mm.2	Stxbp6	0.588696	0.000776108	9.49601e-05	TRUE	UP
TC0900002779.mm.2	Pgm3	1.30051	0.000782683	9.58351e-05	TRUE	UP
TC1300000260.mm.2	Hist1h2ab	0.673225	0.000802494	9.85499e-05	TRUE	UP
TC0800000991.mm.2	Gpt2	0.619239	0.000818733	0.000100876	TRUE	UP
TC1800000677.mm.2	Zfp532	0.635145	0.000871626	0.000107864	TRUE	UP
TC0100001602.mm.2	Cd84	0.687627	0.000894496	0.000111094	TRUE	UP
TC1300001561.mm.2	Hist1h3i	0.765199	0.000922301	0.000114966	TRUE	UP
TC0400004199.mm.2	Gm13212	0.802446	0.00094515	0.000117942	TRUE	UP
TC0500000096.mm.2	Pclo	0.624819	0.000946487	0.000118206	TRUE	UP
TC0500003625.mm.2	Urad	0.590888	0.000955967	0.000119507	TRUE	UP
TC0200005475.mm.2	Dusp19	0.637446	0.000960035	0.000120058	TRUE	UP
TC0100000021.mm.2	Rb1cc1	0.585272	0.000968361	0.000121231	TRUE	UP
TC1300001270.mm.2	Plpp1	0.695145	0.000978046	0.000122619	TRUE	UP
TC0900002396.mm.2	Cd276	0.58596	0.000982904	0.000123272	TRUE	UP
TC1300001461.mm.2	Gpr137b	0.597554	0.000989017	0.000124173	TRUE	UP
TC0700004633.mm.2	Gm15448	0.593641	0.00102357	0.000128851	TRUE	UP
TC0300002139.mm.2	B3galnt1	0.652101	0.00102357	0.00012888	TRUE	UP
TC1300000076.mm.2	Gm2399	0.704964	0.00103566	0.000130589	TRUE	UP
TC0900000854.mm.2	2810417H13Rik	0.69375	0.00103678	0.000130776	TRUE	UP
TC1600000264.mm.2	B3gnt5	0.684565	0.00105367	0.000133096	TRUE	UP
TC1400001514.mm.2	Gm21738	1.2435	0.00106108	0.000134176	TRUE	UP
TC0200001741.mm.2	Bub1b	0.913605	0.00109185	0.00013864	TRUE	UP
TC1700000618.mm.2	H2-DMa	0.680507	0.00115318	0.000147173	TRUE	UP
TC1400001724.mm.2	Fam25c	0.724783	0.00115583	0.000147562	TRUE	UP
TC0300002311.mm.2	Slc25a44	0.743659	0.00117848	0.000150773	TRUE	UP
TC0200001502.mm.2	Gm10801	1.26074	0.00119175	0.000152578	TRUE	UP
TC0800000756.mm.2	Isyna1	0.815525	0.00120999	0.00015524	TRUE	UP
TC0700001399.mm.2	Chrdl2	0.63029	0.00123316	0.000158713	TRUE	UP
TC1700001620.mm.2	Tbc1d24; Ntn3	0.664764	0.00123668	0.000159222	TRUE	UP
TC0300000948.mm.2	Hfe2	0.63933	0.00124214	0.00015998	TRUE	UP
TC0200001951.mm.2	Slc20a1	0.960344	0.00124984	0.000161085	TRUE	UP
TC0900001612.mm.2	Ctnnb1; Mir7090	0.606685	0.00125623	0.000162191	TRUE	UP
TC1200001810.mm.2	Clec14a	0.622917	0.00127465	0.000165086	TRUE	UP
TC0300002051.mm.2	P2ry14; F630111L10Rik	0.592101	0.00128802	0.000166933	TRUE	UP
TC0900000004.mm.2	Gm10720	1.17071	0.00128951	0.000167185	TRUE	UP
TC0100003399.mm.2	Fmo4	0.715688	0.00131605	0.000171112	TRUE	UP
TC0700003940.mm.2	Trim12c	0.784076	0.00131605	0.000171171	TRUE	UP
TC0200000603.mm.2	Angptl2	0.590127	0.00133559	0.000174249	TRUE	UP
TC0100003099.mm.2	Prelp	0.587156	0.00134134	0.000175144	TRUE	UP
TC1600001208.mm.2	Txndc11	0.594783	0.00137923	0.000180494	TRUE	UP
TC0600000948.mm.2	Dysf	0.593678	0.00138619	0.00018153	TRUE	UP
TC0700004553.mm.2	Dusp8	0.823551	0.00138667	0.000181654	TRUE	UP
TC0800000707.mm.2	Lpl	0.583297	0.00138944	0.000182143	TRUE	UP
TC1900000529.mm.2	Kif11	0.7225	0.00142216	0.00018688	TRUE	UP
TC1900001493.mm.2	Tctn3	0.695199	0.00143776	0.000189253	TRUE	UP
TC0300000307.mm.2	Hspa4l	1.09437	0.00149337	0.000197516	TRUE	UP
TC0600001203.mm.2	Bhlhe40	1.05911	0.00151649	0.000200915	TRUE	UP
TC1100004242.mm.2	Sectm1a	0.593822	0.00154739	0.000205301	TRUE	UP
TC0200003365.mm.2	Ggta1	0.630217	0.00154739	0.000205357	TRUE	UP
TC0600003370.mm.2	Slco1a5	0.68529	0.00157858	0.000209994	TRUE	UP
TC0X00001276.mm.2	Cenpi	0.672446	0.00157931	0.000210163	TRUE	UP
TC1700000564.mm.2	Cyp4f16	0.743152	0.00158442	0.000210913	TRUE	UP
TC0100000343.mm.2	Col3a1	0.97663	0.00161736	0.000215905	TRUE	UP
TC1900000186.mm.2	Fads3	0.582464	0.0016311	0.000218068	TRUE	UP
TC0200005015.mm.2	Rbl1	0.789203	0.00167083	0.000224297	TRUE	UP
TC0500001773.mm.2	Cyp3a57	0.756322	0.00173511	0.00023449	TRUE	UP
TC1700002434.mm.2	Rab12	0.639601	0.00175807	0.000238146	TRUE	UP
TC0100002503.mm.2	Erbb4	0.932301	0.00176326	0.000238928	TRUE	UP
TC1000001551.mm.2	B4galnt1	0.694529	0.00178042	0.000241495	TRUE	UP
TC0500000050.mm.2	Abcb1a	0.999022	0.00183273	0.000249249	TRUE	UP
TC0700003996.mm.2	Gm4070; Gvin1; Gm17757; Gm18853	0.79337	0.00183639	0.000249875	TRUE	UP
TC0800000368.mm.2	Rnf122	0.696105	0.00188081	0.000256731	TRUE	UP
TC0200003672.mm.2	Ttc21b	0.68587	0.00189288	0.000258795	TRUE	UP
TC1700001033.mm.2	Vav1	0.690725	0.00192168	0.000263425	TRUE	UP
TC0600003114.mm.2	Ptpn6	0.586377	0.0019979	0.000275492	TRUE	UP
TC1200001861.mm.2	Pole2	0.684783	0.00201604	0.000278538	TRUE	UP
TC1600001919.mm.2	Samsn1	0.759583	0.00206028	0.0002853	TRUE	UP
TC0200004599.mm.2	Il1a	0.611848	0.00207652	0.000288257	TRUE	UP
TC0900000189.mm.2	Pde4a	0.659293	0.0020826	0.000289329	TRUE	UP
TC0400003379.mm.2	Atp6v0b	0.660181	0.00209479	0.000291773	TRUE	UP
TC0900002593.mm.2	Ccnb2	0.9325	0.00209755	0.00029235	TRUE	UP
TC0100003795.mm.2	Rps6kc1	0.66058	0.00211952	0.000295603	TRUE	UP
TC1500001940.mm.2	Cenpm	0.697681	0.00212081	0.000295879	TRUE	UP
TC0X00002834.mm.2	Cysltr1	0.688188	0.00212721	0.000297315	TRUE	UP
TC1200001031.mm.2	Ppp4r4	0.674746	0.00212721	0.000297346	TRUE	UP
TC0200000383.mm.2	Psd4	0.620181	0.00220141	0.000309403	TRUE	UP
TC0700004638.mm.2	Rab4b; Mir3101	0.731232	0.00227083	0.00032008	TRUE	UP
TC1900001461.mm.2	Myof	0.582355	0.00232114	0.000328634	TRUE	UP
TC0600003537.mm.2	Clec9a	0.778297	0.00233957	0.000331349	TRUE	UP
TC1900000309.mm.2	Gna14	0.607772	0.00236442	0.00033504	TRUE	UP
TC0400000696.mm.2	Slc31a2	0.62279	0.00239804	0.000340386	TRUE	UP
TC1000001625.mm.2	Cd63	0.590163	0.00247552	0.000353391	TRUE	UP
TC0500002481.mm.2	Tlr6	0.667953	0.00251438	0.000360064	TRUE	UP
TC1200002242.mm.2	Fbln5	0.702355	0.00251806	0.000360824	TRUE	UP
TC0300001760.mm.2	Fndc3b	0.685507	0.00252487	0.000361914	TRUE	UP
TC1000001894.mm.2	Enpp1	0.584402	0.00256214	0.000367717	TRUE	UP
TC1400000072.mm.2	Abhd6	0.780362	0.00263111	0.000379393	TRUE	UP
TC0X00001658.mm.2	Ap1s2	0.580272	0.00266253	0.000384597	TRUE	UP
TC0100000524.mm.2	Adam23	0.6625	0.00268563	0.000388222	TRUE	UP
TC0800002431.mm.2	Bst2	0.988913	0.00277664	0.000403254	TRUE	UP
TC1000002008.mm.2	Marcks	0.601268	0.00279225	0.000405774	TRUE	UP
TC1600001304.mm.2	Prodh	0.764022	0.002912	0.000425535	TRUE	UP
TC0700000005.mm.2	Myadm	0.629873	0.00296655	0.000434709	TRUE	UP
TC0800001617.mm.2	Clec4g	0.605254	0.00303521	0.000446684	TRUE	UP
TC0600003605.mm.2	Klrb1c	0.596214	0.00317368	0.000471493	TRUE	UP
TC1600001553.mm.2	Dirc2	0.618605	0.00317525	0.000472012	TRUE	UP
TC0600002067.mm.2	Fam180a	0.757391	0.00328583	0.00048993	TRUE	UP
TC0300001856.mm.2	Ccna2	0.672138	0.00328877	0.000490516	TRUE	UP
TC1300000028.mm.2	Klf6	0.779837	0.00335006	0.000500606	TRUE	UP
TC1300000181.mm.2	Hist1h2ao; Hist1h2ap; Hist1h2ai; Hist1h2ah	0.63404	0.00335006	0.000500714	TRUE	UP
TC1300001565.mm.2	Hist1h2ap	0.63404	0.00335006	0.000500714	TRUE	UP
TC1200001938.mm.2	Wdr89; Rplp2-ps1	0.615525	0.00347356	0.000520894	TRUE	UP
TC0800000846.mm.2	Mcm5	0.672572	0.00360735	0.00054323	TRUE	UP
TC0700001151.mm.2	Prc1	0.682373	0.00363834	0.000548617	TRUE	UP
TC1200001028.mm.2	Otub2	0.651866	0.00367583	0.000555529	TRUE	UP
TC1200000279.mm.2	Nampt	0.953496	0.00369354	0.000558872	TRUE	UP
TC1100002301.mm.2	Slc1a4	0.70067	0.0037302	0.000565931	TRUE	UP
TC1500001144.mm.2	Fbxo4	0.603152	0.00392748	0.00060152	TRUE	UP
TC0900003300.mm.2	Cdcp1	0.610217	0.00400647	0.000615603	TRUE	UP
TC0X00000313.mm.2	Dock11	0.714855	0.00402008	0.000618418	TRUE	UP
TC0700002372.mm.2	Sult2a1	0.583678	0.00412962	0.000637872	TRUE	UP
TC0500001399.mm.2	P2rx7	0.678714	0.0042988	0.000666908	TRUE	UP
TC0400000705.mm.2	Rgs3	0.71	0.00435728	0.000679316	TRUE	UP
TC0500002833.mm.2	Sec31a	0.592899	0.00436172	0.000680597	TRUE	UP
TC0200004537.mm.2	Atp8b4	0.603859	0.00438124	0.00068384	TRUE	UP
TC0900000001.mm.2	Gm10718; Gm10722	0.835924	0.00445281	0.000696616	TRUE	UP
TC1000001044.mm.2	Timp3	0.809946	0.004552	0.00071439	TRUE	UP
TC1100003771.mm.2	Nt5c3b	0.710652	0.00455881	0.000715868	TRUE	UP
TC0300001757.mm.2	Ect2	0.675435	0.00470717	0.000743828	TRUE	UP
TC1500002217.mm.2	Racgap1	0.665616	0.00496209	0.000790369	TRUE	UP
TC0100001597.mm.2	Cd48	0.587264	0.00502821	0.000801806	TRUE	UP
TC1400001039.mm.2	Gm21750	0.649964	0.005056	0.00080692	TRUE	UP
TC0800002115.mm.2	Fgl1	0.960634	0.00516293	0.000825846	TRUE	UP
TC0900000005.mm.2	Gm10719	0.968659	0.00519186	0.000831175	TRUE	UP
TC0500000052.mm.2	Abcb1b	0.613514	0.00522806	0.000838147	TRUE	UP
TC0600003334.mm.2	Art4	0.673696	0.00543685	0.000877005	TRUE	UP
TC0400002531.mm.2	Gba2	0.669529	0.00552639	0.000893191	TRUE	UP
TC1300000266.mm.2	Slc17a3	0.64625	0.00559521	0.00090759	TRUE	UP
TC1900001422.mm.2	Ifit1bl1	0.58913	0.00612009	0.00100403	TRUE	UP
TC1000003213.mm.2	Lilr4b	0.819982	0.00615956	0.00101134	TRUE	UP
TC0700003552.mm.2	Mfge8	0.64558	0.00620708	0.00102067	TRUE	UP
TC1300000246.mm.2	Hist1h3g	0.603496	0.00646502	0.00107052	TRUE	UP
TC1600000930.mm.2	Gm21833	0.6475	0.00646569	0.00107092	TRUE	UP
TC1300000174.mm.2	Hist1h3h	0.674257	0.00665973	0.00110636	TRUE	UP
TC1500002142.mm.2	Slc38a2	0.82692	0.00689029	0.00115024	TRUE	UP
TC0700000810.mm.2	Napsa	0.63846	0.00708049	0.00118486	TRUE	UP
TC1600001092.mm.2	Mx2	0.740815	0.00708251	0.00118602	TRUE	UP
TC0900001674.mm.2	Ccr2	0.803188	0.00717334	0.00120492	TRUE	UP
TC0X00002468.mm.2	Gm38425; Gab3	0.605127	0.00734801	0.0012389	TRUE	UP
TC1400000574.mm.2	Pnp	0.732174	0.00770352	0.00130751	TRUE	UP
TC0400002275.mm.2	Atp6v0d2	0.839475	0.00770886	0.00130934	TRUE	UP
TC0400000718.mm.2	Orm1	0.585598	0.00783201	0.00133531	TRUE	UP
TC1900001541.mm.2	Got1	0.71058	0.00791088	0.00134983	TRUE	UP
TC1100003401.mm.2	Ccl3	0.61779	0.00804109	0.00137386	TRUE	UP
TC0400003390.mm.2	Cdc20	0.774493	0.00809066	0.00138488	TRUE	UP
TC0200002894.mm.2	Celf2	0.704185	0.00825467	0.00141748	TRUE	UP
TC1700000496.mm.2	Cdkn1a	1.82317	0.00855534	0.00147675	TRUE	UP
TC0500001408.mm.2	Tmem120b	0.634801	0.00869674	0.00150507	TRUE	UP
TC0600003205.mm.2	Fkbp4	0.777319	0.00872698	0.00151266	TRUE	UP
TC0400002549.mm.2	Gne	0.590996	0.00875762	0.00151955	TRUE	UP
TC1200001605.mm.2	Pik3cg	0.596159	0.00918596	0.00160587	TRUE	UP
TC0700002124.mm.2	Nlrp12	0.763605	0.0101355	0.00180016	TRUE	UP
TC0100003449.mm.2	Mpzl1	0.706667	0.0103707	0.00184942	TRUE	UP
TC1900000127.mm.2	Ppp1r14b	0.621413	0.0115419	0.00209828	TRUE	UP
TC1100000547.mm.2	Adamts2	0.59942	0.0115606	0.00210221	TRUE	UP
TC0500002757.mm.2	Cxcl11	0.650996	0.0119288	0.00218153	TRUE	UP
TC0700001673.mm.2	Insc	0.760942	0.0120604	0.00221156	TRUE	UP
TC1900001131.mm.2	Ms4a7	0.836576	0.0121004	0.00221945	TRUE	UP
TC0500002896.mm.2	Gbp11	1.01772	0.0122019	0.00224025	TRUE	UP
TC1900000015.mm.2	1810055G02Rik	0.928116	0.0122325	0.00224833	TRUE	UP
TC0400001047.mm.2	Pde4b	0.654203	0.0125048	0.00230995	TRUE	UP
TC0400001147.mm.2	Zcchc11	0.583007	0.0126481	0.00233984	TRUE	UP
TC0200004676.mm.2	Gpcpd1	1.11408	0.0131019	0.00243677	TRUE	UP
TC0200004602.mm.2	Il1b	0.588388	0.0136898	0.00257508	TRUE	UP
TC0100001765.mm.2	Dusp10	0.618406	0.0137343	0.00258568	TRUE	UP
TC0900000003.mm.2	Gm10721	1.10288	0.014731	0.00281472	TRUE	UP
TC0400001785.mm.2	Epha2	0.668514	0.0149236	0.00285555	TRUE	UP
TC1700000644.mm.2	Tnxb	0.603569	0.0149841	0.00286983	TRUE	UP
TC1700001699.mm.2	Dusp1	0.99375	0.0150418	0.00288155	TRUE	UP
TC1300002543.mm.2	Ccnb1	0.586413	0.0156684	0.00302276	TRUE	UP
TC1200001464.mm.2	Pqlc3	0.690598	0.015676	0.00302494	TRUE	UP
TC0100003522.mm.2	Fcgr2b	0.597645	0.0166775	0.00325423	TRUE	UP
TC0400002095.mm.2	Mxra8	0.617917	0.0174662	0.00343016	TRUE	UP
TC1700001154.mm.2	Ehd3	0.625616	0.019252	0.00384742	TRUE	UP
TC1600001742.mm.2	Nfkbiz	0.666848	0.019535	0.00391563	TRUE	UP
TC0500001240.mm.2	Oasl1	0.721866	0.0204366	0.00413316	TRUE	UP
TC1500001568.mm.2	Atad2	0.596558	0.0230925	0.00477741	TRUE	UP
TC0300001364.mm.2	Cenpe	0.590634	0.0234698	0.0048692	TRUE	UP
TC1700000214.mm.2	Fpr2; Fpr3	0.580652	0.0248292	0.00520937	TRUE	UP
TC1700000047.mm.2	Synj2	0.710435	0.0260647	0.00552126	TRUE	UP
TC0600001433.mm.2	Cdca3	0.673533	0.0264384	0.00562224	TRUE	UP
TC0100001943.mm.2	Mybl1	0.715688	0.0274794	0.00588791	TRUE	UP
TC0500002895.mm.2	Gbp10; Gbp6	0.805272	0.0290968	0.00632094	TRUE	UP
TC1600002094.mm.2	Rcan1	0.928098	0.029436	0.00641453	TRUE	UP
TC0200001006.mm.2	Dhrs9	0.795236	0.0295187	0.00643785	TRUE	UP
TC0900000132.mm.2	Chordc1	0.74663	0.0295606	0.00644965	TRUE	UP
TC1100001895.mm.2	Slc16a5	0.970761	0.0296166	0.00646455	TRUE	UP
TC1100004202.mm.2	Actg1; Mir6935	0.795272	0.0322066	0.0071662	TRUE	UP
TC0400001449.mm.2	Csf3r	0.662482	0.0338879	0.00761477	TRUE	UP
TC0800001891.mm.2	1810011O10Rik	0.722482	0.0340225	0.00765299	TRUE	UP
TC1800000291.mm.2	Kif20a	0.62029	0.0346572	0.00782542	TRUE	UP
TC0500000260.mm.2	Insig1	0.679203	0.039479	0.00915772	TRUE	UP
TC1100003409.mm.2	Gm11437	0.771377	0.040752	0.00952091	TRUE	UP
TC0900002817.mm.2	Tmed3	0.582663	0.0469564	0.0113151	TRUE	UP
TC0700001875.mm.2	Itgam	0.709493	0.0518223	0.012721	TRUE	UP
TC0400000401.mm.2	Gm10600	0.625036	0.0542183	0.0134868	TRUE	UP
TC0700000896.mm.2	Nav2	0.592337	0.0545651	0.0135909	TRUE	UP
TC0500000922.mm.2	Cxcl13	0.633188	0.0591989	0.0150223	TRUE	UP
TC0400000386.mm.2	Gm3893; 4933409K07Rik	0.60096	0.0618866	0.0158777	TRUE	UP
TC0100000393.mm.2	Coq10b	0.701214	0.0688206	0.0180714	TRUE	UP
TC0200000879.mm.2	Upp2	0.847518	0.079607	0.0216853	TRUE	UP
TC0200002961.mm.2	Pfkfb3	0.787011	0.0844436	0.0234448	TRUE	UP
TC1800000301.mm.2	Egr1	1.08315	0.087265	0.0244748	TRUE	UP
TC0200004251.mm.2	Prrg4	0.592772	0.0876476	0.0246225	TRUE	UP
TC0500001464.mm.2	Aacs	1.03996	0.0930496	0.0265977	TRUE	UP
TC1200001460.mm.2	Lpin1	0.943007	0.0978611	0.0283236	TRUE	UP
TC0300002957.mm.2	Cyp2u1	-5.18254	3.58198e-30	2.74221e-33	TRUE	DOWN
TC1100003561.mm.2	Abcc3	-5.07504	1.08237e-28	9.74848e-32	TRUE	DOWN
TC0700001252.mm.2	Nox4	-5.83984	2.88001e-28	2.74676e-31	TRUE	DOWN
TC0400001223.mm.2	Cyp4a12b	-10.4337	2.88001e-28	2.85329e-31	TRUE	DOWN
TC1500001945.mm.2	Cyp2d11; Mir7684	-3.0406	1.71762e-26	2.47519e-29	TRUE	DOWN
TC0X00001501.mm.2	Alas2	-3.3658	2.63722e-26	3.91914e-29	TRUE	DOWN
TC1000000713.mm.2	Upb1	-2.33216	4.69329e-25	8.4541e-28	TRUE	DOWN
TC1900000254.mm.2	Keg1	-5.5371	2.0785e-24	3.93124e-27	TRUE	DOWN
TC1900001550.mm.2	Cyp2c44	-6.43257	2.28568e-24	4.42602e-27	TRUE	DOWN
TC0400001221.mm.2	Cyp4a12a	-11.8522	5.59132e-24	1.10789e-26	TRUE	DOWN
TC1500001944.mm.2	Cyp2d22	-2.22389	8.96876e-24	1.8175e-26	TRUE	DOWN
TC1700001805.mm.2	Glo1	-2.34815	1.0287e-23	2.13097e-26	TRUE	DOWN
TC0100000427.mm.2	Aox1	-3.27821	1.27777e-23	2.81954e-26	TRUE	DOWN
TC1500000760.mm.2	Cyp2d12	-2.5296	1.77952e-23	4.00684e-26	TRUE	DOWN
TC1700000832.mm.2	Adgrf1	-4.97393	2.91706e-23	6.83091e-26	TRUE	DOWN
TC0400003234.mm.2	Scp2	-3.49257	3.17478e-23	7.57738e-26	TRUE	DOWN
TC1500001953.mm.2	Cyp2d13	-2.63531	1.07771e-22	2.66929e-25	TRUE	DOWN
TC0300001413.mm.2	Adh6-ps1	-4.51737	1.319e-22	3.4451e-25	TRUE	DOWN
TC1400000301.mm.2	Chdh	-2.73449	4.48355e-22	1.19125e-24	TRUE	DOWN
TC1500001946.mm.2	Cyp2d10	-1.23007	1.19437e-21	3.49608e-24	TRUE	DOWN
TC1500000014.mm.2	C6	-5.35611	1.49228e-21	4.43531e-24	TRUE	DOWN
TC1500000072.mm.2	Ugt3a1	-4.57205	1.76018e-21	5.45197e-24	TRUE	DOWN
TC0X00003057.mm.2	Serpina7	-5.42418	1.76018e-21	5.46086e-24	TRUE	DOWN
TC0300001414.mm.2	Adh4	-4.02603	1.76018e-21	5.54351e-24	TRUE	DOWN
TC0500002693.mm.2	Ugt2b5	-1.79507	1.76018e-21	5.54863e-24	TRUE	DOWN
TC0300000484.mm.2	Sucnr1	-4.05826	2.70035e-21	8.75554e-24	TRUE	DOWN
TC1200000236.mm.2	Adi1	-1.42212	3.81729e-21	1.30647e-23	TRUE	DOWN
TC0400002606.mm.2	Gabbr2	-3.09176	3.87353e-21	1.34316e-23	TRUE	DOWN
TC0300001494.mm.2	Uox	-2.90473	3.09183e-20	1.23918e-22	TRUE	DOWN
TC1500001531.mm.2	Enpp2	-2.92995	4.18533e-20	1.75284e-22	TRUE	DOWN
TC1900001477.mm.2	Cyp2c67	-3.67292	5.00831e-20	2.12006e-22	TRUE	DOWN
TC0500002692.mm.2	Ugt2b36	-1.279	6.41621e-20	2.77383e-22	TRUE	DOWN
TC1100003999.mm.2	Abca8a	-5.06429	1.70451e-19	7.87125e-22	TRUE	DOWN
TC0300001322.mm.2	Etnppl	-6.41812	1.70451e-19	7.90616e-22	TRUE	DOWN
TC1500000757.mm.2	Cyp2d9	-6.37127	1.72744e-19	8.09031e-22	TRUE	DOWN
TC0600000711.mm.2	Abcg2	-2.78076	2.54658e-19	1.22707e-21	TRUE	DOWN
TC0600003345.mm.2	Slc15a5	-3.29089	3.04945e-19	1.48312e-21	TRUE	DOWN
TC0600001374.mm.2	Mug2	-2.30924	4.78013e-19	2.38942e-21	TRUE	DOWN
TC0400003097.mm.2	Cyp2j6	-1.17524	6.9116e-19	3.48599e-21	TRUE	DOWN
TC1500001430.mm.2	Dpys	-1.72259	7.67503e-19	3.9056e-21	TRUE	DOWN
TC0600001422.mm.2	C1ra	-1.09389	8.66027e-19	4.52396e-21	TRUE	DOWN
TC1600000376.mm.2	Il1rap	-3.17701	9.10157e-19	4.79548e-21	TRUE	DOWN
TC1100003276.mm.2	Pipox	-1.11567	9.30245e-19	4.94321e-21	TRUE	DOWN
TC1100000940.mm.2	Asgr2	-1.75257	1.04574e-18	5.604e-21	TRUE	DOWN
TC0200004690.mm.2	Hao1	-2.08614	1.84353e-18	1.01284e-20	TRUE	DOWN
TC0200003109.mm.2	Hnmt	-2.14464	2.84119e-18	1.58654e-20	TRUE	DOWN
TC1300000442.mm.2	Dsp	-1.82732	2.88723e-18	1.62525e-20	TRUE	DOWN
TC0500002882.mm.2	Hsd17b11	-1.98016	5.26923e-18	3.10848e-20	TRUE	DOWN
TC1000003127.mm.2	Hsd17b6	-5.56562	1.80242e-17	1.17828e-19	TRUE	DOWN
TC0300001482.mm.2	Ddah1	-6.01745	1.80242e-17	1.18505e-19	TRUE	DOWN
TC0500000837.mm.2	5830473C10Rik	-2.43111	1.82305e-17	1.20949e-19	TRUE	DOWN
TC0600003108.mm.2	C1s1	-0.911087	1.8335e-17	1.23026e-19	TRUE	DOWN
TC0300003173.mm.2	Acadm	-1.75511	1.85955e-17	1.25611e-19	TRUE	DOWN
TC0300001667.mm.2	Car1	-3.97634	1.97935e-17	1.34595e-19	TRUE	DOWN
TC0100001550.mm.2	Aldh9a1	-1.01159	2.05186e-17	1.4045e-19	TRUE	DOWN
TC0100003104.mm.2	Adora1	-3.14129	3.12031e-17	2.178e-19	TRUE	DOWN
TC1900001445.mm.2	Ppp1r3c	-7.44527	3.74964e-17	2.66794e-19	TRUE	DOWN
TC0200002869.mm.2	Mcm10	-4.01935	3.97109e-17	2.84339e-19	TRUE	DOWN
TC0300001365.mm.2	Bdh2	-2.13018	4.27975e-17	3.08367e-19	TRUE	DOWN
TC1500001136.mm.2	Ghr	-1.12824	6.57907e-17	4.91816e-19	TRUE	DOWN
TC0300002558.mm.2	Hsd3b2	-4.37266	7.40809e-17	5.57125e-19	TRUE	DOWN
TC1400002266.mm.2	Ephx2	-1.82527	8.47635e-17	6.41281e-19	TRUE	DOWN
TC1800001366.mm.2	Aldh7a1	-1.1858	8.86999e-17	6.75056e-19	TRUE	DOWN
TC0800002950.mm.2	Ldhd	-1.90891	1.07738e-16	8.3935e-19	TRUE	DOWN
TC1500002328.mm.2	Agxt2	-2.18726	1.11026e-16	8.69968e-19	TRUE	DOWN
TC0300001221.mm.2	Dpyd	-1.58076	1.11736e-16	8.80562e-19	TRUE	DOWN
TC0400002174.mm.2	Car8	-1.93438	1.14455e-16	9.07148e-19	TRUE	DOWN
TC0400001681.mm.2	Tcea3	-1.87002	1.43056e-16	1.14671e-18	TRUE	DOWN
TC0X00002482.mm.2	Pls3	-1.06889	1.43071e-16	1.15328e-18	TRUE	DOWN
TC1200002077.mm.2	Entpd5	-1.4581	1.627e-16	1.32616e-18	TRUE	DOWN
TC0300002277.mm.2	Cd1d1	-1.7056	1.65854e-16	1.35933e-18	TRUE	DOWN
TC0600001424.mm.2	C1rb	-1.10031	2.22472e-16	1.84341e-18	TRUE	DOWN
TC1400001655.mm.2	Il17rb	-2.86966	2.26654e-16	1.88827e-18	TRUE	DOWN
TC1000002645.mm.2	Chpt1	-2.24388	2.73595e-16	2.30398e-18	TRUE	DOWN
TC0800002704.mm.2	Ces1e	-2.31694	3.05335e-16	2.59877e-18	TRUE	DOWN
TC0900001921.mm.2	Dpy19l1	-1.59764	3.09784e-16	2.66454e-18	TRUE	DOWN
TC0300003245.mm.2	Gstm6	-1.55357	3.21188e-16	2.77709e-18	TRUE	DOWN
TC0500002592.mm.2	Ociad2	-2.75944	3.71604e-16	3.22974e-18	TRUE	DOWN
TC0400001141.mm.2	Echdc2	-1.52053	4.77276e-16	4.19116e-18	TRUE	DOWN
TC0100003825.mm.2	Gm3934	-3.26447	7.0581e-16	6.35712e-18	TRUE	DOWN
TC0300001244.mm.2	Gclm	-1.12924	9.33697e-16	8.53555e-18	TRUE	DOWN
TC1000002943.mm.2	Slc35e3	-1.44621	1.09687e-15	1.00766e-17	TRUE	DOWN
TC1900000897.mm.2	Gstp2	-2.62476	1.27766e-15	1.1795e-17	TRUE	DOWN
TC0400001743.mm.2	Akr7a5	-1.40996	1.29616e-15	1.20826e-17	TRUE	DOWN
TC1300000019.mm.2	Akr1c13	-1.52897	1.42236e-15	1.33667e-17	TRUE	DOWN
TC1800001461.mm.2	Fech	-1.11553	1.42236e-15	1.33871e-17	TRUE	DOWN
TC0600001296.mm.2	44263	-1.44676	1.44826e-15	1.3696e-17	TRUE	DOWN
TC0700004409.mm.2	Oat	-3.794	1.5224e-15	1.44903e-17	TRUE	DOWN
TC1300001378.mm.2	Akr1c12	-1.60426	1.63104e-15	1.56449e-17	TRUE	DOWN
TC1500001141.mm.2	Egln3	-3.04317	1.90243e-15	1.83338e-17	TRUE	DOWN
TC1200001262.mm.2	Adssl1	-1.69487	1.95551e-15	1.89334e-17	TRUE	DOWN
TC1300002176.mm.2	Fbp1	-1.34986	1.95731e-15	1.90389e-17	TRUE	DOWN
TC0500000488.mm.2	Lap3	-1.65221	2.23114e-15	2.1803e-17	TRUE	DOWN
TC0900002719.mm.2	Gsta2	-4.36842	4.09284e-15	4.1286e-17	TRUE	DOWN
TC1500002053.mm.2	Odf3b	-2.29978	4.55212e-15	4.63289e-17	TRUE	DOWN
TC1700000567.mm.2	Cyp4f15	-1.20129	4.78844e-15	4.89497e-17	TRUE	DOWN
TC0800000394.mm.2	Gsr	-1.17431	5.72413e-15	5.87725e-17	TRUE	DOWN
TC0700000458.mm.2	Blvrb	-1.91607	5.95901e-15	6.17208e-17	TRUE	DOWN
TC0900001297.mm.2	Slco2a1	-2.01225	6.3953e-15	6.68157e-17	TRUE	DOWN
TC1900000896.mm.2	Gstp1	-2.8377	1.00301e-14	1.08856e-16	TRUE	DOWN
TSUnmapped00000008.mm.2	44256	-1.04446	1.02392e-14	1.12047e-16	TRUE	DOWN
TC0800002706.mm.2	Ces1g	-2.4723	1.04423e-14	1.14741e-16	TRUE	DOWN
TC0X00000323.mm.2	Pgrmc1	-0.727663	1.05853e-14	1.16788e-16	TRUE	DOWN
TC0600001421.mm.2	C1rl	-1.20986	1.06825e-14	1.18341e-16	TRUE	DOWN
TC1300002196.mm.2	Slc35d2	-1.20141	1.13004e-14	1.26205e-16	TRUE	DOWN
TC1700001209.mm.2	Galm	-1.19107	1.35813e-14	1.53513e-16	TRUE	DOWN
TC0500000836.mm.2	Afm	-1.12699	1.46843e-14	1.66642e-16	TRUE	DOWN
TC0200000037.mm.2	Phyh	-0.857428	1.56181e-14	1.79348e-16	TRUE	DOWN
TC0900003293.mm.2	Zfp445	-1.54989	1.58574e-14	1.8281e-16	TRUE	DOWN
TC0400001010.mm.2	Pgm2	-0.87529	1.81292e-14	2.13083e-16	TRUE	DOWN
TC0700004165.mm.2	Arl6ip1	-1.12388	2.08574e-14	2.47027e-16	TRUE	DOWN
TC1800001122.mm.2	Proc	-1.02018	2.47263e-14	2.97304e-16	TRUE	DOWN
TC0300002559.mm.2	Hsd3b3	-3.53136	2.48314e-14	2.99685e-16	TRUE	DOWN
TC0700000652.mm.2	Cebpa	-1.60714	2.49659e-14	3.02433e-16	TRUE	DOWN
TC1600001316.mm.2	Comt	-1.03404	2.55238e-14	3.12639e-16	TRUE	DOWN
TC0100001533.mm.2	Ildr2	-1.77643	2.96195e-14	3.72145e-16	TRUE	DOWN
TC0500003489.mm.2	Cox19	-1.29966	3.3544e-14	4.22963e-16	TRUE	DOWN
TC0700003823.mm.2	Plekhb1	-2.1613	3.59529e-14	4.56576e-16	TRUE	DOWN
TC1800000105.mm.2	Ttc39c	-2.1402	3.70924e-14	4.72716e-16	TRUE	DOWN
TC0900001049.mm.2	Gm3776; Gsta1	-2.84763	3.73029e-14	4.77079e-16	TRUE	DOWN
TC0300002702.mm.2	Prok1	-1.91091	4.1149e-14	5.29975e-16	TRUE	DOWN
TC0400003101.mm.2	Cyp2j5	-2.66241	4.50176e-14	5.81827e-16	TRUE	DOWN
TC0100003738.mm.2	44256	-0.859873	4.69873e-14	6.094e-16	TRUE	DOWN
TC0600000902.mm.2	Eva1a	-1.44558	5.54775e-14	7.24511e-16	TRUE	DOWN
TC0700000917.mm.2	Gas2	-2.41726	6.68905e-14	8.79583e-16	TRUE	DOWN
TC1300001494.mm.2	Sugct	-1.47815	6.77409e-14	8.93816e-16	TRUE	DOWN
TC1500001955.mm.2	Cyp2d40	-0.980525	7.44214e-14	9.88666e-16	TRUE	DOWN
TC0600001768.mm.2	Mettl20	-2.93688	1.19032e-13	1.62419e-15	TRUE	DOWN
TC1200000183.mm.2	Iah1	-1.03274	1.45259e-13	1.99513e-15	TRUE	DOWN
TC1000002572.mm.2	Nfyb	-1.28103	1.5508e-13	2.15692e-15	TRUE	DOWN
TC0300001176.mm.2	Olfm3	-1.46808	1.5508e-13	2.15796e-15	TRUE	DOWN
TC1800000468.mm.2	Kcnn2	-1.31649	1.88102e-13	2.66829e-15	TRUE	DOWN
TC1900000040.mm.2	Pcx	-0.978623	1.90916e-13	2.7168e-15	TRUE	DOWN
TC0100003190.mm.2	Gm4788	-0.948569	1.92293e-13	2.75338e-15	TRUE	DOWN
TC0400003590.mm.2	Rbbp4	-1.49031	2.31622e-13	3.37952e-15	TRUE	DOWN
TC0300002553.mm.2	Hsd3b4; Gm10681	-4.47476	2.74914e-13	4.04832e-15	TRUE	DOWN
TC1700001621.mm.2	1600002H07Rik	-2.72716	2.84887e-13	4.20801e-15	TRUE	DOWN
TC0700002023.mm.2	Cyp2e1	-1.94009	3.00821e-13	4.47046e-15	TRUE	DOWN
TC0700002857.mm.2	Dpy19l3	-2.63893	3.0519e-13	4.54913e-15	TRUE	DOWN
TC0600001375.mm.2	Gm10319	-1.38232	3.22773e-13	4.85482e-15	TRUE	DOWN
TC1500002056.mm.2	Arsa	-2.30781	3.3517e-13	5.05638e-15	TRUE	DOWN
TC1100002030.mm.2	Slc25a10	-1.17824	3.97139e-13	6.0449e-15	TRUE	DOWN
TC0700002720.mm.2	Spint2	-1.43835	4.76048e-13	7.28885e-15	TRUE	DOWN
TC1100003997.mm.2	Abca8b	-1.709	4.84354e-13	7.43784e-15	TRUE	DOWN
TC1000001577.mm.2	Sdr9c7	-2.87855	5.02326e-13	7.75906e-15	TRUE	DOWN
TC1500001957.mm.2	Cyp2d26	-0.691957	5.1219e-13	7.9345e-15	TRUE	DOWN
TC0800000538.mm.2	Acsl1	-2.30967	5.42952e-13	8.45994e-15	TRUE	DOWN
TC1500000221.mm.2	Sdc2	-1.37864	5.47062e-13	8.54861e-15	TRUE	DOWN
TC1200001583.mm.2	Sntg2	-1.86357	5.85898e-13	9.20825e-15	TRUE	DOWN
TC0300002218.mm.2	Tdo2	-1.95917	6.13181e-13	9.69226e-15	TRUE	DOWN
TC0600001082.mm.2	Hdac11	-1.38145	6.68011e-13	1.06492e-14	TRUE	DOWN
TC1900001481.mm.2	Cyp2c54	-3.76	6.98752e-13	1.12337e-14	TRUE	DOWN
TC0300002725.mm.2	Gstm1	-0.868841	7.01123e-13	1.13033e-14	TRUE	DOWN
TC0400003344.mm.2	Akr1a1	-0.732409	7.94534e-13	1.29524e-14	TRUE	DOWN
TC1400001047.mm.2	Esd	-0.919221	8.23114e-13	1.34554e-14	TRUE	DOWN
TC0700001615.mm.2	Akip1	-1.02011	8.23618e-13	1.35007e-14	TRUE	DOWN
TC1000001895.mm.2	Enpp3	-2.85451	8.94026e-13	1.47354e-14	TRUE	DOWN
TC0600000974.mm.2	Tprkb	-1.16071	9.34765e-13	1.5491e-14	TRUE	DOWN
TC0700000514.mm.2	Ech1	-1.27118	1.01882e-12	1.71134e-14	TRUE	DOWN
TC0900001038.mm.2	Gclc	-1.67391	1.05647e-12	1.7841e-14	TRUE	DOWN
TC0100001726.mm.2	9130409I23Rik	-2.29533	1.09393e-12	1.86706e-14	TRUE	DOWN
TC1300000020.mm.2	Akr1c19	-2.21223	1.13969e-12	1.95029e-14	TRUE	DOWN
TC1100004107.mm.2	Acox1	-1.44087	1.29476e-12	2.22732e-14	TRUE	DOWN
TC0600000854.mm.2	Retsat	-2.13755	1.3189e-12	2.27478e-14	TRUE	DOWN
TC0400003184.mm.2	C8a	-4.47534	1.34801e-12	2.33713e-14	TRUE	DOWN
TC0600001672.mm.2	Slco1b2	-1.68257	1.38372e-12	2.41151e-14	TRUE	DOWN
TC1700000842.mm.2	Enpp5	-1.33589	1.50396e-12	2.62784e-14	TRUE	DOWN
TC0700000693.mm.2	1600014C10Rik	-1.48074	1.54659e-12	2.71569e-14	TRUE	DOWN
TC0500002881.mm.2	Hsd17b13	-1.1531	1.54659e-12	2.71625e-14	TRUE	DOWN
TC1800000890.mm.2	Cyb5a	-0.792283	1.55514e-12	2.73826e-14	TRUE	DOWN
TC0900001048.mm.2	Gsta4	-1.59332	1.66745e-12	2.94354e-14	TRUE	DOWN
TC1100000053.mm.2	Nipsnap1	-0.828678	1.81065e-12	3.21263e-14	TRUE	DOWN
TC0100003739.mm.2	44257	-1.06025	1.95642e-12	3.4889e-14	TRUE	DOWN
TC1500001832.mm.2	Tmprss6	-0.722319	2.00609e-12	3.5865e-14	TRUE	DOWN
TC1900001059.mm.2	Slc22a28	-1.50125	2.03349e-12	3.6538e-14	TRUE	DOWN
TC0300002551.mm.2	Hsd3b4; Gm10681; Gm4450	-4.99605	2.10781e-12	3.79683e-14	TRUE	DOWN
TC1000002900.mm.2	Tmem19	-1.41766	2.625e-12	4.77574e-14	TRUE	DOWN
TC1000000596.mm.2	Pbld1	-1.54764	2.64837e-12	4.83019e-14	TRUE	DOWN
TC0300000095.mm.2	Car3	-5.41259	2.68832e-12	4.91516e-14	TRUE	DOWN
TC0600002626.mm.2	Cml1	-1.47245	2.9249e-12	5.37404e-14	TRUE	DOWN
TC1700002187.mm.2	Gnmt	-1.20359	2.95915e-12	5.4503e-14	TRUE	DOWN
TC1900000565.mm.2	Cyp2c29; Cyp2c53-ps	-2.1265	3.03408e-12	5.61562e-14	TRUE	DOWN
TC0800002744.mm.2	Cfap20	-1.23565	3.07384e-12	5.73075e-14	TRUE	DOWN
TC0600001696.mm.2	Etnk1	-1.01274	3.69684e-12	7.04208e-14	TRUE	DOWN
TC0100002601.mm.2	Abcb6	-1.44355	3.94437e-12	7.62016e-14	TRUE	DOWN
TC1500001783.mm.2	Slc39a4	-2.63094	4.09518e-12	7.92995e-14	TRUE	DOWN
TC0100000778.mm.2	2810459M11Rik	-0.959366	4.16252e-12	8.07911e-14	TRUE	DOWN
TC1200001921.mm.2	Tmem30b	-1.05663	4.57909e-12	8.92887e-14	TRUE	DOWN
TC0500000791.mm.2	Ugt2b35	-1.36475	4.73632e-12	9.25679e-14	TRUE	DOWN
TC1000001286.mm.2	Osbpl8	-1.33911	4.74825e-12	9.30148e-14	TRUE	DOWN
TC0400001305.mm.2	Hyi	-1.73033	5.01926e-12	9.8776e-14	TRUE	DOWN
TC0400004204.mm.2	Gm13152; Gm13139	-1.61239	5.0442e-12	9.94939e-14	TRUE	DOWN
TC0900002537.mm.2	Lactb	-0.978804	5.0911e-12	1.00877e-13	TRUE	DOWN
TC0600002326.mm.2	Inmt	-3.69284	5.4168e-12	1.07819e-13	TRUE	DOWN
TC1700001856.mm.2	Cyp4f14	-0.918641	6.08483e-12	1.21938e-13	TRUE	DOWN
TC0300002554.mm.2	Hsd3b5	-5.47672	6.09794e-12	1.22475e-13	TRUE	DOWN
TC1700000009.mm.2	Tiam2	-1.6692	6.21244e-12	1.25055e-13	TRUE	DOWN
TC1100002451.mm.2	Chac2	-1.24714	7.01512e-12	1.43108e-13	TRUE	DOWN
TC0100003186.mm.2	Cfhr1	-1.20842	7.14257e-12	1.46029e-13	TRUE	DOWN
TC0400002779.mm.2	Mup20	-3.12978	7.55254e-12	1.54892e-13	TRUE	DOWN
TC0600003365.mm.2	Slco1a1	-5.49681	7.55254e-12	1.55091e-13	TRUE	DOWN
TC0500003600.mm.2	Cyp3a11	-1.47571	7.69129e-12	1.58287e-13	TRUE	DOWN
TC1300002445.mm.2	Scamp1	-1.78085	8.12883e-12	1.68155e-13	TRUE	DOWN
TC0500002690.mm.2	Ugt2b1	-1.52697	8.71083e-12	1.81623e-13	TRUE	DOWN
TC1200000614.mm.2	Daam1	-0.818895	8.91607e-12	1.86304e-13	TRUE	DOWN
TC1500001952.mm.2	Cyp2d34	-1.50415	9.68663e-12	2.05517e-13	TRUE	DOWN
TC1000000595.mm.2	Pbld2	-1.36926	9.82075e-12	2.09187e-13	TRUE	DOWN
TC0800002705.mm.2	Ces1f	-3.16308	9.98972e-12	2.13686e-13	TRUE	DOWN
TC0400001970.mm.2	Slc2a5	-2.60009	1.01252e-11	2.1704e-13	TRUE	DOWN
TC0200002885.mm.2	Dhtkd1	-1.49187	1.08781e-11	2.3416e-13	TRUE	DOWN
TC0700003581.mm.2	Idh2	-1.33538	1.10136e-11	2.38069e-13	TRUE	DOWN
TC0700001715.mm.2	Acsm3	-1.23848	1.10826e-11	2.40428e-13	TRUE	DOWN
TC1500001807.mm.2	Apol7a	-2.13214	1.10826e-11	2.40557e-13	TRUE	DOWN
TC0800000120.mm.2	Cul4a	-0.888913	1.25696e-11	2.75099e-13	TRUE	DOWN
TC0100003679.mm.2	Ephx1	-1.6292	1.34078e-11	2.9465e-13	TRUE	DOWN
TC1100004099.mm.2	Galk1	-1.1837	1.38125e-11	3.04788e-13	TRUE	DOWN
TC0200003880.mm.2	Serping1	-0.918551	1.44162e-11	3.20056e-13	TRUE	DOWN
TC1100003505.mm.2	Akap1	-0.889819	1.57256e-11	3.51253e-13	TRUE	DOWN
TC0800001955.mm.2	Adrb3	-1.50587	1.58131e-11	3.53917e-13	TRUE	DOWN
TC1400001438.mm.2	Acox2	-1.17449	1.59883e-11	3.59128e-13	TRUE	DOWN
TC0400001881.mm.2	Gm13251	-1.58509	1.6511e-11	3.71769e-13	TRUE	DOWN
TC1100000939.mm.2	Asgr1	-0.716105	2.0203e-11	4.58727e-13	TRUE	DOWN
TC1800000794.mm.2	Acaa2	-0.845924	2.07717e-11	4.73318e-13	TRUE	DOWN
TC0100000428.mm.2	Aox3	-1.59953	2.10779e-11	4.81243e-13	TRUE	DOWN
TC0700001939.mm.2	Lhpp	-1.92154	2.36077e-11	5.44319e-13	TRUE	DOWN
TC0700004321.mm.2	Sephs2	-1.05092	2.37796e-11	5.50424e-13	TRUE	DOWN
TC0300001554.mm.2	Cryz	-0.936304	2.39608e-11	5.55698e-13	TRUE	DOWN
TC0200004634.mm.2	Ddrgk1	-0.721322	2.4158e-11	5.62445e-13	TRUE	DOWN
TC1700001618.mm.2	Amdhd2	-0.821449	2.72865e-11	6.40199e-13	TRUE	DOWN
TC1900000250.mm.2	Glyat	-1.00687	3.13289e-11	7.46329e-13	TRUE	DOWN
TC1700000337.mm.2	Eci1	-1.14342	3.22297e-11	7.70691e-13	TRUE	DOWN
TC0700001343.mm.2	Nars2	-1.32306	3.47886e-11	8.4128e-13	TRUE	DOWN
TC0800002594.mm.2	Gcdh	-1.16275	3.6564e-11	8.92447e-13	TRUE	DOWN
TC1500000568.mm.2	Zfp707	-1.64614	3.98304e-11	9.81141e-13	TRUE	DOWN
TC0100001607.mm.2	Dcaf8	-0.645362	4.06992e-11	1.0047e-12	TRUE	DOWN
TC1500000034.mm.2	C9	-1.79708	4.1944e-11	1.04265e-12	TRUE	DOWN
TC1000002035.mm.2	AI317395	-1.35132	4.31947e-11	1.07569e-12	TRUE	DOWN
TC0800001358.mm.2	Nudt7	-2.21013	4.4423e-11	1.11227e-12	TRUE	DOWN
TC1000001284.mm.2	Csrp2	-0.983913	4.61261e-11	1.16165e-12	TRUE	DOWN
TC0100001526.mm.2	Creg1	-0.839257	4.74722e-11	1.19931e-12	TRUE	DOWN
TC0500003742.mm.2	Tmem184a	-1.61437	4.92089e-11	1.2454e-12	TRUE	DOWN
TSUnmapped00000014.mm.2	Nudt7	-1.88377	5.25928e-11	1.33777e-12	TRUE	DOWN
TC0900000664.mm.2	Ireb2	-1.18511	5.25928e-11	1.33815e-12	TRUE	DOWN
TC0200003214.mm.2	Sardh	-1.04264	5.71771e-11	1.46251e-12	TRUE	DOWN
TC0400000716.mm.2	Col27a1	-1.4279	6.49266e-11	1.67243e-12	TRUE	DOWN
TC1300000016.mm.2	Akr1c14	-1.5517	6.82179e-11	1.76335e-12	TRUE	DOWN
TC0300000482.mm.2	Aadac	-0.779873	6.88339e-11	1.78238e-12	TRUE	DOWN
TC0100002332.mm.2	Pms1	-0.996123	7.25185e-11	1.89738e-12	TRUE	DOWN
TC0400002713.mm.2	Epb41l4b	-1.41096	7.35583e-11	1.9279e-12	TRUE	DOWN
TC0200004241.mm.2	Hipk3; Mir1902	-0.997319	7.46167e-11	1.96572e-12	TRUE	DOWN
TC0400003100.mm.2	Cyp2j9	-2.17346	7.51747e-11	1.98381e-12	TRUE	DOWN
TC0500002696.mm.2	Ugt2b38	-1.37031	7.74429e-11	2.04715e-12	TRUE	DOWN
TC1000003114.mm.2	Inhbe	-3.04243	8.0818e-11	2.14001e-12	TRUE	DOWN
TC0200003529.mm.2	Neb	-1.35793	8.0873e-11	2.1451e-12	TRUE	DOWN
TC0800001883.mm.2	Gpat4	-1.23917	8.13179e-11	2.16423e-12	TRUE	DOWN
TC0100000386.mm.2	Ormdl1	-1.09971	8.47037e-11	2.26197e-12	TRUE	DOWN
TC1400001661.mm.2	Itih3	-1.82871	8.7854e-11	2.35005e-12	TRUE	DOWN
TC0100000039.mm.2	Adhfe1	-0.983514	9.00509e-11	2.41693e-12	TRUE	DOWN
TC0700000564.mm.2	Prodh2	-0.858442	9.14767e-11	2.46344e-12	TRUE	DOWN
TC0800001133.mm.2	Mmp15	-1.95252	9.27484e-11	2.50186e-12	TRUE	DOWN
TC0900001050.mm.2	Gm10639	-2.03868	9.465e-11	2.55742e-12	TRUE	DOWN
TC0600002607.mm.2	Sfxn5	-1.10587	9.66021e-11	2.61886e-12	TRUE	DOWN
TC0400004070.mm.2	Park7	-0.837373	1.08023e-10	2.95279e-12	TRUE	DOWN
TC0900001455.mm.2	Cspg5	-1.09933	1.15691e-10	3.17804e-12	TRUE	DOWN
TC0900002292.mm.2	Fdx1	-0.862808	1.22239e-10	3.36955e-12	TRUE	DOWN
TC0700001922.mm.2	Acadsb	-1.13031	1.225e-10	3.38716e-12	TRUE	DOWN
TC0900001902.mm.2	1810064F22Rik	-1.90045	1.32975e-10	3.73069e-12	TRUE	DOWN
TC0200002136.mm.2	Dstn	-0.863859	1.51671e-10	4.27011e-12	TRUE	DOWN
TC1400000777.mm.2	Dhrs4	-1.16408	1.74749e-10	5.00498e-12	TRUE	DOWN
TC0600001373.mm.2	Mug1	-1.02971	1.9144e-10	5.50889e-12	TRUE	DOWN
TC0700004509.mm.2	Sirt3	-1.2677	1.95533e-10	5.63546e-12	TRUE	DOWN
TC0100000652.mm.2	Fam134a	-0.636721	2.16958e-10	6.29203e-12	TRUE	DOWN
TC0600001515.mm.2	Clec2h	-4.10293	2.18218e-10	6.33842e-12	TRUE	DOWN
TC0600003600.mm.2	Cml5	-3.12507	2.83402e-10	8.37213e-12	TRUE	DOWN
TC1500000599.mm.2	Adck5	-2.25168	2.9775e-10	8.83622e-12	TRUE	DOWN
TC1800001017.mm.2	Aqp4	-1.47998	3.15792e-10	9.38587e-12	TRUE	DOWN
TC0300000689.mm.2	Cd1d2	-1.12319	3.26014e-10	9.70437e-12	TRUE	DOWN
TC0400002776.mm.2	Mup-ps19; Mup20	-4.01533	3.73828e-10	1.12792e-11	TRUE	DOWN
TC0100003725.mm.2	Mia3	-0.957989	3.75754e-10	1.13711e-11	TRUE	DOWN
TC0400001087.mm.2	C8b	-2.95161	3.77921e-10	1.14707e-11	TRUE	DOWN
TC0700002096.mm.2	Slc22a18	-0.682011	3.88753e-10	1.1852e-11	TRUE	DOWN
TC0400002791.mm.2	Alad	-0.931739	3.97113e-10	1.21248e-11	TRUE	DOWN
TC0600003109.mm.2	C1s2	-0.776196	4.09407e-10	1.2537e-11	TRUE	DOWN
TC0500001210.mm.2	Iscu	-0.881033	4.93619e-10	1.52936e-11	TRUE	DOWN
TC1600001548.mm.2	Pdia5	-0.96808	5.2132e-10	1.62223e-11	TRUE	DOWN
TC0200002830.mm.2	Prpf6	-0.863207	5.86273e-10	1.83491e-11	TRUE	DOWN
TC0400004215.mm.2	Mup21	-1.61571	6.01513e-10	1.89073e-11	TRUE	DOWN
TC1200000798.mm.2	Acot1	-2.96504	6.61149e-10	2.09903e-11	TRUE	DOWN
TC1200002535.mm.2	Serpina11	-1.29909	6.88549e-10	2.19222e-11	TRUE	DOWN
TC1100001875.mm.2	Ttyh2	-0.760018	7.68263e-10	2.46677e-11	TRUE	DOWN
TC1900000212.mm.2	Prpf19	-0.779402	7.69841e-10	2.47531e-11	TRUE	DOWN
TC0700001709.mm.2	Acsm5	-1.04123	8.30851e-10	2.67896e-11	TRUE	DOWN
TC1200001874.mm.2	L2hgdh	-1.01547	8.43305e-10	2.72355e-11	TRUE	DOWN
TC0700002496.mm.2	Apoc1	-0.797409	8.43305e-10	2.72671e-11	TRUE	DOWN
TC0300000967.mm.2	Fmo5	-1.65444	9.36428e-10	3.04889e-11	TRUE	DOWN
TC1000002493.mm.2	Gamt	-0.950598	9.47973e-10	3.09502e-11	TRUE	DOWN
TC0200001843.mm.2	Sord	-0.806232	9.5795e-10	3.13622e-11	TRUE	DOWN
TC0900002718.mm.2	Gm8074	-1.59478	9.7385e-10	3.19266e-11	TRUE	DOWN
TC0600001813.mm.2	Slc25a13	-1.38656	1.01535e-09	3.34701e-11	TRUE	DOWN
TC0400001387.mm.2	Trit1	-1.15795	1.05428e-09	3.48485e-11	TRUE	DOWN
TC0600001279.mm.2	Pparg	-2.02993	1.14091e-09	3.78438e-11	TRUE	DOWN
TC0800001196.mm.2	Ces2e	-0.885417	1.15214e-09	3.82906e-11	TRUE	DOWN
TC1600001352.mm.2	Clcn2	-1.21701	1.19436e-09	4.01238e-11	TRUE	DOWN
TC1400002756.mm.2	Ggact	-0.855236	1.27129e-09	4.28803e-11	TRUE	DOWN
TC1100003418.mm.2	Dhrs11	-0.804764	1.27192e-09	4.29587e-11	TRUE	DOWN
TC1300001670.mm.2	Aldh5a1	-0.974764	1.32977e-09	4.50921e-11	TRUE	DOWN
TC0500003516.mm.2	Gna12	-1.04087	1.33841e-09	4.54456e-11	TRUE	DOWN
TC1900000335.mm.2	Aldh1a1	-1.0633	1.35766e-09	4.61602e-11	TRUE	DOWN
TC1000003078.mm.2	Slc16a7	-1.95556	1.36021e-09	4.63081e-11	TRUE	DOWN
TC0100001165.mm.2	Pigr	-0.796739	1.36648e-09	4.65832e-11	TRUE	DOWN
TC0500002760.mm.2	Scarb2	-0.725833	1.41404e-09	4.83318e-11	TRUE	DOWN
TC0400003327.mm.2	Faah	-0.72442	1.65211e-09	5.68932e-11	TRUE	DOWN
TC0100003374.mm.2	Prdx6	-0.957391	1.65211e-09	5.69155e-11	TRUE	DOWN
TC1500002181.mm.2	Adcy6	-1.07929	1.65238e-09	5.69992e-11	TRUE	DOWN
TC1600000335.mm.2	St6gal1	-2.26667	1.67377e-09	5.78124e-11	TRUE	DOWN
TC0300002959.mm.2	Sgms2	-1.63656	1.72752e-09	5.97467e-11	TRUE	DOWN
TC0300003103.mm.2	Dnase2b	-1.78386	1.84884e-09	6.41092e-11	TRUE	DOWN
TC1300000594.mm.2	Spin1	-0.701286	2.23122e-09	7.76696e-11	TRUE	DOWN
TC1900000567.mm.2	Cyp2c37	-1.4508	2.45322e-09	8.595e-11	TRUE	DOWN
TC0900001348.mm.2	Abhd14b	-0.939112	2.45548e-09	8.61397e-11	TRUE	DOWN
TC1900000249.mm.2	Gm4952	-3.13629	2.66403e-09	9.38157e-11	TRUE	DOWN
TC1800000103.mm.2	Lama3	-1.67384	2.69338e-09	9.52131e-11	TRUE	DOWN
TC0600002620.mm.2	Nat8	-1.55946	2.72587e-09	9.64846e-11	TRUE	DOWN
TC0200001773.mm.2	Chp1	-0.863641	2.91055e-09	1.03414e-10	TRUE	DOWN
TC0400000580.mm.2	Slc44a1	-1.07438	2.94762e-09	1.04864e-10	TRUE	DOWN
TC0900001578.mm.2	Xylb	-1.04763	2.98732e-09	1.06411e-10	TRUE	DOWN
TC1000000150.mm.2	Map7	-0.709837	3.00398e-09	1.0714e-10	TRUE	DOWN
TC0300002561.mm.2	Hsd3b6	-1.12502	3.06594e-09	1.09488e-10	TRUE	DOWN
TC1100002324.mm.2	Ugp2	-1.03909	3.19624e-09	1.14717e-10	TRUE	DOWN
TC0600003017.mm.2	Adipor2	-0.791594	3.24218e-09	1.16725e-10	TRUE	DOWN
TC0X00000209.mm.2	Rgn	-0.828062	3.24218e-09	1.16804e-10	TRUE	DOWN
TC1900000206.mm.2	Vwce	-1.46918	3.66854e-09	1.33486e-10	TRUE	DOWN
TC1300001882.mm.2	Ranbp9	-0.626504	3.80482e-09	1.3913e-10	TRUE	DOWN
TC1300002011.mm.2	Auh	-0.831757	3.93806e-09	1.44534e-10	TRUE	DOWN
TC0800001200.mm.2	Ces3a	-0.892301	4.02732e-09	1.48535e-10	TRUE	DOWN
TC0500003576.mm.2	Baiap2l1	-1.49163	4.14598e-09	1.53658e-10	TRUE	DOWN
TC1000001298.mm.2	Nap1l1	-0.759583	4.21831e-09	1.56529e-10	TRUE	DOWN
TC1300000674.mm.2	Txndc15	-0.808207	4.33921e-09	1.61602e-10	TRUE	DOWN
TC0200002669.mm.2	Rtfdc1	-0.903895	4.34956e-09	1.62183e-10	TRUE	DOWN
TC0600002486.mm.2	Rnf181	-0.751395	5.34897e-09	2.01375e-10	TRUE	DOWN
TC0300003087.mm.2	Cyr61	-1.52393	5.36722e-09	2.02304e-10	TRUE	DOWN
TC0300002926.mm.2	Enpep	-1.27375	5.39208e-09	2.03484e-10	TRUE	DOWN
TC0600003208.mm.2	BC048546	-1.81431	5.46823e-09	2.06604e-10	TRUE	DOWN
TC1500001023.mm.2	Gpd1	-1.04105	5.50159e-09	2.08112e-10	TRUE	DOWN
TC1800001463.mm.2	Atp8b1	-0.739257	5.55098e-09	2.10474e-10	TRUE	DOWN
TC1400000783.mm.2	Fitm1	-1.4779	5.55098e-09	2.1048e-10	TRUE	DOWN
TC1400001306.mm.2	Rap2a	-1.35138	5.57182e-09	2.11521e-10	TRUE	DOWN
TC1300000162.mm.2	Gpx6	-1.35482	6.34048e-09	2.43271e-10	TRUE	DOWN
TC0X00000396.mm.2	Xiap	-0.595145	6.66179e-09	2.56199e-10	TRUE	DOWN
TC1200001742.mm.2	Egln3	-1.28424	7.16662e-09	2.76905e-10	TRUE	DOWN
TC1500000087.mm.2	Amacr	-0.760326	7.36676e-09	2.8497e-10	TRUE	DOWN
TC1200002078.mm.2	Aldh6a1	-0.720815	8.02165e-09	3.12471e-10	TRUE	DOWN
TC1100001183.mm.2	Rab11fip4	-0.924638	8.25426e-09	3.22647e-10	TRUE	DOWN
TC0900001099.mm.2	Sh3bgrl2	-1.07473	8.59433e-09	3.37101e-10	TRUE	DOWN
TC0200002632.mm.2	Tshz2	-1.11774	8.69669e-09	3.41507e-10	TRUE	DOWN
TC1000002658.mm.2	Slc17a8	-1.54803	1.06461e-08	4.22853e-10	TRUE	DOWN
TC1900001729.mm.2	Shtn1	-0.794511	1.08986e-08	4.33863e-10	TRUE	DOWN
TC0800003163.mm.2	Abcb10	-1.16556	1.11839e-08	4.46945e-10	TRUE	DOWN
TC0600003314.mm.2	Hebp1	-0.835199	1.16237e-08	4.65347e-10	TRUE	DOWN
TC0200002476.mm.2	Sgk2	-1.65438	1.16807e-08	4.68155e-10	TRUE	DOWN
TC1300001471.mm.2	Tbce	-0.97404	1.20747e-08	4.84488e-10	TRUE	DOWN
TC1000002562.mm.2	Zfp938	-0.620127	1.26352e-08	5.09254e-10	TRUE	DOWN
TC1900000028.mm.2	Tmem134	-0.711975	1.26437e-08	5.10165e-10	TRUE	DOWN
TC0100003483.mm.2	Mgst3	-1.57721	1.32339e-08	5.36365e-10	TRUE	DOWN
TC1700000354.mm.2	Hagh	-0.697283	1.33443e-08	5.41439e-10	TRUE	DOWN
TC1800000319.mm.2	Cxxc5	-0.837174	1.41227e-08	5.74932e-10	TRUE	DOWN
TC0500001179.mm.2	Tpst2	-1.07629	1.49319e-08	6.09217e-10	TRUE	DOWN
TC1100003207.mm.2	Srr	-0.656739	1.56208e-08	6.39164e-10	TRUE	DOWN
TC1800000762.mm.2	Mbd2	-0.637518	1.57346e-08	6.45511e-10	TRUE	DOWN
TC1800000590.mm.2	Isoc1	-0.709384	1.64069e-08	6.7605e-10	TRUE	DOWN
TC0600001458.mm.2	Scnn1a	-1.75018	1.66958e-08	6.89456e-10	TRUE	DOWN
TC1400000833.mm.2	Rcbtb1	-0.701739	1.67564e-08	6.9422e-10	TRUE	DOWN
TC0500002695.mm.2	Ugt2a3	-0.906449	1.75989e-08	7.3071e-10	TRUE	DOWN
TC0900001070.mm.2	Myo6	-0.737518	1.82327e-08	7.5867e-10	TRUE	DOWN
TC0X00003313.mm.2	Syap1	-0.630688	1.83241e-08	7.63297e-10	TRUE	DOWN
TC0X00000471.mm.2	Hprt	-0.602953	1.87614e-08	7.83203e-10	TRUE	DOWN
TC0900002712.mm.2	Fbxo9	-0.592047	1.87641e-08	7.84414e-10	TRUE	DOWN
TC1400002310.mm.2	Slc25a37	-1.09098	1.87641e-08	7.85006e-10	TRUE	DOWN
TC1100004064.mm.2	Fads6	-0.774511	1.88838e-08	7.90864e-10	TRUE	DOWN
TC0400001670.mm.2	Hmgcl	-0.785109	1.90724e-08	8.00482e-10	TRUE	DOWN
TC1000000386.mm.2	Sec63	-0.630308	1.91608e-08	8.05053e-10	TRUE	DOWN
TC0200001806.mm.2	Adal	-0.582808	2.08325e-08	8.79983e-10	TRUE	DOWN
TC1200002445.mm.2	Nudt14	-0.816594	2.21868e-08	9.39188e-10	TRUE	DOWN
TC1900001619.mm.2	Pcgf6	-0.736558	2.22957e-08	9.44801e-10	TRUE	DOWN
TC0500002713.mm.2	Grsf1	-0.603696	2.58696e-08	1.1044e-09	TRUE	DOWN
TC1900000898.mm.2	BC021614	-1.18103	2.80726e-08	1.20983e-09	TRUE	DOWN
TC0400001034.mm.2	Ak4	-1.8237	2.81637e-08	1.21502e-09	TRUE	DOWN
TC0300002297.mm.2	Apoa1bp	-0.603804	2.85612e-08	1.23474e-09	TRUE	DOWN
TC0100002965.mm.2	Steap3	-1.28792	2.89939e-08	1.25606e-09	TRUE	DOWN
TC1800001521.mm.2	Fam210a; Mir7219	-0.91433	2.9719e-08	1.29015e-09	TRUE	DOWN
TC0300000555.mm.2	Mfsd1	-0.702337	2.97554e-08	1.29307e-09	TRUE	DOWN
TC0200001524.mm.2	Slc1a2	-1.55911	3.10251e-08	1.34965e-09	TRUE	DOWN
TC1600001124.mm.2	Adcy9	-1.02797	3.20695e-08	1.39797e-09	TRUE	DOWN
TC0500001165.mm.2	Mn1	-0.811576	3.27993e-08	1.43274e-09	TRUE	DOWN
TC1600001559.mm.2	Fam162a	-0.725199	3.31217e-08	1.4498e-09	TRUE	DOWN
TC1300000383.mm.2	Nqo2	-0.771413	3.39573e-08	1.48791e-09	TRUE	DOWN
TC1300002536.mm.2	Ocln	-1.41804	3.45402e-08	1.515e-09	TRUE	DOWN
TC0800001481.mm.2	Zfpm1	-1.17174	3.47831e-08	1.52722e-09	TRUE	DOWN
TC1800001280.mm.2	Mcc	-1.25395	3.54724e-08	1.56228e-09	TRUE	DOWN
TSUnmapped00000013.mm.2	Nudt7	-2.26556	3.65436e-08	1.61439e-09	TRUE	DOWN
TC0100002645.mm.2	Serpine2	-1.20158	3.73543e-08	1.65694e-09	TRUE	DOWN
TC1800001431.mm.2	Ablim3	-1.57549	3.75054e-08	1.66533e-09	TRUE	DOWN
TC0300000491.mm.2	P2ry1	-1.07743	3.76483e-08	1.67337e-09	TRUE	DOWN
TC0800002314.mm.2	Klhl2	-0.80337	3.83528e-08	1.70641e-09	TRUE	DOWN
TC1100003629.mm.2	Pnpo	-0.800634	4.06032e-08	1.81385e-09	TRUE	DOWN
TC0900000927.mm.2	Myo1e	-0.762301	4.18019e-08	1.86928e-09	TRUE	DOWN
TC1400000530.mm.2	Tmem260	-0.740362	4.37186e-08	1.95893e-09	TRUE	DOWN
TC0500002386.mm.2	Adgra3; Adgra2	-0.79404	4.49336e-08	2.01944e-09	TRUE	DOWN
TC0300002611.mm.2	Slc22a15	-0.994293	4.59147e-08	2.06767e-09	TRUE	DOWN
TC0900003234.mm.2	Acaa1b	-1.77708	4.65207e-08	2.09706e-09	TRUE	DOWN
TC0400004214.mm.2	Mup3	-0.983243	4.92117e-08	2.22944e-09	TRUE	DOWN
TC0800001531.mm.2	Rhou	-1.44223	4.99411e-08	2.26473e-09	TRUE	DOWN
TC0X00003361.mm.2	Prps2	-0.699982	5.13815e-08	2.33931e-09	TRUE	DOWN
TC0900002379.mm.2	Cyp1a2	-1.65118	5.28976e-08	2.4131e-09	TRUE	DOWN
TC1100004232.mm.2	Dus1l	-0.85288	5.96119e-08	2.74087e-09	TRUE	DOWN
TC1800000152.mm.2	Dsg1c	-1.36938	6.72189e-08	3.1209e-09	TRUE	DOWN
TC1300002772.mm.2	Zfp595	-0.857138	6.80193e-08	3.16419e-09	TRUE	DOWN
TC1000002374.mm.2	Gucd1	-0.947663	6.80338e-08	3.16792e-09	TRUE	DOWN
TC0700001015.mm.2	Fam169b	-0.971304	6.85662e-08	3.1958e-09	TRUE	DOWN
TC0600002644.mm.2	Anxa4	-0.606322	7.44944e-08	3.5047e-09	TRUE	DOWN
TC1100001576.mm.2	Gsdma2	-1.56647	7.8289e-08	3.69128e-09	TRUE	DOWN
TC0200002849.mm.2	Meig1	-0.997699	8.34399e-08	3.94166e-09	TRUE	DOWN
TC0200000431.mm.2	Obp2a	-2.25681	9.03301e-08	4.28342e-09	TRUE	DOWN
TC0900003051.mm.2	Apeh	-0.596522	9.2382e-08	4.3932e-09	TRUE	DOWN
TC0700002879.mm.2	Plekhf1	-0.927953	9.47929e-08	4.51212e-09	TRUE	DOWN
TC0600002643.mm.2	Gmcl1	-0.734982	9.67975e-08	4.61917e-09	TRUE	DOWN
TC0900001376.mm.2	Hyal1; Nat6; Hyal3	-1.00679	9.67975e-08	4.62465e-09	TRUE	DOWN
TC1200000839.mm.2	Mfsd7c	-1.35101	9.67975e-08	4.62604e-09	TRUE	DOWN
TC1000000175.mm.2	H60b; Raet1a; Raet1b; Raet1c; Raet1d; Raet1e	-1.81263	9.95762e-08	4.78016e-09	TRUE	DOWN
TC0400002238.mm.2	Necab1	-0.909801	1.00437e-07	4.82599e-09	TRUE	DOWN
TC1700001451.mm.2	Igf2r	-0.766576	1.02336e-07	4.92184e-09	TRUE	DOWN
TC1900001768.mm.2	Slc22a30	-0.657663	1.22508e-07	5.95822e-09	TRUE	DOWN
TC1300000568.mm.2	Omd	-1.39428	1.23061e-07	5.99069e-09	TRUE	DOWN
TC0500003126.mm.2	Pebp1	-0.952428	1.24271e-07	6.05519e-09	TRUE	DOWN
TC0800000975.mm.2	Hook2	-1.11192	1.30397e-07	6.36541e-09	TRUE	DOWN
TC0600003374.mm.2	Gys2	-1.94766	1.41526e-07	6.92673e-09	TRUE	DOWN
TC0100002831.mm.2	Mterf4	-0.862826	1.41526e-07	6.92781e-09	TRUE	DOWN
TC1800000852.mm.2	Pqlc1	-1.26212	1.44347e-07	7.08541e-09	TRUE	DOWN
TC0500003168.mm.2	Plbd2	-0.622482	1.53175e-07	7.55319e-09	TRUE	DOWN
TC1600002158.mm.2	C2cd2	-0.836141	1.58743e-07	7.8635e-09	TRUE	DOWN
TC0200002890.mm.2	Echdc3	-1.05594	1.62977e-07	8.10264e-09	TRUE	DOWN
TC0100002308.mm.2	Myo1b	-0.906159	1.76882e-07	8.8417e-09	TRUE	DOWN
TC1000000746.mm.2	Ftcd	-0.610924	1.77341e-07	8.87266e-09	TRUE	DOWN
TC0500001570.mm.2	Cldn3	-0.791522	1.77813e-07	8.90426e-09	TRUE	DOWN
TC1500000207.mm.2	Cmbl	-1.27199	1.79911e-07	9.02555e-09	TRUE	DOWN
TC0500001641.mm.2	Zkscan1	-0.818659	1.99591e-07	1.00667e-08	TRUE	DOWN
TC1500000805.mm.2	Atxn10	-0.647373	2.02414e-07	1.02183e-08	TRUE	DOWN
TC0500000876.mm.2	Fam47e	-1.50951	2.10108e-07	1.06537e-08	TRUE	DOWN
TC0300002565.mm.2	Hsd3b1	-0.732681	2.10108e-07	1.0654e-08	TRUE	DOWN
TC1900000763.mm.2	Pdcd4	-0.962192	2.15269e-07	1.09253e-08	TRUE	DOWN
TC0400001890.mm.2	Gm13248	-1.08609	2.35407e-07	1.20004e-08	TRUE	DOWN
TC1100003118.mm.2	C1qbp	-0.628062	2.44096e-07	1.24763e-08	TRUE	DOWN
TC1700000869.mm.2	Mrpl14	-0.868025	2.52135e-07	1.29099e-08	TRUE	DOWN
TC0700004346.mm.2	Prss8	-1.31848	2.5698e-07	1.31927e-08	TRUE	DOWN
TC0400004058.mm.2	H6pd	-1.27717	2.60749e-07	1.34214e-08	TRUE	DOWN
TC1700001847.mm.2	Zfp871	-0.911612	2.62078e-07	1.35089e-08	TRUE	DOWN
TC0900001416.mm.2	Dalrd3	-0.596322	2.62078e-07	1.35134e-08	TRUE	DOWN
TC0200000060.mm.2	Usp6nl	-0.946612	2.64568e-07	1.36537e-08	TRUE	DOWN
TC1500000713.mm.2	Sgsm3	-0.611431	2.65409e-07	1.37201e-08	TRUE	DOWN
TC0500000057.mm.2	Tmem243	-0.64433	2.66011e-07	1.37642e-08	TRUE	DOWN
TC0300001315.mm.2	Casp6	-1.30783	2.90041e-07	1.50336e-08	TRUE	DOWN
TC1500001040.mm.2	Mettl7a1	-0.688297	2.91131e-07	1.51033e-08	TRUE	DOWN
TC0500003468.mm.2	Gjc3	-0.938225	3.03788e-07	1.58146e-08	TRUE	DOWN
TC0700002383.mm.2	Sult2a8	-0.866467	3.05964e-07	1.59555e-08	TRUE	DOWN
TC1700002333.mm.2	Lonp1	-0.675109	3.08922e-07	1.61375e-08	TRUE	DOWN
TC1000001531.mm.2	Lrig3	-0.656196	3.32359e-07	1.74367e-08	TRUE	DOWN
TC0800001919.mm.2	Bag4	-0.781014	3.38285e-07	1.77628e-08	TRUE	DOWN
TC0300000180.mm.2	Slc2a2	-0.90625	3.45938e-07	1.81958e-08	TRUE	DOWN
TC0200005090.mm.2	Oser1	-0.663225	3.63302e-07	1.91909e-08	TRUE	DOWN
TC0800000796.mm.2	Slc27a1	-0.829529	3.68391e-07	1.94763e-08	TRUE	DOWN
TC1400002065.mm.2	Cebpe	-0.721431	3.71043e-07	1.96333e-08	TRUE	DOWN
TC0200001859.mm.2	Sqrdl	-0.835217	3.80048e-07	2.01387e-08	TRUE	DOWN
TC1600000958.mm.2	Bach1	-0.940489	4.25925e-07	2.28249e-08	TRUE	DOWN
TC0200003624.mm.2	Dpp4	-0.743841	4.31957e-07	2.3226e-08	TRUE	DOWN
TC1300001033.mm.2	Dhfr	-0.762029	4.42525e-07	2.38142e-08	TRUE	DOWN
TC0600001591.mm.2	Crebl2	-0.708243	4.4795e-07	2.41263e-08	TRUE	DOWN
TC0500001302.mm.2	Fbxo21	-2.13734	4.79122e-07	2.59131e-08	TRUE	DOWN
TC1400001785.mm.2	Fam213a	-1.02111	4.80131e-07	2.59893e-08	TRUE	DOWN
TC1100000161.mm.2	Egfr	-1.69034	4.87334e-07	2.6423e-08	TRUE	DOWN
TC0200005220.mm.2	Atp9a	-0.973424	4.92624e-07	2.67368e-08	TRUE	DOWN
TC0800000645.mm.2	Aadat	-1.00147	4.93647e-07	2.6832e-08	TRUE	DOWN
TSUnmapped00000015.mm.2	Nudt7	-1.66399	4.96355e-07	2.70016e-08	TRUE	DOWN
TC0200003747.mm.2	Gm11084	-0.702319	5.10152e-07	2.7867e-08	TRUE	DOWN
TC1600000218.mm.2	Aifm3	-0.910634	5.29594e-07	2.91198e-08	TRUE	DOWN
TC1700001644.mm.2	Fahd1	-0.795453	5.37304e-07	2.95921e-08	TRUE	DOWN
TC0800000346.mm.2	Prosc	-0.636304	5.55121e-07	3.06984e-08	TRUE	DOWN
TC1500001395.mm.2	Ncald; Gm15941	-1.03708	5.76912e-07	3.20074e-08	TRUE	DOWN
TC0500001673.mm.2	Gpr146; D830046C22Rik	-1.21509	5.80121e-07	3.22376e-08	TRUE	DOWN
TC0800002008.mm.2	Ubxn8	-0.65567	6.53029e-07	3.66421e-08	TRUE	DOWN
TC1800000107.mm.2	Cabyr	-1.45462	6.53128e-07	3.66771e-08	TRUE	DOWN
TC1500002346.mm.2	Plec	-0.839801	6.60718e-07	3.7133e-08	TRUE	DOWN
TC1200001248.mm.2	Zfyve21	-0.726467	6.77232e-07	3.81526e-08	TRUE	DOWN
TC1700002354.mm.2	Gpr108	-0.694112	6.96385e-07	3.94512e-08	TRUE	DOWN
TC1000002320.mm.2	Arid5b	-2.09306	7.10461e-07	4.02806e-08	TRUE	DOWN
TC0200003532.mm.2	Arl5a	-0.594547	7.65327e-07	4.35636e-08	TRUE	DOWN
TC0900000876.mm.2	Rps27l	-0.678333	7.74026e-07	4.41634e-08	TRUE	DOWN
TC0500002698.mm.2	Sult1b1	-0.996739	7.76718e-07	4.43519e-08	TRUE	DOWN
TC1300001804.mm.2	Rpp40	-0.69837	7.82653e-07	4.47613e-08	TRUE	DOWN
TC0200001047.mm.2	Pdk1	-1.0065	7.90215e-07	4.52294e-08	TRUE	DOWN
TC0600001366.mm.2	Pex26	-1.10072	7.91853e-07	4.53588e-08	TRUE	DOWN
TC0900002268.mm.2	Pts	-0.617572	8.17624e-07	4.68718e-08	TRUE	DOWN
TC0800003235.mm.2	Znrf1	-0.687156	8.25899e-07	4.74206e-08	TRUE	DOWN
TC0800003052.mm.2	Fbxo31	-0.822373	8.36043e-07	4.81725e-08	TRUE	DOWN
TC1700000563.mm.2	Cyp4f17	-0.833025	8.36043e-07	4.81913e-08	TRUE	DOWN
TC0600000821.mm.2	Fabp1	-0.713533	8.36516e-07	4.82938e-08	TRUE	DOWN
TC0200001826.mm.2	Casc4	-0.825543	9.45828e-07	5.49454e-08	TRUE	DOWN
TC0900001375.mm.2	Hyal2	-0.646178	1.02228e-06	5.9939e-08	TRUE	DOWN
TC1200000287.mm.2	Atxn7l1	-1.35348	1.04293e-06	6.14075e-08	TRUE	DOWN
TC0200003362.mm.2	Stom	-0.942808	1.046e-06	6.17067e-08	TRUE	DOWN
TC1200000751.mm.2	Smoc1	-0.659891	1.05905e-06	6.25245e-08	TRUE	DOWN
TC0600002783.mm.2	Suclg2	-0.651504	1.10973e-06	6.56165e-08	TRUE	DOWN
TC1100000029.mm.2	Gal3st1	-0.771739	1.1372e-06	6.74454e-08	TRUE	DOWN
TC1200002049.mm.2	Zfyve1	-0.725254	1.18849e-06	7.07189e-08	TRUE	DOWN
TC0400001090.mm.2	1700024P16Rik	-1.05105	1.18849e-06	7.08083e-08	TRUE	DOWN
TC0900000833.mm.2	Parp16	-0.905399	1.19798e-06	7.14281e-08	TRUE	DOWN
TC0700004474.mm.2	Bnip3	-1.38034	1.19875e-06	7.15274e-08	TRUE	DOWN
TC0600003048.mm.2	Bid	-0.635127	1.22137e-06	7.30472e-08	TRUE	DOWN
TC1300000264.mm.2	Slc17a2	-0.789257	1.24428e-06	7.45243e-08	TRUE	DOWN
TC0900002601.mm.2	Lipc	-0.5975	1.25072e-06	7.49667e-08	TRUE	DOWN
TC0600002616.mm.2	Gm4477	-1.30808	1.27332e-06	7.64361e-08	TRUE	DOWN
TC1500001389.mm.2	Zfp706	-0.656141	1.33263e-06	8.03561e-08	TRUE	DOWN
TC1300000385.mm.2	Bphl	-0.587572	1.43096e-06	8.65434e-08	TRUE	DOWN
TC0900001576.mm.2	Acaa1a	-0.968424	1.43916e-06	8.72333e-08	TRUE	DOWN
TC0100001579.mm.2	Nr1i3	-1.43031	1.45101e-06	8.81482e-08	TRUE	DOWN
TC0600002460.mm.2	Thnsl2	-0.831304	1.45489e-06	8.84954e-08	TRUE	DOWN
TC1000000830.mm.2	Wdr18	-0.616594	1.45489e-06	8.85144e-08	TRUE	DOWN
TC0900000848.mm.2	Rbpms2	-0.697156	1.56515e-06	9.59276e-08	TRUE	DOWN
TC1000001901.mm.2	Akap7	-0.648569	1.56856e-06	9.62071e-08	TRUE	DOWN
TC0200004763.mm.2	Rbbp9	-0.609511	1.62473e-06	1.00018e-07	TRUE	DOWN
TC0300000880.mm.2	Selenbp1	-1.00382	1.66325e-06	1.02689e-07	TRUE	DOWN
TC0600001092.mm.2	Slc6a6	-0.646667	1.7063e-06	1.05446e-07	TRUE	DOWN
TC0X00000363.mm.2	Zbtb33	-0.693551	1.71064e-06	1.05923e-07	TRUE	DOWN
TC1200001485.mm.2	Zfp125	-0.853605	1.75814e-06	1.09102e-07	TRUE	DOWN
TC1100002932.mm.2	Zswim7	-0.723152	1.79759e-06	1.11874e-07	TRUE	DOWN
TC0600003367.mm.2	Gm6614	-0.919909	1.857e-06	1.15822e-07	TRUE	DOWN
TC1300001902.mm.2	Dtnbp1	-0.635616	1.87504e-06	1.172e-07	TRUE	DOWN
TC0500003088.mm.2	Acads	-0.640036	1.89168e-06	1.18411e-07	TRUE	DOWN
TC1600000763.mm.2	Cpox	-0.71096	1.90613e-06	1.19401e-07	TRUE	DOWN
TC1300001654.mm.2	Lrrc16a	-1.11741	2.0056e-06	1.26084e-07	TRUE	DOWN
TC0400003629.mm.2	Serinc2	-1.04449	2.08293e-06	1.31415e-07	TRUE	DOWN
TC0X00002703.mm.2	Awat2	-0.72721	2.13299e-06	1.34861e-07	TRUE	DOWN
TC0200004159.mm.2	Cd82	-0.624982	2.19612e-06	1.39149e-07	TRUE	DOWN
TC0700004494.mm.2	Echs1	-0.596431	2.23742e-06	1.42111e-07	TRUE	DOWN
TC0400002792.mm.2	Pole3	-0.617464	2.23742e-06	1.42169e-07	TRUE	DOWN
TC0300002453.mm.2	Cgn	-0.923351	2.2944e-06	1.46409e-07	TRUE	DOWN
TC0400003694.mm.2	Sytl1	-0.811196	2.54663e-06	1.64225e-07	TRUE	DOWN
TC0400003236.mm.2	Zyg11a	-1.15638	2.65425e-06	1.71643e-07	TRUE	DOWN
TC1300000466.mm.2	Smim13	-0.896232	2.73739e-06	1.77389e-07	TRUE	DOWN
TC1000003119.mm.2	Lrp1	-0.664058	2.75417e-06	1.78725e-07	TRUE	DOWN
TC0400002454.mm.2	Bag1	-0.596141	2.83695e-06	1.84863e-07	TRUE	DOWN
TC0400004198.mm.2	Gm13139; Znf41-ps	-0.976123	2.90453e-06	1.89659e-07	TRUE	DOWN
TC0900000714.mm.2	Edc3	-0.627156	3.055e-06	2.00723e-07	TRUE	DOWN
TC1100002225.mm.2	Ddc	-2.03272	3.1672e-06	2.08237e-07	TRUE	DOWN
TC0X00003308.mm.2	Txlng	-0.612971	3.35247e-06	2.21475e-07	TRUE	DOWN
TC1000002525.mm.2	Creb3l3	-1.2865	3.41027e-06	2.25908e-07	TRUE	DOWN
TC0400003456.mm.2	Rlf	-0.796866	3.49561e-06	2.31876e-07	TRUE	DOWN
TC0900000748.mm.2	Hexa	-0.748859	3.58223e-06	2.37945e-07	TRUE	DOWN
TC1400002090.mm.2	Emc9	-1.08002	3.60295e-06	2.39482e-07	TRUE	DOWN
TC0700003804.mm.2	Slco2b1	-0.697591	3.71595e-06	2.47998e-07	TRUE	DOWN
TC0600003489.mm.2	Glcci1	-0.622862	3.71872e-06	2.4835e-07	TRUE	DOWN
TC0400004050.mm.2	Slc25a33	-0.709493	3.75578e-06	2.51364e-07	TRUE	DOWN
TC0X00001402.mm.2	Nxt2	-0.642627	3.79603e-06	2.54539e-07	TRUE	DOWN
TC0100002488.mm.2	Kansl1l	-0.848732	3.84148e-06	2.5776e-07	TRUE	DOWN
TC1900000568.mm.2	Cyp2c50	-1.08572	3.92782e-06	2.63907e-07	TRUE	DOWN
TC1500000862.mm.2	Selo	-0.727699	4.11902e-06	2.77495e-07	TRUE	DOWN
TC0900003311.mm.2	Fyco1	-0.607917	4.28337e-06	2.89531e-07	TRUE	DOWN
TC1600001292.mm.2	Thap7	-0.616902	4.28898e-06	2.90104e-07	TRUE	DOWN
TC0800002799.mm.2	Cmtm4	-0.827446	4.32781e-06	2.93315e-07	TRUE	DOWN
TC0400000589.mm.2	Tmem38b	-0.703351	4.38055e-06	2.97481e-07	TRUE	DOWN
TC0800000972.mm.2	Dnase2a; Gm38426	-0.700851	4.44207e-06	3.02259e-07	TRUE	DOWN
TC0100002179.mm.2	Kansl3	-0.704964	4.45361e-06	3.03245e-07	TRUE	DOWN
TC1100001698.mm.2	Adam11	-0.920181	4.48233e-06	3.05402e-07	TRUE	DOWN
TC1900000129.mm.2	Macrod1	-0.840181	4.61266e-06	3.15321e-07	TRUE	DOWN
TC0600002492.mm.2	Tgoln1; Tgoln2	-0.82375	4.66503e-06	3.1947e-07	TRUE	DOWN
TC1000003047.mm.2	Rassf3	-0.880851	4.90497e-06	3.37733e-07	TRUE	DOWN
TC0300002860.mm.2	Fnbp1l; Mir7657	-0.657989	4.99679e-06	3.44506e-07	TRUE	DOWN
TC0700002024.mm.2	Urah	-0.660362	5.18879e-06	3.59145e-07	TRUE	DOWN
TC0700000384.mm.2	Cadm4	-0.723696	5.26316e-06	3.65004e-07	TRUE	DOWN
TC0900001519.mm.2	Cmtm6	-0.621612	5.28819e-06	3.66989e-07	TRUE	DOWN
TC0X00001665.mm.2	Pir	-1.08288	6.00195e-06	4.20834e-07	TRUE	DOWN
TC1900001485.mm.2	Sorbs1	-1.08551	6.15751e-06	4.33405e-07	TRUE	DOWN
TC0500000877.mm.2	Stbd1	-1.06152	6.31205e-06	4.45419e-07	TRUE	DOWN
TC1300002036.mm.2	Nop16	-0.782373	6.44937e-06	4.57143e-07	TRUE	DOWN
TC0900002604.mm.2	Aqp9	-0.965996	6.70266e-06	4.78115e-07	TRUE	DOWN
TC1400000944.mm.2	Chrna2	-0.983804	7.04819e-06	5.05427e-07	TRUE	DOWN
TC1100001156.mm.2	Aldoc	-0.672627	7.16358e-06	5.14545e-07	TRUE	DOWN
TC1900001529.mm.2	Pyroxd2	-0.682355	7.16358e-06	5.14864e-07	TRUE	DOWN
TC0X00001374.mm.2	Cldn2	-0.981105	7.56651e-06	5.46209e-07	TRUE	DOWN
TC0400003423.mm.2	Ccdc30	-0.653207	7.75771e-06	5.60584e-07	TRUE	DOWN
TC0500003371.mm.2	Gtf2ird1	-0.943732	7.78049e-06	5.62707e-07	TRUE	DOWN
TC0X00001781.mm.2	Magix	-0.741685	8.10601e-06	5.87583e-07	TRUE	DOWN
TC0600003105.mm.2	Pex5	-0.753913	8.26452e-06	6.00199e-07	TRUE	DOWN
TC0100002764.mm.2	Ngef	-0.659384	9.00668e-06	6.58283e-07	TRUE	DOWN
TC1100004032.mm.2	Slc39a11	-0.823804	9.447e-06	6.92593e-07	TRUE	DOWN
TC1000002616.mm.2	Syn3	-0.75962	9.57859e-06	7.03966e-07	TRUE	DOWN
TC1400000096.mm.2	Ptprg	-0.600978	1.00842e-05	7.44307e-07	TRUE	DOWN
TC0100002950.mm.2	Epb41l5	-0.667228	1.02263e-05	7.55252e-07	TRUE	DOWN
TC1100003296.mm.2	Slc13a2	-1.08143	1.03388e-05	7.65888e-07	TRUE	DOWN
TC0900002969.mm.2	Cdv3	-0.634149	1.03876e-05	7.69969e-07	TRUE	DOWN
TC1800000788.mm.2	Mbd1	-0.773152	1.04334e-05	7.74309e-07	TRUE	DOWN
TC0100002600.mm.2	Cnppd1	-0.966359	1.06012e-05	7.88285e-07	TRUE	DOWN
TC0100002349.mm.2	Pgap1	-1.0058	1.06012e-05	7.88672e-07	TRUE	DOWN
TC1900000819.mm.2	Atrnl1	-0.636395	1.08332e-05	8.07393e-07	TRUE	DOWN
TC0500001751.mm.2	Bri3	-0.861178	1.10159e-05	8.23492e-07	TRUE	DOWN
TC0100001752.mm.2	Susd4	-1.34361	1.11388e-05	8.33681e-07	TRUE	DOWN
TC0700002924.mm.2	Zfp141	-0.709004	1.132e-05	8.49793e-07	TRUE	DOWN
[truncated: 344 more rows]

## Sheet: Sheet 3
Category	Term	Count	%	PValue	Genes	List Total	Pop Hits	Pop Total
GOTERM_BP_DIRECT	GO:0002376~immune system process	108	7.56833	3.13335e-38	IFITM3, CD86, CD84, CSF1, LST1, IFIT1, IFI30, ETS1, IFIT3, IFIT2, FCNA, LGALS3, DHX58, LGALS9, HERC6, ZBP1, GBP5, RSAD2, PRKCB, CD180, TAP1, MR1, FCGR1, NAIP5, NAIP6, BTK, CD300E, PRKD2, CSF1R, VTCN1, TAPBPL, CFP, LY9, CD79B, CD79A, INPP5D, BTLA, SLAMF7, SLAMF6, CD300LD, CD14, H2-EB1, LY86, IRGM1, EIF2AK2, SERPINA3G, CD55B, ISG20, BST2, MARCO, LCN2, H2-AB1, H2-T23, PIK3CD, LRMP, ADAR, PIK3CG, IFI…	1229	383	18082
GOTERM_BP_DIRECT	GO:0045087~innate immune response	83	5.8164	5.52752e-20	IFITM3, APP, CD84, CSF1, PIK3CD, ADAR, IFIT1, IFIT3, IFIT2, IFIH1, FCNA, LGALS3, CASP4, DHX58, TNFAIP8L2, TRIM21, OASL1, OASL2, MBL2, HERC6, ZBP1, APOBEC3, FCER1G, RSAD2, SYK, RIPK2, DDX58, CD180, CYBB, CYBA, TMEM173, MR1, TLR1, FCGR1, HCK, NAIP5, AIM2, TYROBP, NAIP6, ELF4, OAS2, IRF1, BTK, IRF7, TRIM14, TLR8, TLR7, TLR6, ARHGEF2, TLR4, TLR3, TLR13, C1QB, CSF1R, C1QA, UNC93B1, OAS1A, OAS1B, NOD1,…	1229	400	18082
GOTERM_BP_DIRECT	GO:0016126~sterol biosynthetic process	19	1.33146	2.22091e-15	FDPS, MVK, HMGCS1, INSIG2, INSIG1, DHCR24, MSMO1, HMGCR, CYP51, TM7SF2, SQLE, NSDHL, PMVK, SC5D, MVD, DHCR7, 0610007P14RIK, LBR, FDFT1	1229	27	18082
GOTERM_BP_DIRECT	GO:0006629~lipid metabolic process	78	5.46601	1.09778e-13	ACSM2, TECR, PCSK9, MSMO1, GBA2, AACS, TM7SF2, FADS3, FADS2, NSDHL, LIPG, SCD2, PTGDS, SULT4A1, FADS1, SULT2A1, PTGIS, HMGCS1, LIPO1, PLA2G4A, ELOVL6, ACSL3, GPCPD1, LSS, SREBF2, PLA2G15, CYP39A1, SULT1D1, SOAT1, PLBD1, MVD, MGLL, PLPP1, PLA1A, PPARD, ISYNA1, ASAH1, MVK, TNXB, INSIG2, INSIG1, AKR1D1, GDPD1, PLD4, LPL, HMGCR, HSD17B7, ACNAT2, ACNAT1, CYP7A1, PLA2G7, HACD2, ACACA, PTGS1, HACD4, SUL…	1229	459	18082
GOTERM_BP_DIRECT	GO:0035458~cellular response to interferon-beta	21	1.47162	2.54978e-13	GBP6, TGTP2, GBP2B, TGTP1, IFI204, STAT1, IFI203, IRGM2, IRGM1, TMEM173, IFIT1, IFIT3, GM12185, AIM2, IRF1, IGTP, GBP2, GM5431, TLR3, 9930111J21RIK1, GBP3	1229	41	18082
GOTERM_BP_DIRECT	GO:0008202~steroid metabolic process	29	2.03224	5.51959e-13	MVK, INSIG2, INSIG1, AKR1D1, PCSK9, MSMO1, HMGCR, CYP7A1, TM7SF2, CYP17A1, SULT1A1, NSDHL, PMVK, APOF, SC5D, SCAP, SULT4A1, FDFT1, SULT2A1, FDPS, HMGCS1, DHCR24, SREBF2, CYP51, CYP39A1, SOAT1, MVD, 0610007P14RIK, DHCR7	1229	84	18082
GOTERM_BP_DIRECT	GO:0045071~negative regulation of viral genome replication	14	0.981079	6.30767e-08	IFITM3, RNASEL, APOBEC3, RSAD2, MX2, EIF2AK2, ADAR, ISG15, OAS1B, ISG20, PARP10, BST2, FAM111A, OASL1	1229	32	18082
GOTERM_BP_DIRECT	GO:0055114~oxidation-reduction process	84	5.88648	9.77401e-08	NCF2, GLDC, TECR, CYP3A57, MSMO1, AKR1B3, CYP3A59, IFI30, G6PD2, CYP3A16, CYP2C39, LOXL2, CYP2C38, TM7SF2, AKR1B7, FADS3, FADS2, NSDHL, SH3PXD2A, SESN3, SCD2, ME1, CYP2C70, LBR, FADS1, IDH3A, MIOX, CBR1, PTGIS, GPX3, BCKDHB, DIO1, CYP3A44, TET2, CYBB, CYBA, PGD, JMJD6, CYP39A1, F8, NDUFS7, CYP3A41A, GPD2, PXDN, G6PDX, CYP3A41B, CYP2C40, MRPS36, AKR1D1, SDR39U1, AKR1C18, SEPW1, GLRX, PDHB, HMGCR, …	1229	676	18082
GOTERM_BP_DIRECT	GO:0007159~leukocyte cell-cell adhesion	12	0.840925	1.48506e-07	CD24A, NT5E, PTPRC, ITGAM, VCAM1, ITGA4, SYK, ITGB2, MSN, APOA4, ITGAL, FERMT3	1229	24	18082
GOTERM_BP_DIRECT	GO:0052697~xenobiotic glucuronidation	8	0.560617	2.08995e-07	UGT1A10, UGT1A1, UGT1A5, UGT1A2, UGT1A9, UGT1A6A, UGT1A6B, UGT1A7C	1229	9	18082
GOTERM_BP_DIRECT	GO:0060968~regulation of gene silencing	9	0.630694	4.18593e-07	HIST2H3B, HIST1H3G, HIST2H3C2, HIST1H3H, HIST2H3C1, HIST1H3I, HIST1H3B, HIST1H3D, HIST1H3E	1229	13	18082
GOTERM_BP_DIRECT	GO:0002224~toll-like receptor signaling pathway	9	0.630694	6.1811e-06	TLR1, CD86, UNC93B1, CD180, TLR8, TLR7, TLR6, TLR4, TLR3	1229	17	18082
GOTERM_BP_DIRECT	GO:0031100~organ regeneration	15	1.05116	1.60947e-05	CDKN1A, TGFB1, UGT1A1, SLCO1A5, ADM, LIFR, MKI67, TGFBR2, CCNA2, TGFBR3, PKM, CCND1, AXL, BAK1, LPIN1	1229	56	18082
GOTERM_BP_DIRECT	GO:0051092~positive regulation of NF-kappaB transcription factor activity	21	1.47162	4.01145e-05	CD84, PRKCH, TGFB1, RIPK3, RIPK2, PRKCB, ITGB2, EIF2AK2, NOD1, IRAK3, TGFBR3, AIM2, IL1B, TRIM14, PRKD2, LRRFIP2, ARHGEF2, MAP3K13, RAB7B, TLR4, TLR3	1229	109	18082
GOTERM_BP_DIRECT	GO:0009813~flavonoid biosynthetic process	9	0.630694	4.04813e-05	UGT1A10, UGT1A1, UGT2B37, UGT1A5, UGT1A2, UGT1A9, UGT1A6A, UGT1A6B, UGT1A7C	1229	21	18082
GOTERM_BP_DIRECT	GO:1900227~positive regulation of NLRP3 inflammasome complex assembly	5	0.350385	0.000100141	ATAT1, GBP5, CD36, TLR6, TLR4	1229	5	18082
GOTERM_BP_DIRECT	GO:0006810~transport	164	11.4926	0.000117804	SLC35B4, CHIC1, ATP8A1, SLC23A1, HBB-B2, PKD2L2, FABP12, FADS3, FADS2, LAPTM4B, MPC1, MPC2, SLC16A6, AP1S2, AKT1, SLC16A9, PTGDS, SLC25A45, SLC25A44, FADS1, SLC16A5, SLC34A2, ABCG8, ABCG5, SLC38A1, SLC11A1, SPNS2, CYBB, SLC6A12, TAP1, CYBA, ATP1B3, ATP1B1, SLC51B, STIM2, KIF16B, SLC9A7, RAB34, RBP1, SLC9A9, SLC25A51, KIF20A, ABCG3, ATP6V0D2, VPS25, KPNB1, STX1A, SLC22A4, RAB5C, CHRNA4, ABCB4, ITP…	1229	1822	18082
GOTERM_BP_DIRECT	GO:0008285~negative regulation of cell proliferation	47	3.29362	0.000126856	IFITM3, CSF1R, CDKN1A, SLFN2, SRF, SLFN3, DPT, ADM, ADARB1, IFIT3, CDH5, ERBB4, INPP5D, TRIM24, HIST1H2AE, HMOX1, HIST1H2AD, CD37, HIST1H2AG, BAK1, JARID2, HIST1H2AB, NFE2, HIST1H2AO, HIST1H2AN, CDKN2C, KLF13, TGFB1, HIST1H2AI, ITGA1, TRPV2, EIF2AK2, DHCR24, PRKCA, PODN, BMP7, HIST1H2AP, PML, TGFBR2, IL1A, IRF1, IL1B, BCL2, PMP22, RARB, CTNNB1, ATF5	1229	384	18082
GOTERM_BP_DIRECT	GO:0006335~DNA replication-dependent nucleosome assembly	10	0.700771	0.000259538	HIST2H3B, HIST2H4, HIST1H3G, HIST2H3C2, HIST1H3H, HIST2H3C1, HIST1H3I, HIST1H3B, HIST1H3D, HIST1H3E	1229	33	18082
GOTERM_BP_DIRECT	GO:0042632~cholesterol homeostasis	14	0.981079	0.000263893	ABCA2, ABCG8, MYLIP, ABCG5, NR1H2, PCSK9, LPL, APOA4, TMEM97, CYP7A1, CD24A, FABP4, SOAT1, LIPG	1229	63	18082
GOTERM_BP_DIRECT	GO:0006915~apoptotic process	62	4.34478	0.000275883	APP, 1810011O10RIK, NCF1, SH3KBP1, GPR65, PCSK9, BUB1B, LSP1, SHB, IFIT2, TCTN3, FASTK, RFK, CASP1, DPF2, AKT1, SRGN, SH3GLB1, DAXX, RIPK2, PRKCB, SHISA5, IRAK3, PRKCA, DYNLL1, TMEM173, TGFBR2, NAIP5, AIM2, TRAF4, NAIP7, NAIP6, IRF1, ELMO1, BTK, PPIF, SGK1, NAIP1, EPHA2, BIRC3, PPARD, CD5L, NOD1, ERBB4, INPP5D, EPB41L3, HMOX1, BAK1, GSN, STAT1, GZMA, TRPV2, SERPINA3G, PML, NFKB1, TPX2, DAP, STK17…	1229	570	18082
GOTERM_BP_DIRECT	GO:0050766~positive regulation of phagocytosis	12	0.840925	0.00029658	FCGR1, FCGR3, FCER1G, IL1B, SLC11A1, SIRPA, CYBA, CD36, DOCK2, FCGR2B, MFGE8, MBL2	1229	48	18082
GOTERM_BP_DIRECT	GO:0007166~cell surface receptor signaling pathway	30	2.10231	0.000424453	CD274, PIK3CD, ITGAL, CXCL13, CBL, ADGRG3, ADGRE1, CD79B, CD79A, CYSLTR1, ADGRE5, ADGRE4, BTLA, CD37, CD36, CLEC1B, CD53, FCER1G, SYK, FZD8, OSMR, JMJD6, FCGR1, CD24A, TSPAN15, FCGR3, COL4A3, ADGRL4, FCGR2B, CD22	1229	219	18082
GOTERM_BP_DIRECT	GO:0042060~wound healing	17	1.19131	0.000554768	TGFB1, SPARC, SLC11A1, TPM1, FN1, ADRB2, TGFBR2, MMP12, CNN2, COL3A1, FCGR4, MUSTN1, PECAM1, TFF3, HPSE, ITGA9, PPARD	1229	94	18082
GOTERM_BP_DIRECT	GO:0007010~cytoskeleton organization	18	1.26139	0.000612756	CCL24, TAGLN, DST, SH3KBP1, LSP1, CNN2, HCK, FMNL1, PCLO, DPYSL2, EPB41L3, CCL3, AKT1, SIRPA, TNIK, DOCK2, AJUBA, YWHAH	1229	104	18082
GOTERM_BP_DIRECT	GO:0045730~respiratory burst	5	0.350385	0.00062736	CD24A, NCF1, SLC11A1, CYBB, CYBA	1229	7	18082
GOTERM_BP_DIRECT	GO:0007565~female pregnancy	15	1.05116	0.00103071	STAT5A, STAT5B, SLC38A1, TGFB1, AKR1C18, ADM, ETS1, MUC1, SULT1E1, NAMPT, UCP2, CD38, UPRT, LGALS9, SLC38A2	1229	81	18082
GOTERM_BP_DIRECT	GO:0051290~protein heterotetramerization	11	0.770848	0.00103121	HIST2H3B, RRM2, HIST2H4, HIST1H3G, HIST2H3C2, HIST1H3H, HIST2H3C1, HIST1H3I, HIST1H3B, HIST1H3D, HIST1H3E	1229	47	18082
GOTERM_BP_DIRECT	GO:0007249~I-kappaB kinase/NF-kappaB signaling	9	0.630694	0.00107051	TIFAB, RIPK3, RIPK2, IRF1, BCL3, REL, BTK, TLR8, NFKB1	1229	32	18082
GOTERM_BP_DIRECT	GO:0050702~interleukin-1 beta secretion	5	0.350385	0.00118724	GBP5, AIM2, CD36, TLR6, TLR4	1229	8	18082
GOTERM_BP_DIRECT	GO:0007229~integrin-mediated signaling pathway	16	1.12123	0.0014408	FCER1G, ITGAM, SYK, ITGA4, PLEK, ITGA1, ITGB2, CIB2, ITGAL, VAV1, ADAM17, COL3A1, TYROBP, ITGA6, ITGA9, FERMT3	1229	93	18082
GOTERM_BP_DIRECT	GO:0032722~positive regulation of chemokine production	7	0.49054	0.00164191	ADAM17, RIPK2, EIF2AK2, TLR7, LGALS9, TLR4, TLR3	1229	20	18082
GOTERM_BP_DIRECT	GO:0006909~phagocytosis	11	0.770848	0.0023143	HCK, AXL, SLC11A1, ITGB2, PECAM1, ELMO1, LEPR, PLD4, ITGAL, VAV1, MYO1G	1229	52	18082
GOTERM_BP_DIRECT	GO:0051923~sulfation	5	0.350385	0.00319026	SULT1A1, SULT1C2, SULT1D1, SULT1E1, SULT2A1	1229	10	18082
GOTERM_BP_DIRECT	GO:0071404~cellular response to low-density lipoprotein particle stimulus	5	0.350385	0.00319026	FCER1G, SYK, ITGB2, CD36, FGF21	1229	10	18082
GOTERM_BP_DIRECT	GO:0019373~epoxygenase P450 pathway	8	0.560617	0.00334178	CYP2A4, CYP2A12, CYP2A22, CYP2C40, CYP2C70, CYP2G1, CYP2C39, CYP2C38	1229	30	18082
GOTERM_BP_DIRECT	GO:0010033~response to organic substance	12	0.840925	0.00408105	P2RX7, SQLE, GATM, ASAH1, TGFB1, UGT1A1, ANXA5, BTK, AKT1, PLA2G4A, AKR1B3, CTSC	1229	65	18082
GOTERM_BP_DIRECT	GO:0010744~positive regulation of macrophage derived foam cell differentiation	5	0.350385	0.00474566	MSR1, PRKCH, CSF1, LPL, CD36	1229	11	18082
GOTERM_BP_DIRECT	GO:0031953~negative regulation of protein autophosphorylation	5	0.350385	0.00474566	NLRP12, PTPRC, ENPP1, GFRA2, ENG	1229	11	18082
GOTERM_BP_DIRECT	GO:0045453~bone resorption	7	0.49054	0.00560337	IL7, RAC2, CTNNB1, ACP5, ADRB2, CBL, CTSS	1229	25	18082
GOTERM_BP_DIRECT	GO:0001570~vasculogenesis	12	0.840925	0.00580769	TGFBR3, NTRK2, TGFB1, ANGPT1, TIPARP, HEG1, CTNNB1, ADM, FOXM1, TGFBR2, EPHA2, ENG	1229	68	18082
GOTERM_BP_DIRECT	GO:0006103~2-oxoglutarate metabolic process	6	0.420463	0.00582398	STAT5A, STAT5B, GOT1, MRPS36, GPT2, IDH3A	1229	18	18082
GOTERM_BP_DIRECT	GO:0070542~response to fatty acid	6	0.420463	0.00746871	INSIG2, UCP2, TBXAS1, SCD2, CD36, TLR4	1229	19	18082
GOTERM_BP_DIRECT	GO:0051085~chaperone mediated protein folding requiring cofactor	5	0.350385	0.00921781	CD74, H2-DMB2, TOR1A, H2-DMA, H2-DMB1	1229	13	18082
GOTERM_BP_DIRECT	GO:0019433~triglyceride catabolic process	6	0.420463	0.00941098	PNPLA3, LPL, APOA4, PRKACB, MGLL, PNPLA2	1229	20	18082
GOTERM_BP_DIRECT	GO:0033344~cholesterol efflux	7	0.49054	0.0100165	ABCA2, ABCG8, ABCG5, APOM, SOAT1, APOF, APOA4	1229	28	18082
GOTERM_BP_DIRECT	GO:0006468~protein phosphorylation	55	3.85424	0.0100909	APP, BUB1B, PIK3CG, HK1, STK10, CCND1, FASTK, AKT3, PBK, TRIM24, AKT1, PRKACB, PRKCH, RIPK3, SYK, RIPK2, PRKCB, IRAK3, PRKCA, TGFBR2, HCK, BTK, ULK2, SIK1, PRKD2, ULK1, TNIK, SGK1, EPHA3, EPHA2, DDR2, CSF1R, PXK, RNASEL, NPR2, CBL, CAMKK2, CCNB1, ERBB4, RPS6KC1, CCL3, MAPK6, NTRK2, TGFB1, DMPK, PLK1, EIF2AK2, P2RX7, ICK, SNRK, SBK1, AXL, STK17B, MAP3K13, CDK16	1229	576	18082
GOTERM_BP_DIRECT	GO:0007264~small GTPase mediated signal transduction	27	1.89208	0.0101574	RAB5C, DOCK8, ARHGAP1, AGAP2, RASGRP2, RASGRP1, RAB43, DOCK10, DOCK11, G3BP2, RAC2, RAC3, HMOX1, RAB8B, RAB4B, RHOG, RHOC, VAV1, VAV2, RAB31, ARHGAP30, RAB12, RAB34, RGL1, DOCK2, ARHGEF7, RAB7B	1229	236	18082
GOTERM_BP_DIRECT	GO:0046777~protein autophosphorylation	22	1.5417	0.0127634	NTRK2, CSF1R, SYK, RIPK3, EIF2AK2, IRAK3, PRKCA, HK1, CAMKK2, STK10, HCK, ERBB4, STK17B, BTK, TRIM24, ULK2, ULK1, PRKD2, SIK1, TNIK, MAP3K13, DDR2	1229	183	18082
GOTERM_BP_DIRECT	GO:0033630~positive regulation of cell adhesion mediated by integrin	5	0.350385	0.0157852	CD24A, SYK, RAC3, PTPN6, NCKAP1L	1229	15	18082
GOTERM_BP_DIRECT	GO:0031529~ruffle organization	5	0.350385	0.0199381	CSF1R, PLEKHA1, PLEK, TPM1, LPIN1	1229	16	18082
GOTERM_BP_DIRECT	GO:0034394~protein localization to cell surface	6	0.420463	0.0206033	MRAP, ANGPT1, FLNA, CTNNB1, SLC28A2, FBLN5	1229	24	18082
GOTERM_BP_DIRECT	GO:0008152~metabolic process	44	3.08339	0.0230829	UGT1A10, PYGB, ACSS3, PFKFB4, ACSS2, MVK, ACSM2, LYZ2, HEXB, LYZ1, PDHB, SAMHD1, GBA2, UGT1A7C, ACACA, PAPSS2, AACS, HK1, OXCT1, ENPP1, UGT1A2, UGT1A9, NADK, FDFT1, GCH1, UGT1A1, HMGCS1, BCKDHB, PLA2G4A, ACSL3, UGT1A6A, UGT1A6B, PM20D1, UCK1, PKM, MAN2B2, FASN, LPCAT2, PNPLA3, CIAPIN1, ACO2, PFKP, PNPLA2, GNE	1229	463	18082
GOTERM_BP_DIRECT	GO:0019835~cytolysis	6	0.420463	0.0243533	P2RX7, LYZ2, GZMA, LYZ1, MMD2, BAK1	1229	25	18082
GOTERM_BP_DIRECT	GO:0018107~peptidyl-threonine phosphorylation	8	0.560617	0.024601	SBK1, AKT3, PBK, BCL2, AKT1, PRKCA, TGFBR2, HK1	1229	43	18082
GOTERM_BP_DIRECT	GO:0050873~brown fat cell differentiation	7	0.49054	0.0253161	PLAC8, MRAP, CEBPB, RGS2, FABP4, ITGA6, ADRB2	1229	34	18082
GOTERM_BP_DIRECT	GO:0001503~ossification	13	0.911002	0.0290587	GDF10, SPARC, RSAD2, CBFB, CSF1, SORT1, NPR2, CHRDL2, BMP7, MGP, BCL2, TAPT1, DDR2	1229	96	18082
GOTERM_BP_DIRECT	GO:0050892~intestinal absorption	5	0.350385	0.0300972	SLCO1A5, SLC5A1, CD36, ABCB1A, SLC26A6	1229	18	18082
GOTERM_BP_DIRECT	GO:0006801~superoxide metabolic process	5	0.350385	0.0361314	SH3PXD2A, NCF2, CYBB, CYBA, SOD3	1229	19	18082
GOTERM_BP_DIRECT	GO:0043252~sodium-independent organic anion transport	6	0.420463	0.038119	SLC22A26, SLCO3A1, SLC22A27, SLCO1A4, SLC22A29, SLCO1A5	1229	28	18082
GOTERM_BP_DIRECT	GO:0043491~protein kinase B signaling	7	0.49054	0.0413653	P2RY12, TGFB1, AXL, IL1B, CCL3, AKT1, EPHA2	1229	38	18082
GOTERM_BP_DIRECT	GO:0072593~reactive oxygen species metabolic process	7	0.49054	0.0413653	P2RX7, SH3PXD2A, RFK, ATPIF1, BCL2, CYBA, VAV1	1229	38	18082
GOTERM_BP_DIRECT	GO:0006814~sodium ion transport	15	1.05116	0.0418286	SLC22A4, SLC34A2, SLC13A3, SLC38A1, SLC20A1, SLC23A1, ATP1B3, SLC5A1, ATP1B1, SLC9A7, SLC9A9, SLC13A5, SLC38A2, SLC17A3, SLC17A4	1229	124	18082
GOTERM_BP_DIRECT	GO:0009116~nucleoside metabolic process	5	0.350385	0.0428115	MTAP, PNP, PNP2, UPRT, UPP2	1229	20	18082
GOTERM_BP_DIRECT	GO:0030199~collagen fibril organization	7	0.49054	0.0461882	ADAMTS2, COL3A1, TNXB, LUM, DPT, LOXL2, DDR2	1229	39	18082
GOTERM_BP_DIRECT	GO:0007568~aging	19	1.33146	0.0467921	CD86, GSN, TGFB1, VCAM1, IL15, ITGB2, ADM, HMGCR, PPP1R9B, TGFBR2, COL3A1, UCP2, FBXO4, AKT1, SCAP, BAK1, IFI27L2A, CTSC, FADS1	1229	173	18082

## Sheet: Sheet 4
Category	Term	Count	%	PValue	Genes	List Total	Pop Hits	Pop Total
GOTERM_BP_DIRECT	GO:0008152~metabolic process	83	8.85806	5.2e-27	ALAS2, SLC27A1, ACAA2, ACSM3, ECI1, ECI2, HEXA, ACSM5, FTCD, DHTKD1, ALAD, GYS2, 6430573F11RIK, SCP2, AUH, HYAL1, HYAL2, HYAL3, ENPP2, UGT2A3, ENPP3, ACADM, ACADS, ENPP5, ACAD8, ARSA, ACSL1, ECH1, UPB1, HADHB, UGDH, ALDH5A1, ACOX2, ACOX1, ALDH1A1, UGT2B5, SUCLG2, DNA2, FBP1, ASPA, ALDH7A1, ALDH9A1, GCDH, ECHS1, H6PD, PCX, GSTP2, GSTP1, IREB2, ACAA1B, ACAA1A, TYMP, SRR, UGP2, GM3776, GPAT4, ISOC1,…	822	463	18082
GOTERM_BP_DIRECT	GO:0006631~fatty acid metabolic process	31	3.30843	1.56e-11	CYP4A12A, SLC27A1, ECHS1, ACAA2, ACSM3, ECI1, ACAA1B, ACSM5, CROT, ACAA1A, ADIPOR2, GHR, LIPC, FAM213B, FADS6, GPAT4, ACADM, ACADS, DECR1, CYB5A, ACSL1, CYP4A10, ELOVL3, ECH1, ACADSB, HADHB, FABP2, AMACR, ACOX2, ACOX1, ECHDC2	822	156	18082
GOTERM_BP_DIRECT	GO:0006749~glutathione metabolic process	17	1.8143	2.31e-10	GSTM4, GGT6, GSTM1, GSTP2, GLO1, GSTP1, GSR, GSTT2, OPLAH, GCLC, NAT8, ALDH5A1, GSTA4, GSTA2, GSTA1, HAGH, GCLM	822	49	18082
GOTERM_BP_DIRECT	GO:0006629~lipid metabolic process	51	5.4429	9.49e-09	SLC27A1, GAL3ST1, ACAA2, ACSM3, ECI1, GDE1, ACSM5, CROT, LIPC, FADS6, ENPP2, ACADM, ACADS, SREBF1, PLA2G12A, IAH1, ACSL1, ELOVL3, ECH1, HADHB, ACOX2, ACOX1, SOAT2, FDX1, ANGPTL8, PLBD2, ECHS1, PCX, ACAA1B, HSD17B6, SGMS2, ACAA1A, HSD17B11, ADIPOR2, HMGCL, FAM213B, AWAT2, GPAT4, PLCG1, DECR1, CHKB, CHKA, EPHX2, ACADSB, PRDX6, SULT1B1, ETNK2, ETNK1, CYP1A2, ECHDC2, CHPT1	822	459	18082
GOTERM_BP_DIRECT	GO:0051289~protein homotetramerization	17	1.8143	1.6e-07	CRTC3, DPYS, DCXR, HPRT, APOA1BP, CRYZ, GNMT, SRR, ALDH5A1, PPAT, ALDH1A1, ALDOC, ACADM, FBP1, ACADS, MBL1, DECR1	822	74	18082
GOTERM_BP_DIRECT	GO:0050873~brown fat cell differentiation	10	1.06724	1.48e-05	SELENBP1, CEBPA, ARL4A, ALDH6A1, NUDT7, LRG1, ADRB3, LAMB3, BNIP3, PPARG	822	34	18082
GOTERM_BP_DIRECT	GO:0005975~carbohydrate metabolic process	24	2.56137	6.49e-05	H6PD, PKLR, AI464131, GLO1, DCXR, HEXA, UGDH, PPP1R3C, HYAL1, HYAL2, STBD1, AMDHD2, HYAL3, GPD1, PDK4, PGM2, GALM, HAGH, SIAE, FBP1, PDK2, XYLB, GALK1, PDK1	822	206	18082
GOTERM_BP_DIRECT	GO:0032869~cellular response to insulin stimulus	14	1.49413	0.000163	ERRFI1, PKLR, GSTP1, SORBS1, ZFP36L1, APRT, GHR, GCLC, EEF2K, PPAT, PPARG, SLC25A33, VAMP2, WDTC1	822	88	18082
GOTERM_BP_DIRECT	GO:0052696~flavonoid glucuronidation	7	0.747065	0.00026	UGT2B36, UGT2B1, UGT2B35, UGT2B38, UGT2B5, UGT2A3, UGT3A1	822	21	18082
GOTERM_BP_DIRECT	GO:0055088~lipid homeostasis	9	0.960512	0.000439	ACAD8, GCDH, CEBPA, ACOX2, ACOX1, ACADM, ACADS, ACADSB, ASGR2	822	41	18082
GOTERM_BP_DIRECT	GO:0035634~response to stilbenoid	7	0.747065	0.000725	GM10681, HSD3B4, HSD3B5, SLCO1A1, GSTA2, GSTA1, MUP3	822	25	18082
GOTERM_BP_DIRECT	GO:0001889~liver development	13	1.38741	0.00121306	CEBPA, SMAD3, AK4, UPB1, IGF2R, HMGCL, HHEX, PROC, SLCO2B1, SLCO1B2, ACADM, ATG7, SEC63	822	95	18082
GOTERM_BP_DIRECT	GO:0043252~sodium-independent organic anion transport	7	0.747065	0.00137347	SLC22A28, SLCO2B1, SLCO1A1, SLCO1B2, SLCO2A1, GM6614, SLC22A30	822	28	18082
GOTERM_BP_DIRECT	GO:0042594~response to starvation	8	0.853789	0.00142641	HMGCL, ZFP36, PDK4, ADSSL1, PPARG, ACADM, SSTR2, ATG7	822	38	18082
GOTERM_BP_DIRECT	GO:0007568~aging	18	1.92102	0.00230787	SREBF1, LRP1, GSS, MBD1, MBD2, PEBP1, SIRT3, SRR, GCLC, ADRB3, SCP2, P2RY1, RGN, LONP1, SERPING1, NOX4, ALDOC, GCLM	822	173	18082
GOTERM_BP_DIRECT	GO:0006730~one-carbon metabolic process	7	0.747065	0.00239063	DHFR, CAR3, AHCYL2, CAR1, CAR8, CAR5A, GNMT	822	31	18082
GOTERM_BP_DIRECT	GO:0055085~transmembrane transport	30	3.20171	0.0024785	ABCB6, SLC43A1, SLC2A2, SLC30A10, SLC2A5, CLCN2, SLC22A15, SLC22A18, SLC16A7, MFSD1, SLC26A11, SLC17A8, SLC26A10, SLC22A30, SLC25A22, GPR155, SLC17A2, SLC39A4, ABCC3, SLC13A2, SLC30A3, ABCA8A, SLC30A5, SLC39A11, SLC39A14, MFSD7C, ABCB10, SFXN5, SLC25A13, ABCG2	822	364	18082
GOTERM_BP_DIRECT	GO:0006006~glucose metabolic process	10	1.06724	0.00350137	ALDH5A1, H6PD, DCXR, ANGPTL8, PDK4, PGM2, GALM, PDK2, PDK1, WDTC1	822	68	18082
GOTERM_BP_DIRECT	GO:0009611~response to wounding	9	0.960512	0.0044762	ZFP36, HHEX, SERPINE2, PLLP, SLC1A2, PEBP1, ZFP36L2, ZFP36L1, SULF2	822	58	18082
GOTERM_BP_DIRECT	GO:0006869~lipid transport	13	1.38741	0.0045347	OSBPL8, APOL7A, SLC27A1, ABCA8A, TMEM30B, ABCA8B, ATP8B1, PCTP, ATP11A, APOA5, SCP2, APOC1, MFSD2A	822	111	18082
GOTERM_BP_DIRECT	GO:0006829~zinc II ion transport	6	0.640342	0.00566038	SLC30A3, SLC30A5, SLC39A11, SLC30A10, SLC39A14, SLC39A4	822	26	18082
GOTERM_BP_DIRECT	GO:0045600~positive regulation of fat cell differentiation	8	0.853789	0.00630957	CEBPA, ZFP36, ZBTB16, ID2, PPARG, CREBL2, ZFP36L1, ZBTB7C	822	49	18082
GOTERM_BP_DIRECT	GO:0017144~drug metabolic process	5	0.533618	0.0077536	CYP2D22, CYP2B10, CYP1A2, CYP2E1, FMO5	822	18	18082
GOTERM_BP_DIRECT	GO:0046686~response to cadmium ion	6	0.640342	0.00913597	ALAD, CYB5A, GCLC, GSS, HAAO, SORD	822	29	18082
GOTERM_BP_DIRECT	GO:0042493~response to drug	26	2.77481	0.0121447	COL18A1, FECH, SLC1A2, PEBP1, AK4, CROT, COMT, SERPINA7, ALAD, SRR, LGALS1, MYO6, GNA12, PMS1, MAP2K6, SREBF1, ACSL1, BDNF, SORD, INHBA, CYP2D26, DPYD, ALDH1A1, PPARG, CYP2E1, GCLM	822	339	18082
GOTERM_BP_DIRECT	GO:0035690~cellular response to drug	9	0.960512	0.0201703	GSTM3, DDC, RAP2A, GSTM1, PPAT, ADSSL1, GAS6, FBP1, EGFR	822	75	18082
GOTERM_BP_DIRECT	GO:0007005~mitochondrion organization	9	0.960512	0.0304267	RAB32, HMGCL, CEBPA, EPAS1, PEX5, LONP1, PARK7, ATG7, SLC25A33	822	81	18082
GOTERM_BP_DIRECT	GO:0006979~response to oxidative stress	12	1.28068	0.0398032	ALAD, CAR3, GCLC, 1600014C10RIK, EPAS1, GPX6, ALDH1A1, PEBP1, HAO1, PARK7, GCLM, EGFR	822	133	18082
GOTERM_BP_DIRECT	GO:0010466~negative regulation of peptidase activity	11	1.17396	0.0402195	SERPINA11, ITIH3, SERPINE2, MUG1, MUG2, SPINK12, SERPING1, PEBP1, BC048546, SPINT2, SERPINA1E	822	117	18082
