# Supplementary material for: Rewiring of liver diurnal transcriptome rhythms by triiodothyronine (T3) supplementation
Source: eLife. 2022 Jul 27;11:e79405. doi: 10.7554/eLife.79405 (PMC9391036; doi:10.7554/eLife.79405)
Supplement: Supplementary file 4. [file elife-79405-supp4.xlsx]

## Sheet: Summary
Supplementary Table S4. Differentially Expressed Genes (DEGs) per ZT
Sheet 1 - DEGs at ZT2
Sheet 2 - DEGs at ZT6
Sheet 3 - DEGs at ZT10
Sheet 4 - DEGs at ZT14
Sheet 5 - DEGs at ZT18
Sheet 6 - DEGs at ZT22
Sheet 7 - Time of day independent DEGs
Sheet 8 - Correlation of T3 levels with time of day independent DEGs
Sheet 9 - GSEA of time of day independent DEGs

## Sheet: Sheet 1
ID	Gene.Symbol	Fold Change	p value (FDR)	p value	Significance	Status
TC1900001612.mm.2	Cyp17a1	11.4	3.92284e-05	3.07368e-09	TRUE	UP
TC1500001736.mm.2	9030619P08Rik	8.33	0.000434174	1.50126e-07	TRUE	UP
TC0400003219.mm.2	Dio1	3.9025	0.000434174	2.70139e-07	TRUE	UP
TC1300001377.mm.2	Akr1c18	12.31	0.000434174	2.7373e-07	TRUE	UP
TC0600000362.mm.2	Trim24	5.0225	0.000507347	3.88404e-07	TRUE	UP
TC1700000836.mm.2	Cyp39a1	2.865	0.000511427	4.14559e-07	TRUE	UP
TC0300001446.mm.2	Gbp3	5.365	0.00101768	1.05407e-06	TRUE	UP
TC0500003745.mm.2	Cyp3a41a	8.405	0.00108781	1.22468e-06	TRUE	UP
TC1200002506.mm.2	Dnah11	5.715	0.00149761	1.88836e-06	TRUE	UP
TC1000000030.mm.2	Esr1	2.6475	0.00152011	1.99955e-06	TRUE	UP
TC1900000455.mm.2	Mbl2	1.49	0.00154556	2.15764e-06	TRUE	UP
TC1000001701.mm.2	Ginm1	1.9275	0.00180607	2.8797e-06	TRUE	UP
TC1900001057.mm.2	Slc22a27	8.7825	0.00180607	3.03046e-06	TRUE	UP
TC1100004270.mm.2	Tlcd2	2.645	0.00180607	3.16097e-06	TRUE	UP
TC1000003226.mm.2	Gstt3	4.2975	0.00180607	3.23082e-06	TRUE	UP
TC1900000225.mm.2	Ms4a6b	1.88	0.00180607	3.2533e-06	TRUE	UP
TC0500003596.mm.2	Cyp3a16	11.875	0.0018972	3.7592e-06	TRUE	UP
TC0900001128.mm.2	Nt5e	4.635	0.0019312	4.00051e-06	TRUE	UP
TC1500000782.mm.2	Pnpla3	7.105	0.00193195	4.17606e-06	TRUE	UP
TC0900001726.mm.2	Cep126	7.35	0.00205933	4.54415e-06	TRUE	UP
TC0500002415.mm.2	Sepsecs	1.485	0.00233145	5.3546e-06	TRUE	UP
TC1700002780.mm.2	H2-DMb1	1.6975	0.00238425	5.58323e-06	TRUE	UP
TC1200000225.mm.2	Cmpk2	2.4225	0.00245858	5.86799e-06	TRUE	UP
TC0500000536.mm.2	Slc34a2	5.1675	0.0027766	6.87709e-06	TRUE	UP
TC0500003599.mm.2	Cyp3a44	4.83	0.00286137	7.21591e-06	TRUE	UP
TC1900001767.mm.2	Slc22a29	3.2175	0.00302238	8.03028e-06	TRUE	UP
TC0200005317.mm.2	Slmo2	2.4625	0.00311418	8.41443e-06	TRUE	UP
TC0900002780.mm.2	Me1	3.0675	0.00363817	1.02432e-05	TRUE	UP
TC1900000317.mm.2	Rfk	2.22	0.00363817	1.03218e-05	TRUE	UP
TC0300001445.mm.2	Gbp7	2.8425	0.00377783	1.11917e-05	TRUE	UP
TC1400001906.mm.2	Ddhd1; Mir5131	3.05	0.00377783	1.13985e-05	TRUE	UP
TC1700002692.mm.2	Calm2	0.895	0.00379572	1.17943e-05	TRUE	UP
TC0400000720.mm.2	Orm3	3.9325	0.00445736	1.46531e-05	TRUE	UP
TC0800003069.mm.2	Mvd	3.94	0.00451422	1.52466e-05	TRUE	UP
TC1900001123.mm.2	AW112010	2.0975	0.00460078	1.58209e-05	TRUE	UP
TC1800000625.mm.2	Csf1r	1.73	0.00460078	1.59533e-05	TRUE	UP
TC1100001070.mm.2	Rilp	0.8975	0.00466352	1.71346e-05	TRUE	UP
TC1900000467.mm.2	Papss2	3.37	0.00481614	1.84352e-05	TRUE	UP
TC0700000446.mm.2	Cyp2a12	1.615	0.00490607	1.90003e-05	TRUE	UP
TC0500002745.mm.2	G3bp2	1.415	0.00557597	2.25992e-05	TRUE	UP
TC1000000744.mm.2	Lss	3.89	0.00644249	2.83883e-05	TRUE	UP
TC1500001728.mm.2	Ly6a	4.5375	0.00696488	3.16785e-05	TRUE	UP
TC1400001436.mm.2	Pdhb	1.07	0.0072837	3.41126e-05	TRUE	UP
TC0900000560.mm.2	Apoa4	4.045	0.00732532	3.56248e-05	TRUE	UP
TC1500002327.mm.2	Prlr	2.725	0.00732532	3.64125e-05	TRUE	UP
TC1100002233.mm.2	Cobl	1.2825	0.00732532	3.64843e-05	TRUE	UP
TC0100002314.mm.2	Gls	0.795	0.00732532	3.66428e-05	TRUE	UP
TC1000002383.mm.2	Gstt1	2.695	0.00732532	3.69585e-05	TRUE	UP
TC0300002334.mm.2	Fdps	2.84	0.00732532	3.75252e-05	TRUE	UP
TC0600003329.mm.2	Plbd1	1.825	0.00732532	3.79362e-05	TRUE	UP
TC0900000659.mm.2	Idh3a	3.23	0.00785238	4.17266e-05	TRUE	UP
TC0500003532.mm.2	Mmd2	6.5	0.00792189	4.24935e-05	TRUE	UP
TC0300001306.mm.2	Elovl6	4.08	0.0083665	4.63424e-05	TRUE	UP
TC0100000847.mm.2	Spp2	2.3475	0.00844313	4.75273e-05	TRUE	UP
TC1800001175.mm.2	Slc23a1	2.5375	0.00860191	4.88084e-05	TRUE	UP
TC0500001894.mm.2	Cyp51	3.2175	0.00892482	5.10426e-05	TRUE	UP
TC0800001202.mm.2	Ces4a	7.4	0.00904615	5.21439e-05	TRUE	UP
TC1100001276.mm.2	Acaca	2.5675	0.00919121	5.39854e-05	TRUE	UP
TC0400003208.mm.2	Acot11	2.0825	0.00932219	5.57144e-05	TRUE	UP
TC0700001756.mm.2	Prkcb	1.0525	0.00956355	5.77103e-05	TRUE	UP
TC0400002216.mm.2	Pdp1	3.815	0.00970085	5.98494e-05	TRUE	UP
TC0200003630.mm.2	Ifih1	2.365	0.0097239	6.04295e-05	TRUE	UP
TC0300001137.mm.2	Sort1	1.6025	0.0098315	6.15409e-05	TRUE	UP
TC1600001639.mm.2	Gramd1c	1.9475	0.00995777	6.31436e-05	TRUE	UP
TC1100003399.mm.2	Ccl6	3.0275	0.00995777	6.36766e-05	TRUE	UP
TC1300002517.mm.2	Ptcd2	0.7825	0.0104127	6.75237e-05	TRUE	UP
TC0400003794.mm.2	C1qa	1.9075	0.0107988	7.44042e-05	TRUE	UP
TC1900000987.mm.2	Frmd8	2.43	0.0108004	7.5169e-05	TRUE	UP
TC0400001555.mm.2	Sdc3	2.5	0.0123183	9.20848e-05	TRUE	UP
TC0400002849.mm.2	Megf9	1.105	0.0132018	0.000103538	TRUE	UP
TC1100002643.mm.2	Gm12185; Tgtp1	3.0575	0.013869	0.000113435	TRUE	UP
TC1200001296.mm.2	Zfp386	1.21	0.0139223	0.000115899	TRUE	UP
TC1700001194.mm.2	Qpct	2.1825	0.0139223	0.000115988	TRUE	UP
TC0600002121.mm.2	Slc37a3	2.345	0.0143489	0.000121481	TRUE	UP
TC0X00001024.mm.2	Chic1	3.6775	0.015776	0.000137114	TRUE	UP
TC0600002323.mm.2	Nod1	1.2025	0.0159879	0.000139677	TRUE	UP
TC0200003698.mm.2	Abcb11	0.6775	0.0161744	0.000142052	TRUE	UP
TC1400002215.mm.2	Fdft1	2.84	0.0170934	0.000153231	TRUE	UP
TC1400000292.mm.2	Lrtm1	3.6475	0.0170934	0.000154723	TRUE	UP
TC0100000836.mm.2	Ugt1a2; Ugt1a6a; Ugt1a6b; Ugt1a10; Ugt1a7c; Ugt1a5; Ugt1a9; Ugt1a1	1.0325	0.0176317	0.000163687	TRUE	UP
TC0600001371.mm.2	Slc6a12	2.9075	0.0176317	0.000165212	TRUE	UP
TC0100001365.mm.2	Colgalt2	2.89	0.0176317	0.000165865	TRUE	UP
TC1400002280.mm.2	Dpysl2	1.1575	0.0176317	0.000165947	TRUE	UP
TC0100002544.mm.2	Fn1	1.3275	0.0176378	0.000166799	TRUE	UP
TC0X00003360.mm.2	Tlr7	2.62	0.0177532	0.00016869	TRUE	UP
TC1200002269.mm.2	Ifi27l2a	1.725	0.0180282	0.000172926	TRUE	UP
TC1700002573.mm.2	Atl2	1.2475	0.018419	0.000179676	TRUE	UP
TC1900001482.mm.2	Cyp2c70	2.015	0.018419	0.000180115	TRUE	UP
TC0100000682.mm.2	Utp14b; Acsl3	2.8475	0.0185179	0.000183175	TRUE	UP
TC0500000547.mm.2	Stim2	3.2725	0.0185179	0.000183461	TRUE	UP
TC0100000372.mm.2	Sdpr	1.9925	0.0185318	0.000184433	TRUE	UP
TC0400003675.mm.2	Atpif1	1.6675	0.0186558	0.000188861	TRUE	UP
TC0200002367.mm.2	Acss2	2.68	0.0187294	0.000190618	TRUE	UP
TC0700004610.mm.2	Ccnd1; Mir3962	2.655	0.019026	0.000194786	TRUE	UP
TC0500003399.mm.2	Ccl24	1.7	0.019026	0.000195521	TRUE	UP
TC0700004291.mm.2	Sult1a1	2.5525	0.019026	0.000196801	TRUE	UP
TC0700000236.mm.2	Slc1a5	1.585	0.019026	0.000197133	TRUE	UP
TC0200000868.mm.2	Gpd2	2.7225	0.019026	0.00019851	TRUE	UP
TC0900001232.mm.2	Rbp1	2.9875	0.019026	0.000198776	TRUE	UP
TC0500003744.mm.2	Cyp3a41b	4.3325	0.0190751	0.000200148	TRUE	UP
TC1500001606.mm.2	Fam84b	2.1825	0.0192032	0.000207603	TRUE	UP
TC1600000489.mm.2	Hacd2	1.3775	0.0192032	0.000208537	TRUE	UP
TC0300003077.mm.2	Sh3glb1	0.5975	0.0192032	0.000215357	TRUE	UP
TC0200005184.mm.2	Ptgis	1.7225	0.0192032	0.000216849	TRUE	UP
TC0500003463.mm.2	Pilra	1.715	0.0192032	0.000217058	TRUE	UP
TC1200001272.mm.2	Pld4	2.0075	0.0202853	0.000233858	TRUE	UP
TC1700002791.mm.2	H2-Q1	2.4175	0.020664	0.000240085	TRUE	UP
TC0500002068.mm.2	Fam126a	1.31	0.0208005	0.000245192	TRUE	UP
TC0500002694.mm.2	Ugt2b37	5.475	0.0210677	0.000252034	TRUE	UP
TC1100004233.mm.2	Fasn	3.8425	0.0215878	0.000259567	TRUE	UP
TC0200003601.mm.2	Ly75	1.54	0.0218423	0.000263611	TRUE	UP
TC1200001686.mm.2	Stxbp6	1.1075	0.0221518	0.000269341	TRUE	UP
TC0700003764.mm.2	Thrsp	4.93	0.0233739	0.000287358	TRUE	UP
TC1700002175.mm.2	Slc22a7	6.8475	0.0234011	0.000289801	TRUE	UP
TC1700002812.mm.2	Egfl8	0.6625	0.0234444	0.000292372	TRUE	UP
TC1700000085.mm.2	Mpc1	1.2225	0.0238557	0.000300801	TRUE	UP
TC1900001484.mm.2	Pdlim1	1.8825	0.0239543	0.000304952	TRUE	UP
TC0700002102.mm.2	Dhcr7	2.7	0.0243038	0.000316302	TRUE	UP
TC1200000460.mm.2	Srp54b	1.0825	0.0243352	0.000318903	TRUE	UP
TC0100000375.mm.2	Stat1	1.63	0.0244176	0.000321125	TRUE	UP
TC1600001556.mm.2	Parp14	1.7825	0.0244176	0.000322508	TRUE	UP
TC1400001070.mm.2	Tsc22d1	1.635	0.0244176	0.000323281	TRUE	UP
TC1300000919.mm.2	Glrx	1.7775	0.025501	0.000345663	TRUE	UP
TC0X00002453.mm.2	G6pdx	2.555	0.0262449	0.000359292	TRUE	UP
TC1300000278.mm.2	BC005537	0.79	0.0262464	0.000360494	TRUE	UP
TC1500000432.mm.2	Sqle	3.3075	0.0271623	0.000375521	TRUE	UP
TC0500002219.mm.2	Letm1	1.2625	0.0273591	0.000385864	TRUE	UP
TC0600000359.mm.2	Akr1d1	1.8475	0.0273591	0.000386867	TRUE	UP
TC0500002755.mm.2	Cxcl9	2.58	0.027664	0.000394915	TRUE	UP
TC0X00003358.mm.2	Tmsb4x	1.905	0.0285412	0.000416435	TRUE	UP
TC0600000609.mm.2	Snx10	1.465	0.0288707	0.000426317	TRUE	UP
TC0100003167.mm.2	Ptprc	0.8725	0.0288707	0.000427443	TRUE	UP
TC0400003724.mm.2	Cd52	1.5225	0.0288707	0.000427742	TRUE	UP
TC0600000388.mm.2	Tbxas1	1.4425	0.0292331	0.000435746	TRUE	UP
TC1200000203.mm.2	Rrm2	2.4175	0.0292354	0.000437096	TRUE	UP
TC0500003061.mm.2	Mmab	1.03	0.0298288	0.00045448	TRUE	UP
TC0800001396.mm.2	Bco1	1.5875	0.0298672	0.000458392	TRUE	UP
TC1000002886.mm.2	Trhde	2.09	0.0298672	0.000459648	TRUE	UP
TC1600001042.mm.2	Cbr1	2.1275	0.0298672	0.000459992	TRUE	UP
TC1300002691.mm.2	Gzma	1.6425	0.0301478	0.000467029	TRUE	UP
TC0200000013.mm.2	Fam107b	2.16	0.0303851	0.000472073	TRUE	UP
TC0400003792.mm.2	C1qb	2.1025	0.0307517	0.000483308	TRUE	UP
TC0X00001934.mm.2	Cfp	1.6525	0.0309894	0.00048844	TRUE	UP
TC0300001639.mm.2	Fabp4	1.8525	0.0310084	0.000490135	TRUE	UP
TC1600002152.mm.2	Tmprss2	2.425	0.0311459	0.000495114	TRUE	UP
TC1900000709.mm.2	As3mt	1.585	0.0319249	0.000512161	TRUE	UP
TC0700004565.mm.2	Ctsd; Ifitm10	0.92	0.0319249	0.000516127	TRUE	UP
TC0800000659.mm.2	Ddx60	2.0425	0.0320179	0.000520738	TRUE	UP
TC0600002045.mm.2	Akr1b3; Gm6644	1.2275	0.0320179	0.000521953	TRUE	UP
TC0200005123.mm.2	Wfdc16	3.15	0.0321369	0.000525339	TRUE	UP
TC0100001634.mm.2	Pydc3	2.3425	0.0323971	0.00053397	TRUE	UP
TC1100002649.mm.2	Tgtp2	2.8325	0.0326213	0.000540604	TRUE	UP
TC1300000425.mm.2	Ly86	2.0475	0.0331739	0.000554242	TRUE	UP
TC1700000335.mm.2	Abca3	2.605	0.0333394	0.000562864	TRUE	UP
TC0700003845.mm.2	Folr2	2.9	0.0333394	0.000566318	TRUE	UP
TC1000001576.mm.2	BC089597	1.585	0.0335511	0.000574143	TRUE	UP
TC0300003133.mm.2	Ifi44	3.405	0.0338523	0.000582309	TRUE	UP
TC0600002253.mm.2	Cycs	0.7175	0.0338523	0.000582346	TRUE	UP
TC0500003181.mm.2	Oas1a	1.7825	0.0339172	0.000585183	TRUE	UP
TC0800001255.mm.2	Cdh1	1.5275	0.0356831	0.000631517	TRUE	UP
TC0100003591.mm.2	Pydc4	2.2675	0.0357351	0.000637568	TRUE	UP
TC1900001765.mm.2	Vps51; Tm7sf2	1.5125	0.0357351	0.000637753	TRUE	UP
TC0300001641.mm.2	Fabp12	2.32	0.0357351	0.000638874	TRUE	UP
TC0100003505.mm.2	Hsd17b7	2.895	0.0359848	0.000648199	TRUE	UP
TC1300002083.mm.2	Lect2	1.3275	0.0362729	0.000655023	TRUE	UP
TC0200000933.mm.2	Gca	2.4825	0.0363257	0.000659248	TRUE	UP
TC0900000051.mm.2	Mmp27	2.475	0.0364611	0.000663346	TRUE	UP
TC0100002772.mm.2	A730008H23Rik; Hjurp; 6430706D22Rik	2.2875	0.0368808	0.000674687	TRUE	UP
TC0500001464.mm.2	Aacs	2.9225	0.0368808	0.000675966	TRUE	UP
TC1500002075.mm.2	Abcd2	3.315	0.0373305	0.00068925	TRUE	UP
TC0X00001829.mm.2	Cybb	2.025	0.0373857	0.000691954	TRUE	UP
TC0X00000668.mm.2	Nsdhl	2.8875	0.0375665	0.000696992	TRUE	UP
TC1900000020.mm.2	Aldh3b3	1.0925	0.037839	0.000705456	TRUE	UP
TC0400000961.mm.2	Fggy	0.99	0.0389369	0.000732665	TRUE	UP
TC1500000554.mm.2	BC025446	1.26	0.0389369	0.000732938	TRUE	UP
TC1900000090.mm.2	Slc25a45	2.6125	0.0397575	0.000760551	TRUE	UP
TC1400002632.mm.2	Kctd12; Mir5130	0.6575	0.0399343	0.000769053	TRUE	UP
TC0600002578.mm.2	Clec4f	2.5	0.0399343	0.000769075	TRUE	UP
TC0700003946.mm.2	Trim30d	1.2675	0.0399343	0.000769697	TRUE	UP
TC1000001599.mm.2	Cs	1.2425	0.0400175	0.000773102	TRUE	UP
TC1400001930.mm.2	Gch1	1.715	0.0401275	0.000777035	TRUE	UP
TC0600002114.mm.2	Parp12	1.5875	0.0402583	0.000781565	TRUE	UP
TC0300000766.mm.2	Pmvk	2.835	0.0405606	0.000792023	TRUE	UP
TC0400001974.mm.2	Eno1; Eno1b	0.9075	0.0407207	0.000803192	TRUE	UP
TC1100001149.mm.2	Rab34	1.875	0.0413462	0.00081739	TRUE	UP
TC1100003055.mm.2	Cd68	1.8875	0.0413709	0.000819743	TRUE	UP
TC0100003891.mm.2	Ifi203	1.6175	0.0414528	0.000831551	TRUE	UP
TC0500003028.mm.2	Sgsm1	2.215	0.0414528	0.000834431	TRUE	UP
TC0600000841.mm.2	St3gal5	1.8625	0.0415661	0.000840457	TRUE	UP
TC1900001630.mm.2	Sh3pxd2a	1.74	0.0417968	0.000847004	TRUE	UP
TC1600000988.mm.2	Mrap	1.4125	0.0418114	0.000849183	TRUE	UP
TC0600001369.mm.2	Usp18	2.085	0.0418553	0.000853843	TRUE	UP
TC1300002474.mm.2	Hmgcr	3.3275	0.042221	0.000863205	TRUE	UP
TC1200000462.mm.2	Srp54c; Srp54b	1.305	0.0422626	0.000865958	TRUE	UP
TC0X00000122.mm.2	Sytl5	4.015	0.0425169	0.000874151	TRUE	UP
TC0300002343.mm.2	Slc50a1	1.19	0.0425274	0.000879044	TRUE	UP
TC0700003710.mm.2	Tmem135	1.355	0.0429764	0.000892198	TRUE	UP
TC0800003091.mm.2	Sult5a1	3.6125	0.0436344	0.000908576	TRUE	UP
TC0500003026.mm.2	Crybb3	1.235	0.0436344	0.000911218	TRUE	UP
TC0900003275.mm.2	Higd1a	1.4425	0.0436344	0.000912406	TRUE	UP
TC0400000377.mm.2	Dnaic1	3.97	0.0441966	0.000935441	TRUE	UP
TC0200005429.mm.2	Chrna4	5.14	0.0445787	0.000945847	TRUE	UP
TC1500000647.mm.2	Kctd17	1.035	0.0445787	0.000951002	TRUE	UP
TC0200000274.mm.2	Plxdc2	1.205	0.0445787	0.000951234	TRUE	UP
TC1200002272.mm.2	Serpina6	2.7825	0.0445787	0.000952018	TRUE	UP
TC1000000388.mm.2	Scml4	0.7075	0.0445787	0.000953567	TRUE	UP
TC1300000718.mm.2	Ntrk2	2.855	0.0458696	0.00099061	TRUE	UP
TC0700003943.mm.2	Trim30a	2.0125	0.0458696	0.000991507	TRUE	UP
TC1400002002.mm.2	Rnase2a	2.465	0.0460808	0.00100182	TRUE	UP
TC0800002313.mm.2	Msmo1	2.8525	0.047208	0.00104294	TRUE	UP
TC0400000718.mm.2	Orm1	0.96	0.047208	0.00104435	TRUE	UP
TC1500000008.mm.2	Oxct1	0.8425	0.047208	0.00104595	TRUE	UP
TC0700000965.mm.2	Otud7a	0.9875	0.0475631	0.00105596	TRUE	UP
TC0900002115.mm.2	Sc5d	0.9575	0.0476864	0.0010664	TRUE	UP
TC1700000936.mm.2	B430306N03Rik	2.1125	0.0476864	0.00106729	TRUE	UP
TC0900001616.mm.2	Trak1	1.1525	0.047891	0.00107833	TRUE	UP
TC0500002651.mm.2	Igfbp7	1.1325	0.0484064	0.0010931	TRUE	UP
TC1300001353.mm.2	Hmgcs1	2.96	0.0488462	0.00110989	TRUE	UP
TC0100001574.mm.2	Fcgr4	2.235	0.0488462	0.00111084	TRUE	UP
TC1700000470.mm.2	Anks1	2.76	0.048861	0.00111338	TRUE	UP
TC0500001239.mm.2	Oasl2	2.1325	0.0490018	0.00112364	TRUE	UP
TC1200000279.mm.2	Nampt	1.69	0.0490018	0.00112762	TRUE	UP
TC1100004266.mm.2	Irgm2	1.5225	0.0491841	0.00113403	TRUE	UP
TC1100002897.mm.2	Shmt1	1.255	0.0494262	0.00114184	TRUE	UP
TC0400004034.mm.2	Pgd	1.33	0.049544	0.00114902	TRUE	UP
TC0100002576.mm.2	Tns1	1.225	0.0498631	0.00116198	TRUE	UP
TC1200002518.mm.2	Asap2	1.605	0.0500388	0.00117344	TRUE	UP
TC0700001409.mm.2	Ucp2	3.89	0.0502069	0.00118248	TRUE	UP
TC1200001981.mm.2	Rdh11	2.8	0.0503908	0.00119589	TRUE	UP
TC0300000903.mm.2	Ctss	1.7025	0.0507242	0.00120609	TRUE	UP
TC1100003300.mm.2	Tmem97	1.76	0.0509091	0.00121736	TRUE	UP
TC0800001984.mm.2	Nrg1	0.8425	0.0519296	0.00127335	TRUE	UP
TC0200002170.mm.2	Naa20	1.3475	0.0519296	0.0012745	TRUE	UP
TC0100001755.mm.2	Aida	0.79	0.0528147	0.00130344	TRUE	UP
TC0300002847.mm.2	Abcd3	1.0325	0.053141	0.00132026	TRUE	UP
TC1000002814.mm.2	Acss3	2.12	0.0535799	0.00134406	TRUE	UP
TC0400002079.mm.2	Nadk	1.25	0.0535799	0.00134637	TRUE	UP
TC0700004252.mm.2	Gm21957	0.78	0.0545462	0.00137557	TRUE	UP
TC0500000532.mm.2	Pi4k2b	1.8825	0.0546805	0.00138142	TRUE	UP
TC0900001115.mm.2	Rwdd2a	1.4825	0.0548793	0.00139385	TRUE	UP
TC1900000312.mm.2	Prune2	1.15	0.0552354	0.00140592	TRUE	UP
TC0500003615.mm.2	Usp12	0.9925	0.0552354	0.00141347	TRUE	UP
TC1700002819.mm.2	H2-T23	1.06	0.0552354	0.00141499	TRUE	UP
TC1000002420.mm.2	Adarb1	0.845	0.0552354	0.00141534	TRUE	UP
TC1900001425.mm.2	Slc16a12	1.5075	0.0558163	0.00144279	TRUE	UP
TC0300000925.mm.2	Mtmr11	1.5775	0.0566832	0.00147651	TRUE	UP
TC1100004291.mm.2	Psme2b	1.2925	0.0566832	0.00147796	TRUE	UP
TC1900000441.mm.2	Cd274	0.9725	0.056898	0.00148836	TRUE	UP
TC0700003829.mm.2	P2ry6	0.9225	0.056898	0.00148869	TRUE	UP
TC0400004032.mm.2	Apitd1	0.75	0.0582205	0.00153115	TRUE	UP
TC0600003135.mm.2	Gapdh	0.7125	0.0585028	0.00154121	TRUE	UP
TC0400002290.mm.2	Tstd3	0.84	0.0589109	0.00156537	TRUE	UP
TC0800002665.mm.2	Sall1	2.3125	0.0593328	0.00158178	TRUE	UP
TC1100001236.mm.2	Slfn5	1.1125	0.0593955	0.00158613	TRUE	UP
TC1700000990.mm.2	Adgre4	1.0475	0.0602198	0.00161627	TRUE	UP
TC0700001258.mm.2	Ctsc	1.96	0.0602744	0.00162487	TRUE	UP
TC1500001809.mm.2	Apol9a	1.305	0.0618952	0.00168741	TRUE	UP
TC1100004265.mm.2	Igtp	2.0375	0.0621249	0.00170378	TRUE	UP
TC1500002012.mm.2	Cerk	1.305	0.0622391	0.00171026	TRUE	UP
TC1600002148.mm.2	Mx1	1.49	0.0622391	0.00171532	TRUE	UP
TC0700004515.mm.2	Ifitm3	1.1175	0.0624984	0.00172809	TRUE	UP
TC0700004530.mm.2	Irf7	3.3125	0.0625414	0.0017321	TRUE	UP
TC1600002177.mm.2	Dexi	0.7475	0.0632829	0.00176277	TRUE	UP
TC1700001892.mm.2	H2-K1	0.6025	0.065343	0.00185174	TRUE	UP
TC1700002778.mm.2	Tapbp	1.05	0.0654505	0.00186648	TRUE	UP
TC0700002655.mm.2	Cyp2a22	4.955	0.0654505	0.00186867	TRUE	UP
TC0400001514.mm.2	Fndc5	1.9675	0.0657321	0.00189087	TRUE	UP
TC0300000137.mm.2	Cp	0.805	0.0661705	0.00191008	TRUE	UP
TC1900001066.mm.2	Slc3a2	0.9925	0.0662127	0.0019144	TRUE	UP
TC0900002106.mm.2	Ubash3b	1.495	0.06821	0.00200274	TRUE	UP
TC0700001841.mm.2	Itgal	1.1125	0.0687578	0.00202192	TRUE	UP
TC1500001982.mm.2	Sult4a1	1.8225	0.069145	0.00203826	TRUE	UP
TC0600000553.mm.2	Sspo	1.3575	0.069145	0.00203954	TRUE	UP
TC1500001450.mm.2	Angpt1	2.9525	0.0692863	0.00204683	TRUE	UP
TC0500002699.mm.2	Sult1d1	2.65	0.0693052	0.00205056	TRUE	UP
TC1600001966.mm.2	App	1.1575	0.0693052	0.00205781	TRUE	UP
TC1200001552.mm.2	Rsad2	1.785	0.0693052	0.00205987	TRUE	UP
TC0200005030.mm.2	Tgm2	1.12	0.069377	0.00206691	TRUE	UP
TC0900000046.mm.2	Mmp12	1.5775	0.069377	0.00207372	TRUE	UP
TC0500003465.mm.2	Pilrb2	1.32	0.069377	0.0020812	TRUE	UP
TC0600003539.mm.2	D630045J12Rik	1.0775	0.069377	0.0020866	TRUE	UP
TC1000001024.mm.2	Rfx4	2.085	0.069377	0.00208776	TRUE	UP
TC0100001522.mm.2	Adcy10	3.4325	0.069377	0.00209435	TRUE	UP
TC0100003240.mm.2	Prg4	2.1625	0.069377	0.00210943	TRUE	UP
TC0500003464.mm.2	Pilrb1	1.495	0.069377	0.00211629	TRUE	UP
TC0200000561.mm.2	Aif1l	0.8125	0.069377	0.00212136	TRUE	UP
TC1700001034.mm.2	Adgre1	1.145	0.069596	0.00213119	TRUE	UP
TC0400004221.mm.2	AU022252	0.66	0.0705052	0.00217132	TRUE	UP
TC0X00002676.mm.2	Vsig4	1.605	0.0706186	0.00217841	TRUE	UP
TC1700000474.mm.2	Ppard; 1810013A23Rik	1.5975	0.070698	0.00218404	TRUE	UP
TC1100000302.mm.2	Rtn4	1.3875	0.0709144	0.00220031	TRUE	UP
TC0200005150.mm.2	Slc13a3	0.935	0.0709144	0.002204	TRUE	UP
TC0400002580.mm.2	Shb	0.985	0.0709144	0.00220857	TRUE	UP
TC1500001002.mm.2	Tuba1c	0.995	0.0712469	0.00223549	TRUE	UP
TC0400004227.mm.2	Ctrc	0.5875	0.0714722	0.00224658	TRUE	UP
TC1500001152.mm.2	Card6	0.86	0.0714732	0.00224983	TRUE	UP
TC0300002500.mm.2	Hist2h3c2	1.11	0.0715368	0.0022615	TRUE	UP
TC0300003216.mm.2	Hist2h3c1	1.11	0.0715368	0.0022615	TRUE	UP
TC1300001169.mm.2	Sgtb	1.245	0.0725659	0.0023136	TRUE	UP
TC0100003889.mm.2	Mnda	1.77	0.0725659	0.00231364	TRUE	UP
TC1700002789.mm.2	H2-Q7; H2-Q9	1.0975	0.0725719	0.0023171	TRUE	UP
TC1200002251.mm.2	Lgmn	1.07	0.0732005	0.00234376	TRUE	UP
TC0900002113.mm.2	Sorl1	0.5825	0.0733642	0.00236103	TRUE	UP
TC0700003620.mm.2	Gm10160	0.9725	0.0733642	0.00236403	TRUE	UP
TC0600001203.mm.2	Bhlhe40	2.415	0.0733642	0.00238235	TRUE	UP
TC1900001203.mm.2	Psat1	2.195	0.0733642	0.00238554	TRUE	UP
TC0X00001564.mm.2	2210013O21Rik	1.0425	0.0733642	0.00241347	TRUE	UP
TC0900001200.mm.2	Pcolce2	1.9425	0.0733642	0.00241623	TRUE	UP
TC1100002829.mm.2	2210407C18Rik	2.74	0.0733831	0.00243163	TRUE	UP
TC0X00001071.mm.2	Pgk1	0.69	0.0733831	0.00244347	TRUE	UP
TC0600002324.mm.2	Ggct	1.74	0.0733831	0.00244503	TRUE	UP
TC0100003888.mm.2	Ifi204	1.6425	0.0733831	0.00244544	TRUE	UP
TC0500002320.mm.2	Prom1	4.32	0.073927	0.00247218	TRUE	UP
TC0300000948.mm.2	Hfe2	0.92	0.0739654	0.00247817	TRUE	UP
TC0700000583.mm.2	Fam187b	0.98	0.0745223	0.00251025	TRUE	UP
TC0400000416.mm.2	Gm21955	1.035	0.0751817	0.00253923	TRUE	UP
TC1400000350.mm.2	1810011H11Rik	0.925	0.0751943	0.00254813	TRUE	UP
TC0100001632.mm.2	Pyhin1	1.7425	0.0751943	0.00255123	TRUE	UP
TC0700000444.mm.2	Cyp2g1	1.6825	0.0761127	0.00259125	TRUE	UP
TC0200003298.mm.2	Uck1	2.2025	0.0761272	0.00260586	TRUE	UP
TC1100001209.mm.2	Tmem98	1.215	0.0761272	0.0026113	TRUE	UP
TC0800001696.mm.2	Col4a1	0.7675	0.0761272	0.00261231	TRUE	UP
TC0800000734.mm.2	Tm6sf2	1.6325	0.0762038	0.0026321	TRUE	UP
TC0700002644.mm.2	Axl	2.0125	0.0764702	0.00264847	TRUE	UP
TC0400000726.mm.2	6330416G13Rik	0.7825	0.0764702	0.00265163	TRUE	UP
TC1600001383.mm.2	Gm9525	1.295	0.0768406	0.00268021	TRUE	UP
TC0400002633.mm.2	Acnat2	2.4175	0.076956	0.00269389	TRUE	UP
TC0800001033.mm.2	Nkd1	1.165	0.0781088	0.00275769	TRUE	UP
TC1600001580.mm.2	Cd86	0.97	0.078229	0.0027725	TRUE	UP
TC0900002676.mm.2	Mapk6	2.255	0.0783141	0.00278148	TRUE	UP
TC1600000656.mm.2	Cfap44	1.1725	0.0783141	0.00278361	TRUE	UP
TC1600000346.mm.2	Rtp4	2.1875	0.0784716	0.00279947	TRUE	UP
TC0700000261.mm.2	Ceacam11	0.6675	0.0785725	0.00282327	TRUE	UP
TC1100003382.mm.2	Slfn8	1.475	0.0786054	0.00283466	TRUE	UP
TC1500002313.mm.2	Nfe2	1.8675	0.0786054	0.00283815	TRUE	UP
TC1100002003.mm.2	Rnf213	1.7875	0.0786054	0.00283894	TRUE	UP
TC0900001900.mm.2	Acp5	1.3625	0.0788817	0.00286714	TRUE	UP
TC0800003059.mm.2	Slc7a5	1.5225	0.0788817	0.0028785	TRUE	UP
TC0500003417.mm.2	Sh2b2	1	0.0788817	0.00288329	TRUE	UP
TC0600002221.mm.2	Zfp467	1.065	0.0788817	0.00288632	TRUE	UP
TC1200002101.mm.2	0610007P14Rik	1.3925	0.0788817	0.00289147	TRUE	UP
TC1100000638.mm.2	Gpx3	1.7725	0.0788817	0.00289389	TRUE	UP
TC0500000997.mm.2	Arhgap24	1.25	0.0790354	0.00291486	TRUE	UP
TC0500003175.mm.2	Oas2	1.215	0.0790354	0.0029243	TRUE	UP
TC1400002054.mm.2	Slc7a7	1.345	0.0790354	0.00293202	TRUE	UP
TC1500000037.mm.2	Fyb	1.0875	0.0792927	0.00295773	TRUE	UP
TC1500001727.mm.2	Ly6i	0.9425	0.079542	0.00297307	TRUE	UP
TC1200000458.mm.2	Srp54a	0.9275	0.0799066	0.00299475	TRUE	UP
TC1300002468.mm.2	Sv2c	0.7225	0.0801063	0.00300858	TRUE	UP
TC0100003797.mm.2	Mfsd7b	0.78	0.0806726	0.00304075	TRUE	UP
TC1200002434.mm.2	Akt1	1.995	0.081138	0.00306926	TRUE	UP
TC0100003443.mm.2	Dcaf6	1.015	0.0811674	0.00308223	TRUE	UP
TC1700001827.mm.2	Sik1	2.355	0.0813779	0.00309666	TRUE	UP
TC1900000501.mm.2	Ifit3	2.3175	0.0815496	0.0031393	TRUE	UP
TC1300000301.mm.2	Prl6a1	0.71	0.0815496	0.00314347	TRUE	UP
TC0400001107.mm.2	Dhcr24	1.6425	0.0815496	0.0031445	TRUE	UP
TC1300000763.mm.2	Mir23b; Mir27b; Mir24-1; 2010111I01Rik	1.46	0.0815496	0.00315268	TRUE	UP
TC0700003028.mm.2	Emp3	1.085	0.0815496	0.0031572	TRUE	UP
TC0900001459.mm.2	Scap	0.84	0.0815496	0.00316342	TRUE	UP
TC1300000281.mm.2	D130043K22Rik	1.3075	0.0815496	0.00316746	TRUE	UP
TC0100002993.mm.2	Actr3	0.78	0.0815496	0.00317656	TRUE	UP
TC0400000889.mm.2	Gm13271	0.83	0.0815994	0.00318225	TRUE	UP
TC0800001594.mm.2	Nrp1; Mir1903	1.1875	0.081971	0.00320247	TRUE	UP
TC0400002634.mm.2	Acnat1	1.64	0.081971	0.00320413	TRUE	UP
TC0700003996.mm.2	Gm4070; Gvin1; Gm17757; Gm18853	0.9925	0.0819802	0.00321521	TRUE	UP
TC0200005290.mm.2	Zbp1	1.685	0.0831087	0.00328602	TRUE	UP
TC1900000118.mm.2	Rasgrp2	1.1175	0.0831967	0.00330074	TRUE	UP
TC0200005181.mm.2	Znfx1	2.0275	0.0836744	0.00332346	TRUE	UP
TC1900001428.mm.2	Pank1	1.015	0.0842163	0.00336587	TRUE	UP
TC1100000109.mm.2	Adcy1	0.735	0.0842163	0.00337371	TRUE	UP
TC0100000237.mm.2	Hs6st1	1.57	0.0842163	0.00337761	TRUE	UP
TC0300001447.mm.2	Gbp2	1.4625	0.0850244	0.00342659	TRUE	UP
TC0X00003324.mm.2	Rnf138rt1	0.6575	0.0850244	0.00342998	TRUE	UP
TC1200001908.mm.2	Dhrs7	1.345	0.0850244	0.00343452	TRUE	UP
TC1100001451.mm.2	Ppp1r9b	1.36	0.0851984	0.00344973	TRUE	UP
TC0900002778.mm.2	Gm17530	4.0075	0.0851984	0.00345259	TRUE	UP
TC1700000715.mm.2	Gnl1	0.7325	0.0855542	0.00347133	TRUE	UP
TC1600000454.mm.2	Lrch3	0.7475	0.0858225	0.00348866	TRUE	UP
TC0600003536.mm.2	Clec1b	1.2175	0.0858621	0.00350013	TRUE	UP
TC0100002967.mm.2	Marco	1.7475	0.0858621	0.00350316	TRUE	UP
TC0200002709.mm.2	Zfp831	0.63	0.0859342	0.00351296	TRUE	UP
TC0300000769.mm.2	Adar	0.9825	0.0860748	0.00353121	TRUE	UP
TC1600001824.mm.2	Nsun3	0.85	0.0864041	0.0035525	TRUE	UP
TC0100002392.mm.2	Trak2	1.4775	0.0865205	0.00356144	TRUE	UP
TC1500000549.mm.2	Ly6e	1.455	0.0865205	0.00356508	TRUE	UP
TC0900002071.mm.2	Olfr938	0.7875	0.0867029	0.00358431	TRUE	UP
TC1900000646.mm.2	Scd2; Mir5114	1.59	0.0869958	0.00361178	TRUE	UP
TC1900000246.mm.2	Mpeg1	1.6025	0.0869958	0.00361209	TRUE	UP
TC0100001387.mm.2	Glul; Mir8114	1.055	0.0873699	0.00363943	TRUE	UP
TC0600003264.mm.2	Klra2	1.0075	0.0878144	0.00366905	TRUE	UP
TC0300002695.mm.2	Cd53	1.7575	0.088247	0.00369186	TRUE	UP
TC1400001487.mm.2	Rarb	2.04	0.0884914	0.00371062	TRUE	UP
TC1300000045.mm.2	Idi1	3.91	0.0884914	0.00371829	TRUE	UP
TC0100003533.mm.2	Fcer1g	2.3	0.0894425	0.0037741	TRUE	UP
TC0100003401.mm.2	Fmo1	0.87	0.0902066	0.00381853	TRUE	UP
TC0100000706.mm.2	Col4a3	4.345	0.0911037	0.00386471	TRUE	UP
TC1000002930.mm.2	Lyz1	1.625	0.0911626	0.00387542	TRUE	UP
TC1500002182.mm.2	Ddx23	0.73	0.0911821	0.00388035	TRUE	UP
TC1800000965.mm.2	Gm17430	1.9075	0.0917445	0.0039274	TRUE	UP
TC0400004216.mm.2	Podn	1.4875	0.0917445	0.00393551	TRUE	UP
TC1100000383.mm.2	Pank3	1.0075	0.0917445	0.00393563	TRUE	UP
TC0100003593.mm.2	AI607873	1.7775	0.0917445	0.00394043	TRUE	UP
TC0200000245.mm.2	Mrc1	0.8825	0.0917445	0.00394147	TRUE	UP
TC1200000459.mm.2	1700047I17Rik2; Fam177a	1.05	0.0918237	0.0039537	TRUE	UP
TC1200000461.mm.2	1700047I17Rik2; Fam177a	1.05	0.0918237	0.0039537	TRUE	UP
TC1100000989.mm.2	Xaf1	1.975	0.0918237	0.00396778	TRUE	UP
TC0400001229.mm.2	Cyp4a31	3.52	0.0918237	0.00396947	TRUE	UP
TC0100003887.mm.2	Nos1ap	1.6575	0.0918237	0.00397704	TRUE	UP
TC1200002532.mm.2	Serpina1d	0.7625	0.0918356	0.00399501	TRUE	UP
TC0600002811.mm.2	Gm765	1.255	0.0924176	0.00402865	TRUE	UP
TC1000000208.mm.2	Stx7	0.7375	0.0925671	0.00403934	TRUE	UP
TC1600001387.mm.2	Kng2	0.6475	0.0931604	0.00407268	TRUE	UP
TC1700001949.mm.2	Apom	1.1575	0.0931604	0.00407362	TRUE	UP
TC1100002045.mm.2	Rac3	0.94	0.094268	0.00414327	TRUE	UP
TC0200003165.mm.2	Fcna	1.4775	0.0944157	0.00415637	TRUE	UP
TC1000000170.mm.2	Gm5420	0.88	0.0945107	0.00417474	TRUE	UP
TC0X00001286.mm.2	Armcx1	0.655	0.0945107	0.00417948	TRUE	UP
TC0700003614.mm.2	Homer2	0.825	0.0945352	0.00418747	TRUE	UP
TC0800002403.mm.2	Ifi30	1.5375	0.0945352	0.00418908	TRUE	UP
TC0X00003437.mm.2	Il2rg	1.8575	0.0948624	0.00421701	TRUE	UP
TC0700001710.mm.2	Acsm2	2.1825	0.0948624	0.00422066	TRUE	UP
TC0900002321.mm.2	Cib2	1.6675	0.0948681	0.00422638	TRUE	UP
TC0200004406.mm.2	Fsip1	0.9475	0.0948681	0.00423007	TRUE	UP
TC1100004126.mm.2	Mxra7	0.7275	0.0949597	0.00424887	TRUE	UP
TC1400000784.mm.2	Psme1	0.9425	0.0951771	0.00427753	TRUE	UP
TC0700000285.mm.2	Dmpk	1.2175	0.0956307	0.00431514	TRUE	UP
TC1200000145.mm.2	Hpcal1	0.925	0.0961032	0.00435679	TRUE	UP
TC1900000221.mm.2	Ms4a6c	1.5775	0.0962835	0.00437494	TRUE	UP
TC0X00001201.mm.2	Cldn34c1	1.2225	0.0966484	0.00440023	TRUE	UP
TC0100003204.mm.2	Rgs2	1.6375	0.0974173	0.00447911	TRUE	UP
TC0300000844.mm.2	Flg	0.6675	0.0975259	0.00448849	TRUE	UP
TC0500003632.mm.2	Slc46a3	1.2525	0.0982027	0.00452849	TRUE	UP
TC0500002919.mm.2	Tgfbr3	1.17	0.0990916	0.00457646	TRUE	UP
TC1000000759.mm.2	Itgb2	1.515	0.099813	0.00464745	TRUE	UP
TC0500000260.mm.2	Insig1	1.165	0.099813	0.00464769	TRUE	UP
TC0400001221.mm.2	Cyp4a12a	-12.905	0.000177844	2.40265e-08	TRUE	DOWN
TC0300001322.mm.2	Etnppl	-6.805	0.000434174	1.57739e-07	TRUE	DOWN
TC0400001223.mm.2	Cyp4a12b	-10.915	0.000434174	1.77586e-07	TRUE	DOWN
TC1900001550.mm.2	Cyp2c44	-6.64	0.000434174	2.05283e-07	TRUE	DOWN
TC0400003101.mm.2	Cyp2j5	-3.22	0.000493287	3.55426e-07	TRUE	DOWN
TC1500001945.mm.2	Cyp2d11; Mir7684	-3.25	0.000808632	7.52826e-07	TRUE	DOWN
TC1400000301.mm.2	Chdh	-3.24	0.000808632	7.64716e-07	TRUE	DOWN
TC1900000040.mm.2	Pcx	-1.29	0.000900221	8.9187e-07	TRUE	DOWN
TC0200002869.mm.2	Mcm10	-4.7625	0.00117515	1.41693e-06	TRUE	DOWN
TC0600001422.mm.2	C1ra	-1.3475	0.00117515	1.42885e-06	TRUE	DOWN
TC1000000713.mm.2	Upb1	-2.4875	0.00152011	2.05365e-06	TRUE	DOWN
TC1500000072.mm.2	Ugt3a1	-5.455	0.0016655	2.40007e-06	TRUE	DOWN
TC1000001895.mm.2	Enpp3	-3.6175	0.00173239	2.57447e-06	TRUE	DOWN
TC1000002645.mm.2	Chpt1	-2.8	0.00174642	2.67398e-06	TRUE	DOWN
TC1800000105.mm.2	Ttc39c	-2.3225	0.00180607	3.16095e-06	TRUE	DOWN
TC1500000014.mm.2	C6	-6.2825	0.00185217	3.41975e-06	TRUE	DOWN
TC1700000832.mm.2	Adgrf1	-5.55	0.0018972	3.71102e-06	TRUE	DOWN
TC0X00003057.mm.2	Serpina7	-5.9625	0.0019312	3.92624e-06	TRUE	DOWN
TC1700000563.mm.2	Cyp4f17	-1.3925	0.00193195	4.16368e-06	TRUE	DOWN
TC1900000249.mm.2	Gm4952	-3.81	0.0027766	6.86828e-06	TRUE	DOWN
TC1100000955.mm.2	Psmb6	-0.605	0.00286769	7.36099e-06	TRUE	DOWN
TC0300002218.mm.2	Tdo2	-2.8575	0.00298159	7.78765e-06	TRUE	DOWN
TC1000002305.mm.2	Reep3	-0.9425	0.0036367	9.99003e-06	TRUE	DOWN
TC0X00001501.mm.2	Alas2	-4.0125	0.00369806	1.06582e-05	TRUE	DOWN
TC1500001531.mm.2	Enpp2	-3	0.00377783	1.13111e-05	TRUE	DOWN
TC1100003561.mm.2	Abcc3	-5.355	0.00379572	1.16259e-05	TRUE	DOWN
TC1900000254.mm.2	Keg1	-6.085	0.00445735	1.44524e-05	TRUE	DOWN
TC1500001657.mm.2	Ndrg1	-3.45	0.00449907	1.49928e-05	TRUE	DOWN
TC1400000833.mm.2	Rcbtb1	-1.23	0.00462853	1.64226e-05	TRUE	DOWN
TC0300002559.mm.2	Hsd3b3	-3.985	0.00466352	1.7221e-05	TRUE	DOWN
TC0600001458.mm.2	Scnn1a	-2.0925	0.00469085	1.75331e-05	TRUE	DOWN
TC0700001252.mm.2	Nox4	-6.3575	0.00514367	2.0173e-05	TRUE	DOWN
TC0100000427.mm.2	Aox1	-3.7875	0.00514367	2.03838e-05	TRUE	DOWN
TC1900001516.mm.2	Mms19	-0.885	0.00556376	2.22991e-05	TRUE	DOWN
TC0300003245.mm.2	Gstm6	-1.7725	0.0062306	2.62817e-05	TRUE	DOWN
TC0800000796.mm.2	Slc27a1	-1.125	0.0062306	2.63747e-05	TRUE	DOWN
TC0500002881.mm.2	Hsd17b13	-1.4325	0.00644249	2.82982e-05	TRUE	DOWN
TC0100000428.mm.2	Aox3	-1.8275	0.00644249	2.83258e-05	TRUE	DOWN
TC1600000376.mm.2	Il1rap	-3.6775	0.00644249	2.84322e-05	TRUE	DOWN
TC1700001805.mm.2	Glo1	-2.7475	0.00649765	2.89682e-05	TRUE	DOWN
TC0200004634.mm.2	Ddrgk1	-0.885	0.00696488	3.1555e-05	TRUE	DOWN
TC0500002882.mm.2	Hsd17b11	-2.455	0.00715753	3.28771e-05	TRUE	DOWN
TC0300002957.mm.2	Cyp2u1	-5.675	0.00724993	3.3628e-05	TRUE	DOWN
TC0700003823.mm.2	Plekhb1	-3.0275	0.00732532	3.48928e-05	TRUE	DOWN
TC1100003997.mm.2	Abca8b	-2.27	0.00732532	3.62356e-05	TRUE	DOWN
TC0100002645.mm.2	Serpine2	-1.455	0.00732532	3.78631e-05	TRUE	DOWN
TC1000002572.mm.2	Nfyb	-1.38	0.00732532	3.78652e-05	TRUE	DOWN
TSUnmapped00000008.mm.2	44256	-1.3175	0.00757056	3.95472e-05	TRUE	DOWN
TC1500002053.mm.2	Odf3b	-2.7325	0.00785238	4.16871e-05	TRUE	DOWN
TC1300001378.mm.2	Akr1c12	-1.8275	0.00792189	4.28094e-05	TRUE	DOWN
TC1300000019.mm.2	Akr1c13	-1.72	0.00819588	4.49422e-05	TRUE	DOWN
TC1200000765.mm.2	Pcnx	-0.6625	0.00919121	5.42218e-05	TRUE	DOWN
TC1300000016.mm.2	Akr1c14	-1.5725	0.00932219	5.58341e-05	TRUE	DOWN
TC1500001136.mm.2	Ghr	-1.055	0.00958776	5.83205e-05	TRUE	DOWN
TC1300001494.mm.2	Sugct	-1.99	0.00958776	5.872e-05	TRUE	DOWN
TC0600000902.mm.2	Eva1a	-1.9475	0.00995777	6.33835e-05	TRUE	DOWN
TC0400001970.mm.2	Slc2a5	-2.335	0.0104127	6.7442e-05	TRUE	DOWN
TC0600000711.mm.2	Abcg2	-3.3125	0.0105802	6.90859e-05	TRUE	DOWN
TC0300000484.mm.2	Sucnr1	-4.49	0.0106072	7.03799e-05	TRUE	DOWN
TC1600000335.mm.2	St6gal1	-2.705	0.0106072	7.06638e-05	TRUE	DOWN
TC0700004509.mm.2	Sirt3	-1.8775	0.0106072	7.06955e-05	TRUE	DOWN
TC1900001445.mm.2	Ppp1r3c	-7.86	0.0106458	7.14321e-05	TRUE	DOWN
TC0900001921.mm.2	Dpy19l1	-1.86	0.0107044	7.23076e-05	TRUE	DOWN
TC0600000854.mm.2	Retsat	-2.705	0.010747	7.34524e-05	TRUE	DOWN
TC0300001494.mm.2	Uox	-2.9975	0.010747	7.35632e-05	TRUE	DOWN
TC0500002592.mm.2	Ociad2	-3.0475	0.0108004	7.53879e-05	TRUE	DOWN
TC1000002943.mm.2	Slc35e3	-1.4475	0.0110827	7.78572e-05	TRUE	DOWN
TC0700002383.mm.2	Sult2a8	-0.98	0.0113338	8.06468e-05	TRUE	DOWN
TC0600002326.mm.2	Inmt	-4.095	0.0113338	8.11524e-05	TRUE	DOWN
TC1500001946.mm.2	Cyp2d10	-1.3425	0.0114376	8.24105e-05	TRUE	DOWN
TC1200000287.mm.2	Atxn7l1	-2.885	0.0115242	8.35538e-05	TRUE	DOWN
TC0400001141.mm.2	Echdc2	-2.005	0.0115297	8.41133e-05	TRUE	DOWN
TC0500002695.mm.2	Ugt2a3	-1.04	0.0116656	8.56297e-05	TRUE	DOWN
TC1100003276.mm.2	Pipox	-1.3125	0.0120666	8.91163e-05	TRUE	DOWN
TC0700001715.mm.2	Acsm3	-1.41	0.0120952	8.98723e-05	TRUE	DOWN
TC1200002078.mm.2	Aldh6a1	-0.9025	0.0125481	9.43675e-05	TRUE	DOWN
TC0800000645.mm.2	Aadat	-1.2975	0.0129489	9.79649e-05	TRUE	DOWN
TC1500000757.mm.2	Cyp2d9	-6.6425	0.013184	0.000100931	TRUE	DOWN
TC1900000684.mm.2	Elovl3	-4.7825	0.0132018	0.000101955	TRUE	DOWN
TC1000001284.mm.2	Csrp2	-1.3	0.0132018	0.00010404	TRUE	DOWN
TC0900003293.mm.2	Zfp445	-1.435	0.0135561	0.000107443	TRUE	DOWN
TC0600001374.mm.2	Mug2	-2.7475	0.0136619	0.000109255	TRUE	DOWN
TC1000000175.mm.2	H60b; Raet1a; Raet1b; Raet1c; Raet1d; Raet1e	-2.0475	0.0136619	0.000109512	TRUE	DOWN
TC1500001944.mm.2	Cyp2d22	-2.6875	0.0137195	0.000110592	TRUE	DOWN
TC0500001560.mm.2	Rfc2	-1.635	0.013869	0.000113273	TRUE	DOWN
TC0900002604.mm.2	Aqp9	-1.4	0.013869	0.00011367	TRUE	DOWN
TC1900001477.mm.2	Cyp2c67	-3.6975	0.0139223	0.00011505	TRUE	DOWN
TC0900000664.mm.2	Ireb2	-1.53	0.0143489	0.000121188	TRUE	DOWN
TC1200001262.mm.2	Adssl1	-1.9375	0.0151746	0.000129154	TRUE	DOWN
TC1300000020.mm.2	Akr1c19	-2.4925	0.0152252	0.000130271	TRUE	DOWN
TC0100003104.mm.2	Adora1	-3.7075	0.0156686	0.000135476	TRUE	DOWN
TC0500000176.mm.2	Pmpcb	-0.8775	0.0161744	0.000142763	TRUE	DOWN
TC0700000458.mm.2	Blvrb	-2.5075	0.0162979	0.000145164	TRUE	DOWN
TC1400002266.mm.2	Ephx2	-2.21	0.0170934	0.000154655	TRUE	DOWN
TC0500003600.mm.2	Cyp3a11	-1.6275	0.0170983	0.000155537	TRUE	DOWN
TC0900001048.mm.2	Gsta4	-1.8175	0.0171881	0.000157128	TRUE	DOWN
TC1800001461.mm.2	Fech	-1.2775	0.0173274	0.000159181	TRUE	DOWN
TC0300003173.mm.2	Acadm	-2.1	0.0180282	0.000172337	TRUE	DOWN
TC1700000354.mm.2	Hagh	-1.07	0.018419	0.000179689	TRUE	DOWN
TC1000002195.mm.2	Serinc1	-1.025	0.018419	0.000180823	TRUE	DOWN
TC0700003581.mm.2	Idh2	-1.51	0.0186393	0.000186343	TRUE	DOWN
TC0300001667.mm.2	Car1	-4.5175	0.0186558	0.000188602	TRUE	DOWN
TC0600001375.mm.2	Gm10319	-1.62	0.0190964	0.000201232	TRUE	DOWN
TC0900000927.mm.2	Myo1e	-1.195	0.019188	0.000203925	TRUE	DOWN
TC1700000337.mm.2	Eci1	-1.3775	0.0192032	0.000205881	TRUE	DOWN
TC0100003738.mm.2	44256	-1.0175	0.0192032	0.000212178	TRUE	DOWN
TC0900000573.mm.2	Cadm1	-1.255	0.0192032	0.000212281	TRUE	DOWN
TC1500002328.mm.2	Agxt2	-2.7675	0.0192032	0.000212412	TRUE	DOWN
TC1700002187.mm.2	Gnmt	-1.1975	0.0192032	0.000215202	TRUE	DOWN
TC0300000967.mm.2	Fmo5	-2.055	0.0192032	0.000216251	TRUE	DOWN
TC1300002176.mm.2	Fbp1	-1.285	0.0192032	0.000216966	TRUE	DOWN
TC0900002719.mm.2	Gsta2	-4.7925	0.0193055	0.000219084	TRUE	DOWN
TC0X00000323.mm.2	Pgrmc1	-0.81	0.0200316	0.000228438	TRUE	DOWN
TC1500002056.mm.2	Arsa	-2.8025	0.0200316	0.000229129	TRUE	DOWN
TC0700001816.mm.2	Ypel3	-1.68	0.0201161	0.000231001	TRUE	DOWN
TC0700000917.mm.2	Gas2	-2.975	0.0208005	0.000243452	TRUE	DOWN
TC1700001209.mm.2	Galm	-1.45	0.0208005	0.00024623	TRUE	DOWN
TC0500000167.mm.2	Tmem60	-0.745	0.0208005	0.000246353	TRUE	DOWN
TC0900002379.mm.2	Cyp1a2	-1.515	0.0210677	0.000252365	TRUE	DOWN
TC0300002277.mm.2	Cd1d1	-1.6225	0.0221518	0.00026887	TRUE	DOWN
TC1100000753.mm.2	Gid4	-1.235	0.022643	0.000276333	TRUE	DOWN
TC0700000514.mm.2	Ech1	-1.715	0.0233739	0.000286783	TRUE	DOWN
TC0X00002433.mm.2	Bcap31	-0.6975	0.0233853	0.000288552	TRUE	DOWN
TC1100000940.mm.2	Asgr2	-2.0775	0.0234444	0.000292448	TRUE	DOWN
TC0400002606.mm.2	Gabbr2	-3.19	0.0236944	0.000296633	TRUE	DOWN
TC0X00000064.mm.2	Wdr45	-1.77	0.0238209	0.00029929	TRUE	DOWN
TC1200000798.mm.2	Acot1	-3.4675	0.0239253	0.000302757	TRUE	DOWN
TC0500000488.mm.2	Lap3	-2.0425	0.0239543	0.000305281	TRUE	DOWN
TC0100002601.mm.2	Abcb6	-1.8225	0.0240478	0.000308127	TRUE	DOWN
TC0500002693.mm.2	Ugt2b5	-1.9725	0.0240478	0.000309993	TRUE	DOWN
TC0500003576.mm.2	Baiap2l1	-2.21	0.0240478	0.000311314	TRUE	DOWN
TC1600001124.mm.2	Adcy9	-1.82	0.0240478	0.000311887	TRUE	DOWN
TC1000002900.mm.2	Tmem19	-1.485	0.0243352	0.000318709	TRUE	DOWN
TC0200004550.mm.2	Ciao1	-0.9225	0.0245536	0.000326187	TRUE	DOWN
TC1400001047.mm.2	Esd	-1.0175	0.0250053	0.000335566	TRUE	DOWN
TC0100002488.mm.2	Kansl1l	-1.735	0.0254206	0.000343049	TRUE	DOWN
TC1800001366.mm.2	Aldh7a1	-1.145	0.0259759	0.00035327	TRUE	DOWN
TC0600000849.mm.2	Tmem150a	-1.3425	0.0261839	0.000357278	TRUE	DOWN
TC1100001484.mm.2	Ttll6	-0.78	0.0272484	0.000379434	TRUE	DOWN
TC0400004194.mm.2	Ubr4	-0.65	0.0272484	0.000379793	TRUE	DOWN
TC0200001524.mm.2	Slc1a2	-1.74	0.0272484	0.000380403	TRUE	DOWN
TC1400001438.mm.2	Acox2	-1.77	0.0272484	0.00038162	TRUE	DOWN
TC0600003345.mm.2	Slc15a5	-3.3625	0.0273591	0.000385005	TRUE	DOWN
TC1800001463.mm.2	Atp8b1	-1.0925	0.0275456	0.000391934	TRUE	DOWN
TC0500001210.mm.2	Iscu	-1.1725	0.0275456	0.000391984	TRUE	DOWN
TC1000002374.mm.2	Gucd1	-1.77	0.0280772	0.000402545	TRUE	DOWN
TC0200003362.mm.2	Stom	-1.59	0.0280772	0.000403343	TRUE	DOWN
TC1700002768.mm.2	9030025P20Rik	-0.6275	0.0281799	0.000406087	TRUE	DOWN
TC0700001939.mm.2	Lhpp	-2.2525	0.0282818	0.000408829	TRUE	DOWN
TC1500001953.mm.2	Cyp2d13	-2.84	0.0284964	0.000413214	TRUE	DOWN
TC0900000835.mm.2	Clpx	-1.465	0.0285125	0.000414733	TRUE	DOWN
TC0300002725.mm.2	Gstm1	-0.9275	0.0288707	0.00042487	TRUE	DOWN
TC1000003112.mm.2	Mars	-1.185	0.0288707	0.000427528	TRUE	DOWN
TC0100002349.mm.2	Pgap1	-1.4675	0.0289573	0.00043033	TRUE	DOWN
TC0600001421.mm.2	C1rl	-1.0525	0.0293435	0.000442099	TRUE	DOWN
TC0600001768.mm.2	Mettl20	-4	0.0293435	0.000442237	TRUE	DOWN
TC0400001010.mm.2	Pgm2	-1.0625	0.0293435	0.000442676	TRUE	DOWN
TC1500001783.mm.2	Slc39a4	-3.345	0.0294823	0.000446098	TRUE	DOWN
TC1300001670.mm.2	Aldh5a1	-1.3425	0.0296013	0.000449232	TRUE	DOWN
TC0500000791.mm.2	Ugt2b35	-1.5575	0.0298288	0.000455371	TRUE	DOWN
TC0400001034.mm.2	Ak4	-1.5575	0.0300592	0.000464302	TRUE	DOWN
TC1500000963.mm.2	Slc48a1	-0.8925	0.0305827	0.000478481	TRUE	DOWN
TC1000003127.mm.2	Hsd17b6	-5.97	0.0305827	0.000479275	TRUE	DOWN
TC1900000931.mm.2	Rbm4; Rbm14; Gm21992	-0.8175	0.0310752	0.000492591	TRUE	DOWN
TC0700001615.mm.2	Akip1	-1.2575	0.0317518	0.000506176	TRUE	DOWN
TC0900001297.mm.2	Slco2a1	-2.6925	0.0319249	0.000512288	TRUE	DOWN
TC1400000777.mm.2	Dhrs4	-1.63	0.0319249	0.000516095	TRUE	DOWN
TC1100001047.mm.2	Cluh	-0.6275	0.0319249	0.000517401	TRUE	DOWN
TC0100002764.mm.2	Ngef	-0.8325	0.0319249	0.000517561	TRUE	DOWN
TC0800002144.mm.2	Klkb1; Cyp4v3	-0.71	0.0322604	0.000528811	TRUE	DOWN
TC0300002554.mm.2	Hsd3b5	-5.535	0.0326213	0.000540355	TRUE	DOWN
TC1200002246.mm.2	Atxn3	-0.845	0.0329844	0.000548105	TRUE	DOWN
TC0900003234.mm.2	Acaa1b	-2.705	0.0331739	0.000552865	TRUE	DOWN
TC1600000981.mm.2	Sod1	-0.7375	0.0333394	0.000560725	TRUE	DOWN
TC0700004165.mm.2	Arl6ip1	-1.44	0.0333394	0.000564724	TRUE	DOWN
TC0900001038.mm.2	Gclc	-2.1925	0.0333394	0.000568386	TRUE	DOWN
TC0500003489.mm.2	Cox19	-1.69	0.0333394	0.000569019	TRUE	DOWN
TC1500000599.mm.2	Adck5	-3.82	0.0340151	0.000589742	TRUE	DOWN
TC0500001526.mm.2	Rabgef1	-1.0475	0.034073	0.000592281	TRUE	DOWN
TC0600001082.mm.2	Hdac11	-1.905	0.0343933	0.000600946	TRUE	DOWN
TC0200005090.mm.2	Oser1	-1.09	0.0346191	0.00060645	TRUE	DOWN
TC0300002959.mm.2	Sgms2	-2.125	0.0347649	0.000610569	TRUE	DOWN
TC0800002594.mm.2	Gcdh	-1.28	0.0348058	0.000612856	TRUE	DOWN
TC1500002147.mm.2	Slc38a4	-0.86	0.0349354	0.000616711	TRUE	DOWN
TC1200000236.mm.2	Adi1	-1.3525	0.0357351	0.000634548	TRUE	DOWN
TC1300000674.mm.2	Txndc15	-1.3225	0.0358384	0.000642335	TRUE	DOWN
TC0100002179.mm.2	Kansl3	-1.0525	0.0359848	0.000647987	TRUE	DOWN
TC1500001430.mm.2	Dpys	-2.0925	0.036276	0.000656713	TRUE	DOWN
TC0400003097.mm.2	Cyp2j6	-0.92	0.0367161	0.000669639	TRUE	DOWN
TC1600000301.mm.2	Vps8	-0.715	0.0372653	0.00068469	TRUE	DOWN
TC1300000264.mm.2	Slc17a2	-1.18	0.03733	0.00068756	TRUE	DOWN
TC0400003267.mm.2	Rnf11	-1.3075	0.0375744	0.00069883	TRUE	DOWN
TC1700000822.mm.2	Ptchd4	-0.6875	0.0384246	0.000718104	TRUE	DOWN
TC1600000387.mm.2	Opa1	-0.7225	0.0389369	0.000730759	TRUE	DOWN
TC0700004409.mm.2	Oat	-4.2475	0.0397141	0.000752932	TRUE	DOWN
TC0900000714.mm.2	Edc3	-0.835	0.0397575	0.000759938	TRUE	DOWN
TC0700002096.mm.2	Slc22a18	-0.9575	0.0397575	0.000760917	TRUE	DOWN
TC1500001832.mm.2	Tmprss6	-0.9875	0.0402583	0.000783194	TRUE	DOWN
TC0400003234.mm.2	Scp2	-3.77	0.0405606	0.000792728	TRUE	DOWN
TC1100003999.mm.2	Abca8a	-5.7325	0.040617	0.000798298	TRUE	DOWN
TC0300001414.mm.2	Adh4	-4.445	0.040617	0.000798969	TRUE	DOWN
TC0900000848.mm.2	Rbpms2	-0.985	0.040617	0.000799316	TRUE	DOWN
TC0400004188.mm.2	Cyp4a32	-2.2525	0.0414426	0.000824208	TRUE	DOWN
TC1500001955.mm.2	Cyp2d40	-0.905	0.0414426	0.000825486	TRUE	DOWN
TC1000000595.mm.2	Pbld2	-1.4375	0.0414426	0.000826761	TRUE	DOWN
TC0200001843.mm.2	Sord	-0.975	0.0414528	0.000830643	TRUE	DOWN
TC0600002616.mm.2	Gm4477	-1.115	0.0414528	0.000834345	TRUE	DOWN
TC1600001352.mm.2	Clcn2	-1.145	0.0415661	0.000838774	TRUE	DOWN
TC0500002690.mm.2	Ugt2b1	-1.9425	0.0418553	0.000853034	TRUE	DOWN
TC0300002553.mm.2	Hsd3b4; Gm10681	-4.4675	0.0425169	0.000875	TRUE	DOWN
TC1700000646.mm.2	Dxo	-1.1775	0.0425274	0.000877819	TRUE	DOWN
TC1100003629.mm.2	Pnpo	-1.3075	0.0427522	0.000885618	TRUE	DOWN
TC0300001413.mm.2	Adh6-ps1	-4.6325	0.0436344	0.000913716	TRUE	DOWN
TC0600001515.mm.2	Clec2h	-4.06	0.0439964	0.00092526	TRUE	DOWN
TC1200000626.mm.2	Ppm1a	-0.785	0.0455663	0.000978796	TRUE	DOWN
TC0400002876.mm.2	Ptprd	-0.9175	0.0458696	0.000991358	TRUE	DOWN
TC1700000567.mm.2	Cyp4f15	-1.48	0.0460808	0.00100228	TRUE	DOWN
TC0X00000209.mm.2	Rgn	-0.825	0.0460808	0.0010023	TRUE	DOWN
TC0300000555.mm.2	Mfsd1	-1.3175	0.0462326	0.00100768	TRUE	DOWN
TC0800003077.mm.2	Galns	-1.1475	0.0464974	0.00101555	TRUE	DOWN
TC0200005220.mm.2	Atp9a	-1.585	0.0465887	0.00101964	TRUE	DOWN
TC0600000980.mm.2	Tgfa	-0.635	0.0471571	0.00103512	TRUE	DOWN
TC1700001621.mm.2	1600002H07Rik	-3.42	0.0471571	0.00103633	TRUE	DOWN
TC1000000708.mm.2	Bcr	-0.79	0.047208	0.00104116	TRUE	DOWN
TC0600001424.mm.2	C1rb	-1.2975	0.0476287	0.0010617	TRUE	DOWN
TC1500001023.mm.2	Gpd1	-1.3675	0.0477334	0.00107049	TRUE	DOWN
TC0600001373.mm.2	Mug1	-1.3	0.0484064	0.0010943	TRUE	DOWN
TC0200002830.mm.2	Prpf6	-1.175	0.048739	0.00110401	TRUE	DOWN
TC1900001481.mm.2	Cyp2c54	-3.6975	0.0489699	0.00112027	TRUE	DOWN
TC1300002196.mm.2	Slc35d2	-1.3625	0.0490018	0.00112762	TRUE	DOWN
TC1100003505.mm.2	Akap1	-1.2875	0.049544	0.00114806	TRUE	DOWN
TC0200003607.mm.2	Rbms1	-0.8325	0.0496333	0.00115333	TRUE	DOWN
TC0600003374.mm.2	Gys2	-1.625	0.0498631	0.00116365	TRUE	DOWN
TC0600003108.mm.2	C1s1	-0.885	0.0498631	0.0011654	TRUE	DOWN
TC0400003456.mm.2	Rlf	-1.5325	0.0500388	0.00117402	TRUE	DOWN
TC1900000212.mm.2	Prpf19	-1.185	0.0502069	0.0011819	TRUE	DOWN
TC0500002713.mm.2	Grsf1	-0.6025	0.0502871	0.00118664	TRUE	DOWN
TC1200000614.mm.2	Daam1	-0.89	0.0503196	0.00119097	TRUE	DOWN
TC1900000866.mm.2	Grk5	-2.635	0.0503196	0.00119193	TRUE	DOWN
TC0200003529.mm.2	Neb	-1.5375	0.0508896	0.00121231	TRUE	DOWN
TC0200003815.mm.2	Zfp385b	-1.0475	0.0509027	0.00121492	TRUE	DOWN
TC0400001509.mm.2	Ak2	-0.8825	0.0514117	0.0012317	TRUE	DOWN
TC0600002351.mm.2	Ppm1k	-2.24	0.0516674	0.00124258	TRUE	DOWN
TC0100001726.mm.2	9130409I23Rik	-3.1425	0.0516674	0.00124303	TRUE	DOWN
TC1800000980.mm.2	Abhd3	-0.775	0.0516674	0.00124504	TRUE	DOWN
TC1100000994.mm.2	Ggt6	-1.2275	0.0516674	0.00124867	TRUE	DOWN
TC1500000568.mm.2	Zfp707	-2.245	0.0517184	0.00125302	TRUE	DOWN
TC0200002885.mm.2	Dhtkd1	-1.7025	0.0517321	0.00125568	TRUE	DOWN
TC1600001316.mm.2	Comt	-1.2725	0.0519296	0.00126495	TRUE	DOWN
TC0100000652.mm.2	Fam134a	-0.9075	0.0519296	0.00126558	TRUE	DOWN
TC0100000039.mm.2	Adhfe1	-1.3175	0.0519296	0.00127184	TRUE	DOWN
TC0600001992.mm.2	Ube2h	-1.19	0.0519296	0.00127383	TRUE	DOWN
TC0300002551.mm.2	Hsd3b4; Gm10681; Gm4450	-5.14	0.0525487	0.00129207	TRUE	DOWN
TC0800001608.mm.2	Insr	-0.73	0.0525568	0.00129463	TRUE	DOWN
TC1000003123.mm.2	Rdh7	-0.6225	0.0529504	0.00131148	TRUE	DOWN
TC0100002965.mm.2	Steap3	-2.54	0.053141	0.00132099	TRUE	DOWN
TC0100001548.mm.2	Tmco1	-0.7325	0.0533687	0.00132905	TRUE	DOWN
TC0500003742.mm.2	Tmem184a	-1.92	0.053445	0.00133336	TRUE	DOWN
TC1800000852.mm.2	Pqlc1	-1.77	0.0535799	0.00134039	TRUE	DOWN
TC0600002658.mm.2	Aplf	-1.125	0.0535799	0.00134237	TRUE	DOWN
TC0400001681.mm.2	Tcea3	-2.1925	0.0543844	0.00136904	TRUE	DOWN
TC0500001302.mm.2	Fbxo21	-2.7875	0.054786	0.00138655	TRUE	DOWN
TC1900000028.mm.2	Tmem134	-0.755	0.0548793	0.00139361	TRUE	DOWN
TC0200000517.mm.2	Gle1	-1.0525	0.0553065	0.00141965	TRUE	DOWN
TC0100002831.mm.2	Mterf4	-1.28	0.0553457	0.00142315	TRUE	DOWN
TC1300000442.mm.2	Dsp	-1.85	0.0558163	0.00144138	TRUE	DOWN
TC0800001955.mm.2	Adrb3	-1.7275	0.0562474	0.00145646	TRUE	DOWN
TC0800001901.mm.2	Adam9	-0.6125	0.0564177	0.00146342	TRUE	DOWN
TC0500002760.mm.2	Scarb2	-0.86	0.0566832	0.00147465	TRUE	DOWN
TC0300001554.mm.2	Cryz	-1.1125	0.0579553	0.00151896	TRUE	DOWN
TC1500000034.mm.2	C9	-2.1675	0.0579567	0.00152161	TRUE	DOWN
TC0800002950.mm.2	Ldhd	-2.2575	0.0588815	0.00155384	TRUE	DOWN
TC1300000626.mm.2	Simc1	-1.2375	0.0588993	0.00155904	TRUE	DOWN
TC0300001176.mm.2	Olfm3	-1.595	0.0588993	0.00155963	TRUE	DOWN
TC0300000896.mm.2	Fam63a	-1.47	0.0588993	0.00156227	TRUE	DOWN
TC1700001618.mm.2	Amdhd2	-1.2625	0.0589109	0.00156788	TRUE	DOWN
TC1000002493.mm.2	Gamt	-1.015	0.0594632	0.00159061	TRUE	DOWN
TC0900000273.mm.2	Zbtb44	-1.39	0.0598275	0.00160305	TRUE	DOWN
TC0800001133.mm.2	Mmp15	-2.015	0.0602744	0.00162448	TRUE	DOWN
TC0400002713.mm.2	Epb41l4b	-2.125	0.0602744	0.00162588	TRUE	DOWN
TC1800000107.mm.2	Cabyr	-1.245	0.0603159	0.00162972	TRUE	DOWN
TC0200004241.mm.2	Hipk3; Mir1902	-1.3025	0.0611211	0.00165423	TRUE	DOWN
TC0800002704.mm.2	Ces1e	-2.8175	0.0614238	0.00166519	TRUE	DOWN
TC1200001921.mm.2	Tmem30b	-1.3075	0.0618952	0.00168464	TRUE	DOWN
TC1700000367.mm.2	Tsr3	-0.795	0.0619222	0.00169264	TRUE	DOWN
TC1000003114.mm.2	Inhbe	-4.025	0.0620899	0.00170002	TRUE	DOWN
TC0400003100.mm.2	Cyp2j9	-3.025	0.0622744	0.00171909	TRUE	DOWN
TC0700000979.mm.2	Mcee	-0.63	0.0626995	0.0017393	TRUE	DOWN
TC1800001521.mm.2	Fam210a; Mir7219	-1.53	0.0632829	0.00176403	TRUE	DOWN
TC0200002632.mm.2	Tshz2	-1.0375	0.0640321	0.0017902	TRUE	DOWN
TC1700000842.mm.2	Enpp5	-1.7875	0.0640321	0.00179348	TRUE	DOWN
TC0200003109.mm.2	Hnmt	-2.08	0.0640321	0.00179907	TRUE	DOWN
TC1100000324.mm.2	Cpeb4	-1.2375	0.0640321	0.00179932	TRUE	DOWN
TC0300002558.mm.2	Hsd3b2	-4.595	0.0640321	0.00180016	TRUE	DOWN
TC1700001644.mm.2	Fahd1	-0.8875	0.0640321	0.00180222	TRUE	DOWN
TC0100000014.mm.2	Atp6v1h	-0.7775	0.0643293	0.00181348	TRUE	DOWN
TC1300001537.mm.2	Zkscan3	-1.3125	0.065343	0.00185258	TRUE	DOWN
TC0600000560.mm.2	Repin1	-0.9225	0.065343	0.00185383	TRUE	DOWN
TC0X00000975.mm.2	Itgb1bp2	-0.8125	0.0653952	0.00185825	TRUE	DOWN
TC0700002023.mm.2	Cyp2e1	-2.1425	0.0654505	0.00186461	TRUE	DOWN
TC1100001908.mm.2	Llgl2	-1.0775	0.065476	0.00187234	TRUE	DOWN
TC1700002314.mm.2	Plin5	-1.1725	0.0656514	0.00188032	TRUE	DOWN
TC0500003088.mm.2	Acads	-1.315	0.0656863	0.00188427	TRUE	DOWN
TC1900001729.mm.2	Shtn1	-1.2725	0.0657321	0.00189151	TRUE	DOWN
TC0X00000363.mm.2	Zbtb33	-0.86	0.0660376	0.00190327	TRUE	DOWN
TC1500001957.mm.2	Cyp2d26	-0.8025	0.0662127	0.00191726	TRUE	DOWN
TC1800000319.mm.2	Cxxc5	-1.5225	0.0662546	0.00192198	TRUE	DOWN
TC1200002535.mm.2	Serpina11	-1.6925	0.0662546	0.00192444	TRUE	DOWN
TC1500002346.mm.2	Plec	-1.2025	0.0666392	0.00193862	TRUE	DOWN
TC0200000060.mm.2	Usp6nl	-1.58	0.0668835	0.00194874	TRUE	DOWN
TC0600003600.mm.2	Cml5	-2.2325	0.0673746	0.00196608	TRUE	DOWN
TC1000002509.mm.2	Mknk2	-1.0175	0.0676269	0.00197649	TRUE	DOWN
TC1400001067.mm.2	Nufip1	-0.72	0.0676986	0.00198185	TRUE	DOWN
TC0400002174.mm.2	Car8	-1.92	0.0676986	0.00198468	TRUE	DOWN
TC0200002136.mm.2	Dstn	-0.8725	0.069377	0.00206911	TRUE	DOWN
TC1800001303.mm.2	Fem1c	-0.76	0.069377	0.00209394	TRUE	DOWN
TC0600002070.mm.2	Mtpn	-0.65	0.069377	0.00209401	TRUE	DOWN
TC1000000131.mm.2	Nhsl1	-1.3975	0.069377	0.0021004	TRUE	DOWN
TC0400001743.mm.2	Akr7a5	-1.315	0.069377	0.00210095	TRUE	DOWN
TC0600003017.mm.2	Adipor2	-0.9675	0.069377	0.00210297	TRUE	DOWN
TC0400004070.mm.2	Park7	-1.09	0.069377	0.00211122	TRUE	DOWN
TC0600003365.mm.2	Slco1a1	-6.3375	0.069377	0.0021159	TRUE	DOWN
TC1600000409.mm.2	Bdh1	-0.9625	0.069377	0.00211847	TRUE	DOWN
TC0600001279.mm.2	Pparg	-2.7375	0.07045	0.00216052	TRUE	DOWN
TC1200002049.mm.2	Zfyve1	-0.9175	0.0704998	0.00216522	TRUE	DOWN
TC0400002454.mm.2	Bag1	-0.77	0.0705052	0.00217173	TRUE	DOWN
TC1100001054.mm.2	Smg6	-0.9825	0.0708342	0.00219144	TRUE	DOWN
TC0X00003043.mm.2	Slc25a53	-0.77	0.0709144	0.00220693	TRUE	DOWN
TC0300002955.mm.2	Hadh	-0.66	0.0709144	0.00220989	TRUE	DOWN
TC1900001619.mm.2	Pcgf6	-1.255	0.0712469	0.00222852	TRUE	DOWN
TC0600002644.mm.2	Anxa4	-0.7875	0.0712469	0.00223629	TRUE	DOWN
TC0300000095.mm.2	Car3	-5.29	0.0715368	0.00225707	TRUE	DOWN
TC1000002658.mm.2	Slc17a8	-1.5825	0.0723925	0.00229754	TRUE	DOWN
TC1100004250.mm.2	Wdr45b	-0.7075	0.0723925	0.0022992	TRUE	DOWN
TC1500000569.mm.2	Mapk15	-1.29	0.0732005	0.00234243	TRUE	DOWN
TC0200000037.mm.2	Phyh	-0.9275	0.0732982	0.00235349	TRUE	DOWN
TC1800000794.mm.2	Acaa2	-1.1975	0.0733642	0.00236616	TRUE	DOWN
TC1800001049.mm.2	Trappc8	-0.9725	0.0733642	0.00236892	TRUE	DOWN
TC0X00000160.mm.2	Usp9x	-0.5825	0.0733642	0.00238347	TRUE	DOWN
TC1100001875.mm.2	Ttyh2	-0.7825	0.0733642	0.00238348	TRUE	DOWN
TC1400000783.mm.2	Fitm1	-1.73	0.0733642	0.00238836	TRUE	DOWN
TC0X00000110.mm.2	Xk	-0.9	0.0733642	0.0023908	TRUE	DOWN
TC1700000009.mm.2	Tiam2	-1.83	0.0733642	0.002393	TRUE	DOWN
TC0400000353.mm.2	Chmp5	-0.7025	0.0733642	0.0024005	TRUE	DOWN
TC0200001030.mm.2	Dcaf17	-0.74	0.0733642	0.00240391	TRUE	DOWN
TC0200004690.mm.2	Hao1	-2.07	0.0733642	0.002404	TRUE	DOWN
TC1800000188.mm.2	Zfp397	-0.7675	0.0733642	0.00240532	TRUE	DOWN
TC1100000859.mm.2	Gas7	-1.13	0.0733642	0.00241954	TRUE	DOWN
TC0100002332.mm.2	Pms1	-1.0675	0.0733642	0.00242169	TRUE	DOWN
TC1100001183.mm.2	Rab11fip4	-1.3025	0.0733831	0.00242619	TRUE	DOWN
TC0300000643.mm.2	Plrg1	-0.945	0.0733831	0.00243282	TRUE	DOWN
TC0300003182.mm.2	Fpgt	-0.635	0.0733831	0.00243941	TRUE	DOWN
TC0200003214.mm.2	Sardh	-1.19	0.073927	0.00247355	TRUE	DOWN
TC1300001033.mm.2	Dhfr	-0.88	0.0739986	0.00248261	TRUE	DOWN
TC0500001179.mm.2	Tpst2	-1.7925	0.074059	0.00248798	TRUE	DOWN
TC1100002567.mm.2	Pttg1	-0.8875	0.0742116	0.00249644	TRUE	DOWN
TC1900000897.mm.2	Gstp2	-2.285	0.0745906	0.00251591	TRUE	DOWN
TC1200001364.mm.2	Fam228b	-0.8275	0.0751943	0.00255321	TRUE	DOWN
TC1300002445.mm.2	Scamp1	-1.7925	0.0753975	0.0025635	TRUE	DOWN
TC1800000609.mm.2	F830016B08Rik	-1.22	0.0761272	0.00260291	TRUE	DOWN
TC1400000177.mm.2	Vcl	-1.2775	0.0761272	0.00260357	TRUE	DOWN
TC0300000668.mm.2	Gatb	-0.7525	0.0761272	0.00260421	TRUE	DOWN
TC0X00001781.mm.2	Magix	-0.975	0.0761446	0.00261696	TRUE	DOWN
TC0100000386.mm.2	Ormdl1	-1.5825	0.0761446	0.00262357	TRUE	DOWN
TC0100002600.mm.2	Cnppd1	-1.4425	0.0761446	0.00262462	TRUE	DOWN
TC0400003237.mm.2	Zyg11b	-0.67	0.0761446	0.00262662	TRUE	DOWN
TC0900001349.mm.2	Pcbp4	-0.915	0.0764702	0.00265083	TRUE	DOWN
TC0400001387.mm.2	Trit1	-1.4	0.0768406	0.00266809	TRUE	DOWN
TC0300001244.mm.2	Gclm	-1.295	0.0768406	0.00267632	TRUE	DOWN
TC1400001655.mm.2	Il17rb	-3.04	0.0768406	0.00268136	TRUE	DOWN
TC0400001087.mm.2	C8b	-3.8375	0.0768406	0.00268524	TRUE	DOWN
TC0200003098.mm.2	Abi1	-0.7925	0.076956	0.0026962	TRUE	DOWN
TC1700001693.mm.2	Fam234a	-1.08	0.0769995	0.00270119	TRUE	DOWN
TC1700000500.mm.2	BC004004	-0.5825	0.0773577	0.00271853	TRUE	DOWN
TC0500001936.mm.2	Crot	-2.065	0.0773577	0.00272316	TRUE	DOWN
TC1300002201.mm.2	Aaed1	-1.2	0.0773577	0.00272421	TRUE	DOWN
TC0200001826.mm.2	Casc4	-1.13	0.0776103	0.0027366	TRUE	DOWN
TC0600002480.mm.2	Atoh8	-0.8475	0.0781227	0.0027638	TRUE	DOWN
TC1500000760.mm.2	Cyp2d12	-2.4325	0.0783141	0.00278913	TRUE	DOWN
TC0800001531.mm.2	Rhou	-1.96	0.0783141	0.00278963	TRUE	DOWN
TC1000000056.mm.2	Zc3h12d	-0.83	0.0784716	0.0028023	TRUE	DOWN
TC0400001090.mm.2	1700024P16Rik	-1.75	0.0785118	0.00280728	TRUE	DOWN
TC0800001883.mm.2	Gpat4	-1.5325	0.0785329	0.00281157	TRUE	DOWN
TC0500002696.mm.2	Ugt2b38	-1.395	0.0785725	0.00282208	TRUE	DOWN
TC1100002225.mm.2	Ddc	-2.17	0.0785725	0.0028236	TRUE	DOWN
TC0900000833.mm.2	Parp16	-1.5525	0.0786054	0.00282836	TRUE	DOWN
TC1500001090.mm.2	Soat2	-1.3175	0.0787137	0.0028464	TRUE	DOWN
TC1000000133.mm.2	Perp	-0.8175	0.0787661	0.00285335	TRUE	DOWN
TC1500002176.mm.2	Kansl2	-0.965	0.0787661	0.00285552	TRUE	DOWN
TC1700002185.mm.2	Klhdc3	-1.2175	0.0787661	0.00285893	TRUE	DOWN
TC0900000223.mm.2	Bbs9	-1.3575	0.0788817	0.00287551	TRUE	DOWN
TC0X00002556.mm.2	Gk	-1.0825	0.0788817	0.00289276	TRUE	DOWN
TC0800003163.mm.2	Abcb10	-1.3825	0.0788817	0.0028962	TRUE	DOWN
TC0400001720.mm.2	Hp1bp3	-0.7425	0.0788817	0.00289865	TRUE	DOWN
TC1500000567.mm.2	Zfp623	-0.7025	0.0790354	0.00291158	TRUE	DOWN
TC1300001096.mm.2	Gcnt4	-0.89	0.0790354	0.00291715	TRUE	DOWN
TC1100002030.mm.2	Slc25a10	-1.2875	0.0790354	0.00291891	TRUE	DOWN
TC0100003155.mm.2	Nr5a2	-1.13	0.0790354	0.00293272	TRUE	DOWN
TC0800001200.mm.2	Ces3a	-0.965	0.0790354	0.00293277	TRUE	DOWN
TC0100003186.mm.2	Cfhr1	-0.9575	0.0790874	0.00293979	TRUE	DOWN
TC0600002763.mm.2	Magi1	-1.0175	0.0790874	0.00294182	TRUE	DOWN
TC0900000674.mm.2	Tmem266	-0.595	0.079203	0.00294969	TRUE	DOWN
TC1500000221.mm.2	Sdc2	-1.935	0.0792927	0.00296018	TRUE	DOWN
TC0300000258.mm.2	Atp11b	-0.9275	0.0795772	0.00297796	TRUE	DOWN
TC0700003009.mm.2	Nucb1	-0.9575	0.0806726	0.0030346	TRUE	DOWN
TC0800002705.mm.2	Ces1f	-3.9625	0.0806726	0.00304018	TRUE	DOWN
TC0100000778.mm.2	2810459M11Rik	-0.9225	0.0809816	0.00305849	TRUE	DOWN
TC1700001857.mm.2	Cyp4f13	-0.96	0.0809816	0.00305969	TRUE	DOWN
TC1400001054.mm.2	Lcp1	-0.8725	0.0811674	0.00307453	TRUE	DOWN
TC0900002292.mm.2	Fdx1	-1.17	0.0811674	0.00308287	TRUE	DOWN
TC0900000876.mm.2	Rps27l	-0.975	0.0811674	0.00308499	TRUE	DOWN
TC1400002090.mm.2	Emc9	-1.965	0.0814079	0.00310513	TRUE	DOWN
TC0300001582.mm.2	Lrrc40	-0.6475	0.0814801	0.00311155	TRUE	DOWN
TC0800000111.mm.2	Atp11a	-0.8725	0.0815496	0.00312322	TRUE	DOWN
TC1600000150.mm.2	Mkl2	-0.6975	0.0815496	0.00313398	TRUE	DOWN
TC1100004107.mm.2	Acox1	-1.455	0.0815496	0.00313548	TRUE	DOWN
TC1700001847.mm.2	Zfp871	-1.2775	0.0815496	0.00313858	TRUE	DOWN
TC0100001533.mm.2	Ildr2	-1.66	0.0815496	0.00314164	TRUE	DOWN
TC1900000636.mm.2	Abcc2	-0.6	0.0815496	0.00316823	TRUE	DOWN
TC0500001181.mm.2	Hps4	-0.7925	0.0815496	0.00317664	TRUE	DOWN
TC0600002460.mm.2	Thnsl2	-0.935	0.0819802	0.00320888	TRUE	DOWN
TC0400002779.mm.2	Mup20	-3.5175	0.0819802	0.00321556	TRUE	DOWN
TC0700002033.mm.2	Athl1	-0.6125	0.0819823	0.00321933	TRUE	DOWN
TC0200001362.mm.2	Celf1	-0.8825	0.0819833	0.00322307	TRUE	DOWN
TC0X00002482.mm.2	Pls3	-1.0775	0.0820713	0.00323022	TRUE	DOWN
TC0800000974.mm.2	Prdx2	-0.705	0.0831087	0.00328033	TRUE	DOWN
TC1000000760.mm.2	Pttg1ip	-0.86	0.0831087	0.00328545	TRUE	DOWN
TC0500000837.mm.2	5830473C10Rik	-2.805	0.0831714	0.00329225	TRUE	DOWN
TC0300000416.mm.2	Spg20	-0.925	0.0841571	0.00334642	TRUE	DOWN
TC1100002366.mm.2	1700093K21Rik	-0.9775	0.0842163	0.00335377	TRUE	DOWN
TC0800002852.mm.2	Esrp2	-0.91	0.0842163	0.00335792	TRUE	DOWN
TC0500001673.mm.2	Gpr146; D830046C22Rik	-1.1175	0.0842163	0.00336774	TRUE	DOWN
TC0900002526.mm.2	Usp3	-1.295	0.0842163	0.00337518	TRUE	DOWN
TC0400002084.mm.2	Ssu72	-0.71	0.0842163	0.00337912	TRUE	DOWN
TC0600001813.mm.2	Slc25a13	-2.0625	0.0845955	0.00339814	TRUE	DOWN
TC0800002369.mm.2	Zfp869	-0.9575	0.0850244	0.00343382	TRUE	DOWN
TC0600001672.mm.2	Slco1b2	-2.105	0.0851984	0.00345306	TRUE	DOWN
TC0700000903.mm.2	Htatip2	-0.82	0.0858225	0.00348994	TRUE	DOWN
TC1800000152.mm.2	Dsg1c	-1.295	0.0859342	0.00351771	TRUE	DOWN
TC1600001559.mm.2	Fam162a	-1.11	0.0859785	0.00352339	TRUE	DOWN
TC0900000748.mm.2	Hexa	-0.885	0.0862847	0.00354371	TRUE	DOWN
TC0900001455.mm.2	Cspg5	-1.575	0.0865428	0.0035699	TRUE	DOWN
TC0800002848.mm.2	Ddx28	-0.725	0.0867715	0.00359496	TRUE	DOWN
TC1800000314.mm.2	Paip2	-0.8575	0.0870167	0.00361688	TRUE	DOWN
TC0400003184.mm.2	C8a	-5.375	0.0870816	0.0036235	TRUE	DOWN
TC1100000756.mm.2	Alkbh5	-0.865	0.0878144	0.00366981	TRUE	DOWN
TC0100002470.mm.2	Fzd5	-1.2925	0.0883664	0.00370083	TRUE	DOWN
TC0800000482.mm.2	Slc7a2	-2.2875	0.0884914	0.00372015	TRUE	DOWN
TC1400002100.mm.2	Dhrs1	-0.8775	0.0884914	0.00372201	TRUE	DOWN
TC0500003638.mm.2	Ubl3	-0.9025	0.0892358	0.00375734	TRUE	DOWN
TC0700001709.mm.2	Acsm5	-0.9325	0.089361	0.00376664	TRUE	DOWN
TC0700004474.mm.2	Bnip3	-1.7125	0.0894902	0.00378014	TRUE	DOWN
TC0500002154.mm.2	Hadha	-0.9225	0.0896485	0.00379087	TRUE	DOWN
TC0100001877.mm.2	Plxna2	-1.635	0.0907087	0.00384387	TRUE	DOWN
TC0300001221.mm.2	Dpyd	-1.87	0.0911626	0.0038735	TRUE	DOWN
TC0200001201.mm.2	Zc3h15	-0.7375	0.0917445	0.00391055	TRUE	DOWN
TC0100001550.mm.2	Aldh9a1	-1.16	0.0917445	0.0039401	TRUE	DOWN
TC0500003318.mm.2	Sbds	-1.04	0.0918237	0.00397116	TRUE	DOWN
TC1600000487.mm.2	Mylk	-0.73	0.0918237	0.00397795	TRUE	DOWN
TC1100002664.mm.2	Sqstm1	-0.775	0.0918356	0.00398549	TRUE	DOWN
TC0400003163.mm.2	Gm12790	-0.6425	0.0918356	0.0039909	TRUE	DOWN
TC0100001607.mm.2	Dcaf8	-0.84	0.0922206	0.00401591	TRUE	DOWN
TC1200001722.mm.2	Hectd1	-1.1025	0.0932976	0.00408382	TRUE	DOWN
TC0200003590.mm.2	Wdsub1	-1.225	0.0937353	0.0041072	TRUE	DOWN
TC0500002488.mm.2	Smim14	-0.6025	0.0937471	0.00411194	TRUE	DOWN
TC0300003103.mm.2	Dnase2b	-2.27	0.0938187	0.0041193	TRUE	DOWN
TC1700002333.mm.2	Lonp1	-0.9825	0.0945085	0.00416661	TRUE	DOWN
TC0200002476.mm.2	Sgk2	-2.4075	0.0945107	0.00417854	TRUE	DOWN
TC0200002178.mm.2	Xrn2	-0.605	0.0946103	0.00419666	TRUE	DOWN
TC0300001104.mm.2	Dram2	-0.8975	0.0948624	0.00421876	TRUE	DOWN
TC1100000161.mm.2	Egfr	-2.0275	0.0948681	0.00423373	TRUE	DOWN
TC0500000723.mm.2	Exoc1	-0.895	0.0949597	0.00424478	TRUE	DOWN
TC1200002077.mm.2	Entpd5	-1.3525	0.0949597	0.00425065	TRUE	DOWN
TC1600002168.mm.2	Vasn	-1.0775	0.0950309	0.00425811	TRUE	DOWN
TC0900002480.mm.2	Smad3	-1.1425	0.0950634	0.00426385	TRUE	DOWN
TC0300000880.mm.2	Selenbp1	-1.1925	0.0951771	0.00427439	TRUE	DOWN
TC0400000580.mm.2	Slc44a1	-0.98	0.0952382	0.00428753	TRUE	DOWN
TC1700000315.mm.2	Hcfc1r1	-1.1725	0.0952382	0.00428885	TRUE	DOWN
TC0100003483.mm.2	Mgst3	-1.5025	0.0952862	0.0042953	TRUE	DOWN
TC0400003423.mm.2	Ccdc30	-0.915	0.0957196	0.00432346	TRUE	DOWN
TC0700002924.mm.2	Zfp141	-0.9	0.0957472	0.00432902	TRUE	DOWN
TC1300000462.mm.2	Pak1ip1	-0.81	0.0961032	0.0043581	TRUE	DOWN
TC1300001374.mm.2	Net1	-0.8825	0.0962835	0.00437111	TRUE	DOWN
TC1600000763.mm.2	Cpox	-1.265	0.0967466	0.00440906	TRUE	DOWN
TC1800001122.mm.2	Proc	-1.0425	0.0970118	0.00442988	TRUE	DOWN
TC0900003276.mm.2	Cyp8b1	-0.58	0.0970275	0.0044398	TRUE	DOWN
TC1400002711.mm.2	Tgds	-0.69	0.0970275	0.00444216	TRUE	DOWN
TC1300000443.mm.2	Snrnp48	-0.6225	0.0971159	0.00445651	TRUE	DOWN
TC0600003367.mm.2	Gm6614	-1.1025	0.0973783	0.00447293	TRUE	DOWN
TC0200002261.mm.2	Nsfl1c	-0.7525	0.0980972	0.00451921	TRUE	DOWN
TC0500001692.mm.2	Eif3b	-0.605	0.0990916	0.0045784	TRUE	DOWN
TC1600002158.mm.2	C2cd2	-1.2175	0.0992066	0.00458818	TRUE	DOWN
TC0400003590.mm.2	Rbbp4	-1.525	0.0994422	0.00460356	TRUE	DOWN
TC0600001296.mm.2	44263	-1.6625	0.099813	0.00463815	TRUE	DOWN
TC1600001047.mm.2	Dopey2	-1.2125	0.099813	0.00464115	TRUE	DOWN
TC0900001692.mm.2	Aasdhppt	-0.8375	0.099813	0.00464167	TRUE	DOWN

## Sheet: Sheet 2
ID	Gene.Symbol	Fold Change	p value (FDR)	p value	Significance	Status
TC0500003596.mm.2	Cyp3a16	10.85	0.00102555	2.1855e-07	TRUE	UP
TC1300001377.mm.2	Akr1c18	11.5975	0.00102555	3.24655e-07	TRUE	UP
TC0900001900.mm.2	Acp5	2.19	0.00102555	4.54154e-07	TRUE	UP
TC0900001128.mm.2	Nt5e	4.9575	0.00102555	4.61833e-07	TRUE	UP
TC0400000961.mm.2	Fggy	1.525	0.00217279	1.57788e-06	TRUE	UP
TC1900001057.mm.2	Slc22a27	8.1825	0.00217279	1.70635e-06	TRUE	UP
TC1200002506.mm.2	Dnah11	6.505	0.00217279	1.73983e-06	TRUE	UP
TC0800003091.mm.2	Sult5a1	4.635	0.00237355	2.13501e-06	TRUE	UP
TC0X00002158.mm.2	Zdhhc9	0.755	0.00237355	2.20674e-06	TRUE	UP
TC0600003433.mm.2	Itpr2	1.2175	0.00297846	3.21909e-06	TRUE	UP
TC0900000560.mm.2	Apoa4	4.43	0.00308015	3.62968e-06	TRUE	UP
TC1000002814.mm.2	Acss3	2.625	0.00308015	3.74512e-06	TRUE	UP
TC0900001726.mm.2	Cep126	7.395	0.00381568	5.29109e-06	TRUE	UP
TC1600000564.mm.2	Igsf11	1.525	0.00381568	5.32677e-06	TRUE	UP
TC1000003226.mm.2	Gstt3	5.22	0.00401133	5.78053e-06	TRUE	UP
TC1900001425.mm.2	Slc16a12	1.4175	0.00417714	6.20759e-06	TRUE	UP
TC0200000868.mm.2	Gpd2	2.525	0.00426467	6.66102e-06	TRUE	UP
TC1700002573.mm.2	Atl2	1.6625	0.00426467	6.72176e-06	TRUE	UP
TC0100003505.mm.2	Hsd17b7	2.4075	0.00540872	9.89027e-06	TRUE	UP
TC0500001894.mm.2	Cyp51	2.3275	0.00543984	1.04482e-05	TRUE	UP
TC0100003401.mm.2	Fmo1	1.36	0.00543984	1.14188e-05	TRUE	UP
TC0900001459.mm.2	Scap	1.2	0.00604433	1.30653e-05	TRUE	UP
TC1100002897.mm.2	Shmt1	1.995	0.00724004	1.85843e-05	TRUE	UP
TC1300000045.mm.2	Idi1	2.43	0.0076768	2.03968e-05	TRUE	UP
TC0200005317.mm.2	Slmo2	2.145	0.00820058	2.21577e-05	TRUE	UP
TC0100000333.mm.2	Bivm	1.2925	0.00848694	2.48424e-05	TRUE	UP
TC0700002655.mm.2	Cyp2a22	4.845	0.0086027	2.59561e-05	TRUE	UP
TC1600001639.mm.2	Gramd1c	2.125	0.00892887	2.86955e-05	TRUE	UP
TC1100001149.mm.2	Rab34	2.4225	0.00892887	2.89507e-05	TRUE	UP
TC0300001641.mm.2	Fabp12	3.8725	0.00896611	2.9879e-05	TRUE	UP
TC1000002383.mm.2	Gstt1	3.3275	0.00903936	3.11465e-05	TRUE	UP
TC0200005184.mm.2	Ptgis	2.3825	0.010407	3.88985e-05	TRUE	UP
TC0X00001024.mm.2	Chic1	3.195	0.0122403	4.68534e-05	TRUE	UP
TC0100001510.mm.2	Dpt	1.2025	0.0125194	4.90492e-05	TRUE	UP
TC0900000659.mm.2	Idh3a	2.775	0.0131098	5.25431e-05	TRUE	UP
TC0500002944.mm.2	Atp5k	1.0275	0.0132172	5.44703e-05	TRUE	UP
TC1500001450.mm.2	Angpt1	3.1025	0.0132172	5.47593e-05	TRUE	UP
TC1400001898.mm.2	Ero1l	1.1525	0.0140925	6.02893e-05	TRUE	UP
TC0100000706.mm.2	Col4a3	5.9	0.0143284	6.25892e-05	TRUE	UP
TC0800001871.mm.2	Vdac3	0.705	0.0146894	6.48278e-05	TRUE	UP
TC1900000090.mm.2	Slc25a45	2.565	0.0148685	6.69572e-05	TRUE	UP
TC0200005123.mm.2	Wfdc16	2.8725	0.0157842	7.3213e-05	TRUE	UP
TC0400001974.mm.2	Eno1; Eno1b	1.12	0.0160711	7.56639e-05	TRUE	UP
TC0100002816.mm.2	Myeov2	0.7525	0.0160711	7.59912e-05	TRUE	UP
TC0500002219.mm.2	Letm1	1.675	0.0161747	7.79379e-05	TRUE	UP
TC1300002079.mm.2	Cxcl14	2.0625	0.0172472	8.39109e-05	TRUE	UP
TC0400001325.mm.2	Slc2a1	0.9575	0.0172472	8.46595e-05	TRUE	UP
TC1200001981.mm.2	Rdh11	2.47	0.0177577	8.92807e-05	TRUE	UP
TC0500003599.mm.2	Cyp3a44	3.99	0.0178576	9.08724e-05	TRUE	UP
TC1300001641.mm.2	Hfe	0.74	0.0185219	9.5087e-05	TRUE	UP
TC0100002969.mm.2	Insig2	1.6825	0.0188985	9.81745e-05	TRUE	UP
TC0400001514.mm.2	Fndc5	2.07	0.0190148	0.000100186	TRUE	UP
TC0800002665.mm.2	Sall1	2.1875	0.0195041	0.000104521	TRUE	UP
TC0600000359.mm.2	Akr1d1	2.09	0.0197405	0.000106677	TRUE	UP
TC0600000362.mm.2	Trim24	4.47	0.0198516	0.000108171	TRUE	UP
TC0400002079.mm.2	Nadk	1.555	0.0200182	0.00010998	TRUE	UP
TC0400000913.mm.2	Mtap	1.09	0.0201957	0.000111865	TRUE	UP
TC1200002434.mm.2	Akt1	1.3825	0.0209299	0.00011901	TRUE	UP
TC0600000182.mm.2	Cped1	1.6925	0.0209299	0.000120644	TRUE	UP
TC0400002634.mm.2	Acnat1	2.525	0.0215321	0.000125085	TRUE	UP
TC0300001229.mm.2	Alg14	0.79	0.0218663	0.000128176	TRUE	UP
TC1600002166.mm.2	Naa60	0.72	0.0218663	0.000128996	TRUE	UP
TC0500002694.mm.2	Ugt2b37	4.565	0.0230023	0.000137423	TRUE	UP
TC0900002738.mm.2	Tmem30a	0.795	0.0230023	0.000139841	TRUE	UP
TC0100000372.mm.2	Sdpr	2.85	0.0235015	0.000144993	TRUE	UP
TC1100003990.mm.2	Slc16a6	1.7425	0.0237689	0.000148783	TRUE	UP
TC1000000566.mm.2	Lrrc20	0.805	0.023982	0.000151197	TRUE	UP
TC1700002692.mm.2	Calm2	1.09	0.0240937	0.000152986	TRUE	UP
TC0600002027.mm.2	Chchd3	0.9525	0.0245061	0.000158916	TRUE	UP
TC0900001768.mm.2	Endod1	1.2825	0.0256805	0.000175511	TRUE	UP
TC0100001365.mm.2	Colgalt2	3.3575	0.0256805	0.000175783	TRUE	UP
TC1000001701.mm.2	Ginm1	2.345	0.0259012	0.000179626	TRUE	UP
TC0200000245.mm.2	Mrc1	1.1275	0.0274069	0.000192537	TRUE	UP
TC1900001767.mm.2	Slc22a29	3.2475	0.0274882	0.000194346	TRUE	UP
TC0300001137.mm.2	Sort1	2.01	0.0279786	0.000200333	TRUE	UP
TC1700002788.mm.2	H2-Q8; H2-Q6	1.065	0.028636	0.000208909	TRUE	UP
TC0800002313.mm.2	Msmo1	1.88	0.0301556	0.000224069	TRUE	UP
TC1000003225.mm.2	Ddt	0.8425	0.0304136	0.000227355	TRUE	UP
TC1700000836.mm.2	Cyp39a1	3.46	0.0305246	0.000230115	TRUE	UP
TC1700002655.mm.2	Abcg5	3.1125	0.0305378	0.00023241	TRUE	UP
TC1400001747.mm.2	Ghitm	0.68	0.0313575	0.000243457	TRUE	UP
TC1200001663.mm.2	Ifrd1	2.225	0.0313575	0.000246539	TRUE	UP
TC1900000317.mm.2	Rfk	2.275	0.0313575	0.000250991	TRUE	UP
TC0800000526.mm.2	Lrp2bp	2.2575	0.0313575	0.00025171	TRUE	UP
TC0300001446.mm.2	Gbp3	5.3325	0.0313867	0.000254418	TRUE	UP
TC1000003140.mm.2	Coq10a	1.7625	0.0315606	0.000259252	TRUE	UP
TC1200001296.mm.2	Zfp386	0.96	0.0315606	0.000267949	TRUE	UP
TC1800001307.mm.2	Cdo1	0.5975	0.0318122	0.000273626	TRUE	UP
TC1400001906.mm.2	Ddhd1; Mir5131	3.04	0.0320304	0.000283026	TRUE	UP
TC0900002321.mm.2	Cib2	1.9075	0.0320304	0.000284157	TRUE	UP
TC1900000586.mm.2	Lcor	0.7025	0.0327174	0.000292957	TRUE	UP
TC1100001150.mm.2	Proca1	1.1575	0.0331693	0.000305511	TRUE	UP
TC1700002791.mm.2	H2-Q1	2.32	0.0331693	0.00030737	TRUE	UP
TC0500002699.mm.2	Sult1d1	2.83	0.0331693	0.000308107	TRUE	UP
TC0900003182.mm.2	Stt3b	1.1025	0.0331693	0.00030812	TRUE	UP
TC1900000467.mm.2	Papss2	3.495	0.0331693	0.000310692	TRUE	UP
TC1100003920.mm.2	Cd79b	1.77	0.0358664	0.000339185	TRUE	UP
TC0500002415.mm.2	Sepsecs	1.375	0.0365764	0.000357429	TRUE	UP
TC0200000013.mm.2	Fam107b	1.6575	0.0376612	0.000371423	TRUE	UP
TC0900002510.mm.2	Slc51b	2.9725	0.0378849	0.000375334	TRUE	UP
TC1600002152.mm.2	Tmprss2	2.6775	0.0384433	0.00038433	TRUE	UP
TC0500001225.mm.2	Mvk	1.7075	0.0392585	0.000397783	TRUE	UP
TC0100001175.mm.2	Pm20d1	1.2175	0.0393234	0.000400211	TRUE	UP
TC1000002050.mm.2	Fig4	0.6525	0.0394191	0.000402961	TRUE	UP
TC1900001765.mm.2	Vps51; Tm7sf2	1.82	0.0401348	0.000415408	TRUE	UP
TC0400000349.mm.2	Dnaja1; Mir207	1.2625	0.0401348	0.000417454	TRUE	UP
TC0100001387.mm.2	Glul; Mir8114	0.7625	0.0401348	0.000419317	TRUE	UP
TC1400001930.mm.2	Gch1	1.945	0.0401348	0.000420875	TRUE	UP
TC0100002392.mm.2	Trak2	1.175	0.0401348	0.000421121	TRUE	UP
TC0X00001682.mm.2	Gpm6b	0.76	0.0403172	0.00042485	TRUE	UP
TC0700002049.mm.2	Taldo1	0.91	0.0407615	0.000435039	TRUE	UP
TC1400001002.mm.2	Nudt18	2.435	0.0409753	0.000441011	TRUE	UP
TC0700002359.mm.2	Chmp2a	0.65	0.0410413	0.000443569	TRUE	UP
TC1300001353.mm.2	Hmgcs1	2.3175	0.0420987	0.00045879	TRUE	UP
TC0500003745.mm.2	Cyp3a41a	8.42	0.0438648	0.000482253	TRUE	UP
TC0700000997.mm.2	Lins1	0.6575	0.0441677	0.000492064	TRUE	UP
TC0400001450.mm.2	Mrps15	0.7475	0.0441677	0.000493272	TRUE	UP
TC0900002780.mm.2	Me1	2.8775	0.0444738	0.000500696	TRUE	UP
TC0800001396.mm.2	Bco1	2.11	0.0454745	0.000524249	TRUE	UP
TC1400002649.mm.2	Rnf219	0.84	0.0454904	0.000526481	TRUE	UP
TC0800001050.mm.2	Chd9	0.8875	0.047677	0.00056534	TRUE	UP
TC1100002233.mm.2	Cobl	1.5025	0.047677	0.000566817	TRUE	UP
TC0400001530.mm.2	Ptp4a2	0.82	0.0477298	0.000570781	TRUE	UP
TC1500001606.mm.2	Fam84b	1.9025	0.0478499	0.000580955	TRUE	UP
TC0500003632.mm.2	Slc46a3	1.6625	0.0478499	0.000581352	TRUE	UP
TC0500003532.mm.2	Mmd2	6.67	0.048723	0.000595105	TRUE	UP
TC1400002091.mm.2	Psme2	0.8925	0.04976	0.000616575	TRUE	UP
TC1100001634.mm.2	Atp6v0a1	0.8775	0.04976	0.000617625	TRUE	UP
TC0300000766.mm.2	Pmvk	2.26	0.04976	0.000619224	TRUE	UP
TC0800001207.mm.2	D230025D16Rik	1.445	0.050051	0.000629382	TRUE	UP
TC0800000623.mm.2	Fbxo8	0.645	0.050051	0.000631103	TRUE	UP
TC0400003842.mm.2	Minos1	0.6425	0.0501042	0.000637169	TRUE	UP
TC1100002575.mm.2	Adra1b	1.7225	0.0501042	0.000641117	TRUE	UP
TC0500000536.mm.2	Slc34a2	4.8075	0.0501042	0.000641157	TRUE	UP
TC0500002919.mm.2	Tgfbr3	1.195	0.0508669	0.000657153	TRUE	UP
TC0800001255.mm.2	Cdh1	1.8175	0.0516581	0.000679283	TRUE	UP
TC0100002203.mm.2	Coa5	0.705	0.0540458	0.00072285	TRUE	UP
TC0800003059.mm.2	Slc7a5	1.5425	0.0543925	0.000733776	TRUE	UP
TC1100004270.mm.2	Tlcd2	3.375	0.0543925	0.000734835	TRUE	UP
TC1800001595.mm.2	Lipg	1.7325	0.0548457	0.000743427	TRUE	UP
TC0300000307.mm.2	Hspa4l	1.6225	0.0565423	0.000788415	TRUE	UP
TC1100001115.mm.2	Ssh2	1.26	0.0565423	0.000793201	TRUE	UP
TC1700000513.mm.2	Zfand3	0.8375	0.0565423	0.000795253	TRUE	UP
TC0200004711.mm.2	Mkks	0.6675	0.0565423	0.000796883	TRUE	UP
TC0100002576.mm.2	Tns1	1.2125	0.0565423	0.00079914	TRUE	UP
TC1100002015.mm.2	Baiap2	2.4175	0.0565423	0.000800632	TRUE	UP
TC0100003203.mm.2	Trove2	0.8725	0.0565423	0.000802073	TRUE	UP
TC0200004130.mm.2	Dgkz	0.6675	0.0573694	0.000817454	TRUE	UP
TC1100001632.mm.2	Stat5a	1.455	0.0573694	0.000818973	TRUE	UP
TC1600000249.mm.2	Cldn5	0.6425	0.0579816	0.000830323	TRUE	UP
TC1700002175.mm.2	Slc22a7	8.1325	0.0581895	0.000845626	TRUE	UP
TC0400002633.mm.2	Acnat2	2.3575	0.0581895	0.000850053	TRUE	UP
TC1400001487.mm.2	Rarb	3.32	0.0581895	0.000851644	TRUE	UP
TC1600001604.mm.2	Pla1a	1.08	0.0582414	0.000855025	TRUE	UP
TC0500002596.mm.2	Sgcb	1.08	0.0584406	0.000863256	TRUE	UP
TC0400000446.mm.2	Npr2	1.3925	0.0584406	0.000869572	TRUE	UP
TC1800000965.mm.2	Gm17430	1.4	0.0584406	0.000874543	TRUE	UP
TC0100002481.mm.2	Idh1	0.64	0.0584406	0.000878103	TRUE	UP
TC1600002177.mm.2	Dexi	1.585	0.0584406	0.000879004	TRUE	UP
TC1900000709.mm.2	As3mt	1.8375	0.0588858	0.000888352	TRUE	UP
TC0400003200.mm.2	Pcsk9	1.28	0.0596385	0.000904713	TRUE	UP
TC0500002651.mm.2	Igfbp7	1.095	0.0599321	0.000916625	TRUE	UP
TC1900000160.mm.2	Bscl2	0.96	0.0599321	0.000927743	TRUE	UP
TC0800003069.mm.2	Mvd	2.8175	0.0600442	0.000935571	TRUE	UP
TC0400003675.mm.2	Atpif1	1.6925	0.0624484	0.000984281	TRUE	UP
TC1900000987.mm.2	Frmd8	2.26	0.0631087	0.00100606	TRUE	UP
TC0200001747.mm.2	Disp2	0.675	0.064081	0.00103226	TRUE	UP
TC0400003417.mm.2	Zfp691	1.545	0.064081	0.00103355	TRUE	UP
TC1500000388.mm.2	Mal2	1.0675	0.064081	0.00104176	TRUE	UP
TC1500002246.mm.2	Smagp	1.5125	0.064119	0.00104526	TRUE	UP
TC1200001237.mm.2	Tnfaip2	2.095	0.0653158	0.00107279	TRUE	UP
TC0X00001955.mm.2	Klhl13	1.13	0.0653158	0.0010736	TRUE	UP
TC1700000685.mm.2	H2-Q5	1.16	0.0654396	0.00108306	TRUE	UP
TC0900000296.mm.2	Ets1	1.39	0.0656929	0.00109927	TRUE	UP
TC1700001265.mm.2	Abcg8	2.305	0.0663778	0.00111795	TRUE	UP
TC0400003219.mm.2	Dio1	4.28	0.0664553	0.00112225	TRUE	UP
TC0200003280.mm.2	Tor1a	0.675	0.0672416	0.00114159	TRUE	UP
TC1300000724.mm.2	Naa35	1.13	0.0677361	0.00115812	TRUE	UP
TC1800001175.mm.2	Slc23a1	2.7	0.0677361	0.00115913	TRUE	UP
TC0900001635.mm.2	Snrk	0.8075	0.069471	0.00119821	TRUE	UP
TC0100003035.mm.2	Cd55b	1.155	0.0702252	0.00122041	TRUE	UP
TC1700001949.mm.2	Apom	0.925	0.0702252	0.00122703	TRUE	UP
TC0500002325.mm.2	Tapt1	1.3375	0.0707027	0.00124354	TRUE	UP
TC1400002215.mm.2	Fdft1	1.84	0.0707027	0.00124906	TRUE	UP
TC1200002518.mm.2	Asap2	2.4225	0.0707027	0.00125364	TRUE	UP
TC1400001671.mm.2	Stab1	0.82	0.0707027	0.00126252	TRUE	UP
TC0800001420.mm.2	Osgin1	2.04	0.0707027	0.00126624	TRUE	UP
TC0500003709.mm.2	Bre	0.645	0.0707027	0.00126857	TRUE	UP
TC1700002789.mm.2	H2-Q7; H2-Q9	1.13	0.0707027	0.00127916	TRUE	UP
TC0600000324.mm.2	Akr1b8	1.0775	0.0707027	0.00128658	TRUE	UP
TC0400002216.mm.2	Pdp1	3.4375	0.0707027	0.001288	TRUE	UP
TC0200003630.mm.2	Ifih1	2.4425	0.0707027	0.00129173	TRUE	UP
TC1900000127.mm.2	Ppp1r14b	1.305	0.0707027	0.00129823	TRUE	UP
TC0100002544.mm.2	Fn1	0.7025	0.0707027	0.00129996	TRUE	UP
TC1400002106.mm.2	Sdr39u1	0.9075	0.0707027	0.00130579	TRUE	UP
TC0700002088.mm.2	Cd81	0.61	0.0711635	0.00133167	TRUE	UP
TC1600000560.mm.2	B4galt4	1.045	0.0712364	0.00133773	TRUE	UP
TC1000000847.mm.2	Ndufs7	1.2175	0.0714988	0.00134909	TRUE	UP
TC1700001811.mm.2	Tff3	3.7025	0.0717181	0.00136491	TRUE	UP
TC0200003298.mm.2	Uck1	2.2375	0.0717181	0.00137719	TRUE	UP
TC1300001140.mm.2	Ccdc125	1.4275	0.0717181	0.00138435	TRUE	UP
TC0700004261.mm.2	Gtf3c1	0.7925	0.0717181	0.00138525	TRUE	UP
TC1800001207.mm.2	Taf7	0.9575	0.0717181	0.00138839	TRUE	UP
TC1000002693.mm.2	Elk3	0.9475	0.0717181	0.00139243	TRUE	UP
TC0900001195.mm.2	Paqr9	1.7325	0.0717181	0.00139539	TRUE	UP
TC0900001046.mm.2	Ick	0.9525	0.0717181	0.00139913	TRUE	UP
TC0900002676.mm.2	Mapk6	1.1425	0.0717181	0.00140491	TRUE	UP
TC1700002820.mm.2	C920025E04Rik	0.9825	0.0723747	0.00143052	TRUE	UP
TC0X00000122.mm.2	Sytl5	3.375	0.0723747	0.00143127	TRUE	UP
TC1300002083.mm.2	Lect2	1.815	0.0723747	0.00143363	TRUE	UP
TC1000000744.mm.2	Lss	2.3725	0.0723747	0.00143567	TRUE	UP
TC0800001127.mm.2	Adgrg3	1.725	0.0730984	0.00146087	TRUE	UP
TC0700000936.mm.2	Herc2	0.7475	0.0739569	0.00148854	TRUE	UP
TC1100002921.mm.2	Ulk2	1.2925	0.0739569	0.00148943	TRUE	UP
TC1900000882.mm.2	Lrp5	0.9375	0.0740668	0.00149761	TRUE	UP
TC0500002458.mm.2	Arap2	0.705	0.0740793	0.0015012	TRUE	UP
TC1800001655.mm.2	Hsbp1l1	1.3025	0.0742441	0.00151944	TRUE	UP
TC0700004291.mm.2	Sult1a1	1.2825	0.0742441	0.00152152	TRUE	UP
TC0500001909.mm.2	Cldn12	0.915	0.0742441	0.00152264	TRUE	UP
TC0400003653.mm.2	Epb41	0.7975	0.0742441	0.00152287	TRUE	UP
TC1500000725.mm.2	Aco2	1.1775	0.0742441	0.00152391	TRUE	UP
TC0800002553.mm.2	Tecr	0.6475	0.0743979	0.0015323	TRUE	UP
TC1300000763.mm.2	Mir23b; Mir27b; Mir24-1; 2010111I01Rik	1.295	0.0743979	0.00154215	TRUE	UP
TC0900001005.mm.2	Fam214a	1.1875	0.0743979	0.00154331	TRUE	UP
TC0100000682.mm.2	Utp14b; Acsl3	2.1125	0.0745148	0.00155365	TRUE	UP
TC1900000031.mm.2	Ptprcap	0.945	0.0745837	0.00155916	TRUE	UP
TC0500003061.mm.2	Mmab	0.9625	0.0745837	0.0015618	TRUE	UP
TC1000001595.mm.2	Apof	1.0125	0.0746707	0.00158436	TRUE	UP
TC1800000060.mm.2	Fzd8	2.4275	0.0746707	0.00159053	TRUE	UP
TC0200003698.mm.2	Abcb11	1.25	0.0746815	0.00159573	TRUE	UP
TC0500002320.mm.2	Prom1	4.72	0.0747816	0.00160832	TRUE	UP
TC0300003106.mm.2	Prkacb	1.145	0.0747816	0.00160973	TRUE	UP
TC1100000544.mm.2	Hnrnph1	0.8325	0.0749743	0.00161725	TRUE	UP
TC1900000455.mm.2	Mbl2	1.3875	0.0751857	0.0016283	TRUE	UP
TC1500002012.mm.2	Cerk	1.0275	0.0751857	0.00162858	TRUE	UP
TC0400001469.mm.2	Psmb2	0.735	0.0752038	0.00163441	TRUE	UP
TC1700001892.mm.2	H2-K1	0.6375	0.0752038	0.00163575	TRUE	UP
TC1200002272.mm.2	Serpina6	1.5925	0.0756695	0.00164929	TRUE	UP
TC0300001644.mm.2	Slc10a5	0.995	0.0760311	0.00166059	TRUE	UP
TC1000003161.mm.2	Dgka	0.83	0.0760909	0.0016748	TRUE	UP
TC1000001704.mm.2	Tab2	0.745	0.0760909	0.00167748	TRUE	UP
TC1200000089.mm.2	Smc6	0.8725	0.0760909	0.00167768	TRUE	UP
TC0400000377.mm.2	Dnaic1	3.7325	0.0760909	0.00168246	TRUE	UP
TC0300003016.mm.2	Mttp	0.8	0.0765199	0.00169913	TRUE	UP
TC1000001568.mm.2	Stat6	0.66	0.0765199	0.00169987	TRUE	UP
TC1300002034.mm.2	4833439L19Rik	0.77	0.0774479	0.00175461	TRUE	UP
TC1500000432.mm.2	Sqle	1.9925	0.0774479	0.00175686	TRUE	UP
TC1900000162.mm.2	Ubxn1	0.7075	0.0774479	0.00176398	TRUE	UP
TC0200003865.mm.2	Calcrl	0.7525	0.0775846	0.00177924	TRUE	UP
TC1200001685.mm.2	Dnajb9	1.005	0.0777833	0.00179279	TRUE	UP
TC0600001371.mm.2	Slc6a12	2.23	0.0777833	0.00179344	TRUE	UP
TC1900001342.mm.2	Plgrkt	0.7025	0.0787081	0.00182185	TRUE	UP
TC0700004652.mm.2	Snrpn; Snurf	1.015	0.0789667	0.00183917	TRUE	UP
TC1600000861.mm.2	Usp25	0.825	0.0796614	0.00187261	TRUE	UP
TC0200002170.mm.2	Naa20	1.2475	0.0804283	0.00189894	TRUE	UP
TC0800001202.mm.2	Ces4a	5.9225	0.0812591	0.00192683	TRUE	UP
TC0200002366.mm.2	Trp53inp2	1.6575	0.0812591	0.00193213	TRUE	UP
TC1300000919.mm.2	Glrx	1.23	0.0814417	0.00194014	TRUE	UP
TC1600001042.mm.2	Cbr1	2.465	0.0814507	0.00194769	TRUE	UP
TC1400000281.mm.2	Erc2	0.8225	0.0815836	0.00195821	TRUE	UP
TC0500003388.mm.2	Wbscr22	0.9	0.081815	0.00197473	TRUE	UP
TC1200000279.mm.2	Nampt	1.0975	0.081815	0.00197482	TRUE	UP
TC1900000566.mm.2	Cyp2c39	2.8225	0.0822763	0.00198966	TRUE	UP
TC0900002320.mm.2	Dmxl2	0.91	0.0827731	0.00201285	TRUE	UP
TC0200004651.mm.2	Rnf24	2.51	0.0835832	0.00205138	TRUE	UP
TC0200001535.mm.2	Abtb2	0.73	0.0836839	0.00205762	TRUE	UP
TC1200000588.mm.2	Tmx1	0.61	0.0843432	0.00210071	TRUE	UP
TC1000000030.mm.2	Esr1	2.485	0.0843432	0.00211755	TRUE	UP
TC0500000532.mm.2	Pi4k2b	2.16	0.0843432	0.00211776	TRUE	UP
TC1900000990.mm.2	Dpf2	0.73	0.0843432	0.00212252	TRUE	UP
TC0600000841.mm.2	St3gal5	1.705	0.0843432	0.0021308	TRUE	UP
TC0100000097.mm.2	Rdh10	0.9825	0.0843491	0.00213475	TRUE	UP
TC0100001397.mm.2	Stx6	1.3025	0.0843899	0.00213958	TRUE	UP
TC0700004224.mm.2	Ndufab1	0.695	0.085091	0.00216974	TRUE	UP
TC0200004775.mm.2	Crnkl1	0.74	0.0851177	0.00218103	TRUE	UP
TC1600001757.mm.2	Nit2	1.05	0.08521	0.00218948	TRUE	UP
TC0200002295.mm.2	H13	0.965	0.08521	0.00219491	TRUE	UP
TC1100002967.mm.2	Cox10	0.8775	0.0866268	0.00225091	TRUE	UP
TC1000000656.mm.2	Rhobtb1	1.375	0.0871831	0.00226929	TRUE	UP
TC1200001030.mm.2	Ifi27	1.8775	0.0882929	0.00230701	TRUE	UP
TC1500000784.mm.2	Samm50	1.2875	0.0882929	0.00230748	TRUE	UP
TC0500002420.mm.2	Sel1l3	0.945	0.0882929	0.00231408	TRUE	UP
TC1800000191.mm.2	Galnt1	0.8175	0.0887517	0.0023301	TRUE	UP
TC1600001944.mm.2	D16Ertd472e	1.275	0.0891926	0.00235284	TRUE	UP
TC0300001956.mm.2	Ndufc1	0.6825	0.0904217	0.00241466	TRUE	UP
TC0700004296.mm.2	Aldoa	1.155	0.0904359	0.00242111	TRUE	UP
TC1700000470.mm.2	Anks1	2.7125	0.0904359	0.0024365	TRUE	UP
TC0700003765.mm.2	Aamdc	0.8875	0.0904359	0.00244068	TRUE	UP
TC1200001031.mm.2	Ppp4r4	1.2	0.0904359	0.00245172	TRUE	UP
TC1200002421.mm.2	2010107E04Rik	0.8275	0.0904359	0.00245248	TRUE	UP
TC1500001174.mm.2	Wdr70	0.7	0.0904359	0.00246226	TRUE	UP
TC0600000277.mm.2	Mest	0.79	0.0904359	0.00246588	TRUE	UP
TC0300002334.mm.2	Fdps	1.63	0.0904359	0.00247782	TRUE	UP
TC0100000847.mm.2	Spp2	2.25	0.0904359	0.00248306	TRUE	UP
TC1700002422.mm.2	Ndufv2	0.8825	0.0904359	0.00248308	TRUE	UP
TC0600001035.mm.2	Mgll	1.98	0.0904359	0.00248428	TRUE	UP
TC0600000998.mm.2	Aak1	0.6075	0.0911656	0.00250843	TRUE	UP
TC1300000266.mm.2	Slc17a3	1.185	0.0912326	0.00251923	TRUE	UP
TC1000001576.mm.2	BC089597	1.415	0.0912326	0.00252334	TRUE	UP
TC1900001476.mm.2	Cyp2c38	2.295	0.0912326	0.00252671	TRUE	UP
TC0800002734.mm.2	Ciapin1	1.26	0.0928534	0.00260505	TRUE	UP
TC0400001276.mm.2	Ptch2	0.9675	0.0936681	0.00263634	TRUE	UP
TC0700000647.mm.2	Pepd	0.865	0.0943769	0.00266054	TRUE	UP
TC0100003449.mm.2	Mpzl1	1.37	0.0950543	0.002692	TRUE	UP
TC0X00000327.mm.2	Slc25a5	0.835	0.0950543	0.00269607	TRUE	UP
TC1300000815.mm.2	Ptdss1	0.6325	0.0957268	0.00274989	TRUE	UP
TC0600002324.mm.2	Ggct	2.0725	0.0967159	0.00281298	TRUE	UP
TC0600003268.mm.2	Ybx3	1.355	0.0967159	0.00282419	TRUE	UP
TC0400002290.mm.2	Tstd3	0.9875	0.0967159	0.0028247	TRUE	UP
TC0800001124.mm.2	Polr2c	0.79	0.0967159	0.00284697	TRUE	UP
TC1300002471.mm.2	Polk	0.68	0.0967159	0.00284809	TRUE	UP
TC1200001797.mm.2	Slc25a21	1.285	0.0967159	0.00284843	TRUE	UP
TC1000000171.mm.2	Sgk1	1.5675	0.09754	0.00288149	TRUE	UP
TC0400001223.mm.2	Cyp4a12b	-10.34	0.00237355	2.24464e-06	TRUE	DOWN
TC1900001550.mm.2	Cyp2c44	-7.205	0.0042924	6.95877e-06	TRUE	DOWN
TC1100003561.mm.2	Abcc3	-4.775	0.00453636	7.55856e-06	TRUE	DOWN
TC0500003742.mm.2	Tmem184a	-2.1425	0.00523269	8.97478e-06	TRUE	DOWN
TC0300002558.mm.2	Hsd3b2	-4.8375	0.00543984	1.12914e-05	TRUE	DOWN
TC0200004241.mm.2	Hipk3; Mir1902	-1.2725	0.00543984	1.15137e-05	TRUE	DOWN
TC0600003345.mm.2	Slc15a5	-2.835	0.00715851	1.77303e-05	TRUE	DOWN
TC0X00001501.mm.2	Alas2	-2.895	0.00724004	1.83673e-05	TRUE	DOWN
TC0600001768.mm.2	Mettl20	-2.9	0.0075236	1.96509e-05	TRUE	DOWN
TC0200003109.mm.2	Hnmt	-1.9375	0.00837434	2.30044e-05	TRUE	DOWN
TC1500000072.mm.2	Ugt3a1	-3.7275	0.00843939	2.38974e-05	TRUE	DOWN
TC1500000014.mm.2	C6	-5.7025	0.00843939	2.39431e-05	TRUE	DOWN
TC0300002565.mm.2	Hsd3b1	-0.7675	0.0084775	2.4433e-05	TRUE	DOWN
TC0300001494.mm.2	Uox	-3.455	0.00858143	2.55055e-05	TRUE	DOWN
TC0400001221.mm.2	Cyp4a12a	-11.52	0.00878688	2.70107e-05	TRUE	DOWN
TC0500000488.mm.2	Lap3	-1.5425	0.00896611	2.96955e-05	TRUE	DOWN
TC1900000896.mm.2	Gstp1	-2.94	0.00903936	3.05518e-05	TRUE	DOWN
TC0300001482.mm.2	Ddah1	-5.51	0.00953248	3.34834e-05	TRUE	DOWN
TC1000000713.mm.2	Upb1	-2.0775	0.0097337	3.46286e-05	TRUE	DOWN
TC1100000940.mm.2	Asgr2	-1.9725	0.00988612	3.5616e-05	TRUE	DOWN
TC0400003234.mm.2	Scp2	-3.5025	0.0103657	3.82773e-05	TRUE	DOWN
TC1200000839.mm.2	Mfsd7c	-2.5975	0.012587	4.9881e-05	TRUE	DOWN
TC1900001445.mm.2	Ppp1r3c	-5.855	0.0132172	5.36765e-05	TRUE	DOWN
TC1900000897.mm.2	Gstp2	-2.9025	0.0133578	5.59431e-05	TRUE	DOWN
TC0500002881.mm.2	Hsd17b13	-1.135	0.0141137	6.10155e-05	TRUE	DOWN
TC1500000757.mm.2	Cyp2d9	-6.3625	0.0148685	6.64688e-05	TRUE	DOWN
TC0300001413.mm.2	Adh6-ps1	-3.845	0.0149671	6.8075e-05	TRUE	DOWN
TC1300000442.mm.2	Dsp	-1.8475	0.0161417	7.70519e-05	TRUE	DOWN
TC1600000958.mm.2	Bach1	-1.405	0.0175212	8.67933e-05	TRUE	DOWN
TC0800000394.mm.2	Gsr	-1.0725	0.0177577	8.95644e-05	TRUE	DOWN
TC1900000254.mm.2	Keg1	-5.31	0.0188985	9.8722e-05	TRUE	DOWN
TC0600001696.mm.2	Etnk1	-1.26	0.0191317	0.000101664	TRUE	DOWN
TC1400001655.mm.2	Il17rb	-2.8875	0.0205752	0.000114894	TRUE	DOWN
TC0800001608.mm.2	Insr	-0.815	0.0207118	0.000116589	TRUE	DOWN
TC1600000376.mm.2	Il1rap	-2.96	0.0230023	0.000138134	TRUE	DOWN
TC1100002134.mm.2	Znrf3	-0.8375	0.0230023	0.000138872	TRUE	DOWN
TC0800002706.mm.2	Ces1g	-1.69	0.0230037	0.000140885	TRUE	DOWN
TC1500001953.mm.2	Cyp2d13	-2.615	0.0237689	0.000148443	TRUE	DOWN
TC0600000902.mm.2	Eva1a	-1.8575	0.0245061	0.000158615	TRUE	DOWN
TC1100004250.mm.2	Wdr45b	-0.6925	0.0252156	0.000165787	TRUE	DOWN
TC0400002606.mm.2	Gabbr2	-3.685	0.0252347	0.00016705	TRUE	DOWN
TC0500001641.mm.2	Zkscan1	-0.815	0.0254806	0.000170822	TRUE	DOWN
TC1700001465.mm.2	Unc93a; Gm9992	-1.04	0.0254806	0.000170972	TRUE	DOWN
TC0200003529.mm.2	Neb	-1.815	0.0257696	0.000177553	TRUE	DOWN
TC0600001279.mm.2	Pparg	-2.29	0.0282202	0.000203334	TRUE	DOWN
TC1700001299.mm.2	Epas1	-1.2325	0.0290046	0.000212904	TRUE	DOWN
TC0300002957.mm.2	Cyp2u1	-4.9975	0.0300932	0.00022225	TRUE	DOWN
TC1500002056.mm.2	Arsa	-3.1325	0.0313575	0.000247353	TRUE	DOWN
TC1400001914.mm.2	Bmp4	-1.3225	0.0313575	0.000248534	TRUE	DOWN
TC0X00002482.mm.2	Pls3	-0.76	0.0315606	0.000257871	TRUE	DOWN
TC0500003600.mm.2	Cyp3a11	-1.705	0.0315606	0.000262957	TRUE	DOWN
TC0700000917.mm.2	Gas2	-2.745	0.0315606	0.000263016	TRUE	DOWN
TC1000002900.mm.2	Tmem19	-1.185	0.0315606	0.000267522	TRUE	DOWN
TC0500003576.mm.2	Baiap2l1	-1.55	0.0315606	0.000268178	TRUE	DOWN
TC1400000301.mm.2	Chdh	-2.9225	0.0315606	0.00027004	TRUE	DOWN
TC0900001578.mm.2	Xylb	-1.425	0.0318308	0.000276652	TRUE	DOWN
TC0800002950.mm.2	Ldhd	-1.57	0.0327174	0.000293198	TRUE	DOWN
TC0300001176.mm.2	Olfm3	-0.9775	0.0331693	0.000309338	TRUE	DOWN
TC1000002320.mm.2	Arid5b	-2.86	0.0353316	0.000332536	TRUE	DOWN
TC0700001624.mm.2	Wee1	-0.905	0.0360505	0.00034255	TRUE	DOWN
TC1500001955.mm.2	Cyp2d40	-0.7925	0.0360908	0.000344558	TRUE	DOWN
TC1600001352.mm.2	Clcn2	-1.0425	0.0365764	0.000355692	TRUE	DOWN
TC0400003862.mm.2	Arhgef10l	-0.6	0.0365764	0.000357218	TRUE	DOWN
TC0100003104.mm.2	Adora1	-3.7975	0.0376612	0.00037105	TRUE	DOWN
TC0500000837.mm.2	5830473C10Rik	-2.325	0.0392585	0.000397603	TRUE	DOWN
TC0800001955.mm.2	Adrb3	-1.84	0.0408696	0.000438033	TRUE	DOWN
TC1200000183.mm.2	Iah1	-0.745	0.0415724	0.000451182	TRUE	DOWN
TC1500001531.mm.2	Enpp2	-2.7325	0.0433346	0.000474211	TRUE	DOWN
TC1000003127.mm.2	Hsd17b6	-4.33	0.0438648	0.000483963	TRUE	DOWN
TC1500002181.mm.2	Adcy6	-1.6725	0.0441462	0.000489055	TRUE	DOWN
TC1000001656.mm.2	Olfr813	-0.83	0.0444738	0.000499178	TRUE	DOWN
TC1300002126.mm.2	Zcchc6	-0.75	0.0447595	0.000505928	TRUE	DOWN
TC0100002054.mm.2	Rims1	-0.63	0.0448806	0.000509317	TRUE	DOWN
TC0600003108.mm.2	C1s1	-1.3225	0.0453839	0.000517589	TRUE	DOWN
TC0900001921.mm.2	Dpy19l1	-1.1725	0.045468	0.000522126	TRUE	DOWN
TC1500001831.mm.2	Tst	-0.675	0.0455277	0.000528963	TRUE	DOWN
TC0700001252.mm.2	Nox4	-5.4175	0.0464018	0.000541208	TRUE	DOWN
TC0300001414.mm.2	Adh4	-4.06	0.047677	0.000563812	TRUE	DOWN
TC1700000565.mm.2	Cyp4f37	-0.5925	0.0477298	0.000571743	TRUE	DOWN
TC0700001015.mm.2	Fam169b	-0.9925	0.0478499	0.000576479	TRUE	DOWN
TC0800002505.mm.2	Ednra	-0.9275	0.0478499	0.000581802	TRUE	DOWN
TC0800000694.mm.2	Nat2	-0.9525	0.0487914	0.00059984	TRUE	DOWN
TC0200002869.mm.2	Mcm10	-3.785	0.04976	0.000620712	TRUE	DOWN
TC1500001945.mm.2	Cyp2d11; Mir7684	-3.025	0.0501042	0.000638611	TRUE	DOWN
TC0700002628.mm.2	Erf	-0.8325	0.0501042	0.000643056	TRUE	DOWN
TC1000000404.mm.2	F830002L21Rik	-1.005	0.0508669	0.000659717	TRUE	DOWN
TC0800001883.mm.2	Gpat4	-0.78	0.0512173	0.000666567	TRUE	DOWN
TC0400000438.mm.2	Car9	-0.7	0.0512473	0.000670844	TRUE	DOWN
TC0700003738.mm.2	Ankrd42	-0.91	0.0512473	0.000671573	TRUE	DOWN
TC1300002196.mm.2	Slc35d2	-0.99	0.0524638	0.00069224	TRUE	DOWN
TC0500001590.mm.2	Hspb1	-1.775	0.0525563	0.000695828	TRUE	DOWN
TC0100001533.mm.2	Ildr2	-2.3725	0.053434	0.000710979	TRUE	DOWN
TC1900000898.mm.2	BC021614	-1.61	0.0540483	0.000725318	TRUE	DOWN
TC0500000876.mm.2	Fam47e	-1.73	0.0549338	0.000747096	TRUE	DOWN
TC0700004409.mm.2	Oat	-3.62	0.0553928	0.000755833	TRUE	DOWN
TC1500000760.mm.2	Cyp2d12	-2.5625	0.0562598	0.00077273	TRUE	DOWN
TC0X00003057.mm.2	Serpina7	-6.615	0.0565423	0.00078462	TRUE	DOWN
TC1800001461.mm.2	Fech	-0.975	0.0565423	0.000790291	TRUE	DOWN
TC1100002451.mm.2	Chac2	-1.565	0.0565423	0.000790719	TRUE	DOWN
TC0900001902.mm.2	1810064F22Rik	-2.665	0.0581895	0.000839234	TRUE	DOWN
TC1700001805.mm.2	Glo1	-2.4325	0.0581895	0.000845735	TRUE	DOWN
TC0300001244.mm.2	Gclm	-0.965	0.0581895	0.000851534	TRUE	DOWN
TC0900001099.mm.2	Sh3bgrl2	-1.215	0.0584406	0.000873512	TRUE	DOWN
TC0100002479.mm.2	Crygb	-0.765	0.0584406	0.000875863	TRUE	DOWN
TC0700004346.mm.2	Prss8	-2.135	0.0596385	0.000905079	TRUE	DOWN
TC0400002637.mm.2	Mrpl50	-0.66	0.0599321	0.000919366	TRUE	DOWN
TC1100003792.mm.2	Psmc3ip	-0.8075	0.0599321	0.00092254	TRUE	DOWN
TC0500001238.mm.2	4930519G04Rik	-0.8	0.0599321	0.000923342	TRUE	DOWN
TC0200002136.mm.2	Dstn	-0.935	0.0599321	0.000928564	TRUE	DOWN
TC0200001643.mm.2	Olfr1281	-1.0675	0.0599321	0.000928618	TRUE	DOWN
TC0600000711.mm.2	Abcg2	-2.1075	0.0599321	0.000931126	TRUE	DOWN
TC0200004003.mm.2	Olfr1160	-1.01	0.0605621	0.000946368	TRUE	DOWN
TC1800001421.mm.2	Arhgef37	-1.015	0.0619502	0.000973638	TRUE	DOWN
TC1100001859.mm.2	Sstr2	-1.4925	0.0625731	0.00099093	TRUE	DOWN
TC1500002282.mm.2	Krt8	-1.9275	0.0625731	0.000991882	TRUE	DOWN
TC0600001639.mm.2	Mgst1	-0.6325	0.0628604	0.000999267	TRUE	DOWN
TC1500001657.mm.2	Ndrg1	-2.2575	0.064081	0.00103437	TRUE	DOWN
TC1600000618.mm.2	Zbtb20; Mir568	-0.735	0.064081	0.00103631	TRUE	DOWN
TC0400001010.mm.2	Pgm2	-0.775	0.064081	0.00104107	TRUE	DOWN
TC1300001033.mm.2	Dhfr	-1.055	0.0654396	0.00108167	TRUE	DOWN
TC1300000687.mm.2	Slc25a48	-1.18	0.0654396	0.00108447	TRUE	DOWN
TC0100002600.mm.2	Cnppd1	-1.3975	0.0656929	0.00109764	TRUE	DOWN
TC0100003825.mm.2	Gm3934	-3.415	0.0656929	0.00109954	TRUE	DOWN
TC0100003190.mm.2	Gm4788	-1.0325	0.0656929	0.0011005	TRUE	DOWN
TC0300003103.mm.2	Dnase2b	-1.55	0.0657167	0.00110386	TRUE	DOWN
TC0300003245.mm.2	Gstm6	-1.64	0.0677361	0.00115518	TRUE	DOWN
TC0100000633.mm.2	Ctdsp1	-0.715	0.068458	0.00117457	TRUE	DOWN
TC0900000540.mm.2	Fxyd6	-0.84	0.0702252	0.00122593	TRUE	DOWN
TC0600001366.mm.2	Pex26	-1.395	0.0702252	0.00122625	TRUE	DOWN
TC0900002751.mm.2	Htr1b	-0.8375	0.0707027	0.00125224	TRUE	DOWN
TC1000002572.mm.2	Nfyb	-0.995	0.0707027	0.00125476	TRUE	DOWN
TC0400001970.mm.2	Slc2a5	-2.955	0.0707027	0.00127215	TRUE	DOWN
TC0600001375.mm.2	Gm10319	-1.6	0.0707027	0.00128356	TRUE	DOWN
TC0900002379.mm.2	Cyp1a2	-1.7575	0.0707027	0.00129817	TRUE	DOWN
TC1400002266.mm.2	Ephx2	-1.6875	0.0707027	0.00129947	TRUE	DOWN
TC0500003740.mm.2	Gal3st4	-0.9725	0.0707027	0.00130906	TRUE	DOWN
TC0400001141.mm.2	Echdc2	-1.355	0.0710567	0.00132308	TRUE	DOWN
TC1500001084.mm.2	Krt18	-1.53	0.0711635	0.00133315	TRUE	DOWN
TC1200000236.mm.2	Adi1	-1.34	0.0714876	0.00134566	TRUE	DOWN
TC1700000832.mm.2	Adgrf1	-4.9675	0.0717181	0.00137698	TRUE	DOWN
TC0700000652.mm.2	Cebpa	-1.94	0.0717181	0.0013922	TRUE	DOWN
TC1300002445.mm.2	Scamp1	-1.705	0.0717181	0.00139456	TRUE	DOWN
TC0300003017.mm.2	4930579F01Rik	-0.75	0.0717181	0.00140307	TRUE	DOWN
TC0400002791.mm.2	Alad	-0.7	0.0723747	0.00142771	TRUE	DOWN
TC1100000029.mm.2	Gal3st1	-0.8475	0.0723747	0.00143733	TRUE	DOWN
TC1700001856.mm.2	Cyp4f14	-0.89	0.0730984	0.00145651	TRUE	DOWN
TC0300002702.mm.2	Prok1	-2.06	0.0730984	0.00146157	TRUE	DOWN
TC0900003040.mm.2	Slc38a3	-0.78	0.0735538	0.00147399	TRUE	DOWN
TC1800000105.mm.2	Ttc39c	-2.465	0.0739569	0.00149206	TRUE	DOWN
TC0300002559.mm.2	Hsd3b3	-3.945	0.0743979	0.00153872	TRUE	DOWN
TC0500002882.mm.2	Hsd17b11	-1.74	0.0743979	0.00154626	TRUE	DOWN
TC1900000763.mm.2	Pdcd4	-0.735	0.0743979	0.00154786	TRUE	DOWN
TC0700002720.mm.2	Spint2	-1.2	0.0746121	0.00156576	TRUE	DOWN
TC0600001424.mm.2	C1rb	-1.17	0.074632	0.00157843	TRUE	DOWN
TC0400001990.mm.2	Errfi1	-1.4875	0.0746707	0.00158815	TRUE	DOWN
TC0300002357.mm.2	Il6ra	-1.1075	0.0746815	0.00159748	TRUE	DOWN
TC1700001621.mm.2	1600002H07Rik	-2.3625	0.0747816	0.00160499	TRUE	DOWN
TC1100001587.mm.2	Rara	-0.8625	0.0760909	0.00167268	TRUE	DOWN
TC1700000567.mm.2	Cyp4f15	-1.2025	0.0760909	0.00168021	TRUE	DOWN
TC0500002557.mm.2	Gabrg1	-0.6775	0.0765199	0.00170228	TRUE	DOWN
TC0300000675.mm.2	Sh3d19	-1.2225	0.0768918	0.00171748	TRUE	DOWN
TC0600003600.mm.2	Cml5	-1.5475	0.0774479	0.00173841	TRUE	DOWN
TC0200000490.mm.2	Tsc1	-1.0475	0.0774479	0.00175111	TRUE	DOWN
TC1900001477.mm.2	Cyp2c67	-3.35	0.0774479	0.00175956	TRUE	DOWN
TC1100003698.mm.2	Krt222	-0.9925	0.077551	0.00177062	TRUE	DOWN
TC1500001136.mm.2	Ghr	-0.86	0.0775846	0.00178187	TRUE	DOWN
TC0500000877.mm.2	Stbd1	-1.95	0.0789667	0.00183849	TRUE	DOWN
TC1000002943.mm.2	Slc35e3	-1.1825	0.0789667	0.00184805	TRUE	DOWN
TC1100003276.mm.2	Pipox	-0.9025	0.0789667	0.0018489	TRUE	DOWN
TC0200003656.mm.2	Cobll1	-0.61	0.079254	0.00185947	TRUE	DOWN
TC0900001416.mm.2	Dalrd3	-0.6225	0.0804283	0.00190151	TRUE	DOWN
TC0700004312.mm.2	Qprt	-0.6575	0.0814507	0.00194417	TRUE	DOWN
TC1900001729.mm.2	Shtn1	-0.785	0.0823426	0.00199497	TRUE	DOWN
TC1900000040.mm.2	Pcx	-1.0975	0.0826225	0.00200547	TRUE	DOWN
TC1000000131.mm.2	Nhsl1	-0.64	0.083343	0.00204087	TRUE	DOWN
TC1100003720.mm.2	Gm11938	-0.865	0.083343	0.00204173	TRUE	DOWN
TC0700000693.mm.2	1600014C10Rik	-1.145	0.0843432	0.00209709	TRUE	DOWN
TC0400003101.mm.2	Cyp2j5	-2.7175	0.0843432	0.00209923	TRUE	DOWN
TC0600003148.mm.2	Cd9	-1.2025	0.0843432	0.00212859	TRUE	DOWN
TC0700002857.mm.2	Dpy19l3	-1.8775	0.0843432	0.0021295	TRUE	DOWN
TC1400000935.mm.2	Zfp395	-1.0525	0.085091	0.00216185	TRUE	DOWN
TC1500001339.mm.2	Tspyl5	-0.66	0.0851177	0.00218079	TRUE	DOWN
TC0700000752.mm.2	Gm10351	-0.715	0.0854939	0.00220992	TRUE	DOWN
TC0300000484.mm.2	Sucnr1	-3.67	0.0860115	0.00222717	TRUE	DOWN
TC1700000327.mm.2	Dcpp2; Dcpp1	-0.8675	0.0862732	0.00223783	TRUE	DOWN
TC0600000849.mm.2	Tmem150a	-1.12	0.0891926	0.00234674	TRUE	DOWN
TC1000001284.mm.2	Csrp2	-1.0325	0.089528	0.00236661	TRUE	DOWN
TC1000001493.mm.2	Gns	-0.6125	0.0903082	0.0024017	TRUE	DOWN
TC0500000791.mm.2	Ugt2b35	-1.1975	0.0903082	0.0024035	TRUE	DOWN
TC0400003361.mm.2	Plk3	-1.9075	0.0904098	0.00241028	TRUE	DOWN
TC1200001583.mm.2	Sntg2	-2.14	0.0904359	0.00245188	TRUE	DOWN
TC1500000165.mm.2	Fam134b	-1.3375	0.0904359	0.00245223	TRUE	DOWN
TC0200002335.mm.2	Bpifa1	-0.595	0.0904359	0.00248273	TRUE	DOWN
TC1000001577.mm.2	Sdr9c7	-3.0175	0.0912326	0.0025176	TRUE	DOWN
TC0600000270.mm.2	Cpa4	-0.665	0.0916379	0.00254624	TRUE	DOWN
TC0600001422.mm.2	C1ra	-1.3675	0.0916379	0.00255061	TRUE	DOWN
TC1500001783.mm.2	Slc39a4	-2.175	0.0916379	0.00255619	TRUE	DOWN
TC1100003997.mm.2	Abca8b	-1.68	0.0916379	0.00255702	TRUE	DOWN
TC0500003371.mm.2	Gtf2ird1	-0.8825	0.0917785	0.00256662	TRUE	DOWN
TC0X00003216.mm.2	Samt1; Gm15140	-0.74	0.0926935	0.00259639	TRUE	DOWN
TC1500001946.mm.2	Cyp2d10	-1.055	0.0950543	0.00268533	TRUE	DOWN
TC0400001610.mm.2	Fam46b	-1.0075	0.0950543	0.00269676	TRUE	DOWN
TC0100002179.mm.2	Kansl3	-0.8525	0.0954734	0.00271532	TRUE	DOWN
TC0300002725.mm.2	Gstm1	-0.81	0.0955519	0.00272809	TRUE	DOWN
TC1500001088.mm.2	Tns2	-1.46	0.095582	0.00273325	TRUE	DOWN
TC0800000482.mm.2	Slc7a2	-1.4	0.0957268	0.00274446	TRUE	DOWN
TC1500001944.mm.2	Cyp2d22	-2.2725	0.0961764	0.00276757	TRUE	DOWN
TC0500003168.mm.2	Plbd2	-1.025	0.0967159	0.0027929	TRUE	DOWN
TC0700002023.mm.2	Cyp2e1	-1.8625	0.0967159	0.00280782	TRUE	DOWN
TC1400002310.mm.2	Slc25a37	-0.71	0.0967159	0.00282809	TRUE	DOWN
TC0200001524.mm.2	Slc1a2	-1.69	0.0967159	0.00282831	TRUE	DOWN
TC1900000538.mm.2	Cyp26a1	-1.3025	0.0967159	0.00282967	TRUE	DOWN
TC0Y00000122.mm.2	Gm20738; Gm20823	-1.05	0.0967159	0.00283467	TRUE	DOWN
TC0600001458.mm.2	Scnn1a	-1.8425	0.0967159	0.00283917	TRUE	DOWN
TC0400003460.mm.2	Gm12888	-0.7875	0.0985267	0.00291507	TRUE	DOWN

## Sheet: Sheet 3
ID	Gene.Symbol	Fold Change	p value (FDR)	p value	Significance	Status
TC0700001409.mm.2	Ucp2	3.5475	0.00020348	1.34408e-08	TRUE	UP
TC1700000836.mm.2	Cyp39a1	3.2675	0.000355284	1.10258e-07	TRUE	UP
TC0900001726.mm.2	Cep126	6.7875	0.000406324	1.46384e-07	TRUE	UP
TC0800001202.mm.2	Ces4a	6.4675	0.000862055	6.79322e-07	TRUE	UP
TC1300001377.mm.2	Akr1c18	11.655	0.000862055	7.3374e-07	TRUE	UP
TC0500003596.mm.2	Cyp3a16	11.77	0.000914676	8.2381e-07	TRUE	UP
TC0200005123.mm.2	Wfdc16	3.725	0.00127073	1.37339e-06	TRUE	UP
TC0200004219.mm.2	Cd44	2.355	0.00236224	3.08497e-06	TRUE	UP
TC1900000317.mm.2	Rfk	1.8225	0.0024555	3.33398e-06	TRUE	UP
TC0600003536.mm.2	Clec1b	1.3325	0.00358937	5.49574e-06	TRUE	UP
TC1100000965.mm.2	Kif1c; Mir6925	1.1925	0.00465606	7.758e-06	TRUE	UP
TC0900002780.mm.2	Me1	2.1875	0.00467292	8.04788e-06	TRUE	UP
TC0100003533.mm.2	Fcer1g	2.09	0.00467292	8.20696e-06	TRUE	UP
TC0100002576.mm.2	Tns1	1.17	0.00522661	1.10003e-05	TRUE	UP
TC0900001900.mm.2	Acp5	1.595	0.00526768	1.18609e-05	TRUE	UP
TC0200000868.mm.2	Gpd2	1.4625	0.0057531	1.39557e-05	TRUE	UP
TC1700002175.mm.2	Slc22a7	7.1375	0.0057531	1.39903e-05	TRUE	UP
TC1000002383.mm.2	Gstt1	2.835	0.00590365	1.46916e-05	TRUE	UP
TC0700001258.mm.2	Ctsc	2.115	0.00607619	1.55968e-05	TRUE	UP
TC1600000489.mm.2	Hacd2	1.2175	0.0062653	1.63644e-05	TRUE	UP
TC0400001557.mm.2	Laptm5	1.9125	0.00677544	1.8307e-05	TRUE	UP
TC0900000560.mm.2	Apoa4	3.025	0.00684228	1.90032e-05	TRUE	UP
TC1900001057.mm.2	Slc22a27	8.2125	0.00736588	2.22244e-05	TRUE	UP
TC0400001555.mm.2	Sdc3	2.295	0.00755794	2.34846e-05	TRUE	UP
TC1200002524.mm.2	Serpina3f	1.5675	0.00757301	2.42134e-05	TRUE	UP
TC0400003219.mm.2	Dio1	3.665	0.00821152	2.84737e-05	TRUE	UP
TC1400001906.mm.2	Ddhd1; Mir5131	1.9975	0.00845831	2.97991e-05	TRUE	UP
TC0300000903.mm.2	Ctss	1.725	0.00857367	3.166e-05	TRUE	UP
TC1500000688.mm.2	Apobec3	1.825	0.00866515	3.2388e-05	TRUE	UP
TC0700000446.mm.2	Cyp2a12	1.6775	0.00896726	3.47287e-05	TRUE	UP
TC1600000564.mm.2	Igsf11	1.2575	0.0089926	3.72193e-05	TRUE	UP
TC0200005317.mm.2	Slmo2	1.525	0.0089926	3.78444e-05	TRUE	UP
TC0600000609.mm.2	Snx10	1.3725	0.0089926	3.80228e-05	TRUE	UP
TC0X00001829.mm.2	Cybb	1.94	0.00899384	3.90227e-05	TRUE	UP
TC1100001149.mm.2	Rab34	2.6625	0.00899384	3.92868e-05	TRUE	UP
TC0100000836.mm.2	Ugt1a2; Ugt1a6a; Ugt1a6b; Ugt1a10; Ugt1a7c; Ugt1a5; Ugt1a9; Ugt1a1	0.9775	0.00901874	3.98017e-05	TRUE	UP
TC0700003845.mm.2	Folr2	2.93	0.00934431	4.21417e-05	TRUE	UP
TC1400001930.mm.2	Gch1	1.6875	0.00934431	4.25009e-05	TRUE	UP
TC0100002969.mm.2	Insig2	3.085	0.0102533	4.94879e-05	TRUE	UP
TC1900001612.mm.2	Cyp17a1	10.44	0.0107954	5.299e-05	TRUE	UP
TC1500001729.mm.2	Ly6c1	2.3925	0.010876	5.39817e-05	TRUE	UP
TC0300001137.mm.2	Sort1	1.8425	0.0109175	5.58016e-05	TRUE	UP
TC1300000425.mm.2	Ly86	2.2225	0.0109175	5.6289e-05	TRUE	UP
TC1600001553.mm.2	Dirc2	1.24	0.0109175	5.65392e-05	TRUE	UP
TC0100003891.mm.2	Ifi203	1.4875	0.0115526	6.05665e-05	TRUE	UP
TC1900000090.mm.2	Slc25a45	2.2375	0.0115526	6.0869e-05	TRUE	UP
TC1700001949.mm.2	Apom	1.0875	0.0117215	6.2304e-05	TRUE	UP
TC0800002665.mm.2	Sall1	2.6175	0.0123169	6.9333e-05	TRUE	UP
TC0700002655.mm.2	Cyp2a22	5.9575	0.0124347	7.13693e-05	TRUE	UP
TC1000002929.mm.2	Lyz2	2.4675	0.0124347	7.27879e-05	TRUE	UP
TC1000002814.mm.2	Acss3	2.65	0.0124695	7.35611e-05	TRUE	UP
TC0400001530.mm.2	Ptp4a2	0.8625	0.0129819	7.77534e-05	TRUE	UP
TC0400000720.mm.2	Orm3	3.535	0.0134203	8.09834e-05	TRUE	UP
TC1400002430.mm.2	Slc25a30	3.1325	0.014136	8.65754e-05	TRUE	UP
TC0X00003360.mm.2	Tlr7	2.2725	0.0143568	8.92353e-05	TRUE	UP
TC1200000098.mm.2	Fam49a	1.1925	0.0143568	9.05138e-05	TRUE	UP
TC1700000470.mm.2	Anks1	1.825	0.0149349	9.68487e-05	TRUE	UP
TC1200002506.mm.2	Dnah11	6.36	0.0150275	9.8126e-05	TRUE	UP
TC1200001663.mm.2	Ifrd1	2.43	0.0151339	9.96753e-05	TRUE	UP
TC0900002218.mm.2	Apoc3	0.5975	0.0160185	0.000107482	TRUE	UP
TC0100000766.mm.2	Sp100	1.5575	0.0167303	0.000114302	TRUE	UP
TC0300001446.mm.2	Gbp3	4.1575	0.0167303	0.000114519	TRUE	UP
TC1400002869.mm.2	Phf11d; Phf11c	1.075	0.0168295	0.000116714	TRUE	UP
TC1700000335.mm.2	Abca3	2.885	0.0169603	0.000118384	TRUE	UP
TC0500002420.mm.2	Sel1l3	0.8525	0.0171529	0.000120501	TRUE	UP
TC0800003091.mm.2	Sult5a1	4.0125	0.0173386	0.000122587	TRUE	UP
TC0700000168.mm.2	Sult2a5	3.3025	0.0173561	0.000124274	TRUE	UP
TC0500002694.mm.2	Ugt2b37	4.675	0.0181614	0.000133311	TRUE	UP
TC1100003399.mm.2	Ccl6	2.7425	0.0181956	0.000134382	TRUE	UP
TC0500003729.mm.2	Gbp8	1.3925	0.0182228	0.000137264	TRUE	UP
TC1100004270.mm.2	Tlcd2	3.08	0.0182228	0.000138875	TRUE	UP
TC0600002578.mm.2	Clec4f	2.4775	0.0182932	0.000143876	TRUE	UP
TC1000000759.mm.2	Itgb2	1.94	0.0182932	0.000145429	TRUE	UP
TC0400003793.mm.2	C1qc	2.4425	0.0182932	0.000145554	TRUE	UP
TC0200005013.mm.2	Samhd1	1.42	0.0182932	0.000147747	TRUE	UP
TC1900000467.mm.2	Papss2	2.9075	0.0182932	0.000150164	TRUE	UP
TC0200003698.mm.2	Abcb11	1.3075	0.0182932	0.00015027	TRUE	UP
TC0900001200.mm.2	Pcolce2	2.0375	0.0184097	0.000155652	TRUE	UP
TC0200000352.mm.2	Apbb1ip	1.775	0.0185248	0.000157669	TRUE	UP
TC1700000990.mm.2	Adgre4	1.63	0.0185663	0.000159694	TRUE	UP
TC0500000547.mm.2	Stim2	2.3975	0.0188278	0.000162791	TRUE	UP
TC1200002518.mm.2	Asap2	2.425	0.0188608	0.00016751	TRUE	UP
TC0700004207.mm.2	Igsf6	1.6975	0.0188608	0.000168853	TRUE	UP
TC0900000659.mm.2	Idh3a	1.79	0.0190812	0.000173289	TRUE	UP
TC0700003850.mm.2	Il18bp	1.4575	0.0190812	0.000173574	TRUE	UP
TC0X00002453.mm.2	G6pdx	1.63	0.0193011	0.000180859	TRUE	UP
TC1900000566.mm.2	Cyp2c39	3.2475	0.0193011	0.000181659	TRUE	UP
TC1700000934.mm.2	Treml4	1.955	0.0196433	0.000185834	TRUE	UP
TC1900001123.mm.2	AW112010	2.255	0.0196433	0.000186649	TRUE	UP
TC0600000841.mm.2	St3gal5	2.2125	0.0201468	0.000194826	TRUE	UP
TC0600003337.mm.2	Arhgdib	1.0775	0.0201468	0.000195651	TRUE	UP
TC1700001265.mm.2	Abcg8	1.9725	0.0201468	0.000196449	TRUE	UP
TC1900001355.mm.2	Gldc	1.8175	0.0201468	0.000196877	TRUE	UP
TC1100001115.mm.2	Ssh2	1.235	0.0202722	0.000199302	TRUE	UP
TC0400002633.mm.2	Acnat2	3.19	0.020489	0.000206271	TRUE	UP
TC0900000051.mm.2	Mmp27	2.67	0.020489	0.000207603	TRUE	UP
TC1500001736.mm.2	9030619P08Rik	8.6675	0.0207987	0.000211677	TRUE	UP
TC0600003329.mm.2	Plbd1	1.6675	0.0208716	0.000215392	TRUE	UP
TC1100004059.mm.2	Cd300e	1.7225	0.0208716	0.000217119	TRUE	UP
TC1900000709.mm.2	As3mt	1.32	0.0213391	0.00022701	TRUE	UP
TC1700002778.mm.2	Tapbp	0.855	0.0213391	0.000229585	TRUE	UP
TC1700001194.mm.2	Qpct	1.76	0.0213391	0.000229598	TRUE	UP
TC1500001728.mm.2	Ly6a	3.9825	0.0213391	0.000230216	TRUE	UP
TC1500001730.mm.2	Ly6c2	2.015	0.0224227	0.000244392	TRUE	UP
TC0100003593.mm.2	AI607873	1.825	0.0236727	0.00026913	TRUE	UP
TC1900001767.mm.2	Slc22a29	3.6175	0.0236727	0.000269714	TRUE	UP
TC1800001437.mm.2	Adrb2	2.04	0.0237154	0.000277673	TRUE	UP
TC1500000045.mm.2	Lifr	1.5825	0.0242685	0.000287427	TRUE	UP
TC0800000679.mm.2	44256	1.48	0.0244859	0.00029331	TRUE	UP
TC0700002644.mm.2	Axl	2.2475	0.024549	0.000295171	TRUE	UP
TC0100003888.mm.2	Ifi204	1.7625	0.0250648	0.000302711	TRUE	UP
TC1300000157.mm.2	Aoah	1.175	0.0257463	0.000315365	TRUE	UP
TC1800000249.mm.2	Lims2	2.1175	0.0258088	0.000317293	TRUE	UP
TC0100003319.mm.2	Soat1	1.455	0.0265808	0.000333966	TRUE	UP
TC1300000191.mm.2	Hist1h2bk	0.8725	0.0271891	0.000347079	TRUE	UP
TC0400000743.mm.2	Tlr4	1.0075	0.0274012	0.000352912	TRUE	UP
TC0200001368.mm.2	Spi1	2.25	0.0274429	0.00035682	TRUE	UP
TC0400001514.mm.2	Fndc5	2.4875	0.0274843	0.000358932	TRUE	UP
TC1800001307.mm.2	Cdo1	0.7675	0.0275226	0.000360671	TRUE	UP
TC0600002121.mm.2	Slc37a3	1.65	0.0276427	0.000364287	TRUE	UP
TC0200002295.mm.2	H13	1.03	0.0276427	0.000364736	TRUE	UP
TC0600001371.mm.2	Slc6a12	2.03	0.0277581	0.000367508	TRUE	UP
TC0600001532.mm.2	Clec12a	2.06	0.027953	0.000371347	TRUE	UP
TC1900000225.mm.2	Ms4a6b	1.4275	0.0285132	0.000382099	TRUE	UP
TC0400003794.mm.2	C1qa	2.09	0.0285132	0.000383926	TRUE	UP
TC1100002921.mm.2	Ulk2	1.3225	0.0287	0.000387733	TRUE	UP
TC0500001775.mm.2	Cyp3a59	2.4225	0.0289882	0.000395543	TRUE	UP
TC0100003591.mm.2	Pydc4	2.2725	0.0292216	0.000400044	TRUE	UP
TC1000003140.mm.2	Coq10a	1.105	0.030057	0.00041554	TRUE	UP
TC0400002634.mm.2	Acnat1	2.97	0.0303129	0.000423174	TRUE	UP
TC1700002414.mm.2	Rab31	0.9525	0.0305504	0.000427865	TRUE	UP
TC0500002219.mm.2	Letm1	1.5675	0.0307111	0.000432319	TRUE	UP
TC0500003050.mm.2	Selplg	1.0675	0.0307111	0.000433921	TRUE	UP
TC0400003681.mm.2	Themis2	2.4775	0.0310829	0.000445596	TRUE	UP
TC0X00001024.mm.2	Chic1	2.2125	0.0310829	0.000449321	TRUE	UP
TC1600001042.mm.2	Cbr1	1.6775	0.0320746	0.000476102	TRUE	UP
TC0900002389.mm.2	Pml	1.1875	0.0320746	0.000476656	TRUE	UP
TC0400002849.mm.2	Megf9	1	0.0321095	0.00047862	TRUE	UP
TC1900001498.mm.2	Blnk	1.1425	0.0326493	0.000491709	TRUE	UP
TC0X00002676.mm.2	Vsig4	1.865	0.0326493	0.000492519	TRUE	UP
TC1100003055.mm.2	Cd68	1.8875	0.0326493	0.000494241	TRUE	UP
TC0100001522.mm.2	Adcy10	3.5975	0.0326493	0.000494327	TRUE	UP
TC1500001727.mm.2	Ly6i	1.825	0.0326493	0.00049572	TRUE	UP
TC0100003124.mm.2	Rnpep	1.16	0.0326989	0.000499296	TRUE	UP
TC1800000625.mm.2	Csf1r	1.805	0.0330811	0.000508001	TRUE	UP
TC0400000961.mm.2	Fggy	0.9825	0.0335328	0.000519468	TRUE	UP
TC0400001229.mm.2	Cyp4a31	4.7275	0.034309	0.000537869	TRUE	UP
TC0400002474.mm.2	Enho	1.6025	0.0350401	0.000558597	TRUE	UP
TC0X00000122.mm.2	Sytl5	2.94	0.0350405	0.000560181	TRUE	UP
TC0200004651.mm.2	Rnf24	1.9675	0.0353605	0.000570074	TRUE	UP
TC1100001520.mm.2	Copz2	0.785	0.0364519	0.000593124	TRUE	UP
TC1000000171.mm.2	Sgk1	2.1075	0.0364519	0.000594235	TRUE	UP
TC0400003208.mm.2	Acot11	1.8675	0.0372384	0.00061242	TRUE	UP
TC1800001175.mm.2	Slc23a1	2.52	0.0374039	0.000621546	TRUE	UP
TC1700001993.mm.2	H2-T24	0.98	0.0376599	0.000627495	TRUE	UP
TC0700002970.mm.2	Nr1h2	0.65	0.0381558	0.000637476	TRUE	UP
TC0X00001934.mm.2	Cfp	1.9125	0.0382488	0.00064208	TRUE	UP
TC0500000591.mm.2	Tbc1d1	1.03	0.0382726	0.000644599	TRUE	UP
TC0900001046.mm.2	Ick	1.165	0.0388742	0.000658232	TRUE	UP
TC0700001178.mm.2	Tm6sf1	1.2375	0.0388781	0.000661621	TRUE	UP
TC1000000674.mm.2	Slc16a9	1.135	0.0390095	0.000669935	TRUE	UP
TC0500002755.mm.2	Cxcl9	2.1825	0.0390095	0.000673059	TRUE	UP
TC0500003599.mm.2	Cyp3a44	4.53	0.0390095	0.000686583	TRUE	UP
TC1700000085.mm.2	Mpc1	0.945	0.0390095	0.000689858	TRUE	UP
TC1100003382.mm.2	Slfn8	1.345	0.039334	0.00069961	TRUE	UP
TC0600001398.mm.2	Clec4a3	1.6625	0.039334	0.000701444	TRUE	UP
TC0800002403.mm.2	Ifi30	1.9375	0.0401976	0.000724101	TRUE	UP
TC0500002699.mm.2	Sult1d1	2.37	0.0403492	0.000738031	TRUE	UP
TC0700000561.mm.2	Tyrobp	1.3775	0.0403492	0.000743192	TRUE	UP
TC0600002045.mm.2	Akr1b3; Gm6644	0.84	0.0403492	0.000744661	TRUE	UP
TC0100002544.mm.2	Fn1	0.99	0.0403492	0.000744986	TRUE	UP
TC1300002083.mm.2	Lect2	1.1975	0.0411817	0.000765921	TRUE	UP
TC0700004011.mm.2	Gm1966	1.5375	0.0421192	0.000786227	TRUE	UP
TC0500003095.mm.2	Dynll1	1.315	0.042396	0.000794234	TRUE	UP
TC1800000677.mm.2	Zfp532	1	0.0429875	0.000810314	TRUE	UP
TC0X00003358.mm.2	Tmsb4x	1.9425	0.0429875	0.000812203	TRUE	UP
TC1100000268.mm.2	Gm12070	0.6475	0.0433916	0.000824609	TRUE	UP
TC0400003724.mm.2	Cd52	1.3725	0.0437049	0.00083313	TRUE	UP
TC1200002434.mm.2	Akt1	1.3875	0.0437049	0.000834499	TRUE	UP
TC0600000362.mm.2	Trim24	3.205	0.0441336	0.000844671	TRUE	UP
TC0100003590.mm.2	BC094916	1.0325	0.0444543	0.000855081	TRUE	UP
TC0900002115.mm.2	Sc5d	0.765	0.044519	0.000866082	TRUE	UP
TC0700004610.mm.2	Ccnd1; Mir3962	2.0475	0.0450534	0.000888845	TRUE	UP
TC0300001641.mm.2	Fabp12	3.3475	0.0450534	0.00089243	TRUE	UP
TC0700004291.mm.2	Sult1a1	2.2475	0.0450534	0.000901996	TRUE	UP
TC1200002269.mm.2	Ifi27l2a	1.56	0.0455918	0.000919802	TRUE	UP
TC1700000839.mm.2	Rcan2	2.16	0.0457655	0.000928188	TRUE	UP
TC1900000224.mm.2	Gm8369	1.57	0.0458174	0.000935461	TRUE	UP
TC1700001522.mm.2	Fpr1	2.4075	0.0458174	0.000938797	TRUE	UP
TC1300001777.mm.2	Serpinb6a	1.1425	0.0459345	0.000943264	TRUE	UP
TC0600003236.mm.2	Clec7a	1.895	0.0459537	0.000949868	TRUE	UP
TC1100000362.mm.2	Lcp2	1.755	0.0460287	0.00095349	TRUE	UP
TC1400002161.mm.2	Phf11a	1.4	0.0462405	0.00095996	TRUE	UP
TC0500003463.mm.2	Pilra	1.98	0.0466042	0.000971707	TRUE	UP
TC1600000484.mm.2	Ropn1	0.8775	0.0467628	0.000977226	TRUE	UP
TC1000001701.mm.2	Ginm1	1.7625	0.0467628	0.000979226	TRUE	UP
TC0100000847.mm.2	Spp2	2.2525	0.0468033	0.000982766	TRUE	UP
TC0X00001047.mm.2	Uprt	1.1225	0.0468911	0.000992225	TRUE	UP
TC0700003406.mm.2	Klf13	1.1675	0.0468911	0.000992471	TRUE	UP
TC1700001952.mm.2	Aif1	1.505	0.0477	0.00102447	TRUE	UP
TC0200000274.mm.2	Plxdc2	1.595	0.0477	0.00102794	TRUE	UP
TC0500002840.mm.2	Plac8	1.79	0.0477	0.00103357	TRUE	UP
TC0500003181.mm.2	Oas1a	1.875	0.0477	0.00103497	TRUE	UP
TC0800001207.mm.2	D230025D16Rik	1.0775	0.0477	0.00103514	TRUE	UP
TC0100002324.mm.2	Mfsd6	1.445	0.0477474	0.0010407	TRUE	UP
TC0500002651.mm.2	Igfbp7	1.175	0.0480114	0.00105081	TRUE	UP
TC0500003202.mm.2	Cux2	4.58	0.0480114	0.00105614	TRUE	UP
TC1000000812.mm.2	Bsg	0.8475	0.0480114	0.00105726	TRUE	UP
TC0600000388.mm.2	Tbxas1	1.85	0.048511	0.00108142	TRUE	UP
TC0900003199.mm.2	Tgfbr2	0.935	0.048511	0.00108162	TRUE	UP
TC1300000919.mm.2	Glrx	1.535	0.0495028	0.00110794	TRUE	UP
TC0500000527.mm.2	Sod3	1.4625	0.0495306	0.00111302	TRUE	UP
TC1400000459.mm.2	Ear12; Ear2; Ear3	1.4775	0.0507203	0.00114661	TRUE	UP
TC1200002272.mm.2	Serpina6	2.0025	0.0520908	0.00119055	TRUE	UP
TC1900001425.mm.2	Slc16a12	0.755	0.0520908	0.00119428	TRUE	UP
TC0200000013.mm.2	Fam107b	2.0025	0.0520908	0.00119622	TRUE	UP
TC1100001632.mm.2	Stat5a	1.505	0.0520908	0.00119636	TRUE	UP
TC1100004242.mm.2	Sectm1a	0.7575	0.0526313	0.0012182	TRUE	UP
TC0600000182.mm.2	Cped1	0.9325	0.0526313	0.00121825	TRUE	UP
TC1600000930.mm.2	Gm21833	1.47	0.0526752	0.0012248	TRUE	UP
TC1300000763.mm.2	Mir23b; Mir27b; Mir24-1; 2010111I01Rik	0.685	0.0526752	0.00122876	TRUE	UP
TC0700000806.mm.2	Josd2; Mir7052	1.1025	0.0529638	0.00123813	TRUE	UP
TC1500001606.mm.2	Fam84b	1.8875	0.0529638	0.00124026	TRUE	UP
TC0X00003437.mm.2	Il2rg	1.8575	0.0535507	0.00126107	TRUE	UP
TC0100002690.mm.2	Pid1	1.2975	0.0535507	0.00126232	TRUE	UP
TC0900001232.mm.2	Rbp1	2.855	0.0546057	0.00129592	TRUE	UP
TC0300000307.mm.2	Hspa4l	1.3175	0.0546885	0.00130198	TRUE	UP
TC1700002132.mm.2	Slc25a27	1.975	0.0550133	0.00131644	TRUE	UP
TC1000000030.mm.2	Esr1	2.275	0.0550133	0.00132012	TRUE	UP
TC1200001237.mm.2	Tnfaip2	1.8275	0.0558238	0.00135938	TRUE	UP
TC0100003320.mm.2	Tor3a	1.0075	0.0560514	0.00137062	TRUE	UP
TC1500001935.mm.2	Desi1	1.0075	0.0560955	0.00138403	TRUE	UP
TC0500000349.mm.2	Ywhah	0.8575	0.0560955	0.00138497	TRUE	UP
TC1400002054.mm.2	Slc7a7	1.875	0.0567799	0.00141144	TRUE	UP
TC1800001197.mm.2	Cd14	1.485	0.0571043	0.00142465	TRUE	UP
TC1100002897.mm.2	Shmt1	1.3425	0.0572059	0.00143106	TRUE	UP
TC1800001181.mm.2	Tmem173	1.4225	0.0572059	0.00143234	TRUE	UP
TC1000002878.mm.2	Glipr1	1.6175	0.0573412	0.00146101	TRUE	UP
TC0400002216.mm.2	Pdp1	2.65	0.0573412	0.00146253	TRUE	UP
TC0900001128.mm.2	Nt5e	3.945	0.0573412	0.00146413	TRUE	UP
TC0600001035.mm.2	Mgll	1.4775	0.0573663	0.00146994	TRUE	UP
TC0600001418.mm.2	Cd163	1.5325	0.0576297	0.00148374	TRUE	UP
TC1000000547.mm.2	Psap	0.5875	0.0576297	0.00148581	TRUE	UP
TC0900001459.mm.2	Scap	1.01	0.0576297	0.00148707	TRUE	UP
TC0500003532.mm.2	Mmd2	5.3325	0.0578858	0.00149628	TRUE	UP
TC1100003300.mm.2	Tmem97	1.1025	0.0580881	0.00151197	TRUE	UP
TC0300000948.mm.2	Hfe2	1.2875	0.0582166	0.00152319	TRUE	UP
TC1400001086.mm.2	Epsti1	1.385	0.0583206	0.00152853	TRUE	UP
TC0200001801.mm.2	Tmem62	1.0925	0.0590882	0.00155741	TRUE	UP
TC1300000612.mm.2	Syk	1.4375	0.0590882	0.00156462	TRUE	UP
TC1700002804.mm.2	Pigq	0.85	0.059112	0.00157057	TRUE	UP
TC0500003464.mm.2	Pilrb1	1.515	0.0610715	0.00163638	TRUE	UP
TC1100003314.mm.2	Lgals9	0.7475	0.0618631	0.00166704	TRUE	UP
TC1900001203.mm.2	Psat1	2.44	0.0618631	0.00167066	TRUE	UP
TC0400000377.mm.2	Dnaic1	4.1375	0.0618631	0.00168488	TRUE	UP
TC0400002980.mm.2	Plin2	1.02	0.061969	0.00169392	TRUE	UP
TC0100002772.mm.2	A730008H23Rik; Hjurp; 6430706D22Rik	1.8375	0.0621369	0.0017041	TRUE	UP
TC0900002501.mm.2	Slc24a1	0.6925	0.062771	0.00172715	TRUE	UP
TC0900003182.mm.2	Stt3b	0.79	0.0629744	0.00174208	TRUE	UP
TC0900000199.mm.2	AB124611	1.25	0.0629744	0.00174524	TRUE	UP
TC1500001450.mm.2	Angpt1	2.4475	0.0629744	0.00175624	TRUE	UP
TC0100001617.mm.2	Tagln2	1.61	0.0629744	0.00176678	TRUE	UP
TC0900003335.mm.2	Uba7	0.7575	0.0635529	0.00179159	TRUE	UP
TC1300001020.mm.2	Ssbp2	0.8025	0.0648643	0.00184025	TRUE	UP
TC0400003241.mm.2	Gpx7	0.7625	0.0652469	0.00185705	TRUE	UP
TC1200002531.mm.2	Serpina1b	0.73	0.0652469	0.00185863	TRUE	UP
TC1100004229.mm.2	Cbr2	0.9775	0.0652469	0.00185992	TRUE	UP
TC1900000987.mm.2	Frmd8	1.635	0.0653994	0.00187015	TRUE	UP
TC1100001267.mm.2	Wfdc21	0.83	0.0658649	0.00188879	TRUE	UP
TC0300003077.mm.2	Sh3glb1	0.94	0.0661637	0.00190095	TRUE	UP
TC1100000302.mm.2	Rtn4	0.9425	0.0662581	0.00190664	TRUE	UP
TC1000002930.mm.2	Lyz1	1.5125	0.066281	0.00191029	TRUE	UP
TC0500001773.mm.2	Cyp3a57	1.8625	0.066496	0.00191948	TRUE	UP
TC1900001630.mm.2	Sh3pxd2a	1.39	0.0665935	0.00192529	TRUE	UP
TC0X00003430.mm.2	Arhgap4	0.995	0.06724	0.00196215	TRUE	UP
TC0400002799.mm.2	Akna	0.8725	0.0675437	0.00197979	TRUE	UP
TC0200003017.mm.2	Nebl	1.3425	0.0675437	0.00198234	TRUE	UP
TC1100003326.mm.2	Evi2a; Evi2b; Gm21975	1.85	0.0678888	0.00199637	TRUE	UP
TC0600001093.mm.2	Ccdc174	0.77	0.0679549	0.0020084	TRUE	UP
TC0500003730.mm.2	Gbp9	1.0275	0.0679549	0.00201918	TRUE	UP
TC1700001986.mm.2	Atat1	1.33	0.0679549	0.00201973	TRUE	UP
TC0900002293.mm.2	Gm6981	0.675	0.0681168	0.00203899	TRUE	UP
TC0700000972.mm.2	E030018B13Rik	3.08	0.0681168	0.00203906	TRUE	UP
TC0200002594.mm.2	Cebpb	1.5025	0.068567	0.00206234	TRUE	UP
TC0800001307.mm.2	Tat	1.0925	0.068567	0.00206263	TRUE	UP
TC0700001098.mm.2	Klhl25	0.9125	0.0688651	0.0020812	TRUE	UP
TC0300000137.mm.2	Cp	0.7925	0.0688651	0.00208784	TRUE	UP
TC0400002077.mm.2	Gnb1	0.6075	0.0688651	0.0021	TRUE	UP
TC0400002151.mm.2	Cyp7a1	1.585	0.0690285	0.00211471	TRUE	UP
TC1900001622.mm.2	Calhm2	1.065	0.0690285	0.00211675	TRUE	UP
TC0500000663.mm.2	Gabrb1	0.905	0.0690285	0.00212003	TRUE	UP
TC0500000468.mm.2	Cd38	1.5175	0.0691682	0.00212776	TRUE	UP
TC0700004530.mm.2	Irf7	2.585	0.0694953	0.00215314	TRUE	UP
TC0600001397.mm.2	Clec4a1	1.5475	0.0695915	0.00216553	TRUE	UP
TC0600001207.mm.2	Edem1	0.8925	0.0696729	0.00217747	TRUE	UP
TC1100000343.mm.2	Stk10	1.36	0.0698933	0.00219842	TRUE	UP
TC0700004631.mm.2	Pirb	1.4725	0.0698933	0.00219901	TRUE	UP
TC0X00000916.mm.2	Msn	0.81	0.0708501	0.00223979	TRUE	UP
TC1000001190.mm.2	Lum	1.0475	0.0708518	0.00224303	TRUE	UP
TC0200003051.mm.2	Pip4k2a	0.8575	0.0711401	0.00225986	TRUE	UP
TC1500002075.mm.2	Abcd2	3.52	0.0711401	0.0022625	TRUE	UP
TC0500002700.mm.2	Sult1e1	1.9675	0.0721866	0.0023178	TRUE	UP
TC1900001482.mm.2	Cyp2c70	1.81	0.072866	0.00234546	TRUE	UP
TC1100000916.mm.2	Trp53	0.5875	0.072866	0.00234836	TRUE	UP
TC0400002392.mm.2	Zfp292	1.2825	0.0732031	0.00236584	TRUE	UP
TC0500001038.mm.2	Lrrc8b	1.0275	0.0732031	0.00236692	TRUE	UP
TC0800002119.mm.2	Asah1	0.645	0.0734537	0.00238495	TRUE	UP
TC0400001276.mm.2	Ptch2	0.945	0.0735174	0.00239277	TRUE	UP
TC1600001556.mm.2	Parp14	0.96	0.0735174	0.00239695	TRUE	UP
TC0600003433.mm.2	Itpr2	1.0025	0.0742187	0.0024265	TRUE	UP
TC0100001632.mm.2	Pyhin1	2.2425	0.074975	0.0024652	TRUE	UP
TC0100000143.mm.2	Khdc1b	0.765	0.074975	0.00247461	TRUE	UP
TC1300000045.mm.2	Idi1	2.325	0.074975	0.00247486	TRUE	UP
TC0700000424.mm.2	Tgfb1	1.0775	0.0751572	0.00248457	TRUE	UP
TC0200001300.mm.2	Olfr1140	1.125	0.0751572	0.00248764	TRUE	UP
TC0200003601.mm.2	Ly75	0.9475	0.0752952	0.0024956	TRUE	UP
TC0100000372.mm.2	Sdpr	2.46	0.0756937	0.00251962	TRUE	UP
TC1100002642.mm.2	Gm5431	1.0225	0.0756937	0.00252472	TRUE	UP
TC1900001484.mm.2	Pdlim1	1.52	0.0760326	0.00254401	TRUE	UP
TC1000002886.mm.2	Trhde	1.865	0.0761415	0.00255794	TRUE	UP
TC0100000216.mm.2	Dst	1.6025	0.0763822	0.00257794	TRUE	UP
TC1600001966.mm.2	App	0.815	0.0763822	0.00257941	TRUE	UP
TC1300001155.mm.2	Cd180	1.955	0.0763822	0.00258319	TRUE	UP
TC0700004132.mm.2	Rras2	0.605	0.0763822	0.00259354	TRUE	UP
TC1700001827.mm.2	Sik1	1.5275	0.0764556	0.00260292	TRUE	UP
TC1200001110.mm.2	Evl	1.015	0.0769008	0.00262637	TRUE	UP
TC1000000100.mm.2	Hivep2	1.2175	0.0769008	0.00263322	TRUE	UP
TC1800000060.mm.2	Fzd8	1.7375	0.0769008	0.00263588	TRUE	UP
TC1000003226.mm.2	Gstt3	4.4125	0.0769008	0.00263947	TRUE	UP
TC0700002143.mm.2	Lair1	1.6275	0.0769008	0.00264328	TRUE	UP
TC0600001369.mm.2	Usp18	1.29	0.0769008	0.00264876	TRUE	UP
TC1000000512.mm.2	Gcc2	0.67	0.0775156	0.00267443	TRUE	UP
TC0500003368.mm.2	Ncf1	1.525	0.0775156	0.00267741	TRUE	UP
TC0200002366.mm.2	Trp53inp2	1.9725	0.0778523	0.00270657	TRUE	UP
TC0700002372.mm.2	Sult2a1	0.9775	0.0778681	0.00272428	TRUE	UP
TC1300002090.mm.2	Klhl3	1.37	0.0780312	0.00273387	TRUE	UP
TC0300002506.mm.2	Fcgr1	1.83	0.0780422	0.0027448	TRUE	UP
TC1900000217.mm.2	Ms4a4c	1.95	0.078599	0.00278458	TRUE	UP
TC1600001944.mm.2	D16Ertd472e	0.775	0.078599	0.00278562	TRUE	UP
TC0100002413.mm.2	Raph1	0.695	0.0786309	0.00280029	TRUE	UP
TC1000002164.mm.2	Cep85l	1.2275	0.0786309	0.00280144	TRUE	UP
TC1900001506.mm.2	Pik3ap1	0.845	0.0786309	0.00280615	TRUE	UP
TC0600002221.mm.2	Zfp467	1.185	0.0793853	0.00287783	TRUE	UP
TC1900001476.mm.2	Cyp2c38	2.7375	0.0794641	0.00288548	TRUE	UP
TC1100003687.mm.2	Med24	0.8975	0.0794641	0.00288866	TRUE	UP
TC0500003685.mm.2	N4bp2l1	1.8125	0.0794641	0.00289143	TRUE	UP
TC1100000774.mm.2	Tnfrsf13b	0.945	0.07973	0.00291187	TRUE	UP
TC1200000459.mm.2	1700047I17Rik2; Fam177a	0.8275	0.0803914	0.00295552	TRUE	UP
TC1200000461.mm.2	1700047I17Rik2; Fam177a	0.8275	0.0803914	0.00295552	TRUE	UP
TC1200001272.mm.2	Pld4	1.81	0.0807671	0.00298612	TRUE	UP
TC0500003028.mm.2	Sgsm1	1.09	0.0810306	0.00300911	TRUE	UP
TC1500001828.mm.2	Csf2rb2; Mir7676-1; Mir7676-2	0.755	0.0812807	0.00302707	TRUE	UP
TC1700002573.mm.2	Atl2	1.2525	0.0813591	0.00303732	TRUE	UP
TC0100003889.mm.2	Mnda	1.4825	0.0813623	0.00304304	TRUE	UP
TC1100002015.mm.2	Baiap2	1.85	0.0813623	0.00304864	TRUE	UP
TC1400000076.mm.2	Pxk	0.785	0.0813623	0.00306345	TRUE	UP
TC0600002324.mm.2	Ggct	1.26	0.0813623	0.00307041	TRUE	UP
TC0600003135.mm.2	Gapdh	0.585	0.0816312	0.00308791	TRUE	UP
TC0500002046.mm.2	AI506816	0.9025	0.0823087	0.00313371	TRUE	UP
TC0300002054.mm.2	P2ry12	1.125	0.0823087	0.00313739	TRUE	UP
TC1200002251.mm.2	Lgmn	1.14	0.0823087	0.00314854	TRUE	UP
TC0200002094.mm.2	Gm17374	0.87	0.0823087	0.00315878	TRUE	UP
TC0800000948.mm.2	4930432K21Rik	0.74	0.0823087	0.00316017	TRUE	UP
TC1400002162.mm.2	Phf11b	1.7275	0.0826139	0.00318465	TRUE	UP
TC0800002734.mm.2	Ciapin1	0.705	0.0826139	0.00319104	TRUE	UP
TC0100000642.mm.2	Cyp27a1	0.66	0.0827616	0.00320521	TRUE	UP
TC1200000462.mm.2	Srp54c; Srp54b	1.085	0.0831006	0.00322957	TRUE	UP
TC0600001751.mm.2	Far2	0.65	0.0836386	0.00326387	TRUE	UP
TC1500000939.mm.2	Ano6	1.285	0.0836386	0.00327172	TRUE	UP
TC0200003599.mm.2	Cd302	0.7375	0.0843326	0.00331163	TRUE	UP
TC0100003401.mm.2	Fmo1	0.8075	0.084466	0.00332421	TRUE	UP
TC0200002308.mm.2	Hck	1.41	0.084466	0.00332448	TRUE	UP
TC1700002655.mm.2	Abcg5	1.6325	0.0850591	0.00335931	TRUE	UP
TC1100004124.mm.2	St6galnac2	0.8825	0.0851346	0.00336654	TRUE	UP
TC0600000325.mm.2	Akr1b10	1.2825	0.0851346	0.00336996	TRUE	UP
TC1100004053.mm.2	Cd300ld	1.4775	0.0857583	0.00339868	TRUE	UP
TC0X00000668.mm.2	Nsdhl	1.7375	0.0864932	0.00345802	TRUE	UP
TC0500003399.mm.2	Ccl24	1.7675	0.0865321	0.00346595	TRUE	UP
TC0100003204.mm.2	Rgs2	1.7275	0.0867117	0.00348305	TRUE	UP
TC0600002056.mm.2	Wdr91	0.6075	0.0872593	0.00352087	TRUE	UP
TC1300002119.mm.2	Golm1	1.245	0.0895684	0.0036342	TRUE	UP
TC0200003298.mm.2	Uck1	1.3325	0.0901523	0.00367413	TRUE	UP
TC0300000693.mm.2	Cd5l	2.325	0.0909095	0.00373365	TRUE	UP
TC1800001603.mm.2	Ctif	0.745	0.091015	0.00374208	TRUE	UP
TC1000001551.mm.2	B4galnt1	1.055	0.0912013	0.00376433	TRUE	UP
TC0400002079.mm.2	Nadk	1.31	0.091349	0.00377638	TRUE	UP
TC0600002663.mm.2	Rab43	1.0775	0.0913646	0.00378114	TRUE	UP
TC1100004291.mm.2	Psme2b	1.1375	0.0914922	0.00379351	TRUE	UP
TC0300001395.mm.2	Gm21962	0.92	0.0914922	0.00379467	TRUE	UP
TC0500002320.mm.2	Prom1	3.51	0.0916486	0.00380528	TRUE	UP
TC0500002919.mm.2	Tgfbr3	1.1625	0.0917669	0.0038259	TRUE	UP
TC0400000718.mm.2	Orm1	0.615	0.092118	0.00384966	TRUE	UP
TC1400000292.mm.2	Lrtm1	3.1225	0.0921918	0.0038592	TRUE	UP
TC1400001002.mm.2	Nudt18	1.5575	0.0936555	0.00397296	TRUE	UP
TC0500001894.mm.2	Cyp51	1.93	0.0936976	0.00398042	TRUE	UP
TC0100001634.mm.2	Pydc3	1.4575	0.0936976	0.00399504	TRUE	UP
TC1200002532.mm.2	Serpina1d	0.715	0.0936976	0.00399584	TRUE	UP
TC0X00000427.mm.2	Sash3	0.9075	0.0939907	0.00401257	TRUE	UP
TC1900001066.mm.2	Slc3a2	1.4525	0.0946208	0.00405652	TRUE	UP
TC0300002982.mm.2	Tet2	1.24	0.0947534	0.00406647	TRUE	UP
TC0100003240.mm.2	Prg4	1.795	0.0949875	0.00408079	TRUE	UP
TC0200000651.mm.2	Ptgs1	1.545	0.0955117	0.00412369	TRUE	UP
TC1700001184.mm.2	Gm19399	0.8725	0.0955117	0.00413451	TRUE	UP
TC1500000662.mm.2	H1f0	0.76	0.0955117	0.00413663	TRUE	UP
TC0200002972.mm.2	Itga8	0.9275	0.0955117	0.00414874	TRUE	UP
TC1700002422.mm.2	Ndufv2	0.8375	0.0962509	0.00421309	TRUE	UP
TC1300002531.mm.2	Naip5	1.0225	0.0964245	0.00422503	TRUE	UP
TC0800001244.mm.2	Pla2g15	0.7425	0.0967593	0.00424516	TRUE	UP
TC1200001030.mm.2	Ifi27	1.505	0.0967593	0.00424842	TRUE	UP
TC0200003165.mm.2	Fcna	1.93	0.0974444	0.00429252	TRUE	UP
TC0100002967.mm.2	Marco	1.745	0.0974444	0.00429605	TRUE	UP
TC0400000446.mm.2	Npr2	1.6475	0.0975091	0.00430533	TRUE	UP
TC0X00001069.mm.2	Tlr13	1.465	0.0975091	0.00430803	TRUE	UP
TC0400003271.mm.2	Cdkn2c	0.9125	0.0975091	0.00431667	TRUE	UP
TC0300001639.mm.2	Fabp4	1.315	0.0975091	0.00431987	TRUE	UP
TC0400000349.mm.2	Dnaja1; Mir207	0.91	0.0975091	0.00432426	TRUE	UP
TC1400001487.mm.2	Rarb	2.86	0.0975091	0.00432525	TRUE	UP
TC1300002258.mm.2	Zfp738	0.875	0.0978627	0.00434975	TRUE	UP
TC0700002134.mm.2	Leng1; Tmc4	0.62	0.0978754	0.00435472	TRUE	UP
TC1500001262.mm.2	Gm5803	0.8675	0.0979178	0.00436101	TRUE	UP
TC1100001147.mm.2	Tlcd1; Mir7653	0.635	0.0979519	0.00437539	TRUE	UP
TC1400001012.mm.2	Gfra2	1.4	0.0979519	0.00437904	TRUE	UP
TC1000000744.mm.2	Lss	1.4825	0.0979519	0.00438908	TRUE	UP
TC0700003028.mm.2	Emp3	1.33	0.0983991	0.00443984	TRUE	UP
TC0500002415.mm.2	Sepsecs	0.7375	0.0987417	0.0044733	TRUE	UP
TC0X00003399.mm.2	Sh3bgrl	1.215	0.0988587	0.00448751	TRUE	UP
TC1200002230.mm.2	Rps6ka5	0.8175	0.0990449	0.00450488	TRUE	UP
TC1100002176.mm.2	Myo1g	1.295	0.0994134	0.00453822	TRUE	UP
TC0800001112.mm.2	Cpne2	1.5275	0.0994134	0.0045485	TRUE	UP
TC1500000757.mm.2	Cyp2d9	-6.3975	0.000435092	1.79331e-07	TRUE	DOWN
TC1100003561.mm.2	Abcc3	-5.3075	0.000505001	2.50158e-07	TRUE	DOWN
TC1500001945.mm.2	Cyp2d11; Mir7684	-2.915	0.000843914	5.83831e-07	TRUE	DOWN
TC1500001953.mm.2	Cyp2d13	-2.455	0.00130827	1.47287e-06	TRUE	DOWN
TC1500001946.mm.2	Cyp2d10	-1.42	0.00180178	2.19077e-06	TRUE	DOWN
TC1300002445.mm.2	Scamp1	-2.705	0.0024555	3.42792e-06	TRUE	DOWN
TC0400001087.mm.2	C8b	-3.6675	0.00295046	4.25176e-06	TRUE	DOWN
TC0600001296.mm.2	44263	-1.7675	0.0040441	6.37411e-06	TRUE	DOWN
TC1000002943.mm.2	Slc35e3	-1.785	0.0049281	9.54283e-06	TRUE	DOWN
TC0700004165.mm.2	Arl6ip1	-1.465	0.00497153	9.85082e-06	TRUE	DOWN
TC1100003276.mm.2	Pipox	-1.2025	0.00515928	1.04552e-05	TRUE	DOWN
TC1900001445.mm.2	Ppp1r3c	-6.0375	0.00522661	1.10624e-05	TRUE	DOWN
TC1500000014.mm.2	C6	-5.63	0.00526768	1.17687e-05	TRUE	DOWN
TC0600001515.mm.2	Clec2h	-5.63	0.00560092	1.28635e-05	TRUE	DOWN
TC0600003345.mm.2	Slc15a5	-3.695	0.0056362	1.31983e-05	TRUE	DOWN
TC0300000484.mm.2	Sucnr1	-4.2575	0.00590365	1.48881e-05	TRUE	DOWN
TC0600001424.mm.2	C1rb	-1.1275	0.00671739	1.78477e-05	TRUE	DOWN
TC0300001494.mm.2	Uox	-2.655	0.00692793	1.9655e-05	TRUE	DOWN
TC0X00002482.mm.2	Pls3	-0.9125	0.00694602	2.02167e-05	TRUE	DOWN
TC0300001322.mm.2	Etnppl	-6.985	0.00694602	2.04362e-05	TRUE	DOWN
TC0300002959.mm.2	Sgms2	-1.5625	0.00694602	2.06448e-05	TRUE	DOWN
TC1700001805.mm.2	Glo1	-2.2025	0.00753925	2.30869e-05	TRUE	DOWN
TC1500000760.mm.2	Cyp2d12	-2.125	0.00772641	2.50518e-05	TRUE	DOWN
TC0500002692.mm.2	Ugt2b36	-1.22	0.00821152	2.73723e-05	TRUE	DOWN
TC0600000902.mm.2	Eva1a	-1.4425	0.00821152	2.80244e-05	TRUE	DOWN
TC0500002882.mm.2	Hsd17b11	-1.7925	0.00821152	2.82596e-05	TRUE	DOWN
TC1200002535.mm.2	Serpina11	-2.13	0.00845831	3.00913e-05	TRUE	DOWN
TC1500001944.mm.2	Cyp2d22	-2.17	0.00854862	3.11737e-05	TRUE	DOWN
TC0100003104.mm.2	Adora1	-3.7375	0.00869965	3.29087e-05	TRUE	DOWN
TC0100000427.mm.2	Aox1	-3.135	0.0089926	3.54056e-05	TRUE	DOWN
TC0300002554.mm.2	Hsd3b5	-6.21	0.0089926	3.70536e-05	TRUE	DOWN
TC0600001421.mm.2	C1rl	-1.5925	0.0089926	3.71309e-05	TRUE	DOWN
TC1000002572.mm.2	Nfyb	-1.175	0.0089926	3.79388e-05	TRUE	DOWN
TC0200000006.mm.2	Dclre1c	-0.93	0.0089926	3.8172e-05	TRUE	DOWN
TC0300002553.mm.2	Hsd3b4; Gm10681	-5.0725	0.0089926	3.84714e-05	TRUE	DOWN
TC1000001895.mm.2	Enpp3	-2.0175	0.00921226	4.10706e-05	TRUE	DOWN
TC0500003576.mm.2	Baiap2l1	-1.4725	0.00954966	4.47251e-05	TRUE	DOWN
TC0500001751.mm.2	Bri3	-1.9375	0.0102533	4.91354e-05	TRUE	DOWN
TC1500001955.mm.2	Cyp2d40	-1.075	0.0102533	4.93632e-05	TRUE	DOWN
TC1900001477.mm.2	Cyp2c67	-4.175	0.0102533	4.98673e-05	TRUE	DOWN
TC1300000442.mm.2	Dsp	-2.4475	0.010876	5.43653e-05	TRUE	DOWN
TC1500002328.mm.2	Agxt2	-2.115	0.0109041	5.49967e-05	TRUE	DOWN
TC0500002693.mm.2	Ugt2b5	-1.665	0.0117215	6.28145e-05	TRUE	DOWN
TC1400001655.mm.2	Il17rb	-3.2075	0.011752	6.35074e-05	TRUE	DOWN
TC0200005211.mm.2	Adnp; Dpm1	-1.0925	0.0118065	6.48652e-05	TRUE	DOWN
TC0300002957.mm.2	Cyp2u1	-5.72	0.0124347	7.24763e-05	TRUE	DOWN
TC0700001252.mm.2	Nox4	-6.4	0.0124347	7.27959e-05	TRUE	DOWN
TC1500001531.mm.2	Enpp2	-3.4075	0.012716	7.55881e-05	TRUE	DOWN
TC1000003127.mm.2	Hsd17b6	-5.47	0.0135669	8.24791e-05	TRUE	DOWN
TC0400002606.mm.2	Gabbr2	-3.96	0.0143339	8.84328e-05	TRUE	DOWN
TC1200000614.mm.2	Daam1	-0.9375	0.0143568	9.00651e-05	TRUE	DOWN
TC1500001783.mm.2	Slc39a4	-2.7975	0.0149086	9.50991e-05	TRUE	DOWN
TC0600001422.mm.2	C1ra	-1.0925	0.0149086	9.53755e-05	TRUE	DOWN
TC0400003344.mm.2	Akr1a1	-0.7675	0.0149086	9.60072e-05	TRUE	DOWN
TC1000000590.mm.2	Slc25a16	-0.6875	0.0151339	0.000100184	TRUE	DOWN
TC1900001485.mm.2	Sorbs1	-1.74	0.0151503	0.000100975	TRUE	DOWN
TC0700001615.mm.2	Akip1	-0.95	0.0163757	0.000110617	TRUE	DOWN
TC0200003880.mm.2	Serping1	-1.15	0.0168295	0.000116176	TRUE	DOWN
TC1500001957.mm.2	Cyp2d26	-0.955	0.0176136	0.000126911	TRUE	DOWN
TC0600003428.mm.2	Bhlhe41	-2.8825	0.0178316	0.000129284	TRUE	DOWN
TC1300001494.mm.2	Sugct	-1.43	0.0181294	0.00013226	TRUE	DOWN
TC0800001133.mm.2	Mmp15	-2.8	0.0182228	0.000138869	TRUE	DOWN
TC0700002720.mm.2	Spint2	-1.62	0.0182228	0.000140488	TRUE	DOWN
TC0400001681.mm.2	Tcea3	-2.2325	0.0182228	0.000141017	TRUE	DOWN
TC1500001764.mm.2	Nrbp2	-1.4	0.0182228	0.000141147	TRUE	DOWN
TC0700001715.mm.2	Acsm3	-1.4725	0.0182932	0.000142831	TRUE	DOWN
TC0500000837.mm.2	5830473C10Rik	-2.385	0.0182932	0.000147905	TRUE	DOWN
TC0700000652.mm.2	Cebpa	-1.65	0.0182932	0.000148761	TRUE	DOWN
TC0X00003057.mm.2	Serpina7	-5.6875	0.0182932	0.000150755	TRUE	DOWN
TC1700000832.mm.2	Adgrf1	-5.16	0.0184097	0.000155331	TRUE	DOWN
TC1800001461.mm.2	Fech	-1.2125	0.0184097	0.000155842	TRUE	DOWN
TC0500001673.mm.2	Gpr146; D830046C22Rik	-1.8025	0.0184097	0.00015586	TRUE	DOWN
TC1000000746.mm.2	Ftcd	-0.7325	0.0188608	0.000166261	TRUE	DOWN
TC0600003600.mm.2	Cml5	-2.3925	0.0188608	0.00016697	TRUE	DOWN
TC1500002056.mm.2	Arsa	-2.4775	0.0188608	0.00016799	TRUE	DOWN
TC0500000488.mm.2	Lap3	-1.91	0.0188608	0.000169022	TRUE	DOWN
TC0200004973.mm.2	Eif6	-1.15	0.0190812	0.000171942	TRUE	DOWN
TC0400004088.mm.2	Zbtb48	-1.585	0.0193011	0.000176978	TRUE	DOWN
TC1300001378.mm.2	Akr1c12	-1.3225	0.0193011	0.000178353	TRUE	DOWN
TC1500000072.mm.2	Ugt3a1	-3.7325	0.0193011	0.000178947	TRUE	DOWN
TC0300000555.mm.2	Mfsd1	-0.765	0.0193011	0.000179868	TRUE	DOWN
TC0400001034.mm.2	Ak4	-2.165	0.0193011	0.00018104	TRUE	DOWN
TC0800002704.mm.2	Ces1e	-1.915	0.0199182	0.000190158	TRUE	DOWN
TC0200001773.mm.2	Chp1	-0.9475	0.0201426	0.000193208	TRUE	DOWN
TC0500001663.mm.2	Fam20c	-0.9675	0.0202722	0.000200719	TRUE	DOWN
TC0400003184.mm.2	C8a	-4.675	0.0202722	0.000200842	TRUE	DOWN
TC0300002725.mm.2	Gstm1	-0.6625	0.0203554	0.000202582	TRUE	DOWN
TC0100002601.mm.2	Abcb6	-1.8825	0.0203878	0.000203823	TRUE	DOWN
TC0300003103.mm.2	Dnase2b	-2.055	0.020489	0.000207367	TRUE	DOWN
TC0600001458.mm.2	Scnn1a	-2.3	0.0208716	0.000214014	TRUE	DOWN
TC1300002196.mm.2	Slc35d2	-1.235	0.0208716	0.000216334	TRUE	DOWN
TC1200000236.mm.2	Adi1	-1.43	0.0213391	0.000226043	TRUE	DOWN
TC1200000839.mm.2	Mfsd7c	-1.665	0.0213391	0.000226329	TRUE	DOWN
TC0900001099.mm.2	Sh3bgrl2	-1.3225	0.0213391	0.000227184	TRUE	DOWN
TC0300002551.mm.2	Hsd3b4; Gm10681; Gm4450	-5.84	0.0213391	0.000231206	TRUE	DOWN
TC0400003234.mm.2	Scp2	-3.435	0.0213391	0.000231592	TRUE	DOWN
TC0200004690.mm.2	Hao1	-1.9875	0.0224227	0.000245372	TRUE	DOWN
TC0700001624.mm.2	Wee1	-1.5975	0.0226653	0.000249047	TRUE	DOWN
TC1100001875.mm.2	Ttyh2	-1.065	0.0229808	0.000254583	TRUE	DOWN
TC1800000103.mm.2	Lama3	-2.3375	0.0230191	0.000256045	TRUE	DOWN
TC0400001970.mm.2	Slc2a5	-3.2575	0.023362	0.00026091	TRUE	DOWN
TC1300000020.mm.2	Akr1c19	-2.0875	0.0235957	0.000264583	TRUE	DOWN
TC0600003374.mm.2	Gys2	-2.6675	0.0236727	0.000268461	TRUE	DOWN
TC1900000250.mm.2	Glyat	-0.81	0.0236727	0.000270814	TRUE	DOWN
TC0600002626.mm.2	Cml1	-1.5975	0.0236727	0.000273221	TRUE	DOWN
TC1700001621.mm.2	1600002H07Rik	-2.4375	0.0236727	0.00027392	TRUE	DOWN
TC0700004346.mm.2	Prss8	-2.355	0.0236727	0.000275679	TRUE	DOWN
TC1700001209.mm.2	Galm	-1.5725	0.0236727	0.000275773	TRUE	DOWN
TC0300002702.mm.2	Prok1	-2.1025	0.0236727	0.000276107	TRUE	DOWN
TC1100004064.mm.2	Fads6	-1.085	0.0241737	0.000284127	TRUE	DOWN
TC0100003374.mm.2	Prdx6	-0.71	0.0243078	0.000289816	TRUE	DOWN
TC0900001883.mm.2	Spc24	-0.6725	0.0250648	0.000303631	TRUE	DOWN
TC1500002180.mm.2	Ccnt1	-0.6775	0.0257455	0.000314195	TRUE	DOWN
TC0800000394.mm.2	Gsr	-0.915	0.0258798	0.000320076	TRUE	DOWN
TC0300001244.mm.2	Gclm	-1.255	0.0258798	0.000320497	TRUE	DOWN
TC0200003607.mm.2	Rbms1	-0.9475	0.0259803	0.00032291	TRUE	DOWN
TC0400001223.mm.2	Cyp4a12b	-9.97	0.0262204	0.000327076	TRUE	DOWN
TC1500002346.mm.2	Plec	-0.9525	0.0263799	0.000330254	TRUE	DOWN
TC1600000376.mm.2	Il1rap	-3.185	0.0268408	0.000338441	TRUE	DOWN
TC0700003769.mm.2	Aqp11	-1.86	0.0269327	0.000340813	TRUE	DOWN
TC0400002713.mm.2	Epb41l4b	-1.5025	0.0269645	0.00034243	TRUE	DOWN
TC0500002881.mm.2	Hsd17b13	-1.255	0.0271891	0.000347731	TRUE	DOWN
TC0700002383.mm.2	Sult2a8	-0.9625	0.0274429	0.000357155	TRUE	DOWN
TC0200005505.mm.2	4930402H24Rik; Gm14057	-0.705	0.0280654	0.000374104	TRUE	DOWN
TC0600000974.mm.2	Tprkb	-1.525	0.0285132	0.000383066	TRUE	DOWN
TC1400002756.mm.2	Ggact	-0.71	0.028988	0.000394234	TRUE	DOWN
TC0300001315.mm.2	Casp6	-1.7325	0.0292527	0.000401786	TRUE	DOWN
TC1600000940.mm.2	Gabpa	-0.6225	0.0297447	0.000409883	TRUE	DOWN
TC0400001141.mm.2	Echdc2	-1.935	0.0301813	0.000418618	TRUE	DOWN
TC0100001550.mm.2	Aldh9a1	-1.19	0.0303129	0.000422219	TRUE	DOWN
TC0900001416.mm.2	Dalrd3	-0.875	0.0307111	0.000434264	TRUE	DOWN
TC1000001286.mm.2	Osbpl8	-1.66	0.0309758	0.000439402	TRUE	DOWN
TC1000000079.mm.2	Shprh	-0.5875	0.0310829	0.000442941	TRUE	DOWN
TC1500001136.mm.2	Ghr	-1.2	0.0310829	0.000447533	TRUE	DOWN
TC1300001383.mm.2	Akr1e1	-0.6925	0.0310829	0.000447886	TRUE	DOWN
TC0700003905.mm.2	Olfr69	-0.5975	0.0310829	0.00044811	TRUE	DOWN
TC1800000590.mm.2	Isoc1	-0.8475	0.0315283	0.000458598	TRUE	DOWN
TC0900002942.mm.2	Pccb	-1.0725	0.0315283	0.000460018	TRUE	DOWN
TC0300001413.mm.2	Adh6-ps1	-4.78	0.0316625	0.000463403	TRUE	DOWN
TC0300001365.mm.2	Bdh2	-2.4675	0.0317945	0.000466766	TRUE	DOWN
TC1700002562.mm.2	Prkd3	-1.0575	0.0320746	0.000472339	TRUE	DOWN
TC1900001550.mm.2	Cyp2c44	-6.3875	0.0320746	0.000476222	TRUE	DOWN
TC1100000994.mm.2	Ggt6	-1.3675	0.0326493	0.000490496	TRUE	DOWN
TC0300000967.mm.2	Fmo5	-1.4475	0.0326493	0.000496959	TRUE	DOWN
TC0500000876.mm.2	Fam47e	-1.98	0.0326989	0.000500659	TRUE	DOWN
TC0900000664.mm.2	Ireb2	-1.3025	0.0331266	0.000510191	TRUE	DOWN
TC0900001038.mm.2	Gclc	-1.45	0.0335328	0.000519164	TRUE	DOWN
TC0500002244.mm.2	Lrpap1	-0.6175	0.0341626	0.00053217	TRUE	DOWN
TC0200000361.mm.2	Acbd5	-0.795	0.034309	0.000538132	TRUE	DOWN
TC0700000917.mm.2	Gas2	-2.5775	0.034309	0.000539216	TRUE	DOWN
TC0400000963.mm.2	Hook1	-1.1325	0.0350186	0.000553523	TRUE	DOWN
TC1100000940.mm.2	Asgr2	-2.055	0.0350272	0.00055681	TRUE	DOWN
TC1600001316.mm.2	Comt	-1.2925	0.0350272	0.000556814	TRUE	DOWN
TC1600000335.mm.2	St6gal1	-2.3425	0.035228	0.000564765	TRUE	DOWN
TC0500000373.mm.2	Rnf4	-0.625	0.035297	0.000567461	TRUE	DOWN
TC0300001221.mm.2	Dpyd	-1.645	0.0355612	0.000575324	TRUE	DOWN
TC0500002170.mm.2	Slc5a6	-1.355	0.0355612	0.000576512	TRUE	DOWN
TC0700003476.mm.2	Nr2f2	-1.315	0.0364809	0.000596352	TRUE	DOWN
TC1400001785.mm.2	Fam213a	-1.37	0.0372384	0.000611088	TRUE	DOWN
TC1900000896.mm.2	Gstp1	-2.5675	0.0372384	0.000613948	TRUE	DOWN
TC1000000240.mm.2	Arhgap18	-1.4475	0.0382488	0.000642476	TRUE	DOWN
TC0700003008.mm.2	Dhdh	-0.99	0.0383934	0.000648361	TRUE	DOWN
TC1700000567.mm.2	Cyp4f15	-0.815	0.0388781	0.000661799	TRUE	DOWN
TC0600003108.mm.2	C1s1	-0.8125	0.0390095	0.000666445	TRUE	DOWN
TC1000002645.mm.2	Chpt1	-2.0475	0.0390095	0.000670562	TRUE	DOWN
TC1300000983.mm.2	Tmem161b	-1.0325	0.0390095	0.000674694	TRUE	DOWN
TC0900001578.mm.2	Xylb	-1.41	0.0390095	0.0006791	TRUE	DOWN
TC1100000296.mm.2	Mtif2	-0.8925	0.0390095	0.000680772	TRUE	DOWN
TC0900003051.mm.2	Apeh	-0.9175	0.0390095	0.000681449	TRUE	DOWN
TC0900001070.mm.2	Myo6	-1.05	0.0390095	0.000684604	TRUE	DOWN
TC0900001050.mm.2	Gm10639	-1.755	0.0390095	0.000690115	TRUE	DOWN
TC1900001059.mm.2	Slc22a28	-1.4525	0.0390095	0.000690388	TRUE	DOWN
TC0900002601.mm.2	Lipc	-0.7625	0.0401976	0.0007225	TRUE	DOWN
TC0400001221.mm.2	Cyp4a12a	-11.31	0.0401976	0.000727707	TRUE	DOWN
TC1000003047.mm.2	Rassf3	-1.275	0.04028	0.000731011	TRUE	DOWN
TC0300003173.mm.2	Acadm	-1.3275	0.0403492	0.000735404	TRUE	DOWN
TC0700004599.mm.2	Nadsyn1	-1.0025	0.0403492	0.00073969	TRUE	DOWN
TC1200001583.mm.2	Sntg2	-2.155	0.0403492	0.000740683	TRUE	DOWN
TC1900000254.mm.2	Keg1	-5.3175	0.0408584	0.000758068	TRUE	DOWN
TC1200001921.mm.2	Tmem30b	-1.1325	0.0421192	0.00078715	TRUE	DOWN
TC1800000794.mm.2	Acaa2	-0.805	0.0429875	0.000813058	TRUE	DOWN
TC0200004725.mm.2	Tasp1	-0.725	0.0430803	0.000816753	TRUE	DOWN
TC0800001531.mm.2	Rhou	-2.505	0.0443207	0.000850249	TRUE	DOWN
TC1900000565.mm.2	Cyp2c29; Cyp2c53-ps	-1.655	0.0444543	0.000859091	TRUE	DOWN
TC0200003109.mm.2	Hnmt	-2.285	0.0444543	0.00086039	TRUE	DOWN
TC0900002379.mm.2	Cyp1a2	-1.5075	0.0444543	0.000860819	TRUE	DOWN
TC0400003097.mm.2	Cyp2j6	-1.27	0.0444931	0.000863574	TRUE	DOWN
TC1300000958.mm.2	Arrdc3	-1.385	0.0447436	0.000872466	TRUE	DOWN
TC0100003190.mm.2	Gm4788	-0.8975	0.0450534	0.000882086	TRUE	DOWN
TC0600001374.mm.2	Mug2	-1.9675	0.0450534	0.000889219	TRUE	DOWN
TC0X00001651.mm.2	Rbbp7	-0.7275	0.0450534	0.000892713	TRUE	DOWN
TC0600002616.mm.2	Gm4477	-1.2525	0.0450534	0.000896529	TRUE	DOWN
TC0100003352.mm.2	Rabgap1l	-0.7325	0.0450534	0.000897048	TRUE	DOWN
TC1500002282.mm.2	Krt8	-2.24	0.0450534	0.000902643	TRUE	DOWN
TC0100002305.mm.2	Nabp1	-0.745	0.0450534	0.000902853	TRUE	DOWN
TC0300001667.mm.2	Car1	-3.6825	0.0452554	0.000910976	TRUE	DOWN
TC0X00000534.mm.2	Gm364	-0.645	0.0456859	0.000923758	TRUE	DOWN
TC0500002690.mm.2	Ugt2b1	-1.525	0.0457655	0.00092949	TRUE	DOWN
TC0400000716.mm.2	Col27a1	-1.49	0.0458174	0.000933859	TRUE	DOWN
TC1400001661.mm.2	Itih3	-2.06	0.0458174	0.000937778	TRUE	DOWN
TC0600001283.mm.2	Mkrn2	-0.5925	0.0459537	0.000947663	TRUE	DOWN
TC1400001579.mm.2	Polr3a	-0.69	0.0459537	0.000949814	TRUE	DOWN
TC0500000791.mm.2	Ugt2b35	-1.1025	0.0465774	0.000969052	TRUE	DOWN
TC0800000975.mm.2	Hook2	-1.72	0.0468033	0.00098429	TRUE	DOWN
TC0400002174.mm.2	Car8	-1.5925	0.0468911	0.000990588	TRUE	DOWN
TC0400002717.mm.2	Ptpn3	-0.7875	0.0473981	0.00100534	TRUE	DOWN
TC0500003318.mm.2	Sbds	-0.6975	0.047444	0.00100845	TRUE	DOWN
TC0200003753.mm.2	Gpr155	-1.88	0.0477	0.0010259	TRUE	DOWN
TC0X00001501.mm.2	Alas2	-3.175	0.0477	0.00102606	TRUE	DOWN
TC0100001111.mm.2	Slc35f5	-0.9	0.0477	0.00102909	TRUE	DOWN
TC0400004058.mm.2	H6pd	-1.2225	0.0477	0.00103537	TRUE	DOWN
TC0700002023.mm.2	Cyp2e1	-1.57	0.0477474	0.00103961	TRUE	DOWN
TC0500003297.mm.2	Stx2	-0.5875	0.0480114	0.00105664	TRUE	DOWN
TC1700000009.mm.2	Tiam2	-1.73	0.0480114	0.00105717	TRUE	DOWN
TC0500001411.mm.2	Psmd9	-0.61	0.048511	0.00108108	TRUE	DOWN
TC0300000258.mm.2	Atp11b	-0.88	0.048511	0.00108255	TRUE	DOWN
TC1100000560.mm.2	Zfp354a	-0.665	0.048511	0.00108356	TRUE	DOWN
TC0300001414.mm.2	Adh4	-3.6925	0.0504779	0.00113886	TRUE	DOWN
TC1800000762.mm.2	Mbd2	-0.84	0.050766	0.00114993	TRUE	DOWN
TC0900003040.mm.2	Slc38a3	-0.6025	0.051227	0.00116444	TRUE	DOWN
TC1300000019.mm.2	Akr1c13	-1.15	0.051227	0.00116498	TRUE	DOWN
TC1100002895.mm.2	Top3a	-0.655	0.0521421	0.00120012	TRUE	DOWN
TC0800002497.mm.2	Arhgap10	-0.6125	0.0521421	0.00120223	TRUE	DOWN
TC0900001902.mm.2	1810064F22Rik	-1.9275	0.0526752	0.00122218	TRUE	DOWN
TC0800001608.mm.2	Insr	-0.6	0.0526752	0.00122706	TRUE	DOWN
TC1300001471.mm.2	Tbce	-1.1675	0.0530218	0.001244	TRUE	DOWN
TC0200001843.mm.2	Sord	-0.705	0.0546057	0.00129266	TRUE	DOWN
TC1800000884.mm.2	Zadh2	-0.8975	0.0546057	0.0012959	TRUE	DOWN
TC1300001654.mm.2	Lrrc16a	-1.4075	0.0546885	0.00130281	TRUE	DOWN
TC0200001663.mm.2	Nop10	-0.71	0.0548838	0.00130994	TRUE	DOWN
TC1100000975.mm.2	Mis12	-1.3525	0.0550133	0.00132046	TRUE	DOWN
TC0400002238.mm.2	Necab1	-1.0025	0.05508	0.00132702	TRUE	DOWN
TC1100000939.mm.2	Asgr1	-1.0575	0.0554387	0.00133816	TRUE	DOWN
TC1700002637.mm.2	Haao	-0.9025	0.0558238	0.00136002	TRUE	DOWN
TC0700004509.mm.2	Sirt3	-1.515	0.0560955	0.00137935	TRUE	DOWN
TC0800002596.mm.2	Rnaseh2a	-1.08	0.0567799	0.00141009	TRUE	DOWN
TC0800001200.mm.2	Ces3a	-0.8375	0.0571043	0.00142461	TRUE	DOWN
TC1800001122.mm.2	Proc	-1.095	0.0573412	0.00143966	TRUE	DOWN
TC1900000763.mm.2	Pdcd4	-0.92	0.0573412	0.00144748	TRUE	DOWN
TC1300000633.mm.2	Higd2a	-0.6775	0.0573412	0.00145094	TRUE	DOWN
TC1400002406.mm.2	Lrch1	-0.62	0.0573412	0.00145501	TRUE	DOWN
TC1000001577.mm.2	Sdr9c7	-2.54	0.0573412	0.00145618	TRUE	DOWN
TC0500003516.mm.2	Gna12	-1.3425	0.0573412	0.00145761	TRUE	DOWN
TC0500002760.mm.2	Scarb2	-0.8225	0.0573412	0.00145814	TRUE	DOWN
TC1000000713.mm.2	Upb1	-2.41	0.0573412	0.00145846	TRUE	DOWN
TC0400004014.mm.2	Fbxo6	-1.4025	0.0573663	0.00146962	TRUE	DOWN
TC1000002374.mm.2	Gucd1	-0.98	0.0576297	0.00148578	TRUE	DOWN
TC1000002035.mm.2	AI317395	-1.6875	0.0580057	0.00150199	TRUE	DOWN
TC0100002950.mm.2	Epb41l5	-0.825	0.0580881	0.00150912	TRUE	DOWN
TC0300001482.mm.2	Ddah1	-6.1425	0.0581125	0.001517	TRUE	DOWN
TC1500001807.mm.2	Apol7a	-2.6575	0.0584986	0.00153583	TRUE	DOWN
TC0900001297.mm.2	Slco2a1	-2.1475	0.0590393	0.00155269	TRUE	DOWN
TC1100000771.mm.2	Map2k3	-1.2425	0.0590882	0.0015645	TRUE	DOWN
TC0600003367.mm.2	Gm6614	-1.2575	0.0591095	0.00156784	TRUE	DOWN
TC0400001743.mm.2	Akr7a5	-1.405	0.0592774	0.00157763	TRUE	DOWN
TC1000002658.mm.2	Slc17a8	-1.665	0.0593552	0.00158238	TRUE	DOWN
TC0900001921.mm.2	Dpy19l1	-1.805	0.0602364	0.0016096	TRUE	DOWN
TC0200002666.mm.2	Fam210b	-0.7925	0.0616362	0.00165707	TRUE	DOWN
TC0200004241.mm.2	Hipk3; Mir1902	-1.0125	0.0618631	0.00167663	TRUE	DOWN
TC0100001607.mm.2	Dcaf8	-0.8325	0.0618631	0.00168046	TRUE	DOWN
TC0100000039.mm.2	Adhfe1	-1.365	0.0618631	0.00168251	TRUE	DOWN
TC1300000016.mm.2	Akr1c14	-1.385	0.0618631	0.00168284	TRUE	DOWN
TC0800002706.mm.2	Ces1g	-1.8925	0.0618631	0.00168545	TRUE	DOWN
TC1800000788.mm.2	Mbd1	-1.28	0.0621192	0.00170082	TRUE	DOWN
TC0200000060.mm.2	Usp6nl	-1.2475	0.0625256	0.00171758	TRUE	DOWN
TC1300002777.mm.2	Zfp825	-0.73	0.0628138	0.00173116	TRUE	DOWN
TC1900001172.mm.2	Olfr1446	-0.7375	0.0628443	0.00173483	TRUE	DOWN
TC1000002508.mm.2	Btbd2	-0.6825	0.0629744	0.0017516	TRUE	DOWN
TC0900002292.mm.2	Fdx1	-1.0625	0.0629744	0.00175917	TRUE	DOWN
TC1400000301.mm.2	Chdh	-2.7075	0.0629744	0.00176599	TRUE	DOWN
TC1300002176.mm.2	Fbp1	-1.5075	0.0629744	0.00176625	TRUE	DOWN
TC0900003293.mm.2	Zfp445	-2.035	0.0630306	0.00177119	TRUE	DOWN
TC0X00000323.mm.2	Pgrmc1	-0.69	0.0640538	0.00181085	TRUE	DOWN
TC0800000538.mm.2	Acsl1	-1.5625	0.0640538	0.00181188	TRUE	DOWN
TC1100004107.mm.2	Acox1	-0.9575	0.0640538	0.00181437	TRUE	DOWN
TC0100001871.mm.2	Lamb3	-1.0775	0.0653994	0.00186932	TRUE	DOWN
TC0700002879.mm.2	Plekhf1	-0.945	0.0668222	0.00193491	TRUE	DOWN
TC0200000450.mm.2	Pmpca	-0.9625	0.0668242	0.00193798	TRUE	DOWN
TC0500002592.mm.2	Ociad2	-2.54	0.0669928	0.00194638	TRUE	DOWN
TC0900000833.mm.2	Parp16	-1.08	0.0669928	0.00195192	TRUE	DOWN
TC1500000417.mm.2	D15Ertd621e	-0.6	0.0675437	0.00197437	TRUE	DOWN
TC0900001874.mm.2	Tmed1	-0.5825	0.0675437	0.00198318	TRUE	DOWN
TC0300002558.mm.2	Hsd3b2	-4.395	0.0679549	0.00200298	TRUE	DOWN
TC1400002098.mm.2	Tgm1	-1.4575	0.0679549	0.00200659	TRUE	DOWN
TC1400001047.mm.2	Esd	-0.9025	0.0679549	0.00201061	TRUE	DOWN
TC1700001618.mm.2	Amdhd2	-0.94	0.0679549	0.00201948	TRUE	DOWN
TC0900003002.mm.2	Glyctk	-0.92	0.0680217	0.00202478	TRUE	DOWN
TC0200003362.mm.2	Stom	-1.0275	0.0680834	0.00202969	TRUE	DOWN
TC0500001302.mm.2	Fbxo21	-1.63	0.0681168	0.00203989	TRUE	DOWN
TC1900000567.mm.2	Cyp2c37	-1.2425	0.0684222	0.00205211	TRUE	DOWN
TC1900000669.mm.2	Btrc	-0.895	0.0686467	0.00206812	TRUE	DOWN
TC1000002900.mm.2	Tmem19	-1.9525	0.0688651	0.00208227	TRUE	DOWN
TC0X00003301.mm.2	Reps2	-0.7175	0.0688651	0.00208534	TRUE	DOWN
TC0600001082.mm.2	Hdac11	-1.3075	0.0688651	0.00209903	TRUE	DOWN
TC1500001430.mm.2	Dpys	-1.49	0.0688651	0.00209986	TRUE	DOWN
TC0600002607.mm.2	Sfxn5	-1.3525	0.0688651	0.00210261	TRUE	DOWN
TC1000002320.mm.2	Arid5b	-2.6425	0.0692136	0.0021413	TRUE	DOWN
TC1200000751.mm.2	Smoc1	-0.9325	0.0695253	0.00216034	TRUE	DOWN
TC1800000852.mm.2	Pqlc1	-2.3625	0.0696041	0.00216906	TRUE	DOWN
TC1400001306.mm.2	Rap2a	-2.1825	0.0696729	0.00217627	TRUE	DOWN
TC0700004474.mm.2	Bnip3	-1.4825	0.0697662	0.00218353	TRUE	DOWN
TC1500000240.mm.2	Pop1	-0.6575	0.0698933	0.00219114	TRUE	DOWN
TC1400000942.mm.2	Clu	-0.6125	0.0698933	0.0022001	TRUE	DOWN
TC0500003489.mm.2	Cox19	-1.53	0.0704498	0.00222079	TRUE	DOWN
TC1100002030.mm.2	Slc25a10	-1.4025	0.0706286	0.00222961	TRUE	DOWN
TC0900001695.mm.2	Gria4	-0.6025	0.071052	0.00225257	TRUE	DOWN
TC1900000897.mm.2	Gstp2	-2.2275	0.0711401	0.00226498	TRUE	DOWN
TC0100003679.mm.2	Ephx1	-1.1525	0.0711431	0.00226934	TRUE	DOWN
TC0200002885.mm.2	Dhtkd1	-1.4725	0.0711431	0.00227148	TRUE	DOWN
TC0100003825.mm.2	Gm3934	-2.8625	0.0715319	0.00228711	TRUE	DOWN
TC1300001033.mm.2	Dhfr	-1.07	0.0721866	0.00231632	TRUE	DOWN
TC0200003951.mm.2	Olfr1084	-1.3275	0.0733985	0.00237985	TRUE	DOWN
TC0600001591.mm.2	Crebl2	-1.3425	0.0735174	0.0023961	TRUE	DOWN
TC1100003296.mm.2	Slc13a2	-0.855	0.0737527	0.00240794	TRUE	DOWN
TC0300002297.mm.2	Apoa1bp	-0.5925	0.0747021	0.00244566	TRUE	DOWN
TC0600003365.mm.2	Slco1a1	-5.49	0.0748373	0.00245346	TRUE	DOWN
TC1600002181.mm.2	Dgcr2	-0.715	0.074975	0.00247209	TRUE	DOWN
TC0900001647.mm.2	Zkscan7	-1.2175	0.074975	0.00247382	TRUE	DOWN
TC1100003999.mm.2	Abca8a	-4.7825	0.0756937	0.00252508	TRUE	DOWN
TC0200003162.mm.2	Rabl6	-0.855	0.0756937	0.00252549	TRUE	DOWN
TC0700003823.mm.2	Plekhb1	-2.0875	0.0756937	0.00252585	TRUE	DOWN
TC0900003119.mm.2	Tmie	-0.985	0.0760326	0.00254358	TRUE	DOWN
TC0600000711.mm.2	Abcg2	-2.945	0.076043	0.00254783	TRUE	DOWN
TC0600001672.mm.2	Slco1b2	-1.6675	0.076043	0.0025512	TRUE	DOWN
TC0500001210.mm.2	Iscu	-1.0725	0.0763454	0.00256823	TRUE	DOWN
TC1000000386.mm.2	Sec63	-0.67	0.0763822	0.00258569	TRUE	DOWN
TC1200001544.mm.2	Id2	-1.0175	0.0763822	0.00258731	TRUE	DOWN
TC1100002225.mm.2	Ddc	-2.135	0.0763822	0.0025911	TRUE	DOWN
TC1300001882.mm.2	Ranbp9	-0.8625	0.0768854	0.00262102	TRUE	DOWN
TC0100001788.mm.2	Slc30a10	-1.1775	0.0769008	0.00263123	TRUE	DOWN
TC0900001349.mm.2	Pcbp4	-1.315	0.0769008	0.00264924	TRUE	DOWN
TC0100000386.mm.2	Ormdl1	-1.0975	0.0777564	0.00268923	TRUE	DOWN
TC1100003997.mm.2	Abca8b	-1.715	0.0777963	0.00269411	TRUE	DOWN
TC1200001874.mm.2	L2hgdh	-1.36	0.077827	0.0026993	TRUE	DOWN
TC1800001366.mm.2	Aldh7a1	-1.065	0.0778681	0.00271896	TRUE	DOWN
TC1400001438.mm.2	Acox2	-0.88	0.0778681	0.0027235	TRUE	DOWN
TC0900001348.mm.2	Abhd14b	-1.025	0.0778681	0.00272465	TRUE	DOWN
TC1100001164.mm.2	Poldip2	-0.9275	0.0780346	0.00273945	TRUE	DOWN
TC0600002966.mm.2	Tmcc1	-1.4175	0.0780346	0.00274102	TRUE	DOWN
TC1400001687.mm.2	Ankrd28	-0.645	0.0782113	0.00275427	TRUE	DOWN
TC1900000249.mm.2	Gm4952	-1.7375	0.078599	0.00278347	TRUE	DOWN
TC1700001465.mm.2	Unc93a; Gm9992	-0.9625	0.0786309	0.00280236	TRUE	DOWN
TC0800000120.mm.2	Cul4a	-1.18	0.0786309	0.0028094	TRUE	DOWN
TC1500002181.mm.2	Adcy6	-1.6725	0.0786309	0.0028128	TRUE	DOWN
TC1100003814.mm.2	Etv4	-0.6	0.0786309	0.00281353	TRUE	DOWN
TC0700002714.mm.2	Fam98c	-0.67	0.0788366	0.00282599	TRUE	DOWN
TC0200003204.mm.2	Surf1	-0.775	0.0789654	0.00283416	TRUE	DOWN
TC0800002744.mm.2	Cfap20	-1.3875	0.0793853	0.00286217	TRUE	DOWN
TC0600000821.mm.2	Fabp1	-0.59	0.0793853	0.00286619	TRUE	DOWN
TC0500000048.mm.2	Slc25a40	-0.92	0.0793853	0.00287089	TRUE	DOWN
TC0300000747.mm.2	Pklr	-3.44	0.0793853	0.00287571	TRUE	DOWN
TC0100002831.mm.2	Mterf4	-1.0825	0.0796447	0.00290517	TRUE	DOWN
TC0100002488.mm.2	Kansl1l	-1.3775	0.079757	0.00291645	TRUE	DOWN
TC1300002326.mm.2	Cast	-0.795	0.0803044	0.00294008	TRUE	DOWN
TC1600000218.mm.2	Aifm3	-1.5125	0.0803914	0.00294727	TRUE	DOWN
TC0100000778.mm.2	2810459M11Rik	-1.0225	0.0803914	0.00296153	TRUE	DOWN
TC0900002719.mm.2	Gsta2	-2.675	0.0803914	0.00296209	TRUE	DOWN
TC1000002436.mm.2	Lrrc3	-1.2975	0.0803914	0.00296499	TRUE	DOWN
TC1500002053.mm.2	Odf3b	-2.3075	0.080574	0.00297535	TRUE	DOWN
TC1100000537.mm.2	3010026O09Rik	-1.085	0.080849	0.00299279	TRUE	DOWN
TC0800001481.mm.2	Zfpm1	-1.265	0.0810306	0.00300507	TRUE	DOWN
TC0400001305.mm.2	Hyi	-1.255	0.0810306	0.00301046	TRUE	DOWN
TC0X00000209.mm.2	Rgn	-0.7825	0.0811538	0.00301869	TRUE	DOWN
TC0600001843.mm.2	Col28a1	-0.5975	0.0813591	0.00303375	TRUE	DOWN
TC0300000180.mm.2	Slc2a2	-1.4	0.0813623	0.00305542	TRUE	DOWN
TC1100001771.mm.2	Taco1	-0.7175	0.0815835	0.00308243	TRUE	DOWN
TC0800002594.mm.2	Gcdh	-1.3	0.0819272	0.0031028	TRUE	DOWN
TC0300002611.mm.2	Slc22a15	-0.7275	0.0823087	0.00312407	TRUE	DOWN
TC0500001389.mm.2	Vps29	-0.645	0.0823087	0.00313052	TRUE	DOWN
TC0200003401.mm.2	Strbp	-0.7475	0.0823087	0.00314098	TRUE	DOWN
TC0800003162.mm.2	Nup133	-0.81	0.0823087	0.00314261	TRUE	DOWN
TC0800002008.mm.2	Ubxn8	-0.945	0.0823087	0.00315193	TRUE	DOWN
TC1400002231.mm.2	Msra	-0.6	0.0823087	0.00316173	TRUE	DOWN
TC1600001303.mm.2	Slc25a1	-0.62	0.0826139	0.00318417	TRUE	DOWN
TC0100000794.mm.2	Dis3l2	-0.725	0.0826139	0.00318959	TRUE	DOWN
TC1900001481.mm.2	Cyp2c54	-3.6	0.0826139	0.00319464	TRUE	DOWN
TC1500000034.mm.2	C9	-2.2575	0.0826139	0.00319577	TRUE	DOWN
TC1100000605.mm.2	Shroom1	-1.4625	0.0828145	0.00321099	TRUE	DOWN
TC1100002451.mm.2	Chac2	-1.545	0.0831006	0.00322952	TRUE	DOWN
TC0200003805.mm.2	Prkra	-0.8575	0.0836386	0.00327176	TRUE	DOWN
TC1300000594.mm.2	Spin1	-0.825	0.0836386	0.00327556	TRUE	DOWN
TC1800001429.mm.2	Grpel2	-0.98	0.0836386	0.00328061	TRUE	DOWN
TC0700001709.mm.2	Acsm5	-1.27	0.0846422	0.00333522	TRUE	DOWN
TC0600001373.mm.2	Mug1	-0.6775	0.0848673	0.00334791	TRUE	DOWN
TC1700001857.mm.2	Cyp4f13	-0.64	0.0857583	0.00340237	TRUE	DOWN
TC1500000606.mm.2	Mfsd3	-1.095	0.0860271	0.00341691	TRUE	DOWN
TC0100001207.mm.2	Etnk2	-1.1425	0.0864101	0.00344357	TRUE	DOWN
TC1100003505.mm.2	Akap1	-1.055	0.0864101	0.00344379	TRUE	DOWN
TC0800002314.mm.2	Klhl2	-0.7775	0.0864932	0.00345567	TRUE	DOWN
TC1700001451.mm.2	Igf2r	-0.77	0.0864932	0.00345879	TRUE	DOWN
TC0100002349.mm.2	Pgap1	-1.5775	0.0865321	0.00346814	TRUE	DOWN
TC0800001917.mm.2	Ddhd2	-1.1475	0.0867117	0.00348315	TRUE	DOWN
TC1100003538.mm.2	Tom1l1	-0.71	0.0868059	0.00349084	TRUE	DOWN
TC1000003090.mm.2	Xrcc6bp1	-0.865	0.0869828	0.00350188	TRUE	DOWN
TC0X00003313.mm.2	Syap1	-0.65	0.0871636	0.00351308	TRUE	DOWN
TC0200002537.mm.2	Ctsa	-0.925	0.0872861	0.00352588	TRUE	DOWN
TC0700003831.mm.2	P2ry2	-1.4525	0.087466	0.00353708	TRUE	DOWN
TC0200002869.mm.2	Mcm10	-3.6275	0.0874957	0.00354223	TRUE	DOWN
TC1600000168.mm.2	Mpv17l	-1.1475	0.0887394	0.00359657	TRUE	DOWN
TC0100000315.mm.2	Mrps9	-0.955	0.0901483	0.00366585	TRUE	DOWN
TC0200002749.mm.2	Gm14403	-1.3225	0.0901523	0.00367251	TRUE	DOWN
TC0700004176.mm.2	Gde1	-1.035	0.0904275	0.00369757	TRUE	DOWN
TC1000001298.mm.2	Nap1l1	-0.9225	0.0907514	0.0037149	TRUE	DOWN
TC1800000153.mm.2	Dsg1a	-1.1275	0.0907957	0.0037208	TRUE	DOWN
TC0100001008.mm.2	2310035C23Rik	-0.595	0.0909095	0.00373048	TRUE	DOWN
TC0500000740.mm.2	Polr2b	-0.855	0.0910981	0.0037537	TRUE	DOWN
TC0200001362.mm.2	Celf1	-0.74	0.0912013	0.00376617	TRUE	DOWN
TC1800000105.mm.2	Ttc39c	-2.135	0.0917668	0.00381432	TRUE	DOWN
TC0400002729.mm.2	D630039A03Rik	-1.7475	0.0917669	0.00382313	TRUE	DOWN
TC1400002090.mm.2	Emc9	-1.775	0.0917669	0.00382672	TRUE	DOWN
TC0400002776.mm.2	Mup-ps19; Mup20	-4.1575	0.0920993	0.00384473	TRUE	DOWN
TC0700000693.mm.2	1600014C10Rik	-1.6825	0.0921918	0.00386104	TRUE	DOWN
TC0500002695.mm.2	Ugt2a3	-0.9775	0.092472	0.00387694	TRUE	DOWN
TC1100002567.mm.2	Pttg1	-1.04	0.0928895	0.00390718	TRUE	DOWN
TC0X00002847.mm.2	2610002M06Rik	-0.675	0.0928895	0.00390758	TRUE	DOWN
TC1900000212.mm.2	Prpf19	-0.7725	0.0928895	0.00391149	TRUE	DOWN
TC0300002559.mm.2	Hsd3b3	-4.02	0.0930853	0.00392781	TRUE	DOWN
TC1900001729.mm.2	Shtn1	-0.955	0.0930949	0.00393456	TRUE	DOWN
TC1700001847.mm.2	Zfp871	-0.92	0.0931957	0.00394506	TRUE	DOWN
TC0X00000363.mm.2	Zbtb33	-1.1525	0.0936555	0.00397265	TRUE	DOWN
TC0700003608.mm.2	Cpeb1	-0.8175	0.0936976	0.00398907	TRUE	DOWN
TC1800001521.mm.2	Fam210a; Mir7219	-0.71	0.0942683	0.00403291	TRUE	DOWN
TC0700000458.mm.2	Blvrb	-2.01	0.0954723	0.00411022	TRUE	DOWN
TC1700002656.mm.2	Lrpprc	-0.675	0.0955117	0.00413457	TRUE	DOWN
TC0200000490.mm.2	Tsc1	-0.8125	0.0955117	0.00414232	TRUE	DOWN
TC1100003418.mm.2	Dhrs11	-1.0125	0.0955117	0.00414437	TRUE	DOWN
TC0600003048.mm.2	Bid	-1.1825	0.0960379	0.00418107	TRUE	DOWN
TC0200005462.mm.2	Entpd2	-1.1175	0.0960379	0.00418214	TRUE	DOWN
TC0900001519.mm.2	Cmtm6	-0.8	0.0961976	0.00419987	TRUE	DOWN
TC0700000831.mm.2	Pih1d1	-0.7575	0.0961976	0.00420209	TRUE	DOWN
TC0600000381.mm.2	Luc7l2	-0.76	0.0962509	0.0042107	TRUE	DOWN
TC0300000521.mm.2	Kcnab1	-0.6925	0.0970149	0.00426401	TRUE	DOWN
TC0500000877.mm.2	Stbd1	-0.805	0.0976233	0.00433471	TRUE	DOWN
TC0100002600.mm.2	Cnppd1	-1.295	0.0979519	0.00437742	TRUE	DOWN
TC1400002266.mm.2	Ephx2	-1.625	0.0979519	0.00438721	TRUE	DOWN
TC0200001030.mm.2	Dcaf17	-0.6725	0.0979519	0.00438786	TRUE	DOWN
TC0200001218.mm.2	Med19	-0.6975	0.0979519	0.00439801	TRUE	DOWN
TC0500002486.mm.2	Ugdh	-1.1125	0.0979519	0.00440624	TRUE	DOWN
TC1900000898.mm.2	BC021614	-1.075	0.0983991	0.00443442	TRUE	DOWN
TC0400004190.mm.2	Tesk2	-0.6125	0.0983991	0.00444101	TRUE	DOWN
TC0900001048.mm.2	Gsta4	-1.38	0.0983991	0.00444449	TRUE	DOWN
TC1200000287.mm.2	Atxn7l1	-1.235	0.0984608	0.00445171	TRUE	DOWN
TC0X00001700.mm.2	Arhgap6	-0.8675	0.0993623	0.00452826	TRUE	DOWN
TC0400003590.mm.2	Rbbp4	-1.265	0.0994134	0.00454301	TRUE	DOWN
TC0500000344.mm.2	Yes1	-0.8825	0.0994134	0.00454723	TRUE	DOWN

## Sheet: Sheet 4
ID	Gene.Symbol	Fold Change	p value (FDR)	p value	Significance	Status
TC1900001057.mm.2	Slc22a27	8.745	0.000439886	9.90466e-08	TRUE	UP
TC1300001377.mm.2	Akr1c18	11.4675	0.00186134	9.22034e-07	TRUE	UP
TC0500003745.mm.2	Cyp3a41a	7.8575	0.00260143	1.4058e-06	TRUE	UP
TC0X00003399.mm.2	Sh3bgrl	1.265	0.00351257	2.08138e-06	TRUE	UP
TC0900001900.mm.2	Acp5	1.815	0.00351257	2.5309e-06	TRUE	UP
TC0500003596.mm.2	Cyp3a16	11.4025	0.00354394	2.7131e-06	TRUE	UP
TC0500003202.mm.2	Cux2	3.7275	0.00430128	4.84248e-06	TRUE	UP
TC1800001175.mm.2	Slc23a1	2.3975	0.00520405	6.56189e-06	TRUE	UP
TC1700002573.mm.2	Atl2	1.5675	0.00538124	7.50877e-06	TRUE	UP
TC0900001128.mm.2	Nt5e	4.7975	0.00596321	9.13038e-06	TRUE	UP
TC1000001701.mm.2	Ginm1	1.51	0.00679098	1.10094e-05	TRUE	UP
TC0400001229.mm.2	Cyp4a31	4.3	0.00957411	1.94017e-05	TRUE	UP
TC1500001002.mm.2	Tuba1c	1.1775	0.00980343	2.03079e-05	TRUE	UP
TC1700002175.mm.2	Slc22a7	5.835	0.0101385	2.39497e-05	TRUE	UP
TC0400002151.mm.2	Cyp7a1	1.735	0.0113772	2.81792e-05	TRUE	UP
TC0200003630.mm.2	Ifih1	1.905	0.0118588	2.99059e-05	TRUE	UP
TC1500002075.mm.2	Abcd2	3.4225	0.0129309	3.4939e-05	TRUE	UP
TC0100003505.mm.2	Hsd17b7	2.585	0.0131363	3.61634e-05	TRUE	UP
TC0200005184.mm.2	Ptgis	2.0475	0.0131363	3.78062e-05	TRUE	UP
TC1700001194.mm.2	Qpct	2.11	0.0131363	3.84338e-05	TRUE	UP
TC1900000317.mm.2	Rfk	1.865	0.0131363	3.90432e-05	TRUE	UP
TC0500001775.mm.2	Cyp3a59	1.77	0.0140741	4.30983e-05	TRUE	UP
TC1900000987.mm.2	Frmd8	2.605	0.0145107	4.7049e-05	TRUE	UP
TC1700000836.mm.2	Cyp39a1	2.7575	0.0150346	5.11468e-05	TRUE	UP
TC1000003140.mm.2	Coq10a	1.815	0.0150346	5.27481e-05	TRUE	UP
TC1400002215.mm.2	Fdft1	2.4825	0.0150346	5.28098e-05	TRUE	UP
TC1100003787.mm.2	Stat5b	0.885	0.0152586	5.56079e-05	TRUE	UP
TC0200002295.mm.2	H13	1.13	0.0152586	5.56584e-05	TRUE	UP
TC0500000547.mm.2	Stim2	3	0.0153854	5.76919e-05	TRUE	UP
TC1500001736.mm.2	9030619P08Rik	8.335	0.01564	5.98666e-05	TRUE	UP
TC0500002919.mm.2	Tgfbr3	1.5225	0.0157243	6.08974e-05	TRUE	UP
TC1400001906.mm.2	Ddhd1; Mir5131	2.1	0.0158616	6.27789e-05	TRUE	UP
TC0X00000668.mm.2	Nsdhl	2.375	0.0158616	6.28579e-05	TRUE	UP
TC1600000564.mm.2	Igsf11	1.8175	0.0159251	6.38264e-05	TRUE	UP
TC0100002544.mm.2	Fn1	0.9225	0.0171514	6.95138e-05	TRUE	UP
TC1600001553.mm.2	Dirc2	1.315	0.0175786	7.36202e-05	TRUE	UP
TC1900001612.mm.2	Cyp17a1	10.3175	0.0182958	7.85437e-05	TRUE	UP
TC0800000845.mm.2	Hmox1	2.1925	0.0182958	7.99193e-05	TRUE	UP
TC0100002392.mm.2	Trak2	1.63	0.018324	8.08679e-05	TRUE	UP
TC1300001812.mm.2	Nrn1	1.565	0.018585	8.36937e-05	TRUE	UP
TC0300001446.mm.2	Gbp3	4.3625	0.0188833	8.67253e-05	TRUE	UP
TC1700000335.mm.2	Abca3	2.6175	0.0189018	8.76738e-05	TRUE	UP
TC0300002718.mm.2	Csf1	1.81	0.0195944	9.34771e-05	TRUE	UP
TC1400002054.mm.2	Slc7a7	1.905	0.0195944	9.52986e-05	TRUE	UP
TC1200000200.mm.2	Grhl1	1.1	0.0201895	9.91021e-05	TRUE	UP
TC0400003383.mm.2	St3gal3	0.76	0.0218067	0.000110143	TRUE	UP
TC1300000718.mm.2	Ntrk2	4.9575	0.0218067	0.00011195	TRUE	UP
TC1900001490.mm.2	Aldh18a1	1.005	0.0225741	0.000116906	TRUE	UP
TC1300000278.mm.2	BC005537	0.6825	0.0233885	0.000122959	TRUE	UP
TC1900001123.mm.2	AW112010	1.815	0.0233885	0.000124284	TRUE	UP
TC0500003744.mm.2	Cyp3a41b	4.2175	0.0236892	0.000127153	TRUE	UP
TC0500002699.mm.2	Sult1d1	2.2175	0.0236892	0.000128015	TRUE	UP
TC0900000659.mm.2	Idh3a	2.11	0.0252086	0.000141244	TRUE	UP
TC1400001487.mm.2	Rarb	2.65	0.0252086	0.000141902	TRUE	UP
TC1100002829.mm.2	2210407C18Rik	4.5	0.026809	0.000153735	TRUE	UP
TC0600000362.mm.2	Trim24	3.385	0.0281981	0.000167619	TRUE	UP
TC0100003697.mm.2	Lbr	1.6575	0.0288963	0.000173071	TRUE	UP
TC0700002102.mm.2	Dhcr7	2.3375	0.0290049	0.000175221	TRUE	UP
TC0900001232.mm.2	Rbp1	3.4075	0.031092	0.000194622	TRUE	UP
TC0200003165.mm.2	Fcna	2.01	0.0313927	0.000199332	TRUE	UP
TC1900000455.mm.2	Mbl2	1.375	0.0315843	0.000203528	TRUE	UP
TC0700000168.mm.2	Sult2a5	2.7775	0.0315843	0.00020449	TRUE	UP
TC0100000706.mm.2	Col4a3	4.07	0.0315843	0.000207068	TRUE	UP
TC1100003640.mm.2	Kpnb1	0.9175	0.0315843	0.00020766	TRUE	UP
TC1500001728.mm.2	Ly6a	4.4375	0.0326504	0.000222022	TRUE	UP
TC1300000045.mm.2	Idi1	2.5225	0.0327126	0.000226864	TRUE	UP
TC1100001895.mm.2	Slc16a5	1.6375	0.0344979	0.000249168	TRUE	UP
TC1000000812.mm.2	Bsg	0.9225	0.0344979	0.00025213	TRUE	UP
TC0700004610.mm.2	Ccnd1; Mir3962	3.9375	0.0348854	0.000259213	TRUE	UP
TC0400001530.mm.2	Ptp4a2	0.9775	0.0357422	0.000267733	TRUE	UP
TC0500003599.mm.2	Cyp3a44	3.79	0.0357422	0.000272971	TRUE	UP
TC1100003300.mm.2	Tmem97	1.34	0.0357422	0.000274287	TRUE	UP
TC0200002594.mm.2	Cebpb	2.005	0.0359236	0.000278252	TRUE	UP
TC1000000170.mm.2	Gm5420	1.915	0.0359698	0.000280539	TRUE	UP
TC0900001200.mm.2	Pcolce2	2.75	0.0359698	0.000284671	TRUE	UP
TC0500002694.mm.2	Ugt2b37	4.495	0.0359698	0.000286057	TRUE	UP
TC1600000489.mm.2	Hacd2	1.215	0.0359698	0.000286709	TRUE	UP
TC0700003845.mm.2	Folr2	2.6875	0.0368119	0.000295679	TRUE	UP
TC0500001894.mm.2	Cyp51	2.58	0.0368119	0.000296737	TRUE	UP
TC0700001409.mm.2	Ucp2	3.64	0.0370682	0.000302361	TRUE	UP
TC1900000467.mm.2	Papss2	2.5575	0.0370682	0.00030381	TRUE	UP
TC0100002305.mm.2	Nabp1	0.89	0.0376447	0.000317012	TRUE	UP
TC0900002529.mm.2	Aph1b	1.195	0.0379633	0.000321404	TRUE	UP
TC1500000742.mm.2	Srebf2	1.37	0.038439	0.000328893	TRUE	UP
TC0400002634.mm.2	Acnat1	2.9875	0.0389767	0.00033705	TRUE	UP
TC1700000470.mm.2	Anks1	3.025	0.0389767	0.000340459	TRUE	UP
TC1200001237.mm.2	Tnfaip2	1.2925	0.0389767	0.000347863	TRUE	UP
TC0X00000122.mm.2	Sytl5	3.44	0.0389767	0.000348609	TRUE	UP
TC0400000377.mm.2	Dnaic1	4.715	0.0389767	0.000351434	TRUE	UP
TC0200002362.mm.2	Dynlrb1	1.235	0.0389767	0.000356342	TRUE	UP
TC0300001641.mm.2	Fabp12	3.1825	0.039128	0.00036122	TRUE	UP
TC0200003151.mm.2	Ptgds	2.0925	0.0393801	0.000367094	TRUE	UP
TC1800000249.mm.2	Lims2	1.6275	0.0397475	0.000372309	TRUE	UP
TC1800001437.mm.2	Adrb2	2.2575	0.039782	0.000377037	TRUE	UP
TC0800002617.mm.2	Dnaja2	0.755	0.039782	0.000380562	TRUE	UP
TC1600001639.mm.2	Gramd1c	1.71	0.039782	0.000381589	TRUE	UP
TC0400003675.mm.2	Atpif1	1.5625	0.0418343	0.000410694	TRUE	UP
TC1200002524.mm.2	Serpina3f	1.3975	0.0426789	0.000424752	TRUE	UP
TC0100000334.mm.2	Ercc5	1.03	0.0431061	0.000430944	TRUE	UP
TC0200005123.mm.2	Wfdc16	3.305	0.043455	0.000438741	TRUE	UP
TC1900001722.mm.2	Gfra1	0.9875	0.0445961	0.000465983	TRUE	UP
TC0100002969.mm.2	Insig2	2.36	0.0445961	0.000466875	TRUE	UP
TC0300001445.mm.2	Gbp7	1.6125	0.0445961	0.000467264	TRUE	UP
TC1500001608.mm.2	A1bg	2.95	0.0445961	0.000467932	TRUE	UP
TC1300001353.mm.2	Hmgcs1	3.785	0.0446111	0.00047082	TRUE	UP
TC0500000734.mm.2	Srp72	0.7275	0.0446111	0.000474116	TRUE	UP
TC0600003329.mm.2	Plbd1	1.64	0.0448011	0.000478152	TRUE	UP
TC0800003091.mm.2	Sult5a1	4.14	0.0455817	0.000490189	TRUE	UP
TC1700002308.mm.2	Stap2	1.015	0.0455817	0.00049369	TRUE	UP
TC0400000446.mm.2	Npr2	1.545	0.0466245	0.00051651	TRUE	UP
TC0300000693.mm.2	Cd5l	3.51	0.0467705	0.000530627	TRUE	UP
TC0600001368.mm.2	Tuba8	1.5525	0.0483515	0.000557416	TRUE	UP
TC1100000923.mm.2	Zbtb4	1.24	0.0488168	0.000567929	TRUE	UP
TC0400001107.mm.2	Dhcr24	1.3075	0.0488168	0.000569375	TRUE	UP
TC0900002779.mm.2	Pgm3	2.44	0.0489845	0.000577226	TRUE	UP
TC0700003517.mm.2	Slco3a1	1.43	0.0489845	0.000577949	TRUE	UP
TC1700002655.mm.2	Abcg5	2.4675	0.0495806	0.000587215	TRUE	UP
TC0500003532.mm.2	Mmd2	6.12	0.0497231	0.000591142	TRUE	UP
TC1100002015.mm.2	Baiap2	1.5075	0.0507278	0.000605371	TRUE	UP
TC0100003233.mm.2	Pla2g4a	1.4175	0.0509009	0.000609729	TRUE	UP
TC0200001354.mm.2	Fnbp4	1.0375	0.0528601	0.000635578	TRUE	UP
TC1700001846.mm.2	Pglyrp2	0.8525	0.0540746	0.000655394	TRUE	UP
TC1900001484.mm.2	Pdlim1	1.7775	0.0546504	0.000672231	TRUE	UP
TC0800002313.mm.2	Msmo1	2.285	0.055465	0.000693798	TRUE	UP
TC0500002320.mm.2	Prom1	3.43	0.0557092	0.00069994	TRUE	UP
TC1100002649.mm.2	Tgtp2	2.715	0.0568136	0.000716392	TRUE	UP
TC1900000502.mm.2	Ifit3b	2.545	0.0572711	0.000729881	TRUE	UP
TC0500001225.mm.2	Mvk	2.1475	0.0581854	0.000746773	TRUE	UP
TC0900002510.mm.2	Slc51b	3.1225	0.0590233	0.000765328	TRUE	UP
TC0400002474.mm.2	Enho	1.39	0.0590233	0.000774894	TRUE	UP
TC0600002578.mm.2	Clec4f	3.13	0.0590233	0.000776133	TRUE	UP
TC1100003399.mm.2	Ccl6	3.0825	0.0593257	0.000782781	TRUE	UP
TC0100003124.mm.2	Rnpep	1.23	0.0637737	0.00085583	TRUE	UP
TC0200001681.mm.2	Fmn1	1.485	0.0647525	0.000874797	TRUE	UP
TC1700000513.mm.2	Zfand3	0.705	0.0657352	0.000894598	TRUE	UP
TC0X00002676.mm.2	Vsig4	2.355	0.0657352	0.000900375	TRUE	UP
TC0900002321.mm.2	Cib2	1.4225	0.0657352	0.000908796	TRUE	UP
TC0100001397.mm.2	Stx6	1.1125	0.0665256	0.000932289	TRUE	UP
TC1100002643.mm.2	Gm12185; Tgtp1	2.83	0.0665256	0.000938972	TRUE	UP
TC0800000659.mm.2	Ddx60	2.385	0.0665256	0.000944109	TRUE	UP
TC1900001767.mm.2	Slc22a29	3.24	0.0665256	0.000949483	TRUE	UP
TC0500002755.mm.2	Cxcl9	3.1575	0.0665256	0.000955673	TRUE	UP
TC1100003771.mm.2	Nt5c3b	1.105	0.0666641	0.000960664	TRUE	UP
TC0800001396.mm.2	Bco1	2.7875	0.0670105	0.000969574	TRUE	UP
TC1100001149.mm.2	Rab34	2.06	0.0670105	0.000978019	TRUE	UP
TC1200002506.mm.2	Dnah11	4.5425	0.0670105	0.000978762	TRUE	UP
TC1100000989.mm.2	Xaf1	1.8275	0.0670105	0.000981982	TRUE	UP
TC0X00001024.mm.2	Chic1	3.7025	0.067217	0.000999821	TRUE	UP
TC0700002964.mm.2	Emc10	1.12	0.067217	0.00100005	TRUE	UP
TC1300002079.mm.2	Cxcl14	2.43	0.067217	0.00100193	TRUE	UP
TC0400002633.mm.2	Acnat2	3.03	0.0677784	0.00101335	TRUE	UP
TC1800001402.mm.2	Synpo	1.4525	0.0693007	0.00104593	TRUE	UP
TC0800001255.mm.2	Cdh1	1.785	0.0693007	0.00104641	TRUE	UP
TC0500003395.mm.2	Hip1	1.175	0.0693007	0.00105839	TRUE	UP
TC0500000353.mm.2	Slc5a1	2.9475	0.0693007	0.00106051	TRUE	UP
TC1200000033.mm.2	Gm6682	1.3	0.0693007	0.0010656	TRUE	UP
TC0600002684.mm.2	Kbtbd12	1.3	0.0693007	0.00106876	TRUE	UP
TC1100002063.mm.2	Foxk2	0.895	0.0693007	0.00106969	TRUE	UP
TC0600001371.mm.2	Slc6a12	1.5225	0.0693007	0.00106997	TRUE	UP
TC1900001066.mm.2	Slc3a2	1.315	0.0697823	0.00108217	TRUE	UP
TC1200001663.mm.2	Ifrd1	2.775	0.0697823	0.0010873	TRUE	UP
TC1500001450.mm.2	Angpt1	3.175	0.0702328	0.00110006	TRUE	UP
TC1800000625.mm.2	Csf1r	2.2725	0.0704466	0.00111464	TRUE	UP
TC0700000236.mm.2	Slc1a5	2.2775	0.0708697	0.00113935	TRUE	UP
TC0100000792.mm.2	Cops7b	1.51	0.0710567	0.00114665	TRUE	UP
TC0500000054.mm.2	Abcb4	1.115	0.0710567	0.00115185	TRUE	UP
TC0900001777.mm.2	Ankrd49	0.7775	0.0710567	0.00115196	TRUE	UP
TC0X00002453.mm.2	G6pdx	1.5525	0.0710635	0.00115527	TRUE	UP
TC0300001137.mm.2	Sort1	1.5375	0.0723141	0.00118256	TRUE	UP
TC0400003219.mm.2	Dio1	3.155	0.0723141	0.00118537	TRUE	UP
TC1100003831.mm.2	Ubtf	0.6175	0.0725194	0.001192	TRUE	UP
TC0500002078.mm.2	Fastk	0.79	0.072797	0.00121295	TRUE	UP
TC0500000532.mm.2	Pi4k2b	1.475	0.0729697	0.00122569	TRUE	UP
TC1000002383.mm.2	Gstt1	2.6225	0.0732185	0.00123976	TRUE	UP
TC0400000127.mm.2	Tmem55a	0.5975	0.0732185	0.00124965	TRUE	UP
TC0900001195.mm.2	Paqr9	1.4125	0.0735004	0.00125791	TRUE	UP
TC0600003264.mm.2	Klra2	1.395	0.0735004	0.00126364	TRUE	UP
TC1000000030.mm.2	Esr1	2.025	0.0735004	0.0012644	TRUE	UP
TC0400000416.mm.2	Gm21955	0.8475	0.073631	0.00126996	TRUE	UP
TC1600002182.mm.2	Donson	1.105	0.0740048	0.00128307	TRUE	UP
TC0200004647.mm.2	Siglec1	2.0575	0.0740767	0.00128765	TRUE	UP
TC0400003792.mm.2	C1qb	2.9875	0.0747306	0.00130238	TRUE	UP
TC0100003264.mm.2	Rgl1	1.07	0.0761716	0.00133436	TRUE	UP
TC1700001522.mm.2	Fpr1	3.235	0.0768477	0.00134966	TRUE	UP
TC1600001557.mm.2	Dtx3l	0.9625	0.0773688	0.0013623	TRUE	UP
TC1200001974.mm.2	Tmem229b	1.795	0.077422	0.00136672	TRUE	UP
TC0400002434.mm.2	Ddx58	1.36	0.077593	0.00137646	TRUE	UP
TC1900001476.mm.2	Cyp2c38	2.2725	0.0778482	0.00139405	TRUE	UP
TC0X00003108.mm.2	Ammecr1	0.585	0.0778482	0.00139528	TRUE	UP
TC1500001606.mm.2	Fam84b	2.215	0.0781947	0.0014198	TRUE	UP
TC0200001368.mm.2	Spi1	2.865	0.0781947	0.00143101	TRUE	UP
TC0400002601.mm.2	Trim14	1.1	0.0781947	0.00143738	TRUE	UP
TC0900001726.mm.2	Cep126	6.855	0.0781947	0.00144035	TRUE	UP
TC1800001197.mm.2	Cd14	1.985	0.078522	0.00145333	TRUE	UP
TC0800001202.mm.2	Ces4a	6.4625	0.0815323	0.00151639	TRUE	UP
TC1500000432.mm.2	Sqle	2.3525	0.0818068	0.00152517	TRUE	UP
TC1000000744.mm.2	Lss	2.4275	0.0819837	0.00153955	TRUE	UP
TC1700001949.mm.2	Apom	0.905	0.0830836	0.00156394	TRUE	UP
TC1900001482.mm.2	Cyp2c70	1.105	0.0831982	0.00156985	TRUE	UP
TC1200002203.mm.2	Foxn3	1.1275	0.0835343	0.00158371	TRUE	UP
TC0900002676.mm.2	Mapk6	1.15	0.0841047	0.00161689	TRUE	UP
TC0500003465.mm.2	Pilrb2	1.8325	0.0841047	0.00162119	TRUE	UP
TC0900002532.mm.2	Aph1c	1.4475	0.0841047	0.00163499	TRUE	UP
TC0700000446.mm.2	Cyp2a12	1.2525	0.0842888	0.00165237	TRUE	UP
TC0900000560.mm.2	Apoa4	4.4975	0.0842888	0.00165552	TRUE	UP
TC0400003793.mm.2	C1qc	2.2575	0.0842888	0.00166173	TRUE	UP
TC1900000090.mm.2	Slc25a45	2.5175	0.0842888	0.00166255	TRUE	UP
TC1200001981.mm.2	Rdh11	2.275	0.0845198	0.00168143	TRUE	UP
TC1600001770.mm.2	St3gal6	1.58	0.0845198	0.00168476	TRUE	UP
TC0400002216.mm.2	Pdp1	3.05	0.0845198	0.0016849	TRUE	UP
TC0700004291.mm.2	Sult1a1	1.535	0.0845198	0.00168614	TRUE	UP
TC1200002081.mm.2	Npc2	0.6475	0.0854312	0.00171586	TRUE	UP
TC0500003028.mm.2	Sgsm1	1.915	0.0855057	0.0017212	TRUE	UP
TC0200000933.mm.2	Gca	2.115	0.0857826	0.0017345	TRUE	UP
TC0700001520.mm.2	Trim34b; Trim34a	1.3075	0.0867994	0.00177122	TRUE	UP
TC0100000847.mm.2	Spp2	1.8275	0.0867994	0.00177621	TRUE	UP
TC1300002474.mm.2	Hmgcr	1.835	0.0874918	0.00180452	TRUE	UP
TC0100003593.mm.2	AI607873	2.6575	0.0878689	0.00181905	TRUE	UP
TC1600001366.mm.2	2510009E07Rik	1.025	0.0878689	0.00182089	TRUE	UP
TC1100003569.mm.2	Eme1	0.62	0.088265	0.00184034	TRUE	UP
TC0800002503.mm.2	Tmem184c	1.085	0.0890522	0.00187259	TRUE	UP
TC0200001380.mm.2	Arhgap1	0.6725	0.0890522	0.0018838	TRUE	UP
TC1800001153.mm.2	Brd8	0.975	0.0890522	0.00188673	TRUE	UP
TC0400001555.mm.2	Sdc3	2.9875	0.0892417	0.00189955	TRUE	UP
TC1500002048.mm.2	Sbf1	0.7975	0.0892417	0.00190901	TRUE	UP
TC1100002641.mm.2	Irgm1	1.19	0.0892417	0.00190952	TRUE	UP
TC0700002623.mm.2	Pou2f2; Mir6537	0.8775	0.0892417	0.00191295	TRUE	UP
TC1500000045.mm.2	Lifr	1.4525	0.0909741	0.00196238	TRUE	UP
TC0500002745.mm.2	G3bp2	1.225	0.0914629	0.00197704	TRUE	UP
TC0700000285.mm.2	Dmpk	1.12	0.0918895	0.0019904	TRUE	UP
TC0500002756.mm.2	Cxcl10	2.31	0.0921972	0.00200249	TRUE	UP
TC1200002518.mm.2	Asap2	2.345	0.0921972	0.0020091	TRUE	UP
TC1900000441.mm.2	Cd274	1.4775	0.0921972	0.00200952	TRUE	UP
TC0600001532.mm.2	Clec12a	2.5725	0.093195	0.00203966	TRUE	UP
TC0500001992.mm.2	Cd36	1.8025	0.0939347	0.00206008	TRUE	UP
TC0X00000065.mm.2	Praf2	0.9975	0.0939743	0.00206518	TRUE	UP
TC1900000977.mm.2	Sipa1	0.81	0.0942634	0.00208852	TRUE	UP
TC1700000839.mm.2	Rcan2	2.7725	0.0948956	0.00210865	TRUE	UP
TC1100000681.mm.2	Gm12250	2.04	0.0953495	0.00212546	TRUE	UP
TC0600002114.mm.2	Parp12	1.39	0.0954538	0.00213209	TRUE	UP
TC0300001447.mm.2	Gbp2	2.415	0.0955462	0.00214243	TRUE	UP
TC0600002663.mm.2	Rab43	1.0175	0.0956187	0.00214889	TRUE	UP
TC0900001675.mm.2	Ccr5	0.8575	0.0956187	0.00216321	TRUE	UP
TC0500000997.mm.2	Arhgap24	1.555	0.0956187	0.00216563	TRUE	UP
TC0100002576.mm.2	Tns1	1.575	0.0956187	0.00216591	TRUE	UP
TC1100001209.mm.2	Tmem98	1.65	0.0958575	0.00218685	TRUE	UP
TC0500002068.mm.2	Fam126a	1.825	0.0958575	0.00219687	TRUE	UP
TC0100003891.mm.2	Ifi203	2.03	0.0958575	0.00219722	TRUE	UP
TC0300000306.mm.2	Slc25a31	1.2725	0.0972136	0.00224582	TRUE	UP
TC0400003577.mm.2	Tlr12	0.9675	0.0977419	0.00227122	TRUE	UP
TC0500003463.mm.2	Pilra	2.04	0.0983892	0.00229513	TRUE	UP
TC1200000203.mm.2	Rrm2	2.505	0.0985415	0.00231199	TRUE	UP
TC0200002308.mm.2	Hck	2.2075	0.0987318	0.00232446	TRUE	UP
TC0700000041.mm.2	Suv420h2	1.16	0.0991579	0.00238451	TRUE	UP
TC0800001511.mm.2	Dpep1	1.23	0.0991802	0.00239397	TRUE	UP
TC1500000760.mm.2	Cyp2d12	-3.0025	0.000439886	7.0542e-08	TRUE	DOWN
TC0400001223.mm.2	Cyp4a12b	-10.34	0.000439886	8.21203e-08	TRUE	DOWN
TC0400001221.mm.2	Cyp4a12a	-12.135	0.000646131	1.74583e-07	TRUE	DOWN
TC0400003101.mm.2	Cyp2j5	-2.815	0.00186134	9.07277e-07	TRUE	DOWN
TC0100000427.mm.2	Aox1	-3.3525	0.00351257	2.4443e-06	TRUE	DOWN
TC1100003999.mm.2	Abca8a	-4.785	0.00430128	3.97087e-06	TRUE	DOWN
TC0300001413.mm.2	Adh6-ps1	-5.3475	0.00430128	4.07758e-06	TRUE	DOWN
TC1600001602.mm.2	Nr1i2	-0.915	0.00430128	4.2509e-06	TRUE	DOWN
TC1800001017.mm.2	Aqp4	-1.3525	0.00430128	4.32e-06	TRUE	DOWN
TC0300002957.mm.2	Cyp2u1	-4.995	0.00538124	7.34624e-06	TRUE	DOWN
TC0800001883.mm.2	Gpat4	-1.585	0.00538124	7.75465e-06	TRUE	DOWN
TC0600003345.mm.2	Slc15a5	-3.7475	0.00617414	9.73137e-06	TRUE	DOWN
TC0500002692.mm.2	Ugt2b36	-1.3175	0.006937	1.15586e-05	TRUE	DOWN
TC1600000376.mm.2	Il1rap	-3.2775	0.00715558	1.2245e-05	TRUE	DOWN
TC0700001252.mm.2	Nox4	-5.98	0.00726014	1.27509e-05	TRUE	DOWN
TC0500000791.mm.2	Ugt2b35	-1.7425	0.00819852	1.5667e-05	TRUE	DOWN
TC0500002592.mm.2	Ociad2	-2.6625	0.00819852	1.58757e-05	TRUE	DOWN
TC1500001944.mm.2	Cyp2d22	-2.1425	0.00957411	1.92194e-05	TRUE	DOWN
TC1500002328.mm.2	Agxt2	-2.17	0.00980803	2.07591e-05	TRUE	DOWN
TC1800000103.mm.2	Lama3	-3.085	0.00983314	2.12551e-05	TRUE	DOWN
TC0600003600.mm.2	Cml5	-4.8025	0.0101385	2.30466e-05	TRUE	DOWN
TC1500000757.mm.2	Cyp2d9	-6.8175	0.0101385	2.39853e-05	TRUE	DOWN
TC1500000072.mm.2	Ugt3a1	-4.97	0.0101385	2.41981e-05	TRUE	DOWN
TC0300001322.mm.2	Etnppl	-6.42	0.0113772	2.80658e-05	TRUE	DOWN
TC0300001667.mm.2	Car1	-4.8	0.012487	3.20526e-05	TRUE	DOWN
TC1000003114.mm.2	Inhbe	-2.9875	0.0125232	3.32734e-05	TRUE	DOWN
TC0700004409.mm.2	Oat	-4.045	0.0131363	3.89508e-05	TRUE	DOWN
TC1900000254.mm.2	Keg1	-6.075	0.0140757	4.42231e-05	TRUE	DOWN
TC0400001743.mm.2	Akr7a5	-1.5775	0.0145107	4.65561e-05	TRUE	DOWN
TC0600001672.mm.2	Slco1b2	-1.6675	0.0150346	5.01041e-05	TRUE	DOWN
TC1900001477.mm.2	Cyp2c67	-4.02	0.0150346	5.04618e-05	TRUE	DOWN
TC0600001296.mm.2	44263	-1.4475	0.0150346	5.25642e-05	TRUE	DOWN
TC0400002174.mm.2	Car8	-2.36	0.0152214	5.41515e-05	TRUE	DOWN
TC0300002277.mm.2	Cd1d1	-1.91	0.0153854	5.79605e-05	TRUE	DOWN
TC0900003293.mm.2	Zfp445	-2.04	0.0173539	7.18977e-05	TRUE	DOWN
TC0300001414.mm.2	Adh4	-3.8125	0.0182958	7.91303e-05	TRUE	DOWN
TC1200002077.mm.2	Entpd5	-1.81	0.0182958	7.96856e-05	TRUE	DOWN
TC1700000567.mm.2	Cyp4f15	-1.36	0.0188833	8.67376e-05	TRUE	DOWN
TC0100003825.mm.2	Gm3934	-3.495	0.0190774	8.93475e-05	TRUE	DOWN
TC1900000565.mm.2	Cyp2c29; Cyp2c53-ps	-2.5	0.0195944	9.42348e-05	TRUE	DOWN
TC0400003234.mm.2	Scp2	-3.56	0.0195944	9.48026e-05	TRUE	DOWN
TC0500000740.mm.2	Polr2b	-0.995	0.0217514	0.000107748	TRUE	DOWN
TC1000000713.mm.2	Upb1	-2.2175	0.0218067	0.000111496	TRUE	DOWN
TC0600002620.mm.2	Nat8	-1.95	0.0218067	0.000111717	TRUE	DOWN
TC0X00001501.mm.2	Alas2	-3.48	0.0233885	0.000123519	TRUE	DOWN
TC0900001038.mm.2	Gclc	-1.5525	0.0244516	0.000133236	TRUE	DOWN
TC1500001807.mm.2	Apol7a	-3.0325	0.0250948	0.00013796	TRUE	DOWN
TC0400002606.mm.2	Gabbr2	-2.71	0.0250948	0.000139001	TRUE	DOWN
TC1700001805.mm.2	Glo1	-1.99	0.0257718	0.000146233	TRUE	DOWN
TC0400001087.mm.2	C8b	-2.2475	0.026809	0.000156585	TRUE	DOWN
TC0500002693.mm.2	Ugt2b5	-1.9525	0.0290049	0.000176334	TRUE	DOWN
TC0300001494.mm.2	Uox	-2.5	0.0295808	0.000181167	TRUE	DOWN
TC1300001378.mm.2	Akr1c12	-1.8725	0.0298033	0.000184157	TRUE	DOWN
TC0X00003361.mm.2	Prps2	-0.75	0.0298033	0.000185214	TRUE	DOWN
TC1300002176.mm.2	Fbp1	-1.32	0.0311486	0.000196379	TRUE	DOWN
TC0900001921.mm.2	Dpy19l1	-1.8125	0.0315843	0.000205244	TRUE	DOWN
TC1500001430.mm.2	Dpys	-1.7275	0.0317315	0.000210058	TRUE	DOWN
TC0300000095.mm.2	Car3	-6.81	0.0322182	0.000215652	TRUE	DOWN
TC0100001533.mm.2	Ildr2	-1.5625	0.0322182	0.000217013	TRUE	DOWN
TC0200002869.mm.2	Mcm10	-3.8775	0.0327126	0.000226233	TRUE	DOWN
TC0400001387.mm.2	Trit1	-1.0025	0.034001	0.00023733	TRUE	DOWN
TC0400003590.mm.2	Rbbp4	-1.1975	0.0344883	0.000245505	TRUE	DOWN
TC0700004176.mm.2	Gde1	-0.98	0.0344883	0.000246944	TRUE	DOWN
TC1400001980.mm.2	Olfr733	-0.9925	0.0344979	0.000251761	TRUE	DOWN
TC1300000019.mm.2	Akr1c13	-1.9175	0.0344979	0.000253227	TRUE	DOWN
TC0400003184.mm.2	C8a	-3.9425	0.0348854	0.000258344	TRUE	DOWN
TC1600001316.mm.2	Comt	-1.0325	0.0357422	0.00027284	TRUE	DOWN
TC0500002882.mm.2	Hsd17b11	-1.8775	0.0357422	0.000275237	TRUE	DOWN
TC1300000020.mm.2	Akr1c19	-2.6525	0.0359698	0.000283472	TRUE	DOWN
TC0400000278.mm.2	Gabrr2	-0.75	0.0372194	0.000307835	TRUE	DOWN
TC0300000180.mm.2	Slc2a2	-1.0525	0.0372194	0.000309585	TRUE	DOWN
TC1700000832.mm.2	Adgrf1	-4.1475	0.0372194	0.000310078	TRUE	DOWN
TC1900000249.mm.2	Gm4952	-3.35	0.0373163	0.000312566	TRUE	DOWN
TC0600003598.mm.2	Cml3	-2.3675	0.0389767	0.000341294	TRUE	DOWN
TC0400003097.mm.2	Cyp2j6	-1.3	0.0389767	0.000343675	TRUE	DOWN
TC1100002451.mm.2	Chac2	-1.1875	0.0389767	0.000348122	TRUE	DOWN
TC0300000967.mm.2	Fmo5	-1.3575	0.0389767	0.000351892	TRUE	DOWN
TC1700001621.mm.2	1600002H07Rik	-2.195	0.0389767	0.000353599	TRUE	DOWN
TC0600003109.mm.2	C1s2	-1.1075	0.0389767	0.000355036	TRUE	DOWN
TC1000001895.mm.2	Enpp3	-2.61	0.0389767	0.000358067	TRUE	DOWN
TC0400001034.mm.2	Ak4	-1.685	0.0393801	0.000366072	TRUE	DOWN
TC0600003365.mm.2	Slco1a1	-5.5425	0.039782	0.000376145	TRUE	DOWN
TC0500003489.mm.2	Cox19	-1.355	0.039782	0.000379899	TRUE	DOWN
TC0800001296.mm.2	Pmfbp1	-0.7825	0.0414624	0.000401417	TRUE	DOWN
TC0700001922.mm.2	Acadsb	-1.3675	0.0414624	0.000401441	TRUE	DOWN
TC0600002351.mm.2	Ppm1k	-2.015	0.0415485	0.000404146	TRUE	DOWN
TC0100003186.mm.2	Cfhr1	-1.695	0.0416677	0.000407182	TRUE	DOWN
TC0900002292.mm.2	Fdx1	-0.9075	0.0418484	0.000412717	TRUE	DOWN
TC0700004321.mm.2	Sephs2	-1.0675	0.0431669	0.000433496	TRUE	DOWN
TC0100003190.mm.2	Gm4788	-1.0225	0.043455	0.000440304	TRUE	DOWN
TC0100003725.mm.2	Mia3	-0.7725	0.0435635	0.000443365	TRUE	DOWN
TC0300001221.mm.2	Dpyd	-1.7425	0.0443281	0.000454289	TRUE	DOWN
TC1200002049.mm.2	Zfyve1	-0.8575	0.0443281	0.000455138	TRUE	DOWN
TC0X00000323.mm.2	Pgrmc1	-0.7125	0.04436	0.000457463	TRUE	DOWN
TC0200003946.mm.2	Olfr1079	-0.96	0.0446111	0.000473805	TRUE	DOWN
TC0500000488.mm.2	Lap3	-1.6475	0.0455817	0.000493976	TRUE	DOWN
TC0400004058.mm.2	H6pd	-1.18	0.0455817	0.000494694	TRUE	DOWN
TC1500002056.mm.2	Arsa	-1.925	0.0456095	0.000497051	TRUE	DOWN
TC1400000944.mm.2	Chrna2	-1.195	0.0462342	0.00050762	TRUE	DOWN
TC0900001049.mm.2	Gm3776; Gsta1	-2.82	0.0462342	0.000508023	TRUE	DOWN
TC0800002744.mm.2	Cfap20	-1.3325	0.0463762	0.000511671	TRUE	DOWN
TC0500000836.mm.2	Afm	-1.435	0.0467705	0.000529248	TRUE	DOWN
TC0700000693.mm.2	1600014C10Rik	-1.3175	0.0467705	0.000529591	TRUE	DOWN
TC0400002136.mm.2	Sdr16c5	-0.86	0.0467705	0.000530483	TRUE	DOWN
TC1900001445.mm.2	Ppp1r3c	-7.29	0.0467705	0.000530535	TRUE	DOWN
TC1500001531.mm.2	Enpp2	-2.9975	0.0467705	0.000530765	TRUE	DOWN
TC1500001946.mm.2	Cyp2d10	-1.18	0.0470424	0.000535969	TRUE	DOWN
TC1700001822.mm.2	Cbs	-0.805	0.0473108	0.000541158	TRUE	DOWN
TC1000002900.mm.2	Tmem19	-1.4025	0.0476847	0.000547581	TRUE	DOWN
TC0600001375.mm.2	Gm10319	-1.69	0.0489845	0.00057764	TRUE	DOWN
TC0400004070.mm.2	Park7	-1.075	0.0534197	0.000644712	TRUE	DOWN
TC1000001133.mm.2	Hal	-1.26	0.0540746	0.00065795	TRUE	DOWN
TC0400001010.mm.2	Pgm2	-0.96	0.0540746	0.000660901	TRUE	DOWN
TC0400004196.mm.2	Aldh4a1	-1.075	0.0540746	0.000662357	TRUE	DOWN
TC0300002558.mm.2	Hsd3b2	-3.9025	0.0548657	0.00067946	TRUE	DOWN
TC0700004509.mm.2	Sirt3	-0.9275	0.0551936	0.000686005	TRUE	DOWN
TC1300002445.mm.2	Scamp1	-1.7725	0.055465	0.000694374	TRUE	DOWN
TC1900000896.mm.2	Gstp1	-2.785	0.0568136	0.000718933	TRUE	DOWN
TC1900000250.mm.2	Glyat	-1.5025	0.0571999	0.000726397	TRUE	DOWN
TC0800000394.mm.2	Gsr	-0.9575	0.0576731	0.0007376	TRUE	DOWN
TC0400001141.mm.2	Echdc2	-1.43	0.0590233	0.000766404	TRUE	DOWN
TC0100003739.mm.2	44257	-1.325	0.0590233	0.000768398	TRUE	DOWN
TC0500001302.mm.2	Fbxo21	-1.8275	0.0590233	0.00076941	TRUE	DOWN
TC0600002176.mm.2	Tcaf3	-0.7625	0.0590233	0.000773412	TRUE	DOWN
TC1700000842.mm.2	Enpp5	-1.3075	0.0604944	0.000802236	TRUE	DOWN
TC0500001590.mm.2	Hspb1	-2.28	0.0604944	0.000806374	TRUE	DOWN
TC0800002706.mm.2	Ces1g	-2.7775	0.062459	0.000835374	TRUE	DOWN
TC1500001953.mm.2	Cyp2d13	-2.6525	0.0637961	0.000859004	TRUE	DOWN
TC0200001843.mm.2	Sord	-0.815	0.0657352	0.000903118	TRUE	DOWN
TC0600001515.mm.2	Clec2h	-2.595	0.0657352	0.000904645	TRUE	DOWN
TC0600001421.mm.2	C1rl	-1.2275	0.0657352	0.000908376	TRUE	DOWN
TC1500001136.mm.2	Ghr	-1.425	0.0665256	0.000924727	TRUE	DOWN
TC1400000301.mm.2	Chdh	-1.99	0.0665256	0.000928547	TRUE	DOWN
TC0900001789.mm.2	Ccdc67	-0.885	0.0665256	0.000940867	TRUE	DOWN
TC1100002030.mm.2	Slc25a10	-1.2725	0.0665256	0.000942677	TRUE	DOWN
TC0500001165.mm.2	Mn1	-1.2925	0.0665256	0.000950269	TRUE	DOWN
TC0800000120.mm.2	Cul4a	-0.935	0.0665256	0.000951892	TRUE	DOWN
TC0500001455.mm.2	Fam101a	-0.655	0.0665256	0.000954018	TRUE	DOWN
TC1400002266.mm.2	Ephx2	-2.0675	0.0670105	0.000987309	TRUE	DOWN
TC0100000428.mm.2	Aox3	-1.8575	0.0693007	0.00105833	TRUE	DOWN
TC1700001209.mm.2	Galm	-1.1475	0.0697823	0.00108675	TRUE	DOWN
TC0900003002.mm.2	Glyctk	-0.965	0.0702328	0.00110065	TRUE	DOWN
TC0500002760.mm.2	Scarb2	-0.6575	0.0704466	0.00110842	TRUE	DOWN
TC1100004107.mm.2	Acox1	-1.8975	0.0704466	0.00111147	TRUE	DOWN
TC1300001794.mm.2	Eci2	-0.91	0.0704466	0.00111923	TRUE	DOWN
TC0600003428.mm.2	Bhlhe41	-1.8825	0.0704466	0.00111986	TRUE	DOWN
TC0300002218.mm.2	Tdo2	-2.0875	0.070589	0.0011253	TRUE	DOWN
TC1500000599.mm.2	Adck5	-1.4975	0.0707	0.00113068	TRUE	DOWN
TC1700001618.mm.2	Amdhd2	-0.69	0.0723141	0.00118484	TRUE	DOWN
TC0100001526.mm.2	Creg1	-0.8975	0.0727762	0.00120165	TRUE	DOWN
TC1900000897.mm.2	Gstp2	-2.7925	0.0727762	0.00120769	TRUE	DOWN
TC0600002966.mm.2	Tmcc1	-1.2675	0.0727762	0.00120933	TRUE	DOWN
TC1200000798.mm.2	Acot1	-2.8525	0.0731677	0.00123231	TRUE	DOWN
TC1100000940.mm.2	Asgr2	-1.6575	0.0732185	0.00124418	TRUE	DOWN
TC0100003374.mm.2	Prdx6	-1.015	0.0732185	0.00124436	TRUE	DOWN
TC0400003344.mm.2	Akr1a1	-0.76	0.0732185	0.00124689	TRUE	DOWN
TC1600001548.mm.2	Pdia5	-0.91	0.073799	0.00127618	TRUE	DOWN
TC0700001460.mm.2	Olfr550	-0.94	0.0757415	0.00132341	TRUE	DOWN
TC0600001422.mm.2	C1ra	-0.885	0.077593	0.00137673	TRUE	DOWN
TC1900001550.mm.2	Cyp2c44	-6.0275	0.0778482	0.00139262	TRUE	DOWN
TC0200005091.mm.2	Fitm2	-1.1825	0.0781947	0.00140982	TRUE	DOWN
TC1000002943.mm.2	Slc35e3	-1.4525	0.0781947	0.00141077	TRUE	DOWN
TC0300003173.mm.2	Acadm	-1.4625	0.0781947	0.00141731	TRUE	DOWN
TC0200000361.mm.2	Acbd5	-0.655	0.0781947	0.00141754	TRUE	DOWN
TC0500003516.mm.2	Gna12	-0.7325	0.0781947	0.00142879	TRUE	DOWN
TC0100001550.mm.2	Aldh9a1	-1.01	0.0781947	0.00144375	TRUE	DOWN
TC0800002950.mm.2	Ldhd	-2.0425	0.0796074	0.001477	TRUE	DOWN
TC0200002830.mm.2	Prpf6	-1.035	0.0818853	0.001531	TRUE	DOWN
TC1100003561.mm.2	Abcc3	-4.4575	0.0818853	0.00153401	TRUE	DOWN
TC1900001059.mm.2	Slc22a28	-1.7875	0.083863	0.00159372	TRUE	DOWN
TC0700001729.mm.2	E130201H02Rik	-0.685	0.0841047	0.0016105	TRUE	DOWN
TC0400002454.mm.2	Bag1	-0.8625	0.0841047	0.00161341	TRUE	DOWN
TC0800002704.mm.2	Ces1e	-2.7325	0.0841047	0.0016312	TRUE	DOWN
TC1300000463.mm.2	Tmem14c	-0.7525	0.0841047	0.0016335	TRUE	DOWN
TC1500001320.mm.2	Ankrd33b	-0.9825	0.0841047	0.00163619	TRUE	DOWN
TC1900001768.mm.2	Slc22a30	-0.885	0.0842888	0.00165262	TRUE	DOWN
TC0100003738.mm.2	44256	-0.7725	0.0842888	0.00166134	TRUE	DOWN
TC1400001306.mm.2	Rap2a	-1.14	0.0845198	0.00167357	TRUE	DOWN
TC0300001365.mm.2	Bdh2	-2.265	0.0847523	0.0016984	TRUE	DOWN
TC0900002452.mm.2	Paqr5	-0.5925	0.0862083	0.00174699	TRUE	DOWN
TC0900001048.mm.2	Gsta4	-1.4325	0.0867994	0.00177276	TRUE	DOWN
TC0900001050.mm.2	Gm10639	-2.1075	0.0873576	0.00179782	TRUE	DOWN
TC0300000880.mm.2	Selenbp1	-1.83	0.0878689	0.00182417	TRUE	DOWN
TSUnmapped00000008.mm.2	44256	-0.925	0.0880535	0.00183197	TRUE	DOWN
TC1500001920.mm.2	St13	-0.9	0.0885468	0.00185021	TRUE	DOWN
TC0300002559.mm.2	Hsd3b3	-3.0175	0.0890522	0.00187405	TRUE	DOWN
TC1800000468.mm.2	Kcnn2	-0.97	0.0890522	0.00187561	TRUE	DOWN
TC0100003893.mm.2	Ahctf1	-0.6375	0.0890522	0.00187968	TRUE	DOWN
TC1400002310.mm.2	Slc25a37	-1.3475	0.0890522	0.00188884	TRUE	DOWN
TC1500001945.mm.2	Cyp2d11; Mir7684	-2.975	0.0896186	0.00192507	TRUE	DOWN
TC1000000595.mm.2	Pbld2	-1.7625	0.0909741	0.00196072	TRUE	DOWN
TC1500002053.mm.2	Odf3b	-2.2425	0.092231	0.00201441	TRUE	DOWN
TC0200001840.mm.2	4933406J08Rik	-0.94	0.0942634	0.00207586	TRUE	DOWN
TC0600001374.mm.2	Mug2	-2.1525	0.0942634	0.00208437	TRUE	DOWN
TC0X00003146.mm.2	Lrch2	-0.9725	0.0948956	0.00211107	TRUE	DOWN
TC1300002011.mm.2	Auh	-1.2075	0.0955462	0.00214275	TRUE	DOWN
TC0100002308.mm.2	Myo1b	-1.195	0.0956187	0.00215732	TRUE	DOWN
TC0100001165.mm.2	Pigr	-0.975	0.0957034	0.00217214	TRUE	DOWN
TC1300000383.mm.2	Nqo2	-0.9925	0.0964587	0.00221867	TRUE	DOWN
TC0300002686.mm.2	Chil6	-0.77	0.0964587	0.00222348	TRUE	DOWN
TC0600002385.mm.2	Gprin3	-1.595	0.0964587	0.00222403	TRUE	DOWN
TC1900001481.mm.2	Cyp2c54	-4.1175	0.0975771	0.00225861	TRUE	DOWN
TC0400002295.mm.2	Pou3f2	-0.7	0.0982254	0.00228688	TRUE	DOWN
TC0900003092.mm.2	Fbxw25	-0.7575	0.0985415	0.00231121	TRUE	DOWN
TC0200004690.mm.2	Hao1	-2.3125	0.0988895	0.00233725	TRUE	DOWN
TC1900000660.mm.2	Sema4g	-0.8	0.0988895	0.00234322	TRUE	DOWN
TC0900001348.mm.2	Abhd14b	-1.265	0.0988895	0.00234688	TRUE	DOWN
TC1000002645.mm.2	Chpt1	-2.515	0.0990056	0.00235409	TRUE	DOWN
TC0500001432.mm.2	Hip1r	-1.1025	0.0990468	0.00235981	TRUE	DOWN
TC1400002108.mm.2	Cma1	-0.74	0.0990468	0.00236399	TRUE	DOWN
TC1000001506.mm.2	Avpr1a	-0.8675	0.0991579	0.00237729	TRUE	DOWN
TC0600000711.mm.2	Abcg2	-3.0075	0.0991579	0.00237735	TRUE	DOWN
TC1100004099.mm.2	Galk1	-1.1775	0.0991579	0.00238262	TRUE	DOWN
TC1800000665.mm.2	Nedd4l	-0.75	0.0991802	0.00239017	TRUE	DOWN

## Sheet: Sheet 5
														ID	Gene.Symbol	Fold Change	p value (FDR)	p value	Significance	Status
														TC1500001736.mm.2	9030619P08Rik	8.25	0.000532761	1.26491e-07	TRUE	UP
														TC0900000659.mm.2	Idh3a	2.8725	0.000532761	1.83901e-07	TRUE	UP
														TC0500002840.mm.2	Plac8	2.35	0.00230712	2.07793e-06	TRUE	UP
														TC1300001377.mm.2	Akr1c18	11.05	0.00259223	2.91839e-06	TRUE	UP
														TC1200000203.mm.2	Rrm2	1.8225	0.00324799	4.24173e-06	TRUE	UP
														TC0500002699.mm.2	Sult1d1	1.825	0.00530198	7.57056e-06	TRUE	UP
														TC0800001202.mm.2	Ces4a	7	0.00584118	9.40374e-06	TRUE	UP
														TC1300000045.mm.2	Idi1	3.1725	0.00656797	1.14763e-05	TRUE	UP
														TC0200000868.mm.2	Gpd2	2.9425	0.00656797	1.19965e-05	TRUE	UP
														TC0X00000668.mm.2	Nsdhl	2.9825	0.00656797	1.43622e-05	TRUE	UP
														TC0900002780.mm.2	Me1	3.2525	0.00656797	1.45184e-05	TRUE	UP
														TC0700001178.mm.2	Tm6sf1	1.95	0.00656797	1.46723e-05	TRUE	UP
														TC1700000836.mm.2	Cyp39a1	2.74	0.00663543	1.52394e-05	TRUE	UP
														TC1000001587.mm.2	Baz2a	1.275	0.00702793	1.70903e-05	TRUE	UP
														TC1900001425.mm.2	Slc16a12	1.0075	0.00745967	2.04918e-05	TRUE	UP
														TC0900001726.mm.2	Cep126	7.6525	0.0075962	2.1893e-05	TRUE	UP
														TC0800001127.mm.2	Adgrg3	2.715	0.00811421	2.37514e-05	TRUE	UP
														TC0700002102.mm.2	Dhcr7	2.2725	0.00859359	2.64809e-05	TRUE	UP
														TC1700002573.mm.2	Atl2	1.47	0.00859359	2.66377e-05	TRUE	UP
														TC0800000814.mm.2	Tpm4	1.15	0.00879376	2.87137e-05	TRUE	UP
														TC0200000933.mm.2	Gca	2.565	0.00879376	2.93046e-05	TRUE	UP
														TC1700002414.mm.2	Rab31	1.455	0.00879865	2.97171e-05	TRUE	UP
														TC1900001203.mm.2	Psat1	3.5225	0.00881358	3.04245e-05	TRUE	UP
														TC0500002694.mm.2	Ugt2b37	5.5775	0.00884003	3.21872e-05	TRUE	UP
														TC1500002199.mm.2	Tuba1b	1.265	0.00884003	3.22454e-05	TRUE	UP
														TC1900000090.mm.2	Slc25a45	2.7575	0.00899543	3.40764e-05	TRUE	UP
														TC1400001906.mm.2	Ddhd1; Mir5131	2.6525	0.00899543	3.42055e-05	TRUE	UP
														TC1700000470.mm.2	Anks1	2.34	0.0095252	3.86052e-05	TRUE	UP
														TC1300001353.mm.2	Hmgcs1	2.705	0.00964092	3.95084e-05	TRUE	UP
														TC1700001812.mm.2	Tff2	1.22	0.0107227	4.73216e-05	TRUE	UP
														TC0900000002.mm.2	Gm11168	1.73	0.0110712	5.02685e-05	TRUE	UP
														TC1400002002.mm.2	Rnase2a	2.4875	0.0110712	5.04208e-05	TRUE	UP
														TC0700003857.mm.2	Rhog	1.1075	0.0118223	5.51566e-05	TRUE	UP
														TC0400001107.mm.2	Dhcr24	1.365	0.0118223	5.5369e-05	TRUE	UP
														TC1800001175.mm.2	Slc23a1	2.6325	0.0120487	6.00494e-05	TRUE	UP
														TC0300001137.mm.2	Sort1	2.02	0.0120487	6.05189e-05	TRUE	UP
														TC0400001557.mm.2	Laptm5	1.805	0.0120487	6.23973e-05	TRUE	UP
														TC0700001409.mm.2	Ucp2	3.5025	0.0124174	6.50934e-05	TRUE	UP
														TC1500002247.mm.2	Bin2	1.8	0.0124174	6.54253e-05	TRUE	UP
														TC0900001200.mm.2	Pcolce2	2.18	0.0124643	6.67952e-05	TRUE	UP
														TC1900001612.mm.2	Cyp17a1	9.9975	0.0125347	6.89006e-05	TRUE	UP
														TC0100000847.mm.2	Spp2	2.04	0.0128594	7.35765e-05	TRUE	UP
														TC1000002383.mm.2	Gstt1	2.7975	0.0128594	7.63488e-05	TRUE	UP
														TC1700002224.mm.2	A530064D06Rik	1	0.0128594	7.6486e-05	TRUE	UP
														TC0900000560.mm.2	Apoa4	3.695	0.0129277	7.80107e-05	TRUE	UP
														TC0900000007.mm.2	Gm17535	1.9925	0.0134286	8.22433e-05	TRUE	UP
														TC0400001974.mm.2	Eno1; Eno1b	0.725	0.0136155	8.40011e-05	TRUE	UP
														TC0800002313.mm.2	Msmo1	2.3325	0.0140921	9.00723e-05	TRUE	UP
														TC1600001639.mm.2	Gramd1c	2.06	0.0140921	9.0114e-05	TRUE	UP
														TC1100002829.mm.2	2210407C18Rik	5.58	0.0141799	9.2202e-05	TRUE	UP
														TC0400001555.mm.2	Sdc3	2.7125	0.0148381	9.83529e-05	TRUE	UP
														TC0100002772.mm.2	A730008H23Rik; Hjurp; 6430706D22Rik	2.4675	0.0159921	0.000114507	TRUE	UP
														TC1400001451.mm.2	Gm3839	0.8325	0.0161813	0.000117467	TRUE	UP
														TC1700000335.mm.2	Abca3	2.4825	0.0163785	0.000120962	TRUE	UP
														TC0900002293.mm.2	Gm6981	0.6725	0.0164855	0.000122494	TRUE	UP
														TC0600002663.mm.2	Rab43	1.2125	0.0178074	0.000142149	TRUE	UP
														TC0700004610.mm.2	Ccnd1; Mir3962	2.5875	0.0179354	0.000146549	TRUE	UP
														TC1500000782.mm.2	Pnpla3	6.56	0.0179354	0.000147251	TRUE	UP
														TC1600002152.mm.2	Tmprss2	1.6525	0.0179354	0.000149246	TRUE	UP
														TC0800000845.mm.2	Hmox1	1.56	0.0186443	0.000159666	TRUE	UP
														TC1700002788.mm.2	H2-Q8; H2-Q6	1.455	0.0186443	0.000160365	TRUE	UP
														TC0300003077.mm.2	Sh3glb1	0.97	0.0187079	0.000161754	TRUE	UP
														TC0700000446.mm.2	Cyp2a12	1.39	0.0191761	0.00017012	TRUE	UP
														TC0100002544.mm.2	Fn1	1.1825	0.0197631	0.000177108	TRUE	UP
														TC0100000682.mm.2	Utp14b; Acsl3	2.395	0.0198539	0.000180254	TRUE	UP
														TC0800002553.mm.2	Tecr	0.85	0.0198539	0.000182392	TRUE	UP
														TC0900002778.mm.2	Gm17530	5.14	0.0200702	0.000185553	TRUE	UP
														TC0800001255.mm.2	Cdh1	1.3	0.0200702	0.000186186	TRUE	UP
														TC1200001237.mm.2	Tnfaip2	1.4475	0.020847	0.000195271	TRUE	UP
														TC1900001630.mm.2	Sh3pxd2a	1.6375	0.0208717	0.000196442	TRUE	UP
														TC0900000008.mm.2	Gm10715	2.7575	0.0209385	0.000198956	TRUE	UP
														TC0300000137.mm.2	Cp	1.0275	0.0211458	0.000203783	TRUE	UP
														TC1100001632.mm.2	Stat5a	1.3725	0.0218736	0.000214736	TRUE	UP
														TC1700000474.mm.2	Ppard; 1810013A23Rik	1.8625	0.0221032	0.000219977	TRUE	UP
														TC0200004196.mm.2	Gm10800	2.1575	0.0222575	0.000222745	TRUE	UP
														TC1200000033.mm.2	Gm6682	1.505	0.0223146	0.0002261	TRUE	UP
														TC1900000467.mm.2	Papss2	3.065	0.0223214	0.00022818	TRUE	UP
														TC1900001095.mm.2	Fads2	1.3575	0.0227589	0.00023767	TRUE	UP
														TC1400001514.mm.2	Gm21738	1.7925	0.0227589	0.000237838	TRUE	UP
														TC1000003226.mm.2	Gstt3	3.3875	0.0227589	0.000242483	TRUE	UP
														TC0700004565.mm.2	Ctsd; Ifitm10	0.6325	0.0227589	0.000242961	TRUE	UP
														TC0600000182.mm.2	Cped1	0.775	0.0227589	0.000244095	TRUE	UP
														TC0200001502.mm.2	Gm10801	1.9425	0.0228268	0.000247738	TRUE	UP
														TC0900002779.mm.2	Pgm3	2.8475	0.0231328	0.000257507	TRUE	UP
														TC0600000841.mm.2	St3gal5	1.855	0.0231328	0.000259537	TRUE	UP
														TC1500000549.mm.2	Ly6e	1.675	0.0231328	0.000260909	TRUE	UP
														TC1000001701.mm.2	Ginm1	2.2075	0.0231328	0.000261388	TRUE	UP
														TC1900000987.mm.2	Frmd8	2.345	0.0231328	0.000262389	TRUE	UP
														TC1400001436.mm.2	Pdhb	1.1425	0.023133	0.000264603	TRUE	UP
														TC0800002119.mm.2	Asah1	0.7225	0.0238172	0.000277333	TRUE	UP
														TC0600000609.mm.2	Snx10	1.8175	0.0238172	0.000277793	TRUE	UP
														TC1700001265.mm.2	Abcg8	2.175	0.0241825	0.000284231	TRUE	UP
														TC1100001111.mm.2	Slc6a4	0.935	0.0242511	0.00028613	TRUE	UP
														TC0500000536.mm.2	Slc34a2	5.0425	0.0242807	0.000289758	TRUE	UP
														TC1800001396.mm.2	Gm4841	1.285	0.0245175	0.000293688	TRUE	UP
														TC1400001039.mm.2	Gm21750	1.4	0.0256243	0.000316703	TRUE	UP
														TC1800000340.mm.2	Slc35a4	0.965	0.0260703	0.000327624	TRUE	UP
														TC0500002953.mm.2	Slc26a1	0.7225	0.0260703	0.000331818	TRUE	UP
														TC0300001306.mm.2	Elovl6	2.76	0.0262595	0.000338399	TRUE	UP
														TC1600002080.mm.2	Tmem50b	1.15	0.026739	0.000355142	TRUE	UP
														TC1300000718.mm.2	Ntrk2	4.0675	0.026739	0.000356424	TRUE	UP
														TC0200005123.mm.2	Wfdc16	3.015	0.0268387	0.000358961	TRUE	UP
														TC0500001572.mm.2	Abhd11	0.8	0.0270994	0.000363668	TRUE	UP
														TC1900000317.mm.2	Rfk	1.78	0.0276232	0.000376918	TRUE	UP
														TC1100004270.mm.2	Tlcd2	2.6975	0.0276383	0.000378845	TRUE	UP
														TC0100003591.mm.2	Pydc4	3.1975	0.0279449	0.000386341	TRUE	UP
														TC1900001342.mm.2	Plgrkt	0.9825	0.0279749	0.000388015	TRUE	UP
														TC1500001963.mm.2	Nfam1	1.5275	0.0281726	0.000392026	TRUE	UP
														TC1700002655.mm.2	Abcg5	2.975	0.028254	0.000394431	TRUE	UP
														TC1100000302.mm.2	Rtn4	1.5925	0.028373	0.00039737	TRUE	UP
														TC0100003593.mm.2	AI607873	2.12	0.0284981	0.000400406	TRUE	UP
														TC1500001728.mm.2	Ly6a	4.335	0.0286855	0.000404331	TRUE	UP
														TC0800001176.mm.2	Cdh5	1.115	0.0289297	0.000410379	TRUE	UP
														TC1100003779.mm.2	Dhx58	1.765	0.0289562	0.000414666	TRUE	UP
														TC0400000377.mm.2	Dnaic1	2.915	0.0294698	0.000427329	TRUE	UP
														TC1100003300.mm.2	Tmem97	1.625	0.0297239	0.000433519	TRUE	UP
														TC1000002420.mm.2	Adarb1	1.2525	0.0297239	0.000433691	TRUE	UP
														TC1600001966.mm.2	App	0.8425	0.0297261	0.000435062	TRUE	UP
														TC1100003374.mm.2	Nle1	0.61	0.0298187	0.000439562	TRUE	UP
														TC0500000170.mm.2	Gsap	1.7175	0.0298187	0.000440399	TRUE	UP
														TC0600001035.mm.2	Mgll	1.8375	0.0298187	0.000443233	TRUE	UP
														TC0100003505.mm.2	Hsd17b7	2.5925	0.0298187	0.000443686	TRUE	UP
														TC1300002083.mm.2	Lect2	1.0125	0.0298187	0.000447137	TRUE	UP
														TC1200000460.mm.2	Srp54b	0.8175	0.0298187	0.000447159	TRUE	UP
														TC1000000744.mm.2	Lss	2.44	0.0299805	0.000450936	TRUE	UP
														TC0300001607.mm.2	1700008P02Rik	1.0025	0.0302915	0.000457196	TRUE	UP
														TC1400001070.mm.2	Tsc22d1	2.33	0.0302915	0.000463566	TRUE	UP
														TC1900000709.mm.2	As3mt	1.1875	0.0302915	0.000463798	TRUE	UP
														TC1200000462.mm.2	Srp54c; Srp54b	0.9475	0.0303818	0.000467687	TRUE	UP
														TC1000002929.mm.2	Lyz2	2.24	0.0303818	0.000467917	TRUE	UP
														TC0500002651.mm.2	Igfbp7	1.3275	0.0303854	0.000469341	TRUE	UP
														TC1000002008.mm.2	Marcks	1.02	0.030387	0.000470734	TRUE	UP
														TC1300001006.mm.2	Hapln1	3.0525	0.0306076	0.000485237	TRUE	UP
														TC1900000221.mm.2	Ms4a6c	1.585	0.0306076	0.000487571	TRUE	UP
														TC1700000936.mm.2	B430306N03Rik	2.18	0.0306797	0.000493074	TRUE	UP
														TC0300002847.mm.2	Abcd3	0.835	0.0306797	0.000493694	TRUE	UP
														TC0100002383.mm.2	Orc2	0.6725	0.0306797	0.000495825	TRUE	UP
														TC0900001128.mm.2	Nt5e	4.2725	0.0307274	0.000498147	TRUE	UP
														TC0100000237.mm.2	Hs6st1	1.4225	0.031124	0.000508781	TRUE	UP
														TC1500000432.mm.2	Sqle	2.3175	0.0312441	0.000519346	TRUE	UP
														TC1700002175.mm.2	Slc22a7	6.755	0.0316006	0.000531738	TRUE	UP
														TC0800003091.mm.2	Sult5a1	3.355	0.0316006	0.000532226	TRUE	UP
														TC1700001522.mm.2	Fpr1	2.145	0.0324633	0.000554066	TRUE	UP
														TC1400001487.mm.2	Rarb	2.1	0.0325596	0.000557176	TRUE	UP
														TC0900001768.mm.2	Endod1	1.12	0.0327844	0.000563975	TRUE	UP
														TC0600003128.mm.2	Cops7a	0.65	0.0328539	0.00056665	TRUE	UP
														TC0700003850.mm.2	Il18bp	2.1475	0.0334968	0.000583773	TRUE	UP
														TC1100002233.mm.2	Cobl	1.025	0.0341057	0.000600193	TRUE	UP
														TC0100001634.mm.2	Pydc3	2.975	0.0341082	0.000603645	TRUE	UP
														TC1700000496.mm.2	Cdkn1a	2.5025	0.0342576	0.000607832	TRUE	UP
														TC1900001355.mm.2	Gldc	1.065	0.0346095	0.000615633	TRUE	UP
														TC0100003890.mm.2	Mndal	1.77	0.0348228	0.000620996	TRUE	UP
														TC0900001182.mm.2	Slc9a9	0.975	0.0348967	0.000625457	TRUE	UP
														TC1900001506.mm.2	Pik3ap1	1.1725	0.0352206	0.000634434	TRUE	UP
														TC1200001797.mm.2	Slc25a21	1.095	0.0357798	0.000648177	TRUE	UP
														TC1600001304.mm.2	Prodh	0.9625	0.0367756	0.000675936	TRUE	UP
														TC0700004515.mm.2	Ifitm3	1.33	0.0367756	0.00067735	TRUE	UP
														TC0600001371.mm.2	Slc6a12	2.04	0.0370818	0.000686329	TRUE	UP
														TC0900002676.mm.2	Mapk6	1.555	0.0372457	0.000692717	TRUE	UP
														TC1900001057.mm.2	Slc22a27	7.46	0.0373469	0.000704177	TRUE	UP
														TC0500003026.mm.2	Crybb3	0.8675	0.0373469	0.00070469	TRUE	UP
														TC0600001051.mm.2	Txnrd3	0.96	0.0379771	0.000726843	TRUE	UP
														TC0100003889.mm.2	Mnda	2.5725	0.0381489	0.000731849	TRUE	UP
														TC0900000004.mm.2	Gm10720	1.54	0.0382965	0.000739855	TRUE	UP
														TC0800003069.mm.2	Mvd	2.94	0.0384142	0.000743858	TRUE	UP
														TC0400001229.mm.2	Cyp4a31	4.135	0.0394312	0.000770654	TRUE	UP
														TC0200004651.mm.2	Rnf24	2.295	0.0396638	0.000778649	TRUE	UP
														TC1800000704.mm.2	Tubb6	2.01	0.040103	0.000804159	TRUE	UP
														TC1400002215.mm.2	Fdft1	1.89	0.040103	0.000804451	TRUE	UP
														TC0200004580.mm.2	Anapc1	0.58	0.040103	0.00080547	TRUE	UP
														TC0900002115.mm.2	Sc5d	0.8	0.040103	0.000812181	TRUE	UP
														TC0200003298.mm.2	Uck1	1.885	0.040103	0.000816291	TRUE	UP
														TC1200002434.mm.2	Akt1	1.39	0.0405021	0.000832082	TRUE	UP
														TC1400001930.mm.2	Gch1	1.96	0.0405021	0.000834458	TRUE	UP
														TC0300003106.mm.2	Prkacb	0.58	0.0405021	0.000841308	TRUE	UP
														TC1000000759.mm.2	Itgb2	2.0225	0.0405021	0.000844477	TRUE	UP
														TC0100002656.mm.2	Dock10	1.235	0.0414197	0.000869206	TRUE	UP
														TC1000001704.mm.2	Tab2	1.0075	0.0417601	0.000880894	TRUE	UP
														TC0500002756.mm.2	Cxcl10	2.7625	0.0417601	0.000883872	TRUE	UP
														TC0400003653.mm.2	Epb41	0.72	0.0423334	0.000897913	TRUE	UP
														TC0700000444.mm.2	Cyp2g1	1.6575	0.0424957	0.000904992	TRUE	UP
														TC1800000396.mm.2	Rnf14	0.8225	0.0424957	0.000914372	TRUE	UP
														TC0200005184.mm.2	Ptgis	1.4725	0.0424957	0.00091443	TRUE	UP
														TC0700002503.mm.2	Bcl3	2.7325	0.0424957	0.000916583	TRUE	UP
														TC1100002897.mm.2	Shmt1	1.51	0.0424957	0.000916664	TRUE	UP
														TC1700001688.mm.2	Decr2	0.6725	0.0425572	0.000919906	TRUE	UP
														TC0900001195.mm.2	Paqr9	1.94	0.0426535	0.000932315	TRUE	UP
														TC0800001112.mm.2	Cpne2	0.965	0.0426535	0.000933513	TRUE	UP
														TC1600000305.mm.2	Map3k13	1.865	0.0431608	0.000948503	TRUE	UP
														TC0600000362.mm.2	Trim24	2.815	0.0434891	0.000959636	TRUE	UP
														TC0500003463.mm.2	Pilra	1.56	0.0436668	0.000969455	TRUE	UP
														TC1100000614.mm.2	Irf1	0.855	0.0443567	0.000991657	TRUE	UP
														TC0400003208.mm.2	Acot11	2	0.0443567	0.000994368	TRUE	UP
														TC1600001770.mm.2	St3gal6	1.4	0.0443567	0.000994761	TRUE	UP
														TC0600002221.mm.2	Zfp467	1.4175	0.044427	0.000999959	TRUE	UP
														TC0100003422.mm.2	Atp1b1	0.8275	0.044427	0.00100034	TRUE	UP
														TC1300001812.mm.2	Nrn1	1.42	0.0447483	0.00101269	TRUE	UP
														TC0900002212.mm.2	Tagln	2.2175	0.0447483	0.00101703	TRUE	UP
														TC0X00002446.mm.2	Tex28	0.75	0.0447483	0.0010171	TRUE	UP
														TC1700001953.mm.2	Lst1	1.275	0.0450515	0.00103366	TRUE	UP
														TC0400002633.mm.2	Acnat2	1.65	0.0450867	0.00105485	TRUE	UP
														TC1100004278.mm.2	Vps25	0.7375	0.0450867	0.0010558	TRUE	UP
														TC1400002834.mm.2	Irf9	1.8475	0.0453134	0.00106565	TRUE	UP
														TC0400003219.mm.2	Dio1	4.175	0.0453134	0.00107037	TRUE	UP
														TC1600001556.mm.2	Parp14	2.1825	0.0453134	0.00107131	TRUE	UP
														TC0400003724.mm.2	Cd52	1.745	0.0453692	0.00107467	TRUE	UP
														TC0900001900.mm.2	Acp5	1.695	0.045832	0.00109362	TRUE	UP
														TC1500000688.mm.2	Apobec3	1.2175	0.0466359	0.00112568	TRUE	UP
														TC1300002079.mm.2	Cxcl14	1.825	0.0467102	0.00112958	TRUE	UP
														TC1600001750.mm.2	Tfg	0.9575	0.0468848	0.00114116	TRUE	UP
														TC0600003329.mm.2	Plbd1	1.72	0.0469542	0.00114605	TRUE	UP
														TC0100002576.mm.2	Tns1	1.4925	0.0470234	0.00114986	TRUE	UP
														TC1700002308.mm.2	Stap2	0.7175	0.0478911	0.00117323	TRUE	UP
														TC0100003697.mm.2	Lbr	1.2175	0.0480407	0.00118504	TRUE	UP
														TC0500003738.mm.2	Pcolce	1.4125	0.0480407	0.00118644	TRUE	UP
														TC1000002886.mm.2	Trhde	2.22	0.0480407	0.00119264	TRUE	UP
														TC1400002054.mm.2	Slc7a7	1.69	0.0480407	0.00119657	TRUE	UP
														TC0400002634.mm.2	Acnat1	1.4075	0.0480407	0.00119658	TRUE	UP
														TC0500002155.mm.2	Adgrf3	1.1375	0.0480407	0.00119998	TRUE	UP
														TC0400000961.mm.2	Fggy	0.95	0.0480407	0.00120374	TRUE	UP
														TC1400002067.mm.2	Slc7a8	1.72	0.0480407	0.00120778	TRUE	UP
														TC1900001415.mm.2	Acta2	3.1625	0.0480407	0.00121182	TRUE	UP
														TC1700000639.mm.2	Agpat1	0.825	0.0480407	0.00121353	TRUE	UP
														TC0200001226.mm.2	Slc43a3	0.84	0.0480407	0.00121367	TRUE	UP
														TC1100003399.mm.2	Ccl6	2.8475	0.0481238	0.00122227	TRUE	UP
														TC1100002643.mm.2	Gm12185; Tgtp1	3.745	0.0483829	0.00123539	TRUE	UP
														TC0500002745.mm.2	G3bp2	1.6575	0.0487316	0.00124873	TRUE	UP
														TC0700000236.mm.2	Slc1a5	2.4375	0.0489638	0.00126786	TRUE	UP
														TC0200005317.mm.2	Slmo2	1.5875	0.049211	0.00127927	TRUE	UP
														TC1300002717.mm.2	Itga1; Pelo	1.02	0.049211	0.00129775	TRUE	UP
														TC0900002389.mm.2	Pml	1.0775	0.0500316	0.00133661	TRUE	UP
														TC0500002833.mm.2	Sec31a	0.8825	0.0500316	0.00133875	TRUE	UP
														TC0500000997.mm.2	Arhgap24	1.23	0.0500316	0.00134057	TRUE	UP
														TC0200002295.mm.2	H13	1.0575	0.0500509	0.00134335	TRUE	UP
														TC1900000211.mm.2	Slc15a3	1.7625	0.0500965	0.00134908	TRUE	UP
														TC0200000585.mm.2	Fam102a	0.95	0.0501481	0.00135357	TRUE	UP
														TC1000002211.mm.2	Oit3	0.725	0.0501481	0.00135499	TRUE	UP
														TC0200004811.mm.2	Cd93	0.73	0.0501495	0.00137183	TRUE	UP
														TC0400002079.mm.2	Nadk	1.5075	0.0502663	0.00138308	TRUE	UP
														TC1000000030.mm.2	Esr1	2.2725	0.0504722	0.00139455	TRUE	UP
														TC0400003681.mm.2	Themis2	2.2075	0.0505499	0.00141099	TRUE	UP
														TC0200004647.mm.2	Siglec1	2.3875	0.0505499	0.00141151	TRUE	UP
														TC0800001407.mm.2	Plcg2	0.99	0.0505499	0.00141154	TRUE	UP
														TC1900001484.mm.2	Pdlim1	2.01	0.0514776	0.00145118	TRUE	UP
														TC1600001349.mm.2	Alg3	1.09	0.0518099	0.00146522	TRUE	UP
														TC0500000547.mm.2	Stim2	3.0475	0.0524455	0.00149049	TRUE	UP
														TC1500001982.mm.2	Sult4a1	2.5625	0.0524455	0.0014985	TRUE	UP
														TC1300002237.mm.2	Mterf3	0.9	0.0524455	0.00150015	TRUE	UP
														TC0200001380.mm.2	Arhgap1	1.06	0.0524455	0.00150319	TRUE	UP
														TC1100001238.mm.2	Slfn2	1.8125	0.0524455	0.00150445	TRUE	UP
														TC0100001520.mm.2	Mpc2	1.2275	0.0524612	0.00150726	TRUE	UP
														TC1300001155.mm.2	Cd180	1.5025	0.0526104	0.00151866	TRUE	UP
														TC1200000865.mm.2	Cipc	0.7025	0.0526575	0.00152476	TRUE	UP
														TC0100001755.mm.2	Aida	0.9175	0.0527066	0.00152855	TRUE	UP
														TC0100000334.mm.2	Ercc5	1.1575	0.0531041	0.00154486	TRUE	UP
														TC1200000145.mm.2	Hpcal1	0.9625	0.053204	0.00155636	TRUE	UP
														TC0700003764.mm.2	Thrsp	1.52	0.0534481	0.00157413	TRUE	UP
														TC0X00002826.mm.2	Taf9b	1.0225	0.0540381	0.0015987	TRUE	UP
														TC0800001420.mm.2	Osgin1	2.385	0.0542806	0.0016092	TRUE	UP
														TC0X00002061.mm.2	Ndufa1	0.6625	0.054392	0.00162175	TRUE	UP
														TC1700002692.mm.2	Calm2	0.6325	0.054392	0.00162397	TRUE	UP
														TC1600001240.mm.2	Ifitm7	1.0725	0.0544184	0.00162721	TRUE	UP
														TC0700001258.mm.2	Ctsc	2.065	0.0554124	0.00166442	TRUE	UP
														TC0800001118.mm.2	Ccl22	0.73	0.0557705	0.00167769	TRUE	UP
														TC0200003195.mm.2	Agpat2	0.7225	0.0565663	0.00171181	TRUE	UP
														TC0900000199.mm.2	AB124611	1.6775	0.0566595	0.00172316	TRUE	UP
														TC0500003399.mm.2	Ccl24	2.0825	0.0566595	0.00172473	TRUE	UP
														TC0100003550.mm.2	Slamf7	1.66	0.0566595	0.00172687	TRUE	UP
														TC0X00002472.mm.2	F8	1.0325	0.057	0.00174034	TRUE	UP
														TC1600000224.mm.2	Klhl22	0.76	0.0572974	0.00175759	TRUE	UP
														TC0300002695.mm.2	Cd53	1.86	0.0572974	0.00175817	TRUE	UP
														TC1100002015.mm.2	Baiap2	1.19	0.0572974	0.00176232	TRUE	UP
														TC1000002253.mm.2	Tspan15	0.655	0.0574298	0.00176898	TRUE	UP
														TC1500001935.mm.2	Desi1	1.0775	0.057656	0.00179153	TRUE	UP
														TC1700000992.mm.2	Ebi3	0.8075	0.0578014	0.00179865	TRUE	UP
														TC1100003382.mm.2	Slfn8	3.08	0.0582036	0.00184114	TRUE	UP
														TC1400000513.mm.2	Lgals3	1.2225	0.0582036	0.0018419	TRUE	UP
														TC0500001894.mm.2	Cyp51	2.7425	0.058634	0.00186931	TRUE	UP
														TC1500000939.mm.2	Ano6	1.3375	0.058634	0.00187354	TRUE	UP
														TC0900001616.mm.2	Trak1	1.195	0.058634	0.00187398	TRUE	UP
														TC1000002549.mm.2	Tle6	1.18	0.058634	0.00187643	TRUE	UP
														TC0400003249.mm.2	Prpf38a	1.045	0.058634	0.00188163	TRUE	UP
														TC0500003596.mm.2	Cyp3a16	9.4275	0.0587027	0.00189278	TRUE	UP
														TC1600000564.mm.2	Igsf11	1.62	0.0587578	0.00189722	TRUE	UP
														TC0900003275.mm.2	Higd1a	0.7675	0.0587578	0.00189985	TRUE	UP
														TC0700002951.mm.2	Siglece	1.9525	0.0587726	0.00191356	TRUE	UP
														TC0500000349.mm.2	Ywhah	0.69	0.0588123	0.00192015	TRUE	UP
														TC0500002415.mm.2	Sepsecs	1.145	0.0588748	0.00192485	TRUE	UP
														TC0900000006.mm.2	Gm10717	2.0075	0.0593488	0.00195106	TRUE	UP
														TC0700002078.mm.2	Lsp1	0.945	0.0593488	0.00195776	TRUE	UP
														TC0100003891.mm.2	Ifi203	1.9325	0.0593625	0.00197486	TRUE	UP
														TC1000001599.mm.2	Cs	1.2	0.0594119	0.00198192	TRUE	UP
														TC0600000553.mm.2	Sspo	2.545	0.0594119	0.00198254	TRUE	UP
														TC1700002221.mm.2	1700122O11Rik	0.58	0.0596113	0.00199456	TRUE	UP
														TC0800001186.mm.2	Pdp2	1.3825	0.0596515	0.00199859	TRUE	UP
														TC0600001532.mm.2	Clec12a	1.9675	0.0597996	0.00201163	TRUE	UP
														TC0200002366.mm.2	Trp53inp2	1.285	0.0598424	0.00201724	TRUE	UP
														TC1500001729.mm.2	Ly6c1	1.9775	0.0598424	0.00201846	TRUE	UP
														TC0400003792.mm.2	C1qb	2.3975	0.0604467	0.00204429	TRUE	UP
														TC1200002525.mm.2	Serpina3g	1.335	0.0610126	0.00207991	TRUE	UP
														TC0200002367.mm.2	Acss2	2.115	0.0613342	0.00210171	TRUE	UP
														TC1500001838.mm.2	Rac2	1.7075	0.0613417	0.00210494	TRUE	UP
														TC1100000093.mm.2	Ogdh	0.59	0.0613832	0.00210913	TRUE	UP
														TC1700002791.mm.2	H2-Q1	1.8925	0.0621878	0.00214238	TRUE	UP
														TC1100001070.mm.2	Rilp	0.84	0.0622133	0.00215083	TRUE	UP
														TC0X00000574.mm.2	4933402E13Rik	1.08	0.0622133	0.0021598	TRUE	UP
														TC1100002127.mm.2	Emid1	1.0225	0.0626073	0.00218287	TRUE	UP
														TC0800000368.mm.2	Rnf122	1.6825	0.0626073	0.00218502	TRUE	UP
														TC1900001765.mm.2	Vps51; Tm7sf2	1.48	0.063461	0.00222054	TRUE	UP
														TC1300000425.mm.2	Ly86	2.5025	0.0635424	0.00223042	TRUE	UP
														TC1900000399.mm.2	Dock8	1.07	0.0635424	0.00223197	TRUE	UP
														TC1200001981.mm.2	Rdh11	2.245	0.0644971	0.00227335	TRUE	UP
														TC1400000363.mm.2	Gdf10	1.075	0.0644971	0.00227421	TRUE	UP
														TC0500001225.mm.2	Mvk	2.17	0.0645107	0.00228039	TRUE	UP
														TC0100001510.mm.2	Dpt	2.05	0.0648092	0.00229853	TRUE	UP
														TC0500001239.mm.2	Oasl2	2.5825	0.0648092	0.00230286	TRUE	UP
														TC0300002506.mm.2	Fcgr1	2.01	0.0648092	0.00230965	TRUE	UP
														TC0500003532.mm.2	Mmd2	5.025	0.0648092	0.00231832	TRUE	UP
														TC0900000051.mm.2	Mmp27	2.26	0.0648092	0.00232451	TRUE	UP
														TC1800001595.mm.2	Lipg	1.9875	0.0648092	0.00232608	TRUE	UP
														TC1100003506.mm.2	Scpep1	1.4175	0.064938	0.00233363	TRUE	UP
														TC1300000157.mm.2	Aoah	1.58	0.0649602	0.00233921	TRUE	UP
														TC0900000031.mm.2	Casp1	1.2325	0.0649712	0.00235626	TRUE	UP
														TC1000001595.mm.2	Apof	0.6625	0.0651034	0.00238648	TRUE	UP
														TC0X00001024.mm.2	Chic1	2.72	0.0651681	0.00239685	TRUE	UP
														TC0500003090.mm.2	Mlec	0.7975	0.0651681	0.00239871	TRUE	UP
														TC0X00001859.mm.2	Med14	0.9975	0.0656106	0.00242576	TRUE	UP
														TC0X00000685.mm.2	Bgn	0.935	0.0660569	0.00246153	TRUE	UP
														TC1700001827.mm.2	Sik1	2.2875	0.0660569	0.0024633	TRUE	UP
														TC1800001197.mm.2	Cd14	2.1875	0.0660569	0.00246531	TRUE	UP
														TC1200002506.mm.2	Dnah11	3.995	0.0660569	0.0024673	TRUE	UP
														TC1700002346.mm.2	Slc25a23	1.15	0.0666121	0.00249578	TRUE	UP
														TC1700002536.mm.2	Nlrc4	1.1675	0.0668539	0.0025101	TRUE	UP
														TC0700002636.mm.2	Ceacam2	0.59	0.0668539	0.00251358	TRUE	UP
														TC0800002734.mm.2	Ciapin1	1.4825	0.0668539	0.00251387	TRUE	UP
														TC0700000561.mm.2	Tyrobp	1.5625	0.0668558	0.00251695	TRUE	UP
														TC1700001194.mm.2	Qpct	1.715	0.0675006	0.00255035	TRUE	UP
														TC0700002974.mm.2	Atf5	2.0625	0.0675025	0.00255534	TRUE	UP
														TC0200001368.mm.2	Spi1	2.2475	0.0675025	0.00255657	TRUE	UP
														TC1200002524.mm.2	Serpina3f	0.9625	0.0675025	0.00255965	TRUE	UP
														TC1700002778.mm.2	Tapbp	0.74	0.0675025	0.00256258	TRUE	UP
														TC0100003204.mm.2	Rgs2	1.5525	0.0677767	0.00257604	TRUE	UP
														TC0400004199.mm.2	Gm13212	1.015	0.0681784	0.00260359	TRUE	UP
														TC0100001617.mm.2	Tagln2	2.2175	0.0688134	0.00263713	TRUE	UP
														TC1400002162.mm.2	Phf11b	2.375	0.0694022	0.00267512	TRUE	UP
														TC0300003013.mm.2	Dapp1	1.4475	0.0694022	0.00268005	TRUE	UP
														TC1800001437.mm.2	Adrb2	1.575	0.0696241	0.00269849	TRUE	UP
														TC1300001911.mm.2	Atxn1	1.6925	0.0696241	0.00269956	TRUE	UP
														TC1100003314.mm.2	Lgals9	1.265	0.0696938	0.0027054	TRUE	UP
														TC0700002644.mm.2	Axl	1.975	0.0697159	0.00271433	TRUE	UP
														TC0600003539.mm.2	D630045J12Rik	0.9425	0.0697159	0.00271567	TRUE	UP
														TC1100003640.mm.2	Kpnb1	0.675	0.0697912	0.00272175	TRUE	UP
														TC1700001993.mm.2	H2-T24	1.0975	0.0704171	0.00275567	TRUE	UP
														TC1200001272.mm.2	Pld4	1.9125	0.0705223	0.00276297	TRUE	UP
														TC0400000212.mm.2	Ndufaf4	0.6925	0.0705958	0.00276902	TRUE	UP
														TC0900001232.mm.2	Rbp1	2.8375	0.0707562	0.00278366	TRUE	UP
														TC1700000835.mm.2	Pla2g7	1.7325	0.0707562	0.00278487	TRUE	UP
														TC0400000459.mm.2	Ccin	0.82	0.0711259	0.00280263	TRUE	UP
														TC0100002859.mm.2	Slco6c1	0.92	0.0711736	0.00281179	TRUE	UP
														TC0700002705.mm.2	Nfkbib	0.5875	0.0713212	0.00282638	TRUE	UP
														TC1400000263.mm.2	Arf4	0.9575	0.0717286	0.00284921	TRUE	UP
														TC0700004516.mm.2	Ifitm6	0.9975	0.0717286	0.00285222	TRUE	UP
														TC0900001483.mm.2	Lrrfip2	1.2125	0.0717714	0.00285743	TRUE	UP
														TC0400002216.mm.2	Pdp1	2.09	0.0717714	0.00287963	TRUE	UP
														TC0X00003360.mm.2	Tlr7	3.06	0.0717714	0.00287976	TRUE	UP
														TC0700001710.mm.2	Acsm2	2.25	0.0717714	0.00288302	TRUE	UP
														TC0X00000122.mm.2	Sytl5	3.125	0.0717714	0.00289235	TRUE	UP
														TC0100002969.mm.2	Insig2	1.8025	0.0718628	0.00290437	TRUE	UP
														TC0200001866.mm.2	Sema6d	0.8075	0.0718628	0.0029061	TRUE	UP
														TC0100001632.mm.2	Pyhin1	2.2975	0.0718715	0.00290968	TRUE	UP
														TC0900001005.mm.2	Fam214a	1.0425	0.0725913	0.00296026	TRUE	UP
														TC0200004046.mm.2	Olfr1225	0.7525	0.0725913	0.00296171	TRUE	UP
														TC1800000249.mm.2	Lims2	1.325	0.0727714	0.00297565	TRUE	UP
														TC0700003028.mm.2	Emp3	1.6175	0.0727714	0.00298217	TRUE	UP
														TC0300002334.mm.2	Fdps	1.665	0.073728	0.00304478	TRUE	UP
														TC1600001008.mm.2	Son	0.665	0.073728	0.00304793	TRUE	UP
														TC0100000766.mm.2	Sp100	1.77	0.0739704	0.00307641	TRUE	UP
														TC0100000927.mm.2	Sned1; Mir6901	1.165	0.074106	0.00309208	TRUE	UP
														TC0700004291.mm.2	Sult1a1	1.2075	0.074106	0.00309693	TRUE	UP
														TC1700002822.mm.2	H2-T22; H2-T9	0.9825	0.0744559	0.00311826	TRUE	UP
														TC0200001959.mm.2	Sirpa	1.1725	0.0746925	0.00313153	TRUE	UP
														TC1800000741.mm.2	Tcf4	1.27	0.074878	0.00314605	TRUE	UP
														TC0600001890.mm.2	Tfec	0.89	0.0749974	0.00315444	TRUE	UP
														TC1100002649.mm.2	Tgtp2	3.305	0.075112	0.00316916	TRUE	UP
														TC0X00001934.mm.2	Cfp	2.185	0.075112	0.00317159	TRUE	UP
														TC0700000806.mm.2	Josd2; Mir7052	1.2275	0.075112	0.00319433	TRUE	UP
														TC1300001574.mm.2	Hist1h2ah	0.8	0.075112	0.00319795	TRUE	UP
														TC0200005438.mm.2	Helz2	1.08	0.075112	0.00319835	TRUE	UP
														TC0200000240.mm.2	Vim	1.65	0.075112	0.00320243	TRUE	UP
														TC0700004530.mm.2	Irf7	3.27	0.0754736	0.00323565	TRUE	UP
														TC0600000229.mm.2	Calu	0.6625	0.0760671	0.00327137	TRUE	UP
														TC1500000199.mm.2	Dap	0.6125	0.0761668	0.00327909	TRUE	UP
														TC1800000163.mm.2	Rnf138	0.6825	0.0762024	0.00328405	TRUE	UP
														TC0100000372.mm.2	Sdpr	1.4325	0.0767165	0.00331775	TRUE	UP
														TC1100001267.mm.2	Wfdc21	0.7075	0.0767165	0.00332003	TRUE	UP
														TC1100003055.mm.2	Cd68	2.375	0.0768531	0.0033294	TRUE	UP
														TC1100001072.mm.2	Slc43a2	1.4775	0.0774882	0.00336389	TRUE	UP
														TC0100000836.mm.2	Ugt1a2; Ugt1a6a; Ugt1a6b; Ugt1a10; Ugt1a7c; Ugt1a5; Ugt1a9; Ugt1a1	0.7025	0.0780422	0.00340533	TRUE	UP
														TC0800000096.mm.2	Arhgef7	0.815	0.0783786	0.00343431	TRUE	UP
														TC0900000032.mm.2	Casp4	1.0675	0.0788939	0.003464	TRUE	UP
														TC1000003140.mm.2	Coq10a	1.6125	0.0792319	0.00348711	TRUE	UP
														TC0200003278.mm.2	Ptges	0.94	0.0793244	0.00349719	TRUE	UP
														TC0100003888.mm.2	Ifi204	2.52	0.0798394	0.00352349	TRUE	UP
														TC0500002078.mm.2	Fastk	0.895	0.0799	0.00353336	TRUE	UP
														TC1100000705.mm.2	Olfr311	0.9175	0.0802624	0.00355661	TRUE	UP
														TC0800002819.mm.2	Fhod1	1.05	0.0808626	0.00358685	TRUE	UP
														TC0800001396.mm.2	Bco1	1.3075	0.0810522	0.00360112	TRUE	UP
														TC0800000937.mm.2	Asf1b	0.9475	0.0813987	0.00362896	TRUE	UP
														TC0800001033.mm.2	Nkd1	0.6	0.0819966	0.00366411	TRUE	UP
														TC0200001053.mm.2	Zak	0.6125	0.0819966	0.0036663	TRUE	UP
														TC0600003079.mm.2	C3ar1	1.13	0.0819966	0.0036667	TRUE	UP
														TC0200002308.mm.2	Hck	1.52	0.0823719	0.00369834	TRUE	UP
														TC0800002665.mm.2	Sall1	1.7175	0.0823719	0.00370944	TRUE	UP
														TC1100003141.mm.2	Slc13a5	2.0675	0.0824453	0.00371646	TRUE	UP
														TC1600001824.mm.2	Nsun3	1.0375	0.0825021	0.00372274	TRUE	UP
														TC0600002422.mm.2	Gadd45a	1.0225	0.0827766	0.00374298	TRUE	UP
														TC0500003730.mm.2	Gbp9	1.8825	0.0828005	0.00375112	TRUE	UP
														TC0500001408.mm.2	Tmem120b	1.6825	0.0833335	0.00379021	TRUE	UP
														TC0500001796.mm.2	Rasl11a	0.645	0.0833335	0.00379215	TRUE	UP
														TC1700001949.mm.2	Apom	0.9	0.0837168	0.00381902	TRUE	UP
														TC0200004959.mm.2	Ncoa6	1.0425	0.0838399	0.00383974	TRUE	UP
														TC0700003775.mm.2	Acer3	1.27	0.0840144	0.00386664	TRUE	UP
														TC0500002420.mm.2	Sel1l3	1.6	0.084016	0.00387772	TRUE	UP
														TC0500003178.mm.2	Oas1c	0.83	0.084533	0.00392734	TRUE	UP
														TC0500003465.mm.2	Pilrb2	1.695	0.084533	0.00393156	TRUE	UP
														TC0200003720.mm.2	Slc25a12	1.39	0.0845753	0.0039451	TRUE	UP
														TC1500001002.mm.2	Tuba1c	1.1575	0.0845753	0.00394578	TRUE	UP
														TC1100001147.mm.2	Tlcd1; Mir7653	0.8025	0.0850379	0.00397119	TRUE	UP
														TC0X00000801.mm.2	Tmem47	1.1575	0.0852385	0.00399816	TRUE	UP
														TC0700001399.mm.2	Chrdl2	1.55	0.0852385	0.00400171	TRUE	UP
														TC1300001585.mm.2	Vmn1r191	0.685	0.0853405	0.00401607	TRUE	UP
														TC1100000484.mm.2	Timd4	1.25	0.0857444	0.00403894	TRUE	UP
														TC1100001474.mm.2	Gngt2	1.195	0.0859334	0.00405558	TRUE	UP
														TC1400000076.mm.2	Pxk	1.0075	0.0860555	0.00407689	TRUE	UP
														TC1400000316.mm.2	Mustn1	1.1175	0.0860555	0.00408001	TRUE	UP
														TC0500003685.mm.2	N4bp2l1	1.04	0.0860555	0.00408641	TRUE	UP
														TC1600001380.mm.2	Dgkg	0.85	0.0860555	0.00408679	TRUE	UP
														TC0800000758.mm.2	Lrrc25	1.345	0.0860555	0.00409795	TRUE	UP
														TC0500003368.mm.2	Ncf1	1.7475	0.0860555	0.00410217	TRUE	UP
														TC0300002361.mm.2	Ubap2l	0.74	0.0860555	0.00410397	TRUE	UP
														TC0700001875.mm.2	Itgam	1.1475	0.08615	0.00411624	TRUE	UP
														TC0700002655.mm.2	Cyp2a22	4.28	0.0867415	0.00415231	TRUE	UP
														TC0200003630.mm.2	Ifih1	2.3275	0.0869331	0.0041935	TRUE	UP
														TC0700001141.mm.2	Zfp710	1.0875	0.0869331	0.00419476	TRUE	UP
														TC1100002269.mm.2	Meis1	0.92	0.0873407	0.00422819	TRUE	UP
														TC0100002392.mm.2	Trak2	1.36	0.087406	0.00423762	TRUE	UP
														TC1100001115.mm.2	Ssh2	0.6675	0.087406	0.00424587	TRUE	UP
														TC1300002531.mm.2	Naip5	1.6075	0.087406	0.00425619	TRUE	UP
														TC1500002246.mm.2	Smagp	1.4725	0.0876511	0.00428267	TRUE	UP
														TC0700000399.mm.2	Gm9844	0.9725	0.0877721	0.00429651	TRUE	UP
														TC1100002921.mm.2	Ulk2	1.1325	0.0880504	0.0043141	TRUE	UP
														TC0400004216.mm.2	Podn	1.0125	0.088229	0.0043382	TRUE	UP
														TC1200000996.mm.2	9030617O03Rik	1.5375	0.088229	0.00434078	TRUE	UP
														TC0300001521.mm.2	Adgrl4	0.81	0.088229	0.00434271	TRUE	UP
														TC0900002320.mm.2	Dmxl2	1.04	0.0885646	0.00436721	TRUE	UP
														TC0500000527.mm.2	Sod3	1.33	0.088781	0.00438987	TRUE	UP
														TC0600000277.mm.2	Mest	1.565	0.089655	0.00446276	TRUE	UP
														TC0300001850.mm.2	Anxa5	0.7625	0.089655	0.00446455	TRUE	UP
														TC1300002517.mm.2	Ptcd2	0.765	0.089655	0.00446691	TRUE	UP
														TC1000002945.mm.2	Rap1b	0.705	0.089655	0.00447389	TRUE	UP
														TC1100004233.mm.2	Fasn	2.315	0.0899117	0.00449507	TRUE	UP
														TC0400002523.mm.2	Cd72	1.6425	0.0899117	0.00449842	TRUE	UP
														TC0400003793.mm.2	C1qc	2.1125	0.0900109	0.00451149	TRUE	UP
														TC1900000916.mm.2	Adrbk1	0.7	0.0904318	0.00454073	TRUE	UP
														TC0800001212.mm.2	E2f4	1.05	0.0904589	0.00456627	TRUE	UP
														TC1600000489.mm.2	Hacd2	1.1525	0.0908101	0.00459801	TRUE	UP
														TC1500002265.mm.2	Gm5476	0.5825	0.0908101	0.00460846	TRUE	UP
														TC1300000919.mm.2	Glrx	0.6775	0.0908101	0.0046088	TRUE	UP
														TC1400001012.mm.2	Gfra2	1.245	0.0911744	0.0046314	TRUE	UP
														TC1600001692.mm.2	Dzip3	0.9075	0.0912791	0.00464981	TRUE	UP
														TC0400004221.mm.2	AU022252	0.715	0.0914719	0.00467946	TRUE	UP
														TC0100001387.mm.2	Glul; Mir8114	0.83	0.0917487	0.00472912	TRUE	UP
														TC1100001634.mm.2	Atp6v0a1	0.895	0.0926832	0.00481472	TRUE	UP
														TC1400000459.mm.2	Ear12; Ear2; Ear3	1.3575	0.0926832	0.00481655	TRUE	UP
														TC0400002578.mm.2	Slc25a51	1.4225	0.0927114	0.004838	TRUE	UP
														TC0700002970.mm.2	Nr1h2	0.7325	0.0927114	0.00484307	TRUE	UP
														TC0300000769.mm.2	Adar	1.5275	0.0928816	0.00487288	TRUE	UP
														TC0700003013.mm.2	Fgf21	1.6425	0.0928816	0.0048878	TRUE	UP
														TC0X00003358.mm.2	Tmsb4x	1.0475	0.0928816	0.0048882	TRUE	UP
														TC0500003729.mm.2	Gbp8	1.4425	0.0928816	0.00490215	TRUE	UP
														TC0100000333.mm.2	Bivm	1.11	0.0929786	0.00495256	TRUE	UP
														TC0300000903.mm.2	Ctss	1.6275	0.0929786	0.00495706	TRUE	UP
														TC0400002251.mm.2	Ripk2	1.495	0.0929786	0.00495849	TRUE	UP
														TC0200001171.mm.2	Dnajc10	0.78	0.0929786	0.00496121	TRUE	UP
														TC0200002362.mm.2	Dynlrb1	1.1375	0.0929786	0.00496171	TRUE	UP
														TC0200004537.mm.2	Atp8b4	1.13	0.092981	0.00497255	TRUE	UP
														TC0300002718.mm.2	Csf1	2.32	0.0929832	0.00498289	TRUE	UP
														TC1100004159.mm.2	Lgals3bp	2.2725	0.0929945	0.00501417	TRUE	UP
														TC1300000245.mm.2	Hist1h2af	1.3625	0.0930017	0.00503414	TRUE	UP
														TC0700004207.mm.2	Igsf6	2.0175	0.0932247	0.0050588	TRUE	UP
														TC1000001190.mm.2	Lum	1.3375	0.0934986	0.00508604	TRUE	UP
														TC0700003845.mm.2	Folr2	2.8725	0.0936013	0.00509719	TRUE	UP
														TC0600003030.mm.2	Wnk1	0.58	0.0936013	0.00510102	TRUE	UP
														TC1100002642.mm.2	Gm5431	1.25	0.0936013	0.00510453	TRUE	UP
														TC0700001913.mm.2	Htra1	1.245	0.0936639	0.00511518	TRUE	UP
														TC0900002213.mm.2	Sidt2	1.095	0.0936639	0.00511638	TRUE	UP
														TC0700001841.mm.2	Itgal	1.2375	0.0938597	0.00513436	TRUE	UP
														TC1300002076.mm.2	Tifab	1.005	0.0938597	0.0051375	TRUE	UP
														TC0800001572.mm.2	Kcnk1	1.9375	0.0938597	0.00513976	TRUE	UP
														TC1400002869.mm.2	Phf11d; Phf11c	1.675	0.0941859	0.00517459	TRUE	UP
														TC0700002159.mm.2	Ppp1r12c	0.7975	0.0943052	0.00519097	TRUE	UP
														TC1100001887.mm.2	Tmem104	0.7	0.0943052	0.00519388	TRUE	UP
														TC1100002967.mm.2	Cox10	0.7225	0.0946832	0.00523642	TRUE	UP
														TC1400001868.mm.2	Ear1	1.2975	0.0946832	0.00523981	TRUE	UP
														TC1000002814.mm.2	Acss3	1.775	0.0946832	0.00524028	TRUE	UP
														TC1600000558.mm.2	Tmem39a	0.76	0.0949419	0.00526315	TRUE	UP
														TC1400001002.mm.2	Nudt18	1.7825	0.0949532	0.00526826	TRUE	UP
														TC0700004631.mm.2	Pirb	1.525	0.0949532	0.00527233	TRUE	UP
														TC1100003397.mm.2	Ccl9	0.92	0.0952487	0.00529302	TRUE	UP
														TC0200005013.mm.2	Samhd1	1.4925	0.0952797	0.00530287	TRUE	UP
														TC1100001150.mm.2	Proca1	0.84	0.0957407	0.00534192	TRUE	UP
														TC0600002044.mm.2	Slc35b4	0.6625	0.0960921	0.00537018	TRUE	UP
														TC0500001139.mm.2	Pole	0.7625	0.0965139	0.00541114	TRUE	UP
														TC1100000362.mm.2	Lcp2	1.6125	0.0965639	0.00541829	TRUE	UP
														TC0800003072.mm.2	Rnf166	1.11	0.0969142	0.00546413	TRUE	UP
														TC1200002411.mm.2	Ckb	0.9075	0.0970302	0.00547896	TRUE	UP
														TC1200002270.mm.2	Ifi27l2b	1.2475	0.0973654	0.00552027	TRUE	UP
														TC0800002558.mm.2	Adgre5; Mir1668	1.475	0.0980367	0.00558172	TRUE	UP
														TC0500001575.mm.2	Mlxipl	0.7425	0.0980367	0.00559314	TRUE	UP
														TC1800000286.mm.2	Pkd2l2	1.2525	0.0980367	0.00559365	TRUE	UP
														TC1200000458.mm.2	Srp54a	0.8475	0.0980572	0.00559923	TRUE	UP
														TC1500000008.mm.2	Oxct1	0.9375	0.0981252	0.00561333	TRUE	UP
														TC0X00002393.mm.2	BC023829	1.125	0.0981252	0.00561637	TRUE	UP
														TC1700001952.mm.2	Aif1	1.2825	0.0985543	0.00567161	TRUE	UP
														TC1400000292.mm.2	Lrtm1	2.2475	0.0985543	0.005672	TRUE	UP
														TC0600001418.mm.2	Cd163	1.885	0.0987988	0.00570493	TRUE	UP
														TC0600002114.mm.2	Parp12	1.69	0.0987988	0.00570831	TRUE	UP
														TC1600000861.mm.2	Usp25	0.8125	0.0988003	0.00571285	TRUE	UP
														TC0600002324.mm.2	Ggct	1.15	0.0991995	0.00574363	TRUE	UP
														TC0300002310.mm.2	Pmf1	0.7725	0.0997568	0.00579511	TRUE	UP
														TC0300002957.mm.2	Cyp2u1	-4.645	0.000532761	2.05451e-07	TRUE	DOWN
														TC0500002692.mm.2	Ugt2b36	-1.4	0.00111274	6.5143e-07	TRUE	DOWN
														TC1100003276.mm.2	Pipox	-1.1225	0.00170614	1.21749e-06	TRUE	DOWN
														TC0300001322.mm.2	Etnppl	-6.7875	0.00170614	1.29054e-06	TRUE	DOWN
														TC1100003561.mm.2	Abcc3	-5.625	0.00170614	1.30615e-06	TRUE	DOWN
														TC0700000458.mm.2	Blvrb	-2.095	0.00192799	1.56281e-06	TRUE	DOWN
														TC1400000301.mm.2	Chdh	-2.7125	0.00224308	1.91923e-06	TRUE	DOWN
														TC0600001296.mm.2	44263	-1.3475	0.00289302	3.38731e-06	TRUE	DOWN
														TC1200000236.mm.2	Adi1	-1.6975	0.00290224	3.52879e-06	TRUE	DOWN
														TC0800000538.mm.2	Acsl1	-3.175	0.00324799	4.15127e-06	TRUE	DOWN
														TC0500002693.mm.2	Ugt2b5	-1.725	0.00530198	7.87792e-06	TRUE	DOWN
														TC0300001365.mm.2	Bdh2	-2.3025	0.00530198	7.96829e-06	TRUE	DOWN
														TC0400001681.mm.2	Tcea3	-2.02	0.00530198	8.11795e-06	TRUE	DOWN
														TC0200002869.mm.2	Mcm10	-4.2825	0.00656797	1.10102e-05	TRUE	DOWN
														TC0600002620.mm.2	Nat8	-2.775	0.00656797	1.23043e-05	TRUE	DOWN
														TC0300001482.mm.2	Ddah1	-6.0725	0.00656797	1.29318e-05	TRUE	DOWN
														TC0300002277.mm.2	Cd1d1	-1.995	0.00656797	1.38512e-05	TRUE	DOWN
														TC1900000250.mm.2	Glyat	-1.1475	0.00656797	1.39261e-05	TRUE	DOWN
														TC0X00003057.mm.2	Serpina7	-4.7325	0.00656797	1.47887e-05	TRUE	DOWN
														TC0800002704.mm.2	Ces1e	-2.0775	0.00700166	1.67112e-05	TRUE	DOWN
														TC0100000427.mm.2	Aox1	-3.5275	0.00740919	1.83887e-05	TRUE	DOWN
														TC1300000442.mm.2	Dsp	-1.5525	0.00740919	1.86848e-05	TRUE	DOWN
														TC1000003127.mm.2	Hsd17b6	-6.1675	0.00745097	1.91962e-05	TRUE	DOWN
														TC1900001477.mm.2	Cyp2c67	-3.455	0.00745097	1.96664e-05	TRUE	DOWN
														TC0900003293.mm.2	Zfp445	-1.5	0.00745097	1.97968e-05	TRUE	DOWN
														TC0X00002482.mm.2	Pls3	-1.2125	0.00745967	2.01666e-05	TRUE	DOWN
														TC1900001550.mm.2	Cyp2c44	-6.1425	0.00749121	2.09157e-05	TRUE	DOWN
														TC0100003104.mm.2	Adora1	-2.3575	0.00811811	2.41284e-05	TRUE	DOWN
														TC1400001661.mm.2	Itih3	-2.0375	0.00879376	2.83897e-05	TRUE	DOWN
														TC0700000652.mm.2	Cebpa	-1.7975	0.00879376	2.852e-05	TRUE	DOWN
														TC0300001221.mm.2	Dpyd	-1.91	0.00881358	3.05861e-05	TRUE	DOWN
														TC1000001577.mm.2	Sdr9c7	-2.2475	0.00881358	3.10225e-05	TRUE	DOWN
														TC1600000335.mm.2	St6gal1	-2.1225	0.00881358	3.13552e-05	TRUE	DOWN
														TC1500001430.mm.2	Dpys	-1.845	0.00899543	3.39376e-05	TRUE	DOWN
														TC1500001038.mm.2	Atf1	-0.945	0.00899543	3.49379e-05	TRUE	DOWN
														TC0500002882.mm.2	Hsd17b11	-1.8	0.00952513	3.79049e-05	TRUE	DOWN
														TC0900000786.mm.2	Anp32a	-0.9425	0.00952513	3.8176e-05	TRUE	DOWN
														TC0300001494.mm.2	Uox	-2.9075	0.00995743	4.12539e-05	TRUE	DOWN
														TC1300000016.mm.2	Akr1c14	-1.8725	0.00999892	4.23263e-05	TRUE	DOWN
														TC0100001550.mm.2	Aldh9a1	-0.975	0.0102063	4.36638e-05	TRUE	DOWN
														TC0900001376.mm.2	Hyal1; Nat6; Hyal3	-0.9675	0.0102465	4.47588e-05	TRUE	DOWN
														TC1300001378.mm.2	Akr1c12	-1.895	0.0110712	5.03682e-05	TRUE	DOWN
														TC0100003662.mm.2	Adck3	-1.5825	0.0110712	5.08538e-05	TRUE	DOWN
														TC0600001458.mm.2	Scnn1a	-1.0975	0.0120487	5.70961e-05	TRUE	DOWN
														TC0X00000323.mm.2	Pgrmc1	-0.845	0.0120487	5.81826e-05	TRUE	DOWN
														TC0400002174.mm.2	Car8	-2.3125	0.0120487	6.03511e-05	TRUE	DOWN
														TC1700001805.mm.2	Glo1	-2.2325	0.0120487	6.03942e-05	TRUE	DOWN
														TC0X00001501.mm.2	Alas2	-3.3425	0.0120487	6.12275e-05	TRUE	DOWN
														TC0600001696.mm.2	Etnk1	-1.41	0.0120487	6.19997e-05	TRUE	DOWN
														TC0600001076.mm.2	Aldh1l1	-0.6825	0.0120487	6.22464e-05	TRUE	DOWN
														TC0400001970.mm.2	Slc2a5	-2.3775	0.0124643	6.62672e-05	TRUE	DOWN
														TC0500000836.mm.2	Afm	-1.4275	0.0125347	6.91868e-05	TRUE	DOWN
														TC1300000019.mm.2	Akr1c13	-2.0025	0.0125347	6.92185e-05	TRUE	DOWN
														TC1000003102.mm.2	Slc26a10	-1.52	0.0125347	6.94305e-05	TRUE	DOWN
														TC0400001305.mm.2	Hyi	-1.84	0.0126172	7.04555e-05	TRUE	DOWN
														TC1600001548.mm.2	Pdia5	-1.305	0.0126812	7.1384e-05	TRUE	DOWN
														TC1700002534.mm.2	Dpy30	-0.8575	0.0128594	7.41509e-05	TRUE	DOWN
														TC0300003173.mm.2	Acadm	-2.355	0.0128594	7.64465e-05	TRUE	DOWN
														TC1200000183.mm.2	Iah1	-1.315	0.0128594	7.702e-05	TRUE	DOWN
														TC1500001944.mm.2	Cyp2d22	-1.99	0.0133478	8.11474e-05	TRUE	DOWN
														TC0600002460.mm.2	Thnsl2	-1.28	0.0136542	8.48547e-05	TRUE	DOWN
														TC1900000249.mm.2	Gm4952	-3.9375	0.0137115	8.58283e-05	TRUE	DOWN
														TC0300001554.mm.2	Cryz	-0.935	0.0140921	8.94801e-05	TRUE	DOWN
														TC0600001279.mm.2	Pparg	-3.02	0.0141697	9.12488e-05	TRUE	DOWN
														TC1900000254.mm.2	Keg1	-5.41	0.0141799	9.25912e-05	TRUE	DOWN
														TC1400002090.mm.2	Emc9	-1.4725	0.0148381	9.88939e-05	TRUE	DOWN
														TC0600002486.mm.2	Rnf181	-1.14	0.0149118	0.000101091	TRUE	DOWN
														TC1500001136.mm.2	Ghr	-1.015	0.0149118	0.000101498	TRUE	DOWN
														TC1500000760.mm.2	Cyp2d12	-2.4875	0.0149118	0.000101552	TRUE	DOWN
														TC0600001082.mm.2	Hdac11	-1.3975	0.0149118	0.000102071	TRUE	DOWN
														TC0900001048.mm.2	Gsta4	-2.1025	0.0156177	0.00010831	TRUE	DOWN
														TC0100002965.mm.2	Steap3	-1.3325	0.0156749	0.000109724	TRUE	DOWN
														TC0X00003313.mm.2	Syap1	-1.055	0.0156749	0.000110751	TRUE	DOWN
														TC1800000890.mm.2	Cyb5a	-0.965	0.0159365	0.000113391	TRUE	DOWN
														TC1400002231.mm.2	Msra	-0.73	0.0161282	0.000116208	TRUE	DOWN
														TC0700004494.mm.2	Echs1	-0.7425	0.0163785	0.000120929	TRUE	DOWN
														TC0400003097.mm.2	Cyp2j6	-1.51	0.0165541	0.000123749	TRUE	DOWN
														TC0400003234.mm.2	Scp2	-3.1825	0.0165581	0.000124525	TRUE	DOWN
														TC0300000484.mm.2	Sucnr1	-3.9025	0.0165694	0.000125356	TRUE	DOWN
														TC1300002176.mm.2	Fbp1	-1.425	0.0168766	0.0001292	TRUE	DOWN
														TC0900002712.mm.2	Fbxo9	-0.835	0.0169157	0.000130261	TRUE	DOWN
														TC0600002616.mm.2	Gm4477	-2.1625	0.0169207	0.000131062	TRUE	DOWN
														TC0500002343.mm.2	Qdpr	-0.7975	0.0169531	0.000132076	TRUE	DOWN
														TC0700000514.mm.2	Ech1	-1.4375	0.0170012	0.000133217	TRUE	DOWN
														TC1500000207.mm.2	Cmbl	-1.61	0.017573	0.000138489	TRUE	DOWN
														TC1600001559.mm.2	Fam162a	-0.9125	0.0178074	0.000142741	TRUE	DOWN
														TC0300001244.mm.2	Gclm	-1.3475	0.0179092	0.000144364	TRUE	DOWN
														TC1000002645.mm.2	Chpt1	-2.15	0.0179354	0.000149242	TRUE	DOWN
														TC1100002324.mm.2	Ugp2	-1.425	0.0179354	0.000149421	TRUE	DOWN
														TC1400001537.mm.2	Anxa7	-1.4525	0.018183	0.000152303	TRUE	DOWN
														TC0900002604.mm.2	Aqp9	-1.28	0.0184432	0.000155662	TRUE	DOWN
														TC0700001715.mm.2	Acsm3	-1.07	0.0184432	0.000156144	TRUE	DOWN
														TC0600003598.mm.2	Cml3	-2.175	0.0190195	0.000166162	TRUE	DOWN
														TC0200002277.mm.2	Csnk2a1	-0.775	0.0191761	0.000170104	TRUE	DOWN
														TC1700000693.mm.2	Psors1c2	-0.755	0.0194599	0.000173514	TRUE	DOWN
														TC1000000713.mm.2	Upb1	-2.5025	0.0198476	0.000178759	TRUE	DOWN
														TC1000002374.mm.2	Gucd1	-1.4425	0.0198539	0.000181696	TRUE	DOWN
														TC1600001316.mm.2	Comt	-0.805	0.0203369	0.000189577	TRUE	DOWN
														TC0100002601.mm.2	Abcb6	-1.565	0.0209385	0.000198068	TRUE	DOWN
														TC1500001832.mm.2	Tmprss6	-0.83	0.0210576	0.000201036	TRUE	DOWN
														TC1000000386.mm.2	Sec63	-1.1125	0.0211458	0.000202881	TRUE	DOWN
														TC0900001295.mm.2	Ryk	-0.7	0.0212824	0.000206058	TRUE	DOWN
														TC0200000641.mm.2	Dab2ip	-0.8325	0.0217878	0.000211932	TRUE	DOWN
														TC1800000468.mm.2	Kcnn2	-1.695	0.0217952	0.000212986	TRUE	DOWN
														TC0800002594.mm.2	Gcdh	-1.265	0.0219415	0.000216392	TRUE	DOWN
														TC0300000180.mm.2	Slc2a2	-0.725	0.0220463	0.000218417	TRUE	DOWN
														TC1100004107.mm.2	Acox1	-1.58	0.0222575	0.000223517	TRUE	DOWN
														TC0900002719.mm.2	Gsta2	-6.075	0.0223067	0.000225016	TRUE	DOWN
														TC0200003109.mm.2	Hnmt	-2.0725	0.0223214	0.000227741	TRUE	DOWN
														TC1500000014.mm.2	C6	-4.875	0.0224629	0.000230638	TRUE	DOWN
														TC1100003999.mm.2	Abca8a	-5.84	0.0226144	0.000233411	TRUE	DOWN
														TC0X00001651.mm.2	Rbbp7	-0.6725	0.0226144	0.00023423	TRUE	DOWN
														TC0300000491.mm.2	P2ry1	-1.365	0.0227589	0.000241795	TRUE	DOWN
														TC1400001655.mm.2	Il17rb	-3.3425	0.0227589	0.000243409	TRUE	DOWN
														TC1500000022.mm.2	Ttc33	-0.91	0.0227589	0.000245976	TRUE	DOWN
														TC1500000578.mm.2	Gm19945	-0.775	0.0228389	0.000248897	TRUE	DOWN
														TC0X00000471.mm.2	Hprt	-0.7775	0.0228771	0.000250344	TRUE	DOWN
														TC1500001955.mm.2	Cyp2d40	-0.8225	0.0231328	0.000260448	TRUE	DOWN
														TC1800001081.mm.2	Rprd1a	-0.725	0.0231328	0.000262095	TRUE	DOWN
														TC0800002705.mm.2	Ces1f	-2.965	0.0231328	0.000262518	TRUE	DOWN
														TC0100001622.mm.2	Crp	-0.77	0.023133	0.000264177	TRUE	DOWN
														TC0600000902.mm.2	Eva1a	-0.825	0.0232898	0.000267924	TRUE	DOWN
														TC1300001670.mm.2	Aldh5a1	-1.2025	0.023379	0.000270576	TRUE	DOWN
														TC1300000020.mm.2	Akr1c19	-2.39	0.0241825	0.000283358	TRUE	DOWN
														TC1400002281.mm.2	Bnip3l	-0.7725	0.0242628	0.000287668	TRUE	DOWN
														TC1500000713.mm.2	Sgsm3	-0.87	0.0242628	0.000288453	TRUE	DOWN
														TC0800003249.mm.2	Emc8	-0.905	0.0254878	0.000306459	TRUE	DOWN
														TC1500000072.mm.2	Ugt3a1	-4.9325	0.0256243	0.000312768	TRUE	DOWN
														TC0700001669.mm.2	Pde3b	-0.6225	0.0256243	0.000314003	TRUE	DOWN
														TC1100004228.mm.2	Dcxr	-0.91	0.0256243	0.000314842	TRUE	DOWN
														TC0600003314.mm.2	Hebp1	-1.1175	0.0256243	0.00031652	TRUE	DOWN
														TC0800002706.mm.2	Ces1g	-2.5625	0.0256243	0.000317332	TRUE	DOWN
														TC0500003194.mm.2	Acad12	-1.2775	0.0260185	0.000323386	TRUE	DOWN
														TC0200000037.mm.2	Phyh	-1.015	0.0260703	0.000328561	TRUE	DOWN
														TC1500001395.mm.2	Ncald; Gm15941	-1.5575	0.0260703	0.0003318	TRUE	DOWN
														TC1000000131.mm.2	Nhsl1	-0.705	0.0260703	0.000332248	TRUE	DOWN
														TC0100001607.mm.2	Dcaf8	-0.6275	0.0262178	0.000336489	TRUE	DOWN
														TC0400002606.mm.2	Gabbr2	-2.7075	0.0262595	0.00033939	TRUE	DOWN
														TC0700001615.mm.2	Akip1	-1.1775	0.0262866	0.000341872	TRUE	DOWN
														TC0400003073.mm.2	Plaa	-0.63	0.0262866	0.000342107	TRUE	DOWN
														TC0900002969.mm.2	Cdv3	-0.82	0.0263991	0.00034476	TRUE	DOWN
														TC1700000832.mm.2	Adgrf1	-4.69	0.0264906	0.000347148	TRUE	DOWN
														TC0600001374.mm.2	Mug2	-1.7225	0.026739	0.000353204	TRUE	DOWN
														TC0900000664.mm.2	Ireb2	-1.51	0.026739	0.000355317	TRUE	DOWN
														TC0300001413.mm.2	Adh6-ps1	-4.07	0.027107	0.000365498	TRUE	DOWN
														TC1700001209.mm.2	Galm	-1.145	0.027107	0.000366384	TRUE	DOWN
														TC1300002445.mm.2	Scamp1	-1.5	0.027107	0.000367433	TRUE	DOWN
														TC0400001743.mm.2	Akr7a5	-1.585	0.0275573	0.000374778	TRUE	DOWN
														TC1000002943.mm.2	Slc35e3	-1.43	0.0276383	0.000379612	TRUE	DOWN
														TC1800001461.mm.2	Fech	-1.3375	0.0279419	0.000385041	TRUE	DOWN
														TC0500000837.mm.2	5830473C10Rik	-2.4725	0.0289562	0.000412804	TRUE	DOWN
														TC0100000386.mm.2	Ormdl1	-1.5175	0.0289562	0.000413445	TRUE	DOWN
														TC0700001252.mm.2	Nox4	-5.2475	0.0289981	0.000416571	TRUE	DOWN
														TC1900001445.mm.2	Ppp1r3c	-8.755	0.029374	0.000424618	TRUE	DOWN
														TC1200000798.mm.2	Acot1	-4.3225	0.0298187	0.000443241	TRUE	DOWN
														TC1900000046.mm.2	Ctsf	-0.655	0.0298187	0.000445241	TRUE	DOWN
														TC0200001773.mm.2	Chp1	-1.12	0.0302915	0.000458366	TRUE	DOWN
														TC0700002880.mm.2	Pop4	-0.8825	0.0302915	0.000460454	TRUE	DOWN
														TC1300002013.mm.2	Nfil3	-1.785	0.0302915	0.000463187	TRUE	DOWN
														TC0100002063.mm.2	Ogfrl1	-0.725	0.030442	0.000473211	TRUE	DOWN
														TC1000002493.mm.2	Gamt	-1.12	0.030442	0.000474859	TRUE	DOWN
														TC0200002476.mm.2	Sgk2	-1.7175	0.030442	0.00047615	TRUE	DOWN
														TC1400001047.mm.2	Esd	-1.05	0.030442	0.000477112	TRUE	DOWN
														TC0600000711.mm.2	Abcg2	-2.5	0.030442	0.000478441	TRUE	DOWN
														TC0900001038.mm.2	Gclc	-1.86	0.0306076	0.000485672	TRUE	DOWN
														TC0800001323.mm.2	Cog4	-0.83	0.0306076	0.000487935	TRUE	DOWN
														TC1100000053.mm.2	Nipsnap1	-0.9625	0.0308059	0.000500808	TRUE	DOWN
														TC0800000394.mm.2	Gsr	-1.5575	0.031087	0.000506777	TRUE	DOWN
														TC0400001881.mm.2	Gm13251	-1.6375	0.0312441	0.000517424	TRUE	DOWN
														TC0900000835.mm.2	Clpx	-1.4875	0.0312441	0.00051951	TRUE	DOWN
														TC0300000309.mm.2	3110057O12Rik; Gm2011	-0.695	0.0312441	0.000520594	TRUE	DOWN
														TC1000003119.mm.2	Lrp1	-0.66	0.0314058	0.000524703	TRUE	DOWN
														TC1900000124.mm.2	Trmt112	-0.9	0.031543	0.000528415	TRUE	DOWN
														TC0X00002556.mm.2	Gk	-0.8225	0.0317747	0.000536589	TRUE	DOWN
														TC0600002607.mm.2	Sfxn5	-1.04	0.0318031	0.000538502	TRUE	DOWN
														TC1200000142.mm.2	Odc1	-0.8425	0.0321108	0.000545158	TRUE	DOWN
														TC1800000884.mm.2	Zadh2	-0.95	0.0324633	0.000552638	TRUE	DOWN
														TC0300003245.mm.2	Gstm6	-1.6	0.0327101	0.000561224	TRUE	DOWN
														TC1200000675.mm.2	Mthfd1	-0.8025	0.0332775	0.000575455	TRUE	DOWN
														TC0600003345.mm.2	Slc15a5	-3.1825	0.0334968	0.000582419	TRUE	DOWN
														TC0700004657.mm.2	Sec11a	-0.715	0.0334968	0.000583689	TRUE	DOWN
														TC1700002333.mm.2	Lonp1	-1.0825	0.0340028	0.000595655	TRUE	DOWN
														TC0200003752.mm.2	Cir1	-0.91	0.0341057	0.000600529	TRUE	DOWN
														TC0600001515.mm.2	Clec2h	-3.4725	0.0341082	0.000603529	TRUE	DOWN
														TC0900001099.mm.2	Sh3bgrl2	-1.0275	0.0348967	0.000625322	TRUE	DOWN
														TC0400001034.mm.2	Ak4	-2.0575	0.0351368	0.000631343	TRUE	DOWN
														TC1500000221.mm.2	Sdc2	-1.6175	0.0357798	0.000647167	TRUE	DOWN
														TC1500001742.mm.2	Top1mt	-1.0675	0.0357798	0.000650773	TRUE	DOWN
														TC0200001843.mm.2	Sord	-0.845	0.0357798	0.000650952	TRUE	DOWN
														TC0400002713.mm.2	Epb41l4b	-1.4675	0.0365163	0.00066831	TRUE	DOWN
														TC0X00003346.mm.2	Rab9	-0.685	0.0365163	0.000669136	TRUE	DOWN
														TC0100003725.mm.2	Mia3	-0.935	0.0365163	0.000669285	TRUE	DOWN
														TC0700000564.mm.2	Prodh2	-0.9625	0.0369603	0.000682415	TRUE	DOWN
														TC0100003639.mm.2	Adss	-1.0125	0.0372669	0.000695484	TRUE	DOWN
														TC0100001234.mm.2	Kdm5b	-1.155	0.0372669	0.000696467	TRUE	DOWN
														TC1100001875.mm.2	Ttyh2	-0.83	0.0373469	0.000702806	TRUE	DOWN
														TC1500001945.mm.2	Cyp2d11; Mir7684	-2.79	0.0373469	0.000704505	TRUE	DOWN
														TC0700004474.mm.2	Bnip3	-1.565	0.0377511	0.000714907	TRUE	DOWN
														TC0200004953.mm.2	Ahcy; Gm4737	-0.6825	0.0377511	0.0007159	TRUE	DOWN
														TC1200001921.mm.2	Tmem30b	-1.33	0.0377511	0.000717418	TRUE	DOWN
														TC1400002266.mm.2	Ephx2	-1.5575	0.0377739	0.000719552	TRUE	DOWN
														TC0600001422.mm.2	C1ra	-0.7925	0.0379771	0.000725556	TRUE	DOWN
														TC0900000626.mm.2	Rdx	-0.6275	0.0381745	0.000734058	TRUE	DOWN
														TC1500001783.mm.2	Slc39a4	-3.465	0.0384998	0.000747248	TRUE	DOWN
														TC0X00000209.mm.2	Rgn	-0.8175	0.0388341	0.000755487	TRUE	DOWN
														TC1100003222.mm.2	Serpinf1	-0.605	0.0388476	0.000757499	TRUE	DOWN
														TC1300001178.mm.2	Srek1ip1	-0.825	0.0396638	0.000779799	TRUE	DOWN
														TC0500000623.mm.2	N4bp2	-0.85	0.0396638	0.000780558	TRUE	DOWN
														TC0600003108.mm.2	C1s1	-0.87	0.0398973	0.000786951	TRUE	DOWN
														TSUnmapped00000008.mm.2	44256	-1.0325	0.040103	0.000799779	TRUE	DOWN
														TC0500002695.mm.2	Ugt2a3	-0.7375	0.040103	0.000799938	TRUE	DOWN
														TC1800000590.mm.2	Isoc1	-0.715	0.040103	0.000800061	TRUE	DOWN
														TC0100003610.mm.2	Fh1	-0.835	0.040103	0.000800265	TRUE	DOWN
														TC1000002894.mm.2	Tbc1d15	-0.835	0.040103	0.000810956	TRUE	DOWN
														TC1900000763.mm.2	Pdcd4	-1.35	0.040103	0.000811664	TRUE	DOWN
														TC0X00001665.mm.2	Pir	-1.6975	0.040103	0.000813997	TRUE	DOWN
														TC0700000693.mm.2	1600014C10Rik	-1.71	0.040103	0.000814966	TRUE	DOWN
														TC1400000322.mm.2	Nt5dc2	-1.325	0.0405021	0.000835445	TRUE	DOWN
														TC1700002637.mm.2	Haao	-0.8275	0.0405021	0.000838681	TRUE	DOWN
														TC1900000206.mm.2	Vwce	-1.0975	0.0405021	0.000839104	TRUE	DOWN
														TC0400003423.mm.2	Ccdc30	-0.7725	0.0405021	0.000840987	TRUE	DOWN
														TC0300002688.mm.2	Cept1	-0.76	0.0405021	0.00084411	TRUE	DOWN
														TC0600001424.mm.2	C1rb	-0.945	0.040699	0.000850416	TRUE	DOWN
														TC0800001901.mm.2	Adam9	-0.5975	0.0409821	0.000858177	TRUE	DOWN
														TC1200002077.mm.2	Entpd5	-1.6975	0.0417601	0.000883556	TRUE	DOWN
														TC1300000162.mm.2	Gpx6	-1.99	0.0424957	0.000909996	TRUE	DOWN
														TC0400003849.mm.2	Mrto4	-0.79	0.0424957	0.000912875	TRUE	DOWN
														TC0900001921.mm.2	Dpy19l1	-1.425	0.0424957	0.000914103	TRUE	DOWN
														TC0500003124.mm.2	Suds3	-0.995	0.0426535	0.000928761	TRUE	DOWN
														TC0600000854.mm.2	Retsat	-2.2525	0.0426535	0.000928914	TRUE	DOWN
														TC0300002462.mm.2	Psmd4	-0.8175	0.0426535	0.000929845	TRUE	DOWN
														TC0400001990.mm.2	Errfi1	-2.06	0.0432243	0.000951845	TRUE	DOWN
														TC1500002056.mm.2	Arsa	-1.9	0.0436668	0.00096712	TRUE	DOWN
														TC0900001455.mm.2	Cspg5	-1.185	0.0437533	0.000974125	TRUE	DOWN
														TC0900000669.mm.2	Ube2q2	-0.9	0.0446595	0.00100758	TRUE	DOWN
														TC1900000040.mm.2	Pcx	-0.8325	0.0447483	0.00101765	TRUE	DOWN
														TC0200001150.mm.2	Ube2e3	-0.9	0.0450515	0.00102728	TRUE	DOWN
														TC0900002537.mm.2	Lactb	-1.07	0.0450515	0.00103374	TRUE	DOWN
														TC1900000749.mm.2	Mxi1	-1.0125	0.0450515	0.00103469	TRUE	DOWN
														TC1400000135.mm.2	Thrb	-0.6	0.0450867	0.00103802	TRUE	DOWN
														TC0600001734.mm.2	Med21	-0.77	0.0450867	0.00104055	TRUE	DOWN
														TC0200002669.mm.2	Rtfdc1	-1.055	0.0450867	0.00104361	TRUE	DOWN
														TC0500000488.mm.2	Lap3	-1.2975	0.0450867	0.00104562	TRUE	DOWN
														TC1500002147.mm.2	Slc38a4	-0.5825	0.0450867	0.0010502	TRUE	DOWN
														TC1000000933.mm.2	Txnrd1	-0.745	0.0450867	0.0010509	TRUE	DOWN
														TC0900001049.mm.2	Gm3776; Gsta1	-4.425	0.0450867	0.00105199	TRUE	DOWN
														TC1000003114.mm.2	Inhbe	-2.575	0.0450867	0.00105565	TRUE	DOWN
														TC0600001678.mm.2	Pyroxd1	-0.6475	0.0453134	0.00107111	TRUE	DOWN
														TC0900003234.mm.2	Acaa1b	-1.93	0.0458317	0.00108976	TRUE	DOWN
														TC1700001299.mm.2	Epas1	-0.76	0.045832	0.00109389	TRUE	DOWN
														TC0500002183.mm.2	Fndc4	-1.0875	0.046041	0.00110095	TRUE	DOWN
														TC1200002078.mm.2	Aldh6a1	-0.6275	0.0463048	0.00111352	TRUE	DOWN
														TC0400001223.mm.2	Cyp4a12b	-10.4775	0.0464583	0.0011193	TRUE	DOWN
														TC0800000972.mm.2	Dnase2a; Gm38426	-0.94	0.046789	0.00113454	TRUE	DOWN
														TC1400002310.mm.2	Slc25a37	-1.53	0.046789	0.0011357	TRUE	DOWN
														TC0500000740.mm.2	Polr2b	-1.105	0.0468848	0.00114224	TRUE	DOWN
														TC0900002820.mm.2	Morf4l1	-0.6925	0.0480407	0.00119479	TRUE	DOWN
														TC1800001366.mm.2	Aldh7a1	-1.475	0.0480407	0.00119682	TRUE	DOWN
														TC0800002852.mm.2	Esrp2	-0.7475	0.0480407	0.00119716	TRUE	DOWN
														TC1100000967.mm.2	Rabep1	-0.635	0.0480407	0.00121146	TRUE	DOWN
														TC1600001047.mm.2	Dopey2	-1.5975	0.0481238	0.00122037	TRUE	DOWN
														TC0400002244.mm.2	Decr1	-0.715	0.0481238	0.00122206	TRUE	DOWN
														TC0400001221.mm.2	Cyp4a12a	-10.7925	0.0481872	0.00122749	TRUE	DOWN
														TC0700002023.mm.2	Cyp2e1	-1.9	0.0481872	0.00122822	TRUE	DOWN
														TC0300002702.mm.2	Prok1	-2.1475	0.0487316	0.00124931	TRUE	DOWN
														TC0800002950.mm.2	Ldhd	-1.85	0.0487316	0.00125088	TRUE	DOWN
														TC0600003374.mm.2	Gys2	-1.585	0.0487568	0.00125372	TRUE	DOWN
														TC0200001859.mm.2	Sqrdl	-1.275	0.0487644	0.00125611	TRUE	DOWN
														TC0200002136.mm.2	Dstn	-0.9025	0.0487902	0.00125897	TRUE	DOWN
														TC1800000794.mm.2	Acaa2	-0.6975	0.0488814	0.00126353	TRUE	DOWN
														TC1200000614.mm.2	Daam1	-0.8825	0.049211	0.00128943	TRUE	DOWN
														TC0100002332.mm.2	Pms1	-1.4325	0.049211	0.00129072	TRUE	DOWN
														TC0800001196.mm.2	Ces2e	-1.2925	0.049211	0.00129091	TRUE	DOWN
														TC1700000567.mm.2	Cyp4f15	-1.3175	0.049211	0.00129158	TRUE	DOWN
														TC0100003483.mm.2	Mgst3	-3.0575	0.049211	0.00129483	TRUE	DOWN
														TC0700004176.mm.2	Gde1	-1.085	0.049211	0.00129697	TRUE	DOWN
														TC0600003468.mm.2	Ipo8	-0.6775	0.049211	0.0012982	TRUE	DOWN
														TC0100001207.mm.2	Etnk2	-0.785	0.049211	0.00129864	TRUE	DOWN
														TC0700001870.mm.2	Kat8	-0.635	0.0493438	0.00130576	TRUE	DOWN
														TC1700001877.mm.2	Angptl4	-2.06	0.0493438	0.00130691	TRUE	DOWN
														TC0600003105.mm.2	Pex5	-0.94	0.0493438	0.00130881	TRUE	DOWN
														TC1900000343.mm.2	Gm3443	-0.61	0.0497528	0.00132414	TRUE	DOWN
														TC0500001462.mm.2	Bri3bp	-0.72	0.0500316	0.00133603	TRUE	DOWN
														TC0300002561.mm.2	Hsd3b6	-1.2675	0.050074	0.00134622	TRUE	DOWN
														TC0400002238.mm.2	Necab1	-1.41	0.0501495	0.00135837	TRUE	DOWN
														TC0300002344.mm.2	Efna1	-1.39	0.0501495	0.00136368	TRUE	DOWN
														TC1100003634.mm.2	Lrrc46	-1.065	0.0501495	0.00137071	TRUE	DOWN
														TC1800001122.mm.2	Proc	-1.055	0.0501495	0.00137076	TRUE	DOWN
														TC1400002757.mm.2	Tmtc4	-0.645	0.0501495	0.00137309	TRUE	DOWN
														TC1000002422.mm.2	Fam207a	-1.2825	0.0502663	0.00138002	TRUE	DOWN
														TC0900001297.mm.2	Slco2a1	-2.4175	0.0502663	0.00138137	TRUE	DOWN
														TC0400004198.mm.2	Gm13139; Znf41-ps	-1.2625	0.0504722	0.00139159	TRUE	DOWN
														TC1100000588.mm.2	Skp1a	-0.635	0.0504722	0.00139557	TRUE	DOWN
														TC0300002725.mm.2	Gstm1	-0.9075	0.0505499	0.00140416	TRUE	DOWN
														TC0300001414.mm.2	Adh4	-4.0725	0.0505499	0.00140511	TRUE	DOWN
														TC1500002181.mm.2	Adcy6	-0.795	0.0505499	0.00140824	TRUE	DOWN
														TC0600002783.mm.2	Suclg2	-0.945	0.0505499	0.00141577	TRUE	DOWN
														TC0400004088.mm.2	Zbtb48	-0.6275	0.0505499	0.00141635	TRUE	DOWN
														TC0700001343.mm.2	Nars2	-1.46	0.0505499	0.00141987	TRUE	DOWN
														TC1800000401.mm.2	Ndfip1	-0.675	0.0515911	0.00145671	TRUE	DOWN
														TC0100003186.mm.2	Cfhr1	-1.24	0.0524455	0.00148801	TRUE	DOWN
														TC0900000561.mm.2	Apoa5	-1.175	0.0524455	0.0014989	TRUE	DOWN
														TC1400001306.mm.2	Rap2a	-1.4625	0.0524455	0.00150164	TRUE	DOWN
														TC0600002070.mm.2	Mtpn	-0.5975	0.0524694	0.00150986	TRUE	DOWN
														TC1300001494.mm.2	Sugct	-1.43	0.0525251	0.00151383	TRUE	DOWN
														TC1100003934.mm.2	Polg2	-0.785	0.0526364	0.00152178	TRUE	DOWN
														TC0400002444.mm.2	Aptx	-0.9525	0.0531593	0.00154886	TRUE	DOWN
														TC1800000762.mm.2	Mbd2	-0.8825	0.053204	0.0015571	TRUE	DOWN
														TC1100003928.mm.2	Tex2	-0.9175	0.053204	0.00155735	TRUE	DOWN
														TC0500001590.mm.2	Hspb1	-3.0675	0.0534481	0.00156841	TRUE	DOWN
														TC1700002354.mm.2	Gpr108	-0.9025	0.0534481	0.00157251	TRUE	DOWN
														TC0300000555.mm.2	Mfsd1	-0.8575	0.0535452	0.0015794	TRUE	DOWN
														TC1000001147.mm.2	Nr2c1	-0.98	0.0540381	0.0015988	TRUE	DOWN
														TC0800003060.mm.2	Car5a	-0.6475	0.0542806	0.00161087	TRUE	DOWN
														TC0800002702.mm.2	Ces1d	-1.0075	0.0550646	0.00164901	TRUE	DOWN
														TC1300000359.mm.2	Wrnip1	-1.3075	0.0551462	0.00165394	TRUE	DOWN
														TC0600002351.mm.2	Ppm1k	-1.8425	0.0560533	0.00168872	TRUE	DOWN
														TC0800000120.mm.2	Cul4a	-0.865	0.0561704	0.00169478	TRUE	DOWN
														TC0200004550.mm.2	Ciao1	-0.7825	0.0566595	0.00172266	TRUE	DOWN
														TC0800001133.mm.2	Mmp15	-1.5375	0.0566595	0.00172739	TRUE	DOWN
														TC1100002107.mm.2	Sec14l2	-0.7025	0.0570067	0.00174311	TRUE	DOWN
														TC0800002066.mm.2	Dlc1	-0.74	0.0572974	0.00176062	TRUE	DOWN
														TC0200005220.mm.2	Atp9a	-1.2225	0.057464	0.00177262	TRUE	DOWN
														TC0400001801.mm.2	Casp9	-0.89	0.0574683	0.00177705	TRUE	DOWN
														TC1900000567.mm.2	Cyp2c37	-1.51	0.0574683	0.00177793	TRUE	DOWN
														TC1500001531.mm.2	Enpp2	-2.755	0.0574817	0.00178117	TRUE	DOWN
														TC0800001531.mm.2	Rhou	-0.76	0.0578502	0.00180277	TRUE	DOWN
														TC0600001813.mm.2	Slc25a13	-1.53	0.0578701	0.00181171	TRUE	DOWN
														TC1000002917.mm.2	Gm10271	-0.6375	0.0578701	0.00181875	TRUE	DOWN
														TC0300000689.mm.2	Cd1d2	-1.35	0.0578701	0.00181992	TRUE	DOWN
														TC0700003581.mm.2	Idh2	-1.55	0.0578701	0.00182154	TRUE	DOWN
														TC1400000777.mm.2	Dhrs4	-1.225	0.0582036	0.00183479	TRUE	DOWN
														TC0700002096.mm.2	Slc22a18	-0.9575	0.0582036	0.00184262	TRUE	DOWN
														TC0700001940.mm.2	Fam175b	-0.7275	0.0582903	0.00184799	TRUE	DOWN
														TC1700000354.mm.2	Hagh	-0.645	0.0584458	0.00185555	TRUE	DOWN
														TC0200002830.mm.2	Prpf6	-0.985	0.058634	0.00188142	TRUE	DOWN
														TC0X00000398.mm.2	Stag2	-0.7175	0.0587027	0.00189025	TRUE	DOWN
														TC0900000848.mm.2	Rbpms2	-0.76	0.0587726	0.001904	TRUE	DOWN
														TC1000000596.mm.2	Pbld1	-1.835	0.0587726	0.00191102	TRUE	DOWN
														TC1200001874.mm.2	L2hgdh	-1.0075	0.0593488	0.00194775	TRUE	DOWN
														TC0100001726.mm.2	9130409I23Rik	-1.8975	0.0593488	0.0019552	TRUE	DOWN
														TC0200005092.mm.2	Hnf4aos	-1.8875	0.0593488	0.00196072	TRUE	DOWN
														TC0900000181.mm.2	A230050P20Rik	-0.9925	0.0593488	0.00196119	TRUE	DOWN
														TC0700004409.mm.2	Oat	-3.7125	0.0593488	0.00196172	TRUE	DOWN
														TC0300002241.mm.2	Mnd1	-0.765	0.0593625	0.00197067	TRUE	DOWN
														TC0300001176.mm.2	Olfm3	-1.7325	0.0593625	0.00197417	TRUE	DOWN
														TC0700000917.mm.2	Gas2	-2.2325	0.0593625	0.00197554	TRUE	DOWN
														TC0100000422.mm.2	9430016H08Rik	-0.8275	0.0595152	0.00198866	TRUE	DOWN
														TC0700002857.mm.2	Dpy19l3	-3.5175	0.0597996	0.00200729	TRUE	DOWN
														TC1300002201.mm.2	Aaed1	-0.9625	0.0597996	0.00201062	TRUE	DOWN
														TC1500001946.mm.2	Cyp2d10	-1.2575	0.0602569	0.00203516	TRUE	DOWN
														TC0500000819.mm.2	Slc4a4	-0.94	0.0605635	0.00205497	TRUE	DOWN
														TC1900001729.mm.2	Shtn1	-0.85	0.0605635	0.00205616	TRUE	DOWN
														TC1700001856.mm.2	Cyp4f14	-0.9525	0.0605635	0.00205642	TRUE	DOWN
														TC0500001936.mm.2	Crot	-1.88	0.0607504	0.00206647	TRUE	DOWN
														TC0800000482.mm.2	Slc7a2	-1.7	0.0607504	0.00206824	TRUE	DOWN
														TC0300002453.mm.2	Cgn	-1.44	0.0611766	0.00208826	TRUE	DOWN
														TC1100003207.mm.2	Srr	-0.965	0.061313	0.00209567	TRUE	DOWN
														TC0100002831.mm.2	Mterf4	-1.2725	0.0613342	0.00210192	TRUE	DOWN
														TC1900001336.mm.2	Ak3	-0.68	0.0613923	0.00211221	TRUE	DOWN
														TC1500001214.mm.2	Tars	-0.6325	0.0622133	0.00214875	TRUE	DOWN
														TC1500001953.mm.2	Cyp2d13	-2.555	0.0622133	0.00215656	TRUE	DOWN
														TC1200000978.mm.2	Ttc8	-1.02	0.0622133	0.00215929	TRUE	DOWN
														TC0400001010.mm.2	Pgm2	-0.8875	0.0623269	0.00216682	TRUE	DOWN
														TC0400000867.mm.2	Rraga	-0.705	0.0635424	0.00222663	TRUE	DOWN
														TC0200004690.mm.2	Hao1	-2.095	0.0638631	0.00224611	TRUE	DOWN
														TC0400003386.mm.2	Ptprf	-0.76	0.0648092	0.00229664	TRUE	DOWN
														TC0500003489.mm.2	Cox19	-1.2325	0.0648092	0.00232314	TRUE	DOWN
														TC0100003738.mm.2	44256	-0.8825	0.0648092	0.00232607	TRUE	DOWN
														TC1100002170.mm.2	H2afv	-1.0725	0.0649602	0.0023432	TRUE	DOWN
														TC1500000568.mm.2	Zfp707	-2.05	0.0649712	0.00235316	TRUE	DOWN
														TC1400000530.mm.2	Tmem260	-0.75	0.0649712	0.00235895	TRUE	DOWN
														TC0200004241.mm.2	Hipk3; Mir1902	-0.8125	0.0649712	0.00236171	TRUE	DOWN
														TC0500002154.mm.2	Hadha	-0.58	0.0649712	0.00236414	TRUE	DOWN
														TC0500001741.mm.2	Eif2ak1	-0.9625	0.0649712	0.00236638	TRUE	DOWN
														TC1400000173.mm.2	Chchd1	-0.6725	0.0649712	0.00236891	TRUE	DOWN
														TC0X00000396.mm.2	Xiap	-0.9	0.0649712	0.00237259	TRUE	DOWN
														TC1100004232.mm.2	Dus1l	-1.09	0.0649712	0.00237286	TRUE	DOWN
														TC0500001297.mm.2	Wsb2	-0.91	0.0651034	0.00238322	TRUE	DOWN
														TC0100003739.mm.2	44257	-1.19	0.0651034	0.00238417	TRUE	DOWN
														TC0200001047.mm.2	Pdk1	-1.1175	0.0651681	0.00239231	TRUE	DOWN
														TC0800001919.mm.2	Bag4	-0.98	0.0651681	0.00240059	TRUE	DOWN
														TC1300001794.mm.2	Eci2	-1.0825	0.0656106	0.00242422	TRUE	DOWN
														TC0300002357.mm.2	Il6ra	-1.9175	0.0660569	0.00245168	TRUE	DOWN
														TC0500003516.mm.2	Gna12	-1.0275	0.0660569	0.00245382	TRUE	DOWN
														TC1900001059.mm.2	Slc22a28	-1.3425	0.066296	0.00248095	TRUE	DOWN
														TC1500000805.mm.2	Atxn10	-0.9325	0.066902	0.0025217	TRUE	DOWN
														TC1100000859.mm.2	Gas7	-1.315	0.0671375	0.00253361	TRUE	DOWN
														TC1100002451.mm.2	Chac2	-1.0225	0.0681704	0.00259807	TRUE	DOWN
														TC1100000592.mm.2	Vdac1	-0.77	0.0681704	0.00260021	TRUE	DOWN
														TC0500000176.mm.2	Pmpcb	-0.64	0.0684461	0.00261689	TRUE	DOWN
														TC0500002065.mm.2	Tomm7	-0.5875	0.0687174	0.00263036	TRUE	DOWN
														TC1900000684.mm.2	Elovl3	-3.63	0.0688438	0.00264241	TRUE	DOWN
														TC0900001050.mm.2	Gm10639	-2.655	0.0694022	0.00267338	TRUE	DOWN
														TC0500003088.mm.2	Acads	-0.9075	0.0694022	0.0026812	TRUE	DOWN
														TC0200003214.mm.2	Sardh	-0.9925	0.0694022	0.00268366	TRUE	DOWN
														TC1500001040.mm.2	Mettl7a1	-0.9525	0.0694022	0.0026847	TRUE	DOWN
														TC0400004058.mm.2	H6pd	-1.5275	0.0697159	0.00271063	TRUE	DOWN
														TC0200001761.mm.2	Gchfr	-1.3175	0.0711736	0.00281123	TRUE	DOWN
														TC1300002316.mm.2	Pdcd6	-0.9525	0.0711736	0.00281412	TRUE	DOWN
														TC0400001612.mm.2	Nr0b2	-2.265	0.0713212	0.00282399	TRUE	DOWN
														TC0500001302.mm.2	Fbxo21	-1.8375	0.0717286	0.00284963	TRUE	DOWN
														TC0300003103.mm.2	Dnase2b	-1.515	0.0717714	0.00286846	TRUE	DOWN
														TC1300000633.mm.2	Higd2a	-0.655	0.0717714	0.0028759	TRUE	DOWN
														TC0400000613.mm.2	Rad23b	-0.7075	0.0717714	0.00288556	TRUE	DOWN
														TC0700004509.mm.2	Sirt3	-1.605	0.0717714	0.00289115	TRUE	DOWN
														TC1000003228.mm.2	Bloc1s1	-0.6025	0.0717714	0.00289209	TRUE	DOWN
														TC1200000502.mm.2	Mia2	-0.595	0.0717714	0.00289594	TRUE	DOWN
														TC0500001570.mm.2	Cldn3	-1.065	0.0722247	0.00293049	TRUE	DOWN
														TC0700002720.mm.2	Spint2	-1.355	0.0723625	0.00293934	TRUE	DOWN
														TC1700000869.mm.2	Mrpl14	-1.3925	0.0725913	0.00295852	TRUE	DOWN
														TC0100001491.mm.2	Kifap3	-0.9275	0.0727714	0.00297401	TRUE	DOWN
														TC0500002881.mm.2	Hsd17b13	-1.0225	0.0727714	0.00297988	TRUE	DOWN
														TC1600000443.mm.2	Pcyt1a	-0.5925	0.0730023	0.00300478	TRUE	DOWN
														TC1700000842.mm.2	Enpp5	-1.1025	0.073728	0.003046	TRUE	DOWN
														TC1300000466.mm.2	Smim13	-1.4775	0.0737961	0.00305407	TRUE	DOWN
														TC1100000038.mm.2	Tbc1d10a	-0.8175	0.0739704	0.0030756	TRUE	DOWN
														TC1400002756.mm.2	Ggact	-1.1175	0.0739704	0.00307726	TRUE	DOWN
														TC0300002860.mm.2	Fnbp1l; Mir7657	-1.0225	0.0739704	0.00307899	TRUE	DOWN
														TC0700002808.mm.2	Gm4692	-0.9925	0.0739704	0.00308041	TRUE	DOWN
														TC1500002284.mm.2	Spryd3	-0.77	0.074106	0.00309406	TRUE	DOWN
														TC0900000833.mm.2	Parp16	-1.5325	0.075112	0.00318433	TRUE	DOWN
														TC0200002537.mm.2	Ctsa	-0.74	0.075112	0.00319817	TRUE	DOWN
														TC0400000304.mm.2	Akirin2	-0.7125	0.075112	0.00320297	TRUE	DOWN
														TC1000001298.mm.2	Nap1l1	-1.0975	0.075112	0.00320457	TRUE	DOWN
														TC1100000939.mm.2	Asgr1	-0.6225	0.075112	0.00320634	TRUE	DOWN
														TC1100003041.mm.2	Cyb5d1	-0.75	0.075112	0.00320662	TRUE	DOWN
														TC0900000254.mm.2	Thyn1	-1.07	0.0754736	0.00322641	TRUE	DOWN
														TC1700001621.mm.2	1600002H07Rik	-2.8675	0.0754736	0.00323323	TRUE	DOWN
														TC1900000140.mm.2	Atl3	-0.595	0.0754736	0.00323564	TRUE	DOWN
														TC0700001922.mm.2	Acadsb	-1.245	0.0762149	0.00328802	TRUE	DOWN
														TC0100001586.mm.2	Pfdn2	-0.915	0.0767165	0.00331607	TRUE	DOWN
														TC1600000089.mm.2	Abat	-0.595	0.0769789	0.00333832	TRUE	DOWN
														TC1000002604.mm.2	Mterf2	-1.11	0.0776373	0.00337386	TRUE	DOWN
														TC0100001526.mm.2	Creg1	-0.8725	0.077718	0.00338316	TRUE	DOWN
														TC0400003230.mm.2	Cpt2	-0.845	0.0780422	0.00340663	TRUE	DOWN
														TC0100002764.mm.2	Ngef	-0.8575	0.0780422	0.00341205	TRUE	DOWN
														TC1000001284.mm.2	Csrp2	-1.3475	0.0780422	0.00341254	TRUE	DOWN
														TC1900000212.mm.2	Prpf19	-0.735	0.0781934	0.00342268	TRUE	DOWN
														TC0300000482.mm.2	Aadac	-0.885	0.0786253	0.00344866	TRUE	DOWN
														TC1700001451.mm.2	Igf2r	-1.115	0.0790697	0.00347528	TRUE	DOWN
														TC1800000081.mm.2	Snrpd1	-0.78	0.0792319	0.00348954	TRUE	DOWN
														TC0600001672.mm.2	Slco1b2	-1.2575	0.0798939	0.00352949	TRUE	DOWN
														TC1300002036.mm.2	Nop16	-1.1525	0.0802624	0.00355308	TRUE	DOWN
														TC1700001644.mm.2	Fahd1	-1.4675	0.0810522	0.00360257	TRUE	DOWN
														TC0600003208.mm.2	BC048546	-1.6675	0.0810528	0.00360624	TRUE	DOWN
														TC0800002739.mm.2	Kifc3	-0.6525	0.082107	0.00367533	TRUE	DOWN
														TC0100001579.mm.2	Nr1i3	-1.7325	0.0823719	0.00369894	TRUE	DOWN
														TC1300002196.mm.2	Slc35d2	-1.295	0.0823719	0.00370576	TRUE	DOWN
														TC1100004294.mm.2	Glod4; Gemin4	-1.3025	0.0823719	0.00370596	TRUE	DOWN
														TC0400001387.mm.2	Trit1	-1.5075	0.0827766	0.00374267	TRUE	DOWN
														TC1700001847.mm.2	Zfp871	-0.8725	0.0827766	0.00374631	TRUE	DOWN
														TC0300000967.mm.2	Fmo5	-1.695	0.0833335	0.00378589	TRUE	DOWN
														TC0500003126.mm.2	Pebp1	-1.3	0.0837315	0.00382346	TRUE	DOWN
														TC1000002900.mm.2	Tmem19	-1.3525	0.0838788	0.00384664	TRUE	DOWN
														TC1100002664.mm.2	Sqstm1	-0.7075	0.0840144	0.00386362	TRUE	DOWN
														TC0600002492.mm.2	Tgoln1; Tgoln2	-1.175	0.084016	0.00387893	TRUE	DOWN
														TC0500003651.mm.2	Gm8615	-0.6675	0.084016	0.00387989	TRUE	DOWN
														TC1200002445.mm.2	Nudt14	-1.27	0.084016	0.00388564	TRUE	DOWN
														TC1500000580.mm.2	Grina	-0.815	0.0842691	0.00390493	TRUE	DOWN
														TC0600002644.mm.2	Anxa4	-0.685	0.0852385	0.00398804	TRUE	DOWN
														TC0900002292.mm.2	Fdx1	-0.945	0.0852385	0.00400208	TRUE	DOWN
														TC0900002718.mm.2	Gm8074	-2.2925	0.0852385	0.00400359	TRUE	DOWN
														TC1200001262.mm.2	Adssl1	-2.0075	0.0853405	0.00401364	TRUE	DOWN
														TC0100001123.mm.2	Acmsd	-1.4175	0.0860555	0.00408304	TRUE	DOWN
														TC1500001920.mm.2	St13	-0.795	0.0860555	0.00408695	TRUE	DOWN
														TC0200004634.mm.2	Ddrgk1	-0.825	0.0860555	0.0041006	TRUE	DOWN
														TC1000002358.mm.2	Cisd1	-0.9625	0.0866854	0.00414572	TRUE	DOWN
														TC0300002297.mm.2	Apoa1bp	-0.7075	0.086756	0.00415691	TRUE	DOWN
														TC0900002988.mm.2	Nudt16	-1.1825	0.0869331	0.00419833	TRUE	DOWN
														TC1000001480.mm.2	Llph	-0.72	0.0869331	0.0041987	TRUE	DOWN
														TC0800001490.mm.2	Ctu2	-0.7825	0.0869331	0.0042019	TRUE	DOWN
														TC1300001882.mm.2	Ranbp9	-0.6825	0.0869331	0.00420455	TRUE	DOWN
														TC1000002032.mm.2	BC021785; G630090E17Rik	-0.64	0.087406	0.00424738	TRUE	DOWN
														TC1700001852.mm.2	Zfp799	-0.8825	0.087406	0.00425091	TRUE	DOWN
														TC1200002017.mm.2	Gm4787	-0.7325	0.087406	0.00425502	TRUE	DOWN
														TC0300002558.mm.2	Hsd3b2	-3.9625	0.0876511	0.00427887	TRUE	DOWN
														TC1100000296.mm.2	Mtif2	-1.095	0.0876511	0.00428269	TRUE	DOWN
														TC0400000576.mm.2	Nipsnap3b	-0.6825	0.088229	0.00433684	TRUE	DOWN
														TC0900002601.mm.2	Lipc	-0.67	0.088229	0.00434187	TRUE	DOWN
														TC1800000103.mm.2	Lama3	-1.555	0.088781	0.00438987	TRUE	DOWN
														TC0800000276.mm.2	Mrps31	-0.775	0.0888479	0.00439718	TRUE	DOWN
														TC0200003624.mm.2	Dpp4	-0.815	0.0888668	0.00440212	TRUE	DOWN
														TC0300000580.mm.2	Ppm1l	-0.7125	0.0890019	0.00441282	TRUE	DOWN
														TC0600000758.mm.2	Smarcad1	-0.6025	0.089655	0.00445368	TRUE	DOWN
														TC1500000087.mm.2	Amacr	-0.6	0.089655	0.00446411	TRUE	DOWN
														TC0X00001784.mm.2	Pqbp1	-0.5925	0.089655	0.0044775	TRUE	DOWN
														TC1800000232.mm.2	Pik3c3	-0.595	0.0899877	0.00450627	TRUE	DOWN
														TC1100002225.mm.2	Ddc	-2.13	0.0902599	0.00452803	TRUE	DOWN
														TC0700003596.mm.2	Crtc3	-0.815	0.0904589	0.00455972	TRUE	DOWN
														TC0700000151.mm.2	Rps5	-0.6025	0.0904589	0.0045629	TRUE	DOWN
														TC1500001090.mm.2	Soat2	-0.8125	0.0904589	0.00456653	TRUE	DOWN
														TC0900001371.mm.2	Nprl2	-0.6825	0.0908101	0.00459983	TRUE	DOWN
														TC0700001939.mm.2	Lhpp	-1.7825	0.0908101	0.00460146	TRUE	DOWN
														TC1000001895.mm.2	Enpp3	-3.035	0.0908101	0.00460153	TRUE	DOWN
														TC0100001909.mm.2	Mrpl15	-0.915	0.0912378	0.00463872	TRUE	DOWN
														TC1100000940.mm.2	Asgr2	-1.26	0.0912791	0.00464864	TRUE	DOWN
														TC0300001415.mm.2	Adh5	-0.6075	0.0912791	0.00465315	TRUE	DOWN
														TC1000002586.mm.2	Appl2	-0.675	0.0914719	0.00467391	TRUE	DOWN
														TC1900000897.mm.2	Gstp2	-2.315	0.0914719	0.00467603	TRUE	DOWN
														TC0600000091.mm.2	Tmem106b	-0.7725	0.0916561	0.00469714	TRUE	DOWN
														TC0300002728.mm.2	Gstm4	-1.1125	0.0917033	0.00470656	TRUE	DOWN
														TC1300000383.mm.2	Nqo2	-1.0475	0.0917118	0.00471238	TRUE	DOWN
														TC0200003529.mm.2	Neb	-1.3825	0.0917487	0.0047308	TRUE	DOWN
														TC1500002109.mm.2	Adamts20	-0.835	0.0923855	0.00477612	TRUE	DOWN
														TC0500001499.mm.2	Ran	-0.6575	0.0925245	0.00478747	TRUE	DOWN
														TC1000003078.mm.2	Slc16a7	-2.3	0.0926747	0.00479942	TRUE	DOWN
														TC1500002328.mm.2	Agxt2	-1.93	0.0926832	0.00481145	TRUE	DOWN
														TC0600001271.mm.2	Atg7	-1.1175	0.0927114	0.00482995	TRUE	DOWN
														TC1500000659.mm.2	Nol12	-0.945	0.0927114	0.00483728	TRUE	DOWN
														TC0700002052.mm.2	Rplp2; Snora52	-0.775	0.0927114	0.0048403	TRUE	DOWN
														TC0800002799.mm.2	Cmtm4	-1.1825	0.0928816	0.00486728	TRUE	DOWN
														TC0100003825.mm.2	Gm3934	-3.175	0.0928816	0.00487144	TRUE	DOWN
														TC0X00000096.mm.2	B630019K06Rik	-1.0125	0.0928816	0.004879	TRUE	DOWN
														TC1800000347.mm.2	Zmat2	-0.61	0.0928816	0.00489791	TRUE	DOWN
														TC0400001509.mm.2	Ak2	-0.7175	0.0928816	0.00489949	TRUE	DOWN
														TC0400002516.mm.2	Stoml2	-0.715	0.092926	0.00491705	TRUE	DOWN
														TC0500002025.mm.2	Dnajc2	-1.175	0.0929786	0.00492979	TRUE	DOWN
														TC0500000876.mm.2	Fam47e	-1.5175	0.0929786	0.00494207	TRUE	DOWN
														TC0900000273.mm.2	Zbtb44	-1.1475	0.092981	0.00496668	TRUE	DOWN
														TC0300001255.mm.2	Sec24d	-1.2725	0.0929832	0.00498028	TRUE	DOWN
														TC0600001768.mm.2	Mettl20	-2.9875	0.0929945	0.00500368	TRUE	DOWN
														TC0500003371.mm.2	Gtf2ird1	-1.4525	0.0929945	0.00502278	TRUE	DOWN
														TC1200001364.mm.2	Fam228b	-0.96	0.0929945	0.00502725	TRUE	DOWN
														TC0500002760.mm.2	Scarb2	-0.59	0.0929945	0.00502865	TRUE	DOWN
														TC1800001431.mm.2	Ablim3	-1.5875	0.0929945	0.00502956	TRUE	DOWN
														TC0700001709.mm.2	Acsm5	-1.0525	0.0939988	0.00515161	TRUE	DOWN
														TC1000001654.mm.2	Olfr808	-0.9625	0.0941859	0.00516849	TRUE	DOWN
														TC0300001843.mm.2	Mccc1	-0.6925	0.0941859	0.0051738	TRUE	DOWN
														TC1100003505.mm.2	Akap1	-0.8975	0.0942133	0.00518033	TRUE	DOWN
														TC1100000760.mm.2	Mief2	-0.6375	0.0944778	0.00521005	TRUE	DOWN
														TC0600001810.mm.2	Pdk4	-1.76	0.0944778	0.00521189	TRUE	DOWN
														TC0500002592.mm.2	Ociad2	-2.915	0.0946397	0.00522508	TRUE	DOWN
														TC0200002879.mm.2	Cdc123	-0.61	0.0949419	0.00526171	TRUE	DOWN
														TC0500001210.mm.2	Iscu	-1.225	0.0952797	0.00530333	TRUE	DOWN
														TC0400004204.mm.2	Gm13152; Gm13139	-1.735	0.0961507	0.00537973	TRUE	DOWN
														TC0800001883.mm.2	Gpat4	-1.6775	0.0961507	0.00538212	TRUE	DOWN
														TC1000001531.mm.2	Lrig3	-0.92	0.0967656	0.00543754	TRUE	DOWN
														TC0300002611.mm.2	Slc22a15	-1.62	0.0967656	0.00543833	TRUE	DOWN
														TC1200001722.mm.2	Hectd1	-0.745	0.0968593	0.00544796	TRUE	DOWN
														TC0100001788.mm.2	Slc30a10	-0.6125	0.0969142	0.00545636	TRUE	DOWN
														TC1000002185.mm.2	Tbc1d32	-1.1525	0.0969142	0.0054628	TRUE	DOWN
														TC0600002326.mm.2	Inmt	-3.0125	0.0973379	0.00550993	TRUE	DOWN
														TC1100002567.mm.2	Pttg1	-0.7125	0.0973379	0.00551432	TRUE	DOWN
														TC0500000286.mm.2	Hadhb	-0.71	0.0974121	0.0055273	TRUE	DOWN
														TC1300000674.mm.2	Txndc15	-0.7075	0.0976661	0.00554611	TRUE	DOWN
														TC1700001289.mm.2	Prkce	-0.7425	0.0981252	0.00560969	TRUE	DOWN
														TC1700000939.mm.2	Oard1	-0.7675	0.0982168	0.00562672	TRUE	DOWN
														TC0100003679.mm.2	Ephx1	-1.45	0.0982758	0.00563827	TRUE	DOWN
														TC0200004042.mm.2	Olfr1221	-0.9625	0.0984959	0.0056561	TRUE	DOWN
														TC1100003161.mm.2	Aspa	-0.9075	0.0984959	0.00565977	TRUE	DOWN
														TC0600001308.mm.2	8430408G22Rik	-3.385	0.0987988	0.00570377	TRUE	DOWN
														TC0700004321.mm.2	Sephs2	-0.8275	0.0991995	0.00574706	TRUE	DOWN

## Sheet: Sheet 6
ID	Gene.Symbol	Fold Change	p value (FDR)	p value	Significance	Status
TC1300001377.mm.2	Akr1c18	11.7233	0.00161483	7.27206e-08	TRUE	UP
TC1400000292.mm.2	Lrtm1	3.41333	0.00202663	6.38856e-07	TRUE	UP
TC0900001726.mm.2	Cep126	7.41417	0.00274647	9.8945e-07	TRUE	UP
TC0500003596.mm.2	Cyp3a16	10.7175	0.0125629	8.34425e-06	TRUE	UP
TC1000001701.mm.2	Ginm1	2.33667	0.0125629	8.88275e-06	TRUE	UP
TC1900001612.mm.2	Cyp17a1	10.4	0.0125629	9.16472e-06	TRUE	UP
TC0100000847.mm.2	Spp2	2.26583	0.0268076	3.36511e-05	TRUE	UP
TC0100003889.mm.2	Mnda	2.53167	0.0268076	3.87066e-05	TRUE	UP
TC0300001641.mm.2	Fabp12	3.8475	0.0268076	4.02635e-05	TRUE	UP
TC1100003141.mm.2	Slc13a5	3.21333	0.0268076	4.10456e-05	TRUE	UP
TC0200001681.mm.2	Fmn1	0.9925	0.030355	5.39004e-05	TRUE	UP
TC1900000317.mm.2	Rfk	1.90667	0.030355	5.46305e-05	TRUE	UP
TC1000003226.mm.2	Gstt3	4.1675	0.0320871	6.21339e-05	TRUE	UP
TC1700000836.mm.2	Cyp39a1	3.21667	0.0342406	7.11329e-05	TRUE	UP
TC0100001632.mm.2	Pyhin1	2.64	0.0342406	7.3309e-05	TRUE	UP
TC1000001595.mm.2	Apof	1.0625	0.0342406	7.33583e-05	TRUE	UP
TC1000002929.mm.2	Lyz2	2.86333	0.0342406	7.696e-05	TRUE	UP
TC1200000279.mm.2	Nampt	1.6325	0.0347363	7.9778e-05	TRUE	UP
TC0800001112.mm.2	Cpne2	1.06083	0.0353678	8.42071e-05	TRUE	UP
TC0700000446.mm.2	Cyp2a12	1.20333	0.0364762	9.03445e-05	TRUE	UP
TC1100003326.mm.2	Evi2a; Evi2b; Gm21975	1.77667	0.037618	9.72638e-05	TRUE	UP
TC0900002533.mm.2	Rab8b	1.42583	0.037618	9.82546e-05	TRUE	UP
TC0400003215.mm.2	Mrpl37	0.93	0.0376216	0.000100753	TRUE	UP
TC1800000396.mm.2	Rnf14	1.05167	0.0376216	0.000102046	TRUE	UP
TC1200000225.mm.2	Cmpk2	2.1275	0.0376216	0.000103347	TRUE	UP
TC1500001728.mm.2	Ly6a	5.24583	0.0377451	0.000107495	TRUE	UP
TC0200003630.mm.2	Ifih1	3.04083	0.0377451	0.000108785	TRUE	UP
TC0900001128.mm.2	Nt5e	5.3725	0.0384193	0.000113288	TRUE	UP
TC1500001963.mm.2	Nfam1	2.0125	0.0384193	0.000114189	TRUE	UP
TC0600000362.mm.2	Trim24	4.02583	0.0390197	0.00011773	TRUE	UP
TC1100003300.mm.2	Tmem97	1.79333	0.0402987	0.000123404	TRUE	UP
TC0800000659.mm.2	Ddx60	2.67167	0.0420309	0.000134387	TRUE	UP
TC1000002383.mm.2	Gstt1	2.82917	0.0422883	0.000137114	TRUE	UP
TC1800001175.mm.2	Slc23a1	2.39667	0.0449936	0.000150647	TRUE	UP
TC1400001906.mm.2	Ddhd1; Mir5131	3.18083	0.0449936	0.000153991	TRUE	UP
TC0400003794.mm.2	C1qa	1.87583	0.045976	0.000170923	TRUE	UP
TC1200002269.mm.2	Ifi27l2a	1.55833	0.045976	0.000176993	TRUE	UP
TC1900000467.mm.2	Papss2	3.25583	0.045976	0.000183482	TRUE	UP
TC1800001396.mm.2	Gm4841	1.34	0.045976	0.000184257	TRUE	UP
TC0600003536.mm.2	Clec1b	1.53333	0.045976	0.000184268	TRUE	UP
TC0700001258.mm.2	Ctsc	2.69833	0.0474856	0.000192457	TRUE	UP
TC1100000989.mm.2	Xaf1	2.96833	0.0500425	0.000215153	TRUE	UP
TC0600000388.mm.2	Tbxas1	1.6975	0.0500425	0.000219614	TRUE	UP
TC0500003532.mm.2	Mmd2	7.52833	0.0500425	0.000221373	TRUE	UP
TC1300000718.mm.2	Ntrk2	3.5575	0.0500425	0.000225356	TRUE	UP
TC1900001482.mm.2	Cyp2c70	1.34917	0.0502865	0.000230527	TRUE	UP
TC0500002694.mm.2	Ugt2b37	5.47833	0.0509635	0.000241259	TRUE	UP
TC0500002699.mm.2	Sult1d1	1.83583	0.0509635	0.000244239	TRUE	UP
TC0400003793.mm.2	C1qc	2.1125	0.052809	0.000256839	TRUE	UP
TC0800001202.mm.2	Ces4a	7.015	0.0535377	0.000262794	TRUE	UP
TC0100001252.mm.2	Csrp1	1.52417	0.0538307	0.000267137	TRUE	UP
TC0700003793.mm.2	Dgat2	0.9375	0.0547269	0.000282834	TRUE	UP
TC0700001178.mm.2	Tm6sf1	2.38667	0.0547269	0.000283418	TRUE	UP
TC0100002204.mm.2	Mgat4a	0.663333	0.0548667	0.000286613	TRUE	UP
TC1700002573.mm.2	Atl2	1.56667	0.0578585	0.000308329	TRUE	UP
TC1000000786.mm.2	Olfr1358	0.883333	0.0580672	0.000316407	TRUE	UP
TC0700003028.mm.2	Emp3	2.3125	0.0590367	0.000335445	TRUE	UP
TC0500002745.mm.2	G3bp2	1.61333	0.0615465	0.000372548	TRUE	UP
TC1000000759.mm.2	Itgb2	2.29417	0.0650938	0.00043091	TRUE	UP
TC1100000302.mm.2	Rtn4	1.03833	0.0665341	0.00044699	TRUE	UP
TC1100004270.mm.2	Tlcd2	2.3775	0.0665341	0.00045243	TRUE	UP
TC0300002053.mm.2	P2ry13	2.60667	0.0665481	0.000455522	TRUE	UP
TC1100000187.mm.2	Spred2	0.890833	0.0673726	0.00047874	TRUE	UP
TC0X00003360.mm.2	Tlr7	2.71583	0.0673726	0.000486536	TRUE	UP
TC1100004265.mm.2	Igtp	2.84	0.0673726	0.000492637	TRUE	UP
TC0X00002158.mm.2	Zdhhc9	0.694167	0.0673726	0.000495107	TRUE	UP
TC0600001418.mm.2	Cd163	1.80333	0.0673726	0.000497573	TRUE	UP
TC0400000018.mm.2	Chchd7	1.08	0.0679772	0.000505099	TRUE	UP
TC1700000470.mm.2	Anks1	2.77917	0.0695041	0.000529904	TRUE	UP
TC0800002927.mm.2	Sf3b3	0.631667	0.0695041	0.000532095	TRUE	UP
TC1500001736.mm.2	9030619P08Rik	7.84083	0.070212	0.000540676	TRUE	UP
TC1400001086.mm.2	Epsti1	1.5875	0.0704836	0.000549116	TRUE	UP
TC1200002434.mm.2	Akt1	1.60167	0.0723254	0.000569979	TRUE	UP
TC1100002003.mm.2	Rnf213	2.8125	0.0735318	0.000586108	TRUE	UP
TC1000001599.mm.2	Cs	1.05083	0.0739483	0.000593595	TRUE	UP
TC1700002791.mm.2	H2-Q1	1.9975	0.0739483	0.000596089	TRUE	UP
TC1100002648.mm.2	9930111J21Rik2	2.09333	0.0742596	0.000606355	TRUE	UP
TC0100000706.mm.2	Col4a3	3.70833	0.0742596	0.000619765	TRUE	UP
TC0900001900.mm.2	Acp5	1.8025	0.0742596	0.00062325	TRUE	UP
TC1700001265.mm.2	Abcg8	2.64417	0.0742596	0.000624201	TRUE	UP
TC0900003125.mm.2	Ccrl2	1.69	0.0742596	0.000626153	TRUE	UP
TC0200003165.mm.2	Fcna	2.05417	0.0742596	0.000627335	TRUE	UP
TC0600003329.mm.2	Plbd1	1.59833	0.0742596	0.000628695	TRUE	UP
TC1300002090.mm.2	Klhl3	1.4075	0.075545	0.00066446	TRUE	UP
TC0300003077.mm.2	Sh3glb1	1.0425	0.075545	0.000665682	TRUE	UP
TC1700002655.mm.2	Abcg5	3.33583	0.075545	0.000666794	TRUE	UP
TC0400002634.mm.2	Acnat1	1.74917	0.0800035	0.000728695	TRUE	UP
TC1300000425.mm.2	Ly86	2.725	0.0800035	0.000732045	TRUE	UP
TC1900000211.mm.2	Slc15a3	2.29917	0.0800035	0.000734968	TRUE	UP
TC0100002576.mm.2	Tns1	1.575	0.0802843	0.000765373	TRUE	UP
TC0800002734.mm.2	Ciapin1	1.34833	0.0802843	0.000766545	TRUE	UP
TC0200005181.mm.2	Znfx1	1.84	0.0802843	0.000770087	TRUE	UP
TC1700002823.mm.2	H2-T10	1.30667	0.080356	0.000789614	TRUE	UP
TC0400001274.mm.2	Eif2b3	0.669167	0.080356	0.00078993	TRUE	UP
TC1200002525.mm.2	Serpina3g	1.2075	0.080356	0.000801999	TRUE	UP
TC1300000919.mm.2	Glrx	0.761667	0.080356	0.000803343	TRUE	UP
TC1400002054.mm.2	Slc7a7	1.59083	0.0853785	0.000872408	TRUE	UP
TC1700001827.mm.2	Sik1	3.20333	0.0855867	0.000878761	TRUE	UP
TC0700003946.mm.2	Trim30d	2.3225	0.0867944	0.00089507	TRUE	UP
TC0900001195.mm.2	Paqr9	1.52917	0.0877471	0.000908867	TRUE	UP
TC0700002974.mm.2	Atf5	2.02917	0.0881611	0.000921075	TRUE	UP
TC0300000903.mm.2	Ctss	2.01417	0.0886084	0.000929738	TRUE	UP
TC0200004219.mm.2	Cd44	2.67667	0.0888237	0.00094324	TRUE	UP
TC0600003503.mm.2	Herc6	2.46917	0.0888237	0.000943997	TRUE	UP
TC0200003298.mm.2	Uck1	1.98	0.0889199	0.000954845	TRUE	UP
TC0500003050.mm.2	Selplg	1.2925	0.0889823	0.000961711	TRUE	UP
TC0700003778.mm.2	Tsku	1.48083	0.089101	0.000967006	TRUE	UP
TC1100003898.mm.2	Cdc27	0.880833	0.0891445	0.000971493	TRUE	UP
TC1700000335.mm.2	Abca3	2.5125	0.089293	0.000977132	TRUE	UP
TC0300002490.mm.2	BC028528	1.09083	0.089544	0.000983911	TRUE	UP
TC0500002840.mm.2	Plac8	3.56167	0.0896723	0.000989359	TRUE	UP
TC0100001176.mm.2	Slc41a1	1.90667	0.0934129	0.00103484	TRUE	UP
TC0200000868.mm.2	Gpd2	2.4825	0.0959656	0.00106744	TRUE	UP
TC0900001200.mm.2	Pcolce2	2.12167	0.0963096	0.00107994	TRUE	UP
TC0X00001934.mm.2	Cfp	2.49583	0.0966029	0.00108795	TRUE	UP
TC1100000442.mm.2	Ebf1	1.335	0.0972778	0.00110705	TRUE	UP
TC1200002272.mm.2	Serpina6	1.9825	0.0972778	0.0011156	TRUE	UP
TC1500000045.mm.2	Lifr	1.80167	0.0972778	0.00111739	TRUE	UP
TC1600001580.mm.2	Cd86	1.0175	0.0972778	0.00112394	TRUE	UP
TC1700001953.mm.2	Lst1	1.68667	0.0972778	0.00113022	TRUE	UP
TC1700002308.mm.2	Stap2	1.41583	0.0978827	0.00114166	TRUE	UP
TC0100001365.mm.2	Colgalt2	2.32667	0.0989424	0.00116387	TRUE	UP
TC0X00003437.mm.2	Il2rg	2.56333	0.0989424	0.00118352	TRUE	UP
TC0800002146.mm.2	Tlr3	1.30417	0.0989424	0.00119598	TRUE	UP
TC0900001563.mm.2	Itga9	1.2	0.0989424	0.0011968	TRUE	UP
TC0100003319.mm.2	Soat1	1.90917	0.0989424	0.00120678	TRUE	UP
TC0400003792.mm.2	C1qb	2.63083	0.0989424	0.0012121	TRUE	UP
TC0200003528.mm.2	Nmi	1.3525	0.0989424	0.00122085	TRUE	UP
TC0600000182.mm.2	Cped1	1.16667	0.099375	0.00123066	TRUE	UP
TC0700002143.mm.2	Lair1	2.11667	0.0994672	0.00124632	TRUE	UP
TC0100002392.mm.2	Trak2	1.58417	0.0994672	0.0012542	TRUE	UP
TC1000002627.mm.2	Hsp90b1	0.670833	0.0995147	0.00126376	TRUE	UP
TC1600000376.mm.2	Il1rap	-3.20917	0.00202663	4.75653e-07	TRUE	DOWN
TC0400003097.mm.2	Cyp2j6	-1.15917	0.00202663	6.00064e-07	TRUE	DOWN
TC1700001805.mm.2	Glo1	-2.43833	0.00319139	1.29346e-06	TRUE	DOWN
TC0400001223.mm.2	Cyp4a12b	-10.5333	0.0061138	2.75322e-06	TRUE	DOWN
TC0500000791.mm.2	Ugt2b35	-1.51083	0.00626605	3.10396e-06	TRUE	DOWN
TC1800000105.mm.2	Ttc39c	-1.89	0.0112072	6.05629e-06	TRUE	DOWN
TC0800002705.mm.2	Ces1f	-3.12417	0.0125629	9.3379e-06	TRUE	DOWN
TC0300000484.mm.2	Sucnr1	-4.04417	0.0172505	1.476e-05	TRUE	DOWN
TC0100000428.mm.2	Aox3	-1.99583	0.0208962	1.94183e-05	TRUE	DOWN
TC1000003047.mm.2	Rassf3	-1.21167	0.0229423	2.59908e-05	TRUE	DOWN
TC1000002645.mm.2	Chpt1	-2.22	0.0268076	4.02095e-05	TRUE	DOWN
TC1000003127.mm.2	Hsd17b6	-6.79167	0.0294752	4.64573e-05	TRUE	DOWN
TC0300001482.mm.2	Ddah1	-7.38167	0.0295753	4.79469e-05	TRUE	DOWN
TC1500000757.mm.2	Cyp2d9	-6.55833	0.0296131	4.93419e-05	TRUE	DOWN
TC0500002693.mm.2	Ugt2b5	-1.78167	0.030355	5.4987e-05	TRUE	DOWN
TC0200000037.mm.2	Phyh	-0.920833	0.0342406	7.6302e-05	TRUE	DOWN
TC1200001241.mm.2	Mark3	-0.641667	0.0353678	8.53275e-05	TRUE	DOWN
TC1500000760.mm.2	Cyp2d12	-2.57167	0.0377451	0.000107847	TRUE	DOWN
TC1900000684.mm.2	Elovl3	-3.83583	0.0408632	0.00012738	TRUE	DOWN
TC1900001550.mm.2	Cyp2c44	-6.21167	0.0408632	0.000128813	TRUE	DOWN
TC0100003186.mm.2	Cfhr1	-1.37667	0.0449936	0.00015157	TRUE	DOWN
TC0700002488.mm.2	Gemin7	-0.925833	0.0450984	0.0001579	TRUE	DOWN
TC0600000711.mm.2	Abcg2	-2.76583	0.0450984	0.000158411	TRUE	DOWN
TC0600002620.mm.2	Nat8	-1.585	0.045976	0.000169813	TRUE	DOWN
TC0100001607.mm.2	Dcaf8	-0.716667	0.045976	0.000178665	TRUE	DOWN
TC0600003600.mm.2	Cml5	-3.175	0.045976	0.000183642	TRUE	DOWN
TC0300001322.mm.2	Etnppl	-6.42417	0.0498328	0.000205688	TRUE	DOWN
TC0800001196.mm.2	Ces2e	-1.20667	0.0500425	0.00021318	TRUE	DOWN
TC1700000832.mm.2	Adgrf1	-5.45667	0.0500425	0.000224233	TRUE	DOWN
TC0100000635.mm.2	Vil1	-0.938333	0.0502865	0.000231773	TRUE	DOWN
TC0400001743.mm.2	Akr7a5	-1.52667	0.0509635	0.000241707	TRUE	DOWN
TC1400002266.mm.2	Ephx2	-1.76833	0.0509635	0.000245569	TRUE	DOWN
TC1800000794.mm.2	Acaa2	-0.72	0.0538307	0.000271213	TRUE	DOWN
TC0100001533.mm.2	Ildr2	-1.54	0.0538307	0.000272203	TRUE	DOWN
TC0800002418.mm.2	Gm17576	-1.15167	0.0580672	0.000315752	TRUE	DOWN
TC0200001826.mm.2	Casc4	-0.998333	0.0590367	0.000328779	TRUE	DOWN
TC0200003860.mm.2	Zswim2	-0.73	0.0590367	0.00033483	TRUE	DOWN
TC0200002869.mm.2	Mcm10	-3.96667	0.0590367	0.000334915	TRUE	DOWN
TC1300002536.mm.2	Ocln	-1.72417	0.0590367	0.000340273	TRUE	DOWN
TC1100001047.mm.2	Cluh	-0.871667	0.0590367	0.000342958	TRUE	DOWN
TC0600002870.mm.2	Cntn3	-0.7	0.0615465	0.000372017	TRUE	DOWN
TC1500000221.mm.2	Sdc2	-1.02417	0.0615465	0.000374168	TRUE	DOWN
TC1100002225.mm.2	Ddc	-1.73583	0.0618592	0.000381535	TRUE	DOWN
TC0X00003057.mm.2	Serpina7	-5.37583	0.0618592	0.000381987	TRUE	DOWN
TC0800002706.mm.2	Ces1g	-2.82917	0.0633256	0.000399242	TRUE	DOWN
TC0600001813.mm.2	Slc25a13	-1.2625	0.0634743	0.000403038	TRUE	DOWN
TC0800000394.mm.2	Gsr	-1.12583	0.0641159	0.00041	TRUE	DOWN
TC1000000713.mm.2	Upb1	-2.33417	0.0649607	0.000419836	TRUE	DOWN
TC0200004044.mm.2	Olfr1223	-0.908333	0.0649607	0.000422417	TRUE	DOWN
TC0600000974.mm.2	Tprkb	-1.16083	0.0649607	0.000424178	TRUE	DOWN
TC0600001374.mm.2	Mug2	-2.47917	0.0650938	0.000429714	TRUE	DOWN
TC0200005011.mm.2	Soga1	-0.883333	0.0665341	0.000447984	TRUE	DOWN
TC1300001494.mm.2	Sugct	-1.30167	0.0666236	0.000459038	TRUE	DOWN
TC1900000040.mm.2	Pcx	-0.830833	0.0673726	0.000467387	TRUE	DOWN
TC0400001305.mm.2	Hyi	-2.20917	0.0673726	0.000480971	TRUE	DOWN
TC0700002047.mm.2	Eps8l2	-2.42667	0.0673726	0.000482122	TRUE	DOWN
TC0300003173.mm.2	Acadm	-1.79583	0.0673726	0.000489749	TRUE	DOWN
TC0700001715.mm.2	Acsm3	-1.135	0.0673726	0.000493499	TRUE	DOWN
TC0300001413.mm.2	Adh6-ps1	-4.30167	0.0682579	0.000510259	TRUE	DOWN
TC1200002077.mm.2	Entpd5	-1.11333	0.0704836	0.000548979	TRUE	DOWN
TC1400001655.mm.2	Il17rb	-2.24583	0.0723254	0.000567931	TRUE	DOWN
TC0X00001501.mm.2	Alas2	-3.26917	0.0742596	0.000615433	TRUE	DOWN
TC0X00002074.mm.2	Rhox7b	-0.5825	0.0752227	0.000645205	TRUE	DOWN
TC1400001047.mm.2	Esd	-1.28333	0.075545	0.000664742	TRUE	DOWN
TC0600001082.mm.2	Hdac11	-1.12833	0.0779225	0.000691288	TRUE	DOWN
TC0500001228.mm.2	Fam222a	-0.969167	0.078041	0.000699367	TRUE	DOWN
TC1100003561.mm.2	Abcc3	-4.91333	0.0789343	0.000710927	TRUE	DOWN
TC1400002756.mm.2	Ggact	-1.14833	0.0795928	0.000720443	TRUE	DOWN
TC0900002379.mm.2	Cyp1a2	-1.63333	0.0802843	0.000741369	TRUE	DOWN
TC1500001430.mm.2	Dpys	-1.44417	0.0802843	0.000748103	TRUE	DOWN
TC1700001536.mm.2	Vmn2r106	-0.963333	0.0802843	0.000756866	TRUE	DOWN
TC0400002606.mm.2	Gabbr2	-2.17417	0.0802843	0.000758892	TRUE	DOWN
TC0200000778.mm.2	Gm19922	-0.7475	0.0802843	0.000761084	TRUE	DOWN
TC1100001550.mm.2	Lasp1	-0.846667	0.080356	0.000777263	TRUE	DOWN
TC1500001952.mm.2	Cyp2d34	-2.05	0.080356	0.000802643	TRUE	DOWN
TC1800001122.mm.2	Proc	-0.965833	0.080356	0.000803218	TRUE	DOWN
TC0400001221.mm.2	Cyp4a12a	-12.5808	0.0823135	0.000830326	TRUE	DOWN
TC1800000468.mm.2	Kcnn2	-1.3525	0.08388	0.000849905	TRUE	DOWN
TC0200002237.mm.2	Gm14151; Gm14147	-1.28583	0.0853785	0.000872778	TRUE	DOWN
TC1500001378.mm.2	Snx31	-1.10667	0.0877471	0.000912797	TRUE	DOWN
TC0600000591.mm.2	Mpp6	-0.765833	0.0889199	0.000950919	TRUE	DOWN
TC0600002626.mm.2	Cml1	-1.39667	0.0889199	0.000957032	TRUE	DOWN
TC0500001501.mm.2	Adgrd1	-1.02083	0.0963096	0.00107675	TRUE	DOWN
TC1500000014.mm.2	C6	-5.005	0.0966029	0.00109193	TRUE	DOWN
TC0100003190.mm.2	Gm4788	-1.10083	0.0972778	0.00111509	TRUE	DOWN
TC1200000839.mm.2	Mfsd7c	-1.02417	0.0972778	0.00112978	TRUE	DOWN
TC0700000693.mm.2	1600014C10Rik	-1.35917	0.0979497	0.00114685	TRUE	DOWN
TC1300002420.mm.2	Msh3	-1.08333	0.0989424	0.0011677	TRUE	DOWN
TC0300001176.mm.2	Olfm3	-1.55667	0.0989424	0.00118625	TRUE	DOWN
TC0500001751.mm.2	Bri3	-0.756667	0.0989424	0.00118733	TRUE	DOWN
TC0300002491.mm.2	Car14	-1.20583	0.0989424	0.00121854	TRUE	DOWN
TC1900000567.mm.2	Cyp2c37	-1.84583	0.0989424	0.00122069	TRUE	DOWN
TC0900002719.mm.2	Gsta2	-5.35	0.0994672	0.00123997	TRUE	DOWN
TC1000002943.mm.2	Slc35e3	-1.44167	0.0994672	0.00124675	TRUE	DOWN
TC0900003293.mm.2	Zfp445	-1.45167	0.0994672	0.00125179	TRUE	DOWN

## Sheet: Sheet 7
ID	Gene.Symbol	Status ZT2	FC_ZT2	p_value_ZT_2	Status ZT6	FC_ZT6	p_value_ZT_6	Status ZT10	FC_ZT10	p_value_ZT_10	Status ZT14	FC_ZT14	p_value_ZT_14	Status ZT18	FC_ZT18	p_value_ZT_18	Status ZT22	FC_ZT22	p_value_ZT_22
TC1300001377.mm.2	Akr1c18	UP	12.31	0.00043417	UP	11.5975	0.00102555	UP	11.655	0.00086205	UP	11.4675	0.00186134	UP	11.05	0.00259223	UP	11.7233	0.00161483
TC0500003596.mm.2	Cyp3a16	UP	11.875	0.0018972	UP	10.85	0.00102555	UP	11.77	0.00091468	UP	11.4025	0.00354394	UP	9.4275	0.0587027	UP	10.7175	0.0125629
TC0800001202.mm.2	Ces4a	UP	7.4	0.00904615	UP	5.9225	0.0812591	UP	6.4675	0.00086205	UP	6.4625	0.0815323	UP	7	0.00584118	UP	7.015	0.0535377
TC0900001726.mm.2	Cep126	UP	7.35	0.00205933	UP	7.395	0.00381568	UP	6.7875	0.00040632	UP	6.855	0.0781947	UP	7.6525	0.0075962	UP	7.41417	0.00274647
TC0500003532.mm.2	Mmd2	UP	6.5	0.00792189	UP	6.67	0.048723	UP	5.3325	0.0578858	UP	6.12	0.0497231	UP	5.025	0.0648092	UP	7.52833	0.0500425
TC0500002694.mm.2	Ugt2b37	UP	5.475	0.0210677	UP	4.565	0.0230023	UP	4.675	0.0181614	UP	4.495	0.0359698	UP	5.5775	0.00884003	UP	5.47833	0.0509636
TC0600000362.mm.2	Trim24	UP	5.0225	0.00050735	UP	4.47	0.0198516	UP	3.205	0.0441336	UP	3.385	0.0281981	UP	2.815	0.0434891	UP	4.02583	0.0390197
TC0900001128.mm.2	Nt5e	UP	4.635	0.0019312	UP	4.9575	0.00102555	UP	3.945	0.0573412	UP	4.7975	0.00596321	UP	4.2725	0.0307274	UP	5.3725	0.0384193
TC1900000467.mm.2	Papss2	UP	3.37	0.00481614	UP	3.495	0.0331693	UP	2.9075	0.0182932	UP	2.5575	0.0370682	UP	3.065	0.0223214	UP	3.25583	0.045976
TC1400001906.mm.2	Ddhd1; Mir5131	UP	3.05	0.00377783	UP	3.04	0.0320304	UP	1.9975	0.00845831	UP	2.1	0.0158616	UP	2.6525	0.00899543	UP	3.18083	0.0449936
TC1700000836.mm.2	Cyp39a1	UP	2.865	0.00051143	UP	3.46	0.0305246	UP	3.2675	0.00035528	UP	2.7575	0.0150346	UP	2.74	0.00663543	UP	3.21667	0.0342406
TC1700000470.mm.2	Anks1	UP	2.76	0.048861	UP	2.7125	0.0904359	UP	1.825	0.0149349	UP	3.025	0.0389767	UP	2.34	0.0095252	UP	2.77917	0.0695041
TC1000002383.mm.2	Gstt1	UP	2.695	0.00732532	UP	3.3275	0.00903936	UP	2.835	0.00590365	UP	2.6225	0.0732185	UP	2.7975	0.0128594	UP	2.82917	0.0422883
TC0500002699.mm.2	Sult1d1	UP	2.65	0.0693052	UP	2.83	0.0331693	UP	2.37	0.0403492	UP	2.2175	0.0236892	UP	1.825	0.00530198	UP	1.83583	0.0509636
TC1800001175.mm.2	Slc23a1	UP	2.5375	0.00860191	UP	2.7	0.0677361	UP	2.52	0.0374039	UP	2.3975	0.00520405	UP	2.6325	0.0120486	UP	2.39667	0.0449936
TC0100000847.mm.2	Spp2	UP	2.3475	0.00844313	UP	2.25	0.0904359	UP	2.2525	0.0468033	UP	1.8275	0.0867994	UP	2.04	0.0128594	UP	2.26583	0.0268076
TC1900000317.mm.2	Rfk	UP	2.22	0.00363817	UP	2.275	0.0313575	UP	1.8225	0.0024555	UP	1.865	0.0131363	UP	1.78	0.0276232	UP	1.90667	0.0303549
TC1000001701.mm.2	Ginm1	UP	1.9275	0.00180607	UP	2.345	0.0259012	UP	1.7625	0.0467628	UP	1.51	0.00679098	UP	2.2075	0.0231328	UP	2.33667	0.0125629
TC0400002634.mm.2	Acnat1	UP	1.64	0.081971	UP	2.525	0.0215321	UP	2.97	0.0303129	UP	2.9875	0.0389767	UP	1.4075	0.0480407	UP	1.74917	0.0800035
TC0900001900.mm.2	Acp5	UP	1.3625	0.0788817	UP	2.19	0.00102555	UP	1.595	0.00526768	UP	1.815	0.00351257	UP	1.695	0.045832	UP	1.8025	0.0742596
TC1700002573.mm.2	Atl2	UP	1.2475	0.018419	UP	1.6625	0.00426467	UP	1.2525	0.0813591	UP	1.5675	0.00538124	UP	1.47	0.00859359	UP	1.56667	0.0578585
TC0100002576.mm.2	Tns1	UP	1.225	0.0498631	UP	1.2125	0.0565423	UP	1.17	0.00522661	UP	1.575	0.0956187	UP	1.4925	0.0470234	UP	1.575	0.0802843
TC0400001221.mm.2	Cyp4a12a	DOWN	-12.905	0.00017784	DOWN	-11.52	0.00878688	DOWN	-11.31	0.0401977	DOWN	-12.135	0.00064613	DOWN	-10.7925	0.0481872	DOWN	-12.5808	0.0823135
TC0400001223.mm.2	Cyp4a12b	DOWN	-10.915	0.00043417	DOWN	-10.34	0.00237355	DOWN	-9.97	0.0262204	DOWN	-10.34	0.00043989	DOWN	-10.4775	0.0464583	DOWN	-10.5333	0.0061138
TC1900001550.mm.2	Cyp2c44	DOWN	-6.64	0.00043417	DOWN	-7.205	0.0042924	DOWN	-6.3875	0.0320746	DOWN	-6.0275	0.0778482	DOWN	-6.1425	0.00749121	DOWN	-6.21167	0.0408632
TC1700000832.mm.2	Adgrf1	DOWN	-5.55	0.0018972	DOWN	-4.9675	0.0717181	DOWN	-5.16	0.0184097	DOWN	-4.1475	0.0372194	DOWN	-4.69	0.0264906	DOWN	-5.45667	0.0500425
TC1100003561.mm.2	Abcc3	DOWN	-5.355	0.00379572	DOWN	-4.775	0.00453636	DOWN	-5.3075	0.000505	DOWN	-4.4575	0.0818853	DOWN	-5.625	0.00170614	DOWN	-4.91333	0.0789343
TC0200002869.mm.2	Mcm10	DOWN	-4.7625	0.00117515	DOWN	-3.785	0.04976	DOWN	-3.6275	0.0874957	DOWN	-3.8775	0.0327126	DOWN	-4.2825	0.00656797	DOWN	-3.96667	0.0590367
TC0300001413.mm.2	Adh6-ps1	DOWN	-4.6325	0.0436344	DOWN	-3.845	0.0149671	DOWN	-4.78	0.0316625	DOWN	-5.3475	0.00430128	DOWN	-4.07	0.027107	DOWN	-4.30167	0.0682579
TC0X00001501.mm.2	Alas2	DOWN	-4.0125	0.00369806	DOWN	-2.895	0.00724004	DOWN	-3.175	0.0477	DOWN	-3.48	0.0233885	DOWN	-3.3425	0.0120486	DOWN	-3.26917	0.0742596
TC0600000711.mm.2	Abcg2	DOWN	-3.3125	0.0105801	DOWN	-2.1075	0.0599321	DOWN	-2.945	0.076043	DOWN	-3.0075	0.0991579	DOWN	-2.5	0.030442	DOWN	-2.76583	0.0450984
TC0400002606.mm.2	Gabbr2	DOWN	-3.19	0.0236944	DOWN	-3.685	0.0252347	DOWN	-3.96	0.0143339	DOWN	-2.71	0.0250948	DOWN	-2.7075	0.0262595	DOWN	-2.17417	0.0802843
TC1700001805.mm.2	Glo1	DOWN	-2.7475	0.00649765	DOWN	-2.4325	0.0581895	DOWN	-2.2025	0.00753925	DOWN	-1.99	0.0257718	DOWN	-2.2325	0.0120486	DOWN	-2.43833	0.00319139
TC1000000713.mm.2	Upb1	DOWN	-2.4875	0.00152011	DOWN	-2.0775	0.0097337	DOWN	-2.41	0.0573412	DOWN	-2.2175	0.0218067	DOWN	-2.5025	0.0198476	DOWN	-2.33417	0.0649607
TC1500000760.mm.2	Cyp2d12	DOWN	-2.4325	0.0783141	DOWN	-2.5625	0.0562598	DOWN	-2.125	0.00772641	DOWN	-3.0025	0.00043989	DOWN	-2.4875	0.0149118	DOWN	-2.57167	0.0377451
TC1400002266.mm.2	Ephx2	DOWN	-2.21	0.0170934	DOWN	-1.6875	0.0707027	DOWN	-1.625	0.0979519	DOWN	-2.0675	0.0670105	DOWN	-1.5575	0.0377739	DOWN	-1.76833	0.0509636
TC1000002943.mm.2	Slc35e3	DOWN	-1.4475	0.0110827	DOWN	-1.1825	0.0789667	DOWN	-1.785	0.0049281	DOWN	-1.4525	0.0781947	DOWN	-1.43	0.0276383	DOWN	-1.44167	0.0994672

## Sheet: Sheet 8
	T3 vs. Spp2	T3 vs. Tns1	T3 vs. Acnat1	T3 vs. Ugt2b37	T3 vs. Sult1d1	T3 vs. Mmd2	T3 vs. Cyp3a16	T3 vs. Trim24	T3 vs. Ces4a	T3 vs. Nt5e	T3 vs. Cep126	T3 vs. Acp5	T3 vs. Ginm1	T3 vs. Gstt1	T3 vs. Akr1c18	T3 vs. Ddhd1; Mir5131	T3 vs. Anks1	T3 vs. Cyp39a1	T3 vs. Atl2	T3 vs. Slc23a1	T3 vs. Rfk	T3 vs. Papss2
Spearman r
r	0.7291	0.7283	0.8109	0.7793	0.7758	0.7122	0.7393	0.6957	0.7632	0.7919	0.7851	0.7642	0.7742	0.7301	0.731	0.7684	0.8411	0.7746	0.7458	0.7201	0.7751	0.7164
95% confidence interval	0.5529 to 0.8429	0.5517 to 0.8424	0.6781 to 0.8925	0.6287 to 0.8735	0.6234 to 0.8714	0.5280 to 0.8324	0.5682 to 0.8492	0.5041 to 0.8221	0.6042 to 0.8638	0.6483 to 0.8811	0.6377 to 0.8770	0.6056 to 0.8644	0.6210 to 0.8705	0.5545 to 0.8435	0.5558 to 0.8441	0.6120 to 0.8669	0.7262 to 0.9103	0.6215 to 0.8707	0.5778 to 0.8531	0.5396 to 0.8373	0.6223 to 0.8710	0.5342 to 0.8350
P (two-tailed)	<0.0001	<0.0001	<0.0001	<0.0001	<0.0001	<0.0001	<0.0001	<0.0001	<0.0001	<0.0001	<0.0001	<0.0001	<0.0001	<0.0001	<0.0001	<0.0001	<0.0001	<0.0001	<0.0001	<0.0001	<0.0001	<0.0001
P value summary	****	****	****	****	****	****	****	****	****	****	****	****	****	****	****	****	****	****	****	****	****	****
	T3 vs. Mcm10	T3 vs. Adh6-ps1	T3 vs. Cyp4a12a	T3 vs. Cyp4a12b	T3 vs. Gabbr2	T3 vs. Abcg2	T3 vs. Alas2	T3 vs. Upb1	T3 vs. Slc35e3	T3 vs. Abcc3	T3 vs. Ephx2	T3 vs. Cyp2d12	T3 vs. Adgrf1	T3 vs. Glo1	T3 vs. Cyp2c44
Spearman r
r	-0.8276	-0.7359	-0.8161	-0.779	-0.7493	-0.7724	-0.8006	-0.8238	-0.6936	-0.8044	-0.7951	-0.7992	-0.8103	-0.7699	-0.8287
95% confidence interval	-0.9023 to -0.7045	-0.8471 to -0.5630	-0.8955 to -0.6862	-0.8734 to -0.6284	-0.8553 to -0.5831	-0.8694 to -0.6182	-0.8863 to -0.6618	-0.9001 to -0.6985	-0.8208 to -0.5011	-0.8886 to -0.6678	-0.8830 to -0.6532	-0.8855 to -0.6596	-0.8921 to -0.6771	-0.8678 to -0.6143	-0.9030 to -0.7063
P (two-tailed)	<0.0001	<0.0001	<0.0001	<0.0001	<0.0001	<0.0001	<0.0001	<0.0001	<0.0001	<0.0001	<0.0001	<0.0001	<0.0001	<0.0001	<0.0001
P value summary	****	****	****	****	****	****	****	****	****	****	****	****	****	****	****

## Sheet: Sheet 9
Category	Term_1	Term	Count	%	PValue	Genes	List Total	Pop Hits	Pop Total
GOTERM_BP_DIRECT	GO:0006629	lipid metabolic process	5	13.1579	0.00749336	CYP39A1, SULT1D1, EPHX2, DDHD1, ACNAT1	32	459	18082
GOTERM_BP_DIRECT	GO:0000103	sulfate assimilation	2	5.26316	0.0153277	SULT1D1, PAPSS2	32	9	18082
GOTERM_BP_DIRECT	GO:0015893	drug transport	2	5.26316	0.0170167	ABCC3, ABCG2	32	10	18082
GOTERM_BP_DIRECT	GO:0006855	drug transmembrane transport	2	5.26316	0.0237446	ABCC3, ABCG2	32	14	18082
GOTERM_BP_DIRECT	GO:0008152	metabolic process	4	10.5263	0.0441421	ALAS2, EPHX2, UPB1, PAPSS2	32	463	18082
GOTERM_BP_DIRECT	GO:0006749	glutathione metabolic process	2	5.26316	0.0807436	GLO1, GSTT1	32	49	18082
