# Supplementary material for: Rewiring of liver diurnal transcriptome rhythms by triiodothyronine (T3) supplementation
Source: eLife. 2022 Jul 27;11:e79405. doi: 10.7554/eLife.79405 (PMC9391036; doi:10.7554/eLife.79405)
Supplement: Supplementary file 5. [file elife-79405-supp5.xlsx]

## Sheet: Summary
Supplementary Table S5. Rhythmic evaluation by JTK cycle
Sheet 1 - JTK cycle analyses for CON group
Sheet 2 - JTK cycle analyses for T3 group
Sheet 3 - Shared rhythmic genes between CON and T3 groups
Sheet 4 - GSEA of exclusive rhythmic genes of CON group
Sheet 5 - GSEA of exclusive rhythmic genes of T3 group
Sheet 6 - GSEA of shared rhythmic genes

## Sheet: Sheet 1
CycID	Gene.Symbol	JTK_pvalue	JTK_BH.Q	JTK_period	JTK_adjphase	JTK_amplitude
TC0900000835.mm.2	Clpx	3.36345e-13	7.46887e-09	24	0	1.68468
TC0300000864.mm.2	Rorc	3.75989e-10	1.66984e-06	24	18	2.05591
TC0700002056.mm.2	Tspan4	3.75989e-10	1.66984e-06	24	16	0.965201
TC1100003688.mm.2	Nr1d1	3.75989e-10	1.66984e-06	24	8	3.19612
TC1200000279.mm.2	Nampt	3.75989e-10	1.66984e-06	24	14	1.28517
TC0700003764.mm.2	Thrsp	1.39374e-09	5.15824e-06	24	16	2.11778
TC0300000272.mm.2	4932438A13Rik	2.5756e-09	7.14923e-06	24	0	0.620486
TC0400004074.mm.2	Per3	2.5756e-09	7.14923e-06	24	12	1.97283
TC0100002552.mm.2	Mreg	4.6457e-09	8.59687e-06	24	22	0.611647
TC0300002489.mm.2	Ciart	4.6457e-09	8.59687e-06	24	12	2.49609
TC0600003600.mm.2	Cml5	4.6457e-09	8.59687e-06	24	18	1.63695
TC0700004630.mm.2	Hsd3b7	4.6457e-09	8.59687e-06	24	2	0.767211
TC0500003314.mm.2	Asl	6.42055e-09	1.01839e-05	24	18	0.954594
TC1500002246.mm.2	Smagp	6.42055e-09	1.01839e-05	24	2	0.875045
TC0700002047.mm.2	Eps8l2	8.19539e-09	1.13742e-05	24	2	1.06066
TC1100002314.mm.2	Lgalsl	8.19539e-09	1.13742e-05	24	22	1.4531
TC0700003614.mm.2	Homer2	1.41627e-08	1.57249e-05	24	14	1.0642
TC0700004176.mm.2	Gde1	1.41627e-08	1.57249e-05	24	16	0.799031
TC1000001506.mm.2	Avpr1a	1.41627e-08	1.57249e-05	24	0	1.24097
TC1800001237.mm.2	Fgf1	1.41627e-08	1.57249e-05	24	18	0.883883
TC0100001381.mm.2	Rgs16	2.40125e-08	2.31836e-05	24	10	3.12895
TC0700001624.mm.2	Wee1	2.40125e-08	2.31836e-05	24	14	1.78898
TC1400001499.mm.2	Nr1d2	2.40125e-08	2.31836e-05	24	10	1.78191
TC0400001856.mm.2	Dhrs3	3.20033e-08	2.84266e-05	24	0	0.719481
TC0500001584.mm.2	Por	3.20033e-08	2.84266e-05	24	14	1.15966
TC0100003401.mm.2	Fmo1	3.99941e-08	3.17182e-05	24	18	0.434871
TC1000001679.mm.2	Syne1	3.99941e-08	3.17182e-05	24	2	0.753069
TC1500001657.mm.2	Ndrg1	3.99941e-08	3.17182e-05	24	2	1.38946
TC1200001460.mm.2	Lpin1	6.55138e-08	5.01655e-05	24	12	1.65817
TC0500002628.mm.2	Clock	8.55843e-08	6.33495e-05	24	0	0.811405
TC1900000684.mm.2	Elovl3	1.05655e-07	7.56828e-05	24	0	2.9504
TC0200003148.mm.2	BC029214	1.36781e-07	9.49175e-05	24	22	0.533866
TC0500001936.mm.2	Crot	1.67908e-07	0.000109663	24	4	0.767211
TC1400002859.mm.2	Hacl1	1.67908e-07	0.000109663	24	22	0.954594
TC0400002373.mm.2	Pnrc1	2.15539e-07	0.000132951	24	0	1.29931
TC1700002314.mm.2	Plin5	2.15539e-07	0.000132951	24	18	0.841457
TC0400001925.mm.2	Mad2l2	2.6317e-07	0.000135906	24	2	0.604576
TC0700001660.mm.2	Arntl	2.6317e-07	0.000135906	24	0	2.49255
TC0800000991.mm.2	Gpt2	2.6317e-07	0.000135906	24	14	0.654074
TC0X00003075.mm.2	Tsc22d3	2.6317e-07	0.000135906	24	18	1.29224
TC1100000032.mm.2	Sec14l4	2.6317e-07	0.000135906	24	18	0.286378
TC1500002052.mm.2	Sco2; Tymp	2.6317e-07	0.000135906	24	0	0.929845
TC1700001822.mm.2	Cbs	2.6317e-07	0.000135906	24	4	0.77605
TC0100001788.mm.2	Slc30a10	3.35142e-07	0.000158344	24	0	1.17733
TC0300002605.mm.2	Atp1a1	3.35142e-07	0.000158344	24	14	0.523259
TC0600000841.mm.2	St3gal5	3.35142e-07	0.000158344	24	14	0.857367
TC1700001757.mm.2	Fkbp5	3.35142e-07	0.000158344	24	14	0.951059
TC0700000861.mm.2	Dbp	4.07115e-07	0.000184498	24	12	4.46538
TC1300001779.mm.2	Tubb2a	4.07115e-07	0.000184498	24	0	1.93747
TC0100002349.mm.2	Pgap1	5.14571e-07	0.000219742	24	10	0.563918
TC0500001751.mm.2	Bri3	5.14571e-07	0.000219742	24	10	0.685894
TC1000002605.mm.2	Cry1	5.14571e-07	0.000219742	24	20	1.05359
TC0200000868.mm.2	Gpd2	6.22028e-07	0.000246656	24	10	0.537401
TC0400000496.mm.2	Stra6l	6.22028e-07	0.000246656	24	2	0.710642
TC0X00001502.mm.2	Pfkfb1	6.22028e-07	0.000246656	24	18	0.668216
TC1900001425.mm.2	Slc16a12	6.22028e-07	0.000246656	24	14	0.850296
TC0100001180.mm.2	Slc45a3	7.80646e-07	0.000288917	24	22	1.48846
TC0100002969.mm.2	Insig2	7.80646e-07	0.000288917	24	2	1.67584
TC0500000008.mm.2	Cdk6	7.80646e-07	0.000288917	24	10	0.325269
TC1900001355.mm.2	Gldc	7.80646e-07	0.000288917	24	0	0.754836
TC0200000879.mm.2	Upp2	9.39264e-07	0.000336408	24	12	1.30461
TC1100000576.mm.2	Sar1b	9.39264e-07	0.000336408	24	18	0.30052
TC1500001214.mm.2	Tars	1.17088e-06	0.000406257	24	0	0.657609
TC1700000836.mm.2	Cyp39a1	1.17088e-06	0.000406257	24	18	0.544472
TC0100002801.mm.2	Per2	1.40249e-06	0.000438643	24	14	1.68291
TC0200004943.mm.2	Pxmp4	1.40249e-06	0.000438643	24	0	0.989949
TC0400001509.mm.2	Ak2	1.40249e-06	0.000438643	24	14	0.700036
TC0600003374.mm.2	Gys2	1.40249e-06	0.000438643	24	12	1.20385
TC0X00002993.mm.2	Timm8a1	1.40249e-06	0.000438643	24	14	0.49851
TC0Y00000325.mm.2	Gm29073	1.40249e-06	0.000438643	24	2	0.491439
TC1000002338.mm.2	A930033H14Rik	1.40249e-06	0.000438643	24	12	0.993485
TC1100001841.mm.2	Map2k6	1.73721e-06	0.000521303	24	14	0.751301
TC1900001095.mm.2	Fads2	1.73721e-06	0.000521303	24	12	0.579828
TC1900001445.mm.2	Ppp1r3c	1.73721e-06	0.000521303	24	22	2.03647
TC0400002633.mm.2	Acnat2	2.07193e-06	0.000575115	24	22	0.892722
TC0600001051.mm.2	Txnrd3	2.07193e-06	0.000575115	24	12	0.572756
TC0600003428.mm.2	Bhlhe41	2.07193e-06	0.000575115	24	10	1.35765
TC1000002453.mm.2	Pdxk	2.07193e-06	0.000575115	24	16	0.774282
TC1300000671.mm.2	Ddx46	2.07193e-06	0.000575115	24	10	0.367696
TC1700002199.mm.2	Ubr2	2.07193e-06	0.000575115	24	12	0.452548
TC0200000393.mm.2	Pnpla7	2.55089e-06	0.000674347	24	4	0.461387
TC0700004610.mm.2	Ccnd1; Mir3962	2.55089e-06	0.000674347	24	10	0.735391
TC1100000440.mm.2	Rnf145	2.55089e-06	0.000674347	24	12	0.657609
TC1200001281.mm.2	Crip2	2.55089e-06	0.000674347	24	0	0.825547
TC0100001123.mm.2	Acmsd	3.02986e-06	0.000715756	24	20	1.12784
TC0100002121.mm.2	Ptp4a1; Gm13363	3.02986e-06	0.000715756	24	14	0.540937
TC0400001034.mm.2	Ak4	3.02986e-06	0.000715756	24	14	1.00056
TC0600002620.mm.2	Nat8	3.02986e-06	0.000715756	24	18	0.811405
TC0700000554.mm.2	Polr2i	3.02986e-06	0.000715756	24	18	0.39598
TC0800001891.mm.2	1810011O10Rik	3.02986e-06	0.000715756	24	16	0.855599
TC0900003040.mm.2	Slc38a3	3.02986e-06	0.000715756	24	10	0.576292
TC1500000731.mm.2	Tef	3.02986e-06	0.000715756	24	12	0.919239
TC1700002655.mm.2	Abcg5	3.02986e-06	0.000715756	24	10	1.17026
TC1800000160.mm.2	Rnf125	3.02986e-06	0.000715756	24	2	1.50437
TC0200002887.mm.2	Proser2	3.7088e-06	0.000840383	24	22	0.629325
TC0200003307.mm.2	Fpgs; Mir8093	3.7088e-06	0.000840383	24	22	0.620486
TC1200000839.mm.2	Mfsd7c	3.7088e-06	0.000840383	24	6	0.850296
TC1700001677.mm.2	Fam195a	3.7088e-06	0.000840383	24	18	0.707107
TC0300001137.mm.2	Sort1	4.38773e-06	0.000936866	24	6	0.717713
TC0500003708.mm.2	Mrpl33	4.38773e-06	0.000936866	24	18	0.233345
TC1100001276.mm.2	Acaca	4.38773e-06	0.000936866	24	14	0.756604
TC1300002099.mm.2	Hnrnpk	4.38773e-06	0.000936866	24	6	0.282843
TC1700001062.mm.2	Man2a1	4.38773e-06	0.000936866	24	14	0.496743
TC1800000396.mm.2	Rnf14	4.38773e-06	0.000936866	24	10	0.307591
TC0100000393.mm.2	Coq10b	5.34145e-06	0.00106858	24	12	0.972272
TC0100003662.mm.2	Adck3	5.34145e-06	0.00106858	24	0	1.11369
TC0300002797.mm.2	S1pr1	5.34145e-06	0.00106858	24	22	0.629325
TC0600003598.mm.2	Cml3	5.34145e-06	0.00106858	24	18	1.10662
TC0700003793.mm.2	Dgat2	5.34145e-06	0.00106858	24	14	0.449013
TC0900000497.mm.2	Usp2	5.34145e-06	0.00106858	24	14	2.65165
TC0900001921.mm.2	Dpy19l1	5.34145e-06	0.00106858	24	18	0.272236
TC0100000282.mm.2	Npas2	6.29516e-06	0.00119479	24	0	1.8261
TC0200005317.mm.2	Slmo2	6.29516e-06	0.00119479	24	16	0.484368
TC0400001924.mm.2	Mthfr	6.29516e-06	0.00119479	24	0	0.645235
TC1000000355.mm.2	Ddo	6.29516e-06	0.00119479	24	18	0.512652
TC1000002650.mm.2	Utp20	6.29516e-06	0.00119479	24	16	0.374767
TC1200002518.mm.2	Asap2	6.29516e-06	0.00119479	24	0	1.20031
TC0400000341.mm.2	Aco1	7.62326e-06	0.00139903	24	18	0.374767
TC0400002634.mm.2	Acnat1	7.62326e-06	0.00139903	24	22	1.15258
TC0500002213.mm.2	Spon2	7.62326e-06	0.00139903	24	2	1.23037
TC1100002728.mm.2	Leap2	7.62326e-06	0.00139903	24	22	1.01823
TC0100000890.mm.2	Ube2f	8.95136e-06	0.00151736	24	18	0.33234
TC0100001680.mm.2	Desi2	8.95136e-06	0.00151736	24	22	0.533866
TC0200000033.mm.2	Bend7	8.95136e-06	0.00151736	24	10	0.392444
TC0300000354.mm.2	Noct	8.95136e-06	0.00151736	24	14	1.76953
TC0500003297.mm.2	Stx2	8.95136e-06	0.00151736	24	20	0.410122
TC0700004221.mm.2	Gga2	8.95136e-06	0.00151736	24	20	0.298753
TC0900000863.mm.2	Fam96a	8.95136e-06	0.00151736	24	20	0.480833
TC1500001585.mm.2	Mtss1	8.95136e-06	0.00151736	24	14	0.995253
TC1900000249.mm.2	Gm4952	8.95136e-06	0.00151736	24	4	0.986414
TC1900000801.mm.2	Nhlrc2	8.95136e-06	0.00151736	24	14	0.441942
TC0200001524.mm.2	Slc1a2	1.07855e-05	0.00176104	24	12	0.535633
TC0300001076.mm.2	Slc16a1	1.07855e-05	0.00176104	24	0	0.601041
TC0800000790.mm.2	Mrpl34	1.07855e-05	0.00176104	24	20	0.586899
TC1100000324.mm.2	Cpeb4	1.07855e-05	0.00176104	24	2	0.53033
TC1900000205.mm.2	Ddb1	1.07855e-05	0.00176104	24	12	0.289914
TC0800001319.mm.2	Vac14	1.26195e-05	0.00195965	24	16	0.597505
TC1100000771.mm.2	Map2k3	1.26195e-05	0.00195965	24	14	0.59397
TC1100003019.mm.2	Ndel1	1.26195e-05	0.00195965	24	12	0.339411
TC1100003300.mm.2	Tmem97	1.26195e-05	0.00195965	24	12	0.468458
TC1400001314.mm.2	Ipo5	1.26195e-05	0.00195965	24	14	0.39598
TC1600001419.mm.2	Cldn1	1.26195e-05	0.00195965	24	0	1.13844
TC1900000018.mm.2	Chka	1.26195e-05	0.00195965	24	22	1.52912
TC0300002813.mm.2	Agl	1.51321e-05	0.00227043	24	12	0.367696
TC0600003601.mm.2	Foxp1	1.51321e-05	0.00227043	24	4	0.583363
TC0700000816.mm.2	Vrk3	1.51321e-05	0.00227043	24	8	0.431335
TC1500001088.mm.2	Tns2	1.51321e-05	0.00227043	24	8	1.0748
TC1600001304.mm.2	Prodh	1.51321e-05	0.00227043	24	18	0.615183
TC0300000180.mm.2	Slc2a2	1.76447e-05	0.00246427	24	12	0.459619
TC0400000580.mm.2	Slc44a1	1.76447e-05	0.00246427	24	22	0.434871
TC0400004127.mm.2	Fam213b	1.76447e-05	0.00246427	24	20	0.59397
TC0900000509.mm.2	Slc37a4	1.76447e-05	0.00246427	24	14	1.03238
TC0900001403.mm.2	Usp4	1.76447e-05	0.00246427	24	10	0.226274
TC0X00000319.mm.2	Lonrf3	1.76447e-05	0.00246427	24	20	1.393
TC1000002436.mm.2	Lrrc3	1.76447e-05	0.00246427	24	18	0.449013
TC1200000142.mm.2	Odc1	1.76447e-05	0.00246427	24	18	0.912168
TC1300000266.mm.2	Slc17a3	1.76447e-05	0.00246427	24	20	0.731856
TC1600000708.mm.2	Cd47	1.76447e-05	0.00246427	24	8	0.275772
TC1600001008.mm.2	Son	1.76447e-05	0.00246427	24	6	0.304056
TC0100002308.mm.2	Myo1b	2.10603e-05	0.00283433	24	22	0.383605
TC0700001005.mm.2	Ttc23	2.10603e-05	0.00283433	24	16	0.685894
TC0900003328.mm.2	Rsl24d1	2.10603e-05	0.00283433	24	16	0.289914
TC1000002695.mm.2	Amdhd1	2.10603e-05	0.00283433	24	2	0.639932
TC1400001930.mm.2	Gch1	2.10603e-05	0.00283433	24	8	0.579828
TC1900001213.mm.2	Vps13a	2.10603e-05	0.00283433	24	14	0.72832
TC0100002965.mm.2	Steap3	2.44758e-05	0.00298632	24	2	0.487904
TC0200001843.mm.2	Sord	2.44758e-05	0.00298632	24	14	0.268701
TC0400000212.mm.2	Ndufaf4	2.44758e-05	0.00298632	24	16	0.555079
TC0400003530.mm.2	Thrap3	2.44758e-05	0.00298632	24	6	0.491439
TC0500001572.mm.2	Abhd11	2.44758e-05	0.00298632	24	16	0.367696
TC0500002170.mm.2	Slc5a6	2.44758e-05	0.00298632	24	10	0.89449
TC0500002699.mm.2	Sult1d1	2.44758e-05	0.00298632	24	18	0.731856
TC0700000388.mm.2	Ethe1	2.44758e-05	0.00298632	24	0	0.961665
TC0700002931.mm.2	9830147E19Rik	2.44758e-05	0.00298632	24	14	0.491439
TC0700002974.mm.2	Atf5	2.44758e-05	0.00298632	24	4	0.779585
TC0700004474.mm.2	Bnip3	2.44758e-05	0.00298632	24	14	0.700036
TC0800001255.mm.2	Cdh1	2.44758e-05	0.00298632	24	0	0.463155
TC0800002552.mm.2	Scoc	2.44758e-05	0.00298632	24	18	0.459619
TC0900002332.mm.2	Nrg4	2.44758e-05	0.00298632	24	14	1.53796
TC1000003050.mm.2	Xpot	2.44758e-05	0.00298632	24	12	0.420729
TC1200002296.mm.2	Clmn	2.44758e-05	0.00298632	24	10	0.682358
TC1500001410.mm.2	Klf10	2.44758e-05	0.00298632	24	10	0.984646
TC0100002707.mm.2	C130026I21Rik; A530032D15Rik	2.90844e-05	0.00336379	24	4	0.367696
TC0200000740.mm.2	Kynu	2.90844e-05	0.00336379	24	2	0.479065
TC0500000740.mm.2	Polr2b	2.90844e-05	0.00336379	24	16	0.570989
TC0500001410.mm.2	Setd1b	2.90844e-05	0.00336379	24	8	0.608112
TC0500003000.mm.2	Ulk1	2.90844e-05	0.00336379	24	8	1.01293
TC0700004076.mm.2	St5	2.90844e-05	0.00336379	24	0	1.14198
TC0800001494.mm.2	Trappc2l	2.90844e-05	0.00336379	24	12	0.473762
TC1100002664.mm.2	Sqstm1	2.90844e-05	0.00336379	24	4	0.247487
TC1100003928.mm.2	Tex2	2.90844e-05	0.00336379	24	2	0.403051
TC1300001837.mm.2	Eef1e1	2.90844e-05	0.00336379	24	16	0.403051
TC0200000603.mm.2	Angptl2	3.36929e-05	0.00363197	24	12	0.367696
TC0200002067.mm.2	Plcb4	3.36929e-05	0.00363197	24	22	0.49851
TC0200003195.mm.2	Agpat2	3.36929e-05	0.00363197	24	20	0.703571
TC0200004229.mm.2	Caprin1	3.36929e-05	0.00363197	24	0	0.698268
TC0300000713.mm.2	Gpatch4	3.36929e-05	0.00363197	24	18	0.429567
TC0300001192.mm.2	Dbt	3.36929e-05	0.00363197	24	20	0.404819
TC0400003756.mm.2	Clic4	3.36929e-05	0.00363197	24	0	0.410122
TC0500000277.mm.2	Dnajb6	3.36929e-05	0.00363197	24	16	0.456084
TC0500001228.mm.2	Fam222a	3.36929e-05	0.00363197	24	0	0.655842
TC0700001723.mm.2	Anks4b	3.36929e-05	0.00363197	24	14	0.544472
TC1000001704.mm.2	Tab2	3.36929e-05	0.00363197	24	4	0.403051
TC1300000735.mm.2	Dapk1	3.36929e-05	0.00363197	24	0	0.71241
TC1400001039.mm.2	Gm21750	3.36929e-05	0.00363197	24	6	0.537401
TC1700000143.mm.2	Tcp1	3.36929e-05	0.00363197	24	16	0.486136
TC0300000322.mm.2	Jade1	3.98666e-05	0.00419563	24	8	0.724784
TC0600002616.mm.2	Gm4477	3.98666e-05	0.00419563	24	18	0.777817
TC0600003146.mm.2	Plekhg6	3.98666e-05	0.00419563	24	12	0.509117
TC1000002668.mm.2	Slc25a3	3.98666e-05	0.00419563	24	18	0.212132
TC1400000072.mm.2	Abhd6	3.98666e-05	0.00419563	24	18	0.576292
TC0100000097.mm.2	Rdh10	4.60402e-05	0.00456414	24	18	0.353553
TC0100003093.mm.2	Zbed6; Zc3h11a	4.60402e-05	0.00456414	24	10	0.381838
TC0400003747.mm.2	Tmem57	4.60402e-05	0.00456414	24	14	0.652306
TC0500000306.mm.2	Khk	4.60402e-05	0.00456414	24	18	0.574524
TC0600002966.mm.2	Tmcc1	4.60402e-05	0.00456414	24	16	0.816708
TC0700003719.mm.2	l7Rn6	4.60402e-05	0.00456414	24	20	0.491439
TC0800001867.mm.2	Slc25a15	4.60402e-05	0.00456414	24	22	0.270468
TC1100003161.mm.2	Aspa	4.60402e-05	0.00456414	24	18	0.470226
TC1100003462.mm.2	Ypel2	4.60402e-05	0.00456414	24	0	1.36825
TC1200001549.mm.2	Rnf144a	4.60402e-05	0.00456414	24	2	0.54624
TC1300002474.mm.2	Hmgcr	4.60402e-05	0.00456414	24	14	1.20738
TC1700000202.mm.2	Riok2	4.60402e-05	0.00456414	24	16	0.753069
TC1900000866.mm.2	Grk5	4.60402e-05	0.00456414	24	2	1.02884
TC0300002491.mm.2	Car14	5.42531e-05	0.00519286	24	22	0.491439
TC0600003019.mm.2	Wnt5b	5.42531e-05	0.00519286	24	16	0.77605
TC0700001800.mm.2	Sbk1	5.42531e-05	0.00519286	24	12	0.392444
TC0700003568.mm.2	Pex11a	5.42531e-05	0.00519286	24	16	0.558614
TC1300000016.mm.2	Akr1c14	5.42531e-05	0.00519286	24	14	0.657609
TC1600001553.mm.2	Dirc2	5.42531e-05	0.00519286	24	4	0.636396
TC1600001722.mm.2	Alcam	5.42531e-05	0.00519286	24	8	0.671751
TC1900000882.mm.2	Lrp5	5.42531e-05	0.00519286	24	2	0.572756
TC0200003698.mm.2	Abcb11	6.24659e-05	0.00561586	24	0	0.539169
TC0300001306.mm.2	Elovl6	6.24659e-05	0.00561586	24	14	1.47078
TC0500000536.mm.2	Slc34a2	6.24659e-05	0.00561586	24	0	0.852064
TC0700000488.mm.2	Dyrk1b	6.24659e-05	0.00561586	24	6	0.707107
TC1000003119.mm.2	Lrp1	6.24659e-05	0.00561586	24	6	0.26163
TC1100000383.mm.2	Pank3	6.24659e-05	0.00561586	24	12	0.305824
TC1100000850.mm.2	Sco1	6.24659e-05	0.00561586	24	16	0.383605
TC1100000902.mm.2	Aloxe3	6.24659e-05	0.00561586	24	2	0.339411
TC1100001206.mm.2	Psmd11	6.24659e-05	0.00561586	24	4	0.360624
TC1100002015.mm.2	Baiap2	6.24659e-05	0.00561586	24	20	0.669984
TC1100002897.mm.2	Shmt1	6.24659e-05	0.00561586	24	18	0.424264
TC1700002042.mm.2	Znrd1	6.24659e-05	0.00561586	24	18	0.459619
TC1700002686.mm.2	Mcfd2	6.24659e-05	0.00561586	24	20	0.434871
TC1800000301.mm.2	Egr1	6.24659e-05	0.00561586	24	4	1.35411
TC1900000636.mm.2	Abcc2	6.24659e-05	0.00561586	24	10	0.346482
TC0100001016.mm.2	Zcchc2	7.33184e-05	0.00628613	24	6	0.388909
TC0200000222.mm.2	Il15ra	7.33184e-05	0.00628613	24	10	0.576292
TC0300001382.mm.2	Ppp3ca	7.33184e-05	0.00628613	24	10	0.33234
TC0400003369.mm.2	Rnf220	7.33184e-05	0.00628613	24	4	0.357089
TC0400003653.mm.2	Epb41	7.33184e-05	0.00628613	24	10	0.4278
TC0600003045.mm.2	Atp6v1e1	7.33184e-05	0.00628613	24	12	0.247487
TC0700002166.mm.2	Ppp6r1	7.33184e-05	0.00628613	24	10	0.205061
TC1100000994.mm.2	Ggt6	7.33184e-05	0.00628613	24	20	0.54624
TC1100003369.mm.2	Rffl	7.33184e-05	0.00628613	24	8	0.342947
TC1300002766.mm.2	Nsun2	7.33184e-05	0.00628613	24	14	0.426032
TC1500001531.mm.2	Enpp2	7.33184e-05	0.00628613	24	14	0.532098
TC1800000924.mm.2	Crem	7.33184e-05	0.00628613	24	2	0.438406
TC0100003104.mm.2	Adora1	8.41708e-05	0.00677209	24	8	0.859135
TC0400001934.mm.2	Srm	8.41708e-05	0.00677209	24	16	1.19147
TC0400003330.mm.2	Uqcrh	8.41708e-05	0.00677209	24	20	0.240416
TC0500000699.mm.2	Rasl11b	8.41708e-05	0.00677209	24	20	0.595737
TC0500002944.mm.2	Atp5k	8.41708e-05	0.00677209	24	18	0.420729
TC0600000655.mm.2	Plekha8	8.41708e-05	0.00677209	24	16	0.678823
TC0600002635.mm.2	Pcyox1	8.41708e-05	0.00677209	24	18	0.441942
TC0900001400.mm.2	Rhoa	8.41708e-05	0.00677209	24	10	0.219203
TC0900003008.mm.2	Acy1	8.41708e-05	0.00677209	24	16	0.53033
TC1000002657.mm.2	Nr1h4	8.41708e-05	0.00677209	24	16	0.449013
TC1100001047.mm.2	Cluh	8.41708e-05	0.00677209	24	0	0.456084
TC1100001564.mm.2	Ppp1r1b	8.41708e-05	0.00677209	24	20	0.749533
TC1100001632.mm.2	Stat5a	8.41708e-05	0.00677209	24	2	0.477297
TC1700000496.mm.2	Cdkn1a	8.41708e-05	0.00677209	24	0	1.82787
TC1700001311.mm.2	Ttc7	8.41708e-05	0.00677209	24	12	0.56215
TC1700002656.mm.2	Lrpprc	8.41708e-05	0.00677209	24	14	0.353553
TC1800000994.mm.2	Npc1	8.41708e-05	0.00677209	24	10	0.555079
TC0100001351.mm.2	Ivns1abp	9.84181e-05	0.00756218	24	16	0.494975
TC0200000507.mm.2	Rapgef1	9.84181e-05	0.00756218	24	12	0.507349
TC0200001223.mm.2	Timm10	9.84181e-05	0.00756218	24	14	0.403051
TC0200004221.mm.2	Pdhx	9.84181e-05	0.00756218	24	12	0.360624
TC0200004251.mm.2	Prrg4	9.84181e-05	0.00756218	24	10	0.731856
TC0200004932.mm.2	Commd7	9.84181e-05	0.00756218	24	2	0.311127
TC0200005105.mm.2	Wfdc5	9.84181e-05	0.00756218	24	0	0.431335
TC0500000303.mm.2	Agbl5	9.84181e-05	0.00756218	24	8	0.516188
TC0500001464.mm.2	Aacs	9.84181e-05	0.00756218	24	14	2.02763
TC0800002516.mm.2	Mmaa	9.84181e-05	0.00756218	24	18	0.438406
TC1100004270.mm.2	Tlcd2	9.84181e-05	0.00756218	24	22	0.59397
TC1300000258.mm.2	Hist1h1c	9.84181e-05	0.00756218	24	20	1.21622
TC1900001506.mm.2	Pik3ap1	9.84181e-05	0.00756218	24	8	0.616951
TC0100000817.mm.2	Neu2	0.000112665	0.00801874	24	18	0.434871
TC0100002739.mm.2	Ncl	0.000112665	0.00801874	24	14	0.341179
TC0200001535.mm.2	Abtb2	0.000112665	0.00801874	24	22	0.806102
TC0200003080.mm.2	Arhgap21	0.000112665	0.00801874	24	12	0.502046
TC0200003753.mm.2	Gpr155	0.000112665	0.00801874	24	16	0.655842
TC0400002236.mm.2	Otud6b	0.000112665	0.00801874	24	16	0.311127
TC0600003145.mm.2	Ltbr	0.000112665	0.00801874	24	10	0.36416
TC0700004346.mm.2	Prss8	0.000112665	0.00801874	24	10	0.632861
TC0800002060.mm.2	Lonrf1	0.000112665	0.00801874	24	14	0.880348
TC0800002385.mm.2	Rfxank	0.000112665	0.00801874	24	22	0.997021
TC0900000922.mm.2	Bnip2	0.000112665	0.00801874	24	16	0.388909
TC0900002608.mm.2	Cgnl1	0.000112665	0.00801874	24	14	0.404819
TC1100001908.mm.2	Llgl2	0.000112665	0.00801874	24	0	0.586899
TC1100003224.mm.2	Serpinf2	0.000112665	0.00801874	24	6	0.346482
TC1100003993.mm.2	Fam20a	0.000112665	0.00801874	24	4	0.548008
TC1100004284.mm.2	Afmid	0.000112665	0.00801874	24	20	0.339411
TC1200000280.mm.2	Gdap10	0.000112665	0.00801874	24	10	0.721249
TC1200000576.mm.2	Atp5s	0.000112665	0.00801874	24	10	0.457852
TC1300002036.mm.2	Nop16	0.000112665	0.00801874	24	18	0.558614
TC1400001275.mm.2	Gpr180	0.000112665	0.00801874	24	16	0.477297
TC1500002265.mm.2	Gm5476	0.000112665	0.00801874	24	2	0.311127
TC1700000484.mm.2	Mapk14	0.000112665	0.00801874	24	16	0.537401
TC1700002788.mm.2	H2-Q8; H2-Q6	0.000112665	0.00801874	24	14	0.353553
TC0100002800.mm.2	Hes6	0.000131252	0.00907967	24	16	0.885651
TC0100003478.mm.2	Uck2	0.000131252	0.00907967	24	16	0.367696
TC0200001927.mm.2	Bcl2l11	0.000131252	0.00907967	24	10	0.470226
TC0700000972.mm.2	E030018B13Rik	0.000131252	0.00907967	24	18	0.671751
TC1000001577.mm.2	Sdr9c7	0.000131252	0.00907967	24	22	0.735391
TC1100002637.mm.2	Trim41	0.000131252	0.00907967	24	14	0.565685
TC1300000919.mm.2	Glrx	0.000131252	0.00907967	24	16	0.360624
TC1400001627.mm.2	Appl1	0.000131252	0.00907967	24	0	0.381838
TC1500001870.mm.2	Tmem184b	0.000131252	0.00907967	24	10	0.357089
TC0300000640.mm.2	Fgg	0.000149838	0.0098733	24	4	0.113137
TC0300002230.mm.2	Fgb	0.000149838	0.0098733	24	6	0.159099
TC0400003894.mm.2	Efhd2	0.000149838	0.0098733	24	12	0.608112
TC0600000648.mm.2	Chn2	0.000149838	0.0098733	24	12	0.289914
TC0600000698.mm.2	Lancl2	0.000149838	0.0098733	24	8	0.452548
TC0800001420.mm.2	Osgin1	0.000149838	0.0098733	24	4	0.707107
TC0800002702.mm.2	Ces1d	0.000149838	0.0098733	24	18	0.489671
TC0X00002307.mm.2	Atp11c	0.000149838	0.0098733	24	8	0.236881
TC1000002330.mm.2	1700040L02Rik	0.000149838	0.0098733	24	8	0.795495
TC1100001580.mm.2	Thra	0.000149838	0.0098733	24	0	0.399515
TC1100002157.mm.2	Gck	0.000149838	0.0098733	24	16	0.866206
TC1200000503.mm.2	Ctage5	0.000149838	0.0098733	24	12	0.268701
TC1300000009.mm.2	Asb13	0.000149838	0.0098733	24	22	0.523259
TC1700001265.mm.2	Abcg8	0.000149838	0.0098733	24	8	0.989949
TC1700002526.mm.2	Xdh	0.000149838	0.0098733	24	14	0.328805
TC1800000891.mm.2	Fbxo15	0.000149838	0.0098733	24	0	0.341179
TC0100000711.mm.2	Agfg1	0.000173937	0.0107589	24	10	0.236881
TC0100001757.mm.2	Hhipl2	0.000173937	0.0107589	24	4	0.452548
TC0200003607.mm.2	Rbms1	0.000173937	0.0107589	24	8	0.735391
TC0200004241.mm.2	Hipk3; Mir1902	0.000173937	0.0107589	24	10	0.346482
TC0300000747.mm.2	Pklr	0.000173937	0.0107589	24	14	0.882116
TC0300000967.mm.2	Fmo5	0.000173937	0.0107589	24	18	0.494975
TC0400002549.mm.2	Gne	0.000173937	0.0107589	24	10	0.486136
TC0400002636.mm.2	Baat	0.000173937	0.0107589	24	22	0.30052
TC0500003625.mm.2	Urad	0.000173937	0.0107589	24	16	0.33234
TC0700002078.mm.2	Lsp1	0.000173937	0.0107589	24	8	0.254558
TC0800000737.mm.2	Nr2c2ap	0.000173937	0.0107589	24	18	0.378302
TC0900002991.mm.2	Atp2c1	0.000173937	0.0107589	24	14	0.293449
TC1000000903.mm.2	Aes	0.000173937	0.0107589	24	22	0.240416
TC1100004248.mm.2	Ogfod3	0.000173937	0.0107589	24	12	0.296985
TC1300000102.mm.2	AW209491	0.000173937	0.0107589	24	18	0.459619
TC1300000834.mm.2	Gm7969	0.000173937	0.0107589	24	2	0.505581
TC1400001676.mm.2	Sh3bp5	0.000173937	0.0107589	24	20	0.342947
TC1600000443.mm.2	Pcyt1a	0.000173937	0.0107589	24	16	0.433103
TC1900000008.mm.2	Cpt1a	0.000173937	0.0107589	24	10	0.650538
TC1900000320.mm.2	Nmrk1	0.000173937	0.0107589	24	14	1.00409
TC1900000705.mm.2	Sfxn2	0.000173937	0.0107589	24	20	0.367696
TC1900001621.mm.2	Usmg5	0.000173937	0.0107589	24	20	0.247487
TC0100002544.mm.2	Fn1	0.000198036	0.0114819	24	8	0.194454
TC0200001951.mm.2	Slc20a1	0.000198036	0.0114819	24	12	0.940452
TC0200003701.mm.2	Fastkd1	0.000198036	0.0114819	24	14	0.369463
TC0200004953.mm.2	Ahcy; Gm4737	0.000198036	0.0114819	24	18	0.240416
TC0300000060.mm.2	Fabp5	0.000198036	0.0114819	24	8	0.79196
TC0500001113.mm.2	Fgfrl1	0.000198036	0.0114819	24	10	0.583363
TC0500001590.mm.2	Hspb1	0.000198036	0.0114819	24	18	1.41068
TC0700000439.mm.2	Cyp2a4	0.000198036	0.0114819	24	14	1.15612
TC0700001198.mm.2	Stard5	0.000198036	0.0114819	24	14	0.410122
TC0700001715.mm.2	Acsm3	0.000198036	0.0114819	24	14	0.346482
TC0700003769.mm.2	Aqp11	0.000198036	0.0114819	24	14	0.643467
TC0700003988.mm.2	Rrp8	0.000198036	0.0114819	24	16	0.59397
TC0900000737.mm.2	Nptn	0.000198036	0.0114819	24	14	0.226274
TC0900001414.mm.2	Impdh2	0.000198036	0.0114819	24	16	0.459619
TC1000002538.mm.2	Hmg20b	0.000198036	0.0114819	24	16	0.268701
TC1300002445.mm.2	Scamp1	0.000198036	0.0114819	24	10	0.618718
TC1500000298.mm.2	Fzd6	0.000198036	0.0114819	24	6	0.537401
TC1500002075.mm.2	Abcd2	0.000198036	0.0114819	24	10	0.745998
TC1600000190.mm.2	Prkdc	0.000198036	0.0114819	24	16	0.388909
TC1600000650.mm.2	Naa50	0.000198036	0.0114819	24	14	0.420729
TC1600001805.mm.2	Crybg3	0.000198036	0.0114819	24	18	0.558614
TC1800001139.mm.2	Nrep	0.000198036	0.0114819	24	14	1.1738
TC1900000250.mm.2	Glyat	0.000198036	0.0114819	24	14	0.247487
TC1900001253.mm.2	Gda	0.000198036	0.0114819	24	18	0.53033
TC0100001207.mm.2	Etnk2	0.000229097	0.0126551	24	16	0.502046
TC0100003513.mm.2	Atf6	0.000229097	0.0126551	24	10	0.205061
TC0300002488.mm.2	Mrps21	0.000229097	0.0126551	24	18	0.452548
TC0400000698.mm.2	Slc31a1	0.000229097	0.0126551	24	16	0.222739
TC0400001510.mm.2	Rnf19b	0.000229097	0.0126551	24	8	0.544472
TC0500002415.mm.2	Sepsecs	0.000229097	0.0126551	24	14	0.309359
TC0600003603.mm.2	Grcc10	0.000229097	0.0126551	24	18	0.385373
TC0800000854.mm.2	Nr3c2	0.000229097	0.0126551	24	10	0.678823
TC0900001462.mm.2	Kif9	0.000229097	0.0126551	24	2	0.328805
TC0900003249.mm.2	Gorasp1	0.000229097	0.0126551	24	16	0.459619
TC0X00001781.mm.2	Magix	0.000229097	0.0126551	24	0	0.452548
TC1000002239.mm.2	Sgpl1	0.000229097	0.0126551	24	0	0.445477
TC1000002496.mm.2	Pcsk4	0.000229097	0.0126551	24	12	0.595737
TC1100003334.mm.2	Utp6	0.000229097	0.0126551	24	20	0.288146
TC1100003610.mm.2	Atp5g1	0.000229097	0.0126551	24	20	0.41189
TC1200000500.mm.2	Pnn	0.000229097	0.0126551	24	16	0.254558
TC1300001604.mm.2	Vmn1r210	0.000229097	0.0126551	24	0	0.629325
TC1300002360.mm.2	Polr3g	0.000229097	0.0126551	24	18	0.502046
TC1700000573.mm.2	Zfp563	0.000229097	0.0126551	24	16	0.374767
TC0100002690.mm.2	Pid1	0.000260159	0.0136898	24	2	0.509117
TC0100003125.mm.2	Timm17a	0.000260159	0.0136898	24	14	0.265165
TC0300000491.mm.2	P2ry1	0.000260159	0.0136898	24	14	0.544472
TC0300000550.mm.2	Gfm1	0.000260159	0.0136898	24	18	0.219203
TC0300002242.mm.2	Trim2	0.000260159	0.0136898	24	0	0.890955
TC0400002980.mm.2	Plin2	0.000260159	0.0136898	24	2	0.424264
TC0700001203.mm.2	Mesdc2	0.000260159	0.0136898	24	18	0.519723
TC0900002503.mm.2	Hacd3	0.000260159	0.0136898	24	14	0.346482
TC1000000246.mm.2	Ptprk	0.000260159	0.0136898	24	4	0.381838
TC1000001024.mm.2	Rfx4	0.000260159	0.0136898	24	2	0.717713
TC1100001425.mm.2	Spag9	0.000260159	0.0136898	24	10	0.296985
TC1100002100.mm.2	4921536K21Rik	0.000260159	0.0136898	24	4	0.365928
TC1100003997.mm.2	Abca8b	0.000260159	0.0136898	24	4	0.39598
TC1200000798.mm.2	Acot1	0.000260159	0.0136898	24	20	1.10662
TC1300000623.mm.2	Sfxn1	0.000260159	0.0136898	24	18	0.277539
TC1500000605.mm.2	Gpt	0.000260159	0.0136898	24	18	0.452548
TC1600000335.mm.2	St6gal1	0.000260159	0.0136898	24	8	0.852064
TC1800001227.mm.2	Pcdh1	0.000260159	0.0136898	24	4	0.49851
TC1900000206.mm.2	Vwce	0.000260159	0.0136898	24	10	0.56215
TC1900000527.mm.2	44260	0.000260159	0.0136898	24	12	0.233345
TC0100000794.mm.2	Dis3l2	0.000299964	0.0150361	24	10	0.289914
TC0100003402.mm.2	Fmo2	0.000299964	0.0150361	24	14	0.505581
TC0100003639.mm.2	Adss	0.000299964	0.0150361	24	18	0.219203
TC0200000007.mm.2	Phxr1	0.000299964	0.0150361	24	8	0.597505
TC0200005378.mm.2	Gm14326	0.000299964	0.0150361	24	16	0.34825
TC0400001274.mm.2	Eif2b3	0.000299964	0.0150361	24	14	0.473762
TC0400001970.mm.2	Slc2a5	0.000299964	0.0150361	24	12	0.806102
TC0400002479.mm.2	Sigmar1	0.000299964	0.0150361	24	2	0.434871
TC0500000819.mm.2	Slc4a4	0.000299964	0.0150361	24	6	0.770746
TC0500001408.mm.2	Tmem120b	0.000299964	0.0150361	24	12	0.576292
TC0600001238.mm.2	Thumpd3	0.000299964	0.0150361	24	16	0.362392
TC0600002013.mm.2	Lncpint	0.000299964	0.0150361	24	8	0.984646
TC0600002214.mm.2	Zfp786	0.000299964	0.0150361	24	18	0.678823
TC0700002053.mm.2	Pnpla2	0.000299964	0.0150361	24	8	0.747765
TC0800001925.mm.2	Hgsnat	0.000299964	0.0150361	24	16	0.344715
TC0800003076.mm.2	Aprt	0.000299964	0.0150361	24	14	0.367696
TC1000002509.mm.2	Mknk2	0.000299964	0.0150361	24	12	0.523259
TC1100002225.mm.2	Ddc	0.000299964	0.0150361	24	22	1.1738
TC1300002116.mm.2	Agtpbp1; A230056J06Rik	0.000299964	0.0150361	24	20	0.643467
TC1400000574.mm.2	Pnp	0.000299964	0.0150361	24	0	0.882116
TC1700000500.mm.2	BC004004	0.000299964	0.0150361	24	2	0.350018
TC0200000503.mm.2	Med27	0.000339769	0.0159512	24	18	0.34825
TC0200001053.mm.2	Zak	0.000339769	0.0159512	24	8	0.304056
TC0200002719.mm.2	Gm14288; Gm14440	0.000339769	0.0159512	24	16	0.457852
TC0200002737.mm.2	Gm14288; Gm14435	0.000339769	0.0159512	24	16	0.457852
TC0300002311.mm.2	Slc25a44	0.000339769	0.0159512	24	16	0.502046
TC0400001017.mm.2	Ube2u	0.000339769	0.0159512	24	0	0.841457
TC0400003814.mm.2	Alpl	0.000339769	0.0159512	24	16	0.804334
TC0400004058.mm.2	H6pd	0.000339769	0.0159512	24	4	0.503814
TC0600000012.mm.2	Casd1	0.000339769	0.0159512	24	2	0.215668
TC0600001252.mm.2	Il17rc	0.000339769	0.0159512	24	18	0.484368
TC0700000445.mm.2	Cyp2a5; Cyp2a4	0.000339769	0.0159512	24	16	0.959897
TC0700002498.mm.2	Tomm40	0.000339769	0.0159512	24	16	0.339411
TC0700003765.mm.2	Aamdc	0.000339769	0.0159512	24	14	0.540937
TC0800001307.mm.2	Tat	0.000339769	0.0159512	24	20	0.403051
TC0900000358.mm.2	Tmem218	0.000339769	0.0159512	24	4	0.44371
TC0900001349.mm.2	Pcbp4	0.000339769	0.0159512	24	8	0.668216
TC0X00000131.mm.2	Mid1ip1	0.000339769	0.0159512	24	16	0.855599
TC0X00003308.mm.2	Txlng	0.000339769	0.0159512	24	18	0.240416
TC1100001345.mm.2	Mtmr4	0.000339769	0.0159512	24	20	0.615183
TC1100003687.mm.2	Med24	0.000339769	0.0159512	24	2	0.410122
TC1200000203.mm.2	Rrm2	0.000339769	0.0159512	24	14	0.615183
TC1200001971.mm.2	Atp6v1d	0.000339769	0.0159512	24	16	0.56215
TC1300002269.mm.2	Mtrr	0.000339769	0.0159512	24	18	0.424264
TC1300002274.mm.2	Papd7	0.000339769	0.0159512	24	14	0.509117
TC1300002463.mm.2	Iqgap2	0.000339769	0.0159512	24	14	0.176777
TC1600000038.mm.2	Mgrn1	0.000339769	0.0159512	24	10	0.431335
TC1600002177.mm.2	Dexi	0.000339769	0.0159512	24	22	0.62579
TC1700000355.mm.2	Igfals	0.000339769	0.0159512	24	18	0.403051
TC1900000343.mm.2	Gm3443	0.000339769	0.0159512	24	0	0.53033
TC1900000610.mm.2	Marveld1	0.000339769	0.0159512	24	14	0.903329
TC0100000395.mm.2	Hspe1	0.000390493	0.0175888	24	20	0.350018
TC0100002354.mm.2	Hspd1	0.000390493	0.0175888	24	18	0.342947
TC0200001377.mm.2	Lrp4	0.000390493	0.0175888	24	12	0.479065
TC0400000349.mm.2	Dnaja1; Mir207	0.000390493	0.0175888	24	18	0.502046
TC0500000050.mm.2	Abcb1a	0.000390493	0.0175888	24	14	0.753069
TC0500000896.mm.2	Ccng2	0.000390493	0.0175888	24	2	1.00232
TC0600002056.mm.2	Wdr91	0.000390493	0.0175888	24	2	0.516188
TC0600002668.mm.2	Cnbp	0.000390493	0.0175888	24	20	0.259862
TC0800000424.mm.2	Ppp1r3b	0.000390493	0.0175888	24	18	2.06122
TC0800002008.mm.2	Ubxn8	0.000390493	0.0175888	24	10	0.311127
TC0900001377.mm.2	Ifrd2	0.000390493	0.0175888	24	16	0.408354
TC0900002969.mm.2	Cdv3	0.000390493	0.0175888	24	14	0.247487
TC1000003226.mm.2	Gstt3	0.000390493	0.0175888	24	20	0.735391
TC1300000020.mm.2	Akr1c19	0.000390493	0.0175888	24	14	0.62579
TC1300002126.mm.2	Zcchc6	0.000390493	0.0175888	24	6	0.311127
TC1400002310.mm.2	Slc25a37	0.000390493	0.0175888	24	14	0.457852
TC1600001667.mm.2	Phldb2	0.000390493	0.0175888	24	10	0.369463
TC1600002168.mm.2	Vasn	0.000390493	0.0175888	24	2	0.339411
TC1800001054.mm.2	Garem	0.000390493	0.0175888	24	8	0.406586
TC1900000432.mm.2	Rcl1	0.000390493	0.0175888	24	8	0.463155
TC0100000655.mm.2	Stk16	0.000441217	0.0189877	24	18	0.289914
TC0200002721.mm.2	Gm14436; Gm8923	0.000441217	0.0189877	24	16	0.502046
TC0200003362.mm.2	Stom	0.000441217	0.0189877	24	6	0.452548
TC0300000307.mm.2	Hspa4l	0.000441217	0.0189877	24	18	1.11016
TC0300000641.mm.2	Fga	0.000441217	0.0189877	24	6	0.169706
TC0300000675.mm.2	Sh3d19	0.000441217	0.0189877	24	8	0.413657
TC0400003116.mm.2	Tm2d1	0.000441217	0.0189877	24	10	0.304056
TC0500001401.mm.2	P2rx4	0.000441217	0.0189877	24	10	0.767211
TC0600000131.mm.2	Met	0.000441217	0.0189877	24	10	0.314663
TC0600000591.mm.2	Mpp6	0.000441217	0.0189877	24	20	0.233345
TC0600002240.mm.2	Tra2a	0.000441217	0.0189877	24	22	0.639932
TC0800001038.mm.2	Cyld	0.000441217	0.0189877	24	10	0.388909
TC0900001418.mm.2	Slc25a20	0.000441217	0.0189877	24	18	0.328805
TC0900003204.mm.2	Rbms3	0.000441217	0.0189877	24	6	0.360624
TC0900003276.mm.2	Cyp8b1	0.000441217	0.0189877	24	0	0.707107
TC1000002258.mm.2	Supv3l1	0.000441217	0.0189877	24	14	0.473762
TC1000002535.mm.2	Tjp3	0.000441217	0.0189877	24	22	0.837922
TC1000002727.mm.2	Mrpl42	0.000441217	0.0189877	24	16	0.219203
TC1100001853.mm.2	Sox9	0.000441217	0.0189877	24	22	0.724784
TC1200000788.mm.2	Rbm25	0.000441217	0.0189877	24	14	0.509117
TC1300001509.mm.2	Yae1d1	0.000441217	0.0189877	24	18	0.339411
TC1300001784.mm.2	Slc22a23	0.000441217	0.0189877	24	12	0.31643
TC1400000200.mm.2	Vdac2	0.000441217	0.0189877	24	14	0.243952
TC0200000843.mm.2	Arl6ip6	0.000505505	0.0207108	24	10	0.289914
TC0200002152.mm.2	Dtd1	0.000505505	0.0207108	24	2	0.321734
TC0200002753.mm.2	Gm14327	0.000505505	0.0207108	24	16	0.480833
TC0200005114.mm.2	Sdc4	0.000505505	0.0207108	24	6	0.404819
TC0300000161.mm.2	Tnfsf10	0.000505505	0.0207108	24	18	0.46669
TC0300001149.mm.2	Taf13	0.000505505	0.0207108	24	20	0.463155
TC0400001413.mm.2	Rragc	0.000505505	0.0207108	24	10	0.279307
TC0500001301.mm.2	Nos1	0.000505505	0.0207108	24	14	0.190919
TC0500002754.mm.2	Sdad1	0.000505505	0.0207108	24	14	0.420729
TC0500002770.mm.2	Ccni	0.000505505	0.0207108	24	4	0.199758
TC0600002548.mm.2	Pole4	0.000505505	0.0207108	24	20	0.459619
TC0700002526.mm.2	Vmn1r111	0.000505505	0.0207108	24	0	0.509117
TC0700003831.mm.2	P2ry2	0.000505505	0.0207108	24	12	0.57806
TC0800000976.mm.2	2310036O22Rik	0.000505505	0.0207108	24	0	0.233345
TC0800001410.mm.2	Hsd17b2	0.000505505	0.0207108	24	4	0.418961
TC0800002012.mm.2	Rbpms	0.000505505	0.0207108	24	6	0.62579
TC0900001399.mm.2	Amt	0.000505505	0.0207108	24	2	0.647003
TC1000001768.mm.2	Phactr2	0.000505505	0.0207108	24	10	0.362392
TC1100003559.mm.2	Luc7l3	0.000505505	0.0207108	24	20	0.339411
TC1400000502.mm.2	Cgrrf1	0.000505505	0.0207108	24	16	0.289914
TC1500001412.mm.2	Azin1	0.000505505	0.0207108	24	12	0.433103
TC1600000988.mm.2	Mrap	0.000505505	0.0207108	24	20	0.579828
TC1800000665.mm.2	Nedd4l	0.000505505	0.0207108	24	0	0.756604
TC1800000851.mm.2	Txnl4a	0.000505505	0.0207108	24	16	0.4826
TC1900000335.mm.2	Aldh1a1	0.000505505	0.0207108	24	20	0.183848
TC1900000797.mm.2	Casp7	0.000505505	0.0207108	24	14	0.494975
TC0100000633.mm.2	Ctdsp1	0.000569792	0.0220817	24	8	0.46669
TC0200001575.mm.2	Gm11060	0.000569792	0.0220817	24	4	0.46669
TC0200002013.mm.2	Pank2	0.000569792	0.0220817	24	10	0.226274
TC0200002587.mm.2	Slc9a8	0.000569792	0.0220817	24	8	0.30052
TC0200002720.mm.2	Gm14431; Gm8898	0.000569792	0.0220817	24	16	0.494975
TC0200002738.mm.2	Gm8898; Gm14431	0.000569792	0.0220817	24	16	0.494975
TC0200005341.mm.2	Gm14431; Gm8898	0.000569792	0.0220817	24	16	0.494975
TC0500002642.mm.2	Ppat	0.000569792	0.0220817	24	14	0.583363
TC0600001193.mm.2	Itpr1	0.000569792	0.0220817	24	14	0.374767
TC0700000319.mm.2	Vmn1r100	0.000569792	0.0220817	24	4	0.491439
TC0700000340.mm.2	Vmn1r148	0.000569792	0.0220817	24	4	0.491439
TC0700000430.mm.2	Cyp2b10	0.000569792	0.0220817	24	20	1.05005
TC0700004508.mm.2	Bet1l	0.000569792	0.0220817	24	16	0.548008
TC0900001764.mm.2	Gm17571	0.000569792	0.0220817	24	2	0.480833
TC0900002604.mm.2	Aqp9	0.000569792	0.0220817	24	8	0.452548
TC0X00001071.mm.2	Pgk1	0.000569792	0.0220817	24	20	0.318198
TC1000001084.mm.2	Arl1	0.000569792	0.0220817	24	14	0.242184
TC1100000722.mm.2	Jmjd4	0.000569792	0.0220817	24	14	0.410122
TC1100002869.mm.2	Srebf1; Mir6922	0.000569792	0.0220817	24	14	0.899793
TC1100004250.mm.2	Wdr45b	0.000569792	0.0220817	24	10	0.312895
TC1200000201.mm.2	Klf11	0.000569792	0.0220817	24	6	0.710642
TC1200000239.mm.2	Tssc1	0.000569792	0.0220817	24	22	0.26163
TC1200001237.mm.2	Tnfaip2	0.000569792	0.0220817	24	0	0.463155
TC1400000575.mm.2	Pnp2	0.000569792	0.0220817	24	0	0.565685
TC1400000829.mm.2	Fgf9	0.000569792	0.0220817	24	0	0.325269
TC1500001822.mm.2	Txn2	0.000569792	0.0220817	24	18	0.26163
TC1500001831.mm.2	Tst	0.000569792	0.0220817	24	20	0.254558
TC1500002318.mm.2	Itga5	0.000569792	0.0220817	24	20	0.350018
TC1700000047.mm.2	Synj2	0.000569792	0.0220817	24	10	0.615183
TC1700001855.mm.2	Zfp870	0.000569792	0.0220817	24	18	0.537401
TC1800001138.mm.2	Stard4	0.000569792	0.0220817	24	12	0.56215
TC0100002319.mm.2	Nab1	0.000650836	0.024168	24	8	0.376534
TC0400001147.mm.2	Zcchc11	0.000650836	0.024168	24	10	0.420729
TC0400002434.mm.2	Ddx58	0.000650836	0.024168	24	6	0.243952
TC0400002790.mm.2	Hdhd3	0.000650836	0.024168	24	18	0.583363
TC0400003437.mm.2	Ctps	0.000650836	0.024168	24	18	0.441942
TC0500000075.mm.2	Gm6460	0.000650836	0.024168	24	4	0.56215
TC0500001663.mm.2	Fam20c	0.000650836	0.024168	24	14	0.441942
TC0700000374.mm.2	Zfp108	0.000650836	0.024168	24	20	0.22981
TC0900001785.mm.2	4931406C07Rik	0.000650836	0.024168	24	18	0.275772
TC0900003004.mm.2	Alas1	0.000650836	0.024168	24	14	1.48139
TC0X00000897.mm.2	Apoo; Apoo-ps	0.000650836	0.024168	24	16	0.279307
TC1000001374.mm.2	Mdm1	0.000650836	0.024168	24	20	0.275772
TC1100000543.mm.2	Cby3	0.000650836	0.024168	24	4	0.19799
TC1100001587.mm.2	Rara	0.000650836	0.024168	24	8	0.339411
TC1100002155.mm.2	Pold2	0.000650836	0.024168	24	12	0.215668
TC1100002654.mm.2	Btnl9	0.000650836	0.024168	24	20	0.49851
TC1200001051.mm.2	Glrx5	0.000650836	0.024168	24	16	0.304056
TC1500000705.mm.2	Tnrc6b; Mir5113	0.000650836	0.024168	24	4	0.353553
TC1700001838.mm.2	Akap8	0.000650836	0.024168	24	16	0.254558
TC1700002191.mm.2	Rpl7l1	0.000650836	0.024168	24	18	0.275772
TC1800001595.mm.2	Lipg	0.000650836	0.024168	24	14	0.770746
TC1900000127.mm.2	Ppp1r14b	0.000650836	0.024168	24	16	0.636396
TC1900000693.mm.2	Tmem180	0.000650836	0.024168	24	2	0.438406
TC1900001419.mm.2	Lipa	0.000650836	0.024168	24	22	0.321734
TC1900001511.mm.2	Frat2	0.000650836	0.024168	24	2	0.399515
TC0100003872.mm.2	Irf6	0.00073188	0.0259619	24	2	0.438406
TC0200000994.mm.2	Cers6	0.00073188	0.0259619	24	12	0.500278
TC0200001006.mm.2	Dhrs9	0.00073188	0.0259619	24	0	0.735391
TC0200004619.mm.2	Idh3b	0.00073188	0.0259619	24	18	0.212132
TC0200005334.mm.2	Gm14391; Gm6710	0.00073188	0.0259619	24	16	0.321734
TC0300000786.mm.2	Crtc2	0.00073188	0.0259619	24	6	0.572756
TC0500000052.mm.2	Abcb1b	0.00073188	0.0259619	24	12	0.629325
TC0500001338.mm.2	Slc8b1	0.00073188	0.0259619	24	6	1.12076
TC0700001774.mm.2	Aqp8	0.00073188	0.0259619	24	22	1.35057
TC0700004666.mm.2	Fgfr2	0.00073188	0.0259619	24	6	0.59397
TC0800002145.mm.2	Fam149a	0.00073188	0.0259619	24	2	0.319966
TC0800002529.mm.2	Gab1	0.00073188	0.0259619	24	12	0.289914
TC0900003300.mm.2	Cdcp1	0.00073188	0.0259619	24	20	0.434871
TC1000001044.mm.2	Timp3	0.00073188	0.0259619	24	14	0.611647
TC1100000205.mm.2	Peli1	0.00073188	0.0259619	24	2	0.335876
TC1100003318.mm.2	Wsb1	0.00073188	0.0259619	24	4	0.678823
TC1100003948.mm.2	Pitpnc1	0.00073188	0.0259619	24	12	0.291682
TC1100003990.mm.2	Slc16a6	0.00073188	0.0259619	24	22	0.76014
TC1200001869.mm.2	Sos2	0.00073188	0.0259619	24	10	0.374767
TC1200001908.mm.2	Dhrs7	0.00073188	0.0259619	24	16	0.406586
TC1300000089.mm.2	Lyst	0.00073188	0.0259619	24	16	0.362392
TC1400000318.mm.2	Nek4	0.00073188	0.0259619	24	0	0.371231
TC1400002430.mm.2	Slc25a30	0.00073188	0.0259619	24	4	0.989949
TC1500000599.mm.2	Adck5	0.00073188	0.0259619	24	2	0.714178
TC1600000097.mm.2	1810013L24Rik	0.00073188	0.0259619	24	8	0.365928
TC1900001346.mm.2	Ermp1	0.00073188	0.0259619	24	14	0.484368
TC1900001485.mm.2	Sorbs1	0.00073188	0.0259619	24	8	0.784889
TC4_JH584294_random00000008.mm.2	Gm2023; Ccl19	0.00073188	0.0259619	24	6	0.381838
TC0200001564.mm.2	Cstf3	0.000833521	0.0286077	24	18	0.459619
TC0200002729.mm.2	Gm6710; Gm14391	0.000833521	0.0286077	24	16	0.33234
TC0200005489.mm.2	Gm14306	0.000833521	0.0286077	24	16	0.420729
TC0300002453.mm.2	Cgn	0.000833521	0.0286077	24	22	0.57806
TC0300003139.mm.2	Dnajb4	0.000833521	0.0286077	24	16	0.53033
TC0400001070.mm.2	Oma1	0.000833521	0.0286077	24	18	0.431335
TC0400003773.mm.2	Pnrc2	0.000833521	0.0286077	24	0	0.304056
TC0500000876.mm.2	Fam47e	0.000833521	0.0286077	24	16	0.774282
TC0500001578.mm.2	Baz1b	0.000833521	0.0286077	24	16	0.415425
TC0500002420.mm.2	Sel1l3	0.000833521	0.0286077	24	8	0.424264
TC0500002486.mm.2	Ugdh	0.000833521	0.0286077	24	10	0.296985
TC0500002919.mm.2	Tgfbr3	0.000833521	0.0286077	24	10	0.367696
TC0700000236.mm.2	Slc1a5	0.000833521	0.0286077	24	12	0.477297
TC0700000513.mm.2	Hnrnpl	0.000833521	0.0286077	24	6	0.318198
TC0800000449.mm.2	6430573F11Rik	0.000833521	0.0286077	24	0	0.749533
TC0X00000704.mm.2	Rpl10; Snora70	0.000833521	0.0286077	24	18	0.155563
TC0X00001286.mm.2	Armcx1	0.000833521	0.0286077	24	16	0.311127
TC1000000015.mm.2	Mthfd1l	0.000833521	0.0286077	24	12	0.360624
TC1100001331.mm.2	Trim37	0.000833521	0.0286077	24	20	0.289914
TC1300001419.mm.2	Gtpbp4	0.000833521	0.0286077	24	16	0.390676
TC1400000465.mm.2	Gm8232; Gm21991	0.000833521	0.0286077	24	4	0.505581
TC0100000237.mm.2	Hs6st1	0.000935162	0.0305835	24	12	0.505581
TC0200002170.mm.2	Naa20	0.000935162	0.0305835	24	16	0.431335
TC0200003280.mm.2	Tor1a	0.000935162	0.0305835	24	14	0.243952
TC0200003656.mm.2	Cobll1	0.000935162	0.0305835	24	10	0.328805
TC0200004560.mm.2	Zfp661	0.000935162	0.0305835	24	18	0.459619
TC0200005342.mm.2	Gm14440; Gm14288	0.000935162	0.0305835	24	16	0.438406
TC0300002451.mm.2	BC021767	0.000935162	0.0305835	24	22	0.477297
TC0300002620.mm.2	Nr1h5	0.000935162	0.0305835	24	12	0.523259
TC0400000018.mm.2	Chchd7	0.000935162	0.0305835	24	16	0.403051
TC0400001523.mm.2	Bsdc1	0.000935162	0.0305835	24	4	0.220971
TC0400002437.mm.2	Ndufb6	0.000935162	0.0305835	24	18	0.445477
TC0400004026.mm.2	Tardbp	0.000935162	0.0305835	24	22	0.282843
TC0500003371.mm.2	Gtf2ird1	0.000935162	0.0305835	24	2	0.484368
TC0600002315.mm.2	Fkbp14	0.000935162	0.0305835	24	20	0.470226
TC0700001814.mm.2	Mapk3	0.000935162	0.0305835	24	8	0.328805
TC0700002507.mm.2	Pvr	0.000935162	0.0305835	24	8	0.629325
TC0800000889.mm.2	Gypa	0.000935162	0.0305835	24	18	0.447245
TC0800001883.mm.2	Gpat4	0.000935162	0.0305835	24	16	0.447245
TC0900000786.mm.2	Anp32a	0.000935162	0.0305835	24	22	0.616951
TC0Y00000565.mm.2	Gm20854	0.000935162	0.0305835	24	4	0.53033
TC1100000496.mm.2	Ifi47; Olfr56	0.000935162	0.0305835	24	4	0.318198
TC1300000990.mm.2	Ccnh	0.000935162	0.0305835	24	20	0.212132
TC1400001531.mm.2	Ecd	0.000935162	0.0305835	24	18	0.190919
TC1400001673.mm.2	Phf7	0.000935162	0.0305835	24	14	0.381838
TC1400001687.mm.2	Ankrd28	0.000935162	0.0305835	24	14	0.268701
TC1500000704.mm.2	Fam83f	0.000935162	0.0305835	24	18	0.463155
TC1500002295.mm.2	Npff; Atf7	0.000935162	0.0305835	24	10	0.275772
TC1600001213.mm.2	Rsl1d1	0.000935162	0.0305835	24	16	0.473762
TC1700001299.mm.2	Epas1	0.000935162	0.0305835	24	10	0.346482
TC1900000373.mm.2	Klf9	0.000935162	0.0305835	24	6	0.947523
TC1900000568.mm.2	Cyp2c50	0.000935162	0.0305835	24	20	0.205061
TC1900001498.mm.2	Blnk	0.000935162	0.0305835	24	12	0.463155
TC0100000925.mm.2	Agxt	0.00106199	0.0331682	24	6	0.49851
TC0100001756.mm.2	Taf1a	0.00106199	0.0331682	24	14	0.353553
TC0100002838.mm.2	Dtymk	0.00106199	0.0331682	24	18	0.251023
TC0200000490.mm.2	Tsc1	0.00106199	0.0331682	24	8	0.590434
TC0200004163.mm.2	Ext2	0.00106199	0.0331682	24	4	0.141421
TC0200005438.mm.2	Helz2	0.00106199	0.0331682	24	2	0.441942
TC0300001236.mm.2	F3	0.00106199	0.0331682	24	10	0.406586
TC0300002481.mm.2	Adamtsl4	0.00106199	0.0331682	24	2	0.362392
TC0400001047.mm.2	Pde4b	0.00106199	0.0331682	24	6	0.707107
TC0400002531.mm.2	Gba2	0.00106199	0.0331682	24	12	0.622254
TC0500002760.mm.2	Scarb2	0.00106199	0.0331682	24	12	0.254558
TC0500003531.mm.2	Papolb	0.00106199	0.0331682	24	2	0.342947
TC0600003599.mm.2	Gm11128	0.00106199	0.0331682	24	20	0.770746
TC0700002544.mm.2	Vmn1r166; Vmn1r131; Vmn1r111	0.00106199	0.0331682	24	0	0.330572
TC0700002552.mm.2	Vmn1r138; Vmn1r111	0.00106199	0.0331682	24	0	0.330572
TC0700002581.mm.2	Vmn1r131; Vmn1r138; Vmn1r166; Vmn1r111	0.00106199	0.0331682	24	0	0.330572
TC0800001247.mm.2	Prmt7	0.00106199	0.0331682	24	20	0.272236
TC0800001577.mm.2	Coa6	0.00106199	0.0331682	24	16	0.424264
TC0800002470.mm.2	Smim7	0.00106199	0.0331682	24	10	0.26163
TC0900001236.mm.2	Copb2	0.00106199	0.0331682	24	8	0.28461
TC0900001883.mm.2	Spc24	0.00106199	0.0331682	24	18	0.318198
TC0900002038.mm.2	Ei24	0.00106199	0.0331682	24	2	0.180312
TC1000002383.mm.2	Gstt1	0.00106199	0.0331682	24	18	0.434871
TC1100001369.mm.2	Mrps23	0.00106199	0.0331682	24	14	0.194454
TC1300000278.mm.2	BC005537	0.00106199	0.0331682	24	16	0.279307
TC1400000910.mm.2	Pinx1	0.00106199	0.0331682	24	20	0.579828
TC1500001051.mm.2	Dazap2	0.00106199	0.0331682	24	4	0.247487
TC1500001511.mm.2	Ext1	0.00106199	0.0331682	24	12	0.22981
TC1600001006.mm.2	Ifngr2	0.00106199	0.0331682	24	8	0.533866
TC1700000535.mm.2	Pde9a	0.00106199	0.0331682	24	22	0.928078
TC1700001132.mm.2	Lpin2	0.00106199	0.0331682	24	10	0.537401
TC1800000816.mm.2	Smad2	0.00106199	0.0331682	24	10	0.325269
TC0100003449.mm.2	Mpzl1	0.00118882	0.0354349	24	0	0.770746
TC0100003725.mm.2	Mia3	0.00118882	0.0354349	24	12	0.157331
TC0300001719.mm.2	Naaladl2	0.00118882	0.0354349	24	14	0.601041
TC0300002815.mm.2	Palmd	0.00118882	0.0354349	24	8	0.563918
TC0400001123.mm.2	Tmem59	0.00118882	0.0354349	24	18	0.318198
TC0500001302.mm.2	Fbxo21	0.00118882	0.0354349	24	8	1.02177
TC0500001337.mm.2	Sds	0.00118882	0.0354349	24	14	0.505581
TC0500002688.mm.2	Ugt2b34	0.00118882	0.0354349	24	18	0.268701
TC0500003261.mm.2	Eif2b1	0.00118882	0.0354349	24	16	0.302288
TC0600000180.mm.2	Ing3	0.00118882	0.0354349	24	16	0.434871
TC0600001448.mm.2	Nop2	0.00118882	0.0354349	24	16	0.753069
TC0600001810.mm.2	Pdk4	0.00118882	0.0354349	24	0	1.15082
TC0600002116.mm.2	Kdm7a	0.00118882	0.0354349	24	8	0.374767
TC0600003020.mm.2	Erc1	0.00118882	0.0354349	24	18	0.307591
TC0700002015.mm.2	Olfr46	0.00118882	0.0354349	24	20	0.304056
TC0800000072.mm.2	Gm10217	0.00118882	0.0354349	24	4	0.493207
TC0800002144.mm.2	Klkb1; Cyp4v3	0.00118882	0.0354349	24	8	0.30052
TC0900000659.mm.2	Idh3a	0.00118882	0.0354349	24	16	0.392444
TC0900001099.mm.2	Sh3bgrl2	0.00118882	0.0354349	24	10	0.431335
TC0X00000668.mm.2	Nsdhl	0.00118882	0.0354349	24	10	0.429567
TC1000000150.mm.2	Map7	0.00118882	0.0354349	24	0	0.240416
TC1000002487.mm.2	Tmem259	0.00118882	0.0354349	24	8	0.272236
TC1100000900.mm.2	Per1	0.00118882	0.0354349	24	12	1.21799
TC1100002863.mm.2	Cops3	0.00118882	0.0354349	24	6	0.190919
TC1100004147.mm.2	Tk1	0.00118882	0.0354349	24	18	0.367696
TC1200000502.mm.2	Mia2	0.00118882	0.0354349	24	12	0.325269
TC1200002272.mm.2	Serpina6	0.00118882	0.0354349	24	14	0.480833
TC1300002013.mm.2	Nfil3	0.00118882	0.0354349	24	22	1.08718
TC1400002490.mm.2	Naa16	0.00118882	0.0354349	24	16	0.39598
TC1600001395.mm.2	Masp1	0.00118882	0.0354349	24	8	0.205061
TC1700002317.mm.2	Mydgf	0.00118882	0.0354349	24	20	0.268701
TC1700002573.mm.2	Atl2	0.00118882	0.0354349	24	16	0.265165
TC1900001085.mm.2	Stxbp3-ps	0.00118882	0.0354349	24	6	0.321734
TC1900001390.mm.2	Sgms1	0.00118882	0.0354349	24	10	0.62579
TC0100001909.mm.2	Mrpl15	0.00134631	0.0382303	24	16	0.372999
TC0100002950.mm.2	Epb41l5	0.00134631	0.0382303	24	10	0.350018
TC0100003443.mm.2	Dcaf6	0.00134631	0.0382303	24	8	0.521491
TC0200002872.mm.2	Optn	0.00134631	0.0382303	24	12	0.291682
TC0300001409.mm.2	Adh1	0.00134631	0.0382303	24	18	0.120208
TC0300002103.mm.2	Ccnl1	0.00134631	0.0382303	24	4	0.226274
TC0300003077.mm.2	Sh3glb1	0.00134631	0.0382303	24	12	0.215668
TC0300003247.mm.2	Amy1	0.00134631	0.0382303	24	20	0.357089
TC0400004135.mm.2	Rer1	0.00134631	0.0382303	24	14	0.424264
TC0500001522.mm.2	Tpst1	0.00134631	0.0382303	24	18	0.328805
TC0500002284.mm.2	Slc2a9	0.00134631	0.0382303	24	12	0.512652
TC0600002484.mm.2	Usp39	0.00134631	0.0382303	24	16	0.360624
TC0700002539.mm.2	Vmn1r127	0.00134631	0.0382303	24	4	0.26163
TC0700004148.mm.2	Sox6	0.00134631	0.0382303	24	8	0.335876
TC0800001635.mm.2	Elavl1	0.00134631	0.0382303	24	4	0.282843
TC0800003164.mm.2	Taf5l	0.00134631	0.0382303	24	10	0.282843
TC0900002034.mm.2	A630095E13Rik	0.00134631	0.0382303	24	4	0.445477
TC0900002181.mm.2	Kmt2a	0.00134631	0.0382303	24	8	0.288146
TC0X00001634.mm.2	Phka2	0.00134631	0.0382303	24	6	0.438406
TC0X00002783.mm.2	Slc16a2	0.00134631	0.0382303	24	8	0.565685
TC1000001640.mm.2	Olfr784	0.00134631	0.0382303	24	2	0.311127
TC1100000674.mm.2	Larp1	0.00134631	0.0382303	24	2	0.259862
TC1100001133.mm.2	Myo18a	0.00134631	0.0382303	24	8	0.346482
TC1100001293.mm.2	Bcas3	0.00134631	0.0382303	24	10	0.314663
TC1100002028.mm.2	Hgs	0.00134631	0.0382303	24	0	0.233345
TC1100003269.mm.2	Taok1	0.00134631	0.0382303	24	8	0.19799
TC1200000688.mm.2	Fut8	0.00134631	0.0382303	24	16	0.417193
TC1200001369.mm.2	Ubxn2a	0.00134631	0.0382303	24	18	0.39598
TC1300001555.mm.2	Hist1h2bl	0.00134631	0.0382303	24	22	0.22981
TC1300001557.mm.2	Hist1h4k	0.00134631	0.0382303	24	22	0.275772
TC1400000851.mm.2	Spata13	0.00134631	0.0382303	24	6	0.500278
TC1400002343.mm.2	Bmp1	0.00134631	0.0382303	24	20	0.321734
TC1500000408.mm.2	Fam83a	0.00134631	0.0382303	24	4	0.452548
TC1600001042.mm.2	Cbr1	0.00134631	0.0382303	24	18	0.403051
TC1700002324.mm.2	Ptprs	0.00134631	0.0382303	24	6	0.353553
TC1800001149.mm.2	Fam13b	0.00134631	0.0382303	24	2	0.314663
TC1900000166.mm.2	B3gat3	0.00134631	0.0382303	24	0	0.296985
TC0100002305.mm.2	Nabp1	0.00150379	0.0408229	24	10	0.581595
TC0100003422.mm.2	Atp1b1	0.00150379	0.0408229	24	12	0.367696
TC0100003874.mm.2	Ankrd23	0.00150379	0.0408229	24	22	0.339411
TC0200003629.mm.2	Fap	0.00150379	0.0408229	24	4	0.304056
TC0200004543.mm.2	Trpm7	0.00150379	0.0408229	24	10	0.449013
TC0200005331.mm.2	Gm14399	0.00150379	0.0408229	24	16	0.401283
TC0300002828.mm.2	Ptbp2	0.00150379	0.0408229	24	6	0.468458
TC0400000662.mm.2	Snx30	0.00150379	0.0408229	24	8	0.53033
TC0400002007.mm.2	Dnajc11	0.00150379	0.0408229	24	14	0.325269
TC0500002461.mm.2	Rell1	0.00150379	0.0408229	24	6	0.583363
TC0500002712.mm.2	Jchain	0.00150379	0.0408229	24	18	0.494975
TC0500002940.mm.2	Tmed5	0.00150379	0.0408229	24	12	0.268701
TC0500003186.mm.2	Trafd1	0.00150379	0.0408229	24	6	0.346482
TC0500003632.mm.2	Slc46a3	0.00150379	0.0408229	24	16	0.857367
TC0600000565.mm.2	Gimap9	0.00150379	0.0408229	24	20	0.694732
TC0600001317.mm.2	Gm7292	0.00150379	0.0408229	24	4	0.296985
TC0600001375.mm.2	Gm10319	0.00150379	0.0408229	24	2	0.311127
TC0700000997.mm.2	Lins1	0.00150379	0.0408229	24	18	0.312895
TC0700002771.mm.2	Cox6b1	0.00150379	0.0408229	24	18	0.247487
TC0800002142.mm.2	F11	0.00150379	0.0408229	24	6	0.494975
TC0900003064.mm.2	Wdr6	0.00150379	0.0408229	24	8	0.441942
TC1000000312.mm.2	Hdac2	0.00150379	0.0408229	24	18	0.251023
TC1100000407.mm.2	Nudcd2	0.00150379	0.0408229	24	16	0.240416
TC1100000730.mm.2	Mprip	0.00150379	0.0408229	24	4	0.217435
TC1100003478.mm.2	Rad51c	0.00150379	0.0408229	24	20	0.989949
TC1100003787.mm.2	Stat5b	0.00150379	0.0408229	24	2	0.445477
TC1200001874.mm.2	L2hgdh	0.00150379	0.0408229	24	16	0.399515
TC1400001315.mm.2	Farp1	0.00150379	0.0408229	24	10	0.399515
TC1400001695.mm.2	Dph3	0.00150379	0.0408229	24	18	0.526795
TC1500000821.mm.2	Ppara	0.00150379	0.0408229	24	10	0.654074
TC1500001978.mm.2	Mcat	0.00150379	0.0408229	24	22	0.173241
TC1700000091.mm.2	T; t	0.00150379	0.0408229	24	20	0.274004
TC1700000323.mm.2	Srrm2	0.00150379	0.0408229	24	6	0.321734
TC1700002562.mm.2	Prkd3	0.00150379	0.0408229	24	6	0.583363
TC1900000409.mm.2	Smarca2	0.00150379	0.0408229	24	14	0.608112
TC1900001163.mm.2	Dtx4	0.00150379	0.0408229	24	2	0.507349
TC0100002025.mm.2	Gm2710; Gm10075	0.0016984	0.0444747	24	14	0.127279
TC0200002056.mm.2	Plcb1	0.0016984	0.0444747	24	12	0.251023
TC0200003654.mm.2	Grb14	0.0016984	0.0444747	24	6	0.434871
TC0200004481.mm.2	Zscan29	0.0016984	0.0444747	24	16	0.30052
TC0300000412.mm.2	Alg5	0.0016984	0.0444747	24	16	0.144957
TC0400001930.mm.2	Mtor	0.0016984	0.0444747	24	8	0.59397
TC0500001719.mm.2	Slc29a4	0.0016984	0.0444747	24	22	0.346482
TC0500002059.mm.2	Pus7	0.0016984	0.0444747	24	18	0.583363
TC0500003198.mm.2	Sh2b3	0.0016984	0.0444747	24	14	0.263397
TC1000000884.mm.2	Eef2	0.0016984	0.0444747	24	10	0.123744
TC1000002658.mm.2	Slc17a8	0.0016984	0.0444747	24	20	0.565685
TC1100000625.mm.2	Fnip1	0.0016984	0.0444747	24	8	0.639932
TC1100001578.mm.2	Psmd3	0.0016984	0.0444747	24	8	0.311127
TC1100003296.mm.2	Slc13a2	0.0016984	0.0444747	24	22	0.717713
TC1100003314.mm.2	Lgals9	0.0016984	0.0444747	24	6	0.456084
TC1100003588.mm.2	Kat7	0.0016984	0.0444747	24	12	0.39598
TC1100003917.mm.2	Ftsj3	0.0016984	0.0444747	24	16	0.480833
TC1200000600.mm.2	Actr10	0.0016984	0.0444747	24	12	0.173241
TC1200001253.mm.2	Aspg	0.0016984	0.0444747	24	8	0.376534
TC1200002416.mm.2	Ppp1r13b	0.0016984	0.0444747	24	6	0.397748
TC1300002538.mm.2	Marveld2	0.0016984	0.0444747	24	4	0.424264
TC1400000877.mm.2	Rnaseh2b	0.0016984	0.0444747	24	16	0.516188
TC1400001537.mm.2	Anxa7	0.0016984	0.0444747	24	12	0.33234
TC1500000388.mm.2	Mal2	0.0016984	0.0444747	24	20	0.60988
TC1500000644.mm.2	Mpst	0.0016984	0.0444747	24	20	0.456084
TC1500001090.mm.2	Soat2	0.0016984	0.0444747	24	6	0.624022
TC1600000150.mm.2	Mkl2	0.0016984	0.0444747	24	0	0.403051
TC1600000564.mm.2	Igsf11	0.0016984	0.0444747	24	4	0.399515
TC1600000726.mm.2	Cblb	0.0016984	0.0444747	24	6	0.489671
TC1900000162.mm.2	Ubxn1	0.0016984	0.0444747	24	4	0.339411
TC0100000135.mm.2	Gsta3	0.001893	0.0473912	24	20	0.19799
TC0100002764.mm.2	Ngef	0.001893	0.0473912	24	12	0.279307
TC0100003522.mm.2	Fcgr2b	0.001893	0.0473912	24	18	0.36416
TC0100003838.mm.2	G0s2	0.001893	0.0473912	24	18	2.07713
TC0200000407.mm.2	Tmem210	0.001893	0.0473912	24	10	0.275772
TC0200002018.mm.2	Smox	0.001893	0.0473912	24	2	0.330572
TC0200005140.mm.2	Ncoa5	0.001893	0.0473912	24	20	0.586899
TC0300000416.mm.2	Spg20	0.001893	0.0473912	24	2	0.342947
TC0400000659.mm.2	Hsdl2	0.001893	0.0473912	24	22	0.311127
TC0400001164.mm.2	Eps15	0.001893	0.0473912	24	10	0.307591
TC0400002568.mm.2	Zbtb5	0.001893	0.0473912	24	18	0.286378
TC0500000532.mm.2	Pi4k2b	0.001893	0.0473912	24	16	0.480833
TC0500000647.mm.2	Tmem33	0.001893	0.0473912	24	18	0.275772
TC0600001203.mm.2	Bhlhe40	0.001893	0.0473912	24	14	0.781353
TC0600002543.mm.2	Mrpl19	0.001893	0.0473912	24	18	0.279307
TC0700002623.mm.2	Pou2f2; Mir6537	0.001893	0.0473912	24	6	0.222739
TC0700002944.mm.2	Zfp715	0.001893	0.0473912	24	12	0.222739
TC0700004580.mm.2	Kcnq1ot1	0.001893	0.0473912	24	16	0.454316
TC0800001230.mm.2	Thap11	0.001893	0.0473912	24	16	0.434871
TC0800003237.mm.2	Galnt2	0.001893	0.0473912	24	20	0.30052
TC0900001459.mm.2	Scap	0.001893	0.0473912	24	6	0.33234
TC1100001321.mm.2	Ptrh2	0.001893	0.0473912	24	18	0.205061
TC1100001706.mm.2	Hexim1	0.001893	0.0473912	24	20	0.470226
TC1100002046.mm.2	Hmga1-rs1	0.001893	0.0473912	24	10	0.445477
TC1100002611.mm.2	Timd2	0.001893	0.0473912	24	20	0.141421
TC1100002854.mm.2	Zkscan17	0.001893	0.0473912	24	8	0.502046
TC1100004233.mm.2	Fasn	0.001893	0.0473912	24	14	1.22329
TC1200000874.mm.2	Samd15	0.001893	0.0473912	24	0	0.413657
TC1200002120.mm.2	Vipas39	0.001893	0.0473912	24	14	0.268701
TC1300000958.mm.2	Arrdc3	0.001893	0.0473912	24	8	1.0253
TC1300001020.mm.2	Ssbp2	0.001893	0.0473912	24	16	0.533866
TC1300001812.mm.2	Nrn1	0.001893	0.0473912	24	6	0.487904
TC1500000659.mm.2	Nol12	0.001893	0.0473912	24	18	0.53033
TC1500000667.mm.2	Polr2f	0.001893	0.0473912	24	14	0.222739
TC1500001192.mm.2	Skp2	0.001893	0.0473912	24	18	0.415425
TC1600002118.mm.2	Pigp	0.001893	0.0473912	24	12	0.318198
TC1700001642.mm.2	Ndufb10	0.001893	0.0473912	24	18	0.385373
TC1700001888.mm.2	Rps18	0.001893	0.0473912	24	20	0.183848
TC1800000200.mm.2	Mocos	0.001893	0.0473912	24	2	0.258094
TC0100000171.mm.2	Lmbrd1	0.00213236	0.0512458	24	10	0.176777
TC0100002772.mm.2	A730008H23Rik; Hjurp; 6430706D22Rik	0.00213236	0.0512458	24	10	0.512652
TC0200002279.mm.2	Tbc1d20	0.00213236	0.0512458	24	8	0.463155
TC0200003758.mm.2	Chrna1	0.00213236	0.0512458	24	4	0.240416
TC0300001448.mm.2	Ccbl2	0.00213236	0.0512458	24	20	0.353553
TC0300001956.mm.2	Ndufc1	0.00213236	0.0512458	24	22	0.247487
TC0300002277.mm.2	Cd1d1	0.00213236	0.0512458	24	20	0.222739
TC0300002343.mm.2	Slc50a1	0.00213236	0.0512458	24	18	0.367696
TC0300002348.mm.2	Adam15	0.00213236	0.0512458	24	4	0.258094
TC0400001641.mm.2	Paqr7	0.00213236	0.0512458	24	18	0.463155
TC0400001694.mm.2	4930549C01Rik	0.00213236	0.0512458	24	2	0.346482
TC0400002251.mm.2	Ripk2	0.00213236	0.0512458	24	8	0.652306
TC0600000359.mm.2	Akr1d1	0.00213236	0.0512458	24	18	0.650538
TC0600003457.mm.2	Ergic2	0.00213236	0.0512458	24	12	0.371231
TC0800000542.mm.2	Irf2	0.00213236	0.0512458	24	8	0.350018
TC0900000204.mm.2	Ldlr	0.00213236	0.0512458	24	16	0.413657
TC0900000876.mm.2	Rps27l	0.00213236	0.0512458	24	22	0.298753
TC0X00000649.mm.2	Mtm1	0.00213236	0.0512458	24	4	0.282843
TC0X00000973.mm.2	Gjb1	0.00213236	0.0512458	24	4	0.275772
TC0X00001120.mm.2	Tex16	0.00213236	0.0512458	24	2	0.388909
TC0X00002825.mm.2	Magt1	0.00213236	0.0512458	24	20	0.392444
TC1000000656.mm.2	Rhobtb1	0.00213236	0.0512458	24	20	0.470226
TC1000001621.mm.2	Mmp19	0.00213236	0.0512458	24	20	0.4278
TC1000003228.mm.2	Bloc1s1	0.00213236	0.0512458	24	18	0.205061
TC1100000200.mm.2	Sertad2	0.00213236	0.0512458	24	6	0.346482
TC1100001886.mm.2	Slc9a3r1	0.00213236	0.0512458	24	14	0.314663
TC1100003667.mm.2	Fbxl20	0.00213236	0.0512458	24	6	0.632861
TC1200001601.mm.2	Hbp1	0.00213236	0.0512458	24	6	0.353553
TC1400001177.mm.2	Lmo7	0.00213236	0.0512458	24	12	0.318198
TC1400002336.mm.2	Slc39a14	0.00213236	0.0512458	24	10	0.505581
TC1500000736.mm.2	Xrcc6	0.00213236	0.0512458	24	18	0.357089
TC1500001920.mm.2	St13	0.00213236	0.0512458	24	18	0.339411
TC1500001955.mm.2	Cyp2d40	0.00213236	0.0512458	24	18	0.233345
TC1600000234.mm.2	Dgcr6	0.00213236	0.0512458	24	18	0.387141
TC1600000249.mm.2	Cldn5	0.00213236	0.0512458	24	20	0.533866
TC1600001193.mm.2	Tekt5	0.00213236	0.0512458	24	16	0.240416
TC1600001593.mm.2	Ndufb4	0.00213236	0.0512458	24	20	0.265165
TC0100003836.mm.2	Hsd11b1	0.00237171	0.0537959	24	20	0.240416
TC0100003893.mm.2	Ahctf1	0.00237171	0.0537959	24	20	0.46669
TC0200003376.mm.2	Ndufa8	0.00237171	0.0537959	24	18	0.194454
TC0200004965.mm.2	Gss	0.00237171	0.0537959	24	8	0.258094
TC0200005081.mm.2	Gm20267	0.00237171	0.0537959	24	16	0.26163
TC0200005476.mm.2	Nup35	0.00237171	0.0537959	24	18	0.572756
TC0400001452.mm.2	Lsm10	0.00237171	0.0537959	24	20	0.374767
TC0400002481.mm.2	Ccl19	0.00237171	0.0537959	24	4	0.346482
TC0400003200.mm.2	Pcsk9	0.00237171	0.0537959	24	14	0.523259
TC0500000072.mm.2	Speer1	0.00237171	0.0537959	24	2	0.388909
TC0500000077.mm.2	Gm8926	0.00237171	0.0537959	24	2	0.388909
TC0500000689.mm.2	Dcun1d4	0.00237171	0.0537959	24	10	0.424264
TC0500003490.mm.2	3110082I17Rik	0.00237171	0.0537959	24	6	0.367696
TC0600001259.mm.2	Tatdn2	0.00237171	0.0537959	24	16	0.38007
TC0600002422.mm.2	Gadd45a	0.00237171	0.0537959	24	12	0.424264
TC0600002491.mm.2	Mat2a	0.00237171	0.0537959	24	16	0.39598
TC0600002494.mm.2	Elmod3	0.00237171	0.0537959	24	20	0.371231
TC0600002641.mm.2	Mxd1	0.00237171	0.0537959	24	6	0.449013
TC0700002635.mm.2	Ceacam1	0.00237171	0.0537959	24	4	0.233345
TC0700002820.mm.2	Scgb2b26	0.00237171	0.0537959	24	2	0.445477
TC0700002977.mm.2	Med25	0.00237171	0.0537959	24	6	0.353553
TC0800000538.mm.2	Acsl1	0.00237171	0.0537959	24	20	0.212132
TC0800002056.mm.2	Cldn23	0.00237171	0.0537959	24	0	0.33234
TC0800002683.mm.2	Rpgrip1l	0.00237171	0.0537959	24	18	0.403051
TC0900000330.mm.2	Srpr	0.00237171	0.0537959	24	12	0.243952
TC0900001016.mm.2	Leo1	0.00237171	0.0537959	24	22	0.334108
TC0900001290.mm.2	Anapc13	0.00237171	0.0537959	24	22	0.212132
TC0900001419.mm.2	Prkar2a	0.00237171	0.0537959	24	20	0.415425
TC0900001927.mm.2	Herpud2	0.00237171	0.0537959	24	4	0.169706
TC0900002676.mm.2	Mapk6	0.00237171	0.0537959	24	10	0.431335
TC0900003234.mm.2	Acaa1b	0.00237171	0.0537959	24	20	0.484368
TC1000000126.mm.2	Reps1	0.00237171	0.0537959	24	6	0.661145
TC1000002043.mm.2	Amd2; Amd1	0.00237171	0.0537959	24	16	0.809637
TC1000002541.mm.2	Nfic	0.00237171	0.0537959	24	18	0.449013
TC1000002998.mm.2	Dyrk2	0.00237171	0.0537959	24	4	0.36416
TC1100002062.mm.2	Narf	0.00237171	0.0537959	24	10	0.417193
TC1100002364.mm.2	Ahsa2	0.00237171	0.0537959	24	18	0.505581
TC1200001982.mm.2	Zfyve26	0.00237171	0.0537959	24	8	0.441942
TC1300001173.mm.2	Adamts6	0.00237171	0.0537959	24	8	0.684126
TC1300001683.mm.2	Hdgfl1	0.00237171	0.0537959	24	22	0.183848
TC1400000165.mm.2	Fam149b	0.00237171	0.0537959	24	18	0.321734
TC1400000248.mm.2	Anxa11	0.00237171	0.0537959	24	14	0.365928
TC1400000421.mm.2	1700024B05Rik	0.00237171	0.0537959	24	2	0.500278
TC1400000464.mm.2	Gm8229; Gm3370	0.00237171	0.0537959	24	2	0.399515
TC1400000469.mm.2	Gm8247	0.00237171	0.0537959	24	4	0.417193
TC1400001216.mm.2	Gm4663	0.00237171	0.0537959	24	2	0.19799
TC1400001418.mm.2	Gm6356	0.00237171	0.0537959	24	0	0.19799
TC1400002341.mm.2	Polr3d	0.00237171	0.0537959	24	16	0.36416
TC1600000218.mm.2	Aifm3	0.00237171	0.0537959	24	12	0.346482
TC1600000538.mm.2	Lrrc58	0.00237171	0.0537959	24	20	0.413657
TC1600001378.mm.2	Tra2b	0.00237171	0.0537959	24	22	0.374767
TC1700000026.mm.2	Arid1b	0.00237171	0.0537959	24	2	0.311127
TC1700001150.mm.2	Lclat1	0.00237171	0.0537959	24	10	0.305824
TC1700001465.mm.2	Unc93a; Gm9992	0.00237171	0.0537959	24	6	0.579828
TC4_JH584293_random00000008.mm.2	Ccl19	0.00237171	0.0537959	24	4	0.30052
TC0100000133.mm.2	Tmem14a	0.00266475	0.0576177	24	16	0.406586
TC0100001245.mm.2	Arl8a	0.00266475	0.0576177	24	6	0.463155
TC0100001647.mm.2	Olfr417	0.00266475	0.0576177	24	2	0.305824
TC0100002214.mm.2	Rev1	0.00266475	0.0576177	24	12	0.390676
TC0100002645.mm.2	Serpine2	0.00266475	0.0576177	24	20	0.372999
TC0100003603.mm.2	Grem2	0.00266475	0.0576177	24	10	0.837922
TC0200000509.mm.2	Gm13547	0.00266475	0.0576177	24	8	0.480833
TC0200000551.mm.2	Ass1; Gm5424	0.00266475	0.0576177	24	0	0.226274
TC0200000909.mm.2	44262	0.00266475	0.0576177	24	8	0.645235
TC0200003298.mm.2	Uck1	0.00266475	0.0576177	24	18	0.602809
TC0200004667.mm.2	Slc23a2	0.00266475	0.0576177	24	8	0.715946
TC0300000453.mm.2	Tsc22d2	0.00266475	0.0576177	24	10	0.367696
TC0300000457.mm.2	Eif2a	0.00266475	0.0576177	24	12	0.251023
TC0300000829.mm.2	Sprr2i	0.00266475	0.0576177	24	4	0.222739
TC0300001576.mm.2	Zranb2	0.00266475	0.0576177	24	20	0.219203
TC0400002022.mm.2	Rpl22	0.00266475	0.0576177	24	22	0.162635
TC0400002159.mm.2	Tox	0.00266475	0.0576177	24	10	0.440174
TC0400002755.mm.2	Susd1	0.00266475	0.0576177	24	12	0.374767
TC0500000547.mm.2	Stim2	0.00266475	0.0576177	24	14	0.350018
TC0500001576.mm.2	Tbl2	0.00266475	0.0576177	24	16	0.537401
TC0600000849.mm.2	Tmem150a	0.00266475	0.0576177	24	20	0.388909
TC0600002582.mm.2	Tex261	0.00266475	0.0576177	24	16	0.249255
TC0600003205.mm.2	Fkbp4	0.00266475	0.0576177	24	20	0.859135
TC0700000565.mm.2	Arhgap33os	0.00266475	0.0576177	24	4	0.311127
TC0700001644.mm.2	Mical2	0.00266475	0.0576177	24	0	0.523259
TC0800001917.mm.2	Ddhd2	0.00266475	0.0576177	24	12	0.542704
TC0800003175.mm.2	Fam89a	0.00266475	0.0576177	24	22	0.36416
TC0X00001533.mm.2	Hsd17b10	0.00266475	0.0576177	24	20	0.247487
TC0X00003057.mm.2	Serpina7	0.00266475	0.0576177	24	6	0.715946
TC1000000830.mm.2	Wdr18	0.00266475	0.0576177	24	16	0.289914
TC1000001145.mm.2	Fgd6	0.00266475	0.0576177	24	6	0.413657
TC1100001051.mm.2	Tsr1	0.00266475	0.0576177	24	14	0.468458
TC1100003152.mm.2	Cyb5d2	0.00266475	0.0576177	24	18	0.233345
TC1100003409.mm.2	Gm11437	0.00266475	0.0576177	24	22	0.586899
TC1100004212.mm.2	Fam195b	0.00266475	0.0576177	24	8	0.335876
TC1100004296.mm.2	Nme1	0.00266475	0.0576177	24	20	0.452548
TC1200002017.mm.2	Gm4787	0.00266475	0.0576177	24	16	0.512652
TC1300000460.mm.2	Gcnt2	0.00266475	0.0576177	24	8	0.657609
TC1300000543.mm.2	Rnf144b	0.00266475	0.0576177	24	22	0.452548
TC1300001017.mm.2	Rps23	0.00266475	0.0576177	24	16	0.0848528
TC1500002183.mm.2	Rnd1	0.00266475	0.0576177	24	0	0.6965
TC1500002346.mm.2	Plec	0.00266475	0.0576177	24	12	0.279307
TC1600002181.mm.2	Dgcr2	0.00266475	0.0576177	24	10	0.10253
TC1700001178.mm.2	Crim1	0.00266475	0.0576177	24	10	0.243952
TC1700001986.mm.2	Atat1	0.00266475	0.0576177	24	2	0.376534
TC1700002216.mm.2	Foxp4	0.00266475	0.0576177	24	10	0.201525
TC1900000709.mm.2	As3mt	0.00266475	0.0576177	24	18	0.346482
TC1900000766.mm.2	Shoc2	0.00266475	0.0576177	24	6	0.311127
TC0100000315.mm.2	Mrps9	0.00295778	0.0611551	24	10	0.212132
TC0100001522.mm.2	Adcy10	0.00295778	0.0611551	24	4	0.46669
TC0100003253.mm.2	Swt1	0.00295778	0.0611551	24	16	0.532098
TC0200002751.mm.2	Gm14322	0.00295778	0.0611551	24	18	0.517956
TC0200003436.mm.2	Scai	0.00295778	0.0611551	24	10	0.367696
TC0200004676.mm.2	Gpcpd1	0.00295778	0.0611551	24	10	0.997021
TC0200005339.mm.2	Gm14434; 0610010B08Rik; Gm4724	0.00295778	0.0611551	24	18	0.509117
TC0200005518.mm.2	Zfp512b	0.00295778	0.0611551	24	8	0.570989
TC0300000949.mm.2	Txnip	0.00295778	0.0611551	24	12	0.461387
TC0400001783.mm.2	Arhgef19	0.00295778	0.0611551	24	20	0.304056
TC0400002854.mm.2	Tle1	0.00295778	0.0611551	24	6	0.551543
TC0400003253.mm.2	Zfyve9	0.00295778	0.0611551	24	14	0.401283
TC0400003475.mm.2	Mfsd2a	0.00295778	0.0611551	24	16	1.78544
TC0500001180.mm.2	Tfip11	0.00295778	0.0611551	24	22	0.242184
TC0500001370.mm.2	Atxn2	0.00295778	0.0611551	24	4	0.445477
TC0500003615.mm.2	Usp12	0.00295778	0.0611551	24	16	0.233345
TC0600000676.mm.2	Avl9	0.00295778	0.0611551	24	4	0.374767
TC0600001450.mm.2	Mrpl51	0.00295778	0.0611551	24	14	0.212132
TC0600001917.mm.2	Tspan12	0.00295778	0.0611551	24	10	0.212132
TC0700000806.mm.2	Josd2; Mir7052	0.00295778	0.0611551	24	22	0.406586
TC0700001816.mm.2	Ypel3	0.00295778	0.0611551	24	4	0.298753
TC0700002693.mm.2	Timm50	0.00295778	0.0611551	24	18	0.183848
TC0700003448.mm.2	Lrrc28	0.00295778	0.0611551	24	16	0.703571
TC0800000353.mm.2	Eif4ebp1	0.00295778	0.0611551	24	14	0.325269
TC0800001682.mm.2	Lig4	0.00295778	0.0611551	24	16	0.537401
TC0900000793.mm.2	Cln6	0.00295778	0.0611551	24	8	0.814941
TC0X00001964.mm.2	Gm5934	0.00295778	0.0611551	24	2	0.369463
TC1000000030.mm.2	Esr1	0.00295778	0.0611551	24	16	0.512652
TC1000000537.mm.2	Micu1	0.00295778	0.0611551	24	2	0.236881
TC1000000752.mm.2	Slc19a1	0.00295778	0.0611551	24	12	0.516188
TC1000001480.mm.2	Llph	0.00295778	0.0611551	24	16	0.431335
TC1000002660.mm.2	Actr6	0.00295778	0.0611551	24	16	0.479065
TC1100000975.mm.2	Mis12	0.00295778	0.0611551	24	14	0.622254
TC1100002579.mm.2	Ublcp1	0.00295778	0.0611551	24	16	0.289914
TC1100002862.mm.2	Flcn	0.00295778	0.0611551	24	8	1.48492
TC1200000671.mm.2	Syne2; Mir5101	0.00295778	0.0611551	24	12	0.353553
TC1200001813.mm.2	Sec23a	0.00295778	0.0611551	24	12	0.155563
TC1300000674.mm.2	Txndc15	0.00295778	0.0611551	24	22	0.247487
TC1400002132.mm.2	Zmym5	0.00295778	0.0611551	24	8	0.346482
TC1500001302.mm.2	Trio	0.00295778	0.0611551	24	4	0.30052
TC1500001403.mm.2	Ubr5	0.00295778	0.0611551	24	12	0.242184
TC1500001919.mm.2	Slc25a17	0.00295778	0.0611551	24	20	0.282843
TC1700000349.mm.2	Rps2; Snora64	0.00295778	0.0611551	24	20	0.152028
TC1800000103.mm.2	Lama3	0.00295778	0.0611551	24	14	0.816708
TC1800001478.mm.2	Lman1	0.00295778	0.0611551	24	16	0.311127
TC1900000465.mm.2	Minpp1	0.00295778	0.0611551	24	10	0.33234
TC1900000637.mm.2	Gm10768; Abcc2	0.00295778	0.0611551	24	10	0.473762
TC0100000253.mm.2	Cox5b	0.00331494	0.0658421	24	22	0.215668
TC0100001855.mm.2	Lpgat1	0.00331494	0.0658421	24	16	0.353553
TC0100002411.mm.2	Wdr12	0.00331494	0.0658421	24	16	0.388909
TC0100003313.mm.2	Tor1aip1	0.00331494	0.0658421	24	8	0.219203
TC0100003323.mm.2	Ralgps2	0.00331494	0.0658421	24	8	0.385373
TC0200000585.mm.2	Fam102a	0.00331494	0.0658421	24	14	0.661145
TC0200001366.mm.2	Psmc3	0.00331494	0.0658421	24	6	0.162635
TC0200002990.mm.2	Hacd1	0.00331494	0.0658421	24	18	0.275772
TC0200004896.mm.2	Trib3	0.00331494	0.0658421	24	8	0.767211
TC0200005023.mm.2	Blcap	0.00331494	0.0658421	24	0	0.318198
TC0200005328.mm.2	Gm14393	0.00331494	0.0658421	24	16	0.376534
TC0300000227.mm.2	Ndufb5	0.00331494	0.0658421	24	18	0.314663
TC0300002840.mm.2	Slc44a3	0.00331494	0.0658421	24	10	0.339411
TC0400001732.mm.2	Pla2g2c	0.00331494	0.0658421	24	22	0.334108
TC0400001974.mm.2	Eno1; Eno1b	0.00331494	0.0658421	24	18	0.208597
TC0400002271.mm.2	Wwp1	0.00331494	0.0658421	24	14	0.282843
TC0400003383.mm.2	St3gal3	0.00331494	0.0658421	24	6	0.410122
TC0500001975.mm.2	Gm17019	0.00331494	0.0658421	24	4	0.385373
TC0500002676.mm.2	Uba6	0.00331494	0.0658421	24	20	0.360624
TC0600001736.mm.2	Stk38l	0.00331494	0.0658421	24	16	0.449013
TC0700001580.mm.2	Olfml1	0.00331494	0.0658421	24	12	0.445477
TC0700003547.mm.2	Mrpl46	0.00331494	0.0658421	24	14	0.399515
TC0700003569.mm.2	Mesp1	0.00331494	0.0658421	24	16	0.201525
TC0800001003.mm.2	Lonp2	0.00331494	0.0658421	24	4	0.224506
TC0800001106.mm.2	Herpud1	0.00331494	0.0658421	24	12	0.464923
TC0800001213.mm.2	Elmo3	0.00331494	0.0658421	24	8	0.410122
TC0800002844.mm.2	Slc12a4	0.00331494	0.0658421	24	12	0.388909
TC0X00000068.mm.2	Tfe3	0.00331494	0.0658421	24	6	0.473762
TC0X00001786.mm.2	Eras	0.00331494	0.0658421	24	14	0.286378
TC0X00002433.mm.2	Bcap31	0.00331494	0.0658421	24	18	0.137886
TC0Y00000212.mm.2	Sly	0.00331494	0.0658421	24	4	0.487904
TC1000001555.mm.2	Dctn2	0.00331494	0.0658421	24	10	0.199758
TC1100002134.mm.2	Znrf3	0.00331494	0.0658421	24	8	0.500278
TC1100003593.mm.2	Ngfr	0.00331494	0.0658421	24	2	0.265165
TC1200000789.mm.2	Gm29361; Rbm25	0.00331494	0.0658421	24	14	0.304056
TC1200001979.mm.2	Vti1b	0.00331494	0.0658421	24	16	0.176777
TC1300000829.mm.2	Zfp493	0.00331494	0.0658421	24	18	0.445477
TC1400000324.mm.2	Tnnc1	0.00331494	0.0658421	24	18	0.615183
TC1400001436.mm.2	Pdhb	0.00331494	0.0658421	24	12	0.339411
TC1400001898.mm.2	Ero1l	0.00331494	0.0658421	24	16	0.523259
TC1600000168.mm.2	Mpv17l	0.00331494	0.0658421	24	16	0.558614
TC1700000353.mm.2	Meiob	0.00331494	0.0658421	24	6	0.662913
TC1700000483.mm.2	Lhfpl5	0.00331494	0.0658421	24	4	0.224506
TC1700001301.mm.2	Tmem247	0.00331494	0.0658421	24	0	0.272236
TC0100002600.mm.2	Cnppd1	0.00367209	0.0696349	24	8	0.685894
TC0200002367.mm.2	Acss2	0.00367209	0.0696349	24	22	0.403051
TC0200002731.mm.2	Gm2026	0.00367209	0.0696349	24	16	0.215668
TC0200005344.mm.2	Gm8898; Gm14431	0.00367209	0.0696349	24	16	0.360624
TC0300000323.mm.2	D3Ertd751e	0.00367209	0.0696349	24	20	0.254558
TC0400000108.mm.2	Rbm12b1	0.00367209	0.0696349	24	22	0.334108
TC0400000442.mm.2	Rgp1	0.00367209	0.0696349	24	10	0.321734
TC0400000529.mm.2	Nr4a3	0.00367209	0.0696349	24	16	0.247487
TC0400000531.mm.2	Invs	0.00367209	0.0696349	24	18	0.268701
TC0400002638.mm.2	Aldob	0.00367209	0.0696349	24	16	0.0919239
TC0400004191.mm.2	Slc6a9	0.00367209	0.0696349	24	12	0.39598
TC0500001512.mm.2	Cct6a; Snora15	0.00367209	0.0696349	24	16	0.240416
TC0500001717.mm.2	Wipi2	0.00367209	0.0696349	24	6	0.265165
TC0600000205.mm.2	Spam1	0.00367209	0.0696349	24	16	0.291682
TC0600000718.mm.2	Tigd2	0.00367209	0.0696349	24	6	0.489671
TC0600000848.mm.2	0610030E20Rik	0.00367209	0.0696349	24	2	0.341179
TC0600001589.mm.2	Borcs5	0.00367209	0.0696349	24	20	0.477297
TC0700003790.mm.2	Uvrag	0.00367209	0.0696349	24	12	0.289914
TC0700003822.mm.2	Mrpl48	0.00367209	0.0696349	24	12	0.120208
TC0700004628.mm.2	Prr14	0.00367209	0.0696349	24	4	0.219203
TC0800000017.mm.2	Stxbp2	0.00367209	0.0696349	24	10	0.208597
TC0800000482.mm.2	Slc7a2	0.00367209	0.0696349	24	8	0.786656
TC0800002300.mm.2	Palld	0.00367209	0.0696349	24	20	1.06596
TC0800002405.mm.2	Mast3	0.00367209	0.0696349	24	10	0.296985
TC0800002818.mm.2	Lrrc29	0.00367209	0.0696349	24	8	0.381838
TC0900000725.mm.2	Stra6	0.00367209	0.0696349	24	4	0.31643
TC0900002218.mm.2	Apoc3	0.00367209	0.0696349	24	0	0.137886
TC0X00002671.mm.2	Las1l	0.00367209	0.0696349	24	18	0.381838
TC0X00003391.mm.2	Rhox2c	0.00367209	0.0696349	24	4	0.26163
TC1000000484.mm.2	Asf1a	0.00367209	0.0696349	24	14	0.272236
TC1000000536.mm.2	Gm10322	0.00367209	0.0696349	24	2	0.494975
TC1000001183.mm.2	Btg1	0.00367209	0.0696349	24	0	0.657609
TC1000002003.mm.2	Amd2	0.00367209	0.0696349	24	12	0.629325
TC1000002042.mm.2	Gtf3c6	0.00367209	0.0696349	24	22	0.169706
TC1100002909.mm.2	Slc47a1	0.00367209	0.0696349	24	20	0.357089
TC1100004227.mm.2	Stra13	0.00367209	0.0696349	24	20	0.222739
TC1100004299.mm.2	Mif4gd	0.00367209	0.0696349	24	22	0.631093
TC1200000800.mm.2	Acot3	0.00367209	0.0696349	24	16	1.51851
TC1200001939.mm.2	Sgpp1	0.00367209	0.0696349	24	0	0.19799
TC1300001348.mm.2	4833420G17Rik	0.00367209	0.0696349	24	8	0.374767
TC1300002062.mm.2	Dok3	0.00367209	0.0696349	24	4	0.434871
TC1400000366.mm.2	Gm5460	0.00367209	0.0696349	24	22	0.325269
TC1400002023.mm.2	Hnrnpc	0.00367209	0.0696349	24	20	0.357089
TC1600001747.mm.2	Trmt10c	0.00367209	0.0696349	24	20	0.360624
TC1700001400.mm.2	Gm9992	0.00367209	0.0696349	24	6	0.816708
TC1700001458.mm.2	Acat3	0.00367209	0.0696349	24	0	0.272236
TC1700002207.mm.2	Taf8	0.00367209	0.0696349	24	6	0.388909
TC1800000084.mm.2	Mib1	0.00367209	0.0696349	24	10	0.0989949
TC1800000098.mm.2	Riok3	0.00367209	0.0696349	24	14	0.226274
TC1800001153.mm.2	Brd8	0.00367209	0.0696349	24	4	0.339411
TC1900001109.mm.2	Tkfc	0.00367209	0.0696349	24	14	0.445477
TC1900001588.mm.2	Mgea5	0.00367209	0.0696349	24	6	0.408354
TSUnmapped00000042.mm.2	E2f3	0.00367209	0.0696349	24	10	0.388909
TC0100000055.mm.2	Prex2	0.00410548	0.0754688	24	14	0.459619
TC0100001085.mm.2	3110009E18Rik	0.00410548	0.0754688	24	20	0.376534
TC0100002353.mm.2	Sf3b1	0.00410548	0.0754688	24	10	0.266933
TC0100003186.mm.2	Cfhr1	0.00410548	0.0754688	24	18	0.388909
TC0200002755.mm.2	Etohi1	0.00410548	0.0754688	24	16	0.418961
TC0200004076.mm.2	Olfr1264	0.00410548	0.0754688	24	0	0.342947
TC0300002257.mm.2	Fam160a1	0.00410548	0.0754688	24	4	0.494975
TC0300002836.mm.2	Rwdd3	0.00410548	0.0754688	24	10	0.438406
TC0400000395.mm.2	Ccl19	0.00410548	0.0754688	24	4	0.311127
TC0400001446.mm.2	Mir692-3; Ftl1; Ftl2-ps	0.00410548	0.0754688	24	16	0.144957
TC0400001788.mm.2	Fam131c	0.00410548	0.0754688	24	20	0.291682
TC0500001842.mm.2	Uspl1	0.00410548	0.0754688	24	18	0.551543
TC0500002827.mm.2	Hnrnpd	0.00410548	0.0754688	24	12	0.49851
TC0500003097.mm.2	Cox6a1	0.00410548	0.0754688	24	0	0.183848
TC0500003728.mm.2	D5Ertd579e	0.00410548	0.0754688	24	14	0.519723
TC0600000362.mm.2	Trim24	0.00410548	0.0754688	24	12	0.426032
TC0600001296.mm.2	44263	0.00410548	0.0754688	24	10	0.266933
TC0600003475.mm.2	Dennd5b	0.00410548	0.0754688	24	10	0.335876
TC0700000732.mm.2	2610021A01Rik	0.00410548	0.0754688	24	16	0.371231
TC0700003406.mm.2	Klf13	0.00410548	0.0754688	24	12	0.36416
TC0700003909.mm.2	Hbb-bs; Hbb-b1	0.00410548	0.0754688	24	20	1.05359
TC0800003096.mm.2	Vps9d1	0.00410548	0.0754688	24	6	0.417193
TC0900001445.mm.2	Map4	0.00410548	0.0754688	24	8	0.325269
TC0900003066.mm.2	Arih2	0.00410548	0.0754688	24	10	0.339411
TC1100000939.mm.2	Asgr1	0.00410548	0.0754688	24	16	0.173241
TC1100000954.mm.2	Gltpd2	0.00410548	0.0754688	24	22	0.335876
TC1100000967.mm.2	Rabep1	0.00410548	0.0754688	24	0	0.30052
TC1100003898.mm.2	Cdc27	0.00410548	0.0754688	24	10	0.219203
TC1200002434.mm.2	Akt1	0.00410548	0.0754688	24	12	0.401283
TC1500000580.mm.2	Grina	0.00410548	0.0754688	24	16	0.39598
TC1500000725.mm.2	Aco2	0.00410548	0.0754688	24	14	0.509117
TC1500001127.mm.2	Hnrnpa1; Gm10052	0.00410548	0.0754688	24	8	0.321734
TC1600000958.mm.2	Bach1	0.00410548	0.0754688	24	8	0.523259
TC1600001527.mm.2	Umps	0.00410548	0.0754688	24	16	0.601041
TC1600002094.mm.2	Rcan1	0.00410548	0.0754688	24	16	1.11369
TC1600002178.mm.2	Litaf	0.00410548	0.0754688	24	2	0.357089
TC1800000265.mm.2	Wdr36	0.00410548	0.0754688	24	14	0.537401
TC0100001174.mm.2	Slc26a9	0.00453887	0.0796759	24	4	0.307591
TC0100002816.mm.2	Myeov2	0.00453887	0.0796759	24	20	0.162635
TC0100003320.mm.2	Tor3a	0.00453887	0.0796759	24	0	0.502046
TC0100003351.mm.2	Cacybp	0.00453887	0.0796759	24	18	0.601041
TC0100003505.mm.2	Hsd17b7	0.00453887	0.0796759	24	12	0.33234
TC0200000354.mm.2	Pdss1	0.00453887	0.0796759	24	14	0.549776
TC0200004651.mm.2	Rnf24	0.00453887	0.0796759	24	10	0.374767
TC0300000221.mm.2	Pik3ca	0.00453887	0.0796759	24	10	0.199758
TC0300000440.mm.2	Tm4sf4	0.00453887	0.0796759	24	6	0.282843
TC0300000771.mm.2	Ube2q1	0.00453887	0.0796759	24	10	0.293449
TC0300000792.mm.2	Gatad2b	0.00453887	0.0796759	24	6	0.487904
TC0300001906.mm.2	1700034I23Rik	0.00453887	0.0796759	24	6	0.30052
TC0400002113.mm.2	Gm20782	0.00453887	0.0796759	24	20	0.413657
TC0400002713.mm.2	Epb41l4b	0.00453887	0.0796759	24	10	0.318198
TC0400002873.mm.2	Tmem261	0.00453887	0.0796759	24	20	0.19799
TC0500001570.mm.2	Cldn3	0.00453887	0.0796759	24	0	0.325269
TC0500002695.mm.2	Ugt2a3	0.00453887	0.0796759	24	16	0.268701
TC0600000609.mm.2	Snx10	0.00453887	0.0796759	24	12	0.563918
TC0600001126.mm.2	Fam19a1	0.00453887	0.0796759	24	2	0.323501
TC0600002919.mm.2	Rpusd3	0.00453887	0.0796759	24	16	0.353553
TC0700000805.mm.2	Aspdh	0.00453887	0.0796759	24	2	0.148492
TC0700001262.mm.2	Rab38	0.00453887	0.0796759	24	2	0.243952
TC0700002628.mm.2	Erf	0.00453887	0.0796759	24	8	0.456084
TC0800002107.mm.2	Cnot7	0.00453887	0.0796759	24	8	0.413657
TC0900000132.mm.2	Chordc1	0.00453887	0.0796759	24	18	0.850296
TC0900000408.mm.2	Olfr910	0.00453887	0.0796759	24	2	0.650538
TC0900000927.mm.2	Myo1e	0.00453887	0.0796759	24	22	0.258094
TC0900001103.mm.2	Bckdhb	0.00453887	0.0796759	24	12	0.212132
TC0900001692.mm.2	Aasdhppt	0.00453887	0.0796759	24	2	0.192687
TC0X00002393.mm.2	BC023829	0.00453887	0.0796759	24	16	0.459619
TC0X00003438.mm.2	Zmat1	0.00453887	0.0796759	24	20	0.346482
TC1000000122.mm.2	Cited2	0.00453887	0.0796759	24	0	0.668216
TC1000000422.mm.2	Prep	0.00453887	0.0796759	24	14	0.318198
TC1000000661.mm.2	Ank3	0.00453887	0.0796759	24	10	0.777817
TC1000001895.mm.2	Enpp3	0.00453887	0.0796759	24	4	0.548008
TC1000002645.mm.2	Chpt1	0.00453887	0.0796759	24	18	0.26163
TC1000002794.mm.2	Tmtc2	0.00453887	0.0796759	24	12	0.526795
TC1100000801.mm.2	Ubb; Gm1821	0.00453887	0.0796759	24	8	0.127279
TC1100001550.mm.2	Lasp1	0.00453887	0.0796759	24	2	0.553311
TC1100003340.mm.2	Tefm	0.00453887	0.0796759	24	18	0.494975
TC1200000498.mm.2	Gemin2	0.00453887	0.0796759	24	14	0.549776
TC1200001880.mm.2	Sav1	0.00453887	0.0796759	24	8	0.275772
TC1200001926.mm.2	Gm11042	0.00453887	0.0796759	24	2	0.438406
TC1300002553.mm.2	Pik3r1	0.00453887	0.0796759	24	14	0.558614
TC1400000747.mm.2	Lrp10	0.00453887	0.0796759	24	8	0.374767
TC1400000810.mm.2	Mphosph8	0.00453887	0.0796759	24	18	0.307591
TC1400001438.mm.2	Acox2	0.00453887	0.0796759	24	2	0.388909
TC1400001741.mm.2	Ccser2	0.00453887	0.0796759	24	16	0.548008
TC1400002837.mm.2	Gm3526	0.00453887	0.0796759	24	4	0.279307
TC1500000587.mm.2	Cyc1	0.00453887	0.0796759	24	18	0.279307
TC1500001102.mm.2	Pcbp2	0.00453887	0.0796759	24	10	0.304056
TC1500002010.mm.2	Celsr1	0.00453887	0.0796759	24	20	0.572756
TC1600000266.mm.2	Klhl24	0.00453887	0.0796759	24	8	0.869741
TC1600000532.mm.2	Rabl3	0.00453887	0.0796759	24	20	0.33234
TC1600001557.mm.2	Dtx3l	0.00453887	0.0796759	24	10	0.148492
TC1900001026.mm.2	Fkbp2	0.00453887	0.0796759	24	22	0.353553
TC1900001630.mm.2	Sh3pxd2a	0.00453887	0.0796759	24	2	0.540937
TC0100001262.mm.2	Kif21b	0.0050625	0.085165	24	4	0.173241
TC0100002601.mm.2	Abcb6	0.0050625	0.085165	24	16	0.4278
TC0100003155.mm.2	Nr5a2	0.0050625	0.085165	24	4	0.325269
TC0200000532.mm.2	Fam73b	0.0050625	0.085165	24	18	0.486136
TC0200000587.mm.2	St6galnac6; St6galnac4	0.0050625	0.085165	24	22	0.540937
TC0200000989.mm.2	4933409G03Rik	0.0050625	0.085165	24	0	0.304056
TC0200003815.mm.2	Zfp385b	0.0050625	0.085165	24	10	0.275772
TC0200004316.mm.2	Gm15130	0.0050625	0.085165	24	16	0.307591
TC0200005091.mm.2	Fitm2	0.0050625	0.085165	24	14	0.431335
TC0300000494.mm.2	Arhgef26	0.0050625	0.085165	24	10	0.473762
TC0300000853.mm.2	S100a10	0.0050625	0.085165	24	2	0.567453
TC0300001482.mm.2	Ddah1	0.0050625	0.085165	24	4	0.185616
TC0300002752.mm.2	Stxbp3	0.0050625	0.085165	24	4	0.219203
TC0400000140.mm.2	Nbn	0.0050625	0.085165	24	10	0.282843
TC0400001307.mm.2	Elovl1	0.0050625	0.085165	24	20	0.282843
TC0400001738.mm.2	Tmco4	0.0050625	0.085165	24	10	0.314663
TC0400004221.mm.2	AU022252	0.0050625	0.085165	24	0	0.240416
TC0500000837.mm.2	5830473C10Rik	0.0050625	0.085165	24	6	0.39598
TC0500001308.mm.2	2410131K14Rik	0.0050625	0.085165	24	20	0.461387
TC0500001531.mm.2	Caln1	0.0050625	0.085165	24	14	0.325269
TC0600001672.mm.2	Slco1b2	0.0050625	0.085165	24	12	0.256326
TC0600003119.mm.2	Tpi1	0.0050625	0.085165	24	20	0.523259
TC0600003316.mm.2	Gsg1	0.0050625	0.085165	24	4	0.288146
TC0700000544.mm.2	Zfp568	0.0050625	0.085165	24	14	0.212132
TC0700001669.mm.2	Pde3b	0.0050625	0.085165	24	16	0.305824
TC0700002535.mm.2	Vmn1r121	0.0050625	0.085165	24	4	0.403051
TC0700002839.mm.2	Chst8	0.0050625	0.085165	24	2	0.296985
TC0700004558.mm.2	Gm10153	0.0050625	0.085165	24	2	0.339411
TC0800001110.mm.2	Nlrc5; Mir7072	0.0050625	0.085165	24	8	0.473762
TC0800001465.mm.2	Map1lc3b	0.0050625	0.085165	24	8	0.258094
TC0900000888.mm.2	Vps13c	0.0050625	0.085165	24	8	0.266933
TC0900001489.mm.2	Dclk3	0.0050625	0.085165	24	16	0.698268
TC0900003119.mm.2	Tmie	0.0050625	0.085165	24	22	0.883883
TC0X00001056.mm.2	Magee1	0.0050625	0.085165	24	18	0.282843
TC0X00001797.mm.2	Rbm3	0.0050625	0.085165	24	14	0.367696
TC0X00002339.mm.2	4930447F04Rik	0.0050625	0.085165	24	0	0.401283
TC1100001681.mm.2	Nags	0.0050625	0.085165	24	22	0.392444
TC1100002029.mm.2	Mrpl12	0.0050625	0.085165	24	16	0.238649
TC1100002715.mm.2	Tcf7	0.0050625	0.085165	24	8	0.247487
TC1100003833.mm.2	Slc4a1	0.0050625	0.085165	24	2	0.452548
TC1300000050.mm.2	Larp4b	0.0050625	0.085165	24	10	0.274004
TC1300000070.mm.2	Heatr1	0.0050625	0.085165	24	16	0.565685
TC1300000568.mm.2	Omd	0.0050625	0.085165	24	22	0.480833
TC1300001374.mm.2	Net1	0.0050625	0.085165	24	0	0.353553
TC1300001382.mm.2	Akr1c20	0.0050625	0.085165	24	18	0.367696
TC1400000246.mm.2	Ppif	0.0050625	0.085165	24	14	0.523259
TC1400001470.mm.2	Thoc7	0.0050625	0.085165	24	14	0.247487
TC1500002048.mm.2	Sbf1	0.0050625	0.085165	24	6	0.367696
TC1600001259.mm.2	Dnm1l	0.0050625	0.085165	24	22	0.236881
TC1700000513.mm.2	Zfand3	0.0050625	0.085165	24	10	0.247487
TC1700000594.mm.2	Ndufa7	0.0050625	0.085165	24	18	0.337643
TC1700001384.mm.2	Tmem181b-ps; Tmem181a	0.0050625	0.085165	24	10	0.282843
TC1700002019.mm.2	H2-M10.2	0.0050625	0.085165	24	2	0.293449
TC1800000708.mm.2	Psmg2	0.0050625	0.085165	24	8	0.256326
TC1800001307.mm.2	Cdo1	0.0050625	0.085165	24	4	0.296985
TC0100000456.mm.2	Nop58	0.00558613	0.0893057	24	16	0.523259
TC0100001786.mm.2	Bpnt1	0.00558613	0.0893057	24	20	0.251023
TC0200001624.mm.2	Bdnf	0.00558613	0.0893057	24	14	0.604576
TC0200002273.mm.2	Scrt2	0.00558613	0.0893057	24	6	0.31643
TC0200002359.mm.2	Itch	0.00558613	0.0893057	24	14	0.226274
TC0200002748.mm.2	Gm14420	0.00558613	0.0893057	24	16	0.452548
TC0200003751.mm.2	Ola1	0.00558613	0.0893057	24	16	0.178544
TC0200005186.mm.2	B4galt5	0.00558613	0.0893057	24	12	0.935149
TC0200005516.mm.2	Tmem189	0.00558613	0.0893057	24	18	0.353553
TC0300000433.mm.2	Mab21l1	0.00558613	0.0893057	24	16	0.169706
TC0300000623.mm.2	Ppid	0.00558613	0.0893057	24	18	0.540937
TC0300001315.mm.2	Casp6	0.00558613	0.0893057	24	8	0.509117
TC0300002173.mm.2	Golim4	0.00558613	0.0893057	24	18	0.219203
TC0400000963.mm.2	Hook1	0.00558613	0.0893057	24	12	0.16617
TC0400001312.mm.2	Ebna1bp2; D4Ertd617e	0.00558613	0.0893057	24	16	0.339411
TC0400001329.mm.2	P3h1	0.00558613	0.0893057	24	22	0.206829
TC0400001612.mm.2	Nr0b2	0.00558613	0.0893057	24	0	0.72832
TC0400001975.mm.2	Rere	0.00558613	0.0893057	24	10	0.33234
TC0400002576.mm.2	Exosc3	0.00558613	0.0893057	24	20	0.137886
TC0400002729.mm.2	D630039A03Rik	0.00558613	0.0893057	24	6	0.77605
TC0400003695.mm.2	Tmem222	0.00558613	0.0893057	24	14	0.26163
TC0400003760.mm.2	Srrm1	0.00558613	0.0893057	24	8	0.155563
TC0400003862.mm.2	Arhgef10l	0.00558613	0.0893057	24	6	0.36416
TC0400003953.mm.2	Gm438	0.00558613	0.0893057	24	8	0.275772
TC0500001769.mm.2	Zfp655	0.00558613	0.0893057	24	6	0.355321
TC0500003312.mm.2	Chchd2	0.00558613	0.0893057	24	22	0.169706
TC0500003451.mm.2	Irs3	0.00558613	0.0893057	24	4	0.233345
TC0600001319.mm.2	Zfp637	0.00558613	0.0893057	24	22	0.314663
TC0600002733.mm.2	Grip2	0.00558613	0.0893057	24	2	0.212132
TC0700000896.mm.2	Nav2	0.00558613	0.0893057	24	6	0.703571
TC0700001709.mm.2	Acsm5	0.00558613	0.0893057	24	10	0.275772
TC0700002636.mm.2	Ceacam2	0.00558613	0.0893057	24	4	0.251023
TC0700002970.mm.2	Nr1h2	0.00558613	0.0893057	24	6	0.468458
TC0700002975.mm.2	Tbc1d17	0.00558613	0.0893057	24	6	0.528562
TC0700004473.mm.2	Mapk1ip1	0.00558613	0.0893057	24	6	0.410122
TC0800000259.mm.2	Defb1	0.00558613	0.0893057	24	2	0.484368
TC0900000609.mm.2	Ppp2r1b	0.00558613	0.0893057	24	4	0.226274
TC0900000692.mm.2	Ptpn9	0.00558613	0.0893057	24	0	0.551543
TC0900001210.mm.2	Tfdp2	0.00558613	0.0893057	24	8	0.367696
TC0900002233.mm.2	Nxpe2	0.00558613	0.0893057	24	6	0.374767
TC0900002328.mm.2	Chrnb4	0.00558613	0.0893057	24	4	0.222739
TC0X00000216.mm.2	Araf	0.00558613	0.0893057	24	8	0.268701
TC0Y00000235.mm.2	Ddx3y	0.00558613	0.0893057	24	8	0.26163
TC0Y00000439.mm.2	Gm20736	0.00558613	0.0893057	24	2	0.551543
TC1000001897.mm.2	Arg1	0.00558613	0.0893057	24	18	0.275772
TC1000003215.mm.2	Sumo3	0.00558613	0.0893057	24	2	0.438406
TC1100000428.mm.2	Ccnjl	0.00558613	0.0893057	24	2	0.346482
TC1100000592.mm.2	Vdac1	0.00558613	0.0893057	24	16	0.219203
TC1100001668.mm.2	Arl4d	0.00558613	0.0893057	24	18	0.378302
TC1100003106.mm.2	Slc25a11	0.00558613	0.0893057	24	16	0.512652
TC1100003455.mm.2	Cltc	0.00558613	0.0893057	24	8	0.208597
TC1100003829.mm.2	Hdac5; Mir8101	0.00558613	0.0893057	24	22	0.304056
TC1200000744.mm.2	Susd6	0.00558613	0.0893057	24	8	0.39598
TC1200001663.mm.2	Ifrd1	0.00558613	0.0893057	24	12	0.422496
TC1200001816.mm.2	Fbxo33	0.00558613	0.0893057	24	16	0.512652
TC1300000187.mm.2	Pom121l2	0.00558613	0.0893057	24	6	0.381838
TC1300001789.mm.2	Pxdc1	0.00558613	0.0893057	24	0	0.703571
TC1400002847.mm.2	Gm3667	0.00558613	0.0893057	24	2	0.424264
TC1500001996.mm.2	5031439G07Rik; Mir1249	0.00558613	0.0893057	24	10	0.346482
TC1600001047.mm.2	Dopey2	0.00558613	0.0893057	24	18	0.399515
TC1600001191.mm.2	Emp2	0.00558613	0.0893057	24	8	0.528562
TC1600001312.mm.2	Tango2	0.00558613	0.0893057	24	18	0.311127
TC1600001373.mm.2	Tmem41a	0.00558613	0.0893057	24	14	0.615183
TC1700000339.mm.2	Pgp	0.00558613	0.0893057	24	16	0.311127
TC1700000410.mm.2	Luc7l	0.00558613	0.0893057	24	18	0.240416
TC1700001644.mm.2	Fahd1	0.00558613	0.0893057	24	20	0.350018
TC1700001805.mm.2	Glo1	0.00558613	0.0893057	24	2	0.381838
TC1900001140.mm.2	Ms4a3	0.00558613	0.0893057	24	8	0.30052
TC1900001600.mm.2	Cuedc2	0.00558613	0.0893057	24	18	0.339411
TC0100000027.mm.2	Pcmtd1	0.00621614	0.0959246	24	12	0.169706
TC0100003095.mm.2	Atp2b4	0.00621614	0.0959246	24	0	0.39598
TC0200000422.mm.2	Edf1	0.00621614	0.0959246	24	16	0.265165
TC0200000459.mm.2	Surf2	0.00621614	0.0959246	24	16	0.360624
TC0200002749.mm.2	Gm14403	0.00621614	0.0959246	24	14	0.685894
TC0200005373.mm.2	Gm14325	0.00621614	0.0959246	24	16	0.434871
TC0300001850.mm.2	Anxa5	0.00621614	0.0959246	24	4	0.270468
TC0300002435.mm.2	Gm10696	0.00621614	0.0959246	24	2	0.410122
TC0300002728.mm.2	Gstm4	0.00621614	0.0959246	24	4	0.30052
TC0400003957.mm.2	Tnfrsf1b	0.00621614	0.0959246	24	10	0.318198
TC0400004118.mm.2	Arhgef16	0.00621614	0.0959246	24	16	0.33234
TC0500000044.mm.2	Sri	0.00621614	0.0959246	24	12	0.335876
TC0500000488.mm.2	Lap3	0.00621614	0.0959246	24	22	0.251023
TC0500001128.mm.2	Zfp932	0.00621614	0.0959246	24	20	0.226274
TC0500001251.mm.2	Pop5	0.00621614	0.0959246	24	18	0.26163
TC0500002650.mm.2	Noa1	0.00621614	0.0959246	24	16	0.4278
TC0600000454.mm.2	Gstk1	0.00621614	0.0959246	24	22	0.190919
TC0600002027.mm.2	Chchd3	0.00621614	0.0959246	24	18	0.0989949
TC0600002385.mm.2	Gprin3	0.00621614	0.0959246	24	8	0.422496
TC0600002567.mm.2	Tet3	0.00621614	0.0959246	24	6	0.254558
TC0600003148.mm.2	Cd9	0.00621614	0.0959246	24	6	0.350018
TC0700002020.mm.2	Olfr45	0.00621614	0.0959246	24	4	0.351786
TC0700003798.mm.2	Rps3; Snord15b	0.00621614	0.0959246	24	18	0.314663
TC0700004095.mm.2	Sbf2	0.00621614	0.0959246	24	8	0.296985
TC0800002842.mm.2	Psmb10	0.00621614	0.0959246	24	14	0.289914
TC0900001067.mm.2	Senp6	0.00621614	0.0959246	24	8	0.190919
TC0X00000742.mm.2	Brcc3	0.00621614	0.0959246	24	18	0.162635
TC0X00001178.mm.2	Pcdh11x	0.00621614	0.0959246	24	12	0.318198
TC0Y00000554.mm.2	Gm10352	0.00621614	0.0959246	24	4	0.314663
TC1000000349.mm.2	Cdk19	0.00621614	0.0959246	24	8	0.431335
TC1000000881.mm.2	Map2k2	0.00621614	0.0959246	24	20	0.194454
TC1000003225.mm.2	Ddt	0.00621614	0.0959246	24	18	0.311127
TC1100003107.mm.2	Pfn1	0.00621614	0.0959246	24	6	0.238649
TC1100003111.mm.2	Inca1	0.00621614	0.0959246	24	4	0.581595
TC1100003447.mm.2	Rps6kb1	0.00621614	0.0959246	24	16	0.344715
TC1200000626.mm.2	Ppm1a	0.00621614	0.0959246	24	10	0.22981
TC1200000675.mm.2	Mthfd1	0.00621614	0.0959246	24	20	0.162635
TC1200000751.mm.2	Smoc1	0.00621614	0.0959246	24	10	0.268701
TC1200001770.mm.2	Ralgapa1	0.00621614	0.0959246	24	14	0.228042
TC1200001938.mm.2	Wdr89; Rplp2-ps1	0.00621614	0.0959246	24	22	0.360624
TC1200002049.mm.2	Zfyve1	0.00621614	0.0959246	24	20	0.240416
TC1200002148.mm.2	Dio2	0.00621614	0.0959246	24	16	0.208597
TC1300000763.mm.2	Mir23b; Mir27b; Mir24-1; 2010111I01Rik	0.00621614	0.0959246	24	12	0.226274
TC1300001949.mm.2	Phf2	0.00621614	0.0959246	24	2	0.296985
TC1300002382.mm.2	Cox7c	0.00621614	0.0959246	24	18	0.127279
TC1300002686.mm.2	Skiv2l2	0.00621614	0.0959246	24	14	0.176777
TC1400001105.mm.2	Elf1	0.00621614	0.0959246	24	6	0.268701
TC1600000447.mm.2	Tfrc	0.00621614	0.0959246	24	20	0.737159
TC1600001781.mm.2	Olfr175-ps1	0.00621614	0.0959246	24	16	0.236881
TC1800000063.mm.2	Colec12	0.00621614	0.0959246	24	20	0.162635
TC0100001176.mm.2	Slc41a1	0.00684614	0.100746	24	10	0.387141
TC0100001969.mm.2	Ncoa2	0.00684614	0.100746	24	4	0.190919
TC0100003786.mm.2	Smyd2	0.00684614	0.100746	24	18	0.208597
TC0100003869.mm.2	Tnni1	0.00684614	0.100746	24	16	0.258094
TC0200004140.mm.2	Cry2	0.00684614	0.100746	24	12	0.452548
TC0200004164.mm.2	Accs	0.00684614	0.100746	24	4	0.503814
TC0200004940.mm.2	Snta1	0.00684614	0.100746	24	16	0.219203
TC0200005349.mm.2	Gm14308	0.00684614	0.100746	24	18	0.434871
TC0200005365.mm.2	Gm14418	0.00684614	0.100746	24	18	0.565685
TC0300000306.mm.2	Slc25a31	0.00684614	0.100746	24	2	0.494975
TC0400000358.mm.2	Ube2r2	0.00684614	0.100746	24	8	0.286378
TC0400000654.mm.2	Ugcg	0.00684614	0.100746	24	8	0.491439
TC0400003172.mm.2	Slc35d1	0.00684614	0.100746	24	10	0.367696
TC0500000661.mm.2	Guf1	0.00684614	0.100746	24	14	0.222739
TC0500001689.mm.2	Nudt1	0.00684614	0.100746	24	0	0.418961
TC0500002065.mm.2	Tomm7	0.00684614	0.100746	24	16	0.26163
TC0500003433.mm.2	Trim56	0.00684614	0.100746	24	10	0.296985
TC0500003576.mm.2	Baiap2l1	0.00684614	0.100746	24	12	0.190919
TC0600001097.mm.2	Nr2c2	0.00684614	0.100746	24	8	0.484368
TC0700000663.mm.2	Ankrd27	0.00684614	0.100746	24	10	0.268701
TC0700000733.mm.2	Zfp788	0.00684614	0.100746	24	16	0.403051
TC0700000867.mm.2	Kdelr1	0.00684614	0.100746	24	8	0.206829
TC0700000978.mm.2	Mtmr10	0.00684614	0.100746	24	14	0.381838
TC0700003908.mm.2	Hbb-bt; Hbb-b2	0.00684614	0.100746	24	20	0.982878
TC0700004604.mm.2	Cttn	0.00684614	0.100746	24	8	0.190919
TC0800000511.mm.2	Mtnr1a	0.00684614	0.100746	24	2	0.500278
TC0800001493.mm.2	Cdt1	0.00684614	0.100746	24	6	0.539169
TC0800002680.mm.2	Aktip	0.00684614	0.100746	24	18	0.311127
TC0800002953.mm.2	Bcar1	0.00684614	0.100746	24	8	0.551543
TC0900000398.mm.2	Olfr147	0.00684614	0.100746	24	4	0.374767
TC0900001411.mm.2	Qrich1	0.00684614	0.100746	24	8	0.344715
TC0900002018.mm.2	Hyls1	0.00684614	0.100746	24	4	0.325269
TC0900002776.mm.2	Ube2cbp	0.00684614	0.100746	24	18	0.434871
TC0X00001377.mm.2	Pih1h3b	0.00684614	0.100746	24	16	0.321734
TC0Y00000058.mm.2	Gm20865	0.00684614	0.100746	24	0	0.471994
TC1000000056.mm.2	Zc3h12d	0.00684614	0.100746	24	2	0.357089
TC1000002280.mm.2	Sirt1	0.00684614	0.100746	24	6	0.289914
TC1000003120.mm.2	Nab2	0.00684614	0.100746	24	2	0.519723
TC1000003169.mm.2	Mettl7b	0.00684614	0.100746	24	16	0.272236
TC1100000238.mm.2	Xpo1	0.00684614	0.100746	24	16	0.355321
TC1100000336.mm.2	Hba-a2; Hba-a1	0.00684614	0.100746	24	18	0.806102
TC1100001095.mm.2	Fam57a	0.00684614	0.100746	24	20	0.417193
TC1100001097.mm.2	Rnmtl1	0.00684614	0.100746	24	14	0.445477
TC1100001183.mm.2	Rab11fip4	0.00684614	0.100746	24	2	0.298753
TC1100003918.mm.2	Smarcd2	0.00684614	0.100746	24	16	0.385373
TC1100004125.mm.2	St6galnac1	0.00684614	0.100746	24	4	0.152028
TC1100004156.mm.2	Usp36	0.00684614	0.100746	24	12	0.335876
TC1200001715.mm.2	Strn3	0.00684614	0.100746	24	16	0.183848
TC1300000405.mm.2	Cdyl	0.00684614	0.100746	24	8	0.19799
TC1300000694.mm.2	Smad5	0.00684614	0.100746	24	10	0.275772
TC1300001270.mm.2	Plpp1	0.00684614	0.100746	24	22	0.484368
TC1300001635.mm.2	Hist1h2bf	0.00684614	0.100746	24	22	0.296985
TC1300002535.mm.2	Gtf2h2	0.00684614	0.100746	24	0	0.526795
TC1400000172.mm.2	Fut11	0.00684614	0.100746	24	16	0.378302
TC1400001931.mm.2	Wdhd1	0.00684614	0.100746	24	16	0.532098
TC1500000072.mm.2	Ugt3a1	0.00684614	0.100746	24	22	0.441942
TC1500002056.mm.2	Arsa	0.00684614	0.100746	24	8	0.645235
TC1600001011.mm.2	Itsn1	0.00684614	0.100746	24	2	0.319966
TC1600001064.mm.2	Dyrk1a	0.00684614	0.100746	24	8	0.342947
TC1700001138.mm.2	Wdr43	0.00684614	0.100746	24	16	0.456084
TC1700002158.mm.2	1600014C23Rik	0.00684614	0.100746	24	6	0.302288
TC1700002420.mm.2	Ankrd12	0.00684614	0.100746	24	14	0.406586
TC1700002430.mm.2	Gm10495	0.00684614	0.100746	24	16	0.113137
TC1800000797.mm.2	Rpl17	0.00684614	0.100746	24	16	0.0742462
TC1800001429.mm.2	Grpel2	0.00684614	0.100746	24	8	0.470226
TC1800001461.mm.2	Fech	0.00684614	0.100746	24	12	0.19799
TC1900000071.mm.2	Efemp2	0.00684614	0.100746	24	2	0.314663
TC1900000928.mm.2	Gm960	0.00684614	0.100746	24	4	0.272236
TC1900001512.mm.2	Rrp12	0.00684614	0.100746	24	18	0.717713
TC1900001705.mm.2	Dclre1a	0.00684614	0.100746	24	14	0.390676
TC0100000334.mm.2	Ercc5	0.007601	0.107577	24	6	0.385373
TC0100000829.mm.2	Dgkd	0.007601	0.107577	24	10	0.438406
TC0100001585.mm.2	Dedd	0.007601	0.107577	24	2	0.208597
TC0100003205.mm.2	Rgs13	0.007601	0.107577	24	0	0.369463
TC0200001049.mm.2	Rapgef4	0.007601	0.107577	24	8	0.811405
TC0200003264.mm.2	D2Wsu81e	0.007601	0.107577	24	18	0.183848
TC0200004269.mm.2	Elp4	0.007601	0.107577	24	22	0.254558
TC0200005383.mm.2	Zfp931	0.007601	0.107577	24	16	0.367696
TC0300000500.mm.2	Mme	0.007601	0.107577	24	18	0.519723
TC0300001530.mm.2	Usp33	0.007601	0.107577	24	16	0.318198
TC0300003194.mm.2	Cth	0.007601	0.107577	24	0	0.403051
TC0400001421.mm.2	Sf3a3	0.007601	0.107577	24	16	0.201525
TC0400003386.mm.2	Ptprf	0.007601	0.107577	24	6	0.344715
TC0500001245.mm.2	Sppl3	0.007601	0.107577	24	4	0.26163
TC0500003184.mm.2	Ptpn11	0.007601	0.107577	24	12	0.259862
TC0600000182.mm.2	Cped1	0.007601	0.107577	24	12	0.215668
TC0600001352.mm.2	Cecr2	0.007601	0.107577	24	8	0.431335
TC0600003491.mm.2	Ndufb2	0.007601	0.107577	24	20	0.254558
TC0700000458.mm.2	Blvrb	0.007601	0.107577	24	18	0.258094
TC0700000551.mm.2	Gm5113	0.007601	0.107577	24	18	0.335876
TC0700000818.mm.2	Gm21948; Il4i1; Nup62	0.007601	0.107577	24	4	0.258094
TC0700004548.mm.2	Tollip	0.007601	0.107577	24	12	0.293449
TC0800000252.mm.2	Gm15315	0.007601	0.107577	24	2	0.339411
TC0800000800.mm.2	Jak3; Insl3	0.007601	0.107577	24	6	0.183848
TC0800001429.mm.2	Klhl36	0.007601	0.107577	24	22	0.385373
TC0800002313.mm.2	Msmo1	0.007601	0.107577	24	10	0.468458
TC0800003000.mm.2	Cdyl2	0.007601	0.107577	24	12	0.374767
TC0900001005.mm.2	Fam214a	0.007601	0.107577	24	16	0.542704
TC0900001042.mm.2	Elovl5	0.007601	0.107577	24	2	0.431335
TC0900001578.mm.2	Xylb	0.007601	0.107577	24	10	0.353553
TC0900002936.mm.2	Nck1	0.007601	0.107577	24	16	0.302288
TC0900003041.mm.2	Gnat1	0.007601	0.107577	24	10	0.597505
TC0X00001760.mm.2	Nudt10	0.007601	0.107577	24	2	0.228042
TC0Y00000254.mm.2	Gm20825	0.007601	0.107577	24	4	0.19799
TC1000000534.mm.2	Pla2g12b	0.007601	0.107577	24	0	0.360624
TC1000001802.mm.2	Abracl	0.007601	0.107577	24	6	0.339411
TC1000002897.mm.2	Rab21	0.007601	0.107577	24	22	0.240416
TC1000003146.mm.2	Myl6b	0.007601	0.107577	24	0	0.169706
TC1100000601.mm.2	Aff4	0.007601	0.107577	24	10	0.19799
TC1100002102.mm.2	Slc35e4	0.007601	0.107577	24	0	0.360624
TC1100002871.mm.2	Tom1l2	0.007601	0.107577	24	8	0.335876
TC1100002894.mm.2	Flii	0.007601	0.107577	24	8	0.286378
TC1100002966.mm.2	Hs3st3b1	0.007601	0.107577	24	2	0.325269
TC1100004071.mm.2	Atp5h	0.007601	0.107577	24	18	0.19799
TC1200001031.mm.2	Ppp4r4	0.007601	0.107577	24	18	0.429567
TC1200001364.mm.2	Fam228b	0.007601	0.107577	24	22	0.494975
TC1300001500.mm.2	Cdk13	0.007601	0.107577	24	8	0.176777
TC1300002436.mm.2	Bhmt	0.007601	0.107577	24	0	0.53033
TC1400002841.mm.2	Gm3468	0.007601	0.107577	24	4	0.314663
TC1500000281.mm.2	4930447A16Rik	0.007601	0.107577	24	2	0.473762
TC1500001320.mm.2	Ankrd33b	0.007601	0.107577	24	16	0.233345
TC1500001642.mm.2	Gm21961	0.007601	0.107577	24	2	0.46669
TC1500001658.mm.2	St3gal1	0.007601	0.107577	24	0	0.493207
TC1500002142.mm.2	Slc38a2	0.007601	0.107577	24	10	0.456084
TC1600000952.mm.2	N6amt1	0.007601	0.107577	24	6	0.30052
TC1600001617.mm.2	4930435E12Rik	0.007601	0.107577	24	2	0.286378
TC1700001606.mm.2	Tceb2	0.007601	0.107577	24	18	0.169706
TC1700002422.mm.2	Ndufv2	0.007601	0.107577	24	18	0.353553
TC1700002775.mm.2	Zfp414	0.007601	0.107577	24	6	0.620486
TC1900000517.mm.2	Pcgf5	0.007601	0.107577	24	12	0.265165
TC0100000255.mm.2	Zap70	0.00835585	0.113974	24	18	0.413657
TC0100000909.mm.2	Olfr1412	0.00835585	0.113974	24	4	0.353553
TC0100002330.mm.2	1700019D03Rik	0.00835585	0.113974	24	4	0.318198
TC0100002963.mm.2	Tmem37	0.00835585	0.113974	24	18	0.383605
TC0200001306.mm.2	Olfr1148	0.00835585	0.113974	24	2	0.28461
TC0200002384.mm.2	Romo1	0.00835585	0.113974	24	20	0.144957
TC0200002814.mm.2	Ppdpf	0.00835585	0.113974	24	22	0.36416
TC0200003155.mm.2	Lcn12	0.00835585	0.113974	24	20	0.749533
TC0200003353.mm.2	Psmd5	0.00835585	0.113974	24	18	0.233345
TC0200003763.mm.2	Atf2	0.00835585	0.113974	24	10	0.120208
TC0200004545.mm.2	Sppl2a	0.00835585	0.113974	24	12	0.176777
TC0200005145.mm.2	Slc35c2	0.00835585	0.113974	24	10	0.321734
TC0200005350.mm.2	Gm14308	0.00835585	0.113974	24	18	0.473762
TC0300000210.mm.2	Skil	0.00835585	0.113974	24	22	0.424264
TC0300000958.mm.2	Pdzk1	0.00835585	0.113974	24	16	0.173241
TC0300002802.mm.2	Vcam1	0.00835585	0.113974	24	14	0.374767
TC0400001736.mm.2	Pla2g2e	0.00835585	0.113974	24	22	0.282843
TC0400002151.mm.2	Cyp7a1	0.00835585	0.113974	24	16	0.922774
TC0400002447.mm.2	Smu1	0.00835585	0.113974	24	10	0.212132
TC0500001596.mm.2	Upk3bl	0.00835585	0.113974	24	8	0.328805
TC0600000447.mm.2	Sval2	0.00835585	0.113974	24	22	0.475529
TC0700001349.mm.2	Ndufc2	0.00835585	0.113974	24	16	0.247487
TC0700002057.mm.2	Ap2a2	0.00835585	0.113974	24	0	0.311127
TC0700004282.mm.2	Eif3c	0.00835585	0.113974	24	10	0.226274
TC0700004525.mm.2	Hras	0.00835585	0.113974	24	18	0.243952
TC0700004659.mm.2	Rnf141	0.00835585	0.113974	24	2	0.240416
TC0800000704.mm.2	Ints10	0.00835585	0.113974	24	20	0.304056
TC0800001400.mm.2	Cmip	0.00835585	0.113974	24	10	0.327037
TC0800003022.mm.2	Mbtps1	0.00835585	0.113974	24	6	0.192687
TC0900001486.mm.2	Epm2aip1	0.00835585	0.113974	24	16	0.339411
TC0900003199.mm.2	Tgfbr2	0.00835585	0.113974	24	14	0.293449
TC0X00000044.mm.2	Nudt11	0.00835585	0.113974	24	4	0.307591
TC0X00000064.mm.2	Wdr45	0.00835585	0.113974	24	10	0.201525
TC0X00003042.mm.2	Tmsb15b2; Tmsb15b1; Tmsb15l	0.00835585	0.113974	24	6	0.72832
TC0Y00000242.mm.2	Rbmy; Gm4064	0.00835585	0.113974	24	2	0.286378
TC1000000540.mm.2	Dnajb12	0.00835585	0.113974	24	12	0.190919
TC1000000842.mm.2	Midn	0.00835585	0.113974	24	6	0.622254
TC1000001282.mm.2	E2f7	0.00835585	0.113974	24	0	0.314663
TC1000001821.mm.2	Slc35d3	0.00835585	0.113974	24	4	0.190919
TC1000002467.mm.2	Plpp2	0.00835585	0.113974	24	12	0.318198
TC1100000339.mm.2	Hba-a1; Hba-a2	0.00835585	0.113974	24	18	0.767211
TC1100000925.mm.2	Tmem256	0.00835585	0.113974	24	16	0.325269
TC1100002836.mm.2	Rnf187	0.00835585	0.113974	24	20	0.243952
TC1100003258.mm.2	Nsrp1; Mir423	0.00835585	0.113974	24	16	0.39598
TC1100004123.mm.2	Cygb	0.00835585	0.113974	24	10	0.353553
TC1200000652.mm.2	Hif1a	0.00835585	0.113974	24	10	0.222739
TC1200001118.mm.2	Slc25a47	0.00835585	0.113974	24	8	0.919239
TC1200001768.mm.2	Nfkbia	0.00835585	0.113974	24	10	0.558614
TC1200002389.mm.2	Hsp90aa1	0.00835585	0.113974	24	20	1.14728
TC1300001737.mm.2	Exoc2	0.00835585	0.113974	24	10	0.233345
TC1300002517.mm.2	Ptcd2	0.00835585	0.113974	24	16	0.205061
TC1400000281.mm.2	Erc2	0.00835585	0.113974	24	2	0.233345
TC1400001783.mm.2	Tspan14	0.00835585	0.113974	24	0	0.403051
TC1500001136.mm.2	Ghr	0.00835585	0.113974	24	14	0.249255
TC1700000347.mm.2	Zfp598	0.00835585	0.113974	24	8	0.289914
TC1700001145.mm.2	Ypel5	0.00835585	0.113974	24	10	0.293449
TC1800000259.mm.2	Ercc3	0.00835585	0.113974	24	14	0.247487
TC1800000641.mm.2	Htr4	0.00835585	0.113974	24	2	0.243952
TC1900000983.mm.2	Scyl1	0.00835585	0.113974	24	10	0.429567
TC0100000639.mm.2	Stk36	0.00925663	0.121773	24	6	0.365928
TC0100001955.mm.2	Arfgef1	0.00925663	0.121773	24	12	0.16617
TC0100003304.mm.2	Xpr1	0.00925663	0.121773	24	10	0.240416
TC0200000477.mm.2	Rxra	0.00925663	0.121773	24	10	0.268701
TC0200001547.mm.2	Fbxo3	0.00925663	0.121773	24	20	0.236881
TC0200003141.mm.2	Ssna1	0.00925663	0.121773	24	20	0.268701
TC0200003680.mm.2	Scn9a	0.00925663	0.121773	24	4	0.394212
TC0400001574.mm.2	Tmem200b	0.00925663	0.121773	24	20	0.212132
TC0400003847.mm.2	Pqlc2	0.00925663	0.121773	24	6	0.266933
TC0500000888.mm.2	40787	0.00925663	0.121773	24	2	0.424264
TC0500002882.mm.2	Hsd17b11	0.00925663	0.121773	24	18	0.120208
TC0600000538.mm.2	Zfp398	0.00925663	0.121773	24	14	0.251023
TC0600001366.mm.2	Pex26	0.00925663	0.121773	24	14	0.544472
TC0600001530.mm.2	Clec2d	0.00925663	0.121773	24	16	0.39598
TC0600002629.mm.2	Dusp11	0.00925663	0.121773	24	10	0.208597
TC0600002722.mm.2	Nup210	0.00925663	0.121773	24	10	0.342947
TC0600002904.mm.2	Srgap3	0.00925663	0.121773	24	0	0.678823
TC0700000399.mm.2	Gm9844	0.00925663	0.121773	24	4	0.424264
TC0700002980.mm.2	Prmt1	0.00925663	0.121773	24	18	0.367696
TC0700004320.mm.2	Dctpp1	0.00925663	0.121773	24	14	0.369463
TC0800000689.mm.2	Tktl2	0.00925663	0.121773	24	22	0.194454
TC0800000831.mm.2	Nwd1	0.00925663	0.121773	24	2	0.339411
TC0800000975.mm.2	Hook2	0.00925663	0.121773	24	10	0.392444
TC0800001362.mm.2	Wwox	0.00925663	0.121773	24	0	0.328805
TC0900000486.mm.2	Trim29	0.00925663	0.121773	24	0	0.206829
TC0900001925.mm.2	Tbx20	0.00925663	0.121773	24	10	0.487904
TC0X00000695.mm.2	Ssr4	0.00925663	0.121773	24	16	0.129047
TC0X00000974.mm.2	Nono	0.00925663	0.121773	24	14	0.304056
TC0X00002266.mm.2	Mmgt1; Mir5116	0.00925663	0.121773	24	18	0.350018
TC1000000693.mm.2	Zwint	0.00925663	0.121773	24	10	0.190919
TC1000000919.mm.2	AU041133	0.00925663	0.121773	24	14	0.49851
TC1000001216.mm.2	Kitl	0.00925663	0.121773	24	16	0.254558
TC1000001542.mm.2	Ctdsp2; Mir26a-2; Mir546	0.00925663	0.121773	24	6	0.675287
TC1000002493.mm.2	Gamt	0.00925663	0.121773	24	16	0.282843
TC1000003090.mm.2	Xrcc6bp1	0.00925663	0.121773	24	14	0.544472
TC1000003105.mm.2	Pip4k2c	0.00925663	0.121773	24	8	0.219203
TC1000003158.mm.2	Suox	0.00925663	0.121773	24	22	0.258094
TC1100000459.mm.2	Clint1	0.00925663	0.121773	24	2	0.160867
TC1100001196.mm.2	Adap2	0.00925663	0.121773	24	16	0.304056
TC1100002018.mm.2	1810043H04Rik	0.00925663	0.121773	24	20	0.314663
TC1100002574.mm.2	Ttc1	0.00925663	0.121773	24	12	0.33234
TC1100002725.mm.2	Hspa4	0.00925663	0.121773	24	18	0.137886
TC1200000679.mm.2	Hspa2	0.00925663	0.121773	24	16	0.304056
TC1200000856.mm.2	Vash1	0.00925663	0.121773	24	14	0.346482
TC1200000988.mm.2	Tdp1	0.00925663	0.121773	24	20	0.26163
TC1200002011.mm.2	Slc10a1	0.00925663	0.121773	24	10	0.254558
TC1300002321.mm.2	Zfp72	0.00925663	0.121773	24	18	0.342947
TC1400002010.mm.2	Gm17078	0.00925663	0.121773	24	0	0.346482
TC1500000784.mm.2	Samm50	0.00925663	0.121773	24	18	0.240416
TC1500001365.mm.2	Cox6c	0.00925663	0.121773	24	20	0.176777
TC1500001596.mm.2	E430025E21Rik	0.00925663	0.121773	24	8	0.22981
TC1500002098.mm.2	Zcrb1	0.00925663	0.121773	24	14	0.26163
TC1600001028.mm.2	2410124H12Rik	0.00925663	0.121773	24	6	0.190919
TC1600001592.mm.2	Gtf2e1	0.00925663	0.121773	24	18	0.289914
TC1600001961.mm.2	Mrpl39	0.00925663	0.121773	24	10	0.160867
TC1700000391.mm.2	Jmjd8	0.00925663	0.121773	24	20	0.180312
TC1800000825.mm.2	Pias2	0.00925663	0.121773	24	10	0.24572
TC1800001396.mm.2	Gm4841	0.00925663	0.121773	24	8	0.289914
TC1900000921.mm.2	Rhod	0.00925663	0.121773	24	2	0.431335
TC1900000999.mm.2	Mrpl49	0.00925663	0.121773	24	18	0.251023
TC0100001859.mm.2	Slc30a1	0.0101574	0.129036	24	16	0.268701
TC0200001314.mm.2	Olfr1161	0.0101574	0.129036	24	20	0.26163
TC0200001889.mm.2	Galk2	0.0101574	0.129036	24	10	0.399515
TC0200002741.mm.2	Gm14295	0.0101574	0.129036	24	16	0.318198
TC0200003174.mm.2	Ubac1	0.0101574	0.129036	24	16	0.335876
TC0200003177.mm.2	C330006A16Rik	0.0101574	0.129036	24	22	0.296985
TC0200003512.mm.2	Rnd3	0.0101574	0.129036	24	8	0.304056
TC0300003196.mm.2	Srsf11	0.0101574	0.129036	24	10	0.155563
TC0400000587.mm.2	Fktn	0.0101574	0.129036	24	18	0.33234
TC0400002732.mm.2	Txndc8	0.0101574	0.129036	24	2	0.367696
TC0400003733.mm.2	Grrp1	0.0101574	0.129036	24	14	0.328805
TC0500002895.mm.2	Gbp10; Gbp6	0.0101574	0.129036	24	4	0.595737
TC0500003660.mm.2	Hsph1	0.0101574	0.129036	24	20	1.25511
TC0600001035.mm.2	Mgll	0.0101574	0.129036	24	14	0.381838
TC0600001636.mm.2	Strap	0.0101574	0.129036	24	14	0.226274
TC0600002253.mm.2	Cycs	0.0101574	0.129036	24	18	0.346482
TC0600003503.mm.2	Herc6	0.0101574	0.129036	24	8	0.311127
TC0700000819.mm.2	Akt1s1; Mir707	0.0101574	0.129036	24	0	0.258094
TC0700001070.mm.2	Fam174b	0.0101574	0.129036	24	20	0.328805
TC0700002529.mm.2	Vmn1r115	0.0101574	0.129036	24	4	0.39598
TC0700002754.mm.2	Lrfn3	0.0101574	0.129036	24	22	0.53033
TC0700003806.mm.2	Neu3	0.0101574	0.129036	24	0	0.353553
TC0800000262.mm.2	Defb10	0.0101574	0.129036	24	4	0.236881
TC0800001833.mm.2	Gm15056	0.0101574	0.129036	24	6	0.449013
TC0800001923.mm.2	Ash2l	0.0101574	0.129036	24	8	0.243952
TC0900000342.mm.2	9230113P08Rik	0.0101574	0.129036	24	4	0.242184
TC0900002367.mm.2	1700017B05Rik	0.0101574	0.129036	24	22	0.353553
TC0900002613.mm.2	Tcf12	0.0101574	0.129036	24	8	0.311127
TC0X00000652.mm.2	Hmgb3	0.0101574	0.129036	24	10	0.325269
TC0X00000682.mm.2	Zfp275	0.0101574	0.129036	24	8	0.304056
TC0X00001407.mm.2	Tmem164	0.0101574	0.129036	24	12	0.293449
TC0X00002741.mm.2	Hdac8	0.0101574	0.129036	24	4	0.353553
TC0Y00000006.mm.2	Eif2s3y	0.0101574	0.129036	24	12	0.235113
TC0Y00000024.mm.2	LOC100040054	0.0101574	0.129036	24	2	0.484368
TC0Y00000156.mm.2	Gm20736	0.0101574	0.129036	24	2	0.53033
TC0Y00000209.mm.2	Gm21095; Sly	0.0101574	0.129036	24	4	0.537401
TC1000002422.mm.2	Fam207a	0.0101574	0.129036	24	16	0.4278
TC1000003047.mm.2	Rassf3	0.0101574	0.129036	24	6	0.487904
TC1100000093.mm.2	Ogdh	0.0101574	0.129036	24	12	0.106066
TC1100003159.mm.2	Ctns	0.0101574	0.129036	24	10	0.144957
TC1100003532.mm.2	Stxbp4	0.0101574	0.129036	24	20	0.190919
TC1200000459.mm.2	1700047I17Rik2; Fam177a	0.0101574	0.129036	24	12	0.226274
TC1200000461.mm.2	1700047I17Rik2; Fam177a	0.0101574	0.129036	24	12	0.226274
TC1200002203.mm.2	Foxn3	0.0101574	0.129036	24	6	0.558614
TC1300000359.mm.2	Wrnip1	0.0101574	0.129036	24	22	0.473762
TC1300002038.mm.2	Rnf44	0.0101574	0.129036	24	4	0.289914
TC1300002299.mm.2	Ndufs6	0.0101574	0.129036	24	20	0.215668
TC1300002619.mm.2	Kif2a	0.0101574	0.129036	24	18	0.194454
TC1400000837.mm.2	Shisa2	0.0101574	0.129036	24	22	0.247487
TC1400002008.mm.2	Gm17175	0.0101574	0.129036	24	0	0.374767
TC1500000423.mm.2	Ndufb9	0.0101574	0.129036	24	20	0.304056
TC1500000432.mm.2	Sqle	0.0101574	0.129036	24	14	0.841457
TC1500002309.mm.2	Cbx5	0.0101574	0.129036	24	18	0.240416
TC1600001177.mm.2	Carhsp1	0.0101574	0.129036	24	6	0.341179
TC1700002240.mm.2	Daam2	0.0101574	0.129036	24	4	0.199758
TC1800001196.mm.2	E230025N22Rik	0.0101574	0.129036	24	2	0.265165
TC1900000226.mm.2	Ms4a4d	0.0101574	0.129036	24	8	0.365928
TC1900000413.mm.2	Gm815	0.0101574	0.129036	24	4	0.282843
TC1900000607.mm.2	4933411K16Rik; Hoga1	0.0101574	0.129036	24	10	0.152028
TC1900001025.mm.2	Plcb3	0.0101574	0.129036	24	4	0.275772
TC0100002503.mm.2	Erbb4	0.0112281	0.138286	24	8	0.579828
TC0100002698.mm.2	Trip12	0.0112281	0.138286	24	16	0.125511
TC0100003374.mm.2	Prdx6	0.0112281	0.138286	24	16	0.240416
TC0200004763.mm.2	Rbbp9	0.0112281	0.138286	24	18	0.173241
TC0200005346.mm.2	Gm2004	0.0112281	0.138286	24	16	0.367696
TC0200005364.mm.2	Gm14412	0.0112281	0.138286	24	16	0.277539
TC0200005491.mm.2	Gm14419	0.0112281	0.138286	24	16	0.367696
TC0300000708.mm.2	Mrpl24	0.0112281	0.138286	24	18	0.254558
TC0300001378.mm.2	Slc39a8	0.0112281	0.138286	24	0	0.392444
TC0300001554.mm.2	Cryz	0.0112281	0.138286	24	12	0.190919
TC0300002580.mm.2	Wdr3	0.0112281	0.138286	24	18	0.392444
TC0300002731.mm.2	Gnai3	0.0112281	0.138286	24	16	0.178544
TC0300003103.mm.2	Dnase2b	0.0112281	0.138286	24	18	0.212132
TC0300003250.mm.2	Slc35a3	0.0112281	0.138286	24	14	0.26163
TC0400001107.mm.2	Dhcr24	0.0112281	0.138286	24	12	0.312895
TC0400001393.mm.2	Heyl	0.0112281	0.138286	24	0	0.22981
TC0400003672.mm.2	Med18	0.0112281	0.138286	24	12	0.26163
TC0500001023.mm.2	Ibsp	0.0112281	0.138286	24	20	0.274004
TC0500002116.mm.2	Gm21671	0.0112281	0.138286	24	2	0.293449
TC0500003466.mm.2	Cyp3a13	0.0112281	0.138286	24	18	0.388909
TC0600000560.mm.2	Repin1	0.0112281	0.138286	24	0	0.265165
TC0600002492.mm.2	Tgoln1; Tgoln2	0.0112281	0.138286	24	2	0.173241
TC0700000293.mm.2	Opa3	0.0112281	0.138286	24	16	0.353553
TC0700000451.mm.2	BC024978	0.0112281	0.138286	24	12	0.282843
TC0700001178.mm.2	Tm6sf1	0.0112281	0.138286	24	10	0.372999
TC0800000271.mm.2	Thsd1	0.0112281	0.138286	24	8	0.201525
TC0800001323.mm.2	Cog4	0.0112281	0.138286	24	14	0.22981
TC0800002852.mm.2	Esrp2	0.0112281	0.138286	24	20	0.13435
TC0800002945.mm.2	Rfwd3	0.0112281	0.138286	24	8	0.226274
TC0900000194.mm.2	Ilf3	0.0112281	0.138286	24	14	0.183848
TC0900002185.mm.2	Atp5l	0.0112281	0.138286	24	18	0.10253
TC0900002213.mm.2	Sidt2	0.0112281	0.138286	24	14	0.258094
TC0900002875.mm.2	Atp1b3	0.0112281	0.138286	24	14	0.318198
TC0900003051.mm.2	Apeh	0.0112281	0.138286	24	14	0.233345
TC0X00001665.mm.2	Pir	0.0112281	0.138286	24	12	0.440174
TC1000002420.mm.2	Adarb1	0.0112281	0.138286	24	12	0.410122
TC1100001592.mm.2	Igfbp4	0.0112281	0.138286	24	14	0.235113
TC1100001705.mm.2	Acbd4	0.0112281	0.138286	24	22	0.346482
TC1100003110.mm.2	Camta2	0.0112281	0.138286	24	6	0.512652
TC1200000828.mm.2	Dlst	0.0112281	0.138286	24	14	0.238649
TC1300001545.mm.2	LOC102641600; Gm11273	0.0112281	0.138286	24	20	0.307591
TC1300001674.mm.2	Nrsn1	0.0112281	0.138286	24	8	0.212132
TC1400001554.mm.2	Ap3m1	0.0112281	0.138286	24	10	0.457852
TC1500000041.mm.2	Rictor	0.0112281	0.138286	24	6	0.212132
TC1500000417.mm.2	D15Ertd621e	0.0112281	0.138286	24	12	0.247487
TC1500000420.mm.2	Trmt12	0.0112281	0.138286	24	18	0.339411
TC1500001749.mm.2	Naprt	0.0112281	0.138286	24	18	0.33234
TC1600002160.mm.2	Zbtb21	0.0112281	0.138286	24	20	0.484368
TC1700001766.mm.2	Srpk1	0.0112281	0.138286	24	18	0.275772
TC1700002344.mm.2	Khsrp	0.0112281	0.138286	24	4	0.130815
TC1800001413.mm.2	Hmgxb3	0.0112281	0.138286	24	12	0.189151
TC1900000011.mm.2	Mtl5	0.0112281	0.138286	24	4	0.272236
TC1900000723.mm.2	Slk	0.0112281	0.138286	24	6	0.296985
TC1900000889.mm.2	Ndufs8	0.0112281	0.138286	24	20	0.268701
TC1900000903.mm.2	Aip	0.0112281	0.138286	24	20	0.417193
TC0100000775.mm.2	4933407L21Rik	0.0122987	0.145656	24	0	0.215668
TC0100002203.mm.2	Coa5	0.0122987	0.145656	24	18	0.123744
TC0100002904.mm.2	Serpinb3d	0.0122987	0.145656	24	2	0.205061
TC0200000888.mm.2	Pkp4	0.0122987	0.145656	24	10	0.254558
TC0200002494.mm.2	Pkig	0.0122987	0.145656	24	6	0.155563
TC0200002869.mm.2	Mcm10	0.0122987	0.145656	24	12	0.449013
TC0200003933.mm.2	Olfr1057	0.0122987	0.145656	24	0	0.274004
TC0300000802.mm.2	S100a16	0.0122987	0.145656	24	18	0.272236
TC0300000914.mm.2	Aph1a	0.0122987	0.145656	24	12	0.13435
TC0300002372.mm.2	Snapin	0.0122987	0.145656	24	8	0.360624
TC0300002419.mm.2	Lce1m	0.0122987	0.145656	24	22	0.434871
TC0400001710.mm.2	Usp48	0.0122987	0.145656	24	14	0.208597
TC0400003255.mm.2	Btf3l4	0.0122987	0.145656	24	6	0.155563
TC0500000349.mm.2	Ywhah	0.0122987	0.145656	24	16	0.353553
TC0500001612.mm.2	Fis1	0.0122987	0.145656	24	16	0.215668
TC0500001673.mm.2	Gpr146; D830046C22Rik	0.0122987	0.145656	24	10	0.438406
TC0500001735.mm.2	Fam220a	0.0122987	0.145656	24	20	0.367696
TC0500001976.mm.2	4930572O03Rik	0.0122987	0.145656	24	0	0.219203
TC0500002115.mm.2	Speer4a; Gm10471	0.0122987	0.145656	24	4	0.388909
TC0500003585.mm.2	Smurf1	0.0122987	0.145656	24	8	0.493207
TC0600000902.mm.2	Eva1a	0.0122987	0.145656	24	8	0.30052
TC0600000943.mm.2	Zfp638	0.0122987	0.145656	24	20	0.238649
TC0600001970.mm.2	Rbm28	0.0122987	0.145656	24	18	0.325269
TC0600002666.mm.2	Isy1	0.0122987	0.145656	24	18	0.272236
TC0700000862.mm.2	Rpl18	0.0122987	0.145656	24	18	0.173241
TC0700001275.mm.2	Picalm	0.0122987	0.145656	24	12	0.127279
TC0700001431.mm.2	Arap1	0.0122987	0.145656	24	2	0.39598
TC0700001951.mm.2	Dock1	0.0122987	0.145656	24	16	0.176777
TC0700002876.mm.2	Ccne1	0.0122987	0.145656	24	10	0.622254
TC0800001694.mm.2	Irs2	0.0122987	0.145656	24	2	0.480833
TC0800001740.mm.2	Rasa3	0.0122987	0.145656	24	10	0.342947
TC0800002175.mm.2	Trappc11	0.0122987	0.145656	24	10	0.0813173
TC0800002314.mm.2	Klhl2	0.0122987	0.145656	24	10	0.26163
TC0800002535.mm.2	Usp38	0.0122987	0.145656	24	18	0.183848
TC0900001038.mm.2	Gclc	0.0122987	0.145656	24	2	0.282843
TC0900001247.mm.2	Cep70	0.0122987	0.145656	24	6	0.296985
TC0900001635.mm.2	Snrk	0.0122987	0.145656	24	16	0.339411
TC0900001858.mm.2	Tyk2	0.0122987	0.145656	24	4	0.325269
TC0X00001766.mm.2	Clcn5	0.0122987	0.145656	24	14	0.330572
TC0Y00000147.mm.2	Gm20736	0.0122987	0.145656	24	2	0.516188
TC0Y00000204.mm.2	Gm21760	0.0122987	0.145656	24	4	0.574524
TC0Y00000206.mm.2	Gm20736	0.0122987	0.145656	24	2	0.516188
TC0Y00000320.mm.2	Gm20736	0.0122987	0.145656	24	2	0.516188
TC1000000531.mm.2	P4ha1	0.0122987	0.145656	24	18	0.802566
TC1000000626.mm.2	Jmjd1c	0.0122987	0.145656	24	22	0.291682
TC1000000810.mm.2	Cdc34	0.0122987	0.145656	24	18	0.254558
TC1000001133.mm.2	Hal	0.0122987	0.145656	24	2	0.535633
TC1000002553.mm.2	Zfp781	0.0122987	0.145656	24	20	0.243952
TC1000002900.mm.2	Tmem19	0.0122987	0.145656	24	18	0.263397
TC1000003049.mm.2	Tbk1	0.0122987	0.145656	24	4	0.205061
TC1000003155.mm.2	Rps26	0.0122987	0.145656	24	18	0.335876
TC1100000192.mm.2	Rab1a	0.0122987	0.145656	24	18	0.19799
TC1100000802.mm.2	Trpv2	0.0122987	0.145656	24	4	0.162635
TC1100001018.mm.2	Shpk	0.0122987	0.145656	24	14	0.360624
TC1100001467.mm.2	Phb	0.0122987	0.145656	24	16	0.233345
TC1300000384.mm.2	Ripk1	0.0122987	0.145656	24	6	0.268701
TC1300002240.mm.2	Zfp708; Rslcan18	0.0122987	0.145656	24	20	0.176777
TC1300002525.mm.2	Cartpt	0.0122987	0.145656	24	4	0.30052
TC1400000413.mm.2	Mbl1	0.0122987	0.145656	24	0	0.362392
TC1400001054.mm.2	Lcp1	0.0122987	0.145656	24	10	0.203293
TC1500002076.mm.2	Slc2a13	0.0122987	0.145656	24	14	0.226274
TC1600000436.mm.2	Rnf168	0.0122987	0.145656	24	18	0.176777
TC1600000448.mm.2	Tnk2	0.0122987	0.145656	24	2	0.30052
TC1700000277.mm.2	Gm10509	0.0122987	0.145656	24	16	0.325269
TC1700000494.mm.2	Srsf3	0.0122987	0.145656	24	16	0.311127
TC1700001621.mm.2	1600002H07Rik	0.0122987	0.145656	24	20	0.46669
TC1700002764.mm.2	Sft2d1	0.0122987	0.145656	24	10	0.307591
TC1800000184.mm.2	Mapre2	0.0122987	0.145656	24	14	0.452548
TC1900000077.mm.2	Rnaseh2c	0.0122987	0.145656	24	0	0.381838
TC1900000232.mm.2	Mrpl16	0.0122987	0.145656	24	18	0.22981
TC1900001617.mm.2	Nt5c2	0.0122987	0.145656	24	14	0.378302
TC4_JH584294_random00000006.mm.2	Il11ra2	0.0122987	0.145656	24	22	0.30052
TC0100000071.mm.2	Xkr9	0.0135663	0.155606	24	10	0.275772
TC0100002285.mm.2	Slc40a1	0.0135663	0.155606	24	10	0.457852
TC0100002604.mm.2	Tuba4a	0.0135663	0.155606	24	0	0.59397
TC0100002887.mm.2	Rnf152	0.0135663	0.155606	24	8	0.41189
TC0100002900.mm.2	Vps4b	0.0135663	0.155606	24	4	0.130815
TC0100003524.mm.2	Fcgr3	0.0135663	0.155606	24	18	0.351786
TC0100003739.mm.2	44257	0.0135663	0.155606	24	16	0.22981
TC0200001819.mm.2	Wdr76	0.0135663	0.155606	24	18	0.254558
TC0200001985.mm.2	Ptpra	0.0135663	0.155606	24	4	0.217435
TC0200002850.mm.2	Suv39h2	0.0135663	0.155606	24	22	0.353553
TC0200004046.mm.2	Olfr1225	0.0135663	0.155606	24	8	0.259862
TC0200004066.mm.2	Olfr1248	0.0135663	0.155606	24	22	0.371231
TC0200004819.mm.2	Gm10750	0.0135663	0.155606	24	2	0.311127
TC0200005132.mm.2	Acot8	0.0135663	0.155606	24	16	0.258094
TC0300001587.mm.2	Depdc1a	0.0135663	0.155606	24	6	0.355321
TC0300003214.mm.2	Scamp3	0.0135663	0.155606	24	14	0.339411
TC0400001039.mm.2	Lepr	0.0135663	0.155606	24	12	0.473762
TC0400002016.mm.2	Acot7	0.0135663	0.155606	24	14	0.388909
TC0400002572.mm.2	Tomm5	0.0135663	0.155606	24	18	0.378302
TC0500000905.mm.2	Gm3139	0.0135663	0.155606	24	2	0.233345
TC0500002085.mm.2	Abcf2	0.0135663	0.155606	24	14	0.304056
TC0500002933.mm.2	Evi5	0.0135663	0.155606	24	2	0.30052
TC0600000412.mm.2	Tas2r137	0.0135663	0.155606	24	22	0.4278
TC0600003610.mm.2	Klra8; Klra21; Klra14-ps; Klra3	0.0135663	0.155606	24	10	0.424264
TC0700000444.mm.2	Cyp2g1	0.0135663	0.155606	24	8	0.457852
TC0700000913.mm.2	Slc17a6	0.0135663	0.155606	24	0	0.155563
TC0700000991.mm.2	Chsy1	0.0135663	0.155606	24	10	0.201525
TC0700001264.mm.2	Fzd4	0.0135663	0.155606	24	12	0.286378
TC0700001886.mm.2	Bag3	0.0135663	0.155606	24	16	0.66468
TC0700002538.mm.2	Vmn1r126	0.0135663	0.155606	24	4	0.28461
TC0700002545.mm.2	Gm4214; Gm4175	0.0135663	0.155606	24	4	0.28461
TC0700002574.mm.2	Gm4175; Gm4214	0.0135663	0.155606	24	4	0.28461
TC0700002800.mm.2	Scgb2b12	0.0135663	0.155606	24	22	0.325269
TC0700004431.mm.2	Adam12	0.0135663	0.155606	24	4	0.187383
TC0700004512.mm.2	Ifitm5	0.0135663	0.155606	24	14	0.160867
TC0800001733.mm.2	Dcun1d2	0.0135663	0.155606	24	18	0.169706
TC0900000601.mm.2	Timm8b	0.0135663	0.155606	24	16	0.176777
TC0900001616.mm.2	Trak1	0.0135663	0.155606	24	12	0.516188
TC0X00002527.mm.2	Gm7173; Chdc2	0.0135663	0.155606	24	2	0.318198
TC0X00003301.mm.2	Reps2	0.0135663	0.155606	24	6	0.408354
TC0Y00000161.mm.2	Sly	0.0135663	0.155606	24	4	0.392444
TC0Y00000293.mm.2	LOC100862113	0.0135663	0.155606	24	2	0.473762
TC1000001110.mm.2	Ikbip	0.0135663	0.155606	24	4	0.39598
TC1000001941.mm.2	Cenpw	0.0135663	0.155606	24	4	0.327037
TC1000002783.mm.2	Lrriq1	0.0135663	0.155606	24	0	0.247487
TC1100001770.mm.2	Dcaf7	0.0135663	0.155606	24	6	0.164402
TC1100002043.mm.2	Aspscr1	0.0135663	0.155606	24	18	0.116673
TC1200000994.mm.2	Calm1	0.0135663	0.155606	24	20	0.148492
TC1300001649.mm.2	Slc17a4	0.0135663	0.155606	24	2	0.445477
TC1300001761.mm.2	D930007J09Rik	0.0135663	0.155606	24	0	0.231577
TC1500001727.mm.2	Ly6i	0.0135663	0.155606	24	16	0.286378
TC1500001933.mm.2	Polr3h	0.0135663	0.155606	24	14	0.357089
TC1600001648.mm.2	Gtpbp8	0.0135663	0.155606	24	20	0.173241
TC1700001021.mm.2	Alkbh7	0.0135663	0.155606	24	0	0.265165
TC1800000509.mm.2	Hsd17b4	0.0135663	0.155606	24	18	0.155563
TC1900000065.mm.2	AI837181	0.0135663	0.155606	24	4	0.424264
TC1900000230.mm.2	Oosp3	0.0135663	0.155606	24	6	0.304056
TC1900000583.mm.2	Dntt	0.0135663	0.155606	24	16	0.222739
TC1900000957.mm.2	Sf3b2	0.0135663	0.155606	24	14	0.39598
TC1900001778.mm.2	Cfap43	0.0135663	0.155606	24	2	0.381838
TC5_JH584296_random00000002.mm.2	Gm3139	0.0135663	0.155606	24	2	0.233345
TC0100001202.mm.2	Ppp1r15b	0.0148339	0.163718	24	18	0.249255
TC0100003273.mm.2	Lamc1	0.0148339	0.163718	24	10	0.222739
TC0100003531.mm.2	Pcp4l1	0.0148339	0.163718	24	20	0.403051
TC0200000006.mm.2	Dclre1c	0.0148339	0.163718	24	10	0.33234
TC0200000009.mm.2	Cdnf	0.0148339	0.163718	24	20	0.233345
TC0200001972.mm.2	Nop56; Snord57	0.0148339	0.163718	24	16	0.517956
TC0200002318.mm.2	Dnmt3b	0.0148339	0.163718	24	0	0.595737
TC0200002453.mm.2	Plcg1	0.0148339	0.163718	24	10	0.410122
TC0200002945.mm.2	Itih2	0.0148339	0.163718	24	6	0.190919
TC0200003579.mm.2	Acvr1	0.0148339	0.163718	24	14	0.304056
TC0200004228.mm.2	Nat10	0.0148339	0.163718	24	18	0.494975
TC0300002714.mm.2	Strip1	0.0148339	0.163718	24	20	0.272236
TC0400000162.mm.2	Cngb3	0.0148339	0.163718	24	18	0.212132
TC0400001935.mm.2	Masp2	0.0148339	0.163718	24	18	0.120208
TC0400002551.mm.2	Rnf38	0.0148339	0.163718	24	6	0.438406
TC0400002945.mm.2	Ttc39b	0.0148339	0.163718	24	10	0.242184
TC0400003163.mm.2	Gm12790	0.0148339	0.163718	24	2	0.328805
TC0400003749.mm.2	Tmem50a	0.0148339	0.163718	24	12	0.240416
TC0400003842.mm.2	Minos1	0.0148339	0.163718	24	20	0.152028
TC0500002953.mm.2	Slc26a1	0.0148339	0.163718	24	14	0.33234
TC0500003169.mm.2	Tpcn1	0.0148339	0.163718	24	14	0.385373
TC0600000128.mm.2	Cav1	0.0148339	0.163718	24	0	0.212132
TC0600000839.mm.2	Polr1a	0.0148339	0.163718	24	16	0.479065
TC0600001733.mm.2	Fgfr1op2	0.0148339	0.163718	24	8	0.183848
TC0600001944.mm.2	Wasl	0.0148339	0.163718	24	6	0.410122
TC0600003302.mm.2	Lrp6	0.0148339	0.163718	24	8	0.374767
TC0700000564.mm.2	Prodh2	0.0148339	0.163718	24	18	0.236881
TC0700003726.mm.2	Tmem126a	0.0148339	0.163718	24	16	0.307591
TC0800000550.mm.2	Rwdd4a	0.0148339	0.163718	24	16	0.339411
TC0800000659.mm.2	Ddx60	0.0148339	0.163718	24	6	0.318198
TC0800000783.mm.2	Use1	0.0148339	0.163718	24	10	0.205061
TC0800001133.mm.2	Mmp15	0.0148339	0.163718	24	12	0.388909
TC0800002393.mm.2	Tmem59l	0.0148339	0.163718	24	2	0.296985
TC0800002593.mm.2	Calr	0.0148339	0.163718	24	2	0.219203
TC0800002750.mm.2	Cnot1	0.0148339	0.163718	24	4	0.113137
TC0800003071.mm.2	Snai3	0.0148339	0.163718	24	4	0.358857
TC0900000845.mm.2	Spg21	0.0148339	0.163718	24	6	0.355321
TC0900001373.mm.2	Rassf1	0.0148339	0.163718	24	8	0.318198
TC0900001402.mm.2	Gpx1	0.0148339	0.163718	24	22	0.083085
TC0X00001784.mm.2	Pqbp1	0.0148339	0.163718	24	20	0.233345
TC0X00003003.mm.2	Nxf2	0.0148339	0.163718	24	14	0.328805
TC0Y00000193.mm.2	Gm20736	0.0148339	0.163718	24	2	0.509117
TC0Y00000198.mm.2	Gm20736	0.0148339	0.163718	24	2	0.388909
TC0Y00000200.mm.2	Gm20736	0.0148339	0.163718	24	2	0.440174
TC1000000399.mm.2	Bend3	0.0148339	0.163718	24	6	0.33234
TC1000000674.mm.2	Slc16a9	0.0148339	0.163718	24	2	0.258094
TC1000001601.mm.2	Ankrd52; Mir6914	0.0148339	0.163718	24	8	0.463155
TC1000002776.mm.2	4930430F08Rik	0.0148339	0.163718	24	18	0.350018
TC1100000537.mm.2	3010026O09Rik	0.0148339	0.163718	24	4	0.590434
TC1100000995.mm.2	Mybbp1a	0.0148339	0.163718	24	16	0.254558
TC1100002366.mm.2	1700093K21Rik	0.0148339	0.163718	24	2	0.431335
TC1100002449.mm.2	Erlec1	0.0148339	0.163718	24	10	0.183848
TC1100003173.mm.2	Olfr385	0.0148339	0.163718	24	2	0.325269
TC1100003204.mm.2	Sgsm2	0.0148339	0.163718	24	0	0.289914
TC1200000068.mm.2	Pum2	0.0148339	0.163718	24	4	0.233345
TC1200000140.mm.2	Nol10	0.0148339	0.163718	24	16	0.374767
TC1200001900.mm.2	Ccdc175	0.0148339	0.163718	24	0	0.339411
TC1200002493.mm.2	Wdr60	0.0148339	0.163718	24	0	0.236881
TC1300000396.mm.2	Prpf4b	0.0148339	0.163718	24	16	0.222739
TC1300000514.mm.2	Jarid2	0.0148339	0.163718	24	14	0.519723
TC1300002055.mm.2	Lman2	0.0148339	0.163718	24	18	0.31643
TC1400001902.mm.2	Fermt2	0.0148339	0.163718	24	0	0.275772
TC1400002067.mm.2	Slc7a8	0.0148339	0.163718	24	4	0.319966
[truncated: 1,355 more rows]

## Sheet: Sheet 2
CycID	Gene.Symbol	JTK_pvalue	JTK_BH.Q	JTK_period	JTK_adjphase	JTK_amplitude
TC0300000864.mm.2	Rorc	4.39983e-11	4.88513e-07	24	20	2.35467
TC0700001660.mm.2	Arntl	4.39983e-11	4.88513e-07	24	0	2.22739
TC0700002056.mm.2	Tspan4	2.14851e-09	1.19275e-05	24	16	1.13137
TC1700001822.mm.2	Cbs	2.14851e-09	1.19275e-05	24	4	0.986414
TC0700000861.mm.2	Dbp	7.82795e-09	3.47655e-05	24	12	3.56028
TC0700004176.mm.2	Gde1	6.06895e-08	0.000168459	24	16	0.675287
TC1400001499.mm.2	Nr1d2	6.06895e-08	0.000168459	24	10	1.91096
TC1500000731.mm.2	Tef	6.06895e-08	0.000168459	24	12	0.763675
TC1100003688.mm.2	Nr1d1	1.28621e-07	0.000285617	24	10	2.24153
TC1400001906.mm.2	Ddhd1; Mir5131	1.28621e-07	0.000285617	24	0	0.645235
TC0400001034.mm.2	Ak4	2.12091e-07	0.000392474	24	14	0.867974
TC0400004074.mm.2	Per3	2.12091e-07	0.000392474	24	14	1.75893
TC1000002509.mm.2	Mknk2	2.78001e-07	0.000474868	24	16	0.742462
TC0100001788.mm.2	Slc30a10	3.43911e-07	0.000545491	24	0	1.19855
TC0200001951.mm.2	Slc20a1	4.46431e-07	0.000660897	24	14	0.678823
TC0100000393.mm.2	Coq10b	5.48952e-07	0.00071706	24	12	0.860903
TC0900001377.mm.2	Ifrd2	5.48952e-07	0.00071706	24	16	0.608112
TC0300000967.mm.2	Fmo5	8.6337e-07	0.00100905	24	16	0.675287
TC1000002605.mm.2	Cry1	8.6337e-07	0.00100905	24	22	0.968736
TC0100000282.mm.2	Npas2	1.33905e-06	0.00135159	24	2	1.59099
TC0300002605.mm.2	Atp1a1	1.33905e-06	0.00135159	24	16	0.39598
TC0700004265.mm.2	Xpo6	1.33905e-06	0.00135159	24	8	0.328805
TC0400000496.mm.2	Stra6l	1.69433e-06	0.00163584	24	2	0.77605
TC0200004140.mm.2	Cry2	2.04961e-06	0.00168569	24	18	0.823779
TC0300001137.mm.2	Sort1	2.04961e-06	0.00168569	24	6	0.820244
TC1500001088.mm.2	Tns2	2.04961e-06	0.00168569	24	10	0.509117
TC1800000160.mm.2	Rnf125	2.04961e-06	0.00168569	24	2	1.68468
TC1200000503.mm.2	Ctage5	2.57392e-06	0.00185944	24	12	0.367696
TC1900000636.mm.2	Abcc2	2.57392e-06	0.00185944	24	10	0.406586
TC0300000354.mm.2	Noct	3.09824e-06	0.00185944	24	16	1.70413
TC0400002373.mm.2	Pnrc1	3.09824e-06	0.00185944	24	2	0.841457
TC0500000536.mm.2	Slc34a2	3.09824e-06	0.00185944	24	0	2.05061
TC0500002642.mm.2	Ppat	3.09824e-06	0.00185944	24	14	0.643467
TC0700001624.mm.2	Wee1	3.09824e-06	0.00185944	24	16	1.492
TC1000002043.mm.2	Amd2; Amd1	3.09824e-06	0.00185944	24	14	0.555079
TC1200000279.mm.2	Nampt	3.09824e-06	0.00185944	24	16	0.641699
TC1400001303.mm.2	Mbnl2	3.09824e-06	0.00185944	24	16	0.438406
TC1800000665.mm.2	Nedd4l	3.86319e-06	0.00225753	24	0	0.544472
TC0100002963.mm.2	Tmem37	4.62814e-06	0.00244696	24	18	0.62579
TC0200001843.mm.2	Sord	4.62814e-06	0.00244696	24	14	0.321734
TC0500001775.mm.2	Cyp3a59	4.62814e-06	0.00244696	24	10	0.608112
TC1100002314.mm.2	Lgalsl	4.62814e-06	0.00244696	24	0	1.13844
TC0100002964.mm.2	Dbi	5.73203e-06	0.00276707	24	6	0.212132
TC0200000740.mm.2	Kynu	5.73203e-06	0.00276707	24	2	0.357089
TC0400003862.mm.2	Arhgef10l	5.73203e-06	0.00276707	24	6	0.406586
TC0700004474.mm.2	Bnip3	5.73203e-06	0.00276707	24	14	0.624022
TC0100002801.mm.2	Per2	6.83591e-06	0.00297644	24	16	1.5521
TC0400002251.mm.2	Ripk2	6.83591e-06	0.00297644	24	10	0.445477
TC0500001517.mm.2	Vkorc1l1	6.83591e-06	0.00297644	24	16	0.242184
TC1500002246.mm.2	Smagp	6.83591e-06	0.00297644	24	2	0.855599
TC1600002160.mm.2	Zbtb21	6.83591e-06	0.00297644	24	20	0.464923
TC0600000362.mm.2	Trim24	8.41239e-06	0.00359241	24	6	0.624022
TC0100002969.mm.2	Insig2	9.98887e-06	0.00389145	24	2	0.797263
TC0200003195.mm.2	Agpat2	9.98887e-06	0.00389145	24	22	0.597505
TC0200003654.mm.2	Grb14	9.98887e-06	0.00389145	24	6	0.30052
TC0600003374.mm.2	Gys2	9.98887e-06	0.00389145	24	14	0.763675
TC1100001149.mm.2	Rab34	9.98887e-06	0.00389145	24	10	0.4826
TC0100001684.mm.2	Desi2	1.4447e-05	0.00493555	24	0	0.378302
TC0100002121.mm.2	Ptp4a1; Gm13363	1.4447e-05	0.00493555	24	16	0.394212
TC0500002346.mm.2	Lcorl	1.4447e-05	0.00493555	24	14	0.473762
TC0600000839.mm.2	Polr1a	1.4447e-05	0.00493555	24	16	0.388909
TC1100000900.mm.2	Per1	1.4447e-05	0.00493555	24	14	1.77307
TC1300001006.mm.2	Hapln1	1.4447e-05	0.00493555	24	20	1.36472
TC1700000496.mm.2	Cdkn1a	1.4447e-05	0.00493555	24	22	1.49907
TC1900000610.mm.2	Marveld1	1.4447e-05	0.00493555	24	16	0.618718
TC0500003000.mm.2	Ulk1	1.75689e-05	0.00573729	24	8	0.767211
TC1000002453.mm.2	Pdxk	1.75689e-05	0.00573729	24	18	0.601041
TC1200000679.mm.2	Hspa2	1.75689e-05	0.00573729	24	18	0.424264
TC0900000835.mm.2	Clpx	2.50235e-05	0.00782636	24	0	0.956362
TC0X00002825.mm.2	Magt1	2.50235e-05	0.00782636	24	20	0.473762
TC1800001307.mm.2	Cdo1	2.50235e-05	0.00782636	24	6	0.258094
TC0700003988.mm.2	Rrp8	2.93561e-05	0.00835746	24	16	0.459619
TC0800001477.mm.2	Banp	2.93561e-05	0.00835746	24	16	0.516188
TC0800002144.mm.2	Klkb1; Cyp4v3	2.93561e-05	0.00835746	24	8	0.381838
TC1200002506.mm.2	Dnah11	2.93561e-05	0.00835746	24	8	1.18617
TC1400001177.mm.2	Lmo7	2.93561e-05	0.00835746	24	16	0.438406
TC1800001595.mm.2	Lipg	2.93561e-05	0.00835746	24	14	0.691197
TC1900001630.mm.2	Sh3pxd2a	2.93561e-05	0.00835746	24	2	0.731856
TC0900002857.mm.2	1190002N15Rik	3.53165e-05	0.00956388	24	16	0.537401
TC1000000574.mm.2	Aifm2	3.53165e-05	0.00956388	24	16	0.707107
TC1300002013.mm.2	Nfil3	3.53165e-05	0.00956388	24	22	0.832618
TC1900001425.mm.2	Slc16a12	3.53165e-05	0.00956388	24	12	0.431335
TC1100002225.mm.2	Ddc	4.12769e-05	0.0107835	24	0	1.11546
TC1900000801.mm.2	Nhlrc2	4.12769e-05	0.0107835	24	14	0.367696
TC1900001163.mm.2	Dtx4	4.12769e-05	0.0107835	24	0	0.56215
TC0100003443.mm.2	Dcaf6	4.94077e-05	0.0123275	24	8	0.579828
TC0400003653.mm.2	Epb41	4.94077e-05	0.0123275	24	12	0.509117
TC0900001099.mm.2	Sh3bgrl2	4.94077e-05	0.0123275	24	10	0.413657
TC1500002180.mm.2	Ccnt1	4.94077e-05	0.0123275	24	18	0.355321
TC0100003747.mm.2	Iars2	5.75386e-05	0.0131722	24	8	0.296985
TC0200002990.mm.2	Hacd1	5.75386e-05	0.0131722	24	16	0.279307
TC0500003314.mm.2	Asl	5.75386e-05	0.0131722	24	18	1.04298
TC0600002121.mm.2	Slc37a3	5.75386e-05	0.0131722	24	6	0.555079
TC0900000669.mm.2	Ube2q2	5.75386e-05	0.0131722	24	12	0.410122
TC1000001133.mm.2	Hal	5.75386e-05	0.0131722	24	4	0.772514
TC1000002338.mm.2	A930033H14Rik	5.75386e-05	0.0131722	24	12	1.21976
TC1600001419.mm.2	Cldn1	5.75386e-05	0.0131722	24	2	0.806102
TC0400001641.mm.2	Paqr7	6.85408e-05	0.0150695	24	16	0.721249
TC0500001842.mm.2	Uspl1	6.85408e-05	0.0150695	24	18	0.413657
TC1500001764.mm.2	Nrbp2	6.85408e-05	0.0150695	24	20	0.569221
TC1700000973.mm.2	Rab5a	6.85408e-05	0.0150695	24	8	0.265165
TC0200005094.mm.2	Serinc3	7.9543e-05	0.0156312	24	16	0.187383
TC0200005475.mm.2	Dusp19	7.9543e-05	0.0156312	24	22	0.367696
TC0400001307.mm.2	Elovl1	7.9543e-05	0.0156312	24	22	0.304056
TC0400003894.mm.2	Efhd2	7.9543e-05	0.0156312	24	16	0.502046
TC0500003601.mm.2	Cyp3a25	7.9543e-05	0.0156312	24	10	0.410122
TC0600000182.mm.2	Cped1	7.9543e-05	0.0156312	24	8	0.374767
TC0600003475.mm.2	Dennd5b	7.9543e-05	0.0156312	24	10	0.318198
TC0700000420.mm.2	Atp5sl	7.9543e-05	0.0156312	24	10	0.365928
TC0700000488.mm.2	Dyrk1b	7.9543e-05	0.0156312	24	6	0.703571
TC0700002783.mm.2	Hamp	7.9543e-05	0.0156312	24	20	0.406586
TC0800002146.mm.2	Tlr3	7.9543e-05	0.0156312	24	22	0.558614
TC0900001399.mm.2	Amt	7.9543e-05	0.0156312	24	4	0.717713
TC0400001509.mm.2	Ak2	9.43146e-05	0.0177487	24	16	0.507349
TC0600001422.mm.2	C1ra	9.43146e-05	0.0177487	24	16	0.219203
TC0600001917.mm.2	Tspan12	9.43146e-05	0.0177487	24	10	0.323501
TC0800001106.mm.2	Herpud1	9.43146e-05	0.0177487	24	10	0.763675
TC1700000047.mm.2	Synj2	9.43146e-05	0.0177487	24	12	0.993485
TC0100003093.mm.2	Zbed6; Zc3h11a	0.000109086	0.0189248	24	10	0.319966
TC0200000585.mm.2	Fam102a	0.000109086	0.0189248	24	16	0.809637
TC0200001972.mm.2	Nop56; Snord57	0.000109086	0.0189248	24	16	0.470226
TC0300001494.mm.2	Uox	0.000109086	0.0189248	24	14	0.494975
TC0300002718.mm.2	Csf1	0.000109086	0.0189248	24	18	0.723017
TC0300003077.mm.2	Sh3glb1	0.000109086	0.0189248	24	14	0.312895
TC0800000977.mm.2	Tnpo2	0.000109086	0.0189248	24	10	0.268701
TC1000001020.mm.2	Tcp11l2	0.000109086	0.0189248	24	8	1.14375
TC1100001895.mm.2	Slc16a5	0.000109086	0.0189248	24	18	1.25865
TC1200002518.mm.2	Asap2	0.000109086	0.0189248	24	2	0.707107
TC0100002308.mm.2	Myo1b	0.00012877	0.0210255	24	0	0.445477
TC0200002876.mm.2	Camk1d	0.00012877	0.0210255	24	2	0.631093
TC0200003753.mm.2	Gpr155	0.00012877	0.0210255	24	20	0.79196
TC0400001570.mm.2	Srsf4	0.00012877	0.0210255	24	14	0.26163
TC0900002604.mm.2	Aqp9	0.00012877	0.0210255	24	8	0.675287
TC1100002664.mm.2	Sqstm1	0.00012877	0.0210255	24	8	0.307591
TC1500001658.mm.2	St3gal1	0.00012877	0.0210255	24	2	0.512652
TC1700000975.mm.2	Kat2b	0.00012877	0.0210255	24	10	0.558614
TC0100000464.mm.2	Fam117b	0.000148454	0.0221246	24	10	0.374767
TC0200001015.mm.2	Ubr3	0.000148454	0.0221246	24	8	0.410122
TC0200002869.mm.2	Mcm10	0.000148454	0.0221246	24	12	0.714178
TC0200004487.mm.2	Catsper2	0.000148454	0.0221246	24	20	0.463155
TC0500001818.mm.2	Pomp	0.000148454	0.0221246	24	6	0.222739
TC0700004630.mm.2	Hsd3b7	0.000148454	0.0221246	24	2	0.986414
TC0900001633.mm.2	Fam198a	0.000148454	0.0221246	24	2	0.662913
TC1100000994.mm.2	Ggt6	0.000148454	0.0221246	24	22	0.714178
TC1100001047.mm.2	Cluh	0.000148454	0.0221246	24	4	0.312895
TC1100003993.mm.2	Fam20a	0.000148454	0.0221246	24	6	0.44371
TC1200000142.mm.2	Odc1	0.000148454	0.0221246	24	18	0.753069
TC1200001544.mm.2	Id2	0.000148454	0.0221246	24	22	0.510885
TC1600002080.mm.2	Tmem50b	0.000148454	0.0221246	24	18	0.471994
TC0100002690.mm.2	Pid1	0.000174493	0.0248384	24	4	0.426032
TC0200002749.mm.2	Gm14403	0.000174493	0.0248384	24	16	0.601041
TC0200003307.mm.2	Fpgs; Mir8093	0.000174493	0.0248384	24	2	0.325269
TC0300002728.mm.2	Gstm4	0.000174493	0.0248384	24	6	0.599273
TC0600000648.mm.2	Chn2	0.000174493	0.0248384	24	14	0.282843
TC0600002966.mm.2	Tmcc1	0.000174493	0.0248384	24	16	0.507349
TC1500001809.mm.2	Apol9a	0.000174493	0.0248384	24	0	0.76014
TC0100000055.mm.2	Prex2	0.000200532	0.0266647	24	16	0.369463
TC0100001353.mm.2	Trmt1l	0.000200532	0.0266647	24	18	0.4278
TC0500001796.mm.2	Rasl11a	0.000200532	0.0266647	24	22	0.286378
TC0800002142.mm.2	F11	0.000200532	0.0266647	24	8	0.374767
TC0800002529.mm.2	Gab1	0.000200532	0.0266647	24	14	0.44371
TC0X00001715.mm.2	Gm21887	0.000200532	0.0266647	24	22	1.30108
TC0X00003075.mm.2	Tsc22d3	0.000200532	0.0266647	24	16	0.961665
TC1400001609.mm.2	Tmem254c; Tmem254a	0.000200532	0.0266647	24	20	0.268701
TC1400001783.mm.2	Tspan14	0.000200532	0.0266647	24	0	0.309359
TC1800000468.mm.2	Kcnn2	0.000200532	0.0266647	24	12	0.424264
TC1800000535.mm.2	Snx24	0.000200532	0.0266647	24	6	0.403051
TC0300001531.mm.2	Zzz3	0.000234737	0.0280245	24	10	0.512652
TC0400000993.mm.2	Angptl3	0.000234737	0.0280245	24	20	0.0989949
TC0400001975.mm.2	Rere	0.000234737	0.0280245	24	8	0.296985
TC0400003369.mm.2	Rnf220	0.000234737	0.0280245	24	4	0.33234
TC0500000676.mm.2	Slain2	0.000234737	0.0280245	24	14	0.205061
TC0500002218.mm.2	Fam53a	0.000234737	0.0280245	24	12	0.381838
TC0500003238.mm.2	Clip1	0.000234737	0.0280245	24	10	0.410122
TC0500003249.mm.2	Pitpnm2	0.000234737	0.0280245	24	12	0.62579
TC0600000841.mm.2	St3gal5	0.000234737	0.0280245	24	14	0.853831
TC0800000974.mm.2	Prdx2	0.000234737	0.0280245	24	16	0.19799
TC0900000497.mm.2	Usp2	0.000234737	0.0280245	24	14	2.68701
TC0900003276.mm.2	Cyp8b1	0.000234737	0.0280245	24	2	0.738927
TC1000000518.mm.2	Ccdc138	0.000234737	0.0280245	24	22	0.555079
TC1100000954.mm.2	Gltpd2	0.000234737	0.0280245	24	20	0.275772
TC1100004002.mm.2	Abca6	0.000234737	0.0280245	24	10	0.502046
TC1300002553.mm.2	Pik3r1	0.000234737	0.0280245	24	16	0.636396
TC1700000182.mm.2	Fam120b	0.000234737	0.0280245	24	16	0.408354
TC1800000332.mm.2	Ankhd1; Eif4ebp3	0.000234737	0.0280245	24	14	0.270468
TC1800001237.mm.2	Fgf1	0.000234737	0.0280245	24	18	0.965201
TC0100000164.mm.2	Col9a1	0.000268942	0.0301622	24	2	0.268701
TC0200000612.mm.2	Mapkap1	0.000268942	0.0301622	24	4	0.254558
TC0200003698.mm.2	Abcb11	0.000268942	0.0301622	24	4	0.463155
TC0300002633.mm.2	Dclre1b	0.000268942	0.0301622	24	14	0.385373
TC0400001856.mm.2	Dhrs3	0.000268942	0.0301622	24	2	0.510885
TC0500002699.mm.2	Sult1d1	0.000268942	0.0301622	24	16	0.279307
TC0600001308.mm.2	8430408G22Rik	0.000268942	0.0301622	24	6	1.44603
TC1100001077.mm.2	Myo1c	0.000268942	0.0301622	24	14	0.342947
TC1300001779.mm.2	Tubb2a	0.000268942	0.0301622	24	0	1.41421
TC1500001090.mm.2	Soat2	0.000268942	0.0301622	24	8	0.606344
TC1700001062.mm.2	Man2a1	0.000268942	0.0301622	24	14	0.374767
TC1700001711.mm.2	Cuta	0.000268942	0.0301622	24	18	0.410122
TC0100003857.mm.2	Cr2	0.000313568	0.0323865	24	10	0.440174
TC0100003893.mm.2	Ahctf1	0.000313568	0.0323865	24	16	0.433103
TC0200002783.mm.2	Osbpl2	0.000313568	0.0323865	24	16	0.254558
TC0300000322.mm.2	Jade1	0.000313568	0.0323865	24	10	0.703571
TC0400001259.mm.2	Prdx1	0.000313568	0.0323865	24	8	0.116673
TC0700002876.mm.2	Ccne1	0.000313568	0.0323865	24	12	0.533866
TC1000000015.mm.2	Mthfd1l	0.000313568	0.0323865	24	14	0.548008
TC1000000502.mm.2	Hsf2	0.000313568	0.0323865	24	8	0.397748
TC1000002695.mm.2	Amdhd1	0.000313568	0.0323865	24	4	0.66468
TC1100001109.mm.2	Blmh	0.000313568	0.0323865	24	6	0.226274
TC1100004265.mm.2	Igtp	0.000313568	0.0323865	24	22	0.754836
TC1300000626.mm.2	Simc1	0.000313568	0.0323865	24	14	0.516188
TC1400002310.mm.2	Slc25a37	0.000313568	0.0323865	24	10	0.337643
TC1600001092.mm.2	Mx2	0.000313568	0.0323865	24	22	0.873277
TC1600002167.mm.2	Cluap1	0.000313568	0.0323865	24	18	0.265165
TC1900000235.mm.2	Patl1	0.000313568	0.0323865	24	12	0.282843
TC1900001722.mm.2	Gfra1	0.000313568	0.0323865	24	16	0.403051
TC0100001381.mm.2	Rgs16	0.000358195	0.0338472	24	10	2.55266
TC0100002025.mm.2	Gm2710; Gm10075	0.000358195	0.0338472	24	12	0.233345
TC0200001226.mm.2	Slc43a3	0.000358195	0.0338472	24	16	0.325269
TC0700000513.mm.2	Hnrnpl	0.000358195	0.0338472	24	8	0.46669
TC0700001005.mm.2	Ttc23	0.000358195	0.0338472	24	20	0.68059
TC0900001017.mm.2	Gm7972	0.000358195	0.0338472	24	6	0.403051
TC0X00000319.mm.2	Lonrf3	0.000358195	0.0338472	24	22	0.604576
TC1000001063.mm.2	Pah	0.000358195	0.0338472	24	8	0.152028
TC1000001506.mm.2	Avpr1a	0.000358195	0.0338472	24	2	0.997021
TC1000001555.mm.2	Dctn2	0.000358195	0.0338472	24	8	0.325269
TC1100000038.mm.2	Tbc1d10a	0.000358195	0.0338472	24	12	0.502046
TC1100000934.mm.2	Gabarap	0.000358195	0.0338472	24	16	0.219203
TC1300000050.mm.2	Larp4b	0.000358195	0.0338472	24	12	0.222739
TC1300000735.mm.2	Dapk1	0.000358195	0.0338472	24	2	0.597505
TC1400001314.mm.2	Ipo5	0.000358195	0.0338472	24	16	0.406586
TC1400001613.mm.2	Tmem254b; Tmem254c; Tmem254a	0.000358195	0.0338472	24	20	0.268701
TC1500002075.mm.2	Abcd2	0.000358195	0.0338472	24	10	0.869741
TC1600000564.mm.2	Igsf11	0.000358195	0.0338472	24	6	0.33234
TC1700000356.mm.2	Spsb3	0.000358195	0.0338472	24	0	0.403051
TC1700001757.mm.2	Fkbp5	0.000358195	0.0338472	24	14	1.20738
TC0300000444.mm.2	Rnf13	0.000416037	0.037555	24	8	0.120208
TC0300001076.mm.2	Slc16a1	0.000416037	0.037555	24	0	0.417193
TC0300001576.mm.2	Zranb2	0.000416037	0.037555	24	16	0.215668
TC0500000263.mm.2	Rbm33	0.000416037	0.037555	24	8	0.311127
TC0600003364.mm.2	Slco1a4	0.000416037	0.037555	24	12	0.723017
TC0700000825.mm.2	Irf3	0.000416037	0.037555	24	16	0.205061
TC1000001905.mm.2	Smlr1	0.000416037	0.037555	24	10	0.441942
TC1100000989.mm.2	Xaf1	0.000416037	0.037555	24	0	0.799031
TC1100003224.mm.2	Serpinf2	0.000416037	0.037555	24	6	0.233345
TC1400001605.mm.2	Tmem254c; Tmem254a	0.000416037	0.037555	24	20	0.289914
TC1500000263.mm.2	Spag1	0.000416037	0.037555	24	18	0.420729
TC0100002645.mm.2	Serpine2	0.000473879	0.040164	24	20	0.417193
TC0100003279.mm.2	Dhx9	0.000473879	0.040164	24	10	0.424264
TC0400001017.mm.2	Ube2u	0.000473879	0.040164	24	0	0.569221
TC0400001612.mm.2	Nr0b2	0.000473879	0.040164	24	4	1.18794
TC0400002854.mm.2	Tle1	0.000473879	0.040164	24	8	0.572756
TC0600000718.mm.2	Tigd2	0.000473879	0.040164	24	8	0.351786
TC0700001715.mm.2	Acsm3	0.000473879	0.040164	24	16	0.318198
TC0900000876.mm.2	Rps27l	0.000473879	0.040164	24	20	0.36416
TC0900002070.mm.2	Olfr937	0.000473879	0.040164	24	20	0.449013
TC1100001345.mm.2	Mtmr4	0.000473879	0.040164	24	20	0.365928
TC1100001550.mm.2	Lasp1	0.000473879	0.040164	24	2	0.563918
TC1200000225.mm.2	Cmpk2	0.000473879	0.040164	24	0	0.95813
TC1300002269.mm.2	Mtrr	0.000473879	0.040164	24	18	0.487904
TC1300002463.mm.2	Iqgap2	0.000473879	0.040164	24	14	0.183848
TC1400001032.mm.2	Lpar6	0.000473879	0.040164	24	22	0.30052
TC1700001265.mm.2	Abcg8	0.000473879	0.040164	24	8	0.936916
TC0100001123.mm.2	Acmsd	0.000548371	0.0431813	24	22	0.66468
TC0200000798.mm.2	Epc2	0.000548371	0.0431813	24	8	0.449013
TC0200001266.mm.2	Olfr1034	0.000548371	0.0431813	24	20	0.654074
TC0200002683.mm.2	Pck1	0.000548371	0.0431813	24	10	1.15612
TC0300002166.mm.2	Serpini2	0.000548371	0.0431813	24	2	0.311127
TC0300002237.mm.2	D930015E06Rik	0.000548371	0.0431813	24	10	0.565685
TC0500000877.mm.2	Stbd1	0.000548371	0.0431813	24	14	0.749533
TC0600001448.mm.2	Nop2	0.000548371	0.0431813	24	16	0.572756
TC0800001654.mm.2	Efnb2	0.000548371	0.0431813	24	16	0.406586
TC0900001442.mm.2	Cdc25a	0.000548371	0.0431813	24	14	0.477297
TC0900001459.mm.2	Scap	0.000548371	0.0431813	24	8	0.519723
TC1000000299.mm.2	Tspyl4	0.000548371	0.0431813	24	0	0.445477
TC1000000873.mm.2	Oaz1; Oaz1-ps; Mir1982	0.000548371	0.0431813	24	8	0.176777
TC1000002420.mm.2	Adarb1	0.000548371	0.0431813	24	14	0.397748
TC1000003220.mm.2	Nt5dc3	0.000548371	0.0431813	24	16	0.357089
TC1100000187.mm.2	Spred2	0.000548371	0.0431813	24	8	0.429567
TC1100002324.mm.2	Ugp2	0.000548371	0.0431813	24	10	0.268701
TC1100002728.mm.2	Leap2	0.000548371	0.0431813	24	0	0.928078
TC1500002310.mm.2	Smug1	0.000548371	0.0431813	24	16	0.279307
TC1800000301.mm.2	Egr1	0.000548371	0.0431813	24	4	1.4425
TC0200001627.mm.2	Lgr4	0.000622863	0.0453485	24	6	0.424264
TC0200002012.mm.2	Mavs	0.000622863	0.0453485	24	20	0.523259
TC0200003873.mm.2	Tmx2	0.000622863	0.0453485	24	22	0.321734
TC0300000453.mm.2	Tsc22d2	0.000622863	0.0453485	24	10	0.558614
TC0400000354.mm.2	Nfx1	0.000622863	0.0453485	24	6	0.567453
TC0400003255.mm.2	Btf3l4	0.000622863	0.0453485	24	8	0.159099
TC0500001584.mm.2	Por	0.000622863	0.0453485	24	12	1.00056
TC0500001590.mm.2	Hspb1	0.000622863	0.0453485	24	20	1.05712
TC0600000849.mm.2	Tmem150a	0.000622863	0.0453485	24	20	0.756604
TC0600001890.mm.2	Tfec	0.000622863	0.0453485	24	18	0.378302
TC0800001867.mm.2	Slc25a15	0.000622863	0.0453485	24	0	0.208597
TC1000002894.mm.2	Tbc1d15	0.000622863	0.0453485	24	8	0.558614
TC1000003153.mm.2	Erbb3	0.000622863	0.0453485	24	6	0.647003
TC1100001206.mm.2	Psmd11	0.000622863	0.0453485	24	6	0.417193
TC1100002233.mm.2	Cobl	0.000622863	0.0453485	24	8	0.321734
TC1100003779.mm.2	Dhx58	0.000622863	0.0453485	24	22	0.694732
TC1100004092.mm.2	Caskin2	0.000622863	0.0453485	24	20	0.394212
TC1600000214.mm.2	Serpind1	0.000622863	0.0453485	24	10	0.178544
TC1600000659.mm.2	Nepro	0.000622863	0.0453485	24	14	0.473762
TC1700000474.mm.2	Ppard; 1810013A23Rik	0.000622863	0.0453485	24	22	0.890955
TC1700000513.mm.2	Zfand3	0.000622863	0.0453485	24	8	0.275772
TC1700000882.mm.2	Xpo5	0.000622863	0.0453485	24	14	0.289914
TC1700001138.mm.2	Wdr43	0.000622863	0.0453485	24	16	0.365928
TC0100001999.mm.2	Stau2	0.000718206	0.0481827	24	8	0.424264
TC0100002210.mm.2	Mitd1	0.000718206	0.0481827	24	22	0.309359
TC0200002753.mm.2	Gm14327	0.000718206	0.0481827	24	16	0.353553
TC0200003098.mm.2	Abi1	0.000718206	0.0481827	24	12	0.372999
TC0200005342.mm.2	Gm14440; Gm14288	0.000718206	0.0481827	24	16	0.268701
TC0300000640.mm.2	Fgg	0.000718206	0.0481827	24	6	0.127279
TC0300002598.mm.2	Cd2	0.000718206	0.0481827	24	6	0.486136
TC0400001574.mm.2	Tmem200b	0.000718206	0.0481827	24	16	0.360624
TC0500002770.mm.2	Ccni	0.000718206	0.0481827	24	6	0.263397
TC0500003728.mm.2	D5Ertd579e	0.000718206	0.0481827	24	16	0.438406
TC0700001673.mm.2	Insc	0.000718206	0.0481827	24	22	0.268701
TC0700004589.mm.2	Cars	0.000718206	0.0481827	24	8	0.473762
TC0800000403.mm.2	Saraf	0.000718206	0.0481827	24	20	0.397748
TC0800002844.mm.2	Slc12a4	0.000718206	0.0481827	24	14	0.404819
TC0900003066.mm.2	Arih2	0.000718206	0.0481827	24	12	0.350018
TC1000001145.mm.2	Fgd6	0.000718206	0.0481827	24	12	0.418961
TC1100000531.mm.2	Rnf130	0.000718206	0.0481827	24	8	0.282843
TC1100003314.mm.2	Lgals9	0.000718206	0.0481827	24	4	0.304056
TC1100003462.mm.2	Ypel2	0.000718206	0.0481827	24	2	0.922774
TC1200001663.mm.2	Ifrd1	0.000718206	0.0481827	24	12	0.989949
TC1200001768.mm.2	Nfkbia	0.000718206	0.0481827	24	12	0.770746
TC1200001990.mm.2	Actn1	0.000718206	0.0481827	24	14	0.381838
TC1300001794.mm.2	Eci2	0.000718206	0.0481827	24	12	0.616951
TC1400002050.mm.2	Dad1	0.000718206	0.0481827	24	20	0.173241
TC1500001585.mm.2	Mtss1	0.000718206	0.0481827	24	14	0.807869
TC1700000639.mm.2	Agpat1	0.000718206	0.0481827	24	18	0.282843
TC0100001610.mm.2	Igsf8	0.000813548	0.0511775	24	14	0.388909
TC0200004543.mm.2	Trpm7	0.000813548	0.0511775	24	10	0.381838
TC0300002401.mm.2	Lce1a1	0.000813548	0.0511775	24	6	0.388909
TC0400001677.mm.2	Id3	0.000813548	0.0511775	24	20	1.2834
TC0400002549.mm.2	Gne	0.000813548	0.0511775	24	10	0.631093
TC0500001408.mm.2	Tmem120b	0.000813548	0.0511775	24	18	0.516188
TC0500002628.mm.2	Clock	0.000813548	0.0511775	24	0	0.459619
TC0700002994.mm.2	Aldh16a1	0.000813548	0.0511775	24	6	0.190919
TC0900001173.mm.2	Plscr4	0.000813548	0.0511775	24	14	0.4278
TC1000000175.mm.2	H60b; Raet1a; Raet1b; Raet1c; Raet1d; Raet1e	0.000813548	0.0511775	24	8	0.717713
TC1000001639.mm.2	Olfr782	0.000813548	0.0511775	24	20	0.263397
TC1000003044.mm.2	Tbc1d30	0.000813548	0.0511775	24	8	0.553311
TC1100000789.mm.2	Specc1	0.000813548	0.0511775	24	16	0.296985
TC1200000788.mm.2	Rbm25	0.000813548	0.0511775	24	14	0.46669
TC1300000016.mm.2	Akr1c14	0.000813548	0.0511775	24	14	0.449013
TC1400000326.mm.2	Bap1	0.000813548	0.0511775	24	8	0.183848
TC1400001554.mm.2	Ap3m1	0.000813548	0.0511775	24	12	0.459619
TC1500002183.mm.2	Rnd1	0.000813548	0.0511775	24	0	0.533866
TC1600002094.mm.2	Rcan1	0.000813548	0.0511775	24	16	0.814941
TC1700002588.mm.2	Map4k3	0.000813548	0.0511775	24	8	0.282843
TC1700002692.mm.2	Calm2	0.000813548	0.0511775	24	6	0.141421
TC1800000994.mm.2	Npc1	0.000813548	0.0511775	24	10	0.72832
TC0100000014.mm.2	Atp6v1h	0.000934844	0.0552105	24	8	0.215668
TC0100002775.mm.2	Glrp1	0.000934844	0.0552105	24	4	0.212132
TC0100003725.mm.2	Mia3	0.000934844	0.0552105	24	12	0.282843
TC0200004251.mm.2	Prrg4	0.000934844	0.0552105	24	14	0.945755
TC0300000878.mm.2	Pogz	0.000934844	0.0552105	24	14	0.275772
TC0400001386.mm.2	Mycl	0.000934844	0.0552105	24	6	0.256326
TC0400002479.mm.2	Sigmar1	0.000934844	0.0552105	24	2	0.459619
TC0400003537.mm.2	Ago3	0.000934844	0.0552105	24	16	0.4278
TC0500000896.mm.2	Ccng2	0.000934844	0.0552105	24	4	0.922774
TC0500002882.mm.2	Hsd17b11	0.000934844	0.0552105	24	14	0.452548
TC0700001669.mm.2	Pde3b	0.000934844	0.0552105	24	12	0.374767
TC0700002635.mm.2	Ceacam1	0.000934844	0.0552105	24	4	0.374767
TC0900000509.mm.2	Slc37a4	0.000934844	0.0552105	24	18	0.701803
TC1000000372.mm.2	Sesn1	0.000934844	0.0552105	24	8	0.289914
TC1000002900.mm.2	Tmem19	0.000934844	0.0552105	24	22	0.311127
TC1000002920.mm.2	Cct2	0.000934844	0.0552105	24	16	0.155563
TC1100003058.mm.2	Senp3	0.000934844	0.0552105	24	10	0.205061
TC1300001645.mm.2	Hist1h4a	0.000934844	0.0552105	24	16	0.208597
TC1300002588.mm.2	Erbb2ip	0.000934844	0.0552105	24	10	0.551543
TC1600001805.mm.2	Crybg3	0.000934844	0.0552105	24	20	0.424264
TC1900000705.mm.2	Sfxn2	0.000934844	0.0552105	24	18	0.491439
TC1900000763.mm.2	Pdcd4	0.000934844	0.0552105	24	6	0.39598
TC1900001119.mm.2	Ms4a10	0.000934844	0.0552105	24	12	0.307591
TC0100000708.mm.2	Mff	0.00105614	0.057482	24	10	0.318198
TC0100000711.mm.2	Agfg1	0.00105614	0.057482	24	8	0.176777
TC0100003042.mm.2	Pfkfb2; C4bp-ps1	0.00105614	0.057482	24	14	0.33234
TC0100003402.mm.2	Fmo2	0.00105614	0.057482	24	16	0.735391
TC0100003664.mm.2	Psen2	0.00105614	0.057482	24	0	0.795495
TC0200002719.mm.2	Gm14288; Gm14440	0.00105614	0.057482	24	18	0.282843
TC0200002737.mm.2	Gm14288; Gm14435	0.00105614	0.057482	24	18	0.282843
TC0200004965.mm.2	Gss	0.00105614	0.057482	24	12	0.86267
TC0200005364.mm.2	Gm14412	0.00105614	0.057482	24	18	0.293449
TC0200005489.mm.2	Gm14306	0.00105614	0.057482	24	16	0.266933
TC0200005516.mm.2	Tmem189	0.00105614	0.057482	24	18	0.54624
TC0300000948.mm.2	Hfe2	0.00105614	0.057482	24	2	0.372999
TC0400000212.mm.2	Ndufaf4	0.00105614	0.057482	24	20	0.512652
TC0500003261.mm.2	Eif2b1	0.00105614	0.057482	24	16	0.272236
TC0700000388.mm.2	Ethe1	0.00105614	0.057482	24	2	0.717713
TC0700000445.mm.2	Cyp2a5; Cyp2a4	0.00105614	0.057482	24	12	0.445477
TC0700001640.mm.2	Usp47	0.00105614	0.057482	24	10	0.183848
TC0700003790.mm.2	Uvrag	0.00105614	0.057482	24	12	0.406586
TC0900001398.mm.2	Nicn1	0.00105614	0.057482	24	22	0.33234
TC0X00002158.mm.2	Zdhhc9	0.00105614	0.057482	24	8	0.339411
TC1000001024.mm.2	Rfx4	0.00105614	0.057482	24	0	0.795495
TC1100001095.mm.2	Fam57a	0.00105614	0.057482	24	20	0.509117
TC1100001165.mm.2	Ift20	0.00105614	0.057482	24	18	0.304056
TC1100001886.mm.2	Slc9a3r1	0.00105614	0.057482	24	18	0.236881
TC1100003409.mm.2	Gm11437	0.00105614	0.057482	24	22	0.95813
TC1200001916.mm.2	Trmt5	0.00105614	0.057482	24	22	0.304056
TC1200002296.mm.2	Clmn	0.00105614	0.057482	24	10	0.675287
TC1300002594.mm.2	Nln	0.00105614	0.057482	24	8	0.353553
TC1400001930.mm.2	Gch1	0.00105614	0.057482	24	8	0.601041
TC1700001178.mm.2	Crim1	0.00105614	0.057482	24	12	0.387141
TC1700002287.mm.2	Sult1c2	0.00105614	0.057482	24	8	0.526795
TC1800001043.mm.2	Dsc2	0.00105614	0.057482	24	8	0.682358
TC0100002864.mm.2	Ppip5k2	0.00120955	0.0621743	24	14	0.254558
TC0200000781.mm.2	Acvr2a	0.00120955	0.0621743	24	10	0.212132
TC0200001091.mm.2	Hoxd13	0.00120955	0.0621743	24	0	0.162635
TC0200005438.mm.2	Helz2	0.00120955	0.0621743	24	22	0.399515
TC0400004221.mm.2	AU022252	0.00120955	0.0621743	24	0	0.254558
TC0500000177.mm.2	Psmc2	0.00120955	0.0621743	24	6	0.321734
TC0500001615.mm.2	Plod3; Mir702	0.00120955	0.0621743	24	16	0.357089
TC0500003576.mm.2	Baiap2l1	0.00120955	0.0621743	24	14	0.650538
TC0600000655.mm.2	Plekha8	0.00120955	0.0621743	24	16	0.385373
TC0600003145.mm.2	Ltbr	0.00120955	0.0621743	24	10	0.431335
TC0700000451.mm.2	BC024978	0.00120955	0.0621743	24	14	0.22981
TC0700002628.mm.2	Erf	0.00120955	0.0621743	24	12	0.282843
TC0700003778.mm.2	Tsku	0.00120955	0.0621743	24	14	0.933381
TC0800002339.mm.2	Psd3	0.00120955	0.0621743	24	10	0.254558
TC0800002402.mm.2	Mpv17l2	0.00120955	0.0621743	24	20	0.502046
TC1000000171.mm.2	Sgk1	0.00120955	0.0621743	24	12	0.645235
TC1100000032.mm.2	Sec14l4	0.00120955	0.0621743	24	18	0.441942
TC1100003667.mm.2	Fbxl20	0.00120955	0.0621743	24	8	0.661145
TC1200000865.mm.2	Cipc	0.00120955	0.0621743	24	16	0.431335
TC1300001028.mm.2	Acot12	0.00120955	0.0621743	24	8	0.473762
TC1300001479.mm.2	Mrpl32	0.00120955	0.0621743	24	16	0.265165
TC1300002201.mm.2	Aaed1	0.00120955	0.0621743	24	8	0.397748
TC1500002142.mm.2	Slc38a2	0.00120955	0.0621743	24	10	0.740694
TC1700001621.mm.2	1600002H07Rik	0.00120955	0.0621743	24	16	0.707107
TC0100002739.mm.2	Ncl	0.00136296	0.0657956	24	14	0.254558
TC0200002359.mm.2	Itch	0.00136296	0.0657956	24	10	0.208597
TC0200002748.mm.2	Gm14420	0.00136296	0.0657956	24	18	0.30052
TC0200005114.mm.2	Sdc4	0.00136296	0.0657956	24	6	0.509117
TC0200005518.mm.2	Zfp512b	0.00136296	0.0657956	24	10	0.470226
TC0300002311.mm.2	Slc25a44	0.00136296	0.0657956	24	20	0.650538
TC0400000085.mm.2	Ccne2	0.00136296	0.0657956	24	14	0.505581
TC0400004035.mm.2	Kif1b	0.00136296	0.0657956	24	8	0.342947
TC0500001302.mm.2	Fbxo21	0.00136296	0.0657956	24	10	1.01823
TC0500003660.mm.2	Hsph1	0.00136296	0.0657956	24	20	1.27986
TC0600000091.mm.2	Tmem106b	0.00136296	0.0657956	24	10	0.33234
TC0600002491.mm.2	Mat2a	0.00136296	0.0657956	24	16	0.311127
TC0700000904.mm.2	Prmt3	0.00136296	0.0657956	24	14	0.440174
TC0700003448.mm.2	Lrrc28	0.00136296	0.0657956	24	18	0.512652
TC0700003804.mm.2	Slco2b1	0.00136296	0.0657956	24	22	0.420729
TC0800002593.mm.2	Calr	0.00136296	0.0657956	24	0	0.22981
TC0900000194.mm.2	Ilf3	0.00136296	0.0657956	24	16	0.417193
TC1000000531.mm.2	P4ha1	0.00136296	0.0657956	24	16	0.390676
TC1000001044.mm.2	Timp3	0.00136296	0.0657956	24	14	0.601041
TC1000002436.mm.2	Lrrc3	0.00136296	0.0657956	24	18	0.823779
TC1100000440.mm.2	Rnf145	0.00136296	0.0657956	24	14	0.494975
TC1100002003.mm.2	Rnf213	0.00136296	0.0657956	24	22	0.700036
TC1400002023.mm.2	Hnrnpc	0.00136296	0.0657956	24	20	0.325269
TC1500001424.mm.2	Slc25a32	0.00136296	0.0657956	24	14	0.254558
TC1600001385.mm.2	Tbccd1	0.00136296	0.0657956	24	18	0.307591
TC1700001268.mm.2	Slc3a1	0.00136296	0.0657956	24	0	0.4278
TC1700002199.mm.2	Ubr2	0.00136296	0.0657956	24	12	0.289914
TC1900001203.mm.2	Psat1	0.00136296	0.0657956	24	18	0.657609
TC0100001498.mm.2	F5	0.0015559	0.0721299	24	12	0.16617
TC0200001049.mm.2	Rapgef4	0.0015559	0.0721299	24	10	0.737159
TC0400002743.mm.2	AI314180	0.0015559	0.0721299	24	8	0.258094
TC0600002056.mm.2	Wdr91	0.0015559	0.0721299	24	2	0.841457
TC0700003764.mm.2	Thrsp	0.0015559	0.0721299	24	20	0.583363
TC0800001116.mm.2	Arl2bp	0.0015559	0.0721299	24	6	0.311127
TC0X00002985.mm.2	Sytl4	0.0015559	0.0721299	24	6	0.226274
TC1100003817.mm.2	Dusp3	0.0015559	0.0721299	24	14	0.304056
TC1200001314.mm.2	Rapgef5	0.0015559	0.0721299	24	14	0.334108
TC1300000671.mm.2	Ddx46	0.0015559	0.0721299	24	10	0.512652
TC1300001140.mm.2	Ccdc125	0.0015559	0.0721299	24	8	0.357089
TC1300002436.mm.2	Bhmt	0.0015559	0.0721299	24	2	0.647003
TC1500000588.mm.2	Maf1	0.0015559	0.0721299	24	6	0.49851
TC1700000836.mm.2	Cyp39a1	0.0015559	0.0721299	24	18	0.424264
TC1700001991.mm.2	Prr3	0.0015559	0.0721299	24	12	0.424264
TC1800000794.mm.2	Acaa2	0.0015559	0.0721299	24	18	0.18208
TC1900000162.mm.2	Ubxn1	0.0015559	0.0721299	24	6	0.381838
TC1900000549.mm.2	Slc35g1	0.0015559	0.0721299	24	12	0.56215
TC1900000693.mm.2	Tmem180	0.0015559	0.0721299	24	22	0.424264
TC0100001180.mm.2	Slc45a3	0.00174883	0.0757006	24	22	0.470226
TC0100001703.mm.2	Cdc42bpa	0.00174883	0.0757006	24	10	0.413657
TC0100003323.mm.2	Ralgps2	0.00174883	0.0757006	24	8	0.4278
TC0200001940.mm.2	Zc3h6	0.00174883	0.0757006	24	10	0.639932
TC0300000376.mm.2	Foxo1	0.00174883	0.0757006	24	12	0.620486
TC0300002802.mm.2	Vcam1	0.00174883	0.0757006	24	16	0.551543
TC0400000442.mm.2	Rgp1	0.00174883	0.0757006	24	14	0.289914
TC0400001107.mm.2	Dhcr24	0.00174883	0.0757006	24	14	0.212132
TC0400002104.mm.2	Tnfrsf18	0.00174883	0.0757006	24	4	0.350018
TC0400003079.mm.2	Jun	0.00174883	0.0757006	24	14	0.452548
TC0500000096.mm.2	Pclo	0.00174883	0.0757006	24	22	0.463155
TC0500000488.mm.2	Lap3	0.00174883	0.0757006	24	20	0.404819
TC0600000416.mm.2	Mgam	0.00174883	0.0757006	24	8	0.233345
TC0600003439.mm.2	Asun	0.00174883	0.0757006	24	8	0.410122
TC0700001430.mm.2	Stard10	0.00174883	0.0757006	24	16	0.173241
TC0700004051.mm.2	Olfr487	0.00174883	0.0757006	24	0	0.318198
TC0700004277.mm.2	Cd19	0.00174883	0.0757006	24	8	0.441942
TC0800000146.mm.2	Cln8	0.00174883	0.0757006	24	14	0.420729
TC0800001207.mm.2	D230025D16Rik	0.00174883	0.0757006	24	8	0.749533
TC0900002712.mm.2	Fbxo9	0.00174883	0.0757006	24	8	0.243952
TC0X00000706.mm.2	Taz	0.00174883	0.0757006	24	2	0.295217
TC0X00001653.mm.2	Ctps2	0.00174883	0.0757006	24	8	0.470226
TC0X00002470.mm.2	Mpp1	0.00174883	0.0757006	24	14	0.251023
TC0X00003399.mm.2	Sh3bgrl	0.00174883	0.0757006	24	12	0.240416
TC1000000215.mm.2	Ctgf	0.00174883	0.0757006	24	14	0.381838
TC1000002794.mm.2	Tmtc2	0.00174883	0.0757006	24	10	0.532098
TC1100000794.mm.2	Ttc19	0.00174883	0.0757006	24	16	0.33234
TC1200001237.mm.2	Tnfaip2	0.00174883	0.0757006	24	2	0.652306
TC1300001419.mm.2	Gtpbp4	0.00174883	0.0757006	24	14	0.371231
TC1400000578.mm.2	Ang; Rnase4	0.00174883	0.0757006	24	10	0.622254
TC1500000632.mm.2	Apol9b	0.00174883	0.0757006	24	0	0.691197
TC1700001693.mm.2	Fam234a	0.00174883	0.0757006	24	14	0.222739
TC1900000140.mm.2	Atl3	0.00174883	0.0757006	24	8	0.312895
TC1900001506.mm.2	Pik3ap1	0.00174883	0.0757006	24	8	0.392444
TC0100001202.mm.2	Ppp1r15b	0.00199011	0.0815358	24	18	0.367696
TC0100002319.mm.2	Nab1	0.00199011	0.0815358	24	10	0.296985
TC0200001053.mm.2	Zak	0.00199011	0.0815358	24	14	0.318198
TC0300000711.mm.2	Nes	0.00199011	0.0815358	24	8	0.272236
TC0300002489.mm.2	Ciart	0.00199011	0.0815358	24	12	2.36174
TC0400000168.mm.2	Ttpa	0.00199011	0.0815358	24	10	0.247487
TC0400000341.mm.2	Aco1	0.00199011	0.0815358	24	18	0.339411
TC0400003349.mm.2	Mmachc	0.00199011	0.0815358	24	20	0.275772
TC0400003747.mm.2	Tmem57	0.00199011	0.0815358	24	16	0.30052
TC0500002919.mm.2	Tgfbr3	0.00199011	0.0815358	24	12	0.413657
TC0500003243.mm.2	Hcar2	0.00199011	0.0815358	24	18	0.353553
TC0500003254.mm.2	Sbno1	0.00199011	0.0815358	24	12	0.252791
TC0700000014.mm.2	Ndufa3	0.00199011	0.0815358	24	20	0.390676
TC0700002924.mm.2	Zfp141	0.00199011	0.0815358	24	16	0.217435
TC0800002558.mm.2	Adgre5; Mir1668	0.00199011	0.0815358	24	16	0.399515
TC0X00000064.mm.2	Wdr45	0.00199011	0.0815358	24	10	0.599273
TC1200000682.mm.2	Plekhg3	0.00199011	0.0815358	24	10	0.413657
TC1300001242.mm.2	Plk2	0.00199011	0.0815358	24	16	0.298753
TC1300001298.mm.2	Arl15	0.00199011	0.0815358	24	16	0.438406
TC1500001013.mm.2	Tmbim6	0.00199011	0.0815358	24	12	0.169706
TC1500001102.mm.2	Pcbp2	0.00199011	0.0815358	24	10	0.327037
TC1500001584.mm.2	Tatdn1	0.00199011	0.0815358	24	0	0.159099
TC1500002109.mm.2	Adamts20	0.00199011	0.0815358	24	8	0.431335
TC1600000346.mm.2	Rtp4	0.00199011	0.0815358	24	22	0.790192
TC1600001607.mm.2	Poglut1	0.00199011	0.0815358	24	20	0.194454
TC1700000604.mm.2	Vps52	0.00199011	0.0815358	24	22	0.26163
TC1800000816.mm.2	Smad2	0.00199011	0.0815358	24	14	0.222739
TC1800000944.mm.2	Arhgap12	0.00199011	0.0815358	24	8	0.240416
TC1900000320.mm.2	Nmrk1	0.00199011	0.0815358	24	16	0.632861
TC0100000456.mm.2	Nop58	0.0022314	0.0858759	24	16	0.441942
TC0100002544.mm.2	Fn1	0.0022314	0.0858759	24	6	0.190919
TC0100003477.mm.2	Uck2	0.0022314	0.0858759	24	16	0.413657
TC0100003603.mm.2	Grem2	0.0022314	0.0858759	24	10	0.654074
TC0100003662.mm.2	Adck3	0.0022314	0.0858759	24	2	1.33466
TC0300001038.mm.2	Sike1	0.0022314	0.0858759	24	18	0.282843
TC0400002434.mm.2	Ddx58	0.0022314	0.0858759	24	22	0.517956
TC0500000689.mm.2	Dcun1d4	0.0022314	0.0858759	24	10	0.441942
TC0500002231.mm.2	Mxd4	0.0022314	0.0858759	24	8	0.208597
TC0600001126.mm.2	Fam19a1	0.0022314	0.0858759	24	4	0.371231
TC0600002690.mm.2	Mcm2	0.0022314	0.0858759	24	16	0.302288
TC0700002781.mm.2	Hamp2	0.0022314	0.0858759	24	18	0.318198
TC0700003798.mm.2	Rps3; Snord15b	0.0022314	0.0858759	24	18	0.219203
TC0800002060.mm.2	Lonrf1	0.0022314	0.0858759	24	16	0.551543
TC0800002389.mm.2	Ddx49	0.0022314	0.0858759	24	16	0.190919
TC0900000637.mm.2	Exph5	0.0022314	0.0858759	24	20	0.36416
TC0900002719.mm.2	Gsta2	0.0022314	0.0858759	24	10	0.799031
TC0900003002.mm.2	Glyctk	0.0022314	0.0858759	24	20	0.629325
TC0X00000096.mm.2	B630019K06Rik	0.0022314	0.0858759	24	8	0.325269
TC1000001894.mm.2	Enpp1	0.0022314	0.0858759	24	12	0.335876
TC1000003056.mm.2	Tmem5; Gm9079	0.0022314	0.0858759	24	8	0.282843
TC1100000801.mm.2	Ubb; Gm1821	0.0022314	0.0858759	24	8	0.169706
TC1100001359.mm.2	Srsf1	0.0022314	0.0858759	24	20	0.381838
TC1100001642.mm.2	Tubg1	0.0022314	0.0858759	24	18	0.516188
TC1100002998.mm.2	Adprm	0.0022314	0.0858759	24	4	0.385373
TC1300001540.mm.2	Zscan26	0.0022314	0.0858759	24	16	0.215668
TC1400000316.mm.2	Mustn1	0.0022314	0.0858759	24	2	0.636396
TC1400001665.mm.2	Gnl3; Snord19	0.0022314	0.0858759	24	14	0.318198
TC1500000417.mm.2	D15Ertd621e	0.0022314	0.0858759	24	10	0.311127
TC1600000305.mm.2	Map3k13	0.0022314	0.0858759	24	18	0.618718
TC1600000538.mm.2	Lrrc58	0.0022314	0.0858759	24	20	0.215668
TC1600000726.mm.2	Cblb	0.0022314	0.0858759	24	8	0.440174
TC1700000646.mm.2	Dxo	0.0022314	0.0858759	24	12	0.362392
TC1700001132.mm.2	Lpin2	0.0022314	0.0858759	24	10	0.903329
TC1700002052.mm.2	Olfr91	0.0022314	0.0858759	24	0	0.258094
TC0100001955.mm.2	Arfgef1	0.00253153	0.0933807	24	8	0.176777
TC0200000909.mm.2	44262	0.00253153	0.0933807	24	8	0.388909
TC0200003164.mm.2	Tmem141	0.00253153	0.0933807	24	18	0.339411
TC0300002688.mm.2	Cept1	0.00253153	0.0933807	24	8	0.212132
TC0300002797.mm.2	S1pr1	0.00253153	0.0933807	24	22	0.394212
TC0500002692.mm.2	Ugt2b36	0.00253153	0.0933807	24	10	0.162635
TC0700002954.mm.2	Gm10109	0.00253153	0.0933807	24	2	0.360624
TC0800002799.mm.2	Cmtm4	0.00253153	0.0933807	24	14	0.304056
TC0X00002073.mm.2	Rhox8	0.00253153	0.0933807	24	4	0.298753
TC0X00002307.mm.2	Atp11c	0.00253153	0.0933807	24	10	0.189151
TC1000002892.mm.2	Tph2	0.00253153	0.0933807	24	4	0.353553
TC1100000496.mm.2	Ifi47; Olfr56	0.00253153	0.0933807	24	0	0.314663
TC1100002575.mm.2	Adra1b	0.00253153	0.0933807	24	0	0.385373
TC1100002641.mm.2	Irgm1	0.00253153	0.0933807	24	0	0.632861
TC1100003640.mm.2	Kpnb1	0.00253153	0.0933807	24	20	0.4278
TC1200001253.mm.2	Aspg	0.00253153	0.0933807	24	8	0.378302
TC1400002242.mm.2	Hmbox1	0.00253153	0.0933807	24	8	0.187383
TC1400002281.mm.2	Bnip3l	0.00253153	0.0933807	24	12	0.615183
TC1400002641.mm.2	Ednrb	0.00253153	0.0933807	24	18	0.417193
TC1700000566.mm.2	Cyp4f40	0.00253153	0.0933807	24	22	0.212132
TC1700002152.mm.2	Slc29a1	0.00253153	0.0933807	24	20	0.33234
TC1900000065.mm.2	AI837181	0.00253153	0.0933807	24	4	0.494975
TC1900000432.mm.2	Rcl1	0.00253153	0.0933807	24	8	0.39598
TC1900000504.mm.2	Ifit1	0.00253153	0.0933807	24	22	1.02884
TC1900001095.mm.2	Fads2	0.00253153	0.0933807	24	14	0.205061
TC0100002938.mm.2	2900060B14Rik	0.00283167	0.0993364	24	18	0.378302
TC0200002334.mm.2	Bpifa3	0.00283167	0.0993364	24	20	0.240416
TC0200004163.mm.2	Ext2	0.00283167	0.0993364	24	20	0.305824
TC0300000641.mm.2	Fga	0.00283167	0.0993364	24	6	0.233345
TC0400002275.mm.2	Atp6v0d2	0.00283167	0.0993364	24	10	0.767211
TC0400003773.mm.2	Pnrc2	0.00283167	0.0993364	24	0	0.247487
TC0500000876.mm.2	Fam47e	0.00283167	0.0993364	24	18	0.647003
TC0500001340.mm.2	Iqcd	0.00283167	0.0993364	24	4	0.325269
TC0500001512.mm.2	Cct6a; Snora15	0.00283167	0.0993364	24	20	0.403051
TC0500001569.mm.2	Wbscr27	0.00283167	0.0993364	24	8	0.26163
TC0600000438.mm.2	Gm5771	0.00283167	0.0993364	24	18	0.247487
TC0600001744.mm.2	Klhl42	0.00283167	0.0993364	24	18	0.431335
TC0600002024.mm.2	Plxna4	0.00283167	0.0993364	24	14	0.452548
TC0700001399.mm.2	Chrdl2	0.00283167	0.0993364	24	18	0.505581
TC0900002123.mm.2	Arhgef12	0.00283167	0.0993364	24	10	0.403051
TC0900002332.mm.2	Nrg4	0.00283167	0.0993364	24	14	1.29047
TC0900003004.mm.2	Alas1	0.00283167	0.0993364	24	14	1.43189
TC0900003093.mm.2	Fbxw18	0.00283167	0.0993364	24	4	0.325269
TC0900003119.mm.2	Tmie	0.00283167	0.0993364	24	22	0.770746
TC0X00000990.mm.2	Pin4	0.00283167	0.0993364	24	22	0.148492
TC1000000191.mm.2	Slc18b1	0.00283167	0.0993364	24	22	0.590434
TC1000001579.mm.2	Prim1	0.00283167	0.0993364	24	20	0.772514
TC1300000718.mm.2	Ntrk2	0.00283167	0.0993364	24	16	0.795495
TC1300002036.mm.2	Nop16	0.00283167	0.0993364	24	20	0.328805
TC1400001528.mm.2	Kcnk5	0.00283167	0.0993364	24	14	0.586899
TC1400002060.mm.2	4931414P19Rik	0.00283167	0.0993364	24	18	0.583363
TC1600000409.mm.2	Bdh1	0.00283167	0.0993364	24	12	0.749533
TC1600000443.mm.2	Pcyt1a	0.00283167	0.0993364	24	16	0.268701
TC1600001461.mm.2	Atp13a3	0.00283167	0.0993364	24	8	0.201525
TC1900000062.mm.2	Eif1ad	0.00283167	0.0993364	24	16	0.226274
TC1900000186.mm.2	Fads3	0.00283167	0.0993364	24	20	0.461387
TC0100000790.mm.2	Ptma	0.00320304	0.106637	24	20	0.438406
TC0100001207.mm.2	Etnk2	0.00320304	0.106637	24	16	0.406586
TC0100001228.mm.2	Adipor1	0.00320304	0.106637	24	12	0.307591
TC0100002503.mm.2	Erbb4	0.00320304	0.106637	24	10	0.749533
TC0100002743.mm.2	Nmur1	0.00320304	0.106637	24	6	0.463155
TC0200000013.mm.2	Fam107b	0.00320304	0.106637	24	6	0.565685
TC0200002193.mm.2	Sstr4	0.00320304	0.106637	24	2	0.312895
TC0200003298.mm.2	Uck1	0.00320304	0.106637	24	22	0.502046
TC0200005328.mm.2	Gm14393	0.00320304	0.106637	24	18	0.350018
TC0200005502.mm.2	Ttbk2	0.00320304	0.106637	24	12	0.342947
TC0500001127.mm.2	Gm15446	0.00320304	0.106637	24	20	0.477297
TC0500003212.mm.2	Atp2a2	0.00320304	0.106637	24	22	0.413657
TC0700001865.mm.2	Stx4a	0.00320304	0.106637	24	0	0.247487
TC0700002034.mm.2	Ifitm1	0.00320304	0.106637	24	18	0.365928
TC0700003614.mm.2	Homer2	0.00320304	0.106637	24	14	0.392444
TC0800001895.mm.2	Ido2	0.00320304	0.106637	24	22	0.49851
TC0900000132.mm.2	Chordc1	0.00320304	0.106637	24	20	0.820244
TC0900000746.mm.2	Adpgk	0.00320304	0.106637	24	16	0.296985
TC0900001290.mm.2	Anapc13	0.00320304	0.106637	24	20	0.36416
TC0900001859.mm.2	Cdc37	0.00320304	0.106637	24	10	0.342947
TC0X00000973.mm.2	Gjb1	0.00320304	0.106637	24	6	0.201525
TC0Y00000254.mm.2	Gm20825	0.00320304	0.106637	24	4	0.183848
TC1000000571.mm.2	Ppa1	0.00320304	0.106637	24	22	0.148492
TC1100001632.mm.2	Stat5a	0.00320304	0.106637	24	2	0.350018
TC1100002013.mm.2	Chmp6	0.00320304	0.106637	24	6	0.417193
TC1100004204.mm.2	Nploc4	0.00320304	0.106637	24	10	0.219203
TC1400000770.mm.2	Ngdn	0.00320304	0.106637	24	16	0.289914
TC1500000022.mm.2	Ttc33	0.00320304	0.106637	24	4	0.289914
TC1600000335.mm.2	St6gal1	0.00320304	0.106637	24	8	0.525027
TC1700000355.mm.2	Igfals	0.00320304	0.106637	24	20	0.487904
TC1700002208.mm.2	Bysl	0.00320304	0.106637	24	18	0.436638
TC1700002573.mm.2	Atl2	0.00320304	0.106637	24	16	0.219203
TC1800000543.mm.2	Csnk1g3	0.00320304	0.106637	24	14	0.385373
TC1900000683.mm.2	Nolc1	0.00320304	0.106637	24	16	0.403051
TC0200000741.mm.2	Arhgap15	0.00357441	0.111636	24	10	0.668216
TC0200001377.mm.2	Lrp4	0.00357441	0.111636	24	14	0.489671
TC0200002721.mm.2	Gm14436; Gm8923	0.00357441	0.111636	24	16	0.279307
TC0200003292.mm.2	Fibcd1	0.00357441	0.111636	24	6	0.178544
TC0200005349.mm.2	Gm14308	0.00357441	0.111636	24	20	0.408354
TC0400000811.mm.2	Lurap1l	0.00357441	0.111636	24	10	0.470226
TC0400002713.mm.2	Epb41l4b	0.00357441	0.111636	24	14	0.339411
TC0500001162.mm.2	Pitpnb	0.00357441	0.111636	24	4	0.155563
TC0500002760.mm.2	Scarb2	0.00357441	0.111636	24	14	0.219203
TC0500002895.mm.2	Gbp10; Gbp6	0.00357441	0.111636	24	2	1.04652
TC0600001366.mm.2	Pex26	0.00357441	0.111636	24	20	0.502046
TC0600002013.mm.2	Lncpint	0.00357441	0.111636	24	8	0.505581
TC0700000228.mm.2	Tmem160	0.00357441	0.111636	24	22	0.219203
TC0700001015.mm.2	Fam169b	0.00357441	0.111636	24	16	0.374767
TC0700001372.mm.2	Prkrir	0.00357441	0.111636	24	14	0.226274
TC0700003658.mm.2	Zfand6	0.00357441	0.111636	24	8	0.434871
TC0700003719.mm.2	l7Rn6	0.00357441	0.111636	24	22	0.258094
TC0700004174.mm.2	Tmc7	0.00357441	0.111636	24	14	0.698268
TC0800001400.mm.2	Cmip	0.00357441	0.111636	24	14	0.34825
TC0900002820.mm.2	Morf4l1	0.00357441	0.111636	24	8	0.13435
TC0900002921.mm.2	Mras	0.00357441	0.111636	24	16	0.422496
TC0X00000121.mm.2	4930557A04Rik	0.00357441	0.111636	24	0	0.487904
TC1000000524.mm.2	Sh3rf3	0.00357441	0.111636	24	4	0.311127
TC1000001038.mm.2	Pwp1	0.00357441	0.111636	24	16	0.258094
TC1100000605.mm.2	Shroom1	0.00357441	0.111636	24	22	0.586899
TC1100001681.mm.2	Nags	0.00357441	0.111636	24	22	0.321734
TC1100002829.mm.2	2210407C18Rik	0.00357441	0.111636	24	18	1.30461
TC1100003872.mm.2	Plekhm1	0.00357441	0.111636	24	10	0.251023
TC1100004195.mm.2	Enthd2	0.00357441	0.111636	24	18	0.346482
TC1200000009.mm.2	Asxl2	0.00357441	0.111636	24	12	0.240416
TC1200001236.mm.2	Exoc3l4	0.00357441	0.111636	24	8	0.304056
TC1400002634.mm.2	Fbxl3	0.00357441	0.111636	24	8	0.304056
TC1500000388.mm.2	Mal2	0.00357441	0.111636	24	22	0.212132
TC1600001177.mm.2	Carhsp1	0.00357441	0.111636	24	6	0.342947
TC1600001287.mm.2	Pi4ka	0.00357441	0.111636	24	16	0.314663
TC1600001757.mm.2	Nit2	0.00357441	0.111636	24	4	0.392444
TC1700000750.mm.2	Rnf39	0.00357441	0.111636	24	12	0.399515
TC1700000833.mm.2	Adgrf5	0.00357441	0.111636	24	16	0.314663
TC1700000939.mm.2	Oard1	0.00357441	0.111636	24	8	0.185616
TC1700001652.mm.2	Tmem204	0.00357441	0.111636	24	16	0.365928
TC1700002420.mm.2	Ankrd12	0.00357441	0.111636	24	14	0.39598
TC1700002787.mm.2	Ddx39b; Mir8094	0.00357441	0.111636	24	22	0.19799
TC1900000008.mm.2	Cpt1a	0.00357441	0.111636	24	10	0.97404
TC1900001505.mm.2	Tm9sf3	0.00357441	0.111636	24	12	0.286378
TC0200000462.mm.2	Cacfd1	0.00403157	0.119049	24	12	0.286378
TC0200003115.mm.2	Ehmt1	0.00403157	0.119049	24	12	0.311127
TC0200005383.mm.2	Zfp931	0.00403157	0.119049	24	18	0.341179
TC0300000623.mm.2	Ppid	0.00403157	0.119049	24	16	0.268701
TC0300000979.mm.2	Hmgcs2	0.00403157	0.119049	24	10	0.183848
TC0400001527.mm.2	Tmem234	0.00403157	0.119049	24	16	0.19799
TC0400002153.mm.2	Nsmaf	0.00403157	0.119049	24	6	0.374767
TC0400002873.mm.2	Tmem261	0.00403157	0.119049	24	20	0.268701
TC0400003012.mm.2	Ifna2	0.00403157	0.119049	24	8	0.445477
TC0400003361.mm.2	Plk3	0.00403157	0.119049	24	14	1.11723
TC0500001308.mm.2	2410131K14Rik	0.00403157	0.119049	24	18	0.468458
TC0500001741.mm.2	Eif2ak1	0.00403157	0.119049	24	8	0.226274
TC0500001773.mm.2	Cyp3a57	0.00403157	0.119049	24	10	0.505581
TC0500002745.mm.2	G3bp2	0.00403157	0.119049	24	0	0.311127
TC0600001813.mm.2	Slc25a13	0.00403157	0.119049	24	14	0.452548
TC0600002635.mm.2	Pcyox1	0.00403157	0.119049	24	16	0.342947
TC0700001275.mm.2	Picalm	0.00403157	0.119049	24	14	0.222739
TC0700001644.mm.2	Mical2	0.00403157	0.119049	24	0	0.544472
TC0700003024.mm.2	Grwd1	0.00403157	0.119049	24	16	0.390676
TC0800002453.mm.2	Gm11034	0.00403157	0.119049	24	4	0.456084
TC0900001005.mm.2	Fam214a	0.00403157	0.119049	24	18	0.496743
TC0900001195.mm.2	Paqr9	0.00403157	0.119049	24	22	0.304056
TC0900001463.mm.2	Setd2	0.00403157	0.119049	24	10	0.265165
TC0900001927.mm.2	Herpud2	0.00403157	0.119049	24	8	0.259862
TC0900002914.mm.2	Gm1123	0.00403157	0.119049	24	4	0.272236
TC1000000031.mm.2	Gm10097	0.00403157	0.119049	24	2	0.205061
TC1000002604.mm.2	Mterf2	0.00403157	0.119049	24	8	0.341179
TC1100003829.mm.2	Hdac5; Mir8101	0.00403157	0.119049	24	22	0.381838
TC1500000296.mm.2	Atp6v1c1	0.00403157	0.119049	24	14	0.203293
TC1500000733.mm.2	Csdc2	0.00403157	0.119049	24	20	0.106066
TC1600000484.mm.2	Ropn1	0.00403157	0.119049	24	10	0.226274
TC1700000048.mm.2	Gtf2h5	0.00403157	0.119049	24	18	0.46669
TC1700000050.mm.2	Tulp4	0.00403157	0.119049	24	10	0.30052
TC1700001021.mm.2	Alkbh7	0.00403157	0.119049	24	22	0.475529
TC1700001160.mm.2	Birc6	0.00403157	0.119049	24	10	0.190919
TC1700001619.mm.2	Atp6v0c; Atp6v0c-ps2	0.00403157	0.119049	24	16	0.201525
TC1700002368.mm.2	Efna5	0.00403157	0.119049	24	16	0.222739
TC1700002637.mm.2	Haao	0.00403157	0.119049	24	2	0.417193
TC1800000677.mm.2	Zfp532	0.00403157	0.119049	24	10	0.445477
TC1800001000.mm.2	Osbpl1a	0.00403157	0.119049	24	8	0.268701
TC1900000402.mm.2	Kank1	0.00403157	0.119049	24	2	0.311127
TC0100001018.mm.2	Phlpp1	0.00448873	0.126654	24	10	0.289914
TC0200002961.mm.2	Pfkfb3	0.00448873	0.126654	24	12	0.502046
TC0200003752.mm.2	Cir1	0.00448873	0.126654	24	8	0.342947
TC0200005350.mm.2	Gm14308	0.00448873	0.126654	24	20	0.431335
TC0300000307.mm.2	Hspa4l	0.00448873	0.126654	24	20	0.6965
TC0300000413.mm.2	Smad9	0.00448873	0.126654	24	12	0.551543
TC0300003240.mm.2	Bnipl	0.00448873	0.126654	24	4	0.493207
TC0500002347.mm.2	Gm3414	0.00448873	0.126654	24	12	0.46669
TC0500002615.mm.2	Chic2	0.00448873	0.126654	24	8	0.397748
TC0600001158.mm.2	Ppp4r2	0.00448873	0.126654	24	10	0.406586
TC0600001458.mm.2	Scnn1a	0.00448873	0.126654	24	20	0.799031
TC0700001455.mm.2	Rrm1	0.00448873	0.126654	24	18	0.286378
TC0700003769.mm.2	Aqp11	0.00448873	0.126654	24	16	0.265165
TC0700004573.mm.2	Ins2	0.00448873	0.126654	24	2	0.339411
TC0800000526.mm.2	Lrp2bp	0.00448873	0.126654	24	10	0.509117
TC0800002107.mm.2	Cnot7	0.00448873	0.126654	24	10	0.33234
TC0900000737.mm.2	Nptn	0.00448873	0.126654	24	12	0.374767
TC0X00001940.mm.2	Gm21876	0.00448873	0.126654	24	0	0.33234
TC1000003115.mm.2	Inhbc	0.00448873	0.126654	24	14	0.624022
TC1000003127.mm.2	Hsd17b6	0.00448873	0.126654	24	10	1.18087
TC1100000935.mm.2	Phf23	0.00448873	0.126654	24	10	0.330572
TC1100001771.mm.2	Taco1	0.00448873	0.126654	24	22	0.26163
TC1100002062.mm.2	Narf	0.00448873	0.126654	24	12	0.293449
TC1100002836.mm.2	Rnf187	0.00448873	0.126654	24	20	0.226274
TC1200000089.mm.2	Smc6	0.00448873	0.126654	24	8	0.183848
TC1200001982.mm.2	Zfyve26	0.00448873	0.126654	24	6	0.367696
TC1300000258.mm.2	Hist1h1c	0.00448873	0.126654	24	16	0.601041
TC1300000551.mm.2	Id4	0.00448873	0.126654	24	6	0.33234
TC1500001214.mm.2	Tars	0.00448873	0.126654	24	0	0.334108
TC1600000650.mm.2	Naa50	0.00448873	0.126654	24	14	0.289914
TC1700000268.mm.2	Vmn1r237	0.00448873	0.126654	24	0	0.298753
TC1700001827.mm.2	Sik1	0.00448873	0.126654	24	22	0.599273
TC1800001149.mm.2	Fam13b	0.00448873	0.126654	24	4	0.311127
TC1900000882.mm.2	Lrp5	0.00448873	0.126654	24	4	0.551543
TC1900001726.mm.2	Hspa12a	0.00448873	0.126654	24	14	0.175009
TC0100000657.mm.2	Des	0.00504867	0.137055	24	16	0.441942
TC0100003253.mm.2	Swt1	0.00504867	0.137055	24	18	0.452548
TC0100003449.mm.2	Mpzl1	0.00504867	0.137055	24	2	0.717713
TC0200001898.mm.2	Slc27a2	0.00504867	0.137055	24	12	0.339411
TC0200005331.mm.2	Gm14399	0.00504867	0.137055	24	18	0.268701
TC0300000769.mm.2	Adar	0.00504867	0.137055	24	22	0.399515
TC0400000458.mm.2	Glipr2	0.00504867	0.137055	24	2	0.33234
TC0400001318.mm.2	Olfr1331	0.00504867	0.137055	24	2	0.304056
TC0400001990.mm.2	Errfi1	0.00504867	0.137055	24	10	1.3435
TC0400003740.mm.2	Mtfr1l	0.00504867	0.137055	24	18	0.120208
TC0500001087.mm.2	Rpl5	0.00504867	0.137055	24	16	0.169706
TC0500002756.mm.2	Cxcl10	0.00504867	0.137055	24	20	0.608112
TC0500003585.mm.2	Smurf1	0.00504867	0.137055	24	10	0.263397
TC0500003619.mm.2	Lnx2	0.00504867	0.137055	24	22	0.579828
TC0600000466.mm.2	Olfr38	0.00504867	0.137055	24	22	0.282843
TC0600000775.mm.2	Gng12	0.00504867	0.137055	24	16	0.187383
TC0700000663.mm.2	Ankrd27	0.00504867	0.137055	24	10	0.371231
TC0700004666.mm.2	Fgfr2	0.00504867	0.137055	24	8	0.424264
TC0800000259.mm.2	Defb1	0.00504867	0.137055	24	6	0.4826
TC0800001258.mm.2	Cirh1a	0.00504867	0.137055	24	18	0.381838
TC0800001891.mm.2	1810011O10Rik	0.00504867	0.137055	24	16	0.852064
TC0900000504.mm.2	Dpagt1	0.00504867	0.137055	24	18	0.463155
TC0X00000988.mm.2	Nhsl2	0.00504867	0.137055	24	0	0.39598
TC1000000355.mm.2	Ddo	0.00504867	0.137055	24	18	0.381838
TC1000002164.mm.2	Cep85l	0.00504867	0.137055	24	10	0.449013
TC1000002586.mm.2	Appl2	0.00504867	0.137055	24	6	0.275772
TC1100000601.mm.2	Aff4	0.00504867	0.137055	24	10	0.219203
TC1200001468.mm.2	Atp6v1c2	0.00504867	0.137055	24	4	0.208597
TC1400001537.mm.2	Anxa7	0.00504867	0.137055	24	10	0.795495
TC1600001277.mm.2	2610318N02Rik	0.00504867	0.137055	24	22	0.148492
TC1600001974.mm.2	Adamts1	0.00504867	0.137055	24	16	0.254558
TC0100000071.mm.2	Xkr9	0.00560861	0.143155	24	10	0.206829
TC0100000688.mm.2	Mrpl44	0.00560861	0.143155	24	0	0.235113
TC0100001685.mm.2	Cox20	0.00560861	0.143155	24	2	0.275772
TC0200002184.mm.2	Pax1	0.00560861	0.143155	24	0	0.18208
TC0200002720.mm.2	Gm14431; Gm8898	0.00560861	0.143155	24	18	0.298753
TC0200002738.mm.2	Gm8898; Gm14431	0.00560861	0.143155	24	18	0.298753
TC0200002741.mm.2	Gm14295	0.00560861	0.143155	24	18	0.334108
TC0200002755.mm.2	Etohi1	0.00560861	0.143155	24	16	0.219203
TC0200005181.mm.2	Znfx1	0.00560861	0.143155	24	22	0.281075
TC0200005281.mm.2	Bmp7	0.00560861	0.143155	24	16	0.477297
TC0200005341.mm.2	Gm14431; Gm8898	0.00560861	0.143155	24	18	0.298753
TC0200005346.mm.2	Gm2004	0.00560861	0.143155	24	18	0.353553
TC0200005491.mm.2	Gm14419	0.00560861	0.143155	24	18	0.353553
TC0300000631.mm.2	Pdgfc	0.00560861	0.143155	24	0	0.479065
TC0300003103.mm.2	Dnase2b	0.00560861	0.143155	24	16	0.68059
TC0400004039.mm.2	Ube4b	0.00560861	0.143155	24	10	0.219203
TC0500000819.mm.2	Slc4a4	0.00560861	0.143155	24	6	0.83085
TC0500002940.mm.2	Tmed5	0.00560861	0.143155	24	12	0.392444
TC0700001387.mm.2	Klhl35	0.00560861	0.143155	24	8	0.4278
TC0700001886.mm.2	Bag3	0.00560861	0.143155	24	16	0.560382
TC0700002636.mm.2	Ceacam2	0.00560861	0.143155	24	4	0.148492
TC0800000659.mm.2	Ddx60	0.00560861	0.143155	24	0	0.576292
TC0800002303.mm.2	Anxa10	0.00560861	0.143155	24	20	0.270468
TC0900000247.mm.2	Eepd1	0.00560861	0.143155	24	6	0.39598
TC0900002245.mm.2	Htr3a	0.00560861	0.143155	24	4	0.254558
TC0900003122.mm.2	Rtp3	0.00560861	0.143155	24	22	0.62579
TC0900003199.mm.2	Tgfbr2	0.00560861	0.143155	24	10	0.282843
TC0X00000073.mm.2	Otud5	0.00560861	0.143155	24	8	0.233345
TC0X00001447.mm.2	Htr2c	0.00560861	0.143155	24	8	0.173241
TC0X00003420.mm.2	Uxt	0.00560861	0.143155	24	18	0.235113
TC0Y00000223.mm.2	Erdr1	0.00560861	0.143155	24	22	0.708875
TC1100000264.mm.2	Fancl	0.00560861	0.143155	24	10	0.341179
TC1100000464.mm.2	Adam19	0.00560861	0.143155	24	2	0.392444
TC1100000975.mm.2	Mis12	0.00560861	0.143155	24	16	0.215668
TC1100002907.mm.2	Aldh3a2	0.00560861	0.143155	24	10	0.378302
TC1100003147.mm.2	Spns3	0.00560861	0.143155	24	4	0.254558
TC1100004266.mm.2	Irgm2	0.00560861	0.143155	24	22	0.608112
TC1200000359.mm.2	Dock4	0.00560861	0.143155	24	6	0.335876
TC1300000022.mm.2	Akr1c6	0.00560861	0.143155	24	8	0.335876
TC1300001178.mm.2	Srek1ip1	0.00560861	0.143155	24	6	0.173241
TC1500001716.mm.2	2300005B03Rik	0.00560861	0.143155	24	4	0.34825
TC1500002327.mm.2	Prlr	0.00560861	0.143155	24	4	0.205061
TC1600000168.mm.2	Mpv17l	0.00560861	0.143155	24	20	0.730088
TC1600001667.mm.2	Phldb2	0.00560861	0.143155	24	12	0.337643
TC1700000602.mm.2	Rgl2	0.00560861	0.143155	24	18	0.36416
TC1700001522.mm.2	Fpr1	0.00560861	0.143155	24	18	0.544472
TC1700002655.mm.2	Abcg5	0.00560861	0.143155	24	10	0.940452
TC1800000060.mm.2	Fzd8	0.00560861	0.143155	24	6	0.668216
TC1800000249.mm.2	Lims2	0.00560861	0.143155	24	12	0.431335
TC1800001026.mm.2	Cdh2	0.00560861	0.143155	24	10	0.293449
TC1900000501.mm.2	Ifit3	0.00560861	0.143155	24	0	0.723017
TC1900001390.mm.2	Sgms1	0.00560861	0.143155	24	8	0.553311
TC0100002349.mm.2	Pgap1	0.00629109	0.152511	24	12	0.410122
TC0100002954.mm.2	Ptpn4	0.00629109	0.152511	24	8	0.293449
TC0200000545.mm.2	Tor1b	0.00629109	0.152511	24	16	0.19799
TC0200003203.mm.2	Med22	0.00629109	0.152511	24	14	0.215668
TC0300002087.mm.2	Vmn2r6	0.00629109	0.152511	24	0	0.346482
TC0300002357.mm.2	Il6ra	0.00629109	0.152511	24	12	0.972272
TC0300002450.mm.2	Tuft1	0.00629109	0.152511	24	10	0.330572
TC0400001970.mm.2	Slc2a5	0.00629109	0.152511	24	12	0.350018
TC0400002637.mm.2	Mrpl50	0.00629109	0.152511	24	20	0.240416
TC0500000286.mm.2	Hadhb	0.00629109	0.152511	24	12	0.26163
TC0500000914.mm.2	Gm3259	0.00629109	0.152511	24	22	0.441942
TC0500001663.mm.2	Fam20c	0.00629109	0.152511	24	16	0.392444
TC0500002178.mm.2	Ppm1g	0.00629109	0.152511	24	12	0.254558
TC0700000219.mm.2	Napa	0.00629109	0.152511	24	16	0.180312
TC0700000368.mm.2	Zfp180	0.00629109	0.152511	24	14	0.219203
TC0700003657.mm.2	Fah	0.00629109	0.152511	24	6	0.219203
TC0700004252.mm.2	Gm21957	0.00629109	0.152511	24	2	0.388909
TC0800000231.mm.2	Gm15299	0.00629109	0.152511	24	4	0.473762
TC0800001520.mm.2	Tcf25	0.00629109	0.152511	24	10	0.226274
TC0800002377.mm.2	Gatad2a	0.00629109	0.152511	24	12	0.282843
TC0800002824.mm.2	Atp6v0d1	0.00629109	0.152511	24	14	0.194454
TC0800003007.mm.2	1700030J22Rik	0.00629109	0.152511	24	2	0.282843
TC0900002128.mm.2	Oaf	0.00629109	0.152511	24	16	0.270468
TC1000000385.mm.2	Ostm1	0.00629109	0.152511	24	16	0.296985
TC1000001560.mm.2	Arhgap9	0.00629109	0.152511	24	8	0.350018
TC1000001577.mm.2	Sdr9c7	0.00629109	0.152511	24	20	0.6965
TC1000001684.mm.2	Syne1	0.00629109	0.152511	24	2	0.528562
TC1000002055.mm.2	Ccdc162	0.00629109	0.152511	24	2	0.615183
TC1000002580.mm.2	Slc41a2	0.00629109	0.152511	24	0	0.66468
TC1000003112.mm.2	Mars	0.00629109	0.152511	24	14	0.33234
TC1000003152.mm.2	Pa2g4	0.00629109	0.152511	24	18	0.296985
TC1000003181.mm.2	Olfr777	0.00629109	0.152511	24	4	0.304056
TC1100000459.mm.2	Clint1	0.00629109	0.152511	24	6	0.208597
TC1100003758.mm.2	Krt19	0.00629109	0.152511	24	18	0.325269
TC1200001058.mm.2	Tcl1b4	0.00629109	0.152511	24	6	0.569221
TC1200001880.mm.2	Sav1	0.00629109	0.152511	24	6	0.240416
TC1600000237.mm.2	Gm7873	0.00629109	0.152511	24	12	0.367696
TC1700001744.mm.2	D17Wsu92e	0.00629109	0.152511	24	10	0.282843
TC1700001857.mm.2	Cyp4f13	0.00629109	0.152511	24	18	0.296985
TC1700001989.mm.2	Abcf1	0.00629109	0.152511	24	16	0.19799
TC1700002042.mm.2	Znrd1	0.00629109	0.152511	24	20	0.371231
TC1700002189.mm.2	Cnpy3	0.00629109	0.152511	24	20	0.268701
TC1800000401.mm.2	Ndfip1	0.00629109	0.152511	24	10	0.219203
TC1900000521.mm.2	Tnks2	0.00629109	0.152511	24	8	0.176777
TC1900001253.mm.2	Gda	0.00629109	0.152511	24	18	0.431335
TC1900001484.mm.2	Pdlim1	0.00629109	0.152511	24	20	0.46669
TC0100000395.mm.2	Hspe1	0.00697357	0.159645	24	22	0.178544
TC0100000633.mm.2	Ctdsp1	0.00697357	0.159645	24	10	0.304056
TC0100000892.mm.2	Scly	0.00697357	0.159645	24	0	0.305824
TC0100000925.mm.2	Agxt	0.00697357	0.159645	24	6	0.49851
TC0100003697.mm.2	Lbr	0.00697357	0.159645	24	14	0.350018
TC0200001310.mm.2	Olfr1152	0.00697357	0.159645	24	0	0.307591
TC0200004219.mm.2	Cd44	0.00697357	0.159645	24	16	0.215668
TC0200005347.mm.2	Gm11009	0.00697357	0.159645	24	20	0.360624
TC0300003005.mm.2	Gm4861	0.00697357	0.159645	24	0	0.318198
TC0400000317.mm.2	Ifnk	0.00697357	0.159645	24	8	0.330572
TC0400001312.mm.2	Ebna1bp2; D4Ertd617e	0.00697357	0.159645	24	16	0.205061
TC0400001510.mm.2	Rnf19b	0.00697357	0.159645	24	10	0.399515
TC0400002705.mm.2	Ikbkap	0.00697357	0.159645	24	16	0.431335
TC0500001715.mm.2	Foxk1	0.00697357	0.159645	24	10	0.353553
TC0500001936.mm.2	Crot	0.00697357	0.159645	24	8	0.892722
TC0500003711.mm.2	Lrrc8d	0.00697357	0.159645	24	0	0.56215
TC0600000902.mm.2	Eva1a	0.00697357	0.159645	24	14	0.381838
TC0700001423.mm.2	Fchsd2	0.00697357	0.159645	24	10	0.321734
TC0700002085.mm.2	Gm6471	0.00697357	0.159645	24	4	0.353553
TC0700002357.mm.2	Zbtb45	0.00697357	0.159645	24	4	0.212132
TC0700002982.mm.2	Scaf1	0.00697357	0.159645	24	14	0.311127
TC0700003568.mm.2	Pex11a	0.00697357	0.159645	24	12	0.657609
TC0700003650.mm.2	Abhd17c	0.00697357	0.159645	24	6	0.388909
TC0700004072.mm.2	Lmo1	0.00697357	0.159645	24	2	0.173241
TC0800000072.mm.2	Gm10217	0.00697357	0.159645	24	4	0.323501
TC0800000707.mm.2	Lpl	0.00697357	0.159645	24	6	0.403051
TC0800000931.mm.2	Ptger1	0.00697357	0.159645	24	4	0.127279
TC0800002012.mm.2	Rbpms	0.00697357	0.159645	24	8	0.512652
TC0900000848.mm.2	Rbpms2	0.00697357	0.159645	24	8	0.293449
TC0900001295.mm.2	Ryk	0.00697357	0.159645	24	12	0.438406
TC0900002212.mm.2	Tagln	0.00697357	0.159645	24	18	0.671751
TC0900003299.mm.2	Zdhhc3	0.00697357	0.159645	24	14	0.190919
TC0Y00000032.mm.2	LOC100039595	0.00697357	0.159645	24	4	0.325269
TC0Y00000046.mm.2	LOC100040262	0.00697357	0.159645	24	4	0.325269
TC1000000349.mm.2	Cdk19	0.00697357	0.159645	24	8	0.212132
TC1000000534.mm.2	Pla2g12b	0.00697357	0.159645	24	4	0.381838
TC1000001596.mm.2	Stat2	0.00697357	0.159645	24	20	0.548008
TC1000002195.mm.2	Serinc1	0.00697357	0.159645	24	14	0.155563
TC1000002535.mm.2	Tjp3	0.00697357	0.159645	24	0	0.49851
TC1000002645.mm.2	Chpt1	0.00697357	0.159645	24	16	0.410122
TC1100000544.mm.2	Hnrnph1	0.00697357	0.159645	24	6	0.157331
TC1100002001.mm.2	Slc26a11	0.00697357	0.159645	24	12	0.447245
TC1100003815.mm.2	Meox1	0.00697357	0.159645	24	22	0.206829
TC1300001451.mm.2	Gpr137b-ps	0.00697357	0.159645	24	14	0.438406
TC1400000513.mm.2	Lgals3	0.00697357	0.159645	24	22	0.367696
TC1400001725.mm.2	Sncg	0.00697357	0.159645	24	22	0.212132
TC1400002476.mm.2	Dgkh	0.00697357	0.159645	24	10	0.484368
TC1500001192.mm.2	Skp2	0.00697357	0.159645	24	20	0.749533
TC1600000379.mm.2	Ccdc50	0.00697357	0.159645	24	8	0.192687
TC1800000199.mm.2	Elp2	0.00697357	0.159645	24	0	0.233345
TC1800000641.mm.2	Htr4	0.00697357	0.159645	24	4	0.468458
TC1900000108.mm.2	Atg2a	0.00697357	0.159645	24	8	0.365928
TC1900000249.mm.2	Gm4952	0.00697357	0.159645	24	8	1.35411
TC1900000888.mm.2	Tcirg1	0.00697357	0.159645	24	22	0.189151
TC0100002175.mm.2	Uggt1	0.00780142	0.169842	24	20	0.369463
TC0100003610.mm.2	Fh1	0.00780142	0.169842	24	16	0.205061
TC0200000457.mm.2	Rpl7a	0.00780142	0.169842	24	16	0.160867
TC0200000879.mm.2	Upp2	0.00780142	0.169842	24	12	0.852064
TC0200001858.mm.2	Bloc1s6	0.00780142	0.169842	24	0	0.376534
TC0200002803.mm.2	Slc17a9	0.00780142	0.169842	24	20	0.579828
TC0300003106.mm.2	Prkacb	0.00780142	0.169842	24	10	0.268701
TC0400000432.mm.2	Unc13b	0.00780142	0.169842	24	16	0.362392
TC0400002238.mm.2	Necab1	0.00780142	0.169842	24	4	0.388909
TC0400002392.mm.2	Zfp292	0.00780142	0.169842	24	8	0.477297
TC0400002460.mm.2	Ubap2	0.00780142	0.169842	24	16	0.374767
TC0500000221.mm.2	Nub1	0.00780142	0.169842	24	2	0.307591
TC0500002488.mm.2	Smim14	0.00780142	0.169842	24	16	0.13435
TC0500003168.mm.2	Plbd2	0.00780142	0.169842	24	16	0.281075
TC0500003245.mm.2	Vps37b	0.00780142	0.169842	24	20	0.401283
TC0600002044.mm.2	Slc35b4	0.00780142	0.169842	24	20	0.360624
TC0600002484.mm.2	Usp39	0.00780142	0.169842	24	18	0.321734
TC0600002548.mm.2	Pole4	0.00780142	0.169842	24	18	0.183848
TC0600003250.mm.2	Klra17	0.00780142	0.169842	24	22	0.475529
TC0700001461.mm.2	Olfr552	0.00780142	0.169842	24	14	0.26163
TC0700004302.mm.2	Taok2	0.00780142	0.169842	24	14	0.176777
TC0800001089.mm.2	Ogfod1	0.00780142	0.169842	24	20	0.346482
TC0800002400.mm.2	Pgpep1	0.00780142	0.169842	24	20	0.480833
TC0800002508.mm.2	Pou4f2	0.00780142	0.169842	24	2	0.259862
TC0900001864.mm.2	S1pr5	0.00780142	0.169842	24	18	0.268701
TC0900003040.mm.2	Slc38a3	0.00780142	0.169842	24	10	0.215668
TC0900003300.mm.2	Cdcp1	0.00780142	0.169842	24	0	0.473762
TC0X00001700.mm.2	Arhgap6	0.00780142	0.169842	24	8	0.392444
TC1000000763.mm.2	Gm10272	0.00780142	0.169842	24	2	0.263397
TC1100001176.mm.2	Nf1	0.00780142	0.169842	24	8	0.266933
TC1200000521.mm.2	Gm527	0.00780142	0.169842	24	2	0.289914
TC1200000680.mm.2	Ppp1r36	0.00780142	0.169842	24	0	0.265165
TC1200001552.mm.2	Rsad2	0.00780142	0.169842	24	22	0.639932
TC1300001448.mm.2	Lgals8	0.00780142	0.169842	24	20	0.357089
TC1300001789.mm.2	Pxdc1	0.00780142	0.169842	24	0	0.753069
TC1300001940.mm.2	Zfp169	0.00780142	0.169842	24	6	0.240416
TC1300002131.mm.2	Gas1	0.00780142	0.169842	24	20	0.272236
TC1400000364.mm.2	Gdf2	0.00780142	0.169842	24	16	0.266933
TC1400000574.mm.2	Pnp	0.00780142	0.169842	24	0	0.298753
TC1400001559.mm.2	Comtd1	0.00780142	0.169842	24	16	0.159099
TC1400002626.mm.2	Gm9922	0.00780142	0.169842	24	8	0.296985
TC1500000014.mm.2	C6	0.00780142	0.169842	24	16	0.399515
TC1500000654.mm.2	Cdc42ep1	0.00780142	0.169842	24	14	0.39598
TC1500000963.mm.2	Slc48a1	0.00780142	0.169842	24	14	0.235113
TC1500001197.mm.2	Il7r	0.00780142	0.169842	24	10	0.579828
TC1600002136.mm.2	Brwd1	0.00780142	0.169842	24	8	0.325269
TC1800001111.mm.2	Syt4	0.00780142	0.169842	24	8	0.438406
TC1800001461.mm.2	Fech	0.00780142	0.169842	24	12	0.279307
TC1900000340.mm.2	Zfand5	0.00780142	0.169842	24	6	0.339411
TC1900001415.mm.2	Acta2	0.00780142	0.169842	24	18	1.03945
TC0100000375.mm.2	Stat1	0.00862927	0.176285	24	0	0.537401
TC0100000921.mm.2	Rnpepl1	0.00862927	0.176285	24	12	0.30052
TC0100001076.mm.2	Tmem185b	0.00862927	0.176285	24	14	0.296985
TC0100001351.mm.2	Ivns1abp	0.00862927	0.176285	24	16	0.404819
TC0200000033.mm.2	Bend7	0.00862927	0.176285	24	10	0.551543
TC0200001267.mm.2	Olfr1036	0.00862927	0.176285	24	18	0.321734
TC0200002367.mm.2	Acss2	0.00862927	0.176285	24	0	0.714178
TC0200002729.mm.2	Gm6710; Gm14391	0.00862927	0.176285	24	20	0.28461
TC0200002863.mm.2	Prpf18	0.00862927	0.176285	24	8	0.190919
TC0200004898.mm.2	Sox12	0.00862927	0.176285	24	18	0.304056
TC0200005335.mm.2	Gm14308; Gm14430; Gm14432; Gm4724; 0610010B08Rik	0.00862927	0.176285	24	20	0.4278
TC0300000272.mm.2	4932438A13Rik	0.00862927	0.176285	24	0	0.268701
TC0300002838.mm.2	Tmem56	0.00862927	0.176285	24	8	0.30052
TC0300003165.mm.2	Gm5858	0.00862927	0.176285	24	4	0.169706
TC0400004009.mm.2	Clcn6	0.00862927	0.176285	24	22	0.24572
TC0500000374.mm.2	Fam193a	0.00862927	0.176285	24	6	0.233345
TC0500001410.mm.2	Setd1b	0.00862927	0.176285	24	8	0.399515
TC0500002650.mm.2	Noa1	0.00862927	0.176285	24	14	0.350018
TC0600001970.mm.2	Rbm28	0.00862927	0.176285	24	16	0.26163
TC0600002572.mm.2	Dguok	0.00862927	0.176285	24	10	0.233345
TC0600002674.mm.2	Rab7	0.00862927	0.176285	24	14	0.176777
TC0700000972.mm.2	E030018B13Rik	0.00862927	0.176285	24	16	1.67231
TC0700001871.mm.2	Fus	0.00862927	0.176285	24	6	0.392444
TC0700002253.mm.2	Vmn2r41	0.00862927	0.176285	24	20	0.247487
TC0700002643.mm.2	Hnrnpul1	0.00862927	0.176285	24	6	0.155563
TC0700003946.mm.2	Trim30d	0.00862927	0.176285	24	22	0.247487
TC0800001307.mm.2	Tat	0.00862927	0.176285	24	18	0.249255
TC0800002113.mm.2	Mtus1	0.00862927	0.176285	24	6	0.440174
TC0800003008.mm.2	Gcsh	0.00862927	0.176285	24	4	0.226274
TC0X00000557.mm.2	C230004F18Rik	0.00862927	0.176285	24	2	0.180312
TC0X00000627.mm.2	1110012L19Rik	0.00862927	0.176285	24	8	0.289914
TC0X00000704.mm.2	Rpl10; Snora70	0.00862927	0.176285	24	18	0.205061
TC0X00001403.mm.2	Gm5643	0.00862927	0.176285	24	8	0.249255
TC0Y00000551.mm.2	Gm21860	0.00862927	0.176285	24	22	0.675287
TC0Y00000552.mm.2	Gm21748	0.00862927	0.176285	24	22	0.675287
TC1000000891.mm.2	Apba3; Mir3057	0.00862927	0.176285	24	22	0.275772
TC1000001375.mm.2	Il22	0.00862927	0.176285	24	2	0.26163
TC1000002305.mm.2	Reep3	0.00862927	0.176285	24	16	0.205061
TC1100000021.mm.2	Morc2a	0.00862927	0.176285	24	14	0.307591
TC1100000614.mm.2	Irf1	0.00862927	0.176285	24	22	0.231577
TC1100000738.mm.2	Nt5m	0.00862927	0.176285	24	22	0.233345
TC1100001115.mm.2	Ssh2	0.00862927	0.176285	24	10	0.424264
TC1100002240.mm.2	Sec61g	0.00862927	0.176285	24	20	0.304056
TC1100002869.mm.2	Srebf1; Mir6922	0.00862927	0.176285	24	20	1.00763
TC1100004063.mm.2	Fdxr	0.00862927	0.176285	24	6	0.240416
TC1200000502.mm.2	Mia2	0.00862927	0.176285	24	12	0.39598
TC1300000514.mm.2	Jarid2	0.00862927	0.176285	24	14	0.392444
TC1300001266.mm.2	Slc38a9	0.00862927	0.176285	24	16	0.175009
TC1400000109.mm.2	Atxn7	0.00862927	0.176285	24	14	0.357089
TC1400000418.mm.2	1700049E17Rik2	0.00862927	0.176285	24	2	0.378302
TC1400001054.mm.2	Lcp1	0.00862927	0.176285	24	12	0.325269
TC1400001470.mm.2	Thoc7	0.00862927	0.176285	24	14	0.309359
TC1500000854.mm.2	Pim3	0.00862927	0.176285	24	14	0.678823
TC1500001996.mm.2	5031439G07Rik; Mir1249	0.00862927	0.176285	24	10	0.341179
TC1600000097.mm.2	1810013L24Rik	0.00862927	0.176285	24	10	0.268701
TC1600000940.mm.2	Gabpa	0.00862927	0.176285	24	8	0.22981
TC1600001008.mm.2	Son	0.00862927	0.176285	24	2	0.187383
TC1600001057.mm.2	Ttc3	0.00862927	0.176285	24	12	0.282843
TC1600002166.mm.2	Naa60	0.00862927	0.176285	24	14	0.176777
TC1600002182.mm.2	Donson	0.00862927	0.176285	24	14	0.226274
TC1700002131.mm.2	Tdrd6	0.00862927	0.176285	24	4	0.305824
TC1700002504.mm.2	Alk	0.00862927	0.176285	24	22	0.328805
TC1800000084.mm.2	Mib1	0.00862927	0.176285	24	8	0.127279
TC1800000286.mm.2	Pkd2l2	0.00862927	0.176285	24	16	0.369463
TC1900000259.mm.2	Gm5512	0.00862927	0.176285	24	20	0.34825
TC1900000588.mm.2	Gm6747	0.00862927	0.176285	24	12	0.26163
TC1900001029.mm.2	Nudt22	0.00862927	0.176285	24	22	0.247487
TC0100000946.mm.2	Ing5	0.00962874	0.188218	24	10	0.339411
TC0100002411.mm.2	Wdr12	0.00962874	0.188218	24	18	0.441942
TC0100002495.mm.2	Acadl	0.00962874	0.188218	24	12	0.302288
TC0200001011.mm.2	Phospho2	0.00962874	0.188218	24	16	0.212132
TC0200003991.mm.2	Olfr1135	0.00962874	0.188218	24	20	0.22981
TC0300001719.mm.2	Naaladl2	0.00962874	0.188218	24	12	0.477297
TC0400001325.mm.2	Slc2a1	0.00962874	0.188218	24	20	0.339411
TC0400001930.mm.2	Mtor	0.00962874	0.188218	24	8	0.357089
TC0400002372.mm.2	Pm20d2	0.00962874	0.188218	24	22	0.266933
TC0500001240.mm.2	Oasl1	0.00962874	0.188218	24	20	0.615183
TC0500003625.mm.2	Urad	0.00962874	0.188218	24	20	0.36416
TC0600001441.mm.2	Zfp384	0.00962874	0.188218	24	10	0.22981
TC0600002500.mm.2	Kcmf1	0.00962874	0.188218	24	12	0.169706
TC0700000583.mm.2	Fam187b	0.00962874	0.188218	24	20	0.450781
TC0700000732.mm.2	2610021A01Rik	0.00962874	0.188218	24	18	0.36416
TC0800000123.mm.2	Lamp1	0.00962874	0.188218	24	8	0.120208
TC0800001244.mm.2	Pla2g15	0.00962874	0.188218	24	18	0.502046
TC0800002960.mm.2	Adat1	0.00962874	0.188218	24	16	0.19799
TC0800003218.mm.2	Map2k7	0.00962874	0.188218	24	10	0.563918
TC0900000204.mm.2	Ldlr	0.00962874	0.188218	24	20	0.473762
TC0900003338.mm.2	Dync2h1	0.00962874	0.188218	24	16	0.426032
TC0X00001793.mm.2	Suv39h1	0.00962874	0.188218	24	16	0.335876
TC0X00003360.mm.2	Tlr7	0.00962874	0.188218	24	18	0.399515
TC0X00003428.mm.2	Xlr5c	0.00962874	0.188218	24	4	0.311127
TC1000000002.mm.2	Ppp1r14c	0.00962874	0.188218	24	4	0.205061
TC1000002921.mm.2	Frs2	0.00962874	0.188218	24	6	0.205061
TC1100000708.mm.2	2810021J22Rik	0.00962874	0.188218	24	2	0.311127
TC1100000887.mm.2	Slc25a35	0.00962874	0.188218	24	22	0.251023
TC1100001419.mm.2	Mbtd1	0.00962874	0.188218	24	8	0.463155
TC1100001578.mm.2	Psmd3	0.00962874	0.188218	24	8	0.243952
TC1100003066.mm.2	Tmem102	0.00962874	0.188218	24	22	0.304056
TC1100003225.mm.2	Wdr81	0.00962874	0.188218	24	8	0.350018
TC1100003478.mm.2	Rad51c	0.00962874	0.188218	24	20	1.04652
TC1200001028.mm.2	Otub2	0.00962874	0.188218	24	16	0.342947
TC1300000266.mm.2	Slc17a3	0.00962874	0.188218	24	22	0.507349
TC1500001121.mm.2	Hoxc6	0.00962874	0.188218	24	22	0.304056
TC1500001689.mm.2	Ago2	0.00962874	0.188218	24	14	0.318198
TC1500001831.mm.2	Tst	0.00962874	0.188218	24	22	0.369463
TC1600000558.mm.2	Tmem39a	0.00962874	0.188218	24	16	0.282843
TC1600001458.mm.2	Cpn2	0.00962874	0.188218	24	0	0.16617
TC1700001606.mm.2	Tceb2	0.00962874	0.188218	24	16	0.185616
TC1700001986.mm.2	Atat1	0.00962874	0.188218	24	4	0.296985
TC1800000107.mm.2	Cabyr	0.00962874	0.188218	24	18	0.500278
TC1800000361.mm.2	Pcdhb7	0.00962874	0.188218	24	18	0.162635
TC1900000171.mm.2	Ahnak; Mir6367	0.00962874	0.188218	24	14	0.318198
TC1900000700.mm.2	Sufu	0.00962874	0.188218	24	16	0.208597
TC1900000819.mm.2	Atrnl1	0.00962874	0.188218	24	16	0.266933
TC1900001270.mm.2	Fam189a2	0.00962874	0.188218	24	10	0.342947
TC1900001485.mm.2	Sorbs1	0.00962874	0.188218	24	10	0.579828
TC0100000021.mm.2	Rb1cc1	0.0106282	0.194407	24	8	0.355321
TC0100000428.mm.2	Aox3	0.0106282	0.194407	24	8	0.525027
TC0100001234.mm.2	Kdm5b	0.0106282	0.194407	24	6	0.208597
TC0100001644.mm.2	Spta1	0.0106282	0.194407	24	2	0.353553
TC0100002285.mm.2	Slc40a1	0.0106282	0.194407	24	12	0.4278
TC0100003021.mm.2	Zranb3	0.0106282	0.194407	24	14	0.374767
TC0200001352.mm.2	Nup160	0.0106282	0.194407	24	16	0.282843
TC0200002435.mm.2	Adig	0.0106282	0.194407	24	18	0.335876
TC0200002452.mm.2	Top1	0.0106282	0.194407	24	16	0.274004
TC0200005344.mm.2	Gm8898; Gm14431	0.0106282	0.194407	24	18	0.357089
TC0300000172.mm.2	Tnik	0.0106282	0.194407	24	10	0.335876
TC0300001232.mm.2	Cnn3	0.0106282	0.194407	24	12	0.152028
TC0300002410.mm.2	Lce1j	0.0106282	0.194407	24	4	0.367696
TC0300003173.mm.2	Acadm	0.0106282	0.194407	24	10	0.394212
TC0400001482.mm.2	Gm12942; Zmym6	0.0106282	0.194407	24	20	0.46669
TC0400001502.mm.2	Phc2	0.0106282	0.194407	24	22	0.220971
TC0400001530.mm.2	Ptp4a2	0.0106282	0.194407	24	12	0.171473
TC0400002174.mm.2	Car8	0.0106282	0.194407	24	8	0.365928
TC0400003530.mm.2	Thrap3	0.0106282	0.194407	24	10	0.39598
TC0400004034.mm.2	Pgd	0.0106282	0.194407	24	22	0.282843
TC0500000683.mm.2	Ociad1	0.0106282	0.194407	24	20	0.155563
TC0600000361.mm.2	Atp6v0c	0.0106282	0.194407	24	14	0.258094
TC0600001093.mm.2	Ccdc174	0.0106282	0.194407	24	14	0.357089
TC0600002904.mm.2	Srgap3	0.0106282	0.194407	24	22	0.346482
TC0700001756.mm.2	Prkcb	0.0106282	0.194407	24	10	0.369463
TC0700003406.mm.2	Klf13	0.0106282	0.194407	24	12	0.447245
TC0700003831.mm.2	P2ry2	0.0106282	0.194407	24	12	0.251023
TC0700004095.mm.2	Sbf2	0.0106282	0.194407	24	10	0.192687
TC0800000394.mm.2	Gsr	0.0106282	0.194407	24	8	0.178544
TC0800000424.mm.2	Ppp1r3b	0.0106282	0.194407	24	20	0.936916
TC0800003177.mm.2	Exoc8	0.0106282	0.194407	24	14	0.215668
TC0900000523.mm.2	Ift46	0.0106282	0.194407	24	8	0.247487
TC0900001038.mm.2	Gclc	0.0106282	0.194407	24	8	0.468458
TC0900002421.mm.2	Senp8	0.0106282	0.194407	24	2	0.254558
TC0900003018.mm.2	Rad54l2	0.0106282	0.194407	24	12	0.378302
TC0900003342.mm.2	Syncrip	0.0106282	0.194407	24	14	0.116673
TC0X00000643.mm.2	Mamld1	0.0106282	0.194407	24	16	0.415425
TC0X00001799.mm.2	Ebp	0.0106282	0.194407	24	22	0.254558
TC0X00002433.mm.2	Bcap31	0.0106282	0.194407	24	16	0.127279
TC0X00003197.mm.2	Shroom2	0.0106282	0.194407	24	6	0.321734
TC0X00003410.mm.2	Gm15091	0.0106282	0.194407	24	2	0.194454
TC1000001621.mm.2	Mmp19	0.0106282	0.194407	24	22	0.344715
TC1000003158.mm.2	Suox	0.0106282	0.194407	24	22	0.272236
TC1100000493.mm.2	Gnb2l1; Snord96a; Snord95	0.0106282	0.194407	24	16	0.153796
TC1100001770.mm.2	Dcaf7	0.0106282	0.194407	24	8	0.258094
TC1100002134.mm.2	Znrf3	0.0106282	0.194407	24	10	0.275772
TC1100002455.mm.2	Gm17332	0.0106282	0.194407	24	0	0.675287
TC1100002871.mm.2	Tom1l2	0.0106282	0.194407	24	16	0.318198
TC1100003234.mm.2	Rph3al	0.0106282	0.194407	24	20	0.311127
TC1100003300.mm.2	Tmem97	0.0106282	0.194407	24	14	0.222739
TC1100004294.mm.2	Glod4; Gemin4	0.0106282	0.194407	24	6	0.159099
TC1200000134.mm.2	Rock2	0.0106282	0.194407	24	14	0.28461
TC1200001241.mm.2	Mark3	0.0106282	0.194407	24	12	0.270468
TC1200001344.mm.2	1110002L01Rik	0.0106282	0.194407	24	10	0.387141
TC1200001487.mm.2	Itgb1bp1	0.0106282	0.194407	24	4	0.247487
TC1200002256.mm.2	Btbd7	0.0106282	0.194407	24	8	0.231577
TC1300000181.mm.2	Hist1h2ao; Hist1h2ap; Hist1h2ai; Hist1h2ah	0.0106282	0.194407	24	20	0.410122
TC1300001561.mm.2	Hist1h3i	0.0106282	0.194407	24	20	0.615183
TC1300001565.mm.2	Hist1h2ap	0.0106282	0.194407	24	20	0.410122
TC1400000322.mm.2	Nt5dc2	0.0106282	0.194407	24	16	0.415425
TC1400000324.mm.2	Tnnc1	0.0106282	0.194407	24	20	0.318198
TC1400001058.mm.2	Siah3	0.0106282	0.194407	24	20	0.233345
TC1400001695.mm.2	Dph3	0.0106282	0.194407	24	14	0.288146
TC1400001961.mm.2	Slc35f4	0.0106282	0.194407	24	20	0.240416
TC1400002059.mm.2	Ajuba	0.0106282	0.194407	24	20	0.604576
TC1400002635.mm.2	Mycbp2	0.0106282	0.194407	24	16	0.215668
TC1500001942.mm.2	Naga	0.0106282	0.194407	24	8	0.162635
TC1500001957.mm.2	Cyp2d26	0.0106282	0.194407	24	20	0.205061
TC1600001259.mm.2	Dnm1l	0.0106282	0.194407	24	22	0.346482
TC1600002032.mm.2	Krtap21-1	0.0106282	0.194407	24	4	0.226274
TC1700000917.mm.2	Ccnd3	0.0106282	0.194407	24	16	0.434871
TC1700001451.mm.2	Igf2r	0.0106282	0.194407	24	10	0.330572
TC1700002558.mm.2	Eif2ak2	0.0106282	0.194407	24	22	0.502046
TC1800000714.mm.2	Ldlrad4	0.0106282	0.194407	24	10	0.487904
TC1900000015.mm.2	1810055G02Rik	0.0106282	0.194407	24	12	1.02354
TC1900000137.mm.2	2700081O15Rik	0.0106282	0.194407	24	2	0.236881
TC1900000344.mm.2	Abhd17b	0.0106282	0.194407	24	10	0.502046
TC1900000813.mm.2	Fam160b1	0.0106282	0.194407	24	12	0.265165
TC0100001178.mm.2	Nucks1	0.0118294	0.20749	24	18	0.392444
TC0100001367.mm.2	Apobec4	0.0118294	0.20749	24	18	0.258094
TC0100002552.mm.2	Mreg	0.0118294	0.20749	24	4	0.268701
TC0200001362.mm.2	Celf1	0.0118294	0.20749	24	16	0.254558
TC0200005023.mm.2	Blcap	0.0118294	0.20749	24	2	0.330572
TC0200005339.mm.2	Gm14434; 0610010B08Rik; Gm4724	0.0118294	0.20749	24	20	0.449013
TC0300001587.mm.2	Depdc1a	0.0118294	0.20749	24	4	0.226274
TC0300002847.mm.2	Abcd3	0.0118294	0.20749	24	10	0.176777
TC0400001038.mm.2	Leprot	0.0118294	0.20749	24	8	0.339411
TC0400003073.mm.2	Plaa	0.0118294	0.20749	24	8	0.194454
TC0400004171.mm.2	Isg15	0.0118294	0.20749	24	0	0.36416
TC0500001560.mm.2	Rfc2	0.0118294	0.20749	24	14	0.268701
TC0500001673.mm.2	Gpr146; D830046C22Rik	0.0118294	0.20749	24	8	0.311127
TC0600001371.mm.2	Slc6a12	0.0118294	0.20749	24	6	0.353553
TC0600002903.mm.2	Rad18	0.0118294	0.20749	24	16	0.268701
TC0700000733.mm.2	Zfp788	0.0118294	0.20749	24	16	0.296985
TC0700001939.mm.2	Lhpp	0.0118294	0.20749	24	12	0.464923
TC0700002615.mm.2	Rabac1	0.0118294	0.20749	24	16	0.39598
TC0700002842.mm.2	Cebpg	0.0118294	0.20749	24	14	0.339411
TC0700003088.mm.2	1700015G11Rik	0.0118294	0.20749	24	18	0.199758
TC0700003100.mm.2	Nipa2	0.0118294	0.20749	24	14	0.275772
TC0700003889.mm.2	Olfr624	0.0118294	0.20749	24	18	0.268701
TC0700004525.mm.2	Hras	0.0118294	0.20749	24	14	0.123744
TC0700004604.mm.2	Cttn	0.0118294	0.20749	24	6	0.242184
TC0800000010.mm.2	Mcoln1	0.0118294	0.20749	24	16	0.219203
TC0800000713.mm.2	Zfp930	0.0118294	0.20749	24	16	0.309359
TC0800002730.mm.2	Pllp	0.0118294	0.20749	24	16	0.293449
TC0800002735.mm.2	Dok4	0.0118294	0.20749	24	10	0.323501
TC0900001635.mm.2	Snrk	0.0118294	0.20749	24	18	0.36416
TC0900001764.mm.2	Gm17571	0.0118294	0.20749	24	4	0.254558
TC0900002503.mm.2	Hacd3	0.0118294	0.20749	24	12	0.268701
TC0900002772.mm.2	Ibtk	0.0118294	0.20749	24	8	0.217435
TC0X00000670.mm.2	Zfp185	0.0118294	0.20749	24	18	0.205061
TC0X00001634.mm.2	Phka2	0.0118294	0.20749	24	6	0.201525
TC0X00002669.mm.2	Zc4h2	0.0118294	0.20749	24	0	0.33234
TC0X00002783.mm.2	Slc16a2	0.0118294	0.20749	24	10	0.268701
TC1000002003.mm.2	Amd2	0.0118294	0.20749	24	12	0.362392
TC1100001853.mm.2	Sox9	0.0118294	0.20749	24	22	0.415425
TC1100001932.mm.2	Ubald2; Gm7367	0.0118294	0.20749	24	6	0.309359
TC1100002904.mm.2	Usp22	0.0118294	0.20749	24	14	0.219203
TC1100003787.mm.2	Stat5b	0.0118294	0.20749	24	4	0.360624
TC1100003800.mm.2	Becn1	0.0118294	0.20749	24	6	0.169706
TC1100004000.mm.2	Abca9	0.0118294	0.20749	24	16	0.196222
TC1300000182.mm.2	Hist1h4m; Hist1h4n	0.0118294	0.20749	24	18	0.53033
TC1300000202.mm.2	Vmn1r198	0.0118294	0.20749	24	6	0.406586
TC1300001564.mm.2	Hist1h4n	0.0118294	0.20749	24	18	0.53033
TC1400002608.mm.2	Klf12	0.0118294	0.20749	24	6	0.509117
TC1500000542.mm.2	Psca	0.0118294	0.20749	24	18	0.190919
TC1500002096.mm.2	Yaf2	0.0118294	0.20749	24	12	0.13435
TC1600002009.mm.2	Krtap26-1	0.0118294	0.20749	24	4	0.155563
TC1700001483.mm.2	4930474M22Rik	0.0118294	0.20749	24	2	0.272236
TSUnmapped00000030.mm.2	H60a	0.0118294	0.20749	24	0	0.289914
TC0100000027.mm.2	Pcmtd1	0.0130305	0.215294	24	10	0.183848
TC0100000829.mm.2	Dgkd	0.0130305	0.215294	24	10	0.539169
TC0100002838.mm.2	Dtymk	0.0130305	0.215294	24	18	0.438406
TC0100003891.mm.2	Ifi203	0.0130305	0.215294	24	20	0.325269
TC0200002405.mm.2	Tldc2	0.0130305	0.215294	24	4	0.0777817
TC0200002722.mm.2	Gm11007; 0610010B08Rik	0.0130305	0.215294	24	20	0.479065
TC0200002724.mm.2	Gm11007; Gm14308	0.0130305	0.215294	24	20	0.479065
TC0200003023.mm.2	H2afb1	0.0130305	0.215294	24	2	0.321734
TC0200004308.mm.2	Bbox1	0.0130305	0.215294	24	8	0.201525
TC0200004419.mm.2	A430105I19Rik	0.0130305	0.215294	24	2	0.374767
TC0200005466.mm.2	Lrrc8a	0.0130305	0.215294	24	12	0.311127
TC0300001201.mm.2	4930455H04Rik	0.0130305	0.215294	24	12	0.281075
TC0300002139.mm.2	B3galnt1	0.0130305	0.215294	24	16	0.24572
TC0400000015.mm.2	Lyn	0.0130305	0.215294	24	12	0.279307
TC0400000282.mm.2	Srsf12	0.0130305	0.215294	24	4	0.153796
TC0400002159.mm.2	Tox	0.0130305	0.215294	24	8	0.30052
TC0400003475.mm.2	Mfsd2a	0.0130305	0.215294	24	14	1.26219
TC0400003599.mm.2	Hdac1	0.0130305	0.215294	24	20	0.148492
TC0400004042.mm.2	Nmnat1	0.0130305	0.215294	24	22	0.247487
TC0500000277.mm.2	Dnajb6	0.0130305	0.215294	24	14	0.120208
TC0500000359.mm.2	Gm9903	0.0130305	0.215294	24	20	0.307591
TC0500001312.mm.2	Med13l	0.0130305	0.215294	24	10	0.289914
TC0500001578.mm.2	Baz1b	0.0130305	0.215294	24	14	0.339411
TC0500002557.mm.2	Gabrg1	0.0130305	0.215294	24	20	0.2139
TC0500003496.mm.2	Micall2	0.0130305	0.215294	24	4	0.367696
TC0600000226.mm.2	Hilpda	0.0130305	0.215294	24	0	0.226274
TC0600001052.mm.2	Vmn1r40	0.0130305	0.215294	24	0	0.275772
TC0600001294.mm.2	Zfand4	0.0130305	0.215294	24	4	0.263397
TC0600001317.mm.2	Gm7292	0.0130305	0.215294	24	6	0.240416
TC0600002745.mm.2	Prickle2	0.0130305	0.215294	24	14	0.123744
TC0700001118.mm.2	Acan	0.0130305	0.215294	24	6	0.36416
TC0700004135.mm.2	Psma1	0.0130305	0.215294	24	8	0.180312
TC0700004148.mm.2	Sox6	0.0130305	0.215294	24	8	0.464923
TC0800000353.mm.2	Eif4ebp1	0.0130305	0.215294	24	12	0.410122
TC0800000932.mm.2	Ddx39	0.0130305	0.215294	24	14	0.190919
TC0800001599.mm.2	Itgb1	0.0130305	0.215294	24	10	0.274004
TC0800002385.mm.2	Rfxank	0.0130305	0.215294	24	0	0.399515
TC0800002702.mm.2	Ces1d	0.0130305	0.215294	24	12	0.249255
TC0900000100.mm.2	Sesn3	0.0130305	0.215294	24	6	0.318198
TC0900000223.mm.2	Bbs9	0.0130305	0.215294	24	14	0.275772
TC0900000923.mm.2	Gtf2a2	0.0130305	0.215294	24	12	0.410122
TC0900001042.mm.2	Elovl5	0.0130305	0.215294	24	2	0.388909
TC0900001422.mm.2	Ip6k2	0.0130305	0.215294	24	8	0.751301
TC0900001507.mm.2	Ubp1	0.0130305	0.215294	24	12	0.219203
TC0900002308.mm.2	Cul5	0.0130305	0.215294	24	8	0.130815
TC0900002738.mm.2	Tmem30a	0.0130305	0.215294	24	6	0.120208
TC0X00000216.mm.2	Araf	0.0130305	0.215294	24	6	0.185616
TC0X00000700.mm.2	Opn1mw	0.0130305	0.215294	24	18	0.258094
TC0Y00000566.mm.2	Gm20854	0.0130305	0.215294	24	8	0.601041
TC1000000802.mm.2	Vmn2r80	0.0130305	0.215294	24	22	0.374767
TC1000000884.mm.2	Eef2	0.0130305	0.215294	24	14	0.13435
TC1100000286.mm.2	Pnpt1	0.0130305	0.215294	24	0	0.208597
TC1100000959.mm.2	4930544D05Rik	0.0130305	0.215294	24	4	0.176777
TC1100001389.mm.2	Gm525	0.0130305	0.215294	24	6	0.424264
TC1100001813.mm.2	Apoh	0.0130305	0.215294	24	8	0.176777
TC1100002251.mm.2	Pno1	0.0130305	0.215294	24	18	0.403051
TC1100004173.mm.2	Cbx4	0.0130305	0.215294	24	20	0.4278
TC1200000037.mm.2	BC068281	0.0130305	0.215294	24	18	0.420729
TC1200000988.mm.2	Tdp1	0.0130305	0.215294	24	18	0.457852
TC1200001243.mm.2	Trmt61a	0.0130305	0.215294	24	16	0.311127
TC1200001549.mm.2	Rnf144a	0.0130305	0.215294	24	2	0.544472
TC1200001921.mm.2	Tmem30b	0.0130305	0.215294	24	8	0.228042
TC1300000187.mm.2	Pom121l2	0.0130305	0.215294	24	12	0.190919
TC1300001378.mm.2	Akr1c12	0.0130305	0.215294	24	12	0.350018
TC1300002096.mm.2	Gkap1	0.0130305	0.215294	24	10	0.311127
TC1400000494.mm.2	Gm1821	0.0130305	0.215294	24	10	0.205061
TC1400000553.mm.2	Olfr736	0.0130305	0.215294	24	20	0.219203
TC1400000596.mm.2	Tppp2	0.0130305	0.215294	24	20	0.289914
TC1400000614.mm.2	Olfr1509	0.0130305	0.215294	24	2	0.160867
TC1500000248.mm.2	Vps13b	0.0130305	0.215294	24	10	0.19799
TC1500001047.mm.2	Letmd1	0.0130305	0.215294	24	20	0.199758
TC1600000424.mm.2	Pigz	0.0130305	0.215294	24	14	0.346482
TC1600000452.mm.2	Fyttd1	0.0130305	0.215294	24	10	0.26163
TC1800000098.mm.2	Riok3	0.0130305	0.215294	24	14	0.183848
TC1800000771.mm.2	Mex3c	0.0130305	0.215294	24	10	0.242184
TC1800001274.mm.2	Spink1	0.0130305	0.215294	24	4	0.49851
TC1900000552.mm.2	Plce1	0.0130305	0.215294	24	18	0.254558
TSUnmapped00000026.mm.2	Rbm4	0.0130305	0.215294	24	16	0.353553
TC0100000706.mm.2	Col4a3	0.0144675	0.226243	24	6	0.95813
TC0100002038.mm.2	Tram2	0.0144675	0.226243	24	12	0.222739
TC0100003051.mm.2	Mapkapk2	0.0144675	0.226243	24	14	0.199758
TC0100003272.mm.2	Lamc2	0.0144675	0.226243	24	4	0.339411
TC0200000222.mm.2	Il15ra	0.0144675	0.226243	24	10	0.450781
TC0200001189.mm.2	Zfp804a	0.0144675	0.226243	24	18	0.19799
TC0200002148.mm.2	Zfp133-ps; Gm38402	0.0144675	0.226243	24	4	0.36416
TC0200002177.mm.2	Kiz	0.0144675	0.226243	24	10	0.381838
TC0200002587.mm.2	Slc9a8	0.0144675	0.226243	24	12	0.233345
TC0200003917.mm.2	Olfr1043	0.0144675	0.226243	24	4	0.39598
TC0200004253.mm.2	Eif3m	0.0144675	0.226243	24	18	0.247487
TC0200004537.mm.2	Atp8b4	0.0144675	0.226243	24	16	0.355321
TC0200004932.mm.2	Commd7	0.0144675	0.226243	24	2	0.275772
TC0200005360.mm.2	Gm14410; Gm14411; Gm14413	0.0144675	0.226243	24	20	0.505581
TC0300000091.mm.2	E2f5	0.0144675	0.226243	24	14	0.159099
TC0300001173.mm.2	Col11a1	0.0144675	0.226243	24	4	0.26163
TC0400002244.mm.2	Decr1	0.0144675	0.226243	24	12	0.249255
TC0400002578.mm.2	Slc25a51	0.0144675	0.226243	24	16	0.441942
TC0400002977.mm.2	Haus6	0.0144675	0.226243	24	14	0.252791
TC0400003382.mm.2	Artn	0.0144675	0.226243	24	10	0.272236
TC0500000289.mm.2	Ept1	0.0144675	0.226243	24	2	0.339411
TC0500000319.mm.2	Gckr	0.0144675	0.226243	24	2	0.33234
TC0500000580.mm.2	G6pd2	0.0144675	0.226243	24	4	0.410122
TC0500001110.mm.2	Tmem175	0.0144675	0.226243	24	18	0.339411
TC0500002758.mm.2	Nup54	0.0144675	0.226243	24	14	0.289914
TC0500003550.mm.2	Spdye4a	0.0144675	0.226243	24	4	0.247487
TC0600000926.mm.2	Slc4a5	0.0144675	0.226243	24	14	0.226274
TC0600003003.mm.2	Ankrd26	0.0144675	0.226243	24	14	0.236881
TC0700001325.mm.2	Fam181b	0.0144675	0.226243	24	2	0.120208
TC0700002186.mm.2	Rasl2-9	0.0144675	0.226243	24	4	0.208597
TC0700002972.mm.2	Myh14	0.0144675	0.226243	24	8	0.293449
TC0700004065.mm.2	Nlrp10	0.0144675	0.226243	24	2	0.176777
TC0700004610.mm.2	Ccnd1; Mir3962	0.0144675	0.226243	24	14	0.707107
TC0700004618.mm.2	Numbl	0.0144675	0.226243	24	6	0.388909
TC0800000039.mm.2	Zfp958	0.0144675	0.226243	24	18	0.365928
TC0800000790.mm.2	Mrpl34	0.0144675	0.226243	24	20	0.351786
TC0900000358.mm.2	Tmem218	0.0144675	0.226243	24	2	0.602809
TC0900000531.mm.2	Mpzl2	0.0144675	0.226243	24	18	0.304056
TC0900001440.mm.2	Spink8	0.0144675	0.226243	24	4	0.201525
TC0900001621.mm.2	Vipr1	0.0144675	0.226243	24	16	0.155563
TC0900003334.mm.2	Acad11	0.0144675	0.226243	24	12	0.304056
TC0X00000650.mm.2	Mtmr1	0.0144675	0.226243	24	8	0.282843
TC0X00001413.mm.2	Pak3	0.0144675	0.226243	24	2	0.318198
TC0X00001629.mm.2	Map3k15	0.0144675	0.226243	24	10	0.268701
TC0X00002416.mm.2	Pnma5	0.0144675	0.226243	24	4	0.277539
TC1000000430.mm.2	Hace1	0.0144675	0.226243	24	6	0.487904
TC1000001031.mm.2	Btbd11	0.0144675	0.226243	24	12	0.399515
TC1000003078.mm.2	Slc16a7	0.0144675	0.226243	24	14	0.579828
TC1100001841.mm.2	Map2k6	0.0144675	0.226243	24	16	0.413657
TC1100002364.mm.2	Ahsa2	0.0144675	0.226243	24	18	0.503814
TC1100002512.mm.2	Wwc1	0.0144675	0.226243	24	12	0.19799
TC1100003069.mm.2	Nlgn2	0.0144675	0.226243	24	16	0.420729
TC1100003146.mm.2	Spns2	0.0144675	0.226243	24	22	0.579828
TC1100004164.mm.2	Rbfox3	0.0144675	0.226243	24	2	0.353553
TC1100004254.mm.2	Zfp750	0.0144675	0.226243	24	12	0.381838
TC1200001725.mm.2	Heatr5a	0.0144675	0.226243	24	16	0.399515
TC1200001953.mm.2	Sptb	0.0144675	0.226243	24	10	0.296985
TC1300000675.mm.2	Pcbd2	0.0144675	0.226243	24	16	0.215668
TC1300001666.mm.2	Gmnn	0.0144675	0.226243	24	12	0.433103
TC1300002240.mm.2	Zfp708; Rslcan18	0.0144675	0.226243	24	16	0.26163
TC1400001914.mm.2	Bmp4	0.0144675	0.226243	24	18	0.311127
TC1400002080.mm.2	Ap1g2	0.0144675	0.226243	24	12	0.351786
TC1400002100.mm.2	Dhrs1	0.0144675	0.226243	24	18	0.410122
TC1400002834.mm.2	Irf9	0.0144675	0.226243	24	22	0.358857
TC1600001218.mm.2	Cpped1	0.0144675	0.226243	24	4	0.233345
TC1600001556.mm.2	Parp14	0.0144675	0.226243	24	22	0.350018
TC1700001191.mm.2	Cebpzos	0.0144675	0.226243	24	22	0.351786
TC1700001677.mm.2	Fam195a	0.0144675	0.226243	24	18	0.44371
TC1700002315.mm.2	Lrg1	0.0144675	0.226243	24	22	0.381838
TC1800000092.mm.2	Rbbp8	0.0144675	0.226243	24	14	0.219203
TC1800000232.mm.2	Pik3c3	0.0144675	0.226243	24	6	0.208597
TC1800001220.mm.2	Hdac3	0.0144675	0.226243	24	8	0.141421
TC1900000517.mm.2	Pcgf5	0.0144675	0.226243	24	16	0.296985
TC1900000661.mm.2	Peo1	0.0144675	0.226243	24	20	0.304056
TC1900000806.mm.2	Adrb1	0.0144675	0.226243	24	10	0.219203
TC1900001622.mm.2	Calhm2	0.0144675	0.226243	24	14	0.247487
TC0100001245.mm.2	Arl8a	0.0159045	0.238633	24	10	0.424264
TC0100001579.mm.2	Nr1i3	0.0159045	0.238633	24	14	0.551543
TC0100001581.mm.2	Adamts4	0.0159045	0.238633	24	2	0.242184
TC0100002118.mm.2	Phf3	0.0159045	0.238633	24	8	0.144957
TC0100002793.mm.2	Rab17	0.0159045	0.238633	24	4	0.438406
TC0200000274.mm.2	Plxdc2	0.0159045	0.238633	24	14	0.219203
TC0200005365.mm.2	Gm14418	0.0159045	0.238633	24	18	0.30052
TC0300000494.mm.2	Arhgef26	0.0159045	0.238633	24	10	0.312895
TC0300001547.mm.2	Asb17	0.0159045	0.238633	24	0	0.39598
TC0300002445.mm.2	Snx27	0.0159045	0.238633	24	6	0.240416
TC0300002815.mm.2	Palmd	0.0159045	0.238633	24	8	0.417193
TC0300003016.mm.2	Mttp	0.0159045	0.238633	24	14	0.180312
TC0400000052.mm.2	Rab2a	0.0159045	0.238633	24	8	0.162635
TC0400000459.mm.2	Ccin	0.0159045	0.238633	24	18	0.148492
TC0400001863.mm.2	Smarca5-ps	0.0159045	0.238633	24	10	0.173241
TC0400002290.mm.2	Tstd3	0.0159045	0.238633	24	6	0.353553
TC0400002513.mm.2	Vcp	0.0159045	0.238633	24	10	0.222739
TC0500002953.mm.2	Slc26a1	0.0159045	0.238633	24	18	0.169706
TC0500003329.mm.2	Auts2	0.0159045	0.238633	24	10	0.236881
TC0600000694.mm.2	Vmn1r19	0.0159045	0.238633	24	4	0.383605
TC0600002114.mm.2	Parp12	0.0159045	0.238633	24	2	0.489671
TC0600002728.mm.2	Chchd4	0.0159045	0.238633	24	14	0.175009
TC0700000169.mm.2	Sult2a2	0.0159045	0.238633	24	16	0.558614
TC0700000424.mm.2	Tgfb1	0.0159045	0.238633	24	10	0.339411
TC0700001754.mm.2	Chp2	0.0159045	0.238633	24	2	0.268701
TC0700002412.mm.2	Obox6	0.0159045	0.238633	24	2	0.224506
TC0700002659.mm.2	Snrpa	0.0159045	0.238633	24	20	0.431335
TC0700003710.mm.2	Tmem135	0.0159045	0.238633	24	6	0.268701
TC0800000483.mm.2	Pdgfrl	0.0159045	0.238633	24	12	0.282843
TC0800002066.mm.2	Dlc1	0.0159045	0.238633	24	6	0.259862
TC0800002552.mm.2	Scoc	0.0159045	0.238633	24	22	0.314663
TC0900000363.mm.2	Hepacam	0.0159045	0.238633	24	10	0.143189
TC0900000699.mm.2	Trcg1	0.0159045	0.238633	24	4	0.205061
TC0900001834.mm.2	Zfp560	0.0159045	0.238633	24	8	0.314663
TC0900002778.mm.2	Gm17530	0.0159045	0.238633	24	20	1.6617
TC0X00002292.mm.2	Fgf13	0.0159045	0.238633	24	20	0.307591
TC0X00002448.mm.2	Dnase1l1	0.0159045	0.238633	24	16	0.314663
TC1000002759.mm.2	Phxr2	0.0159045	0.238633	24	6	0.360624
TC1000003140.mm.2	Coq10a	0.0159045	0.238633	24	8	0.187383
TC1100000048.mm.2	Ascc2	0.0159045	0.238633	24	10	0.176777
TC1100002224.mm.2	Fignl1	0.0159045	0.238633	24	20	0.441942
TC1100002920.mm.2	Prpsap2	0.0159045	0.238633	24	20	0.173241
TC1100003076.mm.2	Eif5a	0.0159045	0.238633	24	18	0.148492
TC1100003652.mm.2	Pip4k2b	0.0159045	0.238633	24	18	0.33234
TC1300000383.mm.2	Nqo2	0.0159045	0.238633	24	4	0.19799
TC1400000448.mm.2	Gm6526	0.0159045	0.238633	24	0	0.39598
TC1400000851.mm.2	Spata13	0.0159045	0.238633	24	8	0.339411
TC1400001070.mm.2	Tsc22d1	0.0159045	0.238633	24	22	0.844993
TC1400001306.mm.2	Rap2a	0.0159045	0.238633	24	16	0.381838
TC1400001674.mm.2	Dnah1	0.0159045	0.238633	24	22	0.318198
TC1500000313.mm.2	9330182O14Rik	0.0159045	0.238633	24	0	0.323501
TC1500002071.mm.2	Kif21a	0.0159045	0.238633	24	14	0.176777
TC1500002151.mm.2	Amigo2	0.0159045	0.238633	24	12	0.222739
TC1500002288.mm.2	Itgb7	0.0159045	0.238633	24	8	0.233345
TC1600000988.mm.2	Mrap	0.0159045	0.238633	24	0	0.558614
TC1600001079.mm.2	Wrb	0.0159045	0.238633	24	2	0.208597
TC1700001163.mm.2	Ttc27	0.0159045	0.238633	24	10	0.222739
TC1700001209.mm.2	Galm	0.0159045	0.238633	24	18	0.190919
TC1800000802.mm.2	Dym	0.0159045	0.238633	24	14	0.371231
TC1900000017.mm.2	Suv420h1	0.0159045	0.238633	24	8	0.240416
TC0100000971.mm.2	Gin1	0.0176162	0.252867	24	12	0.53033
TC0100001369.mm.2	Arpc5	0.0176162	0.252867	24	12	0.226274
TC0100003620.mm.2	Cep170	0.0176162	0.252867	24	14	0.169706
TC0200000306.mm.2	4930426L09Rik	0.0176162	0.252867	24	22	0.371231
TC0200000482.mm.2	Mrps2	0.0176162	0.252867	24	20	0.201525
TC0200000603.mm.2	Angptl2	0.0176162	0.252867	24	14	0.445477
TC0200001125.mm.2	Rbm45	0.0176162	0.252867	24	2	0.233345
TC0200001134.mm.2	Plekha3	0.0176162	0.252867	24	14	0.222739
TC0200002844.mm.2	Rpp38	0.0176162	0.252867	24	18	0.586899
TC0200004000.mm.2	Olfr1157	0.0176162	0.252867	24	0	0.309359
TC0200004141.mm.2	Slc35c1	0.0176162	0.252867	24	18	0.266933
TC0200004165.mm.2	Accsl	0.0176162	0.252867	24	0	0.235113
TC0200004589.mm.2	Gm10762	0.0176162	0.252867	24	8	0.0954594
TC0200005220.mm.2	Atp9a	0.0176162	0.252867	24	16	0.325269
TC0300000159.mm.2	Nceh1	0.0176162	0.252867	24	10	0.79196
TC0300002413.mm.2	Lce1l	0.0176162	0.252867	24	0	0.279307
TC0300002491.mm.2	Car14	0.0176162	0.252867	24	22	0.654074
TC0300002955.mm.2	Hadh	0.0176162	0.252867	24	12	0.180312
TC0400003379.mm.2	Atp6v0b	0.0176162	0.252867	24	14	0.360624
TC0400004145.mm.2	Gm10563	0.0176162	0.252867	24	10	0.187383
TC0500003369.mm.2	Gtf2i	0.0176162	0.252867	24	10	0.13435
TC0500003472.mm.2	Mcm7; Mir93; Mir25	0.0176162	0.252867	24	18	0.410122
TC0500003645.mm.2	Katnal1; 5930430L01Rik	0.0176162	0.252867	24	20	0.456084
TC0600001229.mm.2	Lmcd1	0.0176162	0.252867	24	2	0.226274
TC0600002067.mm.2	Fam180a	0.0176162	0.252867	24	14	0.417193
TC0700000827.mm.2	Nosip	0.0176162	0.252867	24	10	0.406586
TC0700001374.mm.2	Wnt11	0.0176162	0.252867	24	18	0.162635
TC0700004221.mm.2	Gga2	0.0176162	0.252867	24	20	0.148492
TC0700004626.mm.2	Sez6l2	0.0176162	0.252867	24	4	0.367696
TC0800000937.mm.2	Asf1b	0.0176162	0.252867	24	18	0.399515
TC0800001255.mm.2	Cdh1	0.0176162	0.252867	24	2	0.502046
TC0800002404.mm.2	Pik3r2	0.0176162	0.252867	24	6	0.296985
TC0800002734.mm.2	Ciapin1	0.0176162	0.252867	24	20	0.26163
TC0800003024.mm.2	Hsdl1	0.0176162	0.252867	24	16	0.282843
TC0900000458.mm.2	Hspa8	0.0176162	0.252867	24	18	0.296985
TC0900001822.mm.2	Olfr854	0.0176162	0.252867	24	18	0.33234
TC0900002790.mm.2	Cep162	0.0176162	0.252867	24	10	0.279307
TC0X00000504.mm.2	Gm14625	0.0176162	0.252867	24	2	0.270468
TC1000001647.mm.2	Olfr794	0.0176162	0.252867	24	16	0.374767
TC1000002668.mm.2	Slc25a3	0.0176162	0.252867	24	18	0.137886
TC1100000205.mm.2	Peli1	0.0176162	0.252867	24	8	0.183848
TC1100000606.mm.2	Gm9945	0.0176162	0.252867	24	10	0.208597
TC1100000674.mm.2	Larp1	0.0176162	0.252867	24	2	0.307591
TC1100001267.mm.2	Wfdc21	0.0176162	0.252867	24	22	0.113137
TC1100001537.mm.2	Socs7	0.0176162	0.252867	24	10	0.692965
TC1100001580.mm.2	Thra	0.0176162	0.252867	24	2	0.240416
TC1100001677.mm.2	Cd300lg	0.0176162	0.252867	24	18	0.357089
TC1200001225.mm.2	Rcor1	0.0176162	0.252867	24	6	0.206829
TC1200001289.mm.2	Adam6a	0.0176162	0.252867	24	10	0.330572
TC1200001813.mm.2	Sec23a	0.0176162	0.252867	24	12	0.275772
TC1300000260.mm.2	Hist1h2ab	0.0176162	0.252867	24	18	0.371231
TC1300001190.mm.2	Dimt1	0.0176162	0.252867	24	18	0.355321
TC1300002437.mm.2	Bhmt2	0.0176162	0.252867	24	0	0.291682
TC1400000950.mm.2	Gm5464	0.0176162	0.252867	24	2	0.189151
TC1400002738.mm.2	Slc15a1	0.0176162	0.252867	24	2	0.312895
TC1500000719.mm.2	Xpnpep3	0.0176162	0.252867	24	16	0.54624
TC1500001982.mm.2	Sult4a1	0.0176162	0.252867	24	22	0.601041
TC1500002052.mm.2	Sco2; Tymp	0.0176162	0.252867	24	0	0.51442
TC1700000484.mm.2	Mapk14	0.0176162	0.252867	24	18	0.233345
TC1700002132.mm.2	Slc25a27	0.0176162	0.252867	24	10	0.417193
TC1700002418.mm.2	Twsg1	0.0176162	0.252867	24	12	0.282843
TC1800000509.mm.2	Hsd17b4	0.0176162	0.252867	24	14	0.231577
TC1800001401.mm.2	Myoz3	0.0176162	0.252867	24	2	0.162635
TC1800001429.mm.2	Grpel2	0.0176162	0.252867	24	8	0.212132
TC1900000064.mm.2	4930481A15Rik	0.0176162	0.252867	24	8	0.49851
TC1900001031.mm.2	Stip1	0.0176162	0.252867	24	20	0.735391
TC1900001705.mm.2	Dclre1a	0.0176162	0.252867	24	14	0.374767
TC0100002187.mm.2	Sema4c	0.0193278	0.263794	24	4	0.226274
TC0100003203.mm.2	Trove2	0.0193278	0.263794	24	16	0.392444
TC0100003683.mm.2	Wdr26	0.0193278	0.263794	24	8	0.233345
TC0200000492.mm.2	Ak8	0.0193278	0.263794	24	2	0.247487
TC0200000572.mm.2	Pomt1	0.0193278	0.263794	24	22	0.157331
TC0200003505.mm.2	Mmadhc	0.0193278	0.263794	24	10	0.339411
TC0200004352.mm.2	Emc4	0.0193278	0.263794	24	16	0.106066
TC0300002473.mm.2	Anxa9	0.0193278	0.263794	24	22	0.289914
TC0400001728.mm.2	Camk2n1	0.0193278	0.263794	24	18	0.286378
TC0400002151.mm.2	Cyp7a1	0.0193278	0.263794	24	12	0.351786
TC0400003383.mm.2	St3gal3	0.0193278	0.263794	24	8	0.247487
TC0400003545.mm.2	Ago4	0.0193278	0.263794	24	6	0.268701
TC0500000934.mm.2	Bmp2k	0.0193278	0.263794	24	14	0.187383
TC0500001079.mm.2	A830010M20Rik; 1700028K03Rik	0.0193278	0.263794	24	4	0.611647
TC0500001170.mm.2	Gm26897	0.0193278	0.263794	24	4	0.376534
TC0500002037.mm.2	Orc5; Gm15421	0.0193278	0.263794	24	18	0.311127
TC0500002186.mm.2	Supt7l	0.0193278	0.263794	24	22	0.187383
TC0500002533.mm.2	Gm21905	0.0193278	0.263794	24	2	0.289914
TC0500003395.mm.2	Hip1	0.0193278	0.263794	24	20	0.392444
TC0500003603.mm.2	Gm5565	0.0193278	0.263794	24	12	0.233345
TC0600000678.mm.2	Fkbp9	0.0193278	0.263794	24	16	0.169706
TC0600001352.mm.2	Cecr2	0.0193278	0.263794	24	4	0.272236
TC0600002326.mm.2	Inmt	0.0193278	0.263794	24	16	1.0695
TC0600003611.mm.2	Klra9	0.0193278	0.263794	24	10	0.296985
TC0700001145.mm.2	Sema4b	0.0193278	0.263794	24	6	0.256326
TC0700001250.mm.2	Vmn2r79	0.0193278	0.263794	24	2	0.342947
TC0700001827.mm.2	Cdipt	0.0193278	0.263794	24	16	0.176777
TC0700002507.mm.2	Pvr	0.0193278	0.263794	24	14	0.265165
TC0700003017.mm.2	Sphk2	0.0193278	0.263794	24	4	0.378302
TC0700004052.mm.2	Olfr488	0.0193278	0.263794	24	6	0.19799
TC0700004287.mm.2	Il27	0.0193278	0.263794	24	10	0.19799
TC0700004617.mm.2	Adck4	0.0193278	0.263794	24	8	0.388909
TC0800000416.mm.2	Dusp4	0.0193278	0.263794	24	18	0.272236
TC0800000991.mm.2	Gpt2	0.0193278	0.263794	24	14	0.325269
TC0800002745.mm.2	Csnk2a2	0.0193278	0.263794	24	10	0.289914
TC0800003175.mm.2	Fam89a	0.0193278	0.263794	24	4	0.319966
TC0900000667.mm.2	Psma4	0.0193278	0.263794	24	8	0.113137
TC0900003013.mm.2	Iqcf3	0.0193278	0.263794	24	0	0.489671
TC0900003051.mm.2	Apeh	0.0193278	0.263794	24	16	0.13435
TC0900003268.mm.2	Lyzl4	0.0193278	0.263794	24	10	0.187383
TC0X00001502.mm.2	Pfkfb1	0.0193278	0.263794	24	18	0.342947
TC1000000730.mm.2	Vpreb3	0.0193278	0.263794	24	16	0.429567
TC1000002702.mm.2	Vezt; Mir331	0.0193278	0.263794	24	8	0.258094
TC1100000112.mm.2	Igfbp1	0.0193278	0.263794	24	8	1.9799
TC1100001722.mm.2	Arf2	0.0193278	0.263794	24	14	0.190919
TC1100003836.mm.2	Slc25a39	0.0193278	0.263794	24	18	0.236881
TC1100004144.mm.2	Tmc6	0.0193278	0.263794	24	12	0.304056
TC1100004270.mm.2	Tlcd2	0.0193278	0.263794	24	0	0.335876
TC1200000016.mm.2	Dnmt3a	0.0193278	0.263794	24	8	0.210364
TC1200001638.mm.2	Ahr	0.0193278	0.263794	24	12	0.410122
TC1200002115.mm.2	Pomt2	0.0193278	0.263794	24	18	0.307591
TC1300000839.mm.2	1700001L19Rik	0.0193278	0.263794	24	4	0.187383
TC1300001209.mm.2	Pde4d; Mir1904	0.0193278	0.263794	24	10	0.33234
TC1300001270.mm.2	Plpp1	0.0193278	0.263794	24	2	0.374767
TC1300001759.mm.2	Mylk4	0.0193278	0.263794	24	2	0.440174
TC1300001784.mm.2	Slc22a23	0.0193278	0.263794	24	10	0.247487
TC1300002435.mm.2	Jmy	0.0193278	0.263794	24	8	0.265165
TC1400000891.mm.2	Defb43	0.0193278	0.263794	24	2	0.16617
TC1400001621.mm.2	Slmap	0.0193278	0.263794	24	10	0.353553
TC1400001627.mm.2	Appl1	0.0193278	0.263794	24	2	0.487904
TC1400002217.mm.2	Gata4	0.0193278	0.263794	24	22	0.258094
TC1400002524.mm.2	Gm10110	0.0193278	0.263794	24	14	0.259862
TC1500000034.mm.2	C9	0.0193278	0.263794	24	20	0.551543
TC1500000821.mm.2	Ppara	0.0193278	0.263794	24	12	0.738927
TC1600000439.mm.2	Ubxn7	0.0193278	0.263794	24	6	0.367696
TC1600000788.mm.2	Pros1	0.0193278	0.263794	24	14	0.265165
TC1600001154.mm.2	Ppl	0.0193278	0.263794	24	14	0.251023
TC1600001395.mm.2	Masp1	0.0193278	0.263794	24	10	0.130815
TC1600001553.mm.2	Dirc2	0.0193278	0.263794	24	10	0.4278
TC1600001604.mm.2	Pla1a	0.0193278	0.263794	24	6	0.215668
TC1600001782.mm.2	Olfr176; Olfr177	0.0193278	0.263794	24	6	0.304056
TC1600002012.mm.2	Krtap13	0.0193278	0.263794	24	0	0.247487
TC1700000344.mm.2	Pkd1	0.0193278	0.263794	24	10	0.335876
TC1700002562.mm.2	Prkd3	0.0193278	0.263794	24	8	0.418961
TC1700002571.mm.2	Cyp1b1	0.0193278	0.263794	24	6	0.226274
TC1800000006.mm.2	Cul2	0.0193278	0.263794	24	20	0.357089
TC1800001437.mm.2	Adrb2	0.0193278	0.263794	24	12	0.487904
TC1900000607.mm.2	4933411K16Rik; Hoga1	0.0193278	0.263794	24	12	0.275772
TC1900000960.mm.2	Banf1	0.0193278	0.263794	24	20	0.381838
TC1900000983.mm.2	Scyl1	0.0193278	0.263794	24	8	0.247487
TC0100000045.mm.2	Mcmdc2	0.0213577	0.276704	24	8	0.367696
TC0100000092.mm.2	Terf1	0.0213577	0.276704	24	8	0.233345
TC0100000112.mm.2	Pi15	0.0213577	0.276704	24	12	0.236881
TC0100001502.mm.2	Nme7	0.0213577	0.276704	24	6	0.279307
TC0100001877.mm.2	Plxna2	0.0213577	0.276704	24	16	0.272236
TC0100002764.mm.2	Ngef	0.0213577	0.276704	24	12	0.311127
TC0100003401.mm.2	Fmo1	0.0213577	0.276704	24	16	0.159099
TC0200000055.mm.2	Nudt5	0.0213577	0.276704	24	12	0.268701
TC0200000302.mm.2	Bmi1	0.0213577	0.276704	24	14	0.293449
TC0200000477.mm.2	Rxra	0.0213577	0.276704	24	12	0.293449
TC0200001664.mm.2	Katnbl1; Slc12a6	0.0213577	0.276704	24	2	0.240416
TC0200002731.mm.2	Gm2026	0.0213577	0.276704	24	20	0.371231
TC0200004608.mm.2	Pdyn	0.0213577	0.276704	24	4	0.289914
TC0200004974.mm.2	Fam83c	0.0213577	0.276704	24	22	0.13435
TC0200005481.mm.2	Serf2	0.0213577	0.276704	24	20	0.215668
TC0300000054.mm.2	Zbtb10	0.0213577	0.276704	24	8	0.219203
TC0300000500.mm.2	Mme	0.0213577	0.276704	24	18	0.436638
TC0300000736.mm.2	Rit1	0.0213577	0.276704	24	8	0.208597
TC0300002306.mm.2	Tmem79	0.0213577	0.276704	24	10	0.243952
TC0300002946.mm.2	Rpl34; Rpl34-ps1	0.0213577	0.276704	24	16	0.208597
TC0300003170.mm.2	Rabggtb; Snord45c	0.0213577	0.276704	24	8	0.18208
TC0400002945.mm.2	Ttc39b	0.0213577	0.276704	24	8	0.236881
TC0400003685.mm.2	Stx12	0.0213577	0.276704	24	10	0.233345
TC0400003810.mm.2	Ldlrad2	0.0213577	0.276704	24	6	0.413657
TC0400003839.mm.2	Htr6	0.0213577	0.276704	24	4	0.0777817
TC0500000054.mm.2	Abcb4	0.0213577	0.276704	24	12	0.452548
TC0500000533.mm.2	Zcchc4	0.0213577	0.276704	24	18	0.399515
TC0500003596.mm.2	Cyp3a16	0.0213577	0.276704	24	8	0.484368
TC0600001259.mm.2	Tatdn2	0.0213577	0.276704	24	14	0.183848
TC0600001768.mm.2	Mettl20	0.0213577	0.276704	24	12	0.480833
TC0600002472.mm.2	Kdm3a	0.0213577	0.276704	24	6	0.486136
TC0600003284.mm.2	A630073D07Rik	0.0213577	0.276704	24	20	0.330572
TC0700000978.mm.2	Mtmr10	0.0213577	0.276704	24	12	0.325269
TC0700001116.mm.2	Isg20	0.0213577	0.276704	24	22	0.371231
TC0700001408.mm.2	Ucp3	0.0213577	0.276704	24	10	0.19799
TC0700001947.mm.2	Edrf1	0.0213577	0.276704	24	14	0.296985
TC0700002053.mm.2	Pnpla2	0.0213577	0.276704	24	10	0.510885
TC0700002784.mm.2	Usf2	0.0213577	0.276704	24	8	0.275772
TC0700004076.mm.2	St5	0.0213577	0.276704	24	2	0.643467
TC0700004553.mm.2	Dusp8	0.0213577	0.276704	24	14	0.39598
TC0700004628.mm.2	Prr14	0.0213577	0.276704	24	4	0.190919
TC0800000261.mm.2	Defb2	0.0213577	0.276704	24	4	0.268701
TC0800001917.mm.2	Ddhd2	0.0213577	0.276704	24	18	0.235113
TC0800002412.mm.2	Rpl18a	0.0213577	0.276704	24	16	0.22981
TC0800002811.mm.2	B3gnt9	0.0213577	0.276704	24	8	0.201525
TC0900000573.mm.2	Cadm1	0.0213577	0.276704	24	16	0.296985
TC0900000922.mm.2	Bnip2	0.0213577	0.276704	24	16	0.205061
TC0900001128.mm.2	Nt5e	0.0213577	0.276704	24	0	0.190919
TC0900001475.mm.2	Als2cl	0.0213577	0.276704	24	22	0.275772
TC0X00001371.mm.2	Rnf128	0.0213577	0.276704	24	10	0.30052
TC0X00002446.mm.2	Tex28	0.0213577	0.276704	24	22	0.189151
TC0X00003032.mm.2	Kir3dl2	0.0213577	0.276704	24	6	0.302288
TC1000000413.mm.2	Atg5	0.0213577	0.276704	24	6	0.226274
TC1000000831.mm.2	Grin3b	0.0213577	0.276704	24	0	0.293449
TC1000002487.mm.2	Tmem259	0.0213577	0.276704	24	10	0.176777
TC1000002766.mm.2	Csl	0.0213577	0.276704	24	2	0.233345
TC1100000428.mm.2	Ccnjl	0.0213577	0.276704	24	0	0.350018
TC1100000565.mm.2	Clk4	0.0213577	0.276704	24	12	0.304056
TC1100000701.mm.2	Olfr315	0.0213577	0.276704	24	2	0.219203
TC1100002862.mm.2	Flcn	0.0213577	0.276704	24	8	0.270468
TC1100003274.mm.2	Gm10277	0.0213577	0.276704	24	6	0.381838
TC1100003593.mm.2	Ngfr	0.0213577	0.276704	24	2	0.175009
TC1100003945.mm.2	Nol11	0.0213577	0.276704	24	20	0.325269
TC1100003948.mm.2	Pitpnc1	0.0213577	0.276704	24	14	0.311127
TC1100004207.mm.2	Oxld1	0.0213577	0.276704	24	0	0.30052
TC1200000280.mm.2	Gdap10	0.0213577	0.276704	24	14	0.629325
TC1200001797.mm.2	Slc25a21	0.0213577	0.276704	24	4	0.286378
TC1200001993.mm.2	Dcaf5	0.0213577	0.276704	24	8	0.183848
TC1300000815.mm.2	Ptdss1	0.0213577	0.276704	24	16	0.148492
TC1300001131.mm.2	Mrps27	0.0213577	0.276704	24	20	0.357089
TC1300001575.mm.2	Hist1h4i	0.0213577	0.276704	24	18	0.533866
TC1300001859.mm.2	Elovl2	0.0213577	0.276704	24	12	0.220971
TC1300002001.mm.2	Gm15440	0.0213577	0.276704	24	4	0.205061
TC1400000587.mm.2	Vmn2r88	0.0213577	0.276704	24	22	0.438406
TC1400000797.mm.2	Khnyn	0.0213577	0.276704	24	6	0.304056
TC1400000877.mm.2	Rnaseh2b	0.0213577	0.276704	24	16	0.424264
TC1500002209.mm.2	Fmnl3	0.0213577	0.276704	24	12	0.286378
TC1600000266.mm.2	Klhl24	0.0213577	0.276704	24	8	0.786656
TC1600000487.mm.2	Mylk	0.0213577	0.276704	24	14	0.36416
TC1600001349.mm.2	Alg3	0.0213577	0.276704	24	20	0.226274
TC1700000305.mm.2	Vmn2r113	0.0213577	0.276704	24	4	0.286378
TC1700000695.mm.2	2300002M23Rik	0.0213577	0.276704	24	4	0.19799
TC1800000165.mm.2	Mep1b	0.0213577	0.276704	24	20	0.282843
TC1900000069.mm.2	Fibp	0.0213577	0.276704	24	12	0.268701
TC1900001081.mm.2	Asrgl1	0.0213577	0.276704	24	16	0.254558
TC1900001541.mm.2	Got1	0.0213577	0.276704	24	0	0.449013
TC5_GL456354_random00000001.mm.2	A430089I19Rik	0.0213577	0.276704	24	4	0.309359
TC0100000655.mm.2	Stk16	0.0233877	0.289491	24	18	0.187383
TC0100001722.mm.2	Pycr2	0.0233877	0.289491	24	20	0.162635
TC0100002274.mm.2	Mettl21e	0.0233877	0.289491	24	6	0.378302
TC0100003855.mm.2	Cr1l	0.0233877	0.289491	24	6	0.155563
TC0100003889.mm.2	Mnda	0.0233877	0.289491	24	22	0.296985
TC0200000634.mm.2	Cntrl	0.0233877	0.289491	24	8	0.36416
TC0200005463.mm.2	Npdc1	0.0233877	0.289491	24	16	0.169706
TC0300000802.mm.2	S100a16	0.0233877	0.289491	24	22	0.201525
TC0300001338.mm.2	Papss1	0.0233877	0.289491	24	20	0.452548
TC0400000700.mm.2	Prpf4	0.0233877	0.289491	24	16	0.205061
TC0400001738.mm.2	Tmco4	0.0233877	0.289491	24	10	0.622254
TC0400001874.mm.2	Gm13238	0.0233877	0.289491	24	4	0.312895
TC0400002095.mm.2	Mxra8	0.0233877	0.289491	24	14	0.335876
TC0400003016.mm.2	Klhl9	0.0233877	0.289491	24	16	0.141421
TC0400003586.mm.2	S100pbp	0.0233877	0.289491	24	12	0.394212
TC0500000432.mm.2	Stx18	0.0233877	0.289491	24	22	0.22981
TC0500000791.mm.2	Ugt2b35	0.0233877	0.289491	24	10	0.240416
TC0500001128.mm.2	Zfp932	0.0233877	0.289491	24	20	0.353553
TC0500002286.mm.2	Wdr1	0.0233877	0.289491	24	6	0.171473
TC0500003297.mm.2	Stx2	0.0233877	0.289491	24	16	0.220971
TC0600000044.mm.2	Tac1	0.0233877	0.289491	24	20	0.350018
TC0600000047.mm.2	C1galt1	0.0233877	0.289491	24	10	0.180312
TC0600000588.mm.2	Npy	0.0233877	0.289491	24	16	0.36416
TC0600001076.mm.2	Aldh1l1	0.0233877	0.289491	24	2	0.233345
TC0600001239.mm.2	Setd5	0.0233877	0.289491	24	10	0.222739
TC0600001279.mm.2	Pparg	0.0233877	0.289491	24	12	0.641699
TC0600001536.mm.2	Gabarapl1	0.0233877	0.289491	24	8	0.601041
TC0600001733.mm.2	Fgfr1op2	0.0233877	0.289491	24	8	0.19799
TC0600001793.mm.2	Tfpi2	0.0233877	0.289491	24	0	0.378302
TC0600002137.mm.2	E330009J07Rik	0.0233877	0.289491	24	10	0.475529
TC0600002954.mm.2	Mkrn2os	0.0233877	0.289491	24	22	0.153796
TC0700000364.mm.2	V1rd18; V1rd19	0.0233877	0.289491	24	20	0.220971
TC0700000786.mm.2	Klk1b11	0.0233877	0.289491	24	6	0.371231
TC0700002421.mm.2	C5ar2	0.0233877	0.289491	24	18	0.249255
TC0700003942.mm.2	Trim30c	0.0233877	0.289491	24	22	0.289914
TC0800000521.mm.2	Pdlim3	0.0233877	0.289491	24	14	0.319966
TC0900001673.mm.2	Ccr3	0.0233877	0.289491	24	2	0.480833
TC0X00000649.mm.2	Mtm1	0.0233877	0.289491	24	8	0.4278
TC0X00001665.mm.2	Pir	0.0233877	0.289491	24	8	0.353553
TC0X00002235.mm.2	Plac1	0.0233877	0.289491	24	20	0.148492
TC0X00002266.mm.2	Mmgt1; Mir5116	0.0233877	0.289491	24	16	0.268701
TC0Y00000011.mm.2	Gm10256; Gm10352; Gm21704; Gm4064; Rbmy	0.0233877	0.289491	24	6	0.339411
TC1000000547.mm.2	Psap	0.0233877	0.289491	24	10	0.187383
TC1000000746.mm.2	Ftcd	0.0233877	0.289491	24	22	0.19799
TC1000001493.mm.2	Gns	0.0233877	0.289491	24	14	0.148492
TC1000001704.mm.2	Tab2	0.0233877	0.289491	24	4	0.335876
TC1000001881.mm.2	Rps12; Snora33; Snord100	0.0233877	0.289491	24	18	0.268701
TC1000002943.mm.2	Slc35e3	0.0233877	0.289491	24	16	0.187383
TC1000002998.mm.2	Dyrk2	0.0233877	0.289491	24	6	0.231577
TC1100000035.mm.2	Rnf215	0.0233877	0.289491	24	16	0.30052
TC1100000681.mm.2	Gm12250	0.0233877	0.289491	24	22	0.657609
TC1100003374.mm.2	Nle1	0.0233877	0.289491	24	2	0.0494975
TC1100003696.mm.2	Ccr7	0.0233877	0.289491	24	4	0.325269
TC1200000183.mm.2	Iah1	0.0233877	0.289491	24	10	0.272236
TC1200000387.mm.2	Pnpla8; Gm2027	0.0233877	0.289491	24	10	0.46669
TC1200001281.mm.2	Crip2	0.0233877	0.289491	24	4	0.410122
TC1200001601.mm.2	Hbp1	0.0233877	0.289491	24	6	0.461387
TC1200001722.mm.2	Hectd1	0.0233877	0.289491	24	10	0.350018
TC1200001971.mm.2	Atp6v1d	0.0233877	0.289491	24	16	0.205061
TC1300000278.mm.2	BC005537	0.0233877	0.289491	24	16	0.109602
TC1300000301.mm.2	Prl6a1	0.0233877	0.289491	24	4	0.254558
TC1300000482.mm.2	Phactr1	0.0233877	0.289491	24	0	0.387141
TC1300000881.mm.2	Mrpl36	0.0233877	0.289491	24	20	0.162635
TC1300000893.mm.2	Tppp	0.0233877	0.289491	24	16	0.470226
TC1300001374.mm.2	Net1	0.0233877	0.289491	24	0	0.247487
TC1300002327.mm.2		0.0233877	0.289491	24	4	0.196222
TC1400000777.mm.2	Dhrs4	0.0233877	0.289491	24	16	0.22981
TC1400001533.mm.2	Dnajc9	0.0233877	0.289491	24	16	0.222739
TC1400002870.mm.2	Setdb2; Phf11c; Phf11d	0.0233877	0.289491	24	12	0.286378
TC1500000232.mm.2	Mtdh	0.0233877	0.289491	24	8	0.212132
TC1500001933.mm.2	Polr3h	0.0233877	0.289491	24	16	0.265165
TC1500001934.mm.2	Pmm1	0.0233877	0.289491	24	8	0.258094
TC1600000227.mm.2	Tssk1	0.0233877	0.289491	24	18	0.162635
TC1600000291.mm.2	Polr2h	0.0233877	0.289491	24	16	0.24572
TC1700000269.mm.2	Zfp677	0.0233877	0.289491	24	14	0.268701
TC1700000523.mm.2	Glp1r	0.0233877	0.289491	24	4	0.36416
TC1700000535.mm.2	Pde9a	0.0233877	0.289491	24	0	0.449013
TC1700000796.mm.2	Olfr133	0.0233877	0.289491	24	4	0.277539
TC1900000045.mm.2	Ccdc87	0.0233877	0.289491	24	18	0.13435
TC1900001445.mm.2	Ppp1r3c	0.0233877	0.289491	24	2	0.477297
TC0100000038.mm.2	Rrs1	0.0257849	0.30505	24	16	0.190919
TC0100000467.mm.2	Nbeal1	0.0257849	0.30505	24	10	0.190919
TC0100002305.mm.2	Nabp1	0.0257849	0.30505	24	16	0.353553
TC0100002481.mm.2	Idh1	0.0257849	0.30505	24	8	0.13435
TC0200001223.mm.2	Timm10	0.0257849	0.30505	24	20	0.372999
TC0200001335.mm.2	Olfr1212	0.0257849	0.30505	24	2	0.304056
TC0200001829.mm.2	Ctdspl2	0.0257849	0.30505	24	14	0.219203
TC0200002279.mm.2	Tbc1d20	0.0257849	0.30505	24	10	0.519723
TC0200002735.mm.2	2210418O10Rik; Gm17258	0.0257849	0.30505	24	16	0.247487
TC0200002825.mm.2	Abhd16b	0.0257849	0.30505	24	10	0.252791
TC0200004667.mm.2	Slc23a2	0.0257849	0.30505	24	8	0.434871
TC0200005000.mm.2	5430405H02Rik	0.0257849	0.30505	24	12	0.279307
TC0200005334.mm.2	Gm14391; Gm6710	0.0257849	0.30505	24	20	0.268701
TC0200005354.mm.2	Gm14296	0.0257849	0.30505	24	16	0.247487
TC0300000806.mm.2	S100a3	0.0257849	0.30505	24	22	0.190919
TC0300000853.mm.2	S100a10	0.0257849	0.30505	24	0	0.487904
TC0300002497.mm.2	Bola1	0.0257849	0.30505	24	18	0.355321
TC0300003222.mm.2	Ovgp1	0.0257849	0.30505	24	14	0.36416
TC0400000057.mm.2	Chd7	0.0257849	0.30505	24	12	0.279307
TC0400000304.mm.2	Akirin2	0.0257849	0.30505	24	8	0.157331
TC0400000743.mm.2	Tlr4	0.0257849	0.30505	24	14	0.169706
TC0400003822.mm.2	Cda	0.0257849	0.30505	24	22	0.583363
TC0400004058.mm.2	H6pd	0.0257849	0.30505	24	6	0.441942
TC0500002091.mm.2	Wdr86	0.0257849	0.30505	24	2	0.194454
TC0500002693.mm.2	Ugt2b5	0.0257849	0.30505	24	14	0.215668
TC0500002881.mm.2	Hsd17b13	0.0257849	0.30505	24	16	0.235113
TC0500003116.mm.2	Hspb8	0.0257849	0.30505	24	20	0.484368
TC0600001250.mm.2	Jagn1	0.0257849	0.30505	24	16	0.19799
TC0600001591.mm.2	Crebl2	0.0257849	0.30505	24	14	0.148492
TC0600003443.mm.2	1700034J05Rik	0.0257849	0.30505	24	2	0.304056
TC0700000484.mm.2	Fcgbp	0.0257849	0.30505	24	4	0.26163
TC0700001281.mm.2	Ccdc89	0.0257849	0.30505	24	18	0.194454
TC0700002330.mm.2	Vmn1r76	0.0257849	0.30505	24	2	0.385373
TC0700003006.mm.2	Ftl1	0.0257849	0.30505	24	20	0.0565685
TC0700004021.mm.2	Olfr702	0.0257849	0.30505	24	22	0.231577
TC0700004215.mm.2	Usp31	0.0257849	0.30505	24	16	0.231577
TC0700004545.mm.2	Chid1	0.0257849	0.30505	24	20	0.335876
TC0800002516.mm.2	Mmaa	0.0257849	0.30505	24	22	0.231577
TC0800002722.mm.2	Amfr	0.0257849	0.30505	24	12	0.484368
TC0800002819.mm.2	Fhod1	0.0257849	0.30505	24	22	0.295217
TC0900000197.mm.2	Dnm2	0.0257849	0.30505	24	10	0.16617
TC0900000203.mm.2	Smarca4	0.0257849	0.30505	24	22	0.162635
TC0900001202.mm.2	Atr	0.0257849	0.30505	24	12	0.346482
TC0900001374.mm.2	Tusc2	0.0257849	0.30505	24	6	0.233345
TC0900001632.mm.2	1700048O20Rik	0.0257849	0.30505	24	18	0.28461
TC0900002314.mm.2	Tnfaip8l3	0.0257849	0.30505	24	22	0.304056
TC0900002491.mm.2	Map2k1	0.0257849	0.30505	24	4	0.314663
TC0900002915.mm.2	Pik3cb	0.0257849	0.30505	24	12	0.304056
TC0900002969.mm.2	Cdv3	0.0257849	0.30505	24	14	0.176777
TC0900003307.mm.2	Slc6a20a	0.0257849	0.30505	24	4	0.247487
TC0X00001824.mm.2	Gm14862	0.0257849	0.30505	24	2	0.183848
TC1000000037.mm.2	Gm3213	0.0257849	0.30505	24	2	0.189151
TC1000000422.mm.2	Prep	0.0257849	0.30505	24	12	0.212132
TC1000001590.mm.2	Gls2	0.0257849	0.30505	24	22	0.289914
TC1000002508.mm.2	Btbd2	0.0257849	0.30505	24	6	0.220971
TC1000003227.mm.2	Rdh5	0.0257849	0.30505	24	22	0.272236
TC1100001022.mm.2	Olfr376	0.0257849	0.30505	24	22	0.217435
TC1100002438.mm.2	Acyp2	0.0257849	0.30505	24	14	0.346482
TC1100002654.mm.2	Btnl9	0.0257849	0.30505	24	16	0.222739
TC1200000139.mm.2	Pdia6	0.0257849	0.30505	24	22	0.279307
TC1200000799.mm.2	Acot4	0.0257849	0.30505	24	14	0.553311
TC1300000167.mm.2	AK157302	0.0257849	0.30505	24	16	0.167938
TC1300000198.mm.2	Vmn1r195	0.0257849	0.30505	24	18	0.144957
TC1300000571.mm.2	Nol8	0.0257849	0.30505	24	14	0.268701
TC1300002510.mm.2	Tnpo1	0.0257849	0.30505	24	10	0.26163
TC1400001047.mm.2	Esd	0.0257849	0.30505	24	14	0.109602
TC1400001200.mm.2	Ndfip2	0.0257849	0.30505	24	10	0.286378
TC1400002098.mm.2	Tgm1	0.0257849	0.30505	24	18	0.420729
TC1400002334.mm.2	Sorbs3	0.0257849	0.30505	24	10	0.415425
TC1400002859.mm.2	Hacl1	0.0257849	0.30505	24	0	0.509117
TC1500000862.mm.2	Selo	0.0257849	0.30505	24	10	0.309359
TC1500001041.mm.2	Mettl7a3	0.0257849	0.30505	24	8	0.141421
TC1500001217.mm.2	Sub1	0.0257849	0.30505	24	6	0.144957
TC1600001117.mm.2	Crebbp	0.0257849	0.30505	24	8	0.26163
TC1700000711.mm.2	Ppp1r10; Mir1894	0.0257849	0.30505	24	18	0.374767
TC1700002784.mm.2	Pbx2	0.0257849	0.30505	24	14	0.152028
TC1700002808.mm.2	Hnrnpm	0.0257849	0.30505	24	8	0.342947
TC1900000090.mm.2	Slc25a45	0.0257849	0.30505	24	22	0.502046
TC1900000141.mm.2	Pla2g16	0.0257849	0.30505	24	8	0.205061
TC1900000881.mm.2	Ppp6r3	0.0257849	0.30505	24	6	0.141421
TC1900001172.mm.2	Olfr1446	0.0257849	0.30505	24	2	0.307591
TC1900001173.mm.2	Olfr1447	0.0257849	0.30505	24	8	0.325269
TC1900001724.mm.2	1700019N19Rik	0.0257849	0.30505	24	8	0.243952
TC0100002667.mm.2	Irs1	0.0281821	0.316226	24	22	0.318198
TC0100002899.mm.2	Kdsr	0.0281821	0.316226	24	10	0.424264
TC0100003679.mm.2	Ephx1	0.0281821	0.316226	24	14	0.611647
TC0100003878.mm.2	Mpp4	0.0281821	0.316226	24	18	0.385373
TC0200001224.mm.2	Slc43a1	0.0281821	0.316226	24	18	0.381838
TC0200001354.mm.2	Fnbp4	0.0281821	0.316226	24	16	0.226274
TC0200001935.mm.2	Mertk	0.0281821	0.316226	24	14	0.265165
TC0200002345.mm.2	Actl10	0.0281821	0.316226	24	22	0.360624
TC0200002491.mm.2	Ttpal	0.0281821	0.316226	24	12	0.36416
TC0200003174.mm.2	Ubac1	0.0281821	0.316226	24	14	0.24572
TC0200003277.mm.2	Asb6	0.0281821	0.316226	24	20	0.243952
TC0200003312.mm.2	Cfap157	0.0281821	0.316226	24	4	0.312895
TC0200003492.mm.2	Orc4	0.0281821	0.316226	24	4	0.321734
TC0300000635.mm.2	Ctso	0.0281821	0.316226	24	8	0.152028
TC0300003194.mm.2	Cth	0.0281821	0.316226	24	2	0.438406
TC0400000336.mm.2	1700009N14Rik	0.0281821	0.316226	24	0	0.19799
TC0400001164.mm.2	Eps15	0.0281821	0.316226	24	10	0.302288
TC0400002386.mm.2	Orc3	0.0281821	0.316226	24	22	0.222739
TC0400003224.mm.2	Dmrtb1	0.0281821	0.316226	24	4	0.350018
TC0400003326.mm.2	Dmbx1	0.0281821	0.316226	24	12	0.162635
TC0400003814.mm.2	Alpl	0.0281821	0.316226	24	18	0.737159
TC0500000238.mm.2	Actr3b	0.0281821	0.316226	24	6	0.277539
TC0500002288.mm.2	Zfp518b	0.0281821	0.316226	24	4	0.275772
TC0500002753.mm.2	Naaa	0.0281821	0.316226	24	16	0.169706
TC0500002933.mm.2	Evi5	0.0281821	0.316226	24	8	0.31643
TC0500003638.mm.2	Ubl3	0.0281821	0.316226	24	14	0.240416
TC0600000608.mm.2	Cbx3	0.0281821	0.316226	24	8	0.219203
TC0600000916.mm.2	Aup1	0.0281821	0.316226	24	16	0.190919
TC0600001074.mm.2	Klf15	0.0281821	0.316226	24	18	0.176777
TC0600001100.mm.2	A730049H05Rik	0.0281821	0.316226	24	4	0.369463
TC0600001475.mm.2	Fgf6	0.0281821	0.316226	24	6	0.212132
TC0600001647.mm.2	Pik3c2g	0.0281821	0.316226	24	20	0.279307
TC0600001992.mm.2	Ube2h	0.0281821	0.316226	24	8	0.360624
TC0600002460.mm.2	Thnsl2	0.0281821	0.316226	24	6	0.265165
TC0600002672.mm.2	H1fx	0.0281821	0.316226	24	10	0.169706
TC0600003071.mm.2	Apobec1	0.0281821	0.316226	24	2	0.39598
TC0600003489.mm.2	Glcci1	0.0281821	0.316226	24	12	0.328805
TC0700000494.mm.2	Eid2b	0.0281821	0.316226	24	20	0.311127
TC0700000554.mm.2	Polr2i	0.0281821	0.316226	24	16	0.318198
TC0700002102.mm.2	Dhcr7	0.0281821	0.316226	24	22	0.394212
TC0700002193.mm.2	Vmn1r59	0.0281821	0.316226	24	0	0.36416
TC0700002587.mm.2	Vmn1r177	0.0281821	0.316226	24	6	0.314663
TC0700002787.mm.2	Fxyd7	0.0281821	0.316226	24	6	0.410122
TC0700004062.mm.2	Olfr517	0.0281821	0.316226	24	20	0.208597
TC0700004501.mm.2	Olfr532	0.0281821	0.316226	24	20	0.137886
TC0800000244.mm.2	Gm14850	0.0281821	0.316226	24	6	0.311127
TC0800000312.mm.2	Tm2d2	0.0281821	0.316226	24	18	0.279307
TC0800001883.mm.2	Gpat4	0.0281821	0.316226	24	14	0.203293
TC0800002408.mm.2	Arrdc2	0.0281821	0.316226	24	12	0.53033
TC0900000053.mm.2	Mmp7	0.0281821	0.316226	24	20	0.240416
TC0900000191.mm.2	Atg4d	0.0281821	0.316226	24	14	0.22981
TC0900000550.mm.2	Sik3	0.0281821	0.316226	24	8	0.28461
TC0900001483.mm.2	Lrrfip2	0.0281821	0.316226	24	16	0.236881
TC0900001630.mm.2	Ackr2	0.0281821	0.316226	24	8	0.251023
TC0900002397.mm.2	Rec114	0.0281821	0.316226	24	0	0.388909
TC0900002509.mm.2	Kbtbd13	0.0281821	0.316226	24	20	0.148492
TC0900003008.mm.2	Acy1	0.0281821	0.316226	24	22	0.289914
TC0X00000277.mm.2	Gm21645	0.0281821	0.316226	24	4	0.392444
TC0X00000342.mm.2	Rhox4a2; Rhox4a	0.0281821	0.316226	24	4	0.286378
TC0X00001062.mm.2	Fgf16	0.0281821	0.316226	24	2	0.116673
TC0X00001728.mm.2	Gm21637; Spin2-ps1	0.0281821	0.316226	24	4	0.281075
TC0X00002920.mm.2	Gm17521	0.0281821	0.316226	24	8	0.36416
TC0X00002993.mm.2	Timm8a1	0.0281821	0.316226	24	16	0.215668
TC0Y00000235.mm.2	Ddx3y	0.0281821	0.316226	24	8	0.176777
TC1000000626.mm.2	Jmjd1c	0.0281821	0.316226	24	0	0.251023
TC1000001084.mm.2	Arl1	0.0281821	0.316226	24	14	0.137886
TC1000001284.mm.2	Csrp2	0.0281821	0.316226	24	16	0.272236
TC1000002491.mm.2	Cbarp	0.0281821	0.316226	24	2	0.190919
TC1100000520.mm.2	Scgb3a1	0.0281821	0.316226	24	0	0.346482
TC1100001196.mm.2	Adap2	0.0281821	0.316226	24	18	0.205061
TC1100001880.mm.2	Gprc5c	0.0281821	0.316226	24	10	0.434871
TC1100002269.mm.2	Meis1	0.0281821	0.316226	24	22	0.263397
TC1100003532.mm.2	Stxbp4	0.0281821	0.316226	24	22	0.251023
TC1100003687.mm.2	Med24	0.0281821	0.316226	24	2	0.420729
TC1100003914.mm.2	Limd2	0.0281821	0.316226	24	8	0.275772
TC1100003966.mm.2	Prkca	0.0281821	0.316226	24	6	0.381838
TC1100004277.mm.2	Ramp2	0.0281821	0.316226	24	16	0.346482
TC1200000013.mm.2	Dtnb	0.0281821	0.316226	24	12	0.19799
TC1200000626.mm.2	Ppm1a	0.0281821	0.316226	24	10	0.493207
TC1200000795.mm.2	Papln	0.0281821	0.316226	24	8	0.258094
TC1200001257.mm.2	Kif26a	0.0281821	0.316226	24	4	0.236881
TC1200001869.mm.2	Sos2	0.0281821	0.316226	24	12	0.378302
TC1400000177.mm.2	Vcl	0.0281821	0.316226	24	20	0.346482
TC1400000576.mm.2	Rnase10	0.0281821	0.316226	24	2	0.328805
TC1500000407.mm.2	Tbc1d31	0.0281821	0.316226	24	16	0.137886
TC1500000565.mm.2	Gsdmd	0.0281821	0.316226	24	2	0.240416
TC1500001379.mm.2	Pabpc1	0.0281821	0.316226	24	14	0.116673
TC1500001504.mm.2	Eif3h	0.0281821	0.316226	24	18	0.205061
TC1500002339.mm.2	Hoxc10	0.0281821	0.316226	24	22	0.176777
TC1600001375.mm.2	Igf2bp2	0.0281821	0.316226	24	2	0.404819
TC1600002056.mm.2	Urb1	0.0281821	0.316226	24	14	0.298753
TC1700000391.mm.2	Jmjd8	0.0281821	0.316226	24	20	0.247487
TC1700000625.mm.2	H2-Ob	0.0281821	0.316226	24	8	0.597505
TC1700001699.mm.2	Dusp1	0.0281821	0.316226	24	18	0.951059
TC1700001870.mm.2	Zfp101	0.0281821	0.316226	24	6	0.247487
TC1700002647.mm.2	Zfp36l2	0.0281821	0.316226	24	12	0.344715
TC1700002804.mm.2	Pigq	0.0281821	0.316226	24	14	0.22981
TC1800000342.mm.2	Tmco6	0.0281821	0.316226	24	8	0.339411
TC1800001081.mm.2	Rprd1a	0.0281821	0.316226	24	16	0.155563
TC1900000056.mm.2	Yif1a	0.0281821	0.316226	24	20	0.286378
TC1900000547.mm.2	Lgi1	0.0281821	0.316226	24	20	0.358857
TC1900000904.mm.2	Cabp4	0.0281821	0.316226	24	10	0.19799
TC0100000372.mm.2	Sdpr	0.0310012	0.333534	24	10	0.447245
TC0100000374.mm.2	Stat4	0.0310012	0.333534	24	8	0.441942
TC0100000640.mm.2	Ttll4	0.0310012	0.333534	24	14	0.26163
TC0100003069.mm.2	Cdk18	0.0310012	0.333534	24	18	0.254558
TC0200000581.mm.2	Naif1	0.0310012	0.333534	24	18	0.353553
TC0200001895.mm.2	Dtwd1	0.0310012	0.333534	24	20	0.371231
TC0200003528.mm.2	Nmi	0.0310012	0.333534	24	0	0.272236
TC0200003751.mm.2	Ola1	0.0310012	0.333534	24	0	0.305824
TC0200004038.mm.2	Olfr1218	0.0310012	0.333534	24	2	0.33234
TC0200004920.mm.2	Dusp15	0.0310012	0.333534	24	18	0.123744
TC0300000675.mm.2	Sh3d19	0.0310012	0.333534	24	10	0.106066
TC0300000831.mm.2	Sprr2k	0.0310012	0.333534	24	4	0.162635
TC0300002731.mm.2	Gnai3	0.0310012	0.333534	24	8	0.106066
TC0400000381.mm.2	Il11ra1	0.0310012	0.333534	24	4	0.212132
TC0400000529.mm.2	Nr4a3	0.0310012	0.333534	24	12	0.256326
TC0400001087.mm.2	C8b	0.0310012	0.333534	24	20	1.02884
TC0400001212.mm.2	Gm12830	0.0310012	0.333534	24	20	0.127279
TC0400001651.mm.2	Runx3	0.0310012	0.333534	24	4	0.36416
TC0400001671.mm.2	Gale	0.0310012	0.333534	24	0	0.454316
TC0500000627.mm.2	Rhoh	0.0310012	0.333534	24	16	0.296985
[truncated: 593 more rows]

## Sheet: Sheet 3
ID	Gene.Symbol
TC0200000909.mm.2	44262
TC1700001621.mm.2	1600002H07Rik
TC0800001891.mm.2	1810011O10Rik
TC1600000097.mm.2	1810013L24Rik
TC1900000015.mm.2	1810055G02Rik
TC0200002735.mm.2	2210418O10Rik; Gm17258
TC0500001308.mm.2	2410131K14Rik
TC0700000732.mm.2	2610021A01Rik
TC0300000272.mm.2	4932438A13Rik
TC1900000607.mm.2	4933411K16Rik; Hoga1
TC1500001996.mm.2	5031439G07Rik; Mir1249
TC1000002338.mm.2	A930033H14Rik
TC1100004002.mm.2	Abca6
TC0200003698.mm.2	Abcb11
TC0500000054.mm.2	Abcb4
TC1900000636.mm.2	Abcc2
TC1500002075.mm.2	Abcd2
TC1700002655.mm.2	Abcg5
TC1700001265.mm.2	Abcg8
TC0700003650.mm.2	Abhd17c
TC1800001431.mm.2	Ablim3
TC0100001123.mm.2	Acmsd
TC0400000341.mm.2	Aco1
TC1300001028.mm.2	Acot12
TC0700001715.mm.2	Acsm3
TC0200002367.mm.2	Acss2
TC1200001990.mm.2	Actn1
TC0900003008.mm.2	Acy1
TC1100001196.mm.2	Adap2
TC1000002420.mm.2	Adarb1
TC0100003662.mm.2	Adck3
TC0100001228.mm.2	Adipor1
TC1100000601.mm.2	Aff4
TC1100004284.mm.2	Afmid
TC0100000711.mm.2	Agfg1
TC0400003537.mm.2	Ago3
TC0200003195.mm.2	Agpat2
TC0100000925.mm.2	Agxt
TC0100003893.mm.2	Ahctf1
TC1100002364.mm.2	Ahsa2
TC0400002743.mm.2	AI314180
TC1900000065.mm.2	AI837181
TC1000000574.mm.2	Aifm2
TC0400001509.mm.2	Ak2
TC0400001034.mm.2	Ak4
TC1700001839.mm.2	Akap8l
TC1300000016.mm.2	Akr1c14
TC0900003004.mm.2	Alas1
TC1700001021.mm.2	Alkbh7
TC0400003814.mm.2	Alpl
TC1000002003.mm.2	Amd2
TC1000002043.mm.2	Amd2; Amd1
TC1000002695.mm.2	Amdhd1
TC0900001399.mm.2	Amt
TC0900001290.mm.2	Anapc13
TC0200000603.mm.2	Angptl2
TC1700002420.mm.2	Ankrd12
TC0700000663.mm.2	Ankrd27
TC0900000786.mm.2	Anp32a
TC1400001537.mm.2	Anxa7
TC1400002080.mm.2	Ap1g2
TC1400001554.mm.2	Ap3m1
TC0900003051.mm.2	Apeh
TC0600003071.mm.2	Apobec1
TC1400001627.mm.2	Appl1
TC0700003769.mm.2	Aqp11
TC0900002604.mm.2	Aqp9
TC0X00000216.mm.2	Araf
TC0100001955.mm.2	Arfgef1
TC0400003862.mm.2	Arhgef10l
TC0300000494.mm.2	Arhgef26
TC0900003066.mm.2	Arih2
TC1000001084.mm.2	Arl1
TC0800001116.mm.2	Arl2bp
TC0100001245.mm.2	Arl8a
TC0700001660.mm.2	Arntl
TC1200002518.mm.2	Asap2
TC0500003314.mm.2	Asl
TC1200001253.mm.2	Aspg
TC1200000009.mm.2	Asxl2
TC1700001986.mm.2	Atat1
TC0100003513.mm.2	Atf6
TC1900000108.mm.2	Atg2a
TC1700002573.mm.2	Atl2
TC1900000140.mm.2	Atl3
TC0X00002307.mm.2	Atp11c
TC0300002605.mm.2	Atp1a1
TC0100003422.mm.2	Atp1b1
TC1500000296.mm.2	Atp6v1c1
TC1200001971.mm.2	Atp6v1d
TC0400004221.mm.2	AU022252
TC1000001506.mm.2	Avpr1a
TC0200005186.mm.2	B4galt5
TC0700001886.mm.2	Bag3
TC0500003576.mm.2	Baiap2l1
TC0800001477.mm.2	Banp
TC1400000326.mm.2	Bap1
TC0500001578.mm.2	Baz1b
TC0200004308.mm.2	Bbox1
TC1300000278.mm.2	BC005537
TC0700000451.mm.2	BC024978
TC0X00002433.mm.2	Bcap31
TC0800002953.mm.2	Bcar1
TC0900001103.mm.2	Bckdhb
TC0200001927.mm.2	Bcl2l11
TC1600000409.mm.2	Bdh1
TC0200000033.mm.2	Bend7
TC1300002436.mm.2	Bhmt
TC1300002437.mm.2	Bhmt2
TC0200005023.mm.2	Blcap
TC0500000934.mm.2	Bmp2k
TC0900000922.mm.2	Bnip2
TC0700004474.mm.2	Bnip3
TC1100003943.mm.2	Bptf
TC0500001369.mm.2	Brap
TC0400003255.mm.2	Btf3l4
TC1100002654.mm.2	Btnl9
TC1700002208.mm.2	Bysl
TC0600000047.mm.2	C1galt1
TC0800002593.mm.2	Calr
TC0200002876.mm.2	Camk1d
TC0300002491.mm.2	Car14
TC1600001177.mm.2	Carhsp1
TC0200004227.mm.2	Cat
TC1600000726.mm.2	Cblb
TC1700001822.mm.2	Cbs
TC0600000608.mm.2	Cbx3
TC1900000045.mm.2	Ccdc87
TC0700004610.mm.2	Ccnd1; Mir3962
TC0700002876.mm.2	Ccne1
TC0500000896.mm.2	Ccng2
TC0500002770.mm.2	Ccni
TC1100000428.mm.2	Ccnjl
TC1000002920.mm.2	Cct2
TC0500001512.mm.2	Cct6a; Snora15
TC0700004277.mm.2	Cd19
TC0400003822.mm.2	Cda
TC0900003300.mm.2	Cdcp1
TC0800001255.mm.2	Cdh1
TC1000000349.mm.2	Cdk19
TC1700000496.mm.2	Cdkn1a
TC1800001307.mm.2	Cdo1
TC0900002969.mm.2	Cdv3
TC0700002635.mm.2	Ceacam1
TC0700002636.mm.2	Ceacam2
TC0600001352.mm.2	Cecr2
TC1500002010.mm.2	Celsr1
TC1000002164.mm.2	Cep85l
TC0300002688.mm.2	Cept1
TC0800002702.mm.2	Ces1d
TC0600002728.mm.2	Chchd4
TC0500002615.mm.2	Chic2
TC1900000018.mm.2	Chka
TC0600001171.mm.2	Chl1
TC0600000648.mm.2	Chn2
TC0900000132.mm.2	Chordc1
TC1000002645.mm.2	Chpt1
TC0800002734.mm.2	Ciapin1
TC0300002489.mm.2	Ciart
TC1200000865.mm.2	Cipc
TC0800001258.mm.2	Cirh1a
TC1000000122.mm.2	Cited2
TC1600001419.mm.2	Cldn1
TC0600001530.mm.2	Clec2d
TC0800001617.mm.2	Clec4g
TC1100000459.mm.2	Clint1
TC1200002296.mm.2	Clmn
TC0800000146.mm.2	Cln8
TC0500002628.mm.2	Clock
TC0900000835.mm.2	Clpx
TC1100003455.mm.2	Cltc
TC1100001047.mm.2	Cluh
TC0800001400.mm.2	Cmip
TC0800002107.mm.2	Cnot7
TC1100001644.mm.2	Cntnap1
TC0200004932.mm.2	Commd7
TC0100000393.mm.2	Coq10b
TC0100001685.mm.2	Cox20
TC0600000182.mm.2	Cped1
TC1900000008.mm.2	Cpt1a
TC1700001178.mm.2	Crim1
TC1200001281.mm.2	Crip2
TC0500001936.mm.2	Crot
TC1000002605.mm.2	Cry1
TC0200004140.mm.2	Cry2
TC1600001805.mm.2	Crybg3
TC1500000733.mm.2	Csdc2
TC1200000503.mm.2	Ctage5
TC0100000633.mm.2	Ctdsp1
TC1000001542.mm.2	Ctdsp2; Mir26a-2; Mir546
TC0300003194.mm.2	Cth
TC0X00001653.mm.2	Ctps2
TC0700004604.mm.2	Cttn
TC0600001313.mm.2	Cxcl12
TC0700000445.mm.2	Cyp2a5; Cyp2a4
TC1500001955.mm.2	Cyp2d40
TC1700000836.mm.2	Cyp39a1
TC0400002151.mm.2	Cyp7a1
TC0900003276.mm.2	Cyp8b1
TC1500000417.mm.2	D15Ertd621e
TC1700001744.mm.2	D17Wsu92e
TC0800001207.mm.2	D230025D16Rik
TC0500003728.mm.2	D5Ertd579e
TC1700002240.mm.2	Daam2
TC1300000735.mm.2	Dapk1
TC1500001051.mm.2	Dazap2
TC0700000861.mm.2	Dbp
TC0300001192.mm.2	Dbt
TC0100003443.mm.2	Dcaf6
TC1100001770.mm.2	Dcaf7
TC1900001705.mm.2	Dclre1a
TC1000001555.mm.2	Dctn2
TC0500000689.mm.2	Dcun1d4
TC1100002225.mm.2	Ddc
TC0800001917.mm.2	Ddhd2
TC1000000355.mm.2	Ddo
TC1700002787.mm.2	Ddx39b; Mir8094
TC0Y00000235.mm.2	Ddx3y
TC1300000671.mm.2	Ddx46
TC0800002389.mm.2	Ddx49
TC0400002434.mm.2	Ddx58
TC0800000659.mm.2	Ddx60
TC0800000259.mm.2	Defb1
TC0600003475.mm.2	Dennd5b
TC0300001587.mm.2	Depdc1a
TC0100000829.mm.2	Dgkd
TC0400001107.mm.2	Dhcr24
TC0400001856.mm.2	Dhrs3
TC1400000777.mm.2	Dhrs4
TC0200001006.mm.2	Dhrs9
TC0100003279.mm.2	Dhx9
TC1300001190.mm.2	Dimt1
TC1600001553.mm.2	Dirc2
TC1600000415.mm.2	Dlg1
TC0300003139.mm.2	Dnajb4
TC0500000277.mm.2	Dnajb6
TC0300003103.mm.2	Dnase2b
TC1600001259.mm.2	Dnm1l
TC1400001695.mm.2	Dph3
TC1800001043.mm.2	Dsc2
TC1900001163.mm.2	Dtx4
TC0100002838.mm.2	Dtymk
TC0700000488.mm.2	Dyrk1b
TC1000002998.mm.2	Dyrk2
TC0700000972.mm.2	E030018B13Rik
TC0400001312.mm.2	Ebna1bp2; D4Ertd617e
TC0100002758.mm.2	Ecel1
TC1300001794.mm.2	Eci2
TC1400002641.mm.2	Ednrb
TC1000000884.mm.2	Eef2
TC0400003894.mm.2	Efhd2
TC1800000301.mm.2	Egr1
TC0500003261.mm.2	Eif2b1
TC0800000353.mm.2	Eif4ebp1
TC0600002494.mm.2	Elmod3
TC0400001307.mm.2	Elovl1
TC0900001042.mm.2	Elovl5
TC1000001894.mm.2	Enpp1
TC1500001531.mm.2	Enpp2
TC1700001299.mm.2	Epas1
TC0400003653.mm.2	Epb41
TC0400002713.mm.2	Epb41l4b
TC0200000798.mm.2	Epc2
TC0400001164.mm.2	Eps15
TC0500000289.mm.2	Ept1
TC1300002588.mm.2	Erbb2ip
TC1000003153.mm.2	Erbb3
TC0100002503.mm.2	Erbb4
TC0600003020.mm.2	Erc1
TC0700002628.mm.2	Erf
TC0600003457.mm.2	Ergic2
TC1400001047.mm.2	Esd
TC0700000388.mm.2	Ethe1
TC0100001207.mm.2	Etnk2
TC0200002755.mm.2	Etohi1
TC0600000902.mm.2	Eva1a
TC0500002933.mm.2	Evi5
TC0200004163.mm.2	Ext2
TC0800002142.mm.2	F11
TC0100001498.mm.2	F5
TC1900001095.mm.2	Fads2
TC0200000585.mm.2	Fam102a
TC1800001149.mm.2	Fam13b
TC0700001070.mm.2	Fam174b
TC0500000374.mm.2	Fam193a
TC1700001677.mm.2	Fam195a
TC0900001633.mm.2	Fam198a
TC0600001126.mm.2	Fam19a1
TC1100003993.mm.2	Fam20a
TC0500001663.mm.2	Fam20c
TC0900001005.mm.2	Fam214a
TC0500000876.mm.2	Fam47e
TC1100001095.mm.2	Fam57a
TC0400003687.mm.2	Fam76a
TC0800003175.mm.2	Fam89a
TC1100003667.mm.2	Fbxl20
TC0500001302.mm.2	Fbxo21
TC1800001461.mm.2	Fech
TC0300000641.mm.2	Fga
TC1000001145.mm.2	Fgd6
TC1800001237.mm.2	Fgf1
TC0600001733.mm.2	Fgfr1op2
TC0700004666.mm.2	Fgfr2
TC0500001113.mm.2	Fgfrl1
TC0300000640.mm.2	Fgg
TC0100003610.mm.2	Fh1
TC1500002186.mm.2	Fkbp11
TC1700001757.mm.2	Fkbp5
TC1100002862.mm.2	Flcn
TC1100002894.mm.2	Flii
TC0100003401.mm.2	Fmo1
TC0100003402.mm.2	Fmo2
TC0300000967.mm.2	Fmo5
TC0100002544.mm.2	Fn1
TC0200001354.mm.2	Fnbp4
TC1100000625.mm.2	Fnip1
TC0500001715.mm.2	Foxk1
TC0200003307.mm.2	Fpgs; Mir8093
TC1000000746.mm.2	Ftcd
TC0700001871.mm.2	Fus
TC0X00002453.mm.2	G6pdx
TC0800002529.mm.2	Gab1
TC1100000934.mm.2	Gabarap
TC1600000940.mm.2	Gabpa
TC0800003237.mm.2	Galnt2
TC1800001054.mm.2	Garem
TC1000002655.mm.2	Gas2l3
TC0500002895.mm.2	Gbp10; Gbp6
TC1400001930.mm.2	Gch1
TC0900001038.mm.2	Gclc
TC1900001253.mm.2	Gda
TC1200000280.mm.2	Gdap10
TC0700004176.mm.2	Gde1
TC1200000498.mm.2	Gemin2
TC0700004221.mm.2	Gga2
TC0600002324.mm.2	Ggct
TC1100000994.mm.2	Ggt6
TC0100000971.mm.2	Gin1
TC0X00000973.mm.2	Gjb1
TC1100000954.mm.2	Gltpd2
TC0900003002.mm.2	Glyctk
TC1400000825.mm.2	Gm10094; Sap18; Mir3077
TC0700002954.mm.2	Gm10109
TC0800000072.mm.2	Gm10217
TC0200004589.mm.2	Gm10762
TC1900000637.mm.2	Gm10768; Abcc2
TC0200002722.mm.2	Gm11007; 0610010B08Rik
TC0200002724.mm.2	Gm11007; Gm14308
TC0200005347.mm.2	Gm11009
TC1100003409.mm.2	Gm11437
TC1100000681.mm.2	Gm12250
TC0400004199.mm.2	Gm13212
TC0200002737.mm.2	Gm14288; Gm14435
TC0200002719.mm.2	Gm14288; Gm14440
TC0200002741.mm.2	Gm14295
TC0200005354.mm.2	Gm14296
TC0200005489.mm.2	Gm14306
TC0200005349.mm.2	Gm14308
TC0200005350.mm.2	Gm14308
TC0200002753.mm.2	Gm14327
TC0200005334.mm.2	Gm14391; Gm6710
TC0200005328.mm.2	Gm14393
TC0200005331.mm.2	Gm14399
TC0200002749.mm.2	Gm14403
TC0200005360.mm.2	Gm14410; Gm14411; Gm14413
TC0200005364.mm.2	Gm14412
TC0200005365.mm.2	Gm14418
TC0200005491.mm.2	Gm14419
TC0200002748.mm.2	Gm14420
TC0200002720.mm.2	Gm14431; Gm8898
TC0200005341.mm.2	Gm14431; Gm8898
TC0200005339.mm.2	Gm14434; 0610010B08Rik; Gm4724
TC0200002721.mm.2	Gm14436; Gm8923
TC0200005342.mm.2	Gm14440; Gm14288
TC1400002010.mm.2	Gm17078
TC0900002778.mm.2	Gm17530
TC0900001764.mm.2	Gm17571
TC1400000494.mm.2	Gm1821
TC0200005346.mm.2	Gm2004
TC0200002731.mm.2	Gm2026
TC0200005081.mm.2	Gm20267
TC0Y00000254.mm.2	Gm20825
TC0100002025.mm.2	Gm2710; Gm10075
TC1900000249.mm.2	Gm4952
TC0X00001403.mm.2	Gm5643
TC0200002729.mm.2	Gm6710; Gm14391
TC0600001317.mm.2	Gm7292
TC0900001017.mm.2	Gm7972
TC0200002738.mm.2	Gm8898; Gm14431
TC0200005344.mm.2	Gm8898; Gm14431
TC1100000606.mm.2	Gm9945
TC0300002731.mm.2	Gnai3
TC0400002549.mm.2	Gne
TC0600000775.mm.2	Gng12
TC1400001665.mm.2	Gnl3; Snord19
TC1000001493.mm.2	Gns
TC0800001883.mm.2	Gpat4
TC1700001188.mm.2	Gpatch11
TC0200004676.mm.2	Gpcpd1
TC0500001673.mm.2	Gpr146; D830046C22Rik
TC0200003753.mm.2	Gpr155
TC0800000991.mm.2	Gpt2
TC0200003654.mm.2	Grb14
TC0100003603.mm.2	Grem2
TC1800001429.mm.2	Grpel2
TC0200004965.mm.2	Gss
TC0300002728.mm.2	Gstm4
TC1000002383.mm.2	Gstt1
TC0900000923.mm.2	Gtf2a2
TC0300001449.mm.2	Gtf2b
TC1300001419.mm.2	Gtpbp4
TC0500003313.mm.2	Gusb
TC0600003374.mm.2	Gys2
TC0400004058.mm.2	H6pd
TC0200002990.mm.2	Hacd1
TC0900002503.mm.2	Hacd3
TC1400002859.mm.2	Hacl1
TC1000001133.mm.2	Hal
TC1200001601.mm.2	Hbp1
TC1100003829.mm.2	Hdac5; Mir8101
TC0200005438.mm.2	Helz2
TC0800001106.mm.2	Herpud1
TC0900001927.mm.2	Herpud2
TC0300000948.mm.2	Hfe2
TC0900002155.mm.2	Hinfp
TC1000001946.mm.2	Hint3
TC1300000258.mm.2	Hist1h1c
TC1300000181.mm.2	Hist1h2ao; Hist1h2ap; Hist1h2ai; Hist1h2ah
TC1300001565.mm.2	Hist1h2ap
TC1300001645.mm.2	Hist1h4a
TC1400002023.mm.2	Hnrnpc
TC0700000513.mm.2	Hnrnpl
TC0700003614.mm.2	Homer2
TC0400000963.mm.2	Hook1
TC0700004525.mm.2	Hras
TC0500002882.mm.2	Hsd17b11
TC0800001410.mm.2	Hsd17b2
TC1800000509.mm.2	Hsd17b4
TC0700004630.mm.2	Hsd3b7
TC1200002389.mm.2	Hsp90aa1
TC1200000679.mm.2	Hspa2
TC0300000307.mm.2	Hspa4l
TC0500001590.mm.2	Hspb1
TC0500003116.mm.2	Hspb8
TC0100002354.mm.2	Hspd1
TC0100000395.mm.2	Hspe1
TC0500003660.mm.2	Hsph1
TC1800000641.mm.2	Htr4
TC1100000496.mm.2	Ifi47; Olfr56
TC1200001663.mm.2	Ifrd1
TC0900001377.mm.2	Ifrd2
TC0900000523.mm.2	Ift46
TC1700000355.mm.2	Igfals
TC1600000564.mm.2	Igsf11
TC0100001610.mm.2	Igsf8
TC0200000222.mm.2	Il15ra
TC0900000194.mm.2	Ilf3
TC0900001414.mm.2	Impdh2
TC0600002326.mm.2	Inmt
TC0700004573.mm.2	Ins2
TC0700001673.mm.2	Insc
TC0100002969.mm.2	Insig2
TC1400001314.mm.2	Ipo5
TC1300002463.mm.2	Iqgap2
TC1100004266.mm.2	Irgm2
TC0200002359.mm.2	Itch
TC0600001193.mm.2	Itpr1
TC0100001351.mm.2	Ivns1abp
TC0300000322.mm.2	Jade1
TC1300000514.mm.2	Jarid2
TC1000000626.mm.2	Jmjd1c
TC1700000391.mm.2	Jmjd8
TC0600002500.mm.2	Kcmf1
TC0700004580.mm.2	Kcnq1ot1
TC0600002116.mm.2	Kdm7a
TC0500000306.mm.2	Khk
TC1400000797.mm.2	Khnyn
TC1700002344.mm.2	Khsrp
TC1500002071.mm.2	Kif21a
TC0X00003032.mm.2	Kir3dl2
TC0700003406.mm.2	Klf13
TC1900000373.mm.2	Klf9
TC1600000266.mm.2	Klhl24
TC1400001990.mm.2	Klhl33
TC0800002144.mm.2	Klkb1; Cyp4v3
TC0200000740.mm.2	Kynu
TC0700003719.mm.2	l7Rn6
TC0500000488.mm.2	Lap3
TC1100000674.mm.2	Larp1
TC1300000050.mm.2	Larp4b
TC1100001550.mm.2	Lasp1
TC1000000048.mm.2	Lats1
TC0500002346.mm.2	Lcorl
TC1400001054.mm.2	Lcp1
TC0900000204.mm.2	Ldlr
TC1800000714.mm.2	Ldlrad4
TC1100002728.mm.2	Leap2
TC0400001038.mm.2	Leprot
TC1100003314.mm.2	Lgals9
TC1100002314.mm.2	Lgalsl
TC1800001595.mm.2	Lipg
TC1600002178.mm.2	Litaf
TC1000001480.mm.2	Llph
TC1400001177.mm.2	Lmo7
TC0600002013.mm.2	Lncpint
TC0500003619.mm.2	Lnx2
TC0800001003.mm.2	Lonp2
TC0800002060.mm.2	Lonrf1
TC0X00000319.mm.2	Lonrf3
TC1700001132.mm.2	Lpin2
TC0800000707.mm.2	Lpl
TC0200001377.mm.2	Lrp4
TC1900000882.mm.2	Lrp5
TC0600003302.mm.2	Lrp6
TC0700003448.mm.2	Lrrc28
TC1000002436.mm.2	Lrrc3
TC1600000538.mm.2	Lrrc58
TC0600003145.mm.2	Ltbr
TC1500001727.mm.2	Ly6i
TC0400001925.mm.2	Mad2l2
TC0200005052.mm.2	Mafb
TC0X00002825.mm.2	Magt1
TC1500000388.mm.2	Mal2
TC1700001062.mm.2	Man2a1
TC1100001841.mm.2	Map2k6
TC1700000484.mm.2	Mapk14
TC1900000610.mm.2	Marveld1
TC1600001395.mm.2	Masp1
TC0600002491.mm.2	Mat2a
TC1800000762.mm.2	Mbd2
TC0200000783.mm.2	Mbd5
TC1400000413.mm.2	Mbl1
TC1800001280.mm.2	Mcc
TC0200002869.mm.2	Mcm10
TC0800000010.mm.2	Mcoln1
TC1000001374.mm.2	Mdm1
TC1100003687.mm.2	Med24
TC0200001935.mm.2	Mertk
TC0700001203.mm.2	Mesdc2
TC0600000131.mm.2	Met
TC0400003475.mm.2	Mfsd2a
TC1600000038.mm.2	Mgrn1
TC1200000502.mm.2	Mia2
TC0100003725.mm.2	Mia3
TC1800000084.mm.2	Mib1
TC0700001644.mm.2	Mical2
TC1100000975.mm.2	Mis12
TC0100002210.mm.2	Mitd1
TC1000002509.mm.2	Mknk2
TC0500001575.mm.2	Mlxipl
TC0800002516.mm.2	Mmaa
TC0300000500.mm.2	Mme
TC0X00002266.mm.2	Mmgt1; Mir5116
TC1000001621.mm.2	Mmp19
TC1100000021.mm.2	Morc2a
TC1600000168.mm.2	Mpv17l
TC0100003449.mm.2	Mpzl1
TC1600000988.mm.2	Mrap
TC0900002921.mm.2	Mras
TC0100002552.mm.2	Mreg
TC0800000790.mm.2	Mrpl34
TC1300000881.mm.2	Mrpl36
TC1500000398.mm.2	Mtbp
TC1000000015.mm.2	Mthfd1l
TC0X00000649.mm.2	Mtm1
TC0700000978.mm.2	Mtmr10
TC1100001345.mm.2	Mtmr4
TC0400001930.mm.2	Mtor
TC1300002269.mm.2	Mtrr
TC1500001585.mm.2	Mtss1
TC1400000316.mm.2	Mustn1
TC1600001092.mm.2	Mx2
TC1500000160.mm.2	Myo10
TC0100002308.mm.2	Myo1b
TC1600000650.mm.2	Naa50
TC0300001719.mm.2	Naaladl2
TC0100002319.mm.2	Nab1
TC0100002305.mm.2	Nabp1
TC1500001942.mm.2	Naga
TC1100001681.mm.2	Nags
TC1200000279.mm.2	Nampt
TC1100002062.mm.2	Narf
TC0100000467.mm.2	Nbeal1
TC0200003837.mm.2	Nckap1
TC0100002739.mm.2	Ncl
TC0700000014.mm.2	Ndufa3
TC0400000212.mm.2	Ndufaf4
TC1800000665.mm.2	Nedd4l
TC1600000659.mm.2	Nepro
TC1300001374.mm.2	Net1
TC1300002013.mm.2	Nfil3
TC1200001768.mm.2	Nfkbia
TC0400000354.mm.2	Nfx1
TC0100002764.mm.2	Ngef
TC1100003593.mm.2	Ngfr
TC1900000801.mm.2	Nhlrc2
TC0100001502.mm.2	Nme7
TC1900000320.mm.2	Nmrk1
TC0500002650.mm.2	Noa1
TC0300000354.mm.2	Noct
TC1300002036.mm.2	Nop16
TC0600001448.mm.2	Nop2
TC0200001972.mm.2	Nop56; Snord57
TC0100000456.mm.2	Nop58
TC0100000282.mm.2	Npas2
TC1800000994.mm.2	Npc1
TC0900000737.mm.2	Nptn
TC0400001612.mm.2	Nr0b2
TC1100003688.mm.2	Nr1d1
TC1400001499.mm.2	Nr1d2
TC0100001579.mm.2	Nr1i3
TC0400000529.mm.2	Nr4a3
TC0900002332.mm.2	Nrg4
TC0400002153.mm.2	Nsmaf
TC1400000322.mm.2	Nt5dc2
TC0100001178.mm.2	Nucks1
TC0500001351.mm.2	Oas1h
TC1200000142.mm.2	Odc1
TC0800001089.mm.2	Ogfod1
TC0100002063.mm.2	Ogfrl1
TC0200003751.mm.2	Ola1
TC0200003492.mm.2	Orc4
TC0700003831.mm.2	P2ry2
TC1000000531.mm.2	P4ha1
TC1000001063.mm.2	Pah
TC0800002300.mm.2	Palld
TC0300002815.mm.2	Palmd
TC0400001641.mm.2	Paqr7
TC0200002184.mm.2	Pax1
TC1500001102.mm.2	Pcbp2
TC1900000517.mm.2	Pcgf5
TC0200002683.mm.2	Pck1
TC0100000027.mm.2	Pcmtd1
TC0600002635.mm.2	Pcyox1
TC1600000443.mm.2	Pcyt1a
TC0700001669.mm.2	Pde3b
TC1700000535.mm.2	Pde9a
TC0300000631.mm.2	Pdgfc
TC1000002453.mm.2	Pdxk
TC0300000958.mm.2	Pdzk1
TC0400001217.mm.2	Pdzk1ip1
TC1100000205.mm.2	Peli1
TC1100000900.mm.2	Per1
TC0100002801.mm.2	Per2
TC0400004074.mm.2	Per3
TC0700003568.mm.2	Pex11a
TC0600001366.mm.2	Pex26
TC0X00001502.mm.2	Pfkfb1
TC0200002961.mm.2	Pfkfb3
TC0100002349.mm.2	Pgap1
TC0800002400.mm.2	Pgpep1
TC1100001467.mm.2	Phb
TC1500001932.mm.2	Phf5a
TC0X00001634.mm.2	Phka2
TC1600001667.mm.2	Phldb2
TC1800000825.mm.2	Pias2
TC0700001275.mm.2	Picalm
TC0100002690.mm.2	Pid1
TC1600000424.mm.2	Pigz
TC1900001506.mm.2	Pik3ap1
TC1300002553.mm.2	Pik3r1
TC0X00000990.mm.2	Pin4
TC1000003105.mm.2	Pip4k2c
TC0X00001665.mm.2	Pir
TC1100003948.mm.2	Pitpnc1
TC0500003249.mm.2	Pitpnm2
TC1000000534.mm.2	Pla2g12b
TC0800001244.mm.2	Pla2g15
TC1900000141.mm.2	Pla2g16
TC0200001134.mm.2	Plekha3
TC0600000655.mm.2	Plekha8
TC0400003361.mm.2	Plk3
TC1300001270.mm.2	Plpp1
TC0100001877.mm.2	Plxna2
TC1200000500.mm.2	Pnn
TC1400000574.mm.2	Pnp
TC0700002053.mm.2	Pnpla2
TC0400002373.mm.2	Pnrc1
TC0400003773.mm.2	Pnrc2
TC1600001607.mm.2	Poglut1
TC0600002548.mm.2	Pole4
TC0600000839.mm.2	Polr1a
TC0700000554.mm.2	Polr2i
TC1500001933.mm.2	Polr3h
TC1300000187.mm.2	Pom121l2
TC0200000572.mm.2	Pomt1
TC0500001584.mm.2	Por
TC0700002623.mm.2	Pou2f2; Mir6537
TC0800002508.mm.2	Pou4f2
TC1500000821.mm.2	Ppara
TC0500002642.mm.2	Ppat
TC0300000623.mm.2	Ppid
TC1200000626.mm.2	Ppm1a
TC1000000002.mm.2	Ppp1r14c
TC0100001202.mm.2	Ppp1r15b
TC0800000424.mm.2	Ppp1r3b
TC1900001445.mm.2	Ppp1r3c
TC1000000422.mm.2	Prep
TC0100000055.mm.2	Prex2
TC1700002562.mm.2	Prkd3
TC0700001372.mm.2	Prkrir
TC0700000904.mm.2	Prmt3
TC1600001304.mm.2	Prodh
TC0200002863.mm.2	Prpf18
TC0700004628.mm.2	Prr14
TC0200004251.mm.2	Prrg4
TC0100003664.mm.2	Psen2
TC0700004135.mm.2	Psma1
TC1100001206.mm.2	Psmd11
TC1100001578.mm.2	Psmd3
TC1300000815.mm.2	Ptdss1
TC0100002121.mm.2	Ptp4a1; Gm13363
TC0700002507.mm.2	Pvr
TC1000002443.mm.2	Pwp2
TC1300001789.mm.2	Pxdc1
TC0700002615.mm.2	Rabac1
TC1100003478.mm.2	Rad51c
TC0100003323.mm.2	Ralgps2
TC1500000062.mm.2	Ranbp3l
TC1400001306.mm.2	Rap2a
TC0200001049.mm.2	Rapgef4
TC0700002186.mm.2	Rasl2-9
TC1200000788.mm.2	Rbm25
TC0600001970.mm.2	Rbm28
TC0500000263.mm.2	Rbm33
TC0200003607.mm.2	Rbms1
TC0800002012.mm.2	Rbpms
TC1600002094.mm.2	Rcan1
TC1900000432.mm.2	Rcl1
TC0500002461.mm.2	Rell1
TC0400001975.mm.2	Rere
TC1100003369.mm.2	Rffl
TC1000001024.mm.2	Rfx4
TC0800002385.mm.2	Rfxank
TC0400000442.mm.2	Rgp1
TC0100001381.mm.2	Rgs16
TC1800000098.mm.2	Riok3
TC0400002251.mm.2	Ripk2
TC0300000736.mm.2	Rit1
TC1400000576.mm.2	Rnase10
TC0800002596.mm.2	Rnaseh2a
TC1400000877.mm.2	Rnaseh2b
TC1500002183.mm.2	Rnd1
TC1800000160.mm.2	Rnf125
TC1200001549.mm.2	Rnf144a
TC1100000440.mm.2	Rnf145
TC1100002836.mm.2	Rnf187
TC0400001510.mm.2	Rnf19b
TC0400003369.mm.2	Rnf220
TC0400002551.mm.2	Rnf38
TC1700001918.mm.2	Rnf5
TC0300000864.mm.2	Rorc
TC1000002041.mm.2	Rpf2
TC0X00000704.mm.2	Rpl10; Snora70
TC0300002946.mm.2	Rpl34; Rpl34-ps1
TC1200002527.mm.2	Rpl36al
TC1700002191.mm.2	Rpl7l1
TC1400000075.mm.2	Rpp14
TC0200002844.mm.2	Rpp38
TC1800001081.mm.2	Rprd1a
TC1000003155.mm.2	Rps26
TC0900000876.mm.2	Rps27l
TC0700003798.mm.2	Rps3; Snord15b
TC0700003988.mm.2	Rrp8
TC1600001213.mm.2	Rsl1d1
TC0900003122.mm.2	Rtp3
TC0400001651.mm.2	Runx3
TC0300002836.mm.2	Rwdd3
TC0800000550.mm.2	Rwdd4a
TC0200000477.mm.2	Rxra
TC0300000853.mm.2	S100a10
TC0300000802.mm.2	S100a16
TC0300002797.mm.2	S1pr1
TC1200001880.mm.2	Sav1
TC0700004095.mm.2	Sbf2
TC1300002445.mm.2	Scamp1
TC0900001459.mm.2	Scap
TC0500002760.mm.2	Scarb2
TC1500002052.mm.2	Sco2; Tymp
TC0800002552.mm.2	Scoc
TC1900000983.mm.2	Scyl1
TC0200005114.mm.2	Sdc4
TC1000001577.mm.2	Sdr9c7
TC1800000682.mm.2	Sec11c
TC1100000032.mm.2	Sec14l4
TC1200001813.mm.2	Sec23a
TC0100002645.mm.2	Serpine2
TC1100003224.mm.2	Serpinf2
TC0500001410.mm.2	Setd1b
TC1900000705.mm.2	Sfxn2
TC1900001390.mm.2	Sgms1
TC1200001939.mm.2	Sgpp1
TC0900001099.mm.2	Sh3bgrl2
TC0300000675.mm.2	Sh3d19
TC0300003077.mm.2	Sh3glb1
TC1900001630.mm.2	Sh3pxd2a
TC1200000258.mm.2	Sh3yl1
TC0400002479.mm.2	Sigmar1
TC0900000550.mm.2	Sik3
TC1500001192.mm.2	Skp2
TC0800002844.mm.2	Slc12a4
TC1100003296.mm.2	Slc13a2
TC0300001076.mm.2	Slc16a1
TC1900001425.mm.2	Slc16a12
TC0X00002783.mm.2	Slc16a2
TC1000003078.mm.2	Slc16a7
TC1300000266.mm.2	Slc17a3
TC1000000191.mm.2	Slc18b1
TC0200001524.mm.2	Slc1a2
TC0700000236.mm.2	Slc1a5
TC0200001951.mm.2	Slc20a1
TC1300001784.mm.2	Slc22a23
TC0200004667.mm.2	Slc23a2
TC0600001813.mm.2	Slc25a13
TC0800001867.mm.2	Slc25a15
TC1000002668.mm.2	Slc25a3
TC1400002310.mm.2	Slc25a37
TC0300002311.mm.2	Slc25a44
TC0500002953.mm.2	Slc26a1
TC1700002152.mm.2	Slc29a1
TC0300000180.mm.2	Slc2a2
TC0400001970.mm.2	Slc2a5
TC0100001788.mm.2	Slc30a10
TC0500000536.mm.2	Slc34a2
TC1100001460.mm.2	Slc35b1
TC0600002044.mm.2	Slc35b4
TC0400003172.mm.2	Slc35d1
TC0900000509.mm.2	Slc37a4
TC1500002142.mm.2	Slc38a2
TC0900003040.mm.2	Slc38a3
TC0100002285.mm.2	Slc40a1
TC0100001180.mm.2	Slc45a3
TC0500000819.mm.2	Slc4a4
TC0500001338.mm.2	Slc8b1
TC1100001886.mm.2	Slc9a3r1
TC1700001634.mm.2	Slc9a3r2
TC0200002587.mm.2	Slc9a8
TC1800000816.mm.2	Smad2
TC1500002246.mm.2	Smagp
TC0100002067.mm.2	Smap1
TC1900000409.mm.2	Smarca2
TC0500003585.mm.2	Smurf1
TC0900001635.mm.2	Snrk
TC1500001090.mm.2	Soat2
TC1600001008.mm.2	Son
TC1900001485.mm.2	Sorbs1
TC0200001843.mm.2	Sord
TC0300001137.mm.2	Sort1
TC1200001869.mm.2	Sos2
TC0700004148.mm.2	Sox6
TC1100001853.mm.2	Sox9
TC1400000851.mm.2	Spata13
TC0300000831.mm.2	Sprr2k
TC1100002664.mm.2	Sqstm1
TC1100002869.mm.2	Srebf1; Mir6922
TC0600002904.mm.2	Srgap3
TC0400001934.mm.2	Srm
TC1500001658.mm.2	St3gal1
TC0400003383.mm.2	St3gal3
TC0600000841.mm.2	St3gal5
TC0700004076.mm.2	St5
TC1600000335.mm.2	St6gal1
TC0700001430.mm.2	Stard10
TC0700001198.mm.2	Stard5
TC1100001632.mm.2	Stat5a
TC1100003787.mm.2	Stat5b
TC0500000877.mm.2	Stbd1
TC1900001031.mm.2	Stip1
TC0100000655.mm.2	Stk16
TC0200003362.mm.2	Stom
TC0400000496.mm.2	Stra6l
TC0600001636.mm.2	Strap
TC0500003297.mm.2	Stx2
TC1900001085.mm.2	Stxbp3-ps
TC1100003532.mm.2	Stxbp4
TC1900000700.mm.2	Sufu
TC1700002287.mm.2	Sult1c2
TC0500002699.mm.2	Sult1d1
TC0700000168.mm.2	Sult2a5
TC1000003158.mm.2	Suox
TC1900000017.mm.2	Suv420h1
TC0100003253.mm.2	Swt1
TC1700000047.mm.2	Synj2
TC1000001704.mm.2	Tab2
TC1700002207.mm.2	Taf8
TC0700004302.mm.2	Taok2
TC1500001214.mm.2	Tars
TC0800001307.mm.2	Tat
TC0600001259.mm.2	Tatdn2
TC0200002279.mm.2	Tbc1d20
TC1700001606.mm.2	Tceb2
TC1900000888.mm.2	Tcirg1
TC1000001020.mm.2	Tcp11l2
TC1200000988.mm.2	Tdp1
TC1500000731.mm.2	Tef
TC0800002188.mm.2	Tenm3
TC0900003199.mm.2	Tgfbr2
TC0500002919.mm.2	Tgfbr3
TC1400002098.mm.2	Tgm1
TC0600002492.mm.2	Tgoln1; Tgoln2
TC1400001470.mm.2	Thoc7
TC1100001580.mm.2	Thra
TC0400003530.mm.2	Thrap3
TC0700003764.mm.2	Thrsp
TC0800000271.mm.2	Thsd1
TC0600000718.mm.2	Tigd2
TC0200001223.mm.2	Timm10
TC0X00002993.mm.2	Timm8a1
TC1000001044.mm.2	Timp3
TC1000002535.mm.2	Tjp3
TC1100004147.mm.2	Tk1
TC1100004270.mm.2	Tlcd2
TC0400002854.mm.2	Tle1
TC1900001505.mm.2	Tm9sf3
TC0600002966.mm.2	Tmcc1
TC0400001738.mm.2	Tmco4
TC1800000342.mm.2	Tmco6
TC0500002940.mm.2	Tmed5
TC0500001408.mm.2	Tmem120b
TC0600000849.mm.2	Tmem150a
TC1900000693.mm.2	Tmem180
TC0100001076.mm.2	Tmem185b
TC0200005516.mm.2	Tmem189
TC1000002900.mm.2	Tmem19
TC0400001574.mm.2	Tmem200b
TC0900000358.mm.2	Tmem218
TC0700004303.mm.2	Tmem219
TC1000002487.mm.2	Tmem259
TC0400002873.mm.2	Tmem261
TC1200001921.mm.2	Tmem30b
TC0100002963.mm.2	Tmem37
TC0400003747.mm.2	Tmem57
TC0300002306.mm.2	Tmem79
TC1100003300.mm.2	Tmem97
TC0900003119.mm.2	Tmie
TC1000002794.mm.2	Tmtc2
TC1200001237.mm.2	Tnfaip2
TC1400000324.mm.2	Tnnc1
TC1300002510.mm.2	Tnpo1
TC1500000705.mm.2	Tnrc6b; Mir5113
TC1500001088.mm.2	Tns2
TC1100002871.mm.2	Tom1l2
TC0200002452.mm.2	Top1
TC0200000545.mm.2	Tor1b
TC0400002159.mm.2	Tox
TC0600002240.mm.2	Tra2a
TC0100002038.mm.2	Tram2
TC0200004896.mm.2	Trib3
TC0600000362.mm.2	Trim24
TC1200001916.mm.2	Trmt5
TC0200004543.mm.2	Trpm7
TC1400001070.mm.2	Tsc22d1
TC0300000453.mm.2	Tsc22d2
TC0X00003075.mm.2	Tsc22d3
TC0700003044.mm.2	Tsg101
TC0700003778.mm.2	Tsku
TC0600001917.mm.2	Tspan12
TC1400001783.mm.2	Tspan14
TC0700002056.mm.2	Tspan4
TC1500001831.mm.2	Tst
TC0400002290.mm.2	Tstd3
TC0700001005.mm.2	Ttc23
TC0400002945.mm.2	Ttc39b
TC0400000168.mm.2	Ttpa
TC1300001779.mm.2	Tubb2a
TC1300001781.mm.2	Tubb2b
TC1700000050.mm.2	Tulp4
TC0200003174.mm.2	Ubac1
TC0400002460.mm.2	Ubap2
TC1100000801.mm.2	Ubb; Gm1821
TC0600001992.mm.2	Ube2h
TC0400001017.mm.2	Ube2u
TC1700002199.mm.2	Ubr2
TC1900000162.mm.2	Ubxn1
TC0200003298.mm.2	Uck1
TC0100003477.mm.2	Uck2
TC0500002486.mm.2	Ugdh
TC1100002324.mm.2	Ugp2
TC0500002695.mm.2	Ugt2a3
TC0500002688.mm.2	Ugt2b34
TC0500000791.mm.2	Ugt2b35
TC0500003000.mm.2	Ulk1
TC0300001494.mm.2	Uox
TC0200000879.mm.2	Upp2
TC0500003625.mm.2	Urad
TC1600002056.mm.2	Urb1
TC0700002784.mm.2	Usf2
TC0900000497.mm.2	Usp2
TC1100002904.mm.2	Usp22
TC0600002484.mm.2	Usp39
TC0900001403.mm.2	Usp4
TC0500001842.mm.2	Uspl1
TC0700003790.mm.2	Uvrag
TC0300002802.mm.2	Vcam1
TC1100000592.mm.2	Vdac1
TC1000002702.mm.2	Vezt; Mir331
TC0900001621.mm.2	Vipr1
TC0500001517.mm.2	Vkorc1l1
TC1300001604.mm.2	Vmn1r210
TC1700000604.mm.2	Vps52
TC0100002411.mm.2	Wdr12
TC1700001138.mm.2	Wdr43
TC0X00000064.mm.2	Wdr45
TC0100000351.mm.2	Wdr75
TC1100003225.mm.2	Wdr81
TC0600002056.mm.2	Wdr91
TC0700001624.mm.2	Wee1
TC0100000071.mm.2	Xkr9
TC0X00003428.mm.2	Xlr5c
TC1700000882.mm.2	Xpo5
TC0700004265.mm.2	Xpo6
TC0200002178.mm.2	Xrn2
TC1100003462.mm.2	Ypel2
TC0200001053.mm.2	Zak
TC0100003093.mm.2	Zbed6; Zc3h11a
TC0300000054.mm.2	Zbtb10
TC1600002160.mm.2	Zbtb21
TC0900003299.mm.2	Zdhhc3
TC0X00002158.mm.2	Zdhhc9
TC1700000513.mm.2	Zfand3
TC1700001870.mm.2	Zfp101
TC0200005518.mm.2	Zfp512b
TC1300002240.mm.2	Zfp708; Rslcan18
TC0700000733.mm.2	Zfp788
TC1700001855.mm.2	Zfp870
TC0200005383.mm.2	Zfp931
TC0500001128.mm.2	Zfp932
TC1200001982.mm.2	Zfyve26
TC0400003253.mm.2	Zfyve9
TC1400002132.mm.2	Zmym5
TC0200005181.mm.2	Znfx1
TC1100003421.mm.2	Znhit3
TC1700002042.mm.2	Znrd1
TC1100002134.mm.2	Znrf3
TC0300001576.mm.2	Zranb2

## Sheet: Sheet 4
Category	Term	Count	%	PValue	Genes	List Total	Pop Hits	Pop Total
GOTERM_BP_DIRECT	GO:0055114~oxidation-reduction process	115	4.93562	2.34436e-07	STEAP3, KDM1B, GLDC, NDUFA10, OGFOD3, CYP3A13, H2-KE6, MSMO1, ERO1L, TXN2, NSDHL, OGFOD2, DIO2, P3H1, MTHFD1, GPD2, ND1, UPK3BL, ND3, STEAP2, HPD, ALDH7A1, GCDH, MAOB, UQCRB, NDUFB10, UQCRH, HSD11B1, ADH1, PRDX5, RDH10, AGMO, CYC1, NDUFV3, DECR2, TXNDC8, NDUFV2, SRD5A3, MTHFR, MINA, COQ7, PRDX6, CYP51, CYP4F14, DHFR, SQLE, P4HA2, FASN, DNAJC10, OGDH, CYCS, NOX4, DUS1L, PHF2, HIBADH, ETFB, AIFM3, …	1908	676	18082
GOTERM_BP_DIRECT	GO:0006629~lipid metabolic process	79	3.39056	1.41883e-05	LPGAT1, ACSM1, MOGAT1, HDLBP, PCSK9, H2-KE6, ACSM5, MSMO1, ACSM4, GBA2, LCLAT1, LIPA, AACS, PRKAG3, OSBPL10, NSDHL, CERS6, GPX1, DGAT2, ACSL1, ELOVL3, ELOVL6, ACSL4, BAAT, PRKAB1, LSS, ACLY, PLCB3, ACOX2, ANGPTL8, PLCB1, MGLL, SLC27A5, PLIN5, AKR1D1, ACAA1B, OMA1, SGMS2, HMGCR, HSD17B7, ACNAT2, PLD1, ACNAT1, ACACB, ACACA, NEU2, HSD11B1, NEU3, UGCG, SGPL1, FAM213B, THEM4, PLAGL2, PRLH, APOE, PLCG1…	1908	459	18082
GOTERM_BP_DIRECT	GO:0008380~RNA splicing	48	2.06009	2.31157e-05	ISY1, ZCCHC8, DDX5, RBM25, RBM8A, DDX47, SF3B6, U2AF1, AKAP17B, YBX1, IWS1, PQBP1, LSM10, PTBP1, C1QBP, TRA2B, SNRPB2, HNRNPA1, SF3B1, SRRM2, SF3A3, PPIL1, MBNL1, ZFP638, NCBP2, NONO, ECD, TFIP11, PRPF4B, ZCRB1, THOC5, PTBP2, SRPK1, SRRM1, HNRNPK, SNW1, LSM6, ESRP2, SRSF3, LUC7L3, SNRNP27, RBMY, NSRP1, CDK13, TARDBP, SKIV2L2, SF1, ZPR1	1908	241	18082
GOTERM_BP_DIRECT	GO:0006810~transport	242	10.3863	7.70546e-05	KDELR1, AQP8, SLC4A1, RABGEF1, RINL, AKT1, ATP6V1E1, ATG3, ATP6V1G1, STARD4, COG7, NUP210, SLC35C2, COG4, SCAMP3, SLC5A6, DOPEY2, RBP4, ORAI1, VDAC2, NUP98, ATP5S, ABCB6, STXBP3, SAR1B, SLC35D3, STXBP2, ATP5K, ATP5H, ATP5O, SLC5A3, ATP5L, SEC14L2, SNX2, LCN12, ATP5D, VTI1A, SNX9, NUP88, APOE, SLC19A1, SNX5, RAB11FIP4, VTI1B, TMEM184B, SLC10A1, SLC35E1, PARP11, EHD3, FAM160A2, SLC6A9, STAR, 583047…	1908	1822	18082
GOTERM_BP_DIRECT	GO:0008152~metabolic process	74	3.17597	0.000296183	LPGAT1, ACSM1, ACSM5, ACSM4, GBA2, LCLAT1, AACS, 6430573F11RIK, NADK2, AUH, ENPP3, TKTL2, PDHX, ARSA, TPI1, ACSL1, GAA, PGAM1, ACSL4, CDYL, HDHD3, CDYL2, ACLY, NEIL2, ACOX2, MTHFD1, ALDH1A1, PGP, AMY1, LYG2, UMPS, FBP1, ASPA, ALDH7A1, GART, SPAM1, SLC27A5, GCDH, DLST, ACAA1B, PDHB, NT5C2, ACAT3, ACACB, ACACA, ACAT2, NEU2, NEU3, TKFC, WBSCR22, UGT3A1, METTL7B, MGEA5, XRCC6, CENPV, FAHD1, PKLR, PNP…	1908	463	18082
GOTERM_BP_DIRECT	GO:0006120~mitochondrial electron transport, NADH to ubiquinone	7	0.300429	0.000718473	NDUFB9, NDUFA7, BDNF, NDUFS6, NDUFA10, NDUFC2, NDUFV2	1908	12	18082
GOTERM_BP_DIRECT	GO:0007030~Golgi organization	19	0.815451	0.00122808	BCAS3, RAB1A, COG7, UBXN2A, COG4, GBF1, CSNK1D, SYNE1, VMP1, RAB43, ARHGAP21, VCPIP1, LMAN1, BAG5, GORASP1, LMAN2, MYO18A, PLEKHM2, OPTN	1908	79	18082
GOTERM_BP_DIRECT	GO:0007040~lysosome organization	12	0.515021	0.00178405	MBTPS1, FAM160A2, SNAPIN, HOOK2, AKTIP, GAA, ZKSCAN3, ACP2, LYST, CLN6, CLN5, CHMP5	1908	39	18082
GOTERM_BP_DIRECT	GO:0045725~positive regulation of glycogen biosynthetic process	7	0.300429	0.00294434	EPM2AIP1, PTH, INSR, AKT1, IRS2, IGF1, GCK	1908	15	18082
GOTERM_BP_DIRECT	GO:0006749~glutathione metabolic process	13	0.55794	0.0041159	GSTK1, GPX1, GPX4, TXNRD3, GLO1, GSTT3, CTNS, SOD1, GSTZ1, NAT8, GSTA4, GSTA3, EEF1E1	1908	49	18082
GOTERM_BP_DIRECT	GO:0006734~NADH metabolic process	6	0.257511	0.00544099	MDH2, GPD2, OGDH, IDH3B, DLST, IDH3A	1908	12	18082
GOTERM_BP_DIRECT	GO:0006623~protein targeting to vacuole	5	0.214592	0.0060868	VPS13C, VPS41, VPS13A, VTI1A, VTI1B	1908	8	18082
GOTERM_BP_DIRECT	GO:0009267~cellular response to starvation	14	0.600858	0.00869284	KLF10, TCF7L2, CADPS2, WNT2B, USP33, PCSK9, CARTPT, MUP1, ZFYVE1, SIRT1, RRAGC, CTSL, PDK4, FOXA3	1908	60	18082
GOTERM_BP_DIRECT	GO:0008283~cell proliferation	36	1.54506	0.00879138	ENPEP, LRP1, PRKDC, PAK1IP1, IRS2, LIPA, TBX20, PIM1, MAP7, POC1B, PROK2, RAC1, NBN, GNAT1, FAM83A, PDK1, TCF7L2, SMAD4, GPX1, XRCC5, BAD, PTGES3, ECD, HTR1A, LIG4, IGF1, MINA, MIF, DICER1, TNFRSF1B, IRF2, TACC3, POLR3G, TACC2, TGFBI, CFB	1908	220	18082
GOTERM_BP_DIRECT	GO:1901998~toxin transport	10	0.429185	0.00881567	RAB43, DNAJA1, COPB2, CRTC2, MTMR12, TCP1, CCT8, VAMP4, CCT5, PTPRG	1908	35	18082
GOTERM_BP_DIRECT	GO:0051028~mRNA transport	18	0.772532	0.00979564	NUP210, RBM8A, NCBP2, THOC5, IWS1, LRPPRC, PARP11, NXF1, CPEB1, XPO1, NUP62, NUP35, SRSF3, NUP43, NUP88, NUP98, HNRNPA1, NUPL1	1908	88	18082
GOTERM_BP_DIRECT	GO:0016477~cell migration	32	1.37339	0.00992273	RAB1A, ENPEP, USP33, PTPRK, LAMC1, TREM3, PTPRF, CORO1B, FUT8, NUP62, MYO18A, RAC1, PLCG1, JAK3, HOXA5, JAK1, NDEL1, NCK1, TNK2, EMP2, SORBS2, TYK2, RHOA, VAV2, MMP14, RPS6KB1, PTK7, SNAI2, ELMO3, CD47, AVL9, DOCK1	1908	191	18082
GOTERM_BP_DIRECT	GO:0006544~glycine metabolic process	5	0.214592	0.010048	GLDC, SHMT1, GLYAT, BAAT, GART	1908	9	18082
GOTERM_BP_DIRECT	GO:2000811~negative regulation of anoikis	6	0.257511	0.011495	PIK3CA, PTRH2, CAV1, PDK4, SNAI2, ITGA5	1908	14	18082
GOTERM_BP_DIRECT	GO:0006979~response to oxidative stress	24	1.03004	0.0117757	CAR3, NQO1, BTG1, TOR1A, GPX1, GPX4, NDUFB4, COQ7, SIRT1, CYGB, SOD1, MMP14, PRDX5, NDUFS8, ERCC3, NAPRT, ALDH1A1, PPIF, AKT1, TXNIP, UPK3BL, APOE, ND3, CAMK2G	1908	133	18082
GOTERM_BP_DIRECT	GO:0009650~UV protection	5	0.214592	0.0153641	MFAP4, GPX1, ERCC3, SDF4, ERCC5	1908	10	18082
GOTERM_BP_DIRECT	GO:0015671~oxygen transport	5	0.214592	0.0153641	HBB-B2, HBB-B1, HBB-BT, HBB-BS, CYGB	1908	10	18082
GOTERM_BP_DIRECT	GO:0050905~neuromuscular process	8	0.343348	0.0155726	CHRNA1, ATXN2, AGTPBP1, OPA3, POMK, CACNA1A, STRA6, SPG20	1908	26	18082
GOTERM_BP_DIRECT	GO:0045667~regulation of osteoblast differentiation	6	0.257511	0.0157703	DDX5, UCMA, SMOC1, SNAI2, GLI1, PRKACA	1908	15	18082
GOTERM_BP_DIRECT	GO:0010033~response to organic substance	14	0.600858	0.0168737	CHUK, ACSL1, DNAAF2, ANXA5, SCAMP3, HDAC6, RELA, SOD1, SQLE, AKT1, EU599041, ACP2, LCT, GART	1908	65	18082
GOTERM_BP_DIRECT	GO:0032418~lysosome localization	6	0.257511	0.0209865	SNAPIN, BLOC1S1, KXD1, PLEKHM2, HDAC6, BORCS5	1908	16	18082
GOTERM_BP_DIRECT	GO:0006006~glucose metabolic process	14	0.600858	0.0240107	TCF7L2, TPI1, CREM, CACNA1A, OMA1, PDHB, USF1, GCK, FABP5, PIK3CA, ANGPTL8, PDK4, AKT1, PDK1	1908	68	18082
GOTERM_BP_DIRECT	GO:0051897~positive regulation of protein kinase B signaling	18	0.772532	0.024521	TCF7L2, GPX1, INSR, ITSN1, IGF1, MUP1, F3, MUP2, RASD2, C1QTNF3, MYDGF, C1QBP, RARA, GCNT2, NOX4, GM2023, RICTOR, CCL19	1908	97	18082
GOTERM_BP_DIRECT	GO:0000183~chromatin silencing at rDNA	12	0.515021	0.0266924	TAF1D, HDAC2, HIST1H4K, POLR1B, HIST1H4M, TAF1A, BEND3, UBTF, DNMT3B, POLR1E, HIST1H4J, SIRT1	1908	55	18082
GOTERM_BP_DIRECT	GO:0010867~positive regulation of triglyceride biosynthetic process	6	0.257511	0.0272093	TCF7L2, DGAT2, DGAT1, NR1H2, APOC3, PLIN5	1908	17	18082
GOTERM_BP_DIRECT	GO:0097009~energy homeostasis	6	0.257511	0.0272093	PM20D1, PIK3CA, SLC35D3, LEPR, OMA1, ACACB	1908	17	18082
GOTERM_BP_DIRECT	GO:0003148~outflow tract septum morphogenesis	7	0.300429	0.0347352	ACVR1, SMAD4, MSX2, TBX20, GATA6, RARA, NKX2-5	1908	24	18082
GOTERM_BP_DIRECT	GO:0045471~response to ethanol	20	0.858369	0.0372251	CAR3, ARSA, NQO1, MAOB, GK, BAD, PTH, HMGCR, SIRT1, RHOA, AACS, SOD1, RBP4, STAR, RPS6KB1, ALDH1A1, RARA, SDF4, LCT, BIRC2	1908	117	18082
GOTERM_BP_DIRECT	GO:0016055~Wnt signaling pathway	32	1.37339	0.0401597	INVS, DRAXIN, MACF1, CALCOCO1, WNT2B, TCF7, FRAT2, GRK5, LEO1, SOSTDC1, RSPO4, FBXW4, WWOX, TCF7L2, RNF43, WNT5B, FZD4, FZD6, KREMEN1, MIR27B, CSNK1D, DKK1, AES, PYGO1, DDB1, CYLD, CCNY, PTK7, CSNK2B, OTULIN, CSNK1G2, FERMT2	1908	213	18082
GOTERM_BP_DIRECT	GO:0016567~protein ubiquitination	50	2.14592	0.040462	KLHL36, WDSUB1, RNF14, BACH1, MED18, MED12, CDC20, MED10, TRIM2, TRIM3, AKT1, SKP1A, RNF111, HERC6, ATG3, RNF43, RNF44, WSB1, NSMCE2, FBXO15, MED27, SIRT1, PJA2, RNF168, RNF144B, CDC34, TRAF4, TRAF5, RNF166, UBE2CBP, UBA6, PELI2, ASB13, VCPIP1, FBXL21, FBXO40, ZNRF2, RAB40C, DCAF11, TRIM41, RNF24, KLHL25, WWP1, KLHL2, WWP2, UBE2A, FBXO33, KBTBD3, UBOX5, RFWD3	1908	362	18082
GOTERM_BP_DIRECT	GO:0021675~nerve development	5	0.214592	0.0404892	AFG3L2, NRP2, BDNF, CTSL, DICER1	1908	13	18082
GOTERM_BP_DIRECT	GO:0030212~hyaluronan metabolic process	5	0.214592	0.0404892	ITIH3, ITIH2, PIM1, AKT1, ITIH1	1908	13	18082
GOTERM_BP_DIRECT	GO:0042407~cristae formation	5	0.214592	0.0404892	AFG3L2, APOO, CHCHD3, SAMM50, OMA1	1908	13	18082
GOTERM_BP_DIRECT	GO:0055089~fatty acid homeostasis	5	0.214592	0.0404892	DGAT2, DGAT1, NR1H4, APOE, SIRT1	1908	13	18082
GOTERM_BP_DIRECT	GO:0070266~necroptotic process	5	0.214592	0.0404892	CYLD, PPIF, RIPK1, BIRC2, BIRC3	1908	13	18082
GOTERM_BP_DIRECT	GO:0006897~endocytosis	28	1.20172	0.0405736	RAB1A, LRP1, TFRC, USP33, ITSN1, SNX10, SNX30, LRP8, AP2A2, ASGR1, GHR, RABGEF1, SNX2, RINL, SNX9, RAC1, SNX5, AP2M1, SH3GL1, TNK2, CAV1, CSNK1D, NME1, MYO1E, CLCN5, RABEP1, STEAP2, CSNK1G2	1908	181	18082
GOTERM_BP_DIRECT	GO:0006641~triglyceride metabolic process	9	0.386266	0.0477162	GPX1, GK, ACSL1, CAV1, APOC3, PCSK9, ACSL4, PTPN11, APOE	1908	39	18082
GOTERM_BP_DIRECT	GO:0006417~regulation of translation	20	0.858369	0.0499258	DDX6, RBM8A, KLHL25, NCBP2, TSC1, IGF1, EIF2S1, MIF4GD, ELAVL1, PUM2, RBM3, CPEB1, RPS6KB1, CNOT1, MKNK1, AKT1, LSM14A, EIF4G2, EIF2A, NCK1	1908	121	18082

## Sheet: Sheet 5
Category	Term	Count	%	PValue	Genes	List Total	Pop Hits	Pop Total
GOTERM_BP_DIRECT	GO:0002376~immune system process	48	3.03413	0.000158387	IFITM1, CSF1, ADAR, IL27, AHR, IFIT1, C8B, IFIT3, LGALS3, C9, DHX58, JAK2, CD300LG, OASL1, ATG5, MAP3K5, CHID1, LYN, GSDMD, AKIRIN2, H60B, C1RA, APOBEC3, CR2, JAGN1, CADM1, RSAD2, PRKCB, PRKCE, ERAP1, IRGM1, EIF2AK2, CNPY3, PSMB9, ISG20, MAVS, NLRP10, IRF3, TRAF3, CR1L, OAS3, IRF1, TLR7, IDO2, SERINC3, TLR4, TLR3, LGR4	1280	383	18082
GOTERM_BP_DIRECT	GO:0009615~response to virus	17	1.07459	0.000233245	IFITM1, TGTP1, RSAD2, EIF2AK2, ADAR, IFIT1, IFIT3, ISG20, ACTA2, CXCL10, HNRNPUL1, OAS3, BCL3, DHX58, IFNK, OASL1, TLR3	1280	84	18082
GOTERM_BP_DIRECT	GO:0060395~SMAD protein signal transduction	16	1.01138	0.00028029	GDF10, BMP10, JUN, TGFB1, MIR25, GDF2, SMAD9, BTBD11, GATA4, INHBA, BMP7, INHBC, INHBE, BMP4, NCEH1, SUB1	1280	77	18082
GOTERM_BP_DIRECT	GO:0051607~defense response to virus	26	1.64349	0.000292442	BECN1, IFITM1, IFNA2, ADAR, IFIT1, IFIT3, DHX58, OASL1, BNIP3L, APOBEC3, RSAD2, STAT2, EIF2AK2, ISG15, IFIT1BL2, ISG20, CXCL10, MAVS, IRF3, OAS3, IRF1, IFNK, IFIT3B, TLR7, SERINC3, TLR3	1280	167	18082
GOTERM_BP_DIRECT	GO:0035458~cellular response to interferon-beta	11	0.695322	0.000448211	PNPT1, TGTP1, STAT1, IRF1, IFI203, IGTP, IRGM1, IFIT1, TLR3, IFIT3, GM12185	1280	41	18082
GOTERM_BP_DIRECT	GO:0006260~DNA replication	19	1.20101	0.00252663	RRM1, MCM7, RFC2, RMI1, MCMDC2, PRIM1, GINS3, NOL8, ORC5, ING5, PEO1, DBF4, RBBP4, ORC3, ORC2, GMNC, POLH, MCM2, POLG	1280	123	18082
GOTERM_BP_DIRECT	GO:0043408~regulation of MAPK cascade	12	0.758534	0.00255018	GDF10, NTRK2, BMP10, PHLPP1, TGFB1, PSAP, GDF2, NF1, INHBA, BMP7, INHBC, INHBE	1280	59	18082
GOTERM_BP_DIRECT	GO:0071360~cellular response to exogenous dsRNA	6	0.379267	0.00289632	RAET1C, MAVS, IFIT1, TLR3, RAET1B, RAET1A	1280	15	18082
GOTERM_BP_DIRECT	GO:0000165~MAPK cascade	13	0.821745	0.00305053	MEF2A, MAP2K1, TGFB1, ADRA2B, ZFP36L2, ZFP36L1, ZFP36, DOK4, PABPN1, MYC, NF1, FGF13, MAP3K5	1280	69	18082
GOTERM_BP_DIRECT	GO:0045597~positive regulation of cell differentiation	10	0.632111	0.00438098	GLP1R, BMP4, MAP2K1, JUN, SMAD9, PA2G4, JAK2, BMP7, SMARCA4, CTGF	1280	46	18082
GOTERM_BP_DIRECT	GO:0010862~positive regulation of pathway-restricted SMAD protein phosphorylation	10	0.632111	0.00587522	GDF10, BMP4, BMP10, TGFB1, GDF2, INHBA, BMP7, INHBC, ACVR2A, INHBE	1280	48	18082
GOTERM_BP_DIRECT	GO:0007035~vacuolar acidification	5	0.316056	0.0106234	ATP6V0B, ATP6V1H, ATP6V0D1, ATP6V0C, ATP6V0D2	1280	13	18082
GOTERM_BP_DIRECT	GO:0000082~G1/S transition of mitotic cell cycle	11	0.695322	0.0111751	ITGB1, CCND2, CCNE2, PLK2, CDK2, ID4, RBBP8, INHBA, E2F5, CDC25A, CDKN3	1280	62	18082
GOTERM_BP_DIRECT	GO:0008380~RNA splicing	28	1.76991	0.0119505	SF3B4, SFSWAP, CELF1, SRSF1, CASC3, RBM4, SYNCRIP, LGALS3, PPP4R2, CIR1, RBM10, SRSF12, DDX39, HSPA8, GM21704, MBNL2, RBFOX3, SREK1IP1, SCAF1, JMJD6, HNRNPM, PRPF4, HNRNPH1, RBMY, SRSF4, PABPC1, SNRPA, SNRPB	1280	241	18082
GOTERM_BP_DIRECT	GO:0006402~mRNA catabolic process	7	0.442478	0.0121114	ZFP36, ZHX2, PNPT1, AGO4, DXO, ZFP36L2, ZFP36L1	1280	28	18082
GOTERM_BP_DIRECT	GO:0019882~antigen processing and presentation	10	0.632111	0.0127578	RAET1D, RAET1C, H60B, RAB5B, RAET1E, FCGRT, RAB34, RAET1B, PSMB9, RAET1A	1280	54	18082
GOTERM_BP_DIRECT	GO:0051896~regulation of protein kinase B signaling	5	0.316056	0.014053	INPP4B, NTRK2, SESN3, SESN1, GATA4	1280	14	18082
GOTERM_BP_DIRECT	GO:0001889~liver development	14	0.884956	0.0161398	UPF2, JUN, CADM1, CEBPG, COBL, AHR, PKD1, IGF2R, SMARCA4, HMGCL, RB1CC1, SLCO2B1, NF1, ACADM	1280	95	18082
GOTERM_BP_DIRECT	GO:0045600~positive regulation of fat cell differentiation	9	0.5689	0.0206374	ZFP36, CREB1, WIF1, ID2, HTR2C, PPARG, CREBL2, ZFP36L1, ADIG	1280	49	18082
GOTERM_BP_DIRECT	GO:0009409~response to cold	8	0.505689	0.020766	CXCL10, TMEM135, ACADL, UCP3, ADRB1, PPARG, ADRB2, ACADM	1280	40	18082
GOTERM_BP_DIRECT	GO:0050714~positive regulation of protein secretion	8	0.505689	0.020766	UNC13B, RPH3AL, TGFB1, RAB34, ZFP384, ANG, SYTL4, EXPH5	1280	40	18082
GOTERM_BP_DIRECT	GO:0007034~vacuolar transport	5	0.316056	0.0228234	NDFIP2, NDFIP1, ATP6V0D1, CHMP6, ATP6V0D2	1280	16	18082
GOTERM_BP_DIRECT	GO:0006914~autophagy	18	1.1378	0.0228771	BECN1, RAB7, VCP, GABARAPL1, USP10, PHF23, IRGM1, PIK3CB, ATG14, 5330417C22RIK, FOXO1, LAMP1, RB1CC1, PLEKHM1, TMBIM6, PIK3C3, ATG4D, ATG5	1280	142	18082
GOTERM_BP_DIRECT	GO:0006270~DNA replication initiation	6	0.379267	0.0241326	ORC5, CCNE2, MCM7, ORC3, GMNC, MCM2	1280	24	18082
GOTERM_BP_DIRECT	GO:0006511~ubiquitin-dependent protein catabolic process	19	1.20101	0.0243844	USP47, VCP, CUL5, USP31, USP9X, USP10, AMFR, CUL2, UBE2D3, UBE4A, UBR3, RNF6, UBE4B, NUB1, PSMA4, RNF213, NPLOC4, PSMC2, TTC3	1280	154	18082
GOTERM_BP_DIRECT	GO:0006865~amino acid transport	8	0.505689	0.0266038	SLC6A9, SLC6A15, MYC, SLC43A1, SLC3A1, SLC6A20A, SLC38A9, SLC38A8	1280	42	18082
GOTERM_BP_DIRECT	GO:0002224~toll-like receptor signaling pathway	5	0.316056	0.028215	TRAF3, MAPKAPK2, TLR7, TLR4, TLR3	1280	17	18082
GOTERM_BP_DIRECT	GO:0016310~phosphorylation	57	3.60303	0.0289877	ALK, ADPGK, PIK3C2G, PIK3CB, MYLK, MYLK4, PPIP5K2, PIM3, PIP4K2B, SEPHS1, JAK2, PRKACB, MAP3K5, CSNK1G3, MAP2K1, SPHK2, PRKCB, PRKCE, CSNK2A2, NME2, PRKCA, MAPKAPK2, CMPK2, SIK1, PIK3C3, TNIK, SGK1, TSSK1, RBKS, ROCK2, PRKX, AK8, PAPSS1, DGUOK, MAPK8, STK33, MAP2K7, PAK3, MARK3, MAP4K3, IP6K2, LYN, NTRK2, CDK18, RYK, TPK1, PLK2, EIF2AK1, EIF2AK2, CDC42BPA, CLK4, ACVR2A, MAP3K15, CDK2, PI4KA, MAP3…	1280	612	18082
GOTERM_BP_DIRECT	GO:0098792~xenophagy	14	0.884956	0.0295615	FANCL, STAT2, HILPDA, SLC35C1, MRPS2, MYLK, ALKBH5, 1810022K09RIK, TMEM39A, TNIK, HIST1H3I, LGALS8, LMCD1, SNRPB	1280	103	18082
GOTERM_BP_DIRECT	GO:0001525~angiogenesis	26	1.64349	0.03212	BECN1, RAMP2, ROBO4, SETD2, UBP1, PRKX, CTGF, EFNB2, FGF6, RNF213, SRPX2, CYP1B1, CCBE1, JUN, GDF2, FZD8, PRKCA, ADRA2B, FMNL3, BMP4, MEIS1, PTPRB, ANGPTL3, ANG, ITGB1BP1, PNPLA6	1280	239	18082
GOTERM_BP_DIRECT	GO:0045662~negative regulation of myoblast differentiation	6	0.379267	0.0332475	BMP4, CXCL10, CSRP3, TGFB1, ID3, PPARD	1280	26	18082
GOTERM_BP_DIRECT	GO:0006635~fatty acid beta-oxidation	8	0.505689	0.0334683	HADHB, ABCD3, ACAA2, ACADM, HADH, SLC27A2, DECR1, PPARD	1280	44	18082
GOTERM_BP_DIRECT	GO:0006950~response to stress	7	0.442478	0.0343203	ALK, GLP1R, TRAP1, EIF2AK1, MAPKAPK2, AHR, MAP2K7	1280	35	18082
GOTERM_BP_DIRECT	GO:0061025~membrane fusion	7	0.442478	0.0343203	NAPA, STX12, BLOC1S6, HACE1, STX18, STX4A, DNM2	1280	35	18082
GOTERM_BP_DIRECT	GO:0016567~protein ubiquitination	36	2.2756	0.0375401	VCP, CUL5, RNF13, MYCBP2, UBE2D3, DCAF8, KLHL35, TAZ, ASB17, DCAF5, KBTBD13, NUB1, HECTD1, RNF213, OS9, CCIN, SOCS7, FBXO9, DNAH12, HACE1, FANCL, UBE4A, NOSIP, UBE4B, LRRC41, SPSB3, KLHL9, ZC3HC1, RNF128, NEURL2, TRAF3, MED21, ASB6, FBXL3, BIRC6, DZIP3	1280	362	18082
GOTERM_BP_DIRECT	GO:0071364~cellular response to epidermal growth factor stimulus	7	0.442478	0.0388092	BECN1, ERRFI1, ZFP36, MCM7, MYC, ZFP36L2, ZFP36L1	1280	36	18082
GOTERM_BP_DIRECT	GO:0033189~response to vitamin A	5	0.316056	0.0410864	DNMT3A, PPARG, GATA4, SFTPA1, PPARD	1280	19	18082
GOTERM_BP_DIRECT	GO:0042325~regulation of phosphorylation	5	0.316056	0.0410864	SRPX2, MCM7, PHACTR1, PIK3R2, BMP7	1280	19	18082
GOTERM_BP_DIRECT	GO:0032869~cellular response to insulin stimulus	12	0.758534	0.0456947	KAT2B, ERRFI1, GOT1, STAT1, IRS1, MYC, CDK2, PIK3R2, PPARG, SGK1, FOXO1, ZFP36L1	1280	88	18082
GOTERM_BP_DIRECT	GO:0009411~response to UV	8	0.505689	0.0458169	ZRANB3, MAPK8, CIRBP, UBE4B, MAP2K7, TROVE2, MAP4K3, RAD18	1280	47	18082
GOTERM_BP_DIRECT	GO:0032722~positive regulation of chemokine production	5	0.316056	0.0485766	EIF2AK2, IL6RA, TLR7, TLR4, TLR3	1280	20	18082
GOTERM_BP_DIRECT	GO:0002230~positive regulation of defense response to virus by host	15	0.948167	0.0494471	FANCL, STAT2, HILPDA, SLC35C1, MRPS2, IL27, MYLK, ALKBH5, MAVS, 1810022K09RIK, TMEM39A, TNIK, HIST1H3I, LMCD1, SNRPB	1280	122	18082

## Sheet: Sheet 6
Category	Term	Count	%	PValue	Genes	List Total	Pop Hits	Pop Total
GOTERM_BP_DIRECT	GO:0007623~circadian rhythm	24	2.29226	3.29577e-09	NGFR, SREBF1, DDC, CPT1A, DHX9, RORC, NR1D1, NPAS2, ARNTL, PER2, PER1, PER3, DBP, UBB, NFIL3, MAT2A, THRAP3, NOCT, NAMPT, KLF9, CRY2, CRY1, PPARA, CLOCK	912	108	18082
GOTERM_BP_DIRECT	GO:0006629~lipid metabolic process	54	5.15759	1.52314e-08	ACSM3, GDE1, CROT, FADS2, CYP4V3, LIPG, ENPP2, SREBF1, ELOVL1, CPT1A, PCYT1A, ELOVL5, ACOT12, GPCPD1, PLA2G15, CYP39A1, PLA2G16, SULT1D1, NPC1, SOAT2, ASPG, PPARA, PLPP1, HACD1, SGMS1, INSIG2, HSD17B4, LPL, HACD3, ADIPOR1, HSD17B11, AGPAT2, CYP7A1, 4932438A13RIK, MTM1, PTDSS1, GPAT4, HSD17B2, SCAP, HACL1, CEPT1, PCK1, LDLR, SLC16A1, CHKA, EPT1, DDHD2, DHCR24, CES1D, ETNK2, THRSP, CHPT1, LPIN2, PN…	912	459	18082
GOTERM_BP_DIRECT	GO:0048511~rhythmic process	25	2.38777	2.14669e-08	DHX9, CIPC, RORC, NPAS2, ARNTL, CIART, DBP, NFIL3, NOCT, NAMPT, NGFR, CBX3, USP2, NR1D2, NR1D1, PER1, PER3, TEF, THRAP3, KLF9, CRY2, CRY1, TOP1, PPARA, CLOCK	912	128	18082
GOTERM_BP_DIRECT	GO:0032922~circadian regulation of gene expression	17	1.62369	3.61715e-08	NGFR, USP2, RORC, NR1D1, NPAS2, ARNTL, CIART, PER2, PER1, PER3, NOCT, NAMPT, CRY2, CRY1, TOP1, PPARA, CLOCK	912	61	18082
GOTERM_BP_DIRECT	GO:0042632~cholesterol homeostasis	13	1.24164	6.15671e-05	ABCG8, ABCG5, PLA2G12B, LRP5, MIA2, LPL, TMEM97, CYP7A1, NPC1, SOAT2, LIPG, SLC37A4, LDLR	912	63	18082
GOTERM_BP_DIRECT	GO:0031100~organ regeneration	12	1.14613	9.25116e-05	TGFBR3, PFKFB1, CDKN1A, CXCL12, NR4A3, CCND1, PPAT, FPGS, PHB, LCP1, NR0B2, TGFBR2	912	56	18082
GOTERM_BP_DIRECT	GO:0031397~negative regulation of protein ubiquitination	9	0.859599	0.000872625	PER2, GCLC, UBXN1, USP4, PRMT3, CRY1, RPS3, GTPBP4, MTOR	912	41	18082
GOTERM_BP_DIRECT	GO:0031639~plasminogen activation	5	0.477555	0.00105271	FGA, FGG, F11, DHCR24, KLKB1	912	10	18082
GOTERM_BP_DIRECT	GO:0016310~phosphorylation	49	4.68004	0.00162097	DYRK2, ZAK, ARAF, KHK, NMRK1, STK16, PIP4K2C, TK1, CAMK1D, DAPK1, RIPK2, DYRK1B, BAZ1B, TGFBR2, LATS1, PRKD3, NME7, SIK3, BMP2K, FAM20C, ULK1, MET, GNE, PFKFB1, DTYMK, PDXK, SGMS1, AK2, AK4, ERBB3, ERBB4, MKNK2, TRPM7, MAP2K6, PLK3, CDK19, CHKA, RIOK3, GLYCTK, MERTK, MAPK14, MTOR, SNRK, UCK2, WEE1, UCK1, ETNK2, TAOK2, FGFR2	912	612	18082
GOTERM_BP_DIRECT	GO:0050796~regulation of insulin secretion	9	0.859599	0.00220009	PER2, SREBF1, CPT1A, SLC16A1, INS2, PDE3B, CLOCK, SLC8B1, ARNTL	912	47	18082
GOTERM_BP_DIRECT	GO:0006970~response to osmotic stress	6	0.573066	0.00332472	APOBEC1, PLK3, TSC22D3, TSC22D2, SORD, FMO1	912	21	18082
GOTERM_BP_DIRECT	GO:0008152~metabolic process	38	3.62942	0.00388158	PFKFB1, ALAS1, H6PD, ACSS2, ACY1, ACSM3, ECI2, GNS, AGPAT2, FTCD, TYMP, GYS2, UGP2, MAN2A1, GPAT4, AFMID, DBT, ENPP2, UGT2A3, ENPP1, GUSB, UGT2B34, CAMK1D, GCH1, UGT2B35, BCKDHB, NAGA, HOGA1, UGDH, UCK2, UCK1, BDH1, PAH, ALPL, ACO1, CIAPIN1, PNPLA2, GNE	912	463	18082
GOTERM_BP_DIRECT	GO:0043401~steroid hormone mediated signaling pathway	9	0.859599	0.00475633	RXRA, NR4A3, THRA, NR1I3, RORC, NR1D2, NR1D1, PPARA, NR0B2	912	53	18082
GOTERM_BP_DIRECT	GO:0008203~cholesterol metabolic process	12	1.14613	0.00502644	SREBF1, NPC1, FECH, SOAT2, INSIG2, CAT, LRP5, SCAP, DHCR24, CLN8, CYP7A1, LDLR	912	89	18082
GOTERM_BP_DIRECT	GO:0042254~ribosome biogenesis	12	1.14613	0.00502644	RCL1, NOP56, EBNA1BP2, NOP58, NOA1, RPL34, MRPL36, RPL34-PS1, WDR12, GTPBP4, BYSL, GNL3	912	89	18082
GOTERM_BP_DIRECT	GO:0006457~protein folding	15	1.43266	0.00514939	MESDC2, FKBP11, CCT2, HSP90AA1, HSPA4L, HSPE1, CLPX, HSPD1, CCT6A, DNAJB6, DNAJB4, GRPEL2, CALR, PPID, FKBP5	912	128	18082
GOTERM_BP_DIRECT	GO:0050821~protein stabilization	15	1.43266	0.00514939	NCKAP1, CCT2, MTRR, STXBP4, USP2, PHB, PIK3R1, ATP1B1, GTPBP4, SAV1, HSPD1, CCT6A, PER3, BAG3, CALR	912	128	18082
GOTERM_BP_DIRECT	GO:0006520~cellular amino acid metabolic process	6	0.573066	0.00612776	DDC, ACY1, GSS, TAT, ASPG, ASL	912	24	18082
GOTERM_BP_DIRECT	GO:0055114~oxidation-reduction process	50	4.77555	0.00675099	VKORC1L1, MTRR, JMJD1C, SDR9C7, ALKBH7, CHCHD4, FADS2, SH3PXD2A, AIFM2, OGFOD1, CYP4V3, BCKDHB, SORD, CYP39A1, UGDH, POR, BDH1, ETHE1, AKR1C14, G6PDX, CAT, KDM7A, PCYOX1, H6PD, HSD17B4, HSD17B11, CYP7A1, DDO, MTHFD1L, HSD17B2, PRODH, HSD3B7, NDUFA3, FMO1, BBOX1, MICAL2, DHCR24, FMO2, SUOX, FMO5, CYP8B1, DHRS3, DHRS4, P4HA1, DHRS9, PAH, IMPDH2, PIR, CDO1, UOX	912	676	18082
GOTERM_BP_DIRECT	GO:0002931~response to ischemia	7	0.668577	0.00857157	PER2, RCAN1, EGR1, EIF4EBP1, EEF2, HSPD1, MAP2K6	912	36	18082
GOTERM_BP_DIRECT	GO:0014902~myotube differentiation	5	0.477555	0.00899807	HACD1, SORT1, INS2, AVPR1A, MET	912	17	18082
GOTERM_BP_DIRECT	GO:0008202~steroid metabolic process	11	1.05062	0.00946399	CYP39A1, SREBF1, NPC1, SOAT2, INSIG2, SCAP, DHCR24, SLC37A4, CYP7A1, LDLR, DHRS4	912	84	18082
GOTERM_BP_DIRECT	GO:0006351~transcription, DNA-templated	118	11.2703	0.00960073	NAB1, GTF2B, JADE1, RORC, JMJD1C, RRP8, PNN, CCND1, KHSRP, TRIM24, EPC2, SOX9, SOX6, TLE1, RUNX3, PIAS2, ILF3, CIRH1A, DEPDC1A, RFX4, XRN2, ERF, TRIB3, ATF6, CLOCK, ANP32A, EPAS1, FLII, NPAS2, HELZ2, ZBED6, MAP2K6, BPTF, BANP, STAT5A, SMAD2, EGR1, STAT5B, RBPMS, CBX3, SETD1B, RFXANK, NR1D2, NR1D1, POU2F2, SMARCA2, NR0B2, MLXIPL, MAFB, CNOT7, SON, NR4A3, PIR, HBP1, RERE, AHCTF1, THRA, CITED2, AKAP…	912	1885	18082
GOTERM_BP_DIRECT	GO:0070936~protein K48-linked ubiquitination	8	0.764088	0.00974995	UBE2H, ITCH, PELI1, ARIH2, NEDD4L, RFFL, RNF5, RNF187	912	48	18082
GOTERM_BP_DIRECT	GO:0006810~transport	114	10.8883	0.0111595	SLC23A2, SLC35B4, PGAP1, SLC35B1, AQP9, SLC4A4, PEX26, IPO5, CHCHD4, FADS2, KHSRP, SLC16A7, SLC16A2, SLC25A44, MFSD2A, AGFG1, SLC34A2, ABCG8, ABCG5, CPT1A, STARD5, MMGT1, ATP11C, PDZK1, ATP1B1, SCAMP1, THOC7, TOM1L2, DDX39B, ZC3H11A, SLC9A8, VDAC1, PPID, TSG101, SLC26A1, SLC45A3, ABCB4, SLC1A2, ITPR1, PIK3R1, SLC1A5, SLC30A10, GABARAP, MTM1, ORC4, TTPA, SEC14L4, TRPM7, SLC38A3, ATP6V1D, SLC38A2, …	912	1822	18082
GOTERM_BP_DIRECT	GO:0000082~G1/S transition of mitotic cell cycle	9	0.859599	0.0122177	LATS1, PLK3, CDKN1A, CCND1, CCNE1, PPAT, EIF4EBP1, SKP2, HINFP	912	62	18082
GOTERM_BP_DIRECT	GO:0005977~glycogen metabolic process	7	0.668577	0.0126408	GYS2, UGP2, PPP1R3C, PPP1R3B, STBD1, SLC37A4, PHKA2	912	39	18082
GOTERM_BP_DIRECT	GO:0046686~response to cadmium ion	6	0.573066	0.0139153	GCLC, DTYMK, NPC1, GSS, CAT, SORD	912	29	18082
GOTERM_BP_DIRECT	GO:0016567~protein ubiquitination	29	2.76982	0.0165086	RNF38, TULP4, RNF19B, NEDD4L, KLHL33, CBLB, DTX4, FBXO21, RNF5, DCAF7, DCAF6, TMEM189, ZNRF3, TRIM24, ARIH2, TCEB2, BRAP, KCMF1, SMURF1, KLHL24, UBAC1, MIB1, RNF144A, RNF145, ITCH, RNF125, MED24, UBE2U, RNF220	912	362	18082
GOTERM_BP_DIRECT	GO:0042593~glucose homeostasis	14	1.33715	0.016775	NGFR, MBD5, SLC16A1, INS2, PDE3B, NUCKS1, ADIPOR1, SLC8B1, MLXIPL, CRY2, CRY1, PCK1, SLC37A4, MET	912	133	18082
GOTERM_BP_DIRECT	GO:0030279~negative regulation of ossification	5	0.477555	0.0192919	SMURF1, P2RY2, LRP4, ENPP1, SOX9	912	21	18082
GOTERM_BP_DIRECT	GO:0042060~wound healing	11	1.05062	0.0198364	EPB41L4B, SDC4, MUSTN1, INS2, FGFR1OP2, FN1, MIA3, PPARA, CELSR1, MTOR, TGFBR2	912	94	18082
GOTERM_BP_DIRECT	GO:0046326~positive regulation of glucose import	6	0.573066	0.0235873	ERBB3, ERBB4, INS2, SLC1A2, SORBS1, MAPK14	912	33	18082
GOTERM_BP_DIRECT	GO:0006511~ubiquitin-dependent protein catabolic process	15	1.43266	0.0237045	PSMD11, USP4, USP22, USP2, UBR2, HERPUD1, ITCH, ZNRF3, PSMA1, PSMD3, ARIH2, SKP2, RFFL, SQSTM1, BAP1	912	154	18082
GOTERM_BP_DIRECT	GO:0007265~Ras protein signal transduction	7	0.668577	0.0296914	BRAP, RIT1, CDKN1A, ULK1, DHCR24, RFXANK, HRAS	912	47	18082
GOTERM_BP_DIRECT	GO:0009880~embryonic pattern specification	5	0.477555	0.0304162	SMAD2, PGAP1, ERBB4, FGFR2, LRP6	912	24	18082
GOTERM_BP_DIRECT	GO:0032869~cellular response to insulin stimulus	10	0.95511	0.0329164	APOBEC1, GCLC, CEACAM1, PPAT, PDE3B, ENPP1, TRIB3, PIK3R1, SORBS1, PCK1	912	88	18082
GOTERM_BP_DIRECT	GO:0043627~response to estrogen	9	0.859599	0.0346244	RCAN1, SLC34A2, DTYMK, HSP90AA1, ABCC2, CCND1, CITED2, TGFBR2, HSPD1	912	75	18082
GOTERM_BP_DIRECT	GO:1902042~negative regulation of extrinsic apoptotic signaling pathway via death domain receptors	5	0.477555	0.0348103	FGA, DAPK1, FGG, PSEN2, RFFL	912	25	18082
GOTERM_BP_DIRECT	GO:0006749~glutathione metabolic process	7	0.668577	0.0355607	GSTM4, GCLC, GGT6, ETHE1, CTH, G6PDX, GSTT1	912	49	18082
GOTERM_BP_DIRECT	GO:0006397~mRNA processing	25	2.38777	0.0366767	RBM28, RBM25, DDX46, GEMIN2, AKAP8L, ADARB1, USP39, PNN, KHSRP, NOCT, TRA2A, SAP18, APOBEC1, ZRANB2, THOC7, HNRNPL, PRPF18, SON, PHF5A, DDX39B, CSDC2, THRAP3, XRN2, STRAP, HNRNPC	912	322	18082
GOTERM_BP_DIRECT	GO:1903146~regulation of mitophagy	5	0.477555	0.0395526	SREBF1, CTTN, WDR75, VDAC1, DNM1L	912	26	18082
GOTERM_BP_DIRECT	GO:0040014~regulation of multicellular organism growth	6	0.573066	0.0406641	STAT5A, STAT5B, MBD5, GPAT4, G6PDX, FGFR2	912	38	18082
GOTERM_BP_DIRECT	GO:0008637~apoptotic mitochondrial changes	5	0.477555	0.0446443	GCLC, PNP, AIFM2, DNM1L, HSPD1	912	27	18082
GOTERM_BP_DIRECT	GO:0034198~cellular response to amino acid starvation	5	0.477555	0.0446443	SH3GLB1, HNRNPL, CDKN1A, ULK1, SLC38A2	912	27	18082
GOTERM_BP_DIRECT	GO:0006641~triglyceride metabolic process	6	0.573066	0.0447852	APOBEC1, CPT1A, INSIG2, GPAT4, CAT, SLC37A4	912	39	18082
GOTERM_BP_DIRECT	GO:0006814~sodium ion transport	12	1.14613	0.0484585	SLC23A2, SLC34A2, SLC13A2, SLC20A1, SLC9A8, ATP1A1, SLC38A3, ATP1B1, SLC38A2, SLC4A4, SLC8B1, SLC17A3	912	124	18082
