# Supplementary material for: Rewiring of liver diurnal transcriptome rhythms by triiodothyronine (T3) supplementation
Source: eLife. 2022 Jul 27;11:e79405. doi: 10.7554/eLife.79405 (PMC9391036; doi:10.7554/eLife.79405)
Supplement: Supplementary file 6. [file elife-79405-supp6.xlsx]

## Sheet: Summary
Supplementary Table S6. Rhythmic analyses by CircaCompare
Sheet 1 - Complete CircaCompare analyses
Sheet 2 - GSEA of mesor UP genes
Sheet 3 - GSEA of mesor DOWN genes
Sheet 4 - GSEA of amplitude UP genes
Sheet 5 - GSEA of amplitude DOWN genes
Sheet 6 - GSEA of phase advanced genes
Sheet 7 - GSEA of phase delayed genes
Sheet 8 - CircaCompare analyses of averaged and mesor-normalized genes from GSEA

## Sheet: Sheet 1
ID	Gene.Symbol	Presence of rhythmicity (p-value) for CON	Presence of rhythmicity (p-value) for T3	CON mesor estimate	T3 mesor estimate	Mesor difference estimate	P-value for mesor difference	CON amplitude estimate	T3 amplitude estimate	Amplitude difference estimate	P-value for amplitude difference	CON peak time hours	T3 peak time hours	Phase difference estimate	P-value for difference in phase	Shared period estimate	Change for Amplitude	Change for Phase	Change for Mesor
TC0900000835.mm.2	Clpx	6.63743e-14	6.0456e-08	12.4663	11.5641	-0.902123	1.83053e-08	1.77325	1.29681	-0.476445	0.0133296	23.0986	23.9891	0.890447	0.0654942	24	DOWN	NO CHANGE	DOWN
TC1200000279.mm.2	Nampt	1.62566e-13	4.39908e-08	10.2804	11.2205	0.94006	7.07529e-14	1.44634	0.689465	-0.756874	1.42263e-07	13.5127	14.2246	0.71194	0.187717	24	DOWN	NO CHANGE	UP
TC0100001788.mm.2	Slc30a10	1.39163e-12	1.59167e-08	9.08542	8.30206	-0.783353	1.57214e-07	1.23626	1.45411	0.217857	0.226629	22.2432	22.7325	0.489235	0.331678	24	NO CHANGE	NO CHANGE	DOWN
TC0400004074.mm.2	Per3	1.47094e-12	6.155e-10	8.0425	8.83137	0.788869	3.02367e-05	2.30833	1.99061	-0.317717	0.189946	11.7212	12.6559	0.934658	0.0339242	24	NO CHANGE	DELAY	UP
TC0300000864.mm.2	Rorc	2.42804e-12	1.78568e-12	9.88542	9.16079	-0.724623	2.29096e-05	2.11523	2.37535	0.260127	0.23136	17.3716	18.6907	1.31906	0.000862427	24	NO CHANGE	DELAY	DOWN
TC0700001660.mm.2	Arntl	4.01156e-12	2.7511e-10	7.78292	7.80704	0.0241267	0.909724	2.64145	2.75127	0.109818	0.718205	21.953	22.7942	0.841213	0.0515004	24	NO CHANGE	NO CHANGE	NO CHANGE
TC0700000861.mm.2	Dbp	4.70036e-12	1.12121e-13	12.3296	12.4447	0.115119	0.690581	4.66962	3.96565	-0.70397	0.0932803	10.3192	11.3464	1.02722	0.00672456	24	NO CHANGE	DELAY	NO CHANGE
TC0400001856.mm.2	Dhrs3	5.12327e-12	3.72075e-05	13.6508	13.3655	-0.285298	0.00382484	0.770175	0.636486	-0.133689	0.314323	23.4985	1.42488	1.9264	0.0115056	24	NO CHANGE	DELAY	DOWN
TC0700003614.mm.2	Homer2	7.8134e-12	0.000839868	8.00292	8.2129	0.20998	0.0646804	1.14027	0.524286	-0.615981	0.00031232	13.7339	12.9726	-0.761223	0.399102	24	DOWN	NO CHANGE	NO CHANGE
TC1100003688.mm.2	Nr1d1	1.11768e-11	3.66425e-13	8.49167	7.74923	-0.74244	0.00142842	3.38461	2.76967	-0.614935	0.0530121	6.95973	7.91659	0.956857	0.0171769	24	NO CHANGE	DELAY	DOWN
TC0600003600.mm.2	Cml5	2.88478e-11	0.229922	10.3033	7.18893	-3.1144	2.10177e-21	1.75311	0.249667	-1.50344	2.2008e-07	17.2707	21.2893	4.01857	0.128789	24	DOWN	NO CHANGE	DOWN
TC0700003764.mm.2	Thrsp	3.90146e-11	0.00273085	15.9208	18.077	2.15619	1.57158e-13	2.36199	0.721626	-1.64036	8.83873e-07	15.1079	19.4062	4.29836	0.000393233	24	DOWN	DELAY	UP
TC0500001584.mm.2	Por	4.4675e-11	1.59956e-06	13.8158	14.0527	0.236865	0.0848784	1.36678	1.0579	-0.308882	0.113711	12.3697	11.6739	-0.695853	0.259478	24	NO CHANGE	NO CHANGE	NO CHANGE
TC1900001425.mm.2	Slc16a12	9.64609e-11	1.91622e-07	11.5092	12.69	1.18087	1.50275e-19	0.955172	0.483972	-0.471199	4.42005e-05	12.1834	11.4592	-0.724187	0.261135	24	DOWN	NO CHANGE	UP
TC0100002969.mm.2	Insig2	1.16479e-10	6.22636e-06	9.96583	11.8612	1.8954	1.39007e-15	1.78089	0.918719	-0.862173	0.000249224	0.235187	0.503926	0.268739	0.707089	24	DOWN	NO CHANGE	UP
TC1500002052.mm.2	Sco2; Tymp	1.23735e-10	0.00163969	6.48208	5.87387	-0.608214	2.15249e-05	0.993869	0.593659	-0.40021	0.032599	23.4521	23.3119	-0.140169	0.882559	24	DOWN	NO CHANGE	DOWN
TC0700002056.mm.2	Tspan4	1.28278e-10	5.21257e-13	10.4392	10.2012	-0.238016	0.00999041	1.09906	1.28085	0.181792	0.147635	14.7651	15.541	0.775951	0.0633665	24	NO CHANGE	NO CHANGE	DOWN
TC0500002628.mm.2	Clock	1.81109e-10	3.05205e-05	12.9812	12.7526	-0.228631	0.0193883	0.894688	0.591929	-0.302759	0.0294333	22.8197	23.0373	0.217562	0.764077	24	DOWN	NO CHANGE	DOWN
TC0700001624.mm.2	Wee1	2.21424e-10	2.84942e-09	9.45625	9.19546	-0.260794	0.113591	1.91177	1.50679	-0.404977	0.0811994	12.6973	14.2272	1.52982	0.00588407	24	NO CHANGE	DELAY	NO CHANGE
TC1400001499.mm.2	Nr1d2	2.23982e-10	8.34677e-11	9.48667	9.39895	-0.0877183	0.622301	2.12827	2.04863	-0.0796358	0.754344	8.50776	9.7482	1.24043	0.00896542	24	NO CHANGE	DELAY	NO CHANGE
TC0300000272.mm.2	4932438A13Rik	2.53494e-10	0.00122125	11.8117	11.6094	-0.202302	0.0103815	0.701003	0.333017	-0.367985	0.00139567	22.8284	23.5667	0.738314	0.441944	24	DOWN	NO CHANGE	DOWN
TC0300002489.mm.2	Ciart	2.68231e-10	1.24034e-06	6.5075	6.39379	-0.113711	0.736186	3.02668	2.71913	-0.307556	0.522688	11.5753	11.9199	0.344562	0.587068	24	NO CHANGE	NO CHANGE	NO CHANGE
TC1100002314.mm.2	Lgalsl	3.39593e-10	2.31905e-07	9.16125	9.4456	0.284345	0.084643	1.64682	1.34632	-0.300491	0.19847	21.4744	22.9053	1.43086	0.0185761	24	NO CHANGE	DELAY	NO CHANGE
TC0800000991.mm.2	Gpt2	3.62087e-10	0.00271368	13.7025	14.3089	0.606409	2.84045e-08	0.693112	0.378757	-0.314355	0.0165799	13.7532	12.588	-1.16525	0.261048	24	DOWN	NO CHANGE	UP
TC1000001506.mm.2	Avpr1a	6.86261e-10	1.74893e-05	9.60667	8.8928	-0.713869	4.74995e-05	1.40505	1.00721	-0.397842	0.0803642	22.7224	1.09462	2.37225	0.0024828	24	NO CHANGE	DELAY	DOWN
TC0100003401.mm.2	Fmo1	7.0459e-10	0.00504982	16.2879	17.1186	0.830675	1.52474e-17	0.518858	0.205844	-0.313014	0.000409146	16.1964	14.6271	-1.56927	0.192967	24	DOWN	NO CHANGE	UP
TC1700001822.mm.2	Cbs	7.25024e-10	4.86638e-11	13.6492	13.0978	-0.551389	4.90013e-08	0.84387	1.06913	0.225261	0.058758	2.56722	2.84309	0.275872	0.567996	24	NO CHANGE	NO CHANGE	DOWN
TC1000002605.mm.2	Cry1	8.33629e-10	2.48842e-08	7.98333	7.87006	-0.113274	0.348754	1.16845	1.14494	-0.0235122	0.890937	19.445	20.5315	1.08649	0.0564774	24	NO CHANGE	NO CHANGE	NO CHANGE
TC1500002246.mm.2	Smagp	9.043e-10	7.40558e-07	8.57583	9.68298	1.10714	1.50853e-11	1.02183	0.988209	-0.03362	0.843668	1.24787	1.41712	0.169246	0.795161	24	NO CHANGE	NO CHANGE	UP
TC0700004176.mm.2	Gde1	1.17584e-09	1.15e-09	10.8829	9.96355	-0.919365	4.3125e-14	0.917528	0.756709	-0.160819	0.167762	15.2988	15.0914	-0.207393	0.704541	24	NO CHANGE	NO CHANGE	DOWN
TC0700004630.mm.2	Hsd3b7	1.22327e-09	1.04411e-07	12.9804	12.5923	-0.388155	0.00111877	0.94467	1.02166	0.07699	0.623834	1.62002	1.8639	0.243884	0.692378	24	NO CHANGE	NO CHANGE	DOWN
TC0900003040.mm.2	Slc38a3	1.41902e-09	0.00593762	17.135	16.7115	-0.423512	9.82653e-08	0.583668	0.2312	-0.352468	0.000534495	9.17173	9.17085	-0.000875706	0.999399	24	DOWN	NO CHANGE	DOWN
TC1800001237.mm.2	Fgf1	2.01226e-09	3.77674e-06	11.4196	10.6422	-0.777341	3.94984e-07	1.02478	0.941348	-0.0834347	0.646277	16.8249	16.8659	0.0410175	0.954799	24	NO CHANGE	NO CHANGE	DOWN
TC0400002373.mm.2	Pnrc1	2.46801e-09	1.31639e-09	11.9671	12.3095	0.34244	0.00737268	1.32327	1.12434	-0.198936	0.256251	23.0918	23.9634	0.871575	0.113317	24	NO CHANGE	NO CHANGE	UP
TC0100002552.mm.2	Mreg	2.5892e-09	0.00100537	8.41667	8.14214	-0.274524	0.0019853	0.693929	0.357045	-0.336884	0.0059804	21.1671	3.47105	6.30392	2.58521e-07	24	DOWN	DELAY	DOWN
TC1000002453.mm.2	Pdxk	2.79027e-09	3.69165e-07	11.2696	10.9994	-0.270198	0.00269805	0.796696	0.638233	-0.158463	0.187972	15.2031	16.7582	1.55503	0.0230911	24	NO CHANGE	DELAY	DOWN
TC0600003374.mm.2	Gys2	3.12225e-09	3.86957e-07	12.1538	10.1896	-1.96415	7.01278e-19	1.37465	0.770848	-0.603804	0.00142987	12.1088	14.0359	1.92709	0.011086	24	DOWN	DELAY	DOWN
TC0300002605.mm.2	Atp1a1	3.22702e-09	1.24537e-07	14.135	13.9639	-0.171091	0.00634815	0.590802	0.451008	-0.139794	0.10046	13.1628	15.318	2.15523	0.00176657	24	NO CHANGE	DELAY	DOWN
TC0500003314.mm.2	Asl	4.21853e-09	8.36515e-08	14.0379	13.6284	-0.409504	0.00171552	1.13591	1.00563	-0.130282	0.450373	16.7831	17.2109	0.427836	0.498443	24	NO CHANGE	NO CHANGE	DOWN
TC1500001214.mm.2	Tars	4.25647e-09	0.000423237	12.9833	12.4564	-0.526905	1.30152e-06	0.690157	0.478785	-0.211372	0.119238	22.1558	23.1335	0.977717	0.281153	24	NO CHANGE	NO CHANGE	DOWN
TC0400001925.mm.2	Mad2l2	4.26411e-09	0.0298987	7.07333	6.60764	-0.465694	0.000282872	0.75658	0.342279	-0.414301	0.0159905	0.305349	2.0698	1.76445	0.234472	24	DOWN	NO CHANGE	DOWN
TC0700002047.mm.2	Eps8l2	4.37402e-09	0.0148916	9.81167	8.39226	-1.4194	1.27189e-11	1.2603	0.456854	-0.803441	0.000581241	0.881693	1.76799	0.886292	0.525431	24	DOWN	NO CHANGE	DOWN
TC1700002199.mm.2	Ubr2	4.41704e-09	0.000108776	9.96542	10.0791	0.11371	0.151802	0.559327	0.45909	-0.100237	0.370828	12.0313	11.9581	-0.0732347	0.930451	24	NO CHANGE	NO CHANGE	NO CHANGE
TC1900000684.mm.2	Elovl3	5.29378e-09	0.0252744	14.3279	12.1789	-2.14901	6.58504e-08	3.16107	0.750088	-2.41098	4.60176e-06	23.6723	3.51543	3.8431	0.035165	24	DOWN	DELAY	DOWN
TC1500001657.mm.2	Ndrg1	6.08829e-09	0.253726	6.38917	4.72817	-1.66099	6.73432e-13	1.59712	0.179212	-1.41791	2.46885e-07	1.87398	0.28784	-1.58614	0.65096	24	DOWN	NO CHANGE	DOWN
TC0X00003075.mm.2	Tsc22d3	8.38692e-09	6.83329e-06	9.87042	9.90373	0.0333135	0.839479	1.33925	1.06512	-0.274134	0.237249	17.0729	15.3724	-1.70046	0.0309137	24	NO CHANGE	ADVANCE	NO CHANGE
TC1300001779.mm.2	Tubb2a	8.88661e-09	2.06839e-05	9.77542	9.61518	-0.160238	0.548305	2.06599	1.69649	-0.369493	0.333721	23.1431	23.3005	0.157407	0.837915	24	NO CHANGE	NO CHANGE	NO CHANGE
TC1700002314.mm.2	Plin5	9.10523e-09	0.00861306	6.5025	5.96714	-0.535357	0.00149169	0.954001	0.569936	-0.384065	0.0884698	17.8179	16.9776	-0.840245	0.506017	24	NO CHANGE	NO CHANGE	DOWN
TC1400002859.mm.2	Hacl1	9.45293e-09	0.00127169	15.3579	15.0081	-0.349841	0.0135978	0.980282	0.610279	-0.370003	0.0622731	21.3529	23.9077	2.55478	0.0140915	24	NO CHANGE	DELAY	DOWN
TC1900001213.mm.2	Vps13a	1.1395e-08	0.0242184	9.41708	9.1899	-0.227183	0.0274591	0.762321	0.273059	-0.489262	0.00112416	13.6524	14.0683	0.415895	0.783738	24	DOWN	NO CHANGE	DOWN
TC0100002801.mm.2	Per2	1.17328e-08	4.11046e-08	7.47875	7.64181	0.163056	0.428276	1.9125	1.61923	-0.293271	0.30943	13.9942	15.5069	1.51262	0.0227892	24	NO CHANGE	DELAY	NO CHANGE
TC1900001445.mm.2	Ppp1r3c	1.24488e-08	0.00452048	13.6787	6.26161	-7.41714	6.54451e-31	2.1566	0.693221	-1.46338	5.49392e-05	21.2448	23.4033	2.15851	0.10734	24	DOWN	NO CHANGE	DOWN
TC0400002634.mm.2	Acnat1	1.33308e-08	0.00989649	12.1292	14.34	2.21079	1.33419e-20	1.13037	0.363394	-0.766977	0.000113682	21.5257	19.6927	-1.833	0.197733	24	DOWN	NO CHANGE	UP
TC0100000282.mm.2	Npas2	1.5531e-08	1.67123e-08	5.41125	5.19776	-0.213492	0.29856	1.8587	1.76803	-0.0906676	0.754162	23.4622	0.515006	1.05281	0.0883595	24	NO CHANGE	NO CHANGE	NO CHANGE
TC1200001460.mm.2	Lpin1	2.03736e-08	0.00826827	11.1892	12.0965	0.907341	0.0017557	1.9894	0.923578	-1.06582	0.00855879	10.5674	11.8235	1.25609	0.313734	24	DOWN	NO CHANGE	UP
TC0200004943.mm.2	Pxmp4	2.36402e-08	0.892121	12.0388	11.6276	-0.411111	0.0205905	1.02202	0.0290288	-0.99299	0.000169345	22.3755	14.0317	-8.34387	0.718532	24	DOWN	NO CHANGE	DOWN
TC0200002887.mm.2	Proser2	2.56303e-08	0.291497	8.0875	8.4226	0.335099	0.00211064	0.733319	0.13036	-0.602958	0.000174433	20.4831	21.64	1.15687	0.702168	24	DOWN	NO CHANGE	UP
TC0200004229.mm.2	Caprin1	2.62517e-08	0.00520234	15.175	15.4667	0.291746	0.00301017	0.733258	0.318957	-0.414301	0.00319267	22.1166	22.59	0.473488	0.693981	24	DOWN	NO CHANGE	UP
TC0900000497.mm.2	Usp2	2.72132e-08	1.67631e-07	7.65167	7.25645	-0.395218	0.236365	2.72952	2.61417	-0.115347	0.804015	13.1869	14.2411	1.05415	0.123634	24	NO CHANGE	NO CHANGE	NO CHANGE
TC0500001751.mm.2	Bri3	3.29525e-08	0.00757814	9.15292	8.27861	-0.874306	9.2347e-12	0.735989	0.302113	-0.433876	0.00228	9.76388	9.8722	0.108315	0.931851	24	DOWN	NO CHANGE	DOWN
TC0500001464.mm.2	Aacs	3.38398e-08	0.0521266	9.92917	10.9845	1.05532	0.00213514	2.08966	0.789223	-1.30044	0.00635629	14.033	17.772	3.73902	0.0335522	24	DOWN	NO CHANGE	UP
TC0100001180.mm.2	Slc45a3	3.44186e-08	0.000220751	8.02917	8.53407	0.504901	0.0144879	1.76982	0.843641	-0.926182	0.0021586	20.9365	21.9444	1.00795	0.309856	24	DOWN	NO CHANGE	UP
TC1100001276.mm.2	Acaca	3.4523e-08	0.299158	10.895	12.4621	1.5671	1.19602e-08	0.814993	0.329566	-0.485428	0.131382	12.7428	21.0017	8.25882	0.00434175	24	NO CHANGE	NO CHANGE	UP
TC0600000841.mm.2	St3gal5	3.46303e-08	1.6561e-05	12.9267	14.827	1.9003	2.87942e-16	1.00989	0.942082	-0.0678037	0.74181	13.2249	13.3107	0.0857831	0.915682	24	NO CHANGE	NO CHANGE	UP
TC0200003307.mm.2	Fpgs; Mir8093	3.47907e-08	4.53105e-05	11.105	11.5357	0.430734	6.85231e-06	0.676791	0.455973	-0.220818	0.0704169	22.0733	0.0496987	1.97638	0.0237596	24	NO CHANGE	DELAY	UP
TC0500002213.mm.2	Spon2	3.526e-08	0.0243562	6.98458	5.9879	-0.996687	7.52389e-08	1.28051	0.364646	-0.915864	0.000105158	0.845855	3.35133	2.50548	0.150661	24	DOWN	NO CHANGE	DOWN
TC0X00000319.mm.2	Lonrf3	3.65945e-08	1.31607e-05	6.66083	5.93631	-0.724524	7.35818e-06	1.33194	0.694932	-0.637004	0.00293619	18.3399	20.545	2.20509	0.0151387	24	DOWN	DELAY	DOWN
TC1000002338.mm.2	A930033H14Rik	4.10377e-08	4.27696e-06	5.83833	6.07974	0.241409	0.181447	1.17955	1.33982	0.160272	0.531291	11.3806	10.7224	-0.658289	0.390056	24	NO CHANGE	NO CHANGE	NO CHANGE
TC0300001137.mm.2	Sort1	4.14793e-08	8.10383e-09	8.8925	10.6358	1.74327	1.36828e-21	0.795681	0.856167	0.0604856	0.648326	5.26092	5.74268	0.481763	0.440096	24	NO CHANGE	NO CHANGE	UP
TC0100001680.mm.2	Desi2	4.57214e-08	0.0537574	7.55542	5.88065	-1.67476	2.79573e-18	0.669755	0.280112	-0.389642	0.0173632	19.962	18.5786	-1.38335	0.41148	24	DOWN	NO CHANGE	DOWN
TC0700000388.mm.2	Ethe1	4.69096e-08	0.000161428	12.4379	12.0053	-0.432639	0.0055871	0.964388	0.815299	-0.149088	0.480099	23.0954	0.967494	1.87205	0.0458148	24	NO CHANGE	DELAY	DOWN
TC0400001509.mm.2	Ak2	4.78982e-08	1.37112e-05	13.3483	12.5315	-0.816806	1.7948e-10	0.72923	0.59429	-0.13494	0.32707	13.15	14.6557	1.50569	0.0719615	24	NO CHANGE	NO CHANGE	DOWN
TC1200002518.mm.2	Asap2	5.17808e-08	1.96758e-06	6.37625	8.30246	1.92621	1.45898e-16	1.35071	0.78002	-0.570692	0.00780982	23.2229	0.518	1.29511	0.119524	24	DOWN	NO CHANGE	UP
TC1500001585.mm.2	Mtss1	5.25092e-08	9.85248e-06	11.2433	11.1898	-0.0535119	0.697359	1.03713	0.862501	-0.174632	0.371316	12.3519	13.036	0.684077	0.39092	24	NO CHANGE	NO CHANGE	NO CHANGE
TC1700001757.mm.2	Fkbp5	5.86278e-08	9.39055e-06	11.1454	11.0283	-0.117162	0.53701	1.17727	1.33911	0.161848	0.547199	12.6863	12.6917	0.00538531	0.99473	24	NO CHANGE	NO CHANGE	NO CHANGE
TC0500002170.mm.2	Slc5a6	5.95321e-08	0.011737	7.00792	6.55294	-0.45498	0.00142629	0.977143	0.404911	-0.572233	0.00407533	9.95768	13.0511	3.0934	0.0293396	24	DOWN	DELAY	DOWN
TC1700000202.mm.2	Riok2	6.46883e-08	0.0202497	9.68625	9.29222	-0.394028	0.000262189	0.737319	0.263209	-0.47411	0.00137333	13.7943	14.9885	1.19423	0.448304	24	DOWN	NO CHANGE	DOWN
TC0200000868.mm.2	Gpd2	7.38051e-08	0.023141	9.52083	11.8974	2.37661	2.07237e-25	0.613361	0.295142	-0.318219	0.0298082	8.5835	4.37427	-4.20923	0.00724537	24	DOWN	ADVANCE	UP
TC1900001355.mm.2	Gldc	7.46863e-08	0.0154779	11.2167	12.3121	1.09544	6.94188e-10	0.912456	0.428976	-0.48348	0.0178046	22.8251	23.1886	0.363545	0.787329	24	DOWN	NO CHANGE	UP
TC0500001936.mm.2	Crot	7.55869e-08	0.000611736	16.2871	14.9717	-1.31534	9.24369e-09	1.04501	0.904325	-0.140682	0.585989	2.18737	4.59304	2.40567	0.0255542	24	NO CHANGE	DELAY	DOWN
TC0200005317.mm.2	Slmo2	7.88339e-08	0.373527	10.1442	11.8666	1.7224	9.05026e-19	0.591307	0.131101	-0.460206	0.00597826	15.655	21.8949	6.23984	0.0635647	24	DOWN	NO CHANGE	UP
TC0200000393.mm.2	Pnpla7	7.88592e-08	0.0078945	14.3821	14.2513	-0.130754	0.0943569	0.501802	0.258175	-0.243626	0.0281188	3.07435	2.63079	-0.443562	0.733969	24	DOWN	NO CHANGE	NO CHANGE
TC0400000496.mm.2	Stra6l	8.3133e-08	2.53289e-09	13.4217	13.654	0.232302	0.0221845	0.873738	0.845476	-0.0282619	0.839373	0.707145	0.569618	-0.137527	0.823566	24	NO CHANGE	NO CHANGE	UP
TC0400002633.mm.2	Acnat2	8.43906e-08	0.0400774	10.2667	12.6991	2.43244	7.94427e-21	0.947154	0.343788	-0.603366	0.00355731	21.134	19.8234	-1.31066	0.424011	24	DOWN	NO CHANGE	UP
TC0100003662.mm.2	Adck3	9.28092e-08	1.58081e-05	15.2912	14.0347	-1.25651	1.56414e-07	1.26858	1.33275	0.0641681	0.821358	23.1358	0.538686	1.40292	0.0966207	24	NO CHANGE	NO CHANGE	DOWN
TC1200000839.mm.2	Mfsd7c	9.32269e-08	0.793745	5.79667	4.44673	-1.34994	6.84925e-13	0.884856	0.0396634	-0.845192	4.63839e-05	5.40569	18.568	-10.8377	0.405471	24	DOWN	NO CHANGE	DOWN
TC0900000509.mm.2	Slc37a4	1.0162e-07	6.46613e-06	14.5008	14.4729	-0.0279762	0.839127	1.07778	0.811829	-0.265953	0.172242	14.2944	16.3568	2.06233	0.0160175	24	NO CHANGE	DELAY	NO CHANGE
TC0100001381.mm.2	Rgs16	1.03731e-07	2.58955e-05	7.24917	6.68833	-0.560833	0.26062	3.69445	2.8539	-0.840541	0.238387	9.421	9.11902	-0.301984	0.715584	24	NO CHANGE	NO CHANGE	NO CHANGE
TC1500001088.mm.2	Tns2	1.04847e-07	5.26248e-07	9.33375	8.65633	-0.677421	6.45777e-07	1.09057	0.608134	-0.482433	0.00550034	7.02328	8.92983	1.90655	0.0253365	24	DOWN	DELAY	DOWN
TC0X00002993.mm.2	Timm8a1	1.25185e-07	0.00529006	9.49292	9.44669	-0.0462302	0.553567	0.539607	0.263808	-0.275799	0.0151234	13.5237	14.0946	0.570913	0.6551	24	DOWN	NO CHANGE	NO CHANGE
TC1200000142.mm.2	Odc1	1.26625e-07	2.54011e-06	10.6575	9.9347	-0.722798	7.47404e-07	0.928251	0.818416	-0.109836	0.530173	17.2589	17.0306	-0.228236	0.771505	24	NO CHANGE	NO CHANGE	DOWN
TC0200003195.mm.2	Agpat2	1.34544e-07	6.28411e-07	16.15	16.5886	0.438611	1.95481e-05	0.706153	0.659763	-0.0463904	0.72246	19.1616	20.811	1.64936	0.0258522	24	NO CHANGE	DELAY	UP
TC0400000341.mm.2	Aco1	1.51746e-07	0.000212754	14.3575	14.0065	-0.351012	5.10203e-06	0.41482	0.351511	-0.0633092	0.50501	17.0053	18.0437	1.03842	0.286403	24	NO CHANGE	NO CHANGE	DOWN
TC0300000354.mm.2	Noct	1.62962e-07	6.29873e-08	6.2875	7.21913	0.931627	0.000407127	1.9516	1.85968	-0.0919284	0.787952	14.1074	14.4366	0.329249	0.637112	24	NO CHANGE	NO CHANGE	UP
TC0700003793.mm.2	Dgat2	1.66053e-07	0.236956	14.325	14.8526	0.527579	6.06476e-08	0.509698	0.11475	-0.394949	0.00127706	12.4664	8.97889	-3.48752	0.204362	24	DOWN	NO CHANGE	UP
TC0600002620.mm.2	Nat8	1.66491e-07	0.717111	7.0725	5.5152	-1.5573	1.04028e-15	0.877778	0.0496475	-0.828131	3.00122e-05	17.4644	22.2222	4.75787	0.615384	24	DOWN	NO CHANGE	DOWN
TC1500000731.mm.2	Tef	1.8963e-07	1.60359e-09	4.81875	4.25766	-0.561091	2.36156e-05	1.03186	0.985494	-0.0463637	0.783468	10.9199	11.7501	0.830255	0.192387	24	NO CHANGE	NO CHANGE	DOWN
TC0100002121.mm.2	Ptp4a1; Gm13363	1.97027e-07	1.01678e-06	15.3646	15.1637	-0.200873	0.00962992	0.594652	0.470308	-0.124344	0.239637	13.2535	13.6178	0.364275	0.639251	24	NO CHANGE	NO CHANGE	DOWN
TC1600001419.mm.2	Cldn1	2.0816e-07	7.82813e-07	11.9067	12.2116	0.30498	0.0604754	1.36483	0.908819	-0.456015	0.0486753	23.5664	0.233143	0.666701	0.407279	24	DOWN	NO CHANGE	NO CHANGE
TC0900000863.mm.2	Fam96a	2.08174e-07	0.160145	10.66	11.0289	0.368869	0.000171515	0.550533	0.151676	-0.398856	0.00293486	19.8207	18.8855	-0.935223	0.693542	24	DOWN	NO CHANGE	UP
TC0X00001502.mm.2	Pfkfb1	2.37612e-07	0.00346431	12.1054	12.4751	0.369643	0.00179527	0.747859	0.398078	-0.349781	0.0302047	17.0275	18.195	1.1675	0.344099	24	DOWN	NO CHANGE	UP
TC1100000576.mm.2	Sar1b	2.46586e-07	0.041606	15.3987	15.5343	0.135595	0.0294929	0.361875	0.153338	-0.208538	0.0183201	17.465	13.2844	-4.18059	0.0148717	24	DOWN	ADVANCE	UP
TC0600003428.mm.2	Bhlhe41	2.69288e-07	0.322686	5.76292	4.36698	-1.39593	6.61044e-11	1.41016	0.119533	-1.29063	1.14026e-06	9.49615	7.22562	-2.27052	0.662762	24	DOWN	NO CHANGE	DOWN
TC0800000424.mm.2	Ppp1r3b	2.77082e-07	0.00201361	12.3892	13.0024	0.613214	0.0271147	2.10012	0.886872	-1.21325	0.00267686	17.8424	19.5082	1.66577	0.191581	24	DOWN	NO CHANGE	UP
TC0400001510.mm.2	Rnf19b	2.99576e-07	0.000714022	8.77	8.91847	0.148472	0.129908	0.607372	0.444391	-0.162981	0.242047	7.85584	9.21918	1.36333	0.185528	24	NO CHANGE	NO CHANGE	NO CHANGE
TC1800001139.mm.2	Nrep	3.14278e-07	0.0110935	8.18125	7.77071	-0.410536	0.0428976	1.26279	0.601898	-0.660891	0.0206816	12.5132	15.9773	3.46409	0.018884	24	DOWN	DELAY	DOWN
TC1600001304.mm.2	Prodh	3.15926e-07	0.0236956	12.6725	13.4586	0.786071	1.36369e-05	0.679597	0.522113	-0.157484	0.492466	16.3377	21.0831	4.74542	0.00221561	24	NO CHANGE	DELAY	UP
TC0500002699.mm.2	Sult1d1	3.17279e-07	0.000117567	12.8525	15.1406	2.2881	1.26676e-26	0.752324	0.352206	-0.400118	0.00303459	16.6999	14.4821	-2.21785	0.0516262	24	DOWN	NO CHANGE	UP
TC1700000836.mm.2	Cyp39a1	3.18698e-07	2.80435e-05	12.3054	15.3485	3.04306	3.08598e-32	0.680993	0.417157	-0.263836	0.0351305	17.1386	16.5963	-0.54227	0.570983	24	DOWN	NO CHANGE	UP
TC0300000322.mm.2	Jade1	3.21451e-07	3.91767e-05	7.95542	7.16716	-0.788254	1.4663e-07	0.792394	0.748884	-0.0435104	0.807766	7.36846	8.68979	1.32133	0.134793	24	NO CHANGE	NO CHANGE	DOWN
TC0500003297.mm.2	Stx2	3.22358e-07	0.00113219	9.10208	8.68099	-0.421091	2.30702e-05	0.465388	0.404972	-0.0604165	0.6269	18.7753	16.6906	-2.08477	0.0693773	24	NO CHANGE	NO CHANGE	DOWN
TC1100000032.mm.2	Sec14l4	3.2339e-07	8.78203e-06	13.5262	13.7777	0.251409	0.000200468	0.352557	0.425449	0.0728924	0.402217	17.3796	16.6874	-0.692182	0.431932	24	NO CHANGE	NO CHANGE	UP
TC0800000790.mm.2	Mrpl34	3.28579e-07	0.00213382	10.1163	10.0097	-0.106587	0.269435	0.600671	0.384076	-0.216595	0.117403	18.7623	19.9925	1.23022	0.278494	24	NO CHANGE	NO CHANGE	NO CHANGE
TC0200003698.mm.2	Abcb11	3.31727e-07	2.07013e-05	14.0942	15.01	0.915873	4.85548e-13	0.659322	0.466283	-0.193038	0.125785	0.338391	2.99805	2.65966	0.00518111	24	NO CHANGE	DELAY	UP
TC0700004076.mm.2	St5	3.36296e-07	0.00119198	7.84	7.92657	0.0865675	0.630192	1.31701	0.671202	-0.645803	0.0146556	23.7848	0.321059	0.536279	0.640639	24	DOWN	NO CHANGE	NO CHANGE
TC0800001494.mm.2	Trappc2l	3.48934e-07	0.0858113	8.08875	7.84069	-0.248056	0.00574146	0.543818	0.175122	-0.368696	0.00414193	11.5807	8.63301	-2.94764	0.13582	24	DOWN	NO CHANGE	DOWN
TC0100001123.mm.2	Acmsd	3.59548e-07	0.000486662	10.34	9.91321	-0.426786	0.0336087	1.33333	0.866033	-0.4673	0.0986769	19.5922	20.3233	0.731118	0.475454	24	NO CHANGE	NO CHANGE	DOWN
TC1800000160.mm.2	Rnf125	4.00974e-07	4.33938e-08	15.2567	15.0268	-0.229881	0.335402	1.8372	1.80468	-0.0325257	0.922446	0.553763	1.74122	1.18745	0.098776	24	NO CHANGE	NO CHANGE	NO CHANGE
TC0900001921.mm.2	Dpy19l1	4.1546e-07	0.0261815	8.85417	7.26306	-1.59111	1.7849e-22	0.287001	0.261183	-0.0258174	0.82208	17.2067	18.3417	1.13502	0.484801	24	NO CHANGE	NO CHANGE	DOWN
TC1700001677.mm.2	Fam195a	4.31886e-07	0.0029392	5.55875	5.32774	-0.231012	0.0728576	0.702142	0.497602	-0.20454	0.250669	17.2412	16.757	-0.484181	0.689124	24	NO CHANGE	NO CHANGE	NO CHANGE
TC1900001095.mm.2	Fads2	4.4147e-07	0.00172427	17.3304	18.2544	0.924028	8.26347e-15	0.600753	0.255411	-0.345342	0.00309498	10.5479	13.8237	3.27572	0.0149117	24	DOWN	DELAY	UP
TC0400001034.mm.2	Ak4	4.42296e-07	2.19065e-08	10.295	8.44351	-1.85149	6.96055e-18	1.04242	0.905669	-0.13675	0.448786	13.1087	13.007	-0.101659	0.886471	24	NO CHANGE	NO CHANGE	DOWN
TC0900002332.mm.2	Nrg4	4.47658e-07	0.000206177	7.2425	7.6794	0.436905	0.113313	1.75245	1.33627	-0.416177	0.281886	12.2745	13.0848	0.810237	0.410413	24	NO CHANGE	NO CHANGE	NO CHANGE
TC0400003530.mm.2	Thrap3	4.51893e-07	0.00239274	10.6367	10.636	-0.000654762	0.994738	0.567023	0.408915	-0.158107	0.266463	5.80058	7.95552	2.15493	0.0640749	24	NO CHANGE	NO CHANGE	NO CHANGE
TC1200002296.mm.2	Clmn	4.9485e-07	0.00022628	11.4642	10.6105	-0.853631	2.33967e-07	0.788868	0.742242	-0.0466267	0.813926	8.69585	8.66967	-0.0261757	0.978519	24	NO CHANGE	NO CHANGE	DOWN
TC1700002655.mm.2	Abcg5	4.95531e-07	0.000250431	11.7217	14.3195	2.59786	6.3223e-17	1.32058	0.875967	-0.444612	0.107723	9.31796	9.08495	-0.233005	0.813334	24	NO CHANGE	NO CHANGE	UP
TC1300002099.mm.2	Hnrnpk	5.04549e-07	0.159081	16.7825	16.837	0.0545437	0.275493	0.305144	0.0813257	-0.223818	0.00260635	5.58361	7.03266	1.44906	0.552927	24	DOWN	NO CHANGE	NO CHANGE
TC0500000740.mm.2	Polr2b	5.17147e-07	0.0213685	12.1733	11.5151	-0.658194	8.00762e-11	0.607324	0.155562	-0.451761	0.000118061	15.7036	15.2135	-0.490091	0.805783	24	DOWN	NO CHANGE	DOWN
TC1900000866.mm.2	Grk5	5.88112e-07	0.0461663	6.91542	6.34139	-0.574028	0.0022162	1.36841	0.323021	-1.04539	0.000132462	23.9558	18.4305	-5.52535	0.0148318	24	DOWN	ADVANCE	DOWN
TC0900003008.mm.2	Acy1	6.32544e-07	0.0126762	10.2796	10.171	-0.108552	0.297622	0.535476	0.348224	-0.187251	0.208069	15.6577	20.0479	4.39013	0.00216354	24	NO CHANGE	DELAY	NO CHANGE
TC0700000816.mm.2	Vrk3	6.4254e-07	0.00541168	9.0975	9.13091	0.0334127	0.703176	0.48069	0.320277	-0.160414	0.198045	6.49457	6.26539	-0.229176	0.856679	24	NO CHANGE	NO CHANGE	NO CHANGE
TC1900000205.mm.2	Ddb1	6.5049e-07	0.0328411	11.9375	11.6859	-0.251587	0.000219804	0.30952	0.180034	-0.129487	0.151782	10.8623	9.00896	-1.85335	0.22643	24	NO CHANGE	NO CHANGE	DOWN
TC1100003224.mm.2	Serpinf2	6.55844e-07	7.20062e-05	16.9425	16.9314	-0.0110714	0.849084	0.370175	0.305376	-0.0647994	0.4274	4.33148	4.46576	0.134277	0.888528	24	NO CHANGE	NO CHANGE	NO CHANGE
TC0800001891.mm.2	1810011O10Rik	6.58052e-07	0.000954999	6.64708	7.35954	0.71246	0.000317903	0.959643	0.832875	-0.126768	0.620028	14.8221	14.9289	0.106784	0.924136	24	NO CHANGE	NO CHANGE	UP
TC1300000735.mm.2	Dapk1	6.60845e-07	3.7053e-06	11.3333	11.6115	0.278155	0.0134812	0.716458	0.723788	0.00732915	0.962137	22.6456	23.6883	1.04273	0.200811	24	NO CHANGE	NO CHANGE	UP
TC0300001306.mm.2	Elovl6	7.20744e-07	0.374895	13.705	16.1872	2.48216	1.31899e-13	1.5018	0.224927	-1.27687	0.00035305	12.8386	21.8406	9.00196	0.025664	24	DOWN	NO CHANGE	UP
TC1900000610.mm.2	Marveld1	7.32134e-07	9.92503e-07	9.98792	9.52655	-0.461369	0.000161972	0.829839	0.686563	-0.143276	0.362573	14.4127	14.8161	0.403386	0.622358	24	NO CHANGE	NO CHANGE	DOWN
TC0500000277.mm.2	Dnajb6	7.7947e-07	0.00192246	13.225	13.1136	-0.111429	0.0835815	0.446629	0.218555	-0.228074	0.0143514	14.5699	12.3688	-2.20111	0.0794535	24	DOWN	NO CHANGE	NO CHANGE
TC1900000018.mm.2	Chka	7.87937e-07	0.00535195	6.03542	4.62488	-1.41054	1.14862e-07	1.70055	0.596021	-1.10453	0.00108898	21.7031	20.7082	-0.994805	0.506659	24	DOWN	NO CHANGE	DOWN
TC0200002067.mm.2	Plcb4	7.98455e-07	0.0398763	5.32333	5.44911	0.125774	0.194586	0.522606	0.25297	-0.269636	0.0543405	21.4442	20.7462	-0.697947	0.662518	24	NO CHANGE	NO CHANGE	NO CHANGE
TC1200001971.mm.2	Atp6v1d	8.00741e-07	0.00322601	8.61792	8.44448	-0.173433	0.0423653	0.56278	0.277006	-0.285774	0.0182083	14.4073	14.3364	-0.0709088	0.956642	24	DOWN	NO CHANGE	DOWN
TC1100002728.mm.2	Leap2	8.52291e-07	0.000110924	10.4258	10.8595	0.433671	0.0418339	1.07689	1.22358	0.146696	0.621925	20.9528	22.3452	1.39241	0.156257	24	NO CHANGE	NO CHANGE	UP
TC0600002013.mm.2	Lncpint	8.53058e-07	0.000112808	10.1392	9.71173	-0.42744	0.0033151	0.97898	0.634381	-0.344599	0.0849397	6.99682	8.26831	1.27149	0.200829	24	NO CHANGE	NO CHANGE	DOWN
TC1100000440.mm.2	Rnf145	8.5746e-07	0.000199187	9.84875	10.0022	0.153413	0.234088	0.832552	0.60831	-0.224242	0.220596	10.5817	12.42	1.83829	0.0696808	24	NO CHANGE	NO CHANGE	NO CHANGE
TC1400000574.mm.2	Pnp	8.66995e-07	0.00184856	11.03	11.7831	0.753056	5.36076e-06	0.9558	0.541312	-0.414487	0.049788	22.7136	23.8314	1.11774	0.342202	24	DOWN	NO CHANGE	UP
TC0600003598.mm.2	Cml3	8.78956e-07	0.0276997	4.88708	3.71141	-1.17567	2.29182e-08	1.30842	0.338054	-0.970362	0.000216041	16.8138	17.5372	0.723343	0.724532	24	DOWN	NO CHANGE	DOWN
TC1300000016.mm.2	Akr1c14	8.89058e-07	0.00188277	16.2408	14.6714	-1.5694	3.71256e-17	0.667291	0.460453	-0.206838	0.203881	14.1653	11.8563	-2.30902	0.0472651	24	NO CHANGE	ADVANCE	DOWN
TC1000000355.mm.2	Ddo	8.9596e-07	0.00196848	6.99958	6.38381	-0.615774	3.19513e-06	0.66829	0.454752	-0.213537	0.189734	16.1787	17.2628	1.08414	0.363786	24	NO CHANGE	NO CHANGE	DOWN
TC1200001281.mm.2	Crip2	8.9945e-07	0.0597953	8.72667	8.5625	-0.164167	0.301746	0.889933	0.356966	-0.532966	0.0199427	23.0993	2.60487	3.50561	0.0653683	24	DOWN	NO CHANGE	NO CHANGE
TC1300000266.mm.2	Slc17a3	1.04846e-06	0.000878919	11.8238	12.4929	0.669107	2.80997e-06	0.775445	0.527868	-0.247577	0.16783	18.2526	21.6549	3.40228	0.00273319	24	NO CHANGE	DELAY	UP
TC0300000967.mm.2	Fmo5	1.09665e-06	1.32254e-06	15.8879	14.2278	-1.66008	3.60319e-19	0.568178	0.813649	0.245472	0.0996175	16.1037	15.3883	-0.715348	0.408703	24	NO CHANGE	NO CHANGE	DOWN
TC0500003708.mm.2	Mrpl33	1.16771e-06	0.611449	11.7129	11.6834	-0.029504	0.555501	0.278427	0.0289069	-0.24952	0.000858969	16.9471	15.8006	-1.14656	0.867245	24	DOWN	NO CHANGE	NO CHANGE
TC0100002800.mm.2	Hes6	1.17155e-06	0.35029	8.13208	8.68083	0.54875	0.0450231	1.01841	0.328536	-0.689872	0.070684	15.5646	17.1712	1.60666	0.631782	24	NO CHANGE	NO CHANGE	UP
TC0800001319.mm.2	Vac14	1.17952e-06	0.0360305	8.71333	8.4446	-0.26873	0.0163394	0.634206	0.266007	-0.368199	0.0189896	14.748	14.1456	-0.60243	0.725324	24	DOWN	NO CHANGE	DOWN
TC0400003756.mm.2	Clic4	1.25894e-06	0.0993407	10.1929	10.3383	0.145357	0.0870077	0.428287	0.173315	-0.254972	0.0360976	22.5815	0.396894	1.81536	0.363433	24	DOWN	NO CHANGE	NO CHANGE
TC0600002966.mm.2	Tmcc1	1.30454e-06	2.38051e-05	10.6837	9.74065	-0.943095	2.08537e-10	0.82451	0.536245	-0.288265	0.0759337	14.5131	14.1881	-0.325	0.739619	24	NO CHANGE	NO CHANGE	DOWN
TC0200003607.mm.2	Rbms1	1.32102e-06	0.0261926	12.5446	12.1016	-0.442956	0.00106698	0.704055	0.353498	-0.350557	0.0576208	6.34109	8.67935	2.33826	0.129067	24	NO CHANGE	NO CHANGE	DOWN
TC0700004221.mm.2	Gga2	1.34538e-06	0.00520044	6.12	5.94895	-0.171052	0.023585	0.385116	0.267294	-0.117823	0.256065	19.814	18.0359	-1.77811	0.172292	24	NO CHANGE	NO CHANGE	DOWN
TC1100001047.mm.2	Cluh	1.35035e-06	5.14398e-06	15.07	14.5729	-0.497083	1.08687e-09	0.479937	0.314677	-0.16526	0.0696968	23.9702	2.92896	2.9588	0.00296819	24	NO CHANGE	DELAY	DOWN
TC0500000008.mm.2	Cdk6	1.37966e-06	0.0344016	9.80375	9.31496	-0.48879	3.46809e-08	0.42467	0.183419	-0.241251	0.0233362	8.64771	7.51359	-1.13412	0.493648	24	DOWN	NO CHANGE	DOWN
TC0300002242.mm.2	Trim2	1.45501e-06	0.00561461	8.34375	8.04258	-0.301171	0.03956	0.876275	0.478135	-0.39814	0.055832	22.7921	23.075	0.282834	0.825902	24	NO CHANGE	NO CHANGE	DOWN
TC0200000740.mm.2	Kynu	1.48863e-06	6.6532e-06	13.9	13.8694	-0.0306151	0.685916	0.549906	0.392806	-0.1571	0.1464	0.807705	1.29046	0.482757	0.596107	24	NO CHANGE	NO CHANGE	NO CHANGE
TC0100000097.mm.2	Rdh10	1.52695e-06	0.0470029	7.89125	8.32006	0.42881	4.13771e-06	0.456929	0.195043	-0.261886	0.0273548	16.0801	12.6904	-3.38976	0.0566721	24	DOWN	NO CHANGE	UP
TC1300000671.mm.2	Ddx46	1.54099e-06	4.92469e-05	9.2725	9.38613	0.113631	0.213591	0.52874	0.522733	-0.00600744	0.962944	8.25605	9.12215	0.866107	0.349158	24	NO CHANGE	NO CHANGE	NO CHANGE
TC0400001924.mm.2	Mthfr	1.64151e-06	0.0542276	7.21333	7.40502	0.191687	0.128861	0.804586	0.260047	-0.544539	0.00363407	23.4422	23.2856	-0.156571	0.934578	24	DOWN	NO CHANGE	NO CHANGE
TC0100002349.mm.2	Pgap1	1.66751e-06	0.000418106	9.06667	8.04087	-1.02579	4.96214e-11	0.763775	0.497272	-0.266504	0.115327	9.29583	11.4899	2.19407	0.0443209	24	NO CHANGE	DELAY	DOWN
TC1700001062.mm.2	Man2a1	1.67215e-06	2.92326e-05	13.1942	13.0871	-0.107103	0.25493	0.636555	0.470992	-0.165563	0.213576	12.7295	13.1739	0.444392	0.638988	24	NO CHANGE	NO CHANGE	NO CHANGE
TC1300002474.mm.2	Hmgcr	1.76155e-06	0.111871	13.2888	15.3011	2.01238	5.90822e-10	1.27235	0.490188	-0.782163	0.0314119	12.7516	14.614	1.8624	0.389244	24	DOWN	NO CHANGE	UP
TC0500001410.mm.2	Setd1b	1.77246e-06	0.000865204	7.83	7.41685	-0.413155	0.000284221	0.652935	0.42387	-0.229065	0.127219	6.27467	6.90978	0.635105	0.575335	24	NO CHANGE	NO CHANGE	DOWN
TC1100002897.mm.2	Shmt1	1.84729e-06	0.067342	12.3117	13.7342	1.42252	7.78366e-16	0.478888	0.269034	-0.209855	0.186423	16.3361	16.3738	0.0376959	0.98394	24	NO CHANGE	NO CHANGE	UP
TC1000002695.mm.2	Amdhd1	1.86352e-06	8.0376e-06	11.7579	11.4863	-0.271567	0.0192229	0.685121	0.687195	0.00207455	0.989451	1.57261	3.06791	1.4953	0.0990981	24	NO CHANGE	NO CHANGE	DOWN
TC0200000879.mm.2	Upp2	1.8846e-06	0.000130987	14.5929	15.4033	0.810397	0.00104873	1.61488	0.990218	-0.624659	0.0628844	11.6843	12.0289	0.34459	0.741213	24	NO CHANGE	NO CHANGE	UP
TC1100003462.mm.2	Ypel2	1.90768e-06	1.45199e-05	7.53125	7.69272	0.161468	0.42086	1.39512	1.02205	-0.373074	0.191959	23.0855	0.783256	1.69776	0.0727082	24	NO CHANGE	NO CHANGE	NO CHANGE
TC1700000500.mm.2	BC004004	1.9259e-06	0.0310035	13.1346	12.9897	-0.144841	0.0910672	0.458342	0.218741	-0.239601	0.0474426	0.571605	5.16952	4.59792	0.00824611	24	DOWN	DELAY	NO CHANGE
TC0300002797.mm.2	S1pr1	1.97706e-06	0.00111384	8.79667	8.16044	-0.63623	1.5181e-06	0.705742	0.454185	-0.251557	0.12639	21.0811	20.1158	-0.965234	0.397185	24	NO CHANGE	NO CHANGE	DOWN
TC0700000554.mm.2	Polr2i	1.97734e-06	0.00180733	9.69292	9.42843	-0.264484	0.00413743	0.480742	0.351441	-0.129302	0.295939	16.4746	14.4816	-1.99302	0.101239	24	NO CHANGE	NO CHANGE	DOWN
TC1100003300.mm.2	Tmem97	2.00728e-06	0.00263479	12.6188	14.1094	1.49069	2.73719e-23	0.523571	0.209197	-0.314375	0.00360971	11.4509	13.3735	1.92252	0.188049	24	DOWN	NO CHANGE	UP
TC0800002552.mm.2	Scoc	2.04321e-06	0.0214629	8.12833	8.43357	0.305238	0.0029948	0.496396	0.292574	-0.203822	0.148319	16.7388	21.7926	5.05379	0.00117425	24	NO CHANGE	DELAY	UP
TC1300000919.mm.2	Glrx	2.06863e-06	0.17326	12.2775	13.412	1.13452	3.07528e-14	0.472839	0.176878	-0.295962	0.0445072	16.0909	10.7529	-5.33795	0.0241569	24	DOWN	NO CHANGE	UP
TC0700004474.mm.2	Bnip3	2.09669e-06	1.96737e-06	11.3821	9.97266	-1.40942	7.6139e-14	0.807355	0.866815	0.05946	0.744317	12.4485	12.6334	0.184856	0.823536	24	NO CHANGE	NO CHANGE	DOWN
TC0100002354.mm.2	Hspd1	2.10078e-06	0.00336569	14.6854	14.5139	-0.171528	0.021414	0.36881	0.284931	-0.0838792	0.415127	16.5369	19.8119	3.275	0.00991537	24	NO CHANGE	DELAY	DOWN
TC1700000496.mm.2	Cdkn1a	2.1417e-06	8.94265e-06	5.45292	7.35821	1.9053	1.10896e-06	2.04206	2.10144	0.0593854	0.901129	22.8397	20.2674	-2.57231	0.00484553	24	NO CHANGE	ADVANCE	UP
TC0200003753.mm.2	Gpr155	2.17724e-06	3.32301e-06	9.34917	8.4254	-0.92377	1.54914e-09	0.741033	0.788115	0.0470827	0.78175	15.3961	18.9109	3.51477	0.000158773	24	NO CHANGE	DELAY	DOWN
TC0200001524.mm.2	Slc1a2	2.2022e-06	0.0745656	11.3304	9.75353	-1.57688	1.00045e-11	0.547476	0.434965	-0.112511	0.642385	10.7603	11.3324	0.572118	0.761787	24	NO CHANGE	NO CHANGE	DOWN
TC0600000655.mm.2	Plekha8	2.21401e-06	0.000180243	8.985	9.01996	0.0349603	0.743016	0.674516	0.479506	-0.19501	0.195112	14.6281	15.6737	1.04558	0.327324	24	NO CHANGE	NO CHANGE	NO CHANGE
TC0500003000.mm.2	Ulk1	2.21837e-06	2.73635e-06	7.02042	8.29063	1.27022	3.18074e-11	0.98813	0.816523	-0.171607	0.395659	6.17582	6.79394	0.618121	0.47743	24	NO CHANGE	NO CHANGE	UP
TC1400001314.mm.2	Ipo5	2.23053e-06	6.0059e-05	9.9375	9.97933	0.0418254	0.58132	0.42603	0.420306	-0.00572393	0.957126	13.0053	13.9435	0.938192	0.337173	24	NO CHANGE	NO CHANGE	NO CHANGE
TC0200000603.mm.2	Angptl2	2.23644e-06	0.00118842	6.70292	7.275	0.572083	2.61342e-06	0.40315	0.520801	0.117651	0.434061	10.1299	12.478	2.34803	0.0676843	24	NO CHANGE	NO CHANGE	UP
TC1000001679.mm.2	Syne1	2.26927e-06	0.139628	8.92917	6.30788	-2.62129	2.62591e-20	1.0232	0.219632	-0.803569	0.000544166	1.30376	14.7824	-10.5213	0.000526009	24	DOWN	NO CHANGE	DOWN
TC0500001590.mm.2	Hspb1	2.3526e-06	7.361e-05	8.91083	6.91081	-2.00002	1.01573e-10	1.58405	1.07084	-0.513214	0.126558	18.3363	19.0585	0.722228	0.476613	24	NO CHANGE	NO CHANGE	DOWN
TC0400003894.mm.2	Efhd2	2.35385e-06	1.39829e-05	6.72167	6.54389	-0.177778	0.0978331	0.614008	0.638216	0.0242077	0.869991	11.3909	14.8419	3.45098	0.000505563	24	NO CHANGE	DELAY	NO CHANGE
TC0100003104.mm.2	Adora1	2.35655e-06	0.0237374	9.05042	5.89562	-3.1548	2.31531e-24	0.875728	0.369585	-0.506143	0.0169005	7.43087	12.183	4.75211	0.00506347	24	DOWN	DELAY	DOWN
TC1900000801.mm.2	Nhlrc2	2.38173e-06	2.85267e-05	7.20208	6.90524	-0.296845	0.000662	0.457796	0.483913	0.0261169	0.820263	13.5776	12.5564	-1.02124	0.274569	24	NO CHANGE	NO CHANGE	DOWN
TC0200000222.mm.2	Il15ra	2.40844e-06	0.000432525	9.86875	10.2373	0.368552	0.00454311	0.754167	0.546865	-0.207302	0.243248	8.01055	8.62996	0.619404	0.55871	24	NO CHANGE	NO CHANGE	UP
TC0200001223.mm.2	Timm10	2.49062e-06	0.00182265	7.0175	7.22637	0.208869	0.0204438	0.418889	0.37674	-0.0421494	0.732514	13.5382	19.0013	5.46311	3.77147e-05	24	NO CHANGE	DELAY	UP
TC1800000994.mm.2	Npc1	2.50224e-06	2.26312e-05	10.4112	10.3431	-0.0681746	0.572467	0.605572	0.795547	0.189975	0.273476	8.46105	9.01544	0.554394	0.558473	24	NO CHANGE	NO CHANGE	NO CHANGE
TC1200001549.mm.2	Rnf144a	2.59754e-06	0.00144331	5.92833	6.18671	0.258373	0.0295031	0.600752	0.49467	-0.106082	0.517549	0.291704	0.477107	0.185403	0.872059	24	NO CHANGE	NO CHANGE	UP
TC1100001564.mm.2	Ppp1r1b	2.67417e-06	0.0398638	5.15125	4.24008	-0.911171	2.25168e-08	0.714109	0.33616	-0.377949	0.0512401	18.4683	20.5377	2.06941	0.216051	24	NO CHANGE	NO CHANGE	DOWN
TC0700004610.mm.2	Ccnd1; Mir3962	2.72353e-06	0.000958021	9.33125	11.8494	2.51812	1.57091e-16	0.944615	0.874705	-0.0699096	0.795433	8.884	12.1101	3.22605	0.0061308	24	NO CHANGE	DELAY	UP
TC1100001841.mm.2	Map2k6	2.72515e-06	0.00219713	7.38875	6.68921	-0.699544	7.33228e-07	0.800591	0.387042	-0.41355	0.0180562	13.2865	14.7099	1.42333	0.295007	24	DOWN	NO CHANGE	DOWN
TC0400000212.mm.2	Ndufaf4	2.90065e-06	1.01183e-05	11.7804	12.1013	0.320853	0.00186597	0.646478	0.516306	-0.130172	0.342419	15.2818	17.84	2.5582	0.00835442	24	NO CHANGE	DELAY	UP
TC1500001531.mm.2	Enpp2	2.92279e-06	0.0086575	12.1813	9.24034	-2.94091	5.81378e-26	0.580422	0.423283	-0.157139	0.362415	12.4369	13.5615	1.12452	0.414016	24	NO CHANGE	NO CHANGE	DOWN
TC0800002385.mm.2	Rfxank	3.10168e-06	0.00109773	7.38708	6.74317	-0.643909	3.33758e-05	0.964962	0.463457	-0.501505	0.0151011	21.7513	21.8334	0.082115	0.947902	24	DOWN	NO CHANGE	DOWN
TC0500000819.mm.2	Slc4a4	3.11856e-06	0.000545193	8.6925	8.06476	-0.627738	6.49299e-05	0.742841	0.659354	-0.0834875	0.67595	5.05907	5.87276	0.813695	0.464751	24	NO CHANGE	NO CHANGE	DOWN
TC0600002056.mm.2	Wdr91	3.29162e-06	6.95015e-06	9.24833	10.1604	0.912063	7.80998e-10	0.550141	0.828845	0.278704	0.092755	23.7771	1.3552	1.57809	0.105428	24	NO CHANGE	NO CHANGE	UP
TC0600001051.mm.2	Txnrd3	3.30699e-06	0.764908	5.4325	5.98921	0.556706	3.19147e-05	0.69824	0.0392219	-0.659018	0.000381408	10.9046	9.14963	-1.755	0.879573	24	DOWN	NO CHANGE	UP
TC0100000393.mm.2	Coq10b	3.33257e-06	6.03516e-08	8.82792	9.48534	0.657421	0.000254885	1.18462	1.10659	-0.0780246	0.740429	11.3398	11.631	0.291212	0.707127	24	NO CHANGE	NO CHANGE	UP
TC1900000320.mm.2	Nmrk1	3.43964e-06	0.000190161	11.4925	11.2783	-0.214246	0.164812	1.00052	0.629804	-0.370716	0.0879025	13.5554	15.0179	1.46249	0.193622	24	NO CHANGE	NO CHANGE	NO CHANGE
TC0900003328.mm.2	Rsl24d1	3.47245e-06	0.482918	7.16	7.19192	0.0319246	0.734857	0.334704	0.0890846	-0.24562	0.0721919	14.2885	7.88167	-6.40687	0.130845	24	NO CHANGE	NO CHANGE	NO CHANGE
TC1900000882.mm.2	Lrp5	3.54346e-06	0.000121732	9.3225	9.74946	0.426964	0.000187801	0.654084	0.480558	-0.173526	0.241161	0.68003	2.46745	1.78742	0.093261	24	NO CHANGE	NO CHANGE	UP
TC0100002308.mm.2	Myo1b	3.59326e-06	4.75702e-06	14.3683	13.4816	-0.886687	3.78145e-14	0.450431	0.530128	0.079697	0.479549	22.0306	0.156289	2.12569	0.0188449	24	NO CHANGE	DELAY	DOWN
TC1600001722.mm.2	Alcam	3.59761e-06	0.0223898	12.2654	11.6115	-0.653869	2.59671e-05	0.669901	0.417133	-0.252768	0.207521	6.82951	9.56288	2.73338	0.0705214	24	NO CHANGE	NO CHANGE	DOWN
TC1100003928.mm.2	Tex2	3.64363e-06	0.00512505	11.4508	10.9076	-0.543274	2.78615e-06	0.508696	0.360426	-0.14827	0.296541	0.758998	2.65993	1.90093	0.157333	24	NO CHANGE	NO CHANGE	DOWN
TC1500001410.mm.2	Klf10	3.64899e-06	0.266029	6.84917	6.53625	-0.312917	0.122836	1.1478	0.243597	-0.904205	0.00252839	8.84153	12.9102	4.06869	0.212709	24	DOWN	NO CHANGE	NO CHANGE
TC1100003019.mm.2	Ndel1	3.6566e-06	0.118718	11.0896	11.0646	-0.0249405	0.789822	0.47593	0.173529	-0.3024	0.0255379	11.8562	14.3363	2.48013	0.271627	24	DOWN	NO CHANGE	NO CHANGE
TC0700001800.mm.2	Sbk1	3.68048e-06	0.0584148	3.2575	3.87692	0.619425	2.13267e-06	0.441463	0.287921	-0.153542	0.337532	11.8161	13.7376	1.92157	0.291722	24	NO CHANGE	NO CHANGE	UP
TC1000002668.mm.2	Slc25a3	3.70276e-06	0.00579098	14.9437	15.1778	0.234048	5.89177e-07	0.220423	0.133047	-0.0873754	0.124097	17.2192	17.766	0.546831	0.687463	24	NO CHANGE	NO CHANGE	UP
TC0700001005.mm.2	Ttc23	3.90615e-06	3.17847e-05	9.84375	10.0009	0.157143	0.234823	0.773892	0.715897	-0.0579948	0.753246	15.3532	18.0159	2.66272	0.0079361	24	NO CHANGE	DELAY	NO CHANGE
TC1900001485.mm.2	Sorbs1	3.93308e-06	0.000326073	10.3133	9.20454	-1.10879	3.44843e-11	0.778301	0.537675	-0.240626	0.181993	7.35276	9.65603	2.30326	0.0352428	24	NO CHANGE	DELAY	DOWN
TC0900001462.mm.2	Kif9	4.05219e-06	0.352913	3.47875	3.38069	-0.0980556	0.218588	0.412089	0.083882	-0.328207	0.00483959	0.0193106	2.30706	2.28774	0.543729	24	DOWN	NO CHANGE	NO CHANGE
TC1600000443.mm.2	Pcyt1a	4.05421e-06	0.0016955	10.5833	10.1723	-0.410992	3.8272e-06	0.492804	0.261575	-0.231229	0.0379984	15.3182	15.1736	-0.144561	0.912212	24	DOWN	NO CHANGE	DOWN
TC0900001414.mm.2	Impdh2	4.14541e-06	0.00833391	9.01167	8.80476	-0.206905	0.0733461	0.507178	0.395485	-0.111693	0.481835	14.3866	15.9954	1.60884	0.257988	24	NO CHANGE	NO CHANGE	NO CHANGE
TC0500000306.mm.2	Khk	4.1668e-06	0.0186977	13.7458	13.8686	0.122738	0.374178	0.627351	0.434994	-0.192357	0.330352	17.5906	21.2732	3.68263	0.0146139	24	NO CHANGE	DELAY	NO CHANGE
TC0200001951.mm.2	Slc20a1	4.16739e-06	1.40778e-07	9.97792	10.9198	0.941885	2.74033e-08	0.99773	0.813791	-0.183938	0.347637	11.6021	13.9035	2.30145	0.00912464	24	NO CHANGE	DELAY	UP
TC1600002177.mm.2	Dexi	4.19703e-06	0.00929574	9.48	10.4137	0.93371	2.26005e-09	0.702414	0.384254	-0.318161	0.0763894	20.7618	20.7965	0.0346338	0.980068	24	NO CHANGE	NO CHANGE	UP
TC1700001265.mm.2	Abcg8	4.24649e-06	2.92328e-05	11.4863	13.6613	2.17506	1.75236e-13	1.1996	1.13381	-0.0657872	0.819844	7.93897	7.28821	-0.650754	0.491754	24	NO CHANGE	NO CHANGE	UP
TC1300000009.mm.2	Asb13	4.28914e-06	0.0360805	10.2425	10.0514	-0.191111	0.0521192	0.531437	0.239375	-0.292063	0.0383659	21.6468	22.9542	1.30744	0.434491	24	DOWN	NO CHANGE	NO CHANGE
TC1500000605.mm.2	Gpt	4.4598e-06	0.0212695	12.3358	12.0308	-0.30504	0.00363832	0.483151	0.286719	-0.196432	0.16371	16.4888	17.1951	0.706295	0.653406	24	NO CHANGE	NO CHANGE	DOWN
TC1600001553.mm.2	Dirc2	4.46988e-06	0.00665715	10.7979	11.4004	0.60248	1.00451e-05	0.690273	0.390639	-0.299634	0.0868873	2.47244	8.7797	6.30726	2.66551e-05	24	NO CHANGE	DELAY	UP
TC1700000484.mm.2	Mapk14	4.54319e-06	0.00709809	10.8013	10.8641	0.0628373	0.470654	0.543945	0.243876	-0.300069	0.0170369	14.7705	15.5922	0.821692	0.591772	24	DOWN	NO CHANGE	NO CHANGE
TC1400001275.mm.2	Gpr180	4.55187e-06	0.0922072	6.40625	6.30123	-0.10502	0.331699	0.491851	0.22474	-0.267111	0.0814733	15.4709	15.287	-0.183849	0.928911	24	NO CHANGE	NO CHANGE	NO CHANGE
TC0700000445.mm.2	Cyp2a5; Cyp2a4	4.55719e-06	0.000488269	17.9104	18.4507	0.540278	0.000862701	1.04011	0.527191	-0.512915	0.0214063	14.2705	11.3621	-2.90848	0.0210376	24	DOWN	ADVANCE	UP
TC1100000324.mm.2	Cpeb4	4.83044e-06	0.035989	11.0062	10.604	-0.402262	0.00267222	0.634593	0.321777	-0.312816	0.0833664	0.989132	2.77136	1.78223	0.303517	24	NO CHANGE	NO CHANGE	DOWN
TC0500000303.mm.2	Agbl5	4.86748e-06	0.00704814	6.32	6.11101	-0.208988	0.0353184	0.569734	0.301019	-0.268715	0.0567527	7.34876	11.1818	3.83304	0.00765869	24	NO CHANGE	DELAY	DOWN
TC0600003601.mm.2	Foxp1	4.88891e-06	0.00824834	10.8575	10.8829	0.025377	0.826236	0.716013	0.32713	-0.388883	0.0213509	3.40188	7.04173	3.63985	0.0185996	24	DOWN	DELAY	NO CHANGE
TC0100000890.mm.2	Ube2f	4.94077e-06	0.0234275	12.6713	12.8077	0.136448	0.0585879	0.452291	0.155912	-0.296379	0.00429645	17.6521	15.9281	-1.72406	0.362211	24	DOWN	NO CHANGE	NO CHANGE
TC1600000650.mm.2	Naa50	5.03649e-06	0.000574902	11.765	11.3628	-0.402242	7.45368e-05	0.461276	0.434894	-0.0263824	0.839816	12.3802	12.3284	-0.0517855	0.962636	24	NO CHANGE	NO CHANGE	DOWN
TC0600003146.mm.2	Plekhg6	5.16354e-06	0.0861908	4.83542	4.47409	-0.361329	0.000710077	0.527739	0.198015	-0.329724	0.0228452	9.88507	1.16064	-8.72442	0.000121335	24	DOWN	NO CHANGE	DOWN
TC0500001228.mm.2	Fam222a	5.20268e-06	0.150181	4.73667	4.21308	-0.523591	2.80215e-05	0.684666	0.165915	-0.518751	0.00218824	22.7087	22.957	0.248367	0.924584	24	DOWN	NO CHANGE	DOWN
TC1300002445.mm.2	Scamp1	5.22831e-06	0.0511522	10.8904	9.1	-1.79042	7.09175e-19	0.737773	0.223947	-0.513826	0.00314198	9.44506	9.28183	-0.163224	0.936013	24	DOWN	NO CHANGE	DOWN
TC0500000050.mm.2	Abcb1a	5.23318e-06	0.0307934	6.9975	7.97508	0.977579	1.78661e-05	0.907965	0.576619	-0.331346	0.253823	12.5081	12.0806	-0.427502	0.787528	24	NO CHANGE	NO CHANGE	UP
TC0600002214.mm.2	Zfp786	5.29899e-06	0.769724	3.62833	3.43442	-0.193909	0.142964	0.70668	0.0424412	-0.664239	0.00081981	16.3541	0.769481	8.41539	0.480089	24	DOWN	NO CHANGE	NO CHANGE
TC1100002637.mm.2	Trim41	5.33823e-06	0.0489779	8.70875	8.23823	-0.470516	0.000145373	0.550153	0.270975	-0.279178	0.0834217	14.0902	17.1357	3.04548	0.0990931	24	NO CHANGE	NO CHANGE	DOWN
TC0700001198.mm.2	Stard5	5.44524e-06	0.00331587	13.3567	13.2575	-0.099127	0.246586	0.44873	0.307041	-0.141689	0.236891	14.2828	15.0371	0.754207	0.563172	24	NO CHANGE	NO CHANGE	NO CHANGE
TC1300001837.mm.2	Eef1e1	5.50198e-06	0.0195868	10.1846	10.2416	0.0570437	0.668865	0.532381	0.418254	-0.114128	0.541742	15.6737	17.1825	1.50872	0.339114	24	NO CHANGE	NO CHANGE	NO CHANGE
TC1000002535.mm.2	Tjp3	5.50805e-06	0.000432931	7.55333	7.20962	-0.34371	0.0210881	0.82553	0.642933	-0.182597	0.377545	21.9366	22.993	1.05646	0.328598	24	NO CHANGE	NO CHANGE	DOWN
TC0100003093.mm.2	Zbed6; Zc3h11a	5.5731e-06	0.000139048	11.8313	11.9056	0.0743452	0.319058	0.405135	0.383696	-0.0214383	0.839665	8.80339	9.02679	0.223403	0.824397	24	NO CHANGE	NO CHANGE	NO CHANGE
TC1900000008.mm.2	Cpt1a	5.69931e-06	0.000655051	13.3487	12.974	-0.374742	0.0459481	0.840778	0.902857	0.062079	0.812745	7.97919	9.59622	1.61704	0.15541	24	NO CHANGE	NO CHANGE	DOWN
TC0500000876.mm.2	Fam47e	5.83137e-06	0.000131931	7.46125	5.96073	-1.50052	7.06006e-13	0.838005	0.709922	-0.128083	0.535584	15.005	17.1295	2.12453	0.0487064	24	NO CHANGE	DELAY	DOWN
TC0800001255.mm.2	Cdh1	5.87294e-06	0.00267617	13.1567	14.6698	1.51312	1.42699e-16	0.592792	0.432884	-0.159908	0.322112	23.6046	1.13631	1.53168	0.22356	24	NO CHANGE	NO CHANGE	UP
TC1100003610.mm.2	Atp5g1	6.00762e-06	0.181532	14.5308	14.892	0.36119	6.88377e-05	0.412637	0.129698	-0.28294	0.0186344	18.4958	19.2072	0.711456	0.780454	24	DOWN	NO CHANGE	UP
TC1100003161.mm.2	Aspa	6.06162e-06	0.0165556	10.2613	9.66657	-0.594683	4.41024e-07	0.511922	0.288045	-0.223878	0.114743	16.8463	17.0895	0.243196	0.87536	24	NO CHANGE	NO CHANGE	DOWN
TC0700003719.mm.2	l7Rn6	6.2959e-06	0.000254525	10.5258	10.9932	0.467321	3.67962e-05	0.609652	0.444455	-0.165197	0.255451	19.8381	19.4993	-0.338808	0.753914	24	NO CHANGE	NO CHANGE	UP
TC0600002635.mm.2	Pcyox1	6.58538e-06	0.00113758	12.8254	12.7025	-0.122937	0.275559	0.556329	0.474154	-0.0821751	0.600046	16.2663	16.2987	0.0324473	0.978474	24	NO CHANGE	NO CHANGE	NO CHANGE
TC0500000536.mm.2	Slc34a2	6.70181e-06	8.94349e-07	4.87417	9.19746	4.32329	5.01052e-19	0.860657	2.6079	1.74724	6.11718e-05	23.2726	22.9855	-0.287085	0.82163	24	UP	NO CHANGE	UP
TC0200003080.mm.2	Arhgap21	6.71083e-06	0.236408	11.1654	11.5583	0.392877	0.00074829	0.687146	0.120408	-0.566737	0.000611413	10.4827	12.8111	2.32843	0.509931	24	DOWN	NO CHANGE	UP
TC1100000850.mm.2	Sco1	6.76753e-06	0.101122	5.77875	5.61724	-0.161508	0.17749	0.485231	0.258559	-0.226672	0.185273	15.8753	10.762	-5.11331	0.0122127	24	NO CHANGE	NO CHANGE	NO CHANGE
TC0700003769.mm.2	Aqp11	6.84178e-06	0.000404858	13.6292	12.8328	-0.796349	1.05249e-08	0.671907	0.454555	-0.217351	0.171282	13.2192	16.8025	3.58337	0.0034186	24	NO CHANGE	DELAY	DOWN
TC0200001377.mm.2	Lrp4	7.00079e-06	0.000573688	8.04958	7.1805	-0.869087	1.8694e-08	0.701754	0.532535	-0.169219	0.341402	12.7233	13.7264	1.00315	0.381436	24	NO CHANGE	NO CHANGE	DOWN
TC1200000280.mm.2	Gdap10	7.21848e-06	0.00133466	6.68958	7.07881	0.389226	0.0107693	0.828494	0.560388	-0.268106	0.198963	9.21932	13.5322	4.3129	0.000936106	24	NO CHANGE	DELAY	UP
TC0600002548.mm.2	Pole4	7.28504e-06	0.00195948	10.8712	10.9625	0.0912302	0.181661	0.427006	0.2124	-0.214606	0.0276113	18.3297	16.8531	-1.47656	0.291024	24	DOWN	NO CHANGE	NO CHANGE
TC1100000771.mm.2	Map2k3	7.3317e-06	0.00523979	9.17583	8.64304	-0.532798	1.86587e-05	0.653043	0.33498	-0.318062	0.0451153	13.7169	16.5702	2.8533	0.0549685	24	DOWN	NO CHANGE	DOWN
TC0300001192.mm.2	Dbt	7.33957e-06	0.00282122	11.5229	11.3325	-0.190417	0.0234395	0.471879	0.279847	-0.192031	0.10161	18.4685	19.4004	0.931861	0.472855	24	NO CHANGE	NO CHANGE	DOWN
TC0700001723.mm.2	Anks4b	7.35831e-06	0.117067	8.2775	8.43994	0.16244	0.24097	0.661712	0.257577	-0.404135	0.0414739	13.3765	13.9557	0.579147	0.794763	24	DOWN	NO CHANGE	NO CHANGE
TC0300001076.mm.2	Slc16a1	7.38464e-06	5.61223e-06	11.0217	11.2175	0.195873	0.0448478	0.641867	0.472287	-0.169581	0.215895	22.8443	23.5606	0.716295	0.452253	24	NO CHANGE	NO CHANGE	UP
TC1500000388.mm.2	Mal2	7.3931e-06	0.000421026	12.3483	12.4875	0.139206	0.207117	0.7574	0.346734	-0.410666	0.0110863	19.7371	19.8535	0.116391	0.929894	24	DOWN	NO CHANGE	NO CHANGE
TC1700002686.mm.2	Mcfd2	7.52417e-06	0.0133152	9.63542	9.45518	-0.180238	0.109845	0.447006	0.369951	-0.077055	0.620982	19.0172	17.4725	-1.54471	0.307791	24	NO CHANGE	NO CHANGE	NO CHANGE
TC0100003125.mm.2	Timm17a	7.79284e-06	0.0249586	10.8346	11.2187	0.384147	0.000119407	0.401753	0.268834	-0.132919	0.3075	11.7026	11.8102	0.107599	0.944526	24	NO CHANGE	NO CHANGE	UP
TC0200000507.mm.2	Rapgef1	8.04212e-06	0.0732421	8.24208	8.57077	0.32869	0.000626997	0.505074	0.176399	-0.328675	0.0131703	10.0655	10.8349	0.769381	0.70465	24	DOWN	NO CHANGE	UP
TC1100002862.mm.2	Flcn	8.08623e-06	0.00351204	8.36375	7.99704	-0.366706	0.0777656	1.45628	0.453706	-1.00257	0.00122921	6.66013	8.27067	1.61054	0.371151	24	DOWN	NO CHANGE	NO CHANGE
TC1000002650.mm.2	Utp20	8.29635e-06	0.146199	6.72792	6.89417	0.16625	0.16476	0.518081	0.210878	-0.307204	0.0687149	15.0121	16.4691	1.45698	0.54062	24	NO CHANGE	NO CHANGE	NO CHANGE
TC0100002965.mm.2	Steap3	8.31076e-06	0.0261811	9.03792	7.76224	-1.27567	3.10858e-12	0.676419	0.352127	-0.324292	0.0882697	0.266096	19.5396	-4.72651	0.00525937	24	NO CHANGE	ADVANCE	DOWN
TC1800000396.mm.2	Rnf14	8.35429e-06	0.169821	10.645	11.2956	0.650635	2.63189e-12	0.381186	0.0945108	-0.286675	0.00366342	9.00527	5.25073	-3.75454	0.193399	24	DOWN	NO CHANGE	UP
TC0200004241.mm.2	Hipk3; Mir1902	8.37601e-06	0.0232887	12.2917	11.2838	-1.0079	3.79263e-15	0.364426	0.252966	-0.11146	0.353087	7.76403	11.0597	3.29565	0.0352046	24	NO CHANGE	DELAY	DOWN
TC1700002788.mm.2	H2-Q8; H2-Q6	8.42399e-06	0.00456454	8.26458	9.24917	0.984583	1.00046e-11	0.408315	0.424462	0.0161473	0.913894	13.8312	18.5277	4.69657	0.00138904	24	NO CHANGE	DELAY	UP
TC1100003993.mm.2	Fam20a	8.43611e-06	9.45456e-06	9.07625	9.40704	0.330794	0.00101114	0.615377	0.450842	-0.164536	0.215684	3.75931	5.09956	1.34024	0.186296	24	NO CHANGE	NO CHANGE	UP
TC1300002766.mm.2	Nsun2	8.74281e-06	0.118346	9.65333	9.52438	-0.128948	0.198933	0.490655	0.181458	-0.309197	0.0314779	12.5436	14.0383	1.49478	0.511884	24	DOWN	NO CHANGE	NO CHANGE
TC1900000636.mm.2	Abcc2	8.76926e-06	1.36597e-06	16.3304	15.9562	-0.374187	1.29175e-05	0.458755	0.495942	0.0371875	0.732163	8.73304	9.2617	0.528668	0.535985	24	NO CHANGE	NO CHANGE	DOWN
TC1900001621.mm.2	Usmg5	8.86242e-06	0.191913	15.7362	16.0063	0.270099	1.49408e-05	0.246273	0.0876697	-0.158604	0.0459016	17.944	17.1516	-0.792451	0.762869	24	DOWN	NO CHANGE	UP
TC1400001930.mm.2	Gch1	9.14822e-06	7.58841e-05	12.7188	14.5393	1.82056	1.47631e-19	0.622218	0.571208	-0.0510094	0.747152	6.88966	6.56997	-0.319692	0.75444	24	NO CHANGE	NO CHANGE	UP
TC1100002664.mm.2	Sqstm1	9.18538e-06	4.10545e-05	14.3288	13.8238	-0.505	7.57577e-11	0.31232	0.323545	0.0112247	0.891553	3.32382	6.30706	2.98324	0.00445387	24	NO CHANGE	DELAY	DOWN
TC1100001853.mm.2	Sox9	9.27037e-06	0.00175499	6.68417	6.36046	-0.32371	0.0378502	0.873406	0.552044	-0.321362	0.142225	22.5926	20.1791	-2.4135	0.0563697	24	NO CHANGE	NO CHANGE	DOWN
TC1700002656.mm.2	Lrpprc	9.45397e-06	0.0162719	10.3708	9.96119	-0.409643	4.54986e-07	0.37018	0.188255	-0.181925	0.0649393	13.8808	14.7048	0.823939	0.607298	24	NO CHANGE	NO CHANGE	DOWN
TC1000002509.mm.2	Mknk2	9.54826e-06	3.04906e-08	9.37917	8.85554	-0.523631	6.76782e-05	0.759107	0.870989	0.111882	0.503027	12.2266	14.5503	2.32378	0.00549267	24	NO CHANGE	DELAY	DOWN
TC0600002616.mm.2	Gm4477	9.58911e-06	0.0847394	5.52417	4.21399	-1.31018	2.02339e-12	0.916563	0.170788	-0.745776	0.000242911	17.1077	14.9054	-2.20225	0.481744	24	DOWN	NO CHANGE	DOWN
TC1600000708.mm.2	Cd47	9.64645e-06	0.0619101	12.9071	13.3951	0.488036	9.05825e-09	0.333736	0.155005	-0.178731	0.0714246	7.22694	7.90465	0.67771	0.715034	24	NO CHANGE	NO CHANGE	UP
TC1100000383.mm.2	Pank3	9.68827e-06	0.0321399	10.2762	10.8776	0.601349	2.58507e-08	0.418274	0.239302	-0.178971	0.160697	11.7182	9.29329	-2.42489	0.13605	24	NO CHANGE	NO CHANGE	UP
TC0800001410.mm.2	Hsd17b2	9.84918e-06	0.00165756	12.5396	13.1701	0.630476	3.0877e-07	0.399516	0.473886	0.0743699	0.612887	2.42175	1.26162	-1.16013	0.374109	24	NO CHANGE	NO CHANGE	UP
TC1100002225.mm.2	Ddc	9.94712e-06	5.74328e-06	11.9375	9.96121	-1.97629	1.00821e-11	1.23096	1.30356	0.0725932	0.811383	21.2015	22.3579	1.15645	0.201813	24	NO CHANGE	NO CHANGE	DOWN
TC0700003831.mm.2	P2ry2	1.00213e-05	0.00228198	6.91625	6.23879	-0.67746	1.12431e-07	0.729027	0.271322	-0.457705	0.00411582	10.9748	11.601	0.626184	0.693835	24	DOWN	NO CHANGE	DOWN
TC1700002526.mm.2	Xdh	1.00375e-05	0.187036	12.63	12.5324	-0.097619	0.257859	0.426579	0.127872	-0.298707	0.0160647	12.5014	16.4419	3.94056	0.156907	24	DOWN	NO CHANGE	NO CHANGE
TC0600003019.mm.2	Wnt5b	1.01728e-05	0.0233066	4.73833	5.24694	0.508611	0.00107444	0.849162	0.345718	-0.503443	0.0179083	15.2664	18.7762	3.50974	0.050551	24	DOWN	NO CHANGE	UP
TC1100001206.mm.2	Psmd11	1.04019e-05	0.000232036	11.1342	10.6022	-0.531964	2.80889e-06	0.453519	0.505752	0.0522329	0.705323	3.74363	4.90994	1.16632	0.302767	24	NO CHANGE	NO CHANGE	DOWN
TC0900002503.mm.2	Hacd3	1.04752e-05	0.000384731	12.4558	12.2049	-0.250972	0.000269694	0.35557	0.278981	-0.0765893	0.400035	13.1638	10.2868	-2.87697	0.0112066	24	NO CHANGE	ADVANCE	DOWN
TC1700001311.mm.2	Ttc7	1.08828e-05	0.0851134	6.78042	6.15782	-0.622599	8.43443e-06	0.714689	0.216471	-0.498218	0.00628728	10.6942	13.071	2.37671	0.303192	24	DOWN	NO CHANGE	DOWN
TC0800002012.mm.2	Rbpms	1.08918e-05	0.00165577	10.6125	10.4443	-0.168234	0.226325	0.66408	0.57348	-0.0905999	0.64358	4.50959	7.57664	3.06704	0.0145921	24	NO CHANGE	DELAY	NO CHANGE
TC0100003449.mm.2	Mpzl1	1.09057e-05	0.000585916	6.46333	7.1905	0.727163	2.36698e-05	0.806014	0.670663	-0.135351	0.533821	23.6441	1.02267	1.37862	0.230573	24	NO CHANGE	NO CHANGE	UP
TC0200003148.mm.2	BC029214	1.1101e-05	0.0339144	5.7475	5.71899	-0.0285119	0.852293	0.866279	0.355221	-0.511058	0.0236552	20.6312	21.163	0.531758	0.762922	24	DOWN	NO CHANGE	NO CHANGE
TC0700001203.mm.2	Mesdc2	1.12931e-05	0.00230939	10.0608	10.0414	-0.0193849	0.866002	0.60938	0.425249	-0.184131	0.260799	16.9932	19.0334	2.04021	0.111713	24	NO CHANGE	NO CHANGE	NO CHANGE
TC0500002420.mm.2	Sel1l3	1.14321e-05	0.0337643	8.4125	9.46196	1.04946	2.88055e-13	0.549872	0.237089	-0.312783	0.0327912	8.18821	8.33127	0.143061	0.934696	24	DOWN	NO CHANGE	UP
TC1600000564.mm.2	Igsf11	1.14828e-05	0.000163736	8.97083	10.452	1.48113	1.28306e-19	0.583504	0.340523	-0.242981	0.0619197	4.88341	5.43356	0.550159	0.647403	24	NO CHANGE	NO CHANGE	UP
TC0700003765.mm.2	Aamdc	1.14872e-05	0.729803	7.20167	7.4826	0.280933	0.0204079	0.538782	0.0476217	-0.49116	0.00471287	13.6002	13.3742	-0.22595	0.981191	24	DOWN	NO CHANGE	UP
TC0400002236.mm.2	Otud6b	1.17144e-05	0.00878616	11.4337	11.3772	-0.0565079	0.435245	0.341544	0.239718	-0.101825	0.320866	14.6734	13.1345	-1.53885	0.279145	24	NO CHANGE	NO CHANGE	NO CHANGE
TC1500001412.mm.2	Azin1	1.19617e-05	0.0955266	13.5929	13.662	0.0690873	0.441746	0.543818	0.140151	-0.403668	0.00246821	11.5807	13.8782	2.29757	0.373301	24	DOWN	NO CHANGE	NO CHANGE
TC0500001113.mm.2	Fgfrl1	1.21961e-05	0.00406737	9.54	9.17488	-0.365119	0.00098196	0.654479	0.288909	-0.36557	0.0171112	8.35311	10.344	1.99085	0.182847	24	DOWN	NO CHANGE	DOWN
TC0700002507.mm.2	Pvr	1.2204e-05	0.00343109	7.08333	7.34933	0.265992	0.0266217	0.612027	0.414759	-0.197268	0.237205	7.50715	12.0667	4.55956	0.000969276	24	NO CHANGE	DELAY	UP
TC1900001163.mm.2	Dtx4	1.24547e-05	2.52957e-05	5.50542	5.15554	-0.349881	0.0146047	0.837352	0.687863	-0.149489	0.448928	23.285	23.6146	0.329623	0.738101	24	NO CHANGE	NO CHANGE	DOWN
TC0500002944.mm.2	Atp5k	1.25386e-05	0.309403	5.52	5.94466	0.424663	0.000164527	0.394932	0.131872	-0.26306	0.0736559	16.9612	4.95888	11.9977	0.000570613	24	NO CHANGE	NO CHANGE	UP
TC0600002668.mm.2	Cnbp	1.25809e-05	0.661485	12.8179	12.5491	-0.26881	1.61981e-05	0.285866	0.0265401	-0.259326	0.00184584	18.7178	19.1447	0.426929	0.957854	24	DOWN	NO CHANGE	DOWN
TC1100001908.mm.2	Llgl2	1.26005e-05	0.231283	8.32458	7.84034	-0.484246	1.68326e-05	0.567095	0.123814	-0.443281	0.00325843	23.1194	23.1996	0.0802358	0.979571	24	DOWN	NO CHANGE	DOWN
TC0600001252.mm.2	Il17rc	1.27307e-05	0.0648389	10.3888	10.3232	-0.065536	0.611915	0.500908	0.313742	-0.187166	0.307523	16.213	18.8659	2.65296	0.159797	24	NO CHANGE	NO CHANGE	NO CHANGE
TC1600001593.mm.2	Ndufb4	1.28918e-05	0.0216823	13.9808	14.1687	0.187817	0.00363369	0.263227	0.184147	-0.0790791	0.365385	19.1154	19.5996	0.484242	0.754734	24	NO CHANGE	NO CHANGE	UP
TC0600003145.mm.2	Ltbr	1.30232e-05	0.000154415	12.12	12.227	0.107024	0.223423	0.471171	0.426744	-0.0444267	0.72142	8.4163	9.24578	0.829482	0.427204	24	NO CHANGE	NO CHANGE	NO CHANGE
TC0500003632.mm.2	Slc46a3	1.30844e-05	0.039033	11.2063	12.1652	0.958948	7.76016e-09	0.805893	0.260151	-0.545742	0.00531693	15.0318	15.5521	0.520237	0.806125	24	DOWN	NO CHANGE	UP
TC1100001632.mm.2	Stat5a	1.30959e-05	0.000647468	7.15833	8.48139	1.32306	5.40699e-19	0.499304	0.316676	-0.182629	0.131008	0.793005	1.35863	0.565623	0.642434	24	NO CHANGE	NO CHANGE	UP
TC1000003050.mm.2	Xpot	1.3114e-05	0.341929	9.55875	9.80097	0.242222	0.0173876	0.557995	0.0946439	-0.463351	0.00179586	10.3959	12.3255	1.92958	0.633168	24	DOWN	NO CHANGE	UP
TC0900001400.mm.2	Rhoa	1.33378e-05	0.10714	11.7987	11.9413	0.14252	0.0185914	0.211947	0.124554	-0.0873926	0.292121	9.29364	6.30913	-2.98451	0.161341	24	NO CHANGE	NO CHANGE	UP
TC1300002463.mm.2	Iqgap2	1.33683e-05	3.18805e-05	14.7404	14.4782	-0.262202	2.04326e-08	0.188858	0.221786	0.0329278	0.539131	12.798	13.9964	1.1985	0.241087	24	NO CHANGE	NO CHANGE	DOWN
TC0400000349.mm.2	Dnaja1; Mir207	1.33756e-05	0.0332182	16.5025	17.271	0.768512	3.71569e-10	0.595533	0.177464	-0.418069	0.00282347	16.0829	14.7572	-1.32564	0.543679	24	DOWN	NO CHANGE	UP
TC0400002549.mm.2	Gne	1.34452e-05	0.00057432	15.7229	16.2903	0.567381	5.14508e-05	0.657505	0.560372	-0.097133	0.590847	9.40646	9.05068	-0.355783	0.750742	24	NO CHANGE	NO CHANGE	UP
TC1500001051.mm.2	Dazap2	1.36014e-05	0.00256671	12.1979	12.1745	-0.0234127	0.700256	0.312224	0.221941	-0.0902836	0.293178	3.66824	5.71643	2.04819	0.12065	24	NO CHANGE	NO CHANGE	NO CHANGE
TC1700000047.mm.2	Synj2	1.36435e-05	1.12205e-05	5.15	5.81357	0.663571	0.000107691	0.688861	1.09034	0.401483	0.0770995	9.40129	10.5786	1.17736	0.247722	24	NO CHANGE	NO CHANGE	UP
TC0300000161.mm.2	Tnfsf10	1.40794e-05	0.0212513	7.49667	8.04609	0.549425	0.00161484	0.555976	0.532484	-0.0234912	0.91946	16.1203	19.5916	3.47134	0.0370837	24	NO CHANGE	DELAY	UP
TC1000001577.mm.2	Sdr9c7	1.4136e-05	0.0015703	12.3133	9.45873	-2.8546	7.73225e-19	0.757878	0.818001	0.060123	0.817308	21.4636	18.8217	-2.64186	0.0418978	24	NO CHANGE	ADVANCE	DOWN
TC0400003653.mm.2	Epb41	1.43353e-05	2.4335e-05	10.9712	11.8153	0.844048	3.22099e-11	0.544584	0.504227	-0.0403565	0.765512	10.0051	10.967	0.961971	0.322986	24	NO CHANGE	NO CHANGE	UP
TC0300000786.mm.2	Crtc2	1.4385e-05	0.0163888	10.625	10.5461	-0.0788691	0.511975	0.578443	0.347289	-0.231154	0.174476	5.02192	5.57275	0.550828	0.725047	24	NO CHANGE	NO CHANGE	NO CHANGE
TC0200001535.mm.2	Abtb2	1.461e-05	0.0103534	6.58125	7.03488	0.453631	0.00865585	0.887332	0.492578	-0.394754	0.100457	20.6816	20.8991	0.217524	0.881176	24	NO CHANGE	NO CHANGE	UP
TC0400003747.mm.2	Tmem57	1.47512e-05	0.00037638	8.77417	8.77093	-0.00323413	0.977734	0.751761	0.373402	-0.378359	0.0237194	14.723	15.3986	0.675537	0.618865	24	DOWN	NO CHANGE	NO CHANGE
TC0100002739.mm.2	Ncl	1.50124e-05	0.00176482	11.4067	11.0646	-0.342044	0.000283033	0.362547	0.375331	0.0127838	0.916733	13.9392	13.4331	-0.506052	0.691136	24	NO CHANGE	NO CHANGE	DOWN
TC0800000854.mm.2	Nr3c2	1.51568e-05	0.0961895	9.02917	8.91018	-0.118988	0.376796	0.700931	0.246347	-0.454585	0.0203659	8.65487	12.9626	4.30774	0.0578668	24	DOWN	NO CHANGE	NO CHANGE
TC0300000307.mm.2	Hspa4l	1.52859e-05	0.000329651	9.68042	10.7967	1.11633	4.73586e-07	1.15283	0.703281	-0.44955	0.0966986	17.7751	19.0609	1.28579	0.288169	24	NO CHANGE	NO CHANGE	UP
TC0400002437.mm.2	Ndufb6	1.54871e-05	0.237726	11.8058	11.7566	-0.0492063	0.588254	0.456851	0.117315	-0.339537	0.0102782	17.8914	15.0935	-2.79783	0.375065	24	DOWN	NO CHANGE	NO CHANGE
TC0100000711.mm.2	Agfg1	1.57016e-05	0.0146105	10.0983	10.3275	0.229167	0.00187312	0.29686	0.222542	-0.0743174	0.451629	8.15552	7.52679	-0.628727	0.672672	24	NO CHANGE	NO CHANGE	UP
TC1100001345.mm.2	Mtmr4	1.57042e-05	1.44456e-05	10.5008	10.5345	0.0336508	0.750113	0.721467	0.389188	-0.332279	0.0307685	19.2406	19.1118	-0.128736	0.913406	24	DOWN	NO CHANGE	NO CHANGE
TC0100003402.mm.2	Fmo2	1.60738e-05	0.000140395	9.43625	9.60248	0.16623	0.243895	0.59443	0.784695	0.190265	0.3403	13.768	14.4859	0.717956	0.531108	24	NO CHANGE	NO CHANGE	NO CHANGE
TC0900001377.mm.2	Ifrd2	1.61204e-05	3.81527e-09	9.6475	9.51067	-0.136825	0.0702126	0.436966	0.653776	0.21681	0.0412837	15.4407	15.5639	0.123139	0.874669	24	UP	NO CHANGE	NO CHANGE
TC0500002642.mm.2	Ppat	1.61396e-05	3.24843e-07	7.42667	6.79732	-0.629345	5.44763e-07	0.620723	0.748569	0.127846	0.400424	12.9614	12.6011	-0.360238	0.672089	24	NO CHANGE	NO CHANGE	DOWN
TC1900000432.mm.2	Rcl1	1.64341e-05	0.00196241	11.8821	12.3356	0.453492	0.0002068	0.510156	0.458871	-0.0512854	0.745899	7.21454	6.74127	-0.473277	0.70696	24	NO CHANGE	NO CHANGE	UP
TC1100003369.mm.2	Rffl	1.64565e-05	0.00409161	9.8175	10.0983	0.280774	0.00267778	0.36946	0.352285	-0.0171752	0.891912	6.90376	9.53719	2.63343	0.0495032	24	NO CHANGE	DELAY	UP
TC1000002330.mm.2	1700040L02Rik	1.65193e-05	0.757036	7.19333	7.47466	0.281329	0.0872389	1.00475	0.0430553	-0.961694	0.000145524	8.16003	10.4492	2.28918	0.871831	24	DOWN	NO CHANGE	NO CHANGE
TC0100001016.mm.2	Zcchc2	1.65407e-05	0.325794	9.02708	8.68585	-0.34123	0.000187648	0.414262	0.0934696	-0.320793	0.00980666	4.59793	23.6753	-4.92265	0.163511	24	DOWN	NO CHANGE	DOWN
TC1300002360.mm.2	Polr3g	1.66664e-05	0.0896096	6.125	6.02593	-0.0990675	0.410462	0.526372	0.245925	-0.280447	0.0998938	16.8351	16.5682	-0.266897	0.899211	24	NO CHANGE	NO CHANGE	NO CHANGE
TC0900001399.mm.2	Amt	1.71756e-05	4.17462e-07	10.8704	10.9296	0.0591468	0.621663	0.734587	0.731189	-0.00339794	0.983815	1.29425	3.05013	1.75589	0.054159	24	NO CHANGE	NO CHANGE	NO CHANGE
TC0900003119.mm.2	Tmie	1.72408e-05	0.000126189	7.17917	6.50212	-0.677044	0.000208173	0.795548	0.909517	0.113969	0.634435	21.5659	21.8514	0.285519	0.78674	24	NO CHANGE	NO CHANGE	DOWN
TC0900001403.mm.2	Usp4	1.73267e-05	0.005424	10.6037	11.0366	0.432837	3.14972e-09	0.256922	0.213863	-0.0430587	0.602377	9.44006	8.12051	-1.31956	0.327526	24	NO CHANGE	NO CHANGE	UP
TC1300001509.mm.2	Yae1d1	1.74288e-05	0.0145738	8.41583	8.40385	-0.0119841	0.886838	0.395949	0.250026	-0.145923	0.220639	16.185	17.3825	1.19754	0.440757	24	NO CHANGE	NO CHANGE	NO CHANGE
TC1100000902.mm.2	Aloxe3	1.75026e-05	0.402799	3.87917	3.97649	0.0973214	0.301612	0.378619	0.0975378	-0.281081	0.0387661	0.607876	7.10127	6.49339	0.0946979	24	DOWN	NO CHANGE	NO CHANGE
TC0300002311.mm.2	Slc25a44	1.75239e-05	0.000192061	9.82417	10.5872	0.762996	3.19954e-07	0.50872	0.69665	0.187929	0.293863	14.725	18.6448	3.9198	0.00163258	24	NO CHANGE	DELAY	UP
TC0900000922.mm.2	Bnip2	1.76195e-05	0.0111441	10.5446	10.3756	-0.169028	0.0913752	0.417333	0.320662	-0.0966702	0.483334	15.2788	15.8544	0.575598	0.702096	24	NO CHANGE	NO CHANGE	NO CHANGE
TC1300001604.mm.2	Vmn1r210	1.7699e-05	0.0118734	4.01208	4.02992	0.0178373	0.888858	0.674542	0.367728	-0.306814	0.0962637	23.5103	0.204341	0.694089	0.645842	24	NO CHANGE	NO CHANGE	NO CHANGE
TC0900001236.mm.2	Copb2	1.78154e-05	0.327585	12.7037	12.6807	-0.0230556	0.692115	0.274683	0.0669268	-0.207756	0.0158461	6.73719	8.87154	2.13435	0.529927	24	DOWN	NO CHANGE	NO CHANGE
TC1900000250.mm.2	Glyat	1.8196e-05	0.320691	17.0921	16.0803	-1.01183	1.45218e-14	0.257578	0.12031	-0.137268	0.275362	14.3214	8.76417	-5.55728	0.0734092	24	NO CHANGE	NO CHANGE	DOWN
TC0X00000897.mm.2	Apoo; Apoo-ps	1.83288e-05	0.36043	11.5354	11.859	0.323611	0.000142029	0.354361	0.0835259	-0.270835	0.0173477	16.0314	12.7803	-3.25115	0.378552	24	DOWN	NO CHANGE	UP
TC1100000625.mm.2	Fnip1	1.83663e-05	0.00708784	8.47875	8.36117	-0.117579	0.445071	0.756689	0.51308	-0.243609	0.270595	7.8822	10.0161	2.13392	0.123112	24	NO CHANGE	NO CHANGE	NO CHANGE
TC1700000535.mm.2	Pde9a	1.83907e-05	0.00156984	9.14958	9.13895	-0.0106349	0.948374	0.910875	0.599912	-0.310963	0.190235	21.4442	22.4467	1.00253	0.419975	24	NO CHANGE	NO CHANGE	NO CHANGE
TC1700000143.mm.2	Tcp1	1.86489e-05	0.0034538	10.0196	10.2619	0.242321	0.0138031	0.480123	0.330011	-0.150113	0.262591	14.2413	17.5947	3.35341	0.0165757	24	NO CHANGE	DELAY	UP
TC0900001349.mm.2	Pcbp4	1.88169e-05	0.0149109	7.73292	6.99313	-0.739782	3.93631e-07	0.665476	0.3385	-0.326976	0.0696603	7.38025	9.77184	2.39159	0.127037	24	NO CHANGE	NO CHANGE	DOWN
TC0200000033.mm.2	Bend7	1.88606e-05	0.000459245	7.00542	6.76609	-0.239325	0.0380894	0.560941	0.51611	-0.0448309	0.779929	8.99578	8.77747	-0.218312	0.845435	24	NO CHANGE	NO CHANGE	DOWN
TC0100000633.mm.2	Ctdsp1	1.88783e-05	0.00117923	14.1529	13.4337	-0.719246	6.28143e-09	0.447521	0.436791	-0.0107297	0.939349	5.96304	7.95332	1.99028	0.104223	24	NO CHANGE	NO CHANGE	DOWN
TC0200001927.mm.2	Bcl2l11	1.8903e-05	0.0107929	4.26458	4.58593	0.321349	0.00641147	0.488395	0.374959	-0.113437	0.478925	8.77103	12.3964	3.62541	0.0154289	24	NO CHANGE	DELAY	UP
TC1300002116.mm.2	Agtpbp1; A230056J06Rik	1.89615e-05	0.0570822	7.35583	7.47815	0.122321	0.369096	0.68766	0.285674	-0.401986	0.0391212	18.7218	14.8818	-3.84004	0.0615572	24	DOWN	NO CHANGE	NO CHANGE
TC1100003687.mm.2	Med24	1.90984e-05	0.00140461	7.7525	8.51188	0.759385	4.38683e-09	0.453185	0.441129	-0.0120559	0.933708	0.806701	2.07172	1.26501	0.316226	24	NO CHANGE	NO CHANGE	UP
TC1400000575.mm.2	Pnp2	1.91201e-05	0.00564313	10.3321	11.0676	0.735536	1.21083e-07	0.619891	0.364917	-0.254974	0.125619	23.3108	0.73604	1.42529	0.315628	24	NO CHANGE	NO CHANGE	UP
TC0700002053.mm.2	Pnpla2	1.92253e-05	0.00111264	11.3854	12.2806	0.895198	6.79879e-07	0.837889	0.59254	-0.245349	0.267705	7.8404	9.42561	1.58521	0.191083	24	NO CHANGE	NO CHANGE	UP
TC0300000641.mm.2	Fga	1.92681e-05	0.000947436	18.5971	18.4074	-0.189663	0.00284511	0.271341	0.262067	-0.00927423	0.912117	3.72408	3.69835	-0.0257333	0.983348	24	NO CHANGE	NO CHANGE	DOWN
TC0500001663.mm.2	Fam20c	1.96566e-05	0.00247726	8.65708	8.14456	-0.51252	2.76638e-05	0.426547	0.456658	0.0301106	0.844151	13.7219	14.7654	1.04358	0.441121	24	NO CHANGE	NO CHANGE	DOWN
TC0300000491.mm.2	P2ry1	1.98147e-05	0.0263604	6.79917	5.71185	-1.08732	4.63968e-12	0.552066	0.300999	-0.251067	0.124888	13.1593	12.7257	-0.433614	0.792955	24	NO CHANGE	NO CHANGE	DOWN
TC1000000903.mm.2	Aes	1.9918e-05	0.24179	16.4937	16.2271	-0.266687	3.48279e-05	0.249867	0.0837129	-0.166154	0.0494708	21.2449	21.3381	0.0932188	0.972965	24	DOWN	NO CHANGE	DOWN
TC0400004127.mm.2	Fam213b	2.01384e-05	0.0245635	7.16917	6.20349	-0.965675	2.86635e-08	0.694196	0.373117	-0.321079	0.113601	19.6556	17.8106	-1.84499	0.275945	24	NO CHANGE	NO CHANGE	DOWN
TC0X00001071.mm.2	Pgk1	2.01464e-05	0.0571793	13.6204	14.1437	0.523234	3.91283e-11	0.323272	0.118923	-0.204349	0.018881	18.1791	23.9363	5.75713	0.00647613	24	DOWN	NO CHANGE	UP
TC0700002931.mm.2	9830147E19Rik	2.02214e-05	0.302448	7.83708	7.70274	-0.134345	0.245589	0.560485	0.132257	-0.428228	0.0111205	12.8155	13.2569	0.441412	0.898205	24	DOWN	NO CHANGE	NO CHANGE
TC0400002790.mm.2	Hdhd3	2.10367e-05	0.694391	6.45	6.18077	-0.269226	0.0984252	0.653931	0.0753287	-0.578602	0.0129494	16.444	15.3785	-1.06545	0.89958	24	DOWN	NO CHANGE	NO CHANGE
TC1000000246.mm.2	Ptprk	2.11798e-05	0.033779	13.4242	13.4358	0.0115873	0.896814	0.464437	0.206212	-0.258225	0.0440084	3.24461	4.89085	1.64624	0.377281	24	DOWN	NO CHANGE	NO CHANGE
TC1500001870.mm.2	Tmem184b	2.12183e-05	0.0940789	10.0213	9.93419	-0.0870635	0.447122	0.52327	0.232354	-0.290916	0.0798826	8.20693	11.0452	2.83823	0.16797	24	NO CHANGE	NO CHANGE	NO CHANGE
TC0900003204.mm.2	Rbms3	2.13246e-05	0.199359	7.37875	7.59022	0.211468	0.0853785	0.400066	0.204899	-0.195167	0.254607	4.13529	6.27572	2.14043	0.405476	24	NO CHANGE	NO CHANGE	NO CHANGE
TC1900000705.mm.2	Sfxn2	2.17921e-05	0.00100349	8.85042	8.87343	0.0230159	0.831638	0.459973	0.48507	0.0250971	0.868768	18.3963	17.6143	-0.781998	0.53153	24	NO CHANGE	NO CHANGE	NO CHANGE
TC1900000249.mm.2	Gm4952	2.18485e-05	0.000403531	12.9954	9.8428	-3.15262	6.2948e-15	1.12127	1.31003	0.188758	0.612439	2.182	5.11091	2.92891	0.0182788	24	NO CHANGE	DELAY	DOWN
TC1000002436.mm.2	Lrrc3	2.19339e-05	2.69005e-05	8.25	7.16506	-1.08494	1.08231e-10	0.545081	0.79613	0.251049	0.16408	17.457	17.2018	-0.25527	0.813675	24	NO CHANGE	NO CHANGE	DOWN
TC1100001580.mm.2	Thra	2.19473e-05	0.00772914	7.3575	6.90036	-0.457143	9.09834e-06	0.485115	0.271571	-0.213544	0.103064	22.6394	0.435458	1.79604	0.224458	24	NO CHANGE	NO CHANGE	DOWN
TC1400001039.mm.2	Gm21750	2.23887e-05	0.650368	6.77917	7.42724	0.648075	0.000199403	0.651943	0.0873417	-0.564601	0.0152843	4.27612	5.98797	1.71185	0.81216	24	DOWN	NO CHANGE	UP
TC1400001676.mm.2	Sh3bp5	2.23953e-05	0.021879	9.36125	9.80976	0.448512	3.43853e-07	0.39277	0.190938	-0.201832	0.0628392	19.0083	22.9929	3.98457	0.0187854	24	NO CHANGE	DELAY	UP
TC0700000439.mm.2	Cyp2a4	2.27447e-05	0.0138426	13.6375	15.4791	1.84159	2.00017e-08	1.31691	0.792604	-0.524311	0.174644	14.1822	9.75638	-4.42581	0.00457602	24	NO CHANGE	ADVANCE	UP
TC0700003988.mm.2	Rrp8	2.31741e-05	1.21842e-05	7.765	7.74016	-0.0248413	0.83541	0.710094	0.582	-0.128094	0.445473	14.0621	15.0967	1.03462	0.317702	24	NO CHANGE	NO CHANGE	NO CHANGE
TC0500000052.mm.2	Abcb1b	2.35067e-05	0.00283955	5.10083	5.69339	0.59256	4.92666e-05	0.597938	0.51642	-0.0815172	0.664091	10.6065	11.4032	0.796723	0.532746	24	NO CHANGE	NO CHANGE	UP
TC0400002980.mm.2	Plin2	2.36183e-05	0.0457734	14.8983	15.0574	0.159048	0.415077	0.577489	0.540621	-0.0368678	0.892783	0.639617	6.16468	5.52506	0.00540659	24	NO CHANGE	DELAY	NO CHANGE
TC0300000640.mm.2	Fgg	2.3848e-05	0.00467252	19.2679	19.1547	-0.113254	0.00136598	0.123502	0.128374	0.00487213	0.916313	3.56088	4.38023	0.819355	0.569647	24	NO CHANGE	NO CHANGE	DOWN
TC0300001149.mm.2	Taf13	2.39583e-05	0.0326908	5.95	5.69464	-0.255357	0.0146514	0.487439	0.249112	-0.238327	0.0982112	17.785	14.0237	-3.76127	0.0378752	24	NO CHANGE	ADVANCE	DOWN
TC0100001207.mm.2	Etnk2	2.41372e-05	0.000633942	13.6346	12.8432	-0.791429	6.59087e-09	0.536464	0.466481	-0.0699828	0.647819	13.8921	15.1123	1.22023	0.31317	24	NO CHANGE	NO CHANGE	DOWN
TC1700000573.mm.2	Zfp563	2.41564e-05	0.0390666	6.34167	5.9844	-0.357262	0.00113931	0.455262	0.263629	-0.191632	0.193706	16.1959	12.2633	-3.9326	0.0264755	24	NO CHANGE	ADVANCE	DOWN
TC1600001667.mm.2	Phldb2	2.42566e-05	0.00107222	11.2517	10.9421	-0.309583	0.0010694	0.483029	0.334989	-0.148041	0.245817	7.88466	10.5034	2.61877	0.035806	24	NO CHANGE	DELAY	DOWN
TC0300002813.mm.2	Agl	2.43349e-05	0.022364	11.5888	11.3842	-0.204524	0.0314475	0.438941	0.25738	-0.181561	0.173998	10.2011	10.7219	0.520826	0.740656	24	NO CHANGE	NO CHANGE	DOWN
TC0400001934.mm.2	Srm	2.47595e-05	0.00525132	10.2929	10.3958	0.102917	0.662542	1.18865	0.757749	-0.430901	0.1954	15.2221	16.5268	1.3047	0.366376	24	NO CHANGE	NO CHANGE	NO CHANGE
TC0500000896.mm.2	Ccng2	2.47951e-05	0.000416809	9.86542	10.2067	0.34125	0.167767	1.29901	1.01005	-0.288954	0.400344	0.686129	3.18711	2.50098	0.0405776	24	NO CHANGE	DELAY	NO CHANGE
TC1300002036.mm.2	Nop16	2.48055e-05	0.000218713	10.9454	10.1703	-0.775159	1.2233e-10	0.565421	0.318683	-0.246737	0.0602824	17.9854	18.0919	0.106483	0.933409	24	NO CHANGE	NO CHANGE	DOWN
TC1100000994.mm.2	Ggt6	2.50789e-05	1.88769e-05	7.90708	6.77764	-1.12944	1.77793e-10	0.636577	0.844602	0.208025	0.283068	19.5162	20.4464	0.930182	0.35724	24	NO CHANGE	NO CHANGE	DOWN
TC1000002496.mm.2	Pcsk4	2.52623e-05	0.045485	5.69708	5.21935	-0.477738	0.000349589	0.620676	0.273987	-0.346689	0.0510773	10.2266	6.29792	-3.92873	0.0443923	24	NO CHANGE	ADVANCE	DOWN
TC0100003639.mm.2	Adss	2.5411e-05	0.533724	11.1825	10.7148	-0.467659	4.20557e-08	0.261989	0.0546338	-0.207355	0.040745	16.0425	1.66561	9.62308	0.0645434	24	DOWN	NO CHANGE	DOWN
TC1300000258.mm.2	Hist1h1c	2.54719e-05	0.000321126	8.21542	8.78498	0.569563	0.0240961	1.41057	0.928542	-0.482026	0.163822	18.364	16.5139	-1.85017	0.137535	24	NO CHANGE	NO CHANGE	UP
TC0600002484.mm.2	Usp39	2.55383e-05	0.00055651	10.2958	10.1797	-0.116131	0.185851	0.470824	0.339937	-0.130887	0.285105	16.4915	17.0603	0.568771	0.642429	24	NO CHANGE	NO CHANGE	NO CHANGE
TC1700001299.mm.2	Epas1	2.5963e-05	0.00172554	11.0192	10.4176	-0.601587	2.75902e-08	0.416874	0.358605	-0.0582695	0.644334	8.1795	11.6497	3.47023	0.00720336	24	NO CHANGE	DELAY	DOWN
TC1300001784.mm.2	Slc22a23	2.61705e-05	0.00934407	10.7283	10.4294	-0.298889	0.00138552	0.360879	0.306149	-0.0547305	0.662244	10.0611	8.86693	-1.19419	0.40262	24	NO CHANGE	NO CHANGE	DOWN
TC0500002688.mm.2	Ugt2b34	2.63126e-05	0.00595395	16.3175	16.336	0.0184524	0.73606	0.334767	0.131258	-0.203509	0.0107163	15.6572	15.0264	-0.63085	0.719319	24	DOWN	NO CHANGE	NO CHANGE
TC0200002721.mm.2	Gm14436; Gm8923	2.64335e-05	0.000529726	14.5646	14.0631	-0.501468	2.52915e-05	0.642299	0.350022	-0.292277	0.0545437	15.995	16.018	0.0229236	0.986481	24	NO CHANGE	NO CHANGE	DOWN
TC0100000817.mm.2	Neu2	2.67839e-05	0.0220078	6.55583	6.49377	-0.0620635	0.596752	0.49715	0.348028	-0.149122	0.375006	17.0704	21.0231	3.95265	0.014264	24	NO CHANGE	DELAY	NO CHANGE
TC0400003330.mm.2	Uqcrh	2.69646e-05	0.0158575	14.8975	15.1326	0.235079	4.38045e-05	0.258398	0.140318	-0.11808	0.107989	18.9265	16.254	-2.67248	0.10884	24	NO CHANGE	NO CHANGE	UP
TC0100001351.mm.2	Ivns1abp	2.74295e-05	0.000168383	12.4008	12.0735	-0.327361	0.0011317	0.549379	0.37034	-0.179039	0.179557	14.85	14.5177	-0.332305	0.779866	24	NO CHANGE	NO CHANGE	DOWN
TC1600002168.mm.2	Vasn	2.74715e-05	0.0151861	6.25958	6.05599	-0.203591	0.0282646	0.438571	0.251157	-0.187414	0.141858	0.421814	15.9668	-8.45501	4.73593e-06	24	NO CHANGE	ADVANCE	DOWN
TC0300000550.mm.2	Gfm1	2.75347e-05	0.108603	13.0113	13.2039	0.192639	0.000742566	0.275004	0.0918937	-0.18311	0.0192445	18.02	0.0114766	5.99143	0.0132138	24	DOWN	NO CHANGE	UP
TC1400000502.mm.2	Cgrrf1	2.75653e-05	0.0119203	11.1892	11.6107	0.421508	1.18274e-07	0.338475	0.184937	-0.153538	0.103294	15.0982	15.4928	0.394562	0.80492	24	NO CHANGE	NO CHANGE	UP
TC0900002604.mm.2	Aqp9	2.75663e-05	7.98871e-07	16.3221	15.3277	-0.994345	5.57952e-13	0.461037	0.75303	0.291993	0.0389585	7.20371	7.99879	0.795076	0.396049	24	UP	NO CHANGE	DOWN
TC0400001970.mm.2	Slc2a5	2.76498e-05	0.00486804	8.22792	5.6052	-2.62272	1.00345e-17	1.02746	0.538566	-0.48889	0.0657427	10.2148	10.9939	0.779175	0.59038	24	NO CHANGE	NO CHANGE	DOWN
TC0100000395.mm.2	Hspe1	2.77098e-05	0.00414291	10.7917	10.8166	0.0249405	0.771898	0.4098	0.309189	-0.100611	0.414186	18.3233	20.719	2.39573	0.0750251	24	NO CHANGE	NO CHANGE	NO CHANGE
TC1100002157.mm.2	Gck	2.82639e-05	0.0335114	10.0512	10.1668	0.115595	0.651255	1.35226	0.575337	-0.776922	0.0359125	16.1648	13.3958	-2.769	0.14288	24	DOWN	NO CHANGE	NO CHANGE
TC0500002754.mm.2	Sdad1	2.83294e-05	0.0682023	7.92625	7.7922	-0.134048	0.183324	0.454194	0.218465	-0.235729	0.101892	13.507	11.9948	-1.51222	0.434804	24	NO CHANGE	NO CHANGE	NO CHANGE
TC1800001595.mm.2	Lipg	2.84335e-05	5.51461e-06	7.36292	8.74044	1.37752	2.35334e-10	1.00334	0.82579	-0.177552	0.451892	12.7148	13.0903	0.375468	0.707487	24	NO CHANGE	NO CHANGE	UP
TC0400001164.mm.2	Eps15	2.84707e-05	0.00394116	9.74958	9.55615	-0.193433	0.0082222	0.325737	0.258934	-0.0668032	0.506245	8.15151	9.78697	1.63546	0.214499	24	NO CHANGE	NO CHANGE	DOWN
TC0200002720.mm.2	Gm14431; Gm8898	2.85876e-05	0.0016009	14.6317	14.2718	-0.359861	0.00221566	0.652408	0.33671	-0.315698	0.0469571	16.0098	16.4723	0.462543	0.749898	24	DOWN	NO CHANGE	DOWN
TC0200005341.mm.2	Gm14431; Gm8898	2.85876e-05	0.0016009	14.6317	14.2718	-0.359861	0.00221565	0.652408	0.336712	-0.315696	0.0469587	16.0098	16.4723	0.462542	0.749896	24	DOWN	NO CHANGE	DOWN
TC0200002738.mm.2	Gm8898; Gm14431	2.85876e-05	0.00160092	14.6317	14.2718	-0.359861	0.00221565	0.652408	0.336712	-0.315696	0.0469587	16.0098	16.4723	0.462542	0.749897	24	DOWN	NO CHANGE	DOWN
TC0300000180.mm.2	Slc2a2	2.94937e-05	0.00390664	18.1062	17.1865	-0.919782	1.58287e-11	0.518382	0.338375	-0.180007	0.213554	11.6341	11.5404	-0.0937111	0.944517	24	NO CHANGE	NO CHANGE	DOWN
TC0300002815.mm.2	Palmd	2.97095e-05	0.00123919	12.6483	12.2867	-0.361647	0.00910177	0.545536	0.600539	0.0550031	0.77127	7.29287	8.07938	0.786512	0.529738	24	NO CHANGE	NO CHANGE	DOWN
TC0700004346.mm.2	Prss8	2.98137e-05	0.104816	5.845	4.52605	-1.31895	2.05116e-10	0.721356	0.295368	-0.425988	0.0599475	9.80502	15.8601	6.05511	0.0106515	24	NO CHANGE	NO CHANGE	DOWN
TC1800000924.mm.2	Crem	2.991e-05	0.0151396	10.3083	9.92206	-0.38627	0.000781346	0.597317	0.268455	-0.328862	0.0366643	0.306745	21.671	-2.63575	0.116014	24	DOWN	NO CHANGE	DOWN
TC1400000200.mm.2	Vdac2	3.00359e-05	0.0603059	14.5079	14.9343	0.426409	7.87466e-08	0.349083	0.13166	-0.217423	0.0251053	12.6367	9.49604	-3.14064	0.12503	24	DOWN	NO CHANGE	UP
TC1200000798.mm.2	Acot1	3.03294e-05	0.0309649	8.94417	5.95962	-2.98454	3.02447e-14	1.32036	0.640311	-0.680046	0.0743342	19.2146	13.0344	-6.18018	0.00106396	24	NO CHANGE	ADVANCE	DOWN
TC0900003249.mm.2	Gorasp1	3.04239e-05	0.0503691	6.64125	6.46073	-0.180516	0.0730707	0.480937	0.214647	-0.26629	0.0592473	14.1777	16.6597	2.4819	0.212863	24	NO CHANGE	NO CHANGE	NO CHANGE
TC0300000713.mm.2	Gpatch4	3.05443e-05	0.00403869	6.8425	6.96468	0.122183	0.320706	0.493403	0.467045	-0.0263578	0.87784	16.7368	17.4028	0.666059	0.632434	24	NO CHANGE	NO CHANGE	NO CHANGE
TC0500000699.mm.2	Rasl11b	3.15011e-05	0.00511133	4.41958	3.96577	-0.45381	0.000495845	0.635633	0.373354	-0.26228	0.129103	19.1492	18.7044	-0.444815	0.758165	24	NO CHANGE	NO CHANGE	DOWN
TC0700000488.mm.2	Dyrk1b	3.18557e-05	1.41327e-05	7.14458	7.69264	0.548056	0.000299624	0.796427	0.691819	-0.104608	0.593719	4.75632	5.52728	0.770964	0.456416	24	NO CHANGE	NO CHANGE	UP
TC1100003314.mm.2	Lgals9	3.21096e-05	0.000331009	16.1379	17.097	0.959107	9.42004e-13	0.483202	0.41492	-0.0682815	0.609678	4.33309	2.1671	-2.166	0.0683855	24	NO CHANGE	NO CHANGE	UP
TC1800000301.mm.2	Egr1	3.21892e-05	5.056e-05	6.8125	7.9031	1.0906	0.00154351	1.8017	1.4879	-0.3138	0.488949	3.74629	3.55955	-0.186742	0.86442	24	NO CHANGE	NO CHANGE	UP
TC0200002719.mm.2	Gm14288; Gm14440	3.21941e-05	0.000165667	14.5517	14.088	-0.46371	3.35956e-05	0.604056	0.358747	-0.245309	0.0854369	16.0132	15.9254	-0.0877555	0.944852	24	NO CHANGE	NO CHANGE	DOWN
TC0200002737.mm.2	Gm14288; Gm14435	3.21941e-05	0.000165667	14.5517	14.088	-0.46371	3.35956e-05	0.604056	0.358747	-0.245309	0.0854369	16.0132	15.9254	-0.0877481	0.944856	24	NO CHANGE	NO CHANGE	DOWN
TC1100000900.mm.2	Per1	3.21985e-05	1.18369e-06	5.99	5.66276	-0.327242	0.221525	1.35693	1.8502	0.493271	0.193667	11.2085	12.7951	1.58656	0.0908549	24	NO CHANGE	NO CHANGE	NO CHANGE
TC1600001006.mm.2	Ifngr2	3.24157e-05	0.0321707	9.57792	9.6623	0.0843849	0.429323	0.565715	0.242508	-0.323207	0.0380764	6.28288	11.3706	5.08768	0.0072207	24	DOWN	DELAY	NO CHANGE
TC1000002043.mm.2	Amd2; Amd1	3.25439e-05	7.01907e-07	10.62	10.1423	-0.477698	0.000447558	0.785943	0.643171	-0.142772	0.42338	13.4828	13.3824	-0.100458	0.917607	24	NO CHANGE	NO CHANGE	DOWN
TC0900001764.mm.2	Gm17571	3.25573e-05	0.00317756	15.2067	15.0511	-0.155556	0.247858	0.571975	0.506792	-0.0651822	0.727126	2.12533	3.58043	1.4551	0.289153	24	NO CHANGE	NO CHANGE	NO CHANGE
TC1900000797.mm.2	Casp7	3.26684e-05	0.016749	8.52792	8.53542	0.0075	0.946802	0.545546	0.319206	-0.226341	0.163994	13.5441	22.6508	9.1067	5.21379e-07	24	NO CHANGE	DELAY	NO CHANGE
TC1700002042.mm.2	Znrd1	3.27287e-05	0.000117913	9.62042	9.86546	0.24504	0.00944326	0.507648	0.385969	-0.121679	0.341497	17.5264	17.915	0.38861	0.732849	24	NO CHANGE	NO CHANGE	UP
TC1600001805.mm.2	Crybg3	3.30941e-05	0.00162485	7.56042	6.96369	-0.596726	7.08581e-05	0.650859	0.527469	-0.12339	0.519915	17.5884	18.266	0.67765	0.595961	24	NO CHANGE	NO CHANGE	DOWN
TC0800002060.mm.2	Lonrf1	3.32314e-05	0.000384772	6.71625	6.67911	-0.0371429	0.830526	1.04328	0.575072	-0.468208	0.0594542	12.9621	14.85	1.88791	0.164835	24	NO CHANGE	NO CHANGE	NO CHANGE
TC1000001704.mm.2	Tab2	3.35218e-05	0.00224968	9.88667	10.5914	0.704722	7.1988e-08	0.551182	0.379712	-0.17147	0.262513	2.62799	2.53657	-0.0914219	0.945735	24	NO CHANGE	NO CHANGE	UP
TC0300002491.mm.2	Car14	3.36244e-05	0.00165805	10.49	9.64823	-0.841766	5.34549e-06	0.672385	0.706002	0.033617	0.884524	20.4222	21.1696	0.747446	0.552941	24	NO CHANGE	NO CHANGE	DOWN
TC0400000698.mm.2	Slc31a1	3.37222e-05	0.0256438	13.6246	13.3459	-0.278671	1.74081e-05	0.311774	0.130097	-0.181677	0.0292599	15.9796	14.3648	-1.61477	0.390679	24	DOWN	NO CHANGE	DOWN
TC1100003269.mm.2	Taok1	3.37902e-05	0.0287575	9.76792	9.77028	0.00236111	0.976026	0.279296	0.232364	-0.0469322	0.673504	8.01709	7.22295	-0.794141	0.637085	24	NO CHANGE	NO CHANGE	NO CHANGE
TC0400001413.mm.2	Rragc	3.38034e-05	0.508972	11.7892	11.7755	-0.013631	0.833052	0.284121	0.0484272	-0.235694	0.0121446	9.59172	15.7886	6.19689	0.249977	24	DOWN	NO CHANGE	NO CHANGE
TC1900001506.mm.2	Pik3ap1	3.39675e-05	0.000111948	11.705	12.7001	0.995079	5.08852e-10	0.728706	0.497342	-0.231364	0.193961	6.17786	8.11781	1.93995	0.0962149	24	NO CHANGE	NO CHANGE	UP
TC1200000503.mm.2	Ctage5	3.41061e-05	5.38587e-06	15.5408	15.088	-0.452877	4.33805e-09	0.303014	0.402846	0.0998323	0.259167	11.3082	11.0748	-0.233386	0.807898	24	NO CHANGE	NO CHANGE	DOWN
TC0400002636.mm.2	Baat	3.41778e-05	0.394181	13.2596	13.4845	0.224901	0.00857739	0.355189	0.0807256	-0.274463	0.0209565	20.0986	17.6156	-2.48297	0.543263	24	DOWN	NO CHANGE	UP
TC1800000665.mm.2	Nedd4l	3.43002e-05	3.93423e-07	11.6267	11.2544	-0.372302	0.0130331	0.945373	0.64478	-0.300593	0.150391	22.251	22.4456	0.194693	0.8491	24	NO CHANGE	NO CHANGE	DOWN
TC0800001038.mm.2	Cyld	3.46379e-05	0.560089	7.86333	8.09657	0.233234	0.0278677	0.463686	0.0674674	-0.396219	0.00865702	8.15106	2.17324	-5.97782	0.324346	24	DOWN	NO CHANGE	UP
TC1300002274.mm.2	Papd7	3.49125e-05	0.0203694	7.13292	7.49909	0.366171	0.0100861	0.576762	0.391866	-0.184897	0.335819	13.4919	15.3042	1.81229	0.27264	24	NO CHANGE	NO CHANGE	UP
TC0500002059.mm.2	Pus7	3.51401e-05	0.114662	5.85	5.89379	0.0437897	0.793309	0.794891	0.292259	-0.502633	0.0368664	15.6572	17.5756	1.91842	0.421786	24	DOWN	NO CHANGE	NO CHANGE
TC0900002991.mm.2	Atp2c1	3.51996e-05	0.0733504	8.98	8.6697	-0.310298	0.00156258	0.3467	0.216532	-0.130168	0.324318	12.9698	11.6414	-1.3284	0.486891	24	NO CHANGE	NO CHANGE	DOWN
TC0600001238.mm.2	Thumpd3	3.52599e-05	0.164122	7.05542	6.9225	-0.132917	0.317403	0.498197	0.230452	-0.267745	0.154131	16.3134	14.2394	-2.07405	0.400941	24	NO CHANGE	NO CHANGE	NO CHANGE
TC0700000972.mm.2	E030018B13Rik	3.54199e-05	0.000358797	5.05792	7.21405	2.15613	5.8631e-10	0.855414	1.45972	0.604305	0.114627	16.1787	15.9034	-0.275258	0.843834	24	NO CHANGE	NO CHANGE	UP
TC0400001274.mm.2	Eif2b3	3.58763e-05	0.0490382	8.37708	8.50829	0.13121	0.323724	0.497952	0.332691	-0.165262	0.374313	13.6841	14.8429	1.15882	0.533564	24	NO CHANGE	NO CHANGE	NO CHANGE
TC0800000737.mm.2	Nr2c2ap	3.59552e-05	0.0341549	6.9025	6.58131	-0.32119	0.000203359	0.398594	0.182845	-0.215749	0.0584778	17.4867	18.2133	0.726664	0.69452	24	NO CHANGE	NO CHANGE	DOWN
TC0300002453.mm.2	Cgn	3.6305e-05	0.00551404	7.49292	6.58071	-0.912202	2.62107e-10	0.607917	0.319461	-0.288456	0.0717585	21.1263	0.440815	3.31452	0.0314058	24	NO CHANGE	DELAY	DOWN
TC0400004026.mm.2	Tardbp	3.63282e-05	0.00664463	10.3458	10.2279	-0.117956	0.0651322	0.306842	0.194335	-0.112507	0.203159	21.1208	15.8264	-5.29442	0.000901094	24	NO CHANGE	ADVANCE	NO CHANGE
TC0800002145.mm.2	Fam149a	3.78416e-05	0.00524613	9.7025	9.13766	-0.564841	3.87802e-07	0.4042	0.335714	-0.068486	0.605859	23.937	1.89011	1.95311	0.169353	24	NO CHANGE	NO CHANGE	DOWN
TC0400003773.mm.2	Pnrc2	3.79784e-05	0.000835007	10.2792	10.7302	0.451012	2.53418e-08	0.340846	0.262821	-0.0780241	0.410373	23.4848	22.9864	-0.498432	0.678391	24	NO CHANGE	NO CHANGE	UP
TC0X00002307.mm.2	Atp11c	3.88896e-05	0.000165153	14.1454	13.9007	-0.244683	3.81857e-05	0.293694	0.226877	-0.0668173	0.380386	6.99682	7.88941	0.892596	0.431526	24	NO CHANGE	NO CHANGE	DOWN
TC1200000788.mm.2	Rbm25	3.8967e-05	0.000130533	10.32	9.87242	-0.447579	0.000114979	0.545191	0.49357	-0.0516207	0.729718	13.8988	13.0509	-0.847974	0.444105	24	NO CHANGE	NO CHANGE	DOWN
TC1100001587.mm.2	Rara	3.89931e-05	0.0572592	7.81792	7.46558	-0.352341	0.000324885	0.380959	0.206488	-0.174471	0.171999	7.2601	16.3377	9.07765	2.98686e-05	24	NO CHANGE	NO CHANGE	DOWN
TC0800000449.mm.2	6430573F11Rik	3.94481e-05	0.715735	5.14417	4.34282	-0.801349	1.84586e-06	0.767249	0.0521335	-0.715116	0.00118339	22.6353	8.00727	9.37199	0.381313	24	DOWN	NO CHANGE	DOWN
TC1500002142.mm.2	Slc38a2	3.96518e-05	0.000323009	13.8892	14.6838	0.794603	3.84974e-05	0.87102	0.777917	-0.093103	0.706918	6.89756	8.85611	1.95855	0.0886943	24	NO CHANGE	NO CHANGE	UP
TC1800001227.mm.2	Pcdh1	3.97385e-05	0.0416461	10.8021	10.0571	-0.74496	1.17424e-07	0.655938	0.221566	-0.434372	0.0110012	3.56474	5.15843	1.59369	0.467668	24	DOWN	NO CHANGE	DOWN
TC1400001436.mm.2	Pdhb	4.04102e-05	0.732955	13.9821	14.7835	0.801448	1.3804e-09	0.422338	0.0418663	-0.380472	0.012182	12.4002	18.0316	5.63138	0.563456	24	DOWN	NO CHANGE	UP
TC0300002488.mm.2	Mrps21	4.05483e-05	0.0417295	10.6817	10.8168	0.135179	0.194276	0.483857	0.239513	-0.244344	0.0976088	17.1556	18.1431	0.98743	0.596446	24	NO CHANGE	NO CHANGE	NO CHANGE
TC0700002974.mm.2	Atf5	4.07435e-05	0.00548362	9.32625	11.13	1.80371	3.91298e-13	1.03826	0.41629	-0.621968	0.0145268	2.99354	1.1934	-1.80014	0.302309	24	DOWN	NO CHANGE	UP
TC0600001203.mm.2	Bhlhe40	4.09321e-05	0.0298136	13.4696	14.5338	1.06421	5.17508e-06	1.07449	0.452066	-0.62242	0.0343457	12.3084	17.0014	4.69295	0.0182326	24	DOWN	DELAY	UP
TC0200003362.mm.2	Stom	4.10338e-05	0.034813	10.9854	10.0322	-0.953254	8.9394e-10	0.492084	0.324871	-0.167213	0.333046	4.54195	7.17954	2.63759	0.129314	24	NO CHANGE	NO CHANGE	DOWN
TC1100002015.mm.2	Baiap2	4.22624e-05	0.0319039	8.45917	9.94758	1.48841	2.72621e-12	0.822579	0.322386	-0.500193	0.0235441	18.9135	15.337	-3.57648	0.0792651	24	DOWN	NO CHANGE	UP
TC1100000205.mm.2	Peli1	4.23549e-05	0.00706037	8.9925	8.9427	-0.0498016	0.54886	0.351812	0.291549	-0.0602628	0.611146	2.10971	8.82817	6.71846	1.89355e-05	24	NO CHANGE	DELAY	NO CHANGE
TC0400003814.mm.2	Alpl	4.28275e-05	0.000891954	6.49292	6.08472	-0.408194	0.0248644	0.887716	0.678375	-0.209341	0.397979	15.4875	16.5572	1.06972	0.401961	24	NO CHANGE	NO CHANGE	DOWN
TC0200005378.mm.2	Gm14326	4.28672e-05	0.00439237	14.0538	13.8762	-0.177579	0.0532163	0.425476	0.300302	-0.125174	0.321358	15.6441	16.2791	0.634993	0.656045	24	NO CHANGE	NO CHANGE	NO CHANGE
TC1300000102.mm.2	AW209491	4.29343e-05	0.135683	8.05583	7.99153	-0.0643056	0.598814	0.569507	0.201454	-0.368053	0.036331	15.9301	17.46	1.52985	0.543464	24	DOWN	NO CHANGE	NO CHANGE
TC0800001867.mm.2	Slc25a15	4.30145e-05	0.000506445	13.9775	14.58	0.6025	8.15708e-10	0.383245	0.326815	-0.05643	0.605867	21.2691	22.7814	1.51238	0.197295	24	NO CHANGE	NO CHANGE	UP
TC1400002310.mm.2	Slc25a37	4.33767e-05	0.000740637	8.5175	7.4074	-1.1101	2.10964e-13	0.512786	0.440682	-0.0721048	0.630582	12.6267	10.2441	-2.38253	0.0491594	24	NO CHANGE	ADVANCE	DOWN
TC0600002240.mm.2	Tra2a	4.34469e-05	0.00174993	9.18625	9.10081	-0.0854365	0.562099	0.804512	0.48191	-0.322602	0.126264	20.5059	18.9771	-1.52887	0.266868	24	NO CHANGE	NO CHANGE	NO CHANGE
TC0200000503.mm.2	Med27	4.35423e-05	0.0377091	8.2375	8.58938	0.351885	0.000666992	0.454442	0.230725	-0.223717	0.107153	16.4141	19.8725	3.45846	0.0577812	24	NO CHANGE	NO CHANGE	UP
TC0200004932.mm.2	Commd7	4.35996e-05	0.00343761	9.44792	8.90718	-0.540734	1.52907e-06	0.514721	0.303576	-0.211146	0.128426	0.580445	1.16487	0.584425	0.682156	24	NO CHANGE	NO CHANGE	DOWN
TC1300002013.mm.2	Nfil3	4.38667e-05	5.63876e-06	7.96042	6.5279	-1.43252	2.01245e-09	1.09657	0.951156	-0.14541	0.58943	21.1509	20.8949	-0.255944	0.796446	24	NO CHANGE	NO CHANGE	DOWN
TC1000002239.mm.2	Sgpl1	4.39288e-05	0.175143	7.56833	7.46065	-0.107679	0.294407	0.476622	0.150914	-0.325708	0.0267039	22.2199	4.12507	5.90516	0.0392465	24	DOWN	NO CHANGE	NO CHANGE
TC0200003656.mm.2	Cobll1	4.40792e-05	0.00697085	5.48042	5.26056	-0.219861	0.0163732	0.489573	0.240219	-0.249354	0.053344	7.61901	8.73779	1.11878	0.472676	24	NO CHANGE	NO CHANGE	DOWN
TC0300001409.mm.2	Adh1	4.44162e-05	0.125044	19.2129	19.2126	-0.000317461	0.991008	0.13412	0.0476218	-0.0864982	0.0343553	16.8739	13.3742	-3.49962	0.154854	24	DOWN	NO CHANGE	NO CHANGE
TC0500001408.mm.2	Tmem120b	4.46798e-05	0.000135077	7.56042	8.19633	0.635913	2.38018e-05	0.707667	0.588731	-0.118936	0.527269	11.8695	16.166	4.29645	0.000537891	24	NO CHANGE	DELAY	UP
TC0200003701.mm.2	Fastkd1	4.48072e-05	0.11088	8.38875	8.40359	0.0148413	0.894716	0.413557	0.224684	-0.188873	0.232979	13.3232	15.0132	1.69	0.447419	24	NO CHANGE	NO CHANGE	NO CHANGE
TC0900000786.mm.2	Anp32a	4.50842e-05	0.00495736	14.5296	14.0619	-0.467659	0.0012354	0.703305	0.424933	-0.278372	0.15625	21.3978	22.2142	0.81637	0.562633	24	NO CHANGE	NO CHANGE	DOWN
TC1600001008.mm.2	Son	4.51618e-05	0.000260649	9.62708	9.88113	0.254048	0.00013141	0.348685	0.217626	-0.131059	0.128292	5.35659	2.44799	-2.9086	0.0267416	24	NO CHANGE	ADVANCE	UP
TC0400002479.mm.2	Sigmar1	4.57089e-05	2.66564e-05	15.5213	15.3792	-0.142004	0.157424	0.542732	0.487267	-0.0554652	0.693667	23.9648	0.549983	0.585171	0.575617	24	NO CHANGE	NO CHANGE	NO CHANGE
TC0900001099.mm.2	Sh3bgrl2	4.61932e-05	5.11599e-06	8.93125	7.83696	-1.09429	2.99292e-15	0.520365	0.462496	-0.0578696	0.653466	7.96024	9.1037	1.14346	0.249735	24	NO CHANGE	NO CHANGE	DOWN
TC1600001213.mm.2	Rsl1d1	4.68932e-05	0.0057083	11.0862	10.8156	-0.270675	0.0163048	0.503271	0.356266	-0.147005	0.336786	14.7442	15.0049	0.26078	0.85754	24	NO CHANGE	NO CHANGE	DOWN
TC0600000131.mm.2	Met	4.68975e-05	0.00301388	11.3825	11.3736	-0.00886905	0.91164	0.350098	0.305039	-0.0450591	0.691451	8.69944	7.59376	-1.10569	0.405674	24	NO CHANGE	NO CHANGE	NO CHANGE
TC1100002869.mm.2	Srebf1; Mir6922	4.78238e-05	0.005207	9.47042	8.51873	-0.951687	0.000807058	1.06655	0.960675	-0.105874	0.775594	13.9095	17.5136	3.60408	0.0151716	24	NO CHANGE	DELAY	DOWN
TC1300000834.mm.2	Gm7969	4.79028e-05	0.0422488	8.95125	8.84181	-0.109444	0.338784	0.583276	0.237437	-0.345839	0.0348869	0.0873226	2.6612	2.57388	0.207513	24	DOWN	NO CHANGE	NO CHANGE
TC0800003076.mm.2	Aprt	4.79938e-05	0.0295054	9.93667	9.35472	-0.581944	5.98923e-05	0.392471	0.392844	0.000372968	0.99838	13.0345	17.5875	4.55301	0.0155566	24	NO CHANGE	DELAY	DOWN
TC0200002753.mm.2	Gm14327	4.82304e-05	3.06484e-05	14.3167	13.7947	-0.522004	2.12301e-05	0.661394	0.413382	-0.248012	0.110391	15.8797	15.697	-0.182704	0.880731	24	NO CHANGE	NO CHANGE	DOWN
TC1600000038.mm.2	Mgrn1	4.85886e-05	0.0162809	10.1592	9.46802	-0.691151	3.33225e-07	0.518914	0.335787	-0.183127	0.266686	9.41872	10.115	0.696233	0.649838	24	NO CHANGE	NO CHANGE	DOWN
TC0500002760.mm.2	Scarb2	4.86944e-05	0.000682513	12.6658	11.9315	-0.734345	8.00408e-15	0.262112	0.28711	0.0249976	0.776705	11.3533	13.134	1.78068	0.152787	24	NO CHANGE	NO CHANGE	DOWN
TC0500003625.mm.2	Urad	4.87702e-05	0.00168523	11.9804	12.5839	0.603452	1.35351e-06	0.469065	0.436341	-0.0327231	0.829277	16.4216	18.765	2.34343	0.074329	24	NO CHANGE	NO CHANGE	UP
TC1400000318.mm.2	Nek4	4.89395e-05	0.0343837	8.52458	8.28756	-0.237024	0.0388896	0.46839	0.298303	-0.170088	0.290403	0.0305874	21.3406	-2.68998	0.114537	24	NO CHANGE	NO CHANGE	DOWN
TC1000000015.mm.2	Mthfd1l	4.92844e-05	3.18223e-05	5.61208	5.40665	-0.205437	0.0876543	0.565819	0.660559	0.0947407	0.571603	11.9719	12.917	0.94514	0.369389	24	NO CHANGE	NO CHANGE	NO CHANGE
TC0600002253.mm.2	Cycs	5.037e-05	0.490744	15.525	16.0218	0.496806	2.8832e-10	0.329524	0.0377686	-0.291756	0.00132756	17.4966	18.3166	0.820031	0.896039	24	DOWN	NO CHANGE	UP
TC1100004270.mm.2	Tlcd2	5.06355e-05	0.00284289	12.9217	15.661	2.73933	3.5612e-24	0.675636	0.402445	-0.273191	0.134856	21.1233	23.4748	2.35155	0.0955248	24	NO CHANGE	NO CHANGE	UP
TC0500001572.mm.2	Abhd11	5.06659e-05	0.0339937	7.8075	8.47038	0.662877	1.00343e-08	0.493395	0.196211	-0.297183	0.0278327	14.6116	18.0127	3.40111	0.09289	24	DOWN	NO CHANGE	UP
TC0100002319.mm.2	Nab1	5.16629e-05	0.000189669	9.8625	10.2902	0.427738	3.2381e-06	0.451348	0.311372	-0.139975	0.22403	7.86245	8.7377	0.87525	0.460264	24	NO CHANGE	NO CHANGE	UP
TC0900001489.mm.2	Dclk3	5.23828e-05	0.0236631	5.02125	4.83692	-0.184325	0.199269	0.642199	0.38374	-0.258459	0.205013	14.2491	19.7535	5.50441	0.00167725	24	NO CHANGE	DELAY	NO CHANGE
TC0900003004.mm.2	Alas1	5.2881e-05	3.97758e-05	16.5108	15.9903	-0.520536	0.0712817	1.5294	1.3281	-0.201301	0.614297	12.7903	13.4831	0.692805	0.523279	24	NO CHANGE	NO CHANGE	NO CHANGE
TC0X00000131.mm.2	Mid1ip1	5.28812e-05	0.0200774	7.48833	7.65288	0.164544	0.561372	1.03899	0.862633	-0.176358	0.657793	14.7233	18.0764	3.35306	0.0461972	24	NO CHANGE	DELAY	NO CHANGE
TC0600003603.mm.2	Grcc10	5.30251e-05	0.0307615	13.8225	13.5205	-0.301964	0.00341014	0.420648	0.252064	-0.168584	0.222837	17.4741	17.4323	-0.0418199	0.981014	24	NO CHANGE	NO CHANGE	DOWN
TC1200000201.mm.2	Klf11	5.31592e-05	0.0324722	5.80792	5.46058	-0.347341	0.0240869	0.698602	0.361577	-0.337025	0.114521	5.71563	6.45561	0.739983	0.680554	24	NO CHANGE	NO CHANGE	DOWN
TC1100004147.mm.2	Tk1	5.40667e-05	0.00477041	6.06958	5.8296	-0.23998	0.0253292	0.570904	0.291916	-0.278988	0.0644096	15.7238	12.3333	-3.39051	0.0312613	24	NO CHANGE	ADVANCE	DOWN
TC0700004666.mm.2	Fgfr2	5.43693e-05	0.000310285	7.83625	8.04034	0.204087	0.111697	0.610704	0.56923	-0.0414736	0.817012	5.72894	7.50708	1.77814	0.129363	24	NO CHANGE	NO CHANGE	NO CHANGE
TC0200005350.mm.2	Gm14308	5.48497e-05	0.000359831	13.8096	13.9658	0.15623	0.0893473	0.413612	0.414743	0.00113108	0.99291	17.7198	18.3992	0.679382	0.566345	24	NO CHANGE	NO CHANGE	NO CHANGE
TC1900001419.mm.2	Lipa	5.50251e-05	0.0771405	13.8012	13.6606	-0.140675	0.0501586	0.338139	0.137484	-0.200655	0.0504975	21.8614	22.9522	1.09083	0.601284	24	NO CHANGE	NO CHANGE	NO CHANGE
TC0500002770.mm.2	Ccni	5.54835e-05	0.000268203	15.8429	15.7829	-0.0600198	0.36567	0.312704	0.302806	-0.00989827	0.91523	3.70451	6.32857	2.62406	0.0287048	24	NO CHANGE	DELAY	NO CHANGE
TC1100001550.mm.2	Lasp1	5.58488e-05	6.63858e-05	14.965	14.3571	-0.607897	1.03425e-05	0.620002	0.58771	-0.0322914	0.850538	0.455438	1.7745	1.31906	0.232819	24	NO CHANGE	NO CHANGE	DOWN
TC0300001382.mm.2	Ppp3ca	5.59825e-05	0.0384895	11.5612	11.329	-0.232262	0.0210215	0.411167	0.25054	-0.160627	0.252062	8.62992	9.07783	0.447904	0.794799	24	NO CHANGE	NO CHANGE	DOWN
TC0600003045.mm.2	Atp6v1e1	5.6001e-05	0.0840382	11.2417	11.0815	-0.160139	0.0976437	0.301248	0.2251	-0.0761486	0.575434	10.2839	11.1565	0.872556	0.662263	24	NO CHANGE	NO CHANGE	NO CHANGE
TC1900000373.mm.2	Klf9	5.62697e-05	0.0116699	10.8587	10.4321	-0.426647	0.0838625	1.02856	0.777943	-0.250618	0.470372	4.62798	9.00365	4.37567	0.00482081	24	NO CHANGE	DELAY	NO CHANGE
TC0800002516.mm.2	Mmaa	5.69848e-05	0.00518345	7.58	7.21554	-0.364464	0.00306027	0.534	0.396067	-0.137933	0.406382	17.6122	19.7156	2.10341	0.137099	24	NO CHANGE	NO CHANGE	DOWN
TC0700002166.mm.2	Ppp6r1	5.7846e-05	0.188491	10.1342	10.5639	0.429702	1.1801e-08	0.312313	0.0777419	-0.234571	0.00831298	8.76958	3.5574	-5.21219	0.106529	24	DOWN	NO CHANGE	UP
TC0200000007.mm.2	Phxr1	5.78974e-05	0.321603	5.02667	4.68187	-0.344802	0.0222279	0.725892	0.144985	-0.580906	0.00667875	6.76849	14.7361	7.96761	0.0534656	24	DOWN	NO CHANGE	DOWN
TC1100001293.mm.2	Bcas3	5.8118e-05	0.0911347	7.3325	7.27528	-0.0572222	0.604647	0.463129	0.227649	-0.23548	0.140361	7.40653	8.92006	1.51353	0.460731	24	NO CHANGE	NO CHANGE	NO CHANGE
TC0100002707.mm.2	C130026I21Rik; A530032D15Rik	5.82495e-05	0.0103583	5.75333	5.80464	0.0513095	0.611648	0.468384	0.296367	-0.172017	0.226764	3.04897	3.78355	0.734579	0.640653	24	NO CHANGE	NO CHANGE	NO CHANGE
TC1200001982.mm.2	Zfyve26	5.83554e-05	0.00102648	9.21375	9.23488	0.021131	0.835179	0.459223	0.415426	-0.0437978	0.758443	6.06003	5.38881	-0.671225	0.598425	24	NO CHANGE	NO CHANGE	NO CHANGE
TC1100003296.mm.2	Slc13a2	5.86762e-05	0.0105376	6.95708	5.89466	-1.06242	9.25532e-09	0.715589	0.441933	-0.273655	0.203244	21.1493	22.5571	1.40776	0.349366	24	NO CHANGE	NO CHANGE	DOWN
TC1100002100.mm.2	4921536K21Rik	6.01472e-05	0.0630172	3.36833	3.33351	-0.0348214	0.701109	0.471594	0.163703	-0.307891	0.0189021	3.04165	3.51397	0.472322	0.837557	24	DOWN	NO CHANGE	NO CHANGE
TC0600003599.mm.2	Gm11128	6.01849e-05	0.0281824	5.14042	4.26083	-0.879583	3.48183e-06	0.993178	0.265927	-0.72725	0.00297002	16.8532	17.6158	0.762617	0.761724	24	DOWN	NO CHANGE	DOWN
TC0300000792.mm.2	Gatad2b	6.07604e-05	0.0331153	10.2667	10.5233	0.256667	0.0077257	0.469611	0.205129	-0.264482	0.0487425	5.95891	7.84478	1.88587	0.31676	24	DOWN	NO CHANGE	UP
TC0300002620.mm.2	Nr1h5	6.11168e-05	0.0685804	5.16542	5.36847	0.203056	0.150463	0.562596	0.315875	-0.246722	0.217867	12.1443	11.9614	-0.182949	0.924388	24	NO CHANGE	NO CHANGE	NO CHANGE
TC0Y00000325.mm.2	Gm29073	6.12886e-05	0.0425337	6.00875	5.26448	-0.744266	0.000733573	0.880094	0.497506	-0.382588	0.19136	1.20814	1.19757	-0.010571	0.995374	24	NO CHANGE	NO CHANGE	DOWN
TC1000002003.mm.2	Amd2	6.14864e-05	0.000592479	8.2975	7.80208	-0.495417	0.000185602	0.709889	0.375034	-0.334855	0.0581941	11.7195	11.6132	-0.106347	0.939003	24	NO CHANGE	NO CHANGE	DOWN
TC0100002690.mm.2	Pid1	6.16941e-05	2.17761e-05	11.4492	12.1368	0.687659	5.41883e-08	0.556155	0.512242	-0.0439133	0.764683	0.154578	1.99257	1.83799	0.0899398	24	NO CHANGE	NO CHANGE	UP
TC1700001986.mm.2	Atat1	6.18029e-05	0.00240777	10.1817	11.133	0.95129	2.18828e-11	0.556535	0.326258	-0.230277	0.12294	0.0772095	3.55414	3.47693	0.0211921	24	NO CHANGE	DELAY	UP
TC0900001459.mm.2	Scap	6.2224e-05	8.42632e-05	10.9679	11.8647	0.896786	6.33766e-12	0.392036	0.529115	0.137079	0.30755	4.34555	6.06103	1.71549	0.141548	24	NO CHANGE	NO CHANGE	UP
TC1700001838.mm.2	Akap8	6.25899e-05	0.0154924	7.30458	7.14194	-0.162639	0.0719149	0.34588	0.280303	-0.0655777	0.603452	15.334	11.93	-3.40407	0.0323259	24	NO CHANGE	ADVANCE	NO CHANGE
TC0100002600.mm.2	Cnppd1	6.29963e-05	0.00494984	10.0437	9.06052	-0.983234	1.84318e-09	0.668566	0.389432	-0.279134	0.135149	6.73432	10.3118	3.57748	0.0169196	24	NO CHANGE	DELAY	DOWN
TC1700001642.mm.2	Ndufb10	6.32704e-05	0.356744	8.94333	8.79508	-0.148254	0.267253	0.468718	0.153776	-0.314942	0.0983435	16.146	13.1907	-2.95536	0.401376	24	NO CHANGE	NO CHANGE	NO CHANGE
TC0800001917.mm.2	Ddhd2	6.33925e-05	0.00274636	8.67042	8.48663	-0.18379	0.147482	0.689017	0.356813	-0.332204	0.0633449	11.5462	15.4891	3.94294	0.0140572	24	NO CHANGE	DELAY	NO CHANGE
TC0700000319.mm.2	Vmn1r100	6.34807e-05	0.0633641	4.51708	4.18508	-0.332004	0.079111	0.609948	0.451764	-0.158183	0.543723	2.44391	2.73561	0.291707	0.882968	24	NO CHANGE	NO CHANGE	NO CHANGE
TC0700000340.mm.2	Vmn1r148	6.34817e-05	0.0633639	4.51708	4.18508	-0.332004	0.079111	0.609948	0.451764	-0.158183	0.543723	2.44391	2.73561	0.291699	0.88297	24	NO CHANGE	NO CHANGE	NO CHANGE
TC0100003478.mm.2	Uck2	6.36494e-05	0.0453377	8.0375	3.94925	-4.08825	3.98457e-29	0.522364	0.36637	-0.155994	0.436706	14.7435	11.7791	-2.96437	0.100951	24	NO CHANGE	NO CHANGE	DOWN
TC1000003119.mm.2	Lrp1	6.44315e-05	0.0720304	13.0867	12.4195	-0.667183	7.36939e-09	0.347824	0.207685	-0.140138	0.283738	5.33085	5.34945	0.0186059	0.992652	24	NO CHANGE	NO CHANGE	DOWN
TC0900003066.mm.2	Arih2	6.47737e-05	6.74747e-05	9.24083	9.02075	-0.220079	0.0147736	0.468857	0.392683	-0.0761747	0.541396	8.17318	9.95788	1.7847	0.107398	24	NO CHANGE	NO CHANGE	DOWN
TC1300000278.mm.2	BC005537	6.53341e-05	0.0191835	16.5263	17.2698	0.743591	2.01499e-16	0.268721	0.144477	-0.124244	0.120538	14.2053	16.1679	1.96265	0.261395	24	NO CHANGE	NO CHANGE	UP
TC0800002008.mm.2	Ubxn8	6.53597e-05	0.0198275	9.09958	8.43462	-0.66496	2.96448e-10	0.348878	0.232499	-0.116379	0.316745	9.61219	8.4522	-1.15999	0.466946	24	NO CHANGE	NO CHANGE	DOWN
TC0600001810.mm.2	Pdk4	6.53813e-05	0.501367	5.89583	5.193	-0.702837	0.00976433	1.11553	0.19558	-0.919951	0.0150293	22.1187	4.02131	5.90264	0.272852	24	DOWN	NO CHANGE	DOWN
TC1000001480.mm.2	Llph	6.5661e-05	0.00416738	10.1492	9.75216	-0.397004	9.62057e-05	0.419169	0.323751	-0.0954181	0.468856	14.0132	12.2272	-1.78594	0.198235	24	NO CHANGE	NO CHANGE	DOWN
TC0400000018.mm.2	Chchd7	6.66989e-05	0.143542	7.61292	8.24494	0.632024	2.87261e-08	0.428489	0.153633	-0.274856	0.0442011	14.1029	22.0179	7.915	0.00214492	24	DOWN	NO CHANGE	UP
TC0300000747.mm.2	Pklr	6.71169e-05	0.107805	12.3442	10.9008	-1.44333	1.03925e-06	0.933459	0.520841	-0.412618	0.255539	13.4369	19.8319	6.39502	0.00423956	24	NO CHANGE	NO CHANGE	DOWN
TC0200005114.mm.2	Sdc4	6.72763e-05	0.000327926	13.6846	14.2467	0.562163	6.58479e-06	0.474805	0.517267	0.0424622	0.782414	4.96557	5.63604	0.670471	0.578002	24	NO CHANGE	NO CHANGE	UP
TC0X00001781.mm.2	Magix	6.75626e-05	0.00440095	7.01125	6.28304	-0.728214	3.62286e-09	0.495556	0.309842	-0.185714	0.190411	22.2394	21.9555	-0.28384	0.84046	24	NO CHANGE	NO CHANGE	DOWN
TC1900001511.mm.2	Frat2	6.77214e-05	0.146091	3.82	3.76562	-0.0543849	0.585539	0.426075	0.171961	-0.254114	0.0798982	0.562335	9.56624	9.00391	0.000416108	24	NO CHANGE	NO CHANGE	NO CHANGE
TC0200003654.mm.2	Grb14	6.78129e-05	8.95718e-05	9.06333	9.30385	0.240516	0.0127278	0.46063	0.438362	-0.0222684	0.864201	4.98882	5.34762	0.358799	0.750605	24	NO CHANGE	NO CHANGE	UP
TC0100003603.mm.2	Grem2	6.83982e-05	0.000198729	6.29792	6.23399	-0.0639286	0.693735	0.85453	0.681233	-0.173297	0.455982	8.80305	9.00549	0.202443	0.860484	24	NO CHANGE	NO CHANGE	NO CHANGE
TC0900000358.mm.2	Tmem218	6.90145e-05	0.000355508	7.36667	7.32722	-0.0394444	0.743851	0.520597	0.571412	0.0508147	0.765234	2.23844	1.51466	-0.723777	0.547125	24	NO CHANGE	NO CHANGE	NO CHANGE
TC0600000565.mm.2	Gimap9	6.92904e-05	0.0873562	6.20708	6.08859	-0.118492	0.439158	0.733133	0.273224	-0.459909	0.0362347	18.5547	17.1	-1.45469	0.534265	24	DOWN	NO CHANGE	NO CHANGE
TC0200000909.mm.2	44262	6.93221e-05	0.00104619	10.01	10.1261	0.116131	0.333775	0.627283	0.411442	-0.215841	0.203099	6.29473	5.92821	-0.366519	0.785148	24	NO CHANGE	NO CHANGE	NO CHANGE
TC0900000737.mm.2	Nptn	6.96226e-05	6.89792e-05	11.8133	12.2187	0.405337	2.56326e-07	0.298616	0.363253	0.0646369	0.496038	13.0581	10.4641	-2.59406	0.0206135	24	NO CHANGE	ADVANCE	UP
TC0200003298.mm.2	Uck1	6.96671e-05	0.000753601	10.05	11.817	1.76698	7.21646e-17	0.564437	0.583086	0.0186484	0.92012	17.213	21.6497	4.43664	0.000657286	24	NO CHANGE	DELAY	UP
TC0700000430.mm.2	Cyp2b10	6.99772e-05	0.0193536	6.13083	4.95173	-1.17911	1.49847e-05	1.34047	0.515058	-0.825411	0.0204412	18.6885	11.6042	-7.08432	0.000578152	24	DOWN	ADVANCE	DOWN
TC1200000500.mm.2	Pnn	7.02566e-05	0.0035616	11.2587	11.1703	-0.0884325	0.226237	0.322003	0.259203	-0.0628003	0.54039	15.8912	18.8772	2.986	0.0346224	24	NO CHANGE	DELAY	NO CHANGE
TC1000000884.mm.2	Eef2	7.0498e-05	0.00455533	17.1767	17.2501	0.0734524	0.0854703	0.153007	0.162559	0.00955208	0.87212	7.95843	12.9223	4.96383	0.00121098	24	NO CHANGE	DELAY	NO CHANGE
TC0300002230.mm.2	Fgb	7.0499e-05	0.0478579	18.0587	17.9326	-0.126131	0.042096	0.240351	0.145675	-0.0946766	0.267226	4.0596	2.93104	-1.12855	0.55147	24	NO CHANGE	NO CHANGE	DOWN
TC1700002191.mm.2	Rpl7l1	7.07117e-05	0.0109096	11.3417	11.2567	-0.0849405	0.269334	0.37261	0.216442	-0.156168	0.155948	17.0201	20.2734	3.25323	0.0408304	24	NO CHANGE	DELAY	NO CHANGE
TC0100000794.mm.2	Dis3l2	7.07604e-05	0.21297	8.19333	7.76143	-0.431905	4.90679e-06	0.369721	0.117463	-0.252259	0.0378322	8.36214	10.2819	1.91973	0.492452	24	DOWN	NO CHANGE	DOWN
TC0400002251.mm.2	Ripk2	7.09824e-05	1.85471e-05	6.68917	7.59391	0.904742	1.68279e-08	0.777849	0.499689	-0.278159	0.140168	7.85061	9.25044	1.39984	0.23568	24	NO CHANGE	NO CHANGE	UP
TC1900001253.mm.2	Gda	7.13404e-05	0.000369898	10.9279	11.1464	0.218532	0.0421052	0.54775	0.405199	-0.14255	0.33651	16.2763	18.1734	1.89711	0.131625	24	NO CHANGE	NO CHANGE	UP
TC0200005342.mm.2	Gm14440; Gm14288	7.19746e-05	0.000102268	14.5608	14.0649	-0.495913	1.66469e-05	0.586893	0.367003	-0.21989	0.129519	15.9105	15.8248	-0.0856835	0.946749	24	NO CHANGE	NO CHANGE	DOWN
TC0400002729.mm.2	D630039A03Rik	7.2018e-05	0.0702878	6.33375	5.29855	-1.0352	2.37323e-08	0.733522	0.283141	-0.450381	0.0380375	5.31232	4.31486	-0.997456	0.657678	24	DOWN	NO CHANGE	DOWN
TC0X00001286.mm.2	Armcx1	7.26e-05	0.0527553	4.92417	5.06635	0.142183	0.141729	0.429681	0.207108	-0.222573	0.101743	15.8629	2.76053	10.8976	2.30819e-06	24	NO CHANGE	NO CHANGE	NO CHANGE
TC1100002364.mm.2	Ahsa2	7.26635e-05	0.000698324	9.83667	9.71173	-0.12494	0.285372	0.53973	0.479363	-0.0603673	0.711681	16.479	17.9088	1.42985	0.255694	24	NO CHANGE	NO CHANGE	NO CHANGE
TC0900001927.mm.2	Herpud2	7.29909e-05	0.000251585	11.83	11.7033	-0.126746	0.0656102	0.305069	0.323611	0.0185412	0.846799	5.17123	8.11899	2.94776	0.013758	24	NO CHANGE	DELAY	NO CHANGE
TC0900000793.mm.2	Cln6	7.31195e-05	0.321329	5.83417	5.77762	-0.0565476	0.752583	0.866637	0.187003	-0.679633	0.0108859	7.62291	10.592	2.9691	0.424893	24	DOWN	NO CHANGE	NO CHANGE
TC0700001774.mm.2	Aqp8	7.35742e-05	0.0429793	12.385	10.7931	-1.5919	0.000247606	1.46061	1.06559	-0.395023	0.49009	21.6409	22.3471	0.706216	0.686864	24	NO CHANGE	NO CHANGE	DOWN
TC0800002953.mm.2	Bcar1	7.49022e-05	0.0107119	8.25792	7.71042	-0.5475	5.30025e-06	0.515609	0.29782	-0.21779	0.152285	7.2859	8.68774	1.40184	0.367362	24	NO CHANGE	NO CHANGE	DOWN
TC0700003568.mm.2	Pex11a	7.59674e-05	0.000995229	10.7392	10.3691	-0.37006	0.0719518	0.679855	0.977337	0.297482	0.302528	16.0328	12.0454	-3.98741	0.00550724	24	NO CHANGE	ADVANCE	NO CHANGE
TC1100000407.mm.2	Nudcd2	7.60021e-05	0.544807	10.9167	10.8685	-0.0481548	0.480084	0.263812	0.0492979	-0.214514	0.0303306	15.2224	0.898374	9.67595	0.0793113	24	DOWN	NO CHANGE	NO CHANGE
TC1600000150.mm.2	Mkl2	7.64685e-05	0.545567	11.8338	11.7044	-0.129385	0.116246	0.40982	0.047181	-0.362639	0.00275337	23.2178	18.674	-4.54384	0.499563	24	DOWN	NO CHANGE	NO CHANGE
TC0600000849.mm.2	Tmem150a	7.66465e-05	3.04366e-05	12.6675	11.6864	-0.981071	4.54356e-10	0.442988	0.785289	0.342301	0.0514536	19.0266	18.7505	-0.276118	0.817643	24	NO CHANGE	NO CHANGE	DOWN
TC1800000891.mm.2	Fbxo15	7.7036e-05	0.612613	3.49542	3.14292	-0.3525	8.13739e-05	0.447542	0.0341056	-0.413436	0.000772456	21.5927	6.81442	9.22172	0.320612	24	DOWN	NO CHANGE	DOWN
TC1800000851.mm.2	Txnl4a	7.73348e-05	0.155952	9.55375	9.27012	-0.283631	0.0186168	0.513373	0.182607	-0.330766	0.0476143	14.7567	16.9023	2.14566	0.420895	24	DOWN	NO CHANGE	DOWN
TC0600001448.mm.2	Nop2	7.74422e-05	3.17725e-05	9.11625	9.28387	0.167619	0.274788	0.772275	0.750075	-0.0221999	0.916976	15.205	16.0967	0.891744	0.417236	24	NO CHANGE	NO CHANGE	NO CHANGE
TC0200005105.mm.2	Wfdc5	7.74993e-05	0.0345237	3.60083	3.56046	-0.040377	0.679546	0.475991	0.221538	-0.254453	0.0724102	22.7401	7.92028	9.18016	1.19332e-05	24	NO CHANGE	DELAY	NO CHANGE
TC0200005339.mm.2	Gm14434; 0610010B08Rik; Gm4724	7.77336e-05	0.000581495	13.7542	13.9023	0.148095	0.125466	0.41966	0.419043	-0.000617357	0.99633	17.6514	18.352	0.700606	0.570298	24	NO CHANGE	NO CHANGE	NO CHANGE
TC1500000298.mm.2	Fzd6	7.77573e-05	0.014939	6.12542	6.22018	0.0947619	0.40576	0.61415	0.251583	-0.362566	0.0266698	5.35508	3.63342	-1.72165	0.370577	24	DOWN	NO CHANGE	NO CHANGE
TC0800001307.mm.2	Tat	7.89837e-05	0.00181338	18.2763	18.7337	0.45748	1.02492e-05	0.463259	0.303442	-0.159817	0.215987	18.4234	15.8211	-2.60225	0.069754	24	NO CHANGE	NO CHANGE	UP
TC0300000675.mm.2	Sh3d19	7.95904e-05	0.00396286	12.2117	11.7421	-0.469583	4.85395e-05	0.533175	0.312891	-0.220284	0.138982	5.88107	6.68201	0.80094	0.590421	24	NO CHANGE	NO CHANGE	DOWN
TC1100003559.mm.2	Luc7l3	7.98279e-05	0.0058432	8.93667	8.81371	-0.122956	0.141964	0.337234	0.285097	-0.0521373	0.652569	18.5496	17.0215	-1.52807	0.301446	24	NO CHANGE	NO CHANGE	NO CHANGE
TC0500001370.mm.2	Atxn2	8.02323e-05	0.168141	13.6721	13.1932	-0.478849	0.0021343	0.731343	0.202505	-0.528838	0.0142875	4.35523	7.06517	2.70994	0.353113	24	DOWN	NO CHANGE	DOWN
TC0200002731.mm.2	Gm2026	8.06998e-05	0.00140544	14.4675	14.5573	0.0898016	0.288145	0.344722	0.349052	0.00432967	0.970728	17.0713	17.9173	0.846006	0.521162	24	NO CHANGE	NO CHANGE	NO CHANGE
TC1500001822.mm.2	Txn2	8.07838e-05	0.094021	11.1679	11.3405	0.172619	0.0348808	0.291658	0.16871	-0.122948	0.278449	17.3542	19.0981	1.74393	0.406459	24	NO CHANGE	NO CHANGE	UP
TC0900003300.mm.2	Cdcp1	8.08159e-05	0.000723554	6.115	6.74966	0.634663	8.08463e-06	0.532241	0.566763	0.0345225	0.847095	19.6857	22.4828	2.79713	0.0259984	24	NO CHANGE	DELAY	UP
TC0400000580.mm.2	Slc44a1	8.19928e-05	0.0115175	10.1592	9.09679	-1.06238	5.21052e-13	0.469421	0.306976	-0.162445	0.272744	21.093	23.7287	2.63567	0.0898218	24	NO CHANGE	NO CHANGE	DOWN
TC1300000543.mm.2	Rnf144b	8.2654e-05	0.0189808	8.64458	9.09429	0.449702	0.000331684	0.478353	0.329678	-0.148675	0.362826	22.0346	1.81358	3.779	0.0256964	24	NO CHANGE	DELAY	UP
TC1200000203.mm.2	Rrm2	8.29132e-05	0.00806296	6.41333	8.33456	1.92123	4.70477e-13	0.676835	0.645588	-0.031247	0.904373	13.8411	15.6145	1.77341	0.253294	24	NO CHANGE	NO CHANGE	UP
TC0200004619.mm.2	Idh3b	8.29364e-05	0.0666626	12.7792	12.8137	0.0345635	0.633038	0.321053	0.153282	-0.167771	0.109386	16.2381	11.321	-4.91707	0.0166537	24	NO CHANGE	NO CHANGE	NO CHANGE
TC0600001317.mm.2	Gm7292	8.33045e-05	0.00205248	9.06792	9.093	0.0250794	0.739113	0.318873	0.289627	-0.0292457	0.781136	3.43393	4.41084	0.976908	0.473591	24	NO CHANGE	NO CHANGE	NO CHANGE
TC0500001401.mm.2	P2rx4	8.33396e-05	0.0252233	9.03417	8.51073	-0.523433	0.0110994	0.919084	0.50442	-0.414664	0.147635	8.10911	11.1142	3.00508	0.0819141	24	NO CHANGE	NO CHANGE	DOWN
TC1100003334.mm.2	Utp6	8.35756e-05	0.115923	8.08458	7.91417	-0.170417	0.11085	0.331965	0.216686	-0.115279	0.437398	18.4578	17.9491	-0.508711	0.820711	24	NO CHANGE	NO CHANGE	NO CHANGE
TC0100003422.mm.2	Atp1b1	8.38668e-05	0.00440765	10.9025	11.6783	0.775754	4.02861e-10	0.394517	0.352387	-0.0421301	0.757428	11.0835	11.6463	0.562805	0.683837	24	NO CHANGE	NO CHANGE	UP
TC0100001756.mm.2	Taf1a	8.4065e-05	0.245746	5.75792	5.2954	-0.46252	0.000162122	0.401861	0.15888	-0.242981	0.12624	12.4486	15.8588	3.41021	0.256006	24	NO CHANGE	NO CHANGE	DOWN
TC0600002919.mm.2	Rpusd3	8.48128e-05	0.0797815	8.31167	8.1228	-0.188869	0.0895237	0.35338	0.253502	-0.0998772	0.518867	14.619	18.8968	4.27783	0.0405952	24	NO CHANGE	NO CHANGE	NO CHANGE
TC1700000355.mm.2	Igfals	8.55026e-05	0.00798314	10.7704	10.3265	-0.443869	0.00251671	0.500659	0.49707	-0.00358838	0.985448	16.7033	19.4529	2.74957	0.0720666	24	NO CHANGE	NO CHANGE	DOWN
TC0900000659.mm.2	Idh3a	8.56867e-05	0.00931869	11.4658	14.0027	2.53688	1.82957e-26	0.475995	0.304214	-0.171781	0.240112	14.7047	19.9766	5.27184	0.00112727	24	NO CHANGE	DELAY	UP
TC0200000843.mm.2	Arl6ip6	8.59008e-05	0.682726	7.56792	7.55899	-0.00892857	0.912454	0.399781	0.0333438	-0.366437	0.0028503	8.64803	10.2481	1.60009	0.862355	24	DOWN	NO CHANGE	NO CHANGE
TC0500001302.mm.2	Fbxo21	8.67325e-05	3.65347e-05	8.57125	6.38766	-2.18359	2.39655e-12	1.08425	1.17647	0.0922141	0.772142	6.24169	8.31505	2.07336	0.0563134	24	NO CHANGE	NO CHANGE	DOWN
TC0400001017.mm.2	Ube2u	8.68336e-05	9.20068e-05	5.93167	6.53298	0.60131	0.00113705	0.940076	0.705207	-0.234869	0.34211	22.7825	0.0245032	1.24196	0.290049	24	NO CHANGE	NO CHANGE	UP
TC0500001522.mm.2	Tpst1	8.70254e-05	0.0291871	8.25708	8.51054	0.253452	0.0213609	0.475614	0.266925	-0.20869	0.170948	15.9632	13.0215	-2.94169	0.100123	24	NO CHANGE	NO CHANGE	UP
TC0800000072.mm.2	Gm10217	8.73378e-05	0.00256616	14.8712	14.6709	-0.200357	0.14244	0.587651	0.493894	-0.0937577	0.619669	2.30053	3.13783	0.837297	0.545236	24	NO CHANGE	NO CHANGE	NO CHANGE
TC0100000253.mm.2	Cox5b	8.85431e-05	0.0231452	13.8779	14.0057	0.127738	0.0652828	0.267024	0.194287	-0.0727373	0.451049	20	19.3711	-0.62892	0.703471	24	NO CHANGE	NO CHANGE	NO CHANGE
TC1800000103.mm.2	Lama3	8.94363e-05	0.096495	5.72167	4.05843	-1.66323	3.30644e-13	0.781866	0.272096	-0.50977	0.0290243	14.1516	23.7528	9.60112	0.00019217	24	DOWN	NO CHANGE	DOWN
TC0200004560.mm.2	Zfp661	8.94394e-05	0.169164	5.9725	5.95942	-0.0130754	0.919125	0.491039	0.214305	-0.276735	0.132171	17.2199	18.201	0.981135	0.699956	24	NO CHANGE	NO CHANGE	NO CHANGE
TC1000000752.mm.2	Slc19a1	8.98119e-05	0.098285	7.75875	7.23813	-0.520615	0.000109669	0.577529	0.209685	-0.367844	0.0364078	10.6669	15.7649	5.09808	0.0417722	24	DOWN	NO CHANGE	DOWN
TC1000001145.mm.2	Fgd6	8.99937e-05	0.000143676	8.63125	8.39435	-0.236905	0.0140842	0.437808	0.450315	0.0125073	0.925051	4.4189	9.87142	5.45253	1.5058e-05	24	NO CHANGE	DELAY	DOWN
TC1100004248.mm.2	Ogfod3	9.0195e-05	0.144868	6.6375	6.59532	-0.0421825	0.69486	0.37294	0.202309	-0.170631	0.268028	10.2589	11.9037	1.64481	0.475862	24	NO CHANGE	NO CHANGE	NO CHANGE
TC0200005489.mm.2	Gm14306	9.03269e-05	0.000263717	14.3071	13.7623	-0.544822	4.82633e-06	0.574105	0.359602	-0.214503	0.146001	16.1359	16.1277	-0.00815441	0.995123	24	NO CHANGE	NO CHANGE	DOWN
TC1100003997.mm.2	Abca8b	9.1063e-05	0.0450435	10.3929	8.67639	-1.71653	3.57693e-17	0.552797	0.279431	-0.273366	0.122624	3.56431	6.55107	2.98676	0.124463	24	NO CHANGE	NO CHANGE	DOWN
TC0100002544.mm.2	Fn1	9.183e-05	0.000162918	15.1925	16.2037	1.01125	4.4404e-21	0.312024	0.205411	-0.106613	0.184939	7.4575	6.24172	-1.21578	0.341716	24	NO CHANGE	NO CHANGE	UP
TC0100000925.mm.2	Agxt	9.28162e-05	0.000505669	10.9146	10.0301	-0.884484	4.26658e-07	0.595767	0.685244	0.0894769	0.66615	5.39597	3.87577	-1.52019	0.23525	24	NO CHANGE	NO CHANGE	DOWN
TC0600001193.mm.2	Itpr1	9.28356e-05	0.00266679	10.525	10.3869	-0.138075	0.107963	0.417294	0.280316	-0.136978	0.258253	12.2481	12.0547	-0.193429	0.8888	24	NO CHANGE	NO CHANGE	NO CHANGE
TC0900002969.mm.2	Cdv3	9.28405e-05	0.00414725	12.1746	11.5293	-0.645317	3.17093e-09	0.268576	0.355743	0.0871662	0.47748	12.571	12.9181	0.34707	0.821193	24	NO CHANGE	NO CHANGE	DOWN
TC1400000248.mm.2	Anxa11	9.28433e-05	0.00894762	8.25083	8.2446	-0.00623016	0.940439	0.391067	0.240343	-0.150724	0.201482	13.7178	17.2268	3.50904	0.0313984	24	NO CHANGE	DELAY	NO CHANGE
TC1100000722.mm.2	Jmjd4	9.50905e-05	0.00875158	7.11292	7.09786	-0.0150595	0.888426	0.492343	0.320283	-0.172061	0.259041	13.3984	13.5848	0.186403	0.903771	24	NO CHANGE	NO CHANGE	NO CHANGE
TC0400003369.mm.2	Rnf220	9.53659e-05	0.000113099	9.31375	9.29921	-0.0145437	0.851004	0.371613	0.357393	-0.0142206	0.895493	3.66981	3.445	-0.224808	0.846574	24	NO CHANGE	NO CHANGE	NO CHANGE
TC0300002828.mm.2	Ptbp2	9.59282e-05	0.0454316	9.47125	9.29038	-0.180873	0.0377148	0.437315	0.160572	-0.276743	0.0246352	5.03151	6.311	1.27948	0.558397	24	DOWN	NO CHANGE	DOWN
TC1100003918.mm.2	Smarcd2	9.67631e-05	0.850831	6.71542	6.45782	-0.257599	0.0126598	0.398459	0.0213562	-0.377103	0.00961749	15.4307	14.0983	-1.33238	0.941731	24	DOWN	NO CHANGE	DOWN
TC0900001616.mm.2	Trak1	9.74004e-05	0.116328	9.97875	10.7081	0.729345	1.26897e-09	0.455836	0.153977	-0.301859	0.0294977	10.327	9.82095	-0.506012	0.835489	24	DOWN	NO CHANGE	UP
TC0400001047.mm.2	Pde4b	9.75182e-05	0.0977787	7.76667	8.43321	0.666548	0.000430876	0.68755	0.353587	-0.333963	0.183641	5.01899	0.438863	-4.58012	0.0363808	24	NO CHANGE	NO CHANGE	UP
TC0200004667.mm.2	Slc23a2	9.85087e-05	0.00286135	6.92333	7.38474	0.461409	0.00611815	0.811751	0.503123	-0.308627	0.179412	7.13383	7.16657	0.0327396	0.981857	24	NO CHANGE	NO CHANGE	UP
TC0400001930.mm.2	Mtor	9.90018e-05	0.00383919	9.19583	9.10746	-0.088373	0.467161	0.572729	0.398491	-0.174238	0.313736	6.91852	7.53601	0.617495	0.662752	24	NO CHANGE	NO CHANGE	NO CHANGE
TC0600000648.mm.2	Chn2	9.93258e-05	0.000504913	10.2279	10.3256	0.0976984	0.291364	0.413305	0.403069	-0.0102361	0.937518	10.6636	12.3221	1.65846	0.176264	24	NO CHANGE	NO CHANGE	NO CHANGE
TC1400001673.mm.2	Phf7	9.99595e-05	0.615372	6.08	5.82244	-0.25756	0.0541658	0.452079	0.0798772	-0.372202	0.0469815	12.2572	15.3334	3.07621	0.638982	24	DOWN	NO CHANGE	NO CHANGE
TC0300001378.mm.2	Slc39a8	0.00010117	0.0683871	10.2021	9.98085	-0.22123	0.0135538	0.347519	0.186052	-0.161467	0.187129	22.702	2.31078	3.60879	0.0831769	24	NO CHANGE	NO CHANGE	DOWN
TC1000000830.mm.2	Wdr18	0.000101354	0.36601	9.93833	9.32323	-0.615099	8.27107e-09	0.338182	0.0898351	-0.248347	0.0441752	15.6843	17.5003	1.81598	0.639321	24	DOWN	NO CHANGE	DOWN
TC1900000206.mm.2	Vwce	0.000101734	0.344195	8.47875	7.00452	-1.47423	5.97021e-12	0.634318	0.169863	-0.464455	0.0397495	8.9481	13.1301	4.18196	0.257745	24	DOWN	NO CHANGE	DOWN
TC1300000623.mm.2	Sfxn1	0.000102258	0.00950302	12.7083	12.6289	-0.0794444	0.368987	0.375928	0.269381	-0.106546	0.388677	16.3264	15.4944	-0.832029	0.595188	24	NO CHANGE	NO CHANGE	NO CHANGE
TC0400003116.mm.2	Tm2d1	0.000103287	0.352165	10.2179	10.2487	0.0308135	0.723378	0.352085	0.0933474	-0.258737	0.0400262	9.47377	6.62434	-2.84943	0.447142	24	DOWN	NO CHANGE	NO CHANGE
TC0800000976.mm.2	2310036O22Rik	0.000104637	0.214705	12.8821	12.8059	-0.0761905	0.366497	0.28761	0.13036	-0.15725	0.187413	22.8308	5.97583	7.14502	0.0123837	24	NO CHANGE	NO CHANGE	NO CHANGE
TC0400004135.mm.2	Rer1	0.000104772	0.0274925	10.2667	10.2526	-0.0140873	0.90682	0.463258	0.330468	-0.132791	0.435177	13.5467	13.6508	0.104059	0.951866	24	NO CHANGE	NO CHANGE	NO CHANGE
TC1400001627.mm.2	Appl1	0.000104915	0.00177194	9.7625	9.40173	-0.360774	0.00188388	0.409393	0.462186	0.0527924	0.732121	22.8556	1.41232	2.55677	0.0661635	24	NO CHANGE	NO CHANGE	DOWN
TC1400000072.mm.2	Abhd6	0.000104959	0.0612595	12.2383	13.0173	0.778988	1.3224e-05	0.852379	0.25098	-0.601399	0.00923198	16.6113	15.5177	-1.09362	0.672957	24	DOWN	NO CHANGE	UP
TC0200002751.mm.2	Gm14322	0.000105804	0.00473061	11.9146	11.7545	-0.160119	0.132947	0.540719	0.289409	-0.25131	0.0926942	16.5315	16.0354	-0.49617	0.758259	24	NO CHANGE	NO CHANGE	NO CHANGE
TC0800001883.mm.2	Gpat4	0.000106195	0.00727768	11.7292	10.4753	-1.25387	4.67412e-15	0.428443	0.357094	-0.071349	0.633427	14.3479	11.2496	-3.09832	0.0368666	24	NO CHANGE	ADVANCE	DOWN
TC1400000851.mm.2	Spata13	0.000106231	0.00188424	6.35917	6.18562	-0.173552	0.151531	0.590061	0.403702	-0.186359	0.274239	4.55489	7.21196	2.65707	0.058428	24	NO CHANGE	NO CHANGE	NO CHANGE
TC0300002481.mm.2	Adamtsl4	0.000106396	0.566083	6.90708	6.83683	-0.0702579	0.59488	0.474373	0.0904309	-0.383942	0.0424351	2.68945	4.55169	1.86224	0.75045	24	DOWN	NO CHANGE	NO CHANGE
TC1000000126.mm.2	Reps1	0.000107308	0.103876	9.73958	9.89478	0.155198	0.151185	0.605317	0.129502	-0.475815	0.00286519	5.07095	6.9358	1.86486	0.56765	24	DOWN	NO CHANGE	NO CHANGE
TC0100001757.mm.2	Hhipl2	0.00010734	0.544023	3.45958	3.60768	0.148095	0.173544	0.51081	0.0667583	-0.444052	0.00582589	3.65992	8.78197	5.12205	0.407935	24	DOWN	NO CHANGE	NO CHANGE
TC1500002295.mm.2	Npff; Atf7	0.000107646	0.661513	9.7	9.63165	-0.0683532	0.457058	0.289032	0.050563	-0.238469	0.0692601	8.91736	14.2702	5.35286	0.458555	24	NO CHANGE	NO CHANGE	NO CHANGE
TC0400003437.mm.2	Ctps	0.000107885	0.0182605	6.315	6.53758	0.222579	0.1235	0.473576	0.444	-0.0295764	0.882038	16.9265	16.906	-0.02051	0.990368	24	NO CHANGE	NO CHANGE	NO CHANGE
TC0200004676.mm.2	Gpcpd1	0.000108105	0.0259701	8.61375	9.69506	1.08131	0.000627321	1.05773	0.858245	-0.199484	0.633687	8.87895	8.09432	-0.784629	0.639874	24	NO CHANGE	NO CHANGE	UP
TC0500002415.mm.2	Sepsecs	0.000108113	0.590934	9.44833	10.5267	1.07835	2.06847e-16	0.387907	0.0451079	-0.342799	0.00524763	13.7511	22.9257	9.17464	0.189344	24	DOWN	NO CHANGE	UP
TC0X00000668.mm.2	Nsdhl	0.000108367	0.155491	13.8817	16.3492	2.46754	9.40319e-24	0.576603	0.159894	-0.416709	0.0143912	8.18777	2.22261	-5.96516	0.0492087	24	DOWN	NO CHANGE	UP
TC0600000359.mm.2	Akr1d1	0.000108866	0.437622	13.5567	15.0557	1.49901	4.20928e-16	0.630536	0.0747002	-0.555836	0.00163375	17.9257	8.56412	-9.36156	0.121318	24	DOWN	NO CHANGE	UP
TC1200002272.mm.2	Serpina6	0.000109141	0.0382942	11.2958	13.1243	1.82847	1.39374e-15	0.635112	0.355055	-0.280057	0.185058	12.0351	7.864	-4.17108	0.0254459	24	NO CHANGE	ADVANCE	UP
TC0200001053.mm.2	Zak	0.000109286	0.00097848	6.11167	6.25784	0.146171	0.0963696	0.340754	0.382103	0.0413493	0.73528	6.79861	13.0063	6.20769	2.00953e-05	24	NO CHANGE	DELAY	NO CHANGE
TC1700001465.mm.2	Unc93a; Gm9992	0.000109739	0.124669	5.82583	5.06246	-0.763373	3.57335e-06	0.608394	0.246458	-0.361936	0.0772739	4.85469	5.15532	0.300626	0.902654	24	NO CHANGE	NO CHANGE	DOWN
TC1900000335.mm.2	Aldh1a1	0.000110211	0.303244	17.6742	16.6082	-1.06599	6.98349e-13	0.225953	0.147854	-0.0780993	0.595342	19.4629	14.3476	-5.11529	0.124079	24	NO CHANGE	NO CHANGE	DOWN
TC0100000237.mm.2	Hs6st1	0.000110521	0.231885	8.65375	9.82476	1.17101	7.96332e-14	0.512025	0.125808	-0.386217	0.012976	10.5946	15.3755	4.78092	0.170304	24	DOWN	NO CHANGE	UP
TC0400001147.mm.2	Zcchc11	0.000110675	0.00976348	5.19917	5.76389	0.564722	0.000317865	0.67654	0.421864	-0.254676	0.222172	8.21183	10.3009	2.08906	0.17541	24	NO CHANGE	NO CHANGE	UP
TC0400002007.mm.2	Dnajc11	0.000110797	0.291266	8.84417	9.21343	0.369266	0.000166603	0.358586	0.112525	-0.246061	0.0601641	12.8367	22.9657	10.129	0.00248149	24	NO CHANGE	NO CHANGE	UP
TC1000002657.mm.2	Nr1h4	0.000110805	0.0306742	12.4738	12.055	-0.41879	0.00121877	0.632641	0.238305	-0.394336	0.0245597	14.4674	14.5912	0.123791	0.953554	24	DOWN	NO CHANGE	DOWN
TC0800002702.mm.2	Ces1d	0.00011126	0.00252806	15.3912	14.9313	-0.459921	9.04225e-05	0.59443	0.275552	-0.318878	0.0404613	17.2201	11.978	-5.24214	0.00233389	24	DOWN	ADVANCE	DOWN
TC1100003990.mm.2	Slc16a6	0.000111447	0.0158898	8.12875	9.13226	1.00351	3.45181e-07	0.831974	0.412387	-0.419587	0.0835107	21.5517	21.8395	0.287858	0.865549	24	NO CHANGE	NO CHANGE	UP
TC1800001054.mm.2	Garem	0.000111497	0.0363682	8.53917	8.00504	-0.534127	0.000807024	0.476294	0.414381	-0.0619132	0.767513	6.05209	6.40592	0.353828	0.846315	24	NO CHANGE	NO CHANGE	DOWN
TC0200005438.mm.2	Helz2	0.000111538	0.000527654	10.2613	10.9674	0.70619	1.01657e-07	0.545599	0.434165	-0.111434	0.481218	0.787339	21.5482	-3.23916	0.0111519	24	NO CHANGE	ADVANCE	UP
TC0400000654.mm.2	Ugcg	0.000112918	0.0755698	8.86125	8.48974	-0.371508	0.0174387	0.519359	0.350091	-0.169268	0.432663	7.48051	8.29862	0.818107	0.678832	24	NO CHANGE	NO CHANGE	DOWN
TC1200001601.mm.2	Hbp1	0.000113057	0.00761453	12.0183	11.6406	-0.377778	0.00356298	0.462924	0.418547	-0.0443765	0.79639	3.66611	4.70881	1.0427	0.497277	24	NO CHANGE	NO CHANGE	DOWN
TC1600000097.mm.2	1810013L24Rik	0.000113435	0.000887573	9.14083	8.92185	-0.218988	0.0139911	0.416565	0.326475	-0.0900897	0.463984	6.33131	9.10526	2.77394	0.0327326	24	NO CHANGE	DELAY	DOWN
TC0400002638.mm.2	Aldob	0.00011391	0.00571189	19.5058	19.4146	-0.0911905	0.000877638	0.106272	0.0861869	-0.0200851	0.576394	15.7752	17.6844	1.90914	0.200125	24	NO CHANGE	NO CHANGE	DOWN
TC1700002207.mm.2	Taf8	0.000114143	0.00261225	9.68875	9.70232	0.0135714	0.857683	0.334599	0.274772	-0.059827	0.577407	5.72789	7.25048	1.52259	0.267132	24	NO CHANGE	NO CHANGE	NO CHANGE
TC0X00001533.mm.2	Hsd17b10	0.000114728	0.643085	14.2433	13.9118	-0.331488	0.0010414	0.255689	0.0569448	-0.198745	0.138052	17.7194	3.15899	9.43956	0.163154	24	NO CHANGE	NO CHANGE	DOWN
TC1000001621.mm.2	Mmp19	0.000115791	0.00163983	12.0492	12.309	0.259821	0.0198776	0.469763	0.423805	-0.0459578	0.764878	18.9184	20.1825	1.26409	0.334098	24	NO CHANGE	NO CHANGE	UP
TC1100003917.mm.2	Ftsj3	0.000116238	0.34321	7.02333	6.91679	-0.106548	0.380523	0.524782	0.125821	-0.398961	0.0240017	15.7055	12.7806	-2.92488	0.443681	24	DOWN	NO CHANGE	NO CHANGE
TC0200004251.mm.2	Prrg4	0.000116292	1.96608e-05	5.82375	6.38411	0.560357	0.00278449	0.82642	0.985475	0.159055	0.527227	9.14564	12.7228	3.57713	0.00160369	24	NO CHANGE	DELAY	UP
TC1500001090.mm.2	Soat2	0.000119216	3.44733e-05	10.7929	10.0898	-0.703135	2.64583e-06	0.616322	0.674579	0.0582569	0.751517	5.62368	7.14717	1.52349	0.166599	24	NO CHANGE	NO CHANGE	DOWN
TC0800000482.mm.2	Slc7a2	0.000119287	0.0112204	14.2867	12.914	-1.3727	5.39044e-07	0.758297	0.822165	0.0638676	0.847513	7.25866	8.61529	1.35663	0.392938	24	NO CHANGE	NO CHANGE	DOWN
TC0600002582.mm.2	Tex261	0.000119965	0.335619	10.88	11.0529	0.172857	0.0106324	0.302631	0.0639678	-0.238664	0.0124929	15.6946	19.0409	3.34629	0.405435	24	DOWN	NO CHANGE	UP
TC1100002028.mm.2	Hgs	0.000121909	0.04512	9.40375	9.72248	0.31873	1.32801e-05	0.278973	0.150742	-0.128231	0.169961	23.7945	20.359	-3.43552	0.0698447	24	NO CHANGE	NO CHANGE	UP
TC0200005334.mm.2	Gm14391; Gm6710	0.000122259	0.00642577	13.38	13.4962	0.116171	0.217311	0.420075	0.287186	-0.13289	0.312304	15.9394	17.2445	1.30517	0.395122	24	NO CHANGE	NO CHANGE	NO CHANGE
TC1500001920.mm.2	St13	0.000122289	0.631252	10.7817	10.2632	-0.518492	7.04104e-08	0.34016	0.0411916	-0.298969	0.0102051	17.3074	14.3766	-2.93076	0.701083	24	DOWN	NO CHANGE	DOWN
TC0700002771.mm.2	Cox6b1	0.000123304	0.0584688	12.8775	13.0531	0.175595	0.0369472	0.261562	0.201468	-0.0600942	0.600851	17.4394	16.9813	-0.458098	0.818079	24	NO CHANGE	NO CHANGE	UP
TC0700002636.mm.2	Ceacam2	0.000124515	0.00155371	3.51	3.88423	0.374226	3.52121e-05	0.348336	0.311333	-0.0370038	0.74435	4.53172	4.40312	-0.128597	0.924295	24	NO CHANGE	NO CHANGE	UP
TC0200005349.mm.2	Gm14308	0.000125836	0.000471277	13.8387	13.9564	0.117659	0.194302	0.395331	0.390146	-0.00518516	0.967301	17.7068	18.4987	0.791859	0.523441	24	NO CHANGE	NO CHANGE	NO CHANGE
TC0400004191.mm.2	Slc6a9	0.000126262	0.00417022	10.5504	10.3037	-0.246706	0.0901485	0.637394	0.487833	-0.149561	0.4649	12.3726	11.4167	-0.955937	0.495692	24	NO CHANGE	NO CHANGE	NO CHANGE
TC0100002950.mm.2	Epb41l5	0.00012638	0.0155364	11.5337	10.8547	-0.679087	1.07648e-08	0.39696	0.284278	-0.112682	0.412103	8.04811	11.0911	3.04303	0.0578429	24	NO CHANGE	NO CHANGE	DOWN
TC0700001644.mm.2	Mical2	0.000126432	0.000652144	7.24083	7.41583	0.175	0.223765	0.483202	0.713869	0.230667	0.259949	22.8806	23.5733	0.692646	0.607929	24	NO CHANGE	NO CHANGE	NO CHANGE
TC1500000821.mm.2	Ppara	0.00012692	0.00180525	12.5996	12.2071	-0.3925	0.0309309	0.650808	0.76573	0.114922	0.649611	10.2713	10.5746	0.303251	0.821763	24	NO CHANGE	NO CHANGE	DOWN
TC1000003215.mm.2	Sumo3	0.000126961	0.0716533	10.7996	10.6101	-0.189504	0.064255	0.434701	0.198933	-0.235767	0.0988328	0.673494	2.7929	2.11941	0.330544	24	NO CHANGE	NO CHANGE	NO CHANGE
TC1600000190.mm.2	Prkdc	0.000127217	0.085208	6.43208	6.70867	0.276587	0.0522658	0.482824	0.299281	-0.183544	0.348756	14.7586	15.0907	0.332068	0.876244	24	NO CHANGE	NO CHANGE	NO CHANGE
TC1000001897.mm.2	Arg1	0.000127453	0.0417706	15.4371	15.6125	0.175456	0.0167774	0.242497	0.184955	-0.0575417	0.563495	17.2911	14.255	-3.03615	0.108331	24	NO CHANGE	NO CHANGE	UP
TC0200002056.mm.2	Plcb1	0.000128657	0.0120819	9.83958	9.73244	-0.107143	0.338648	0.275919	0.408413	0.132494	0.402345	10.6019	12.9322	2.3303	0.212587	24	NO CHANGE	NO CHANGE	NO CHANGE
TC0300003247.mm.2	Amy1	0.000128772	0.655536	13.3779	13.3465	-0.0313889	0.798999	0.391607	0.0705078	-0.321099	0.0723824	19.4494	19.9021	0.452664	0.946825	24	NO CHANGE	NO CHANGE	NO CHANGE
TC1800001138.mm.2	Stard4	0.000129387	0.215549	11.2654	11.3637	0.0983136	0.518033	0.680527	0.204227	-0.476301	0.0328885	10.0689	9.94599	-0.122873	0.966525	24	DOWN	NO CHANGE	NO CHANGE
TC0200001006.mm.2	Dhrs9	0.000129619	0.00775913	5.05042	5.8774	0.826984	0.000640171	0.960372	0.731912	-0.22846	0.47929	23.3758	22.2601	-1.11569	0.446314	24	NO CHANGE	NO CHANGE	UP
TC0400002151.mm.2	Cyp7a1	0.000129635	0.00389512	15.5896	17.4884	1.89879	3.13814e-10	1.28863	0.549532	-0.739101	0.0293951	15.0796	12.2437	-2.83592	0.111331	24	DOWN	NO CHANGE	UP
TC0300003139.mm.2	Dnajb4	0.000129882	0.00422792	10.4679	9.99712	-0.470794	0.00176247	0.620135	0.469882	-0.150253	0.449465	15.6659	16.6027	0.936729	0.524549	24	NO CHANGE	NO CHANGE	DOWN
TC0200005331.mm.2	Gm14399	0.000130219	0.000907433	16.2525	15.9942	-0.258254	0.0108948	0.489943	0.331257	-0.158686	0.248037	15.805	16.6683	0.863277	0.533131	24	NO CHANGE	NO CHANGE	DOWN
TC1700001400.mm.2	Gm9992	0.000130709	0.00515912	5.61792	4.69919	-0.91873	3.0218e-07	0.752507	0.435013	-0.317495	0.144735	5.57786	7.70318	2.12531	0.170779	24	NO CHANGE	NO CHANGE	DOWN
TC1100002155.mm.2	Pold2	0.000130816	0.0409149	9.15125	9.4577	0.306448	0.0011917	0.394011	0.197836	-0.196174	0.120164	12.3235	14.1321	1.80853	0.355021	24	NO CHANGE	NO CHANGE	UP
TC0600003020.mm.2	Erc1	0.000131112	0.0110155	10.7142	10.9457	0.231548	0.0201681	0.455806	0.259289	-0.196517	0.152088	15.8358	14.0182	-1.81761	0.276321	24	NO CHANGE	NO CHANGE	UP
TC1500002318.mm.2	Itga5	0.000131135	0.147644	5.73167	5.54476	-0.186905	0.111998	0.505701	0.180146	-0.325555	0.0498969	19.7323	17.0638	-2.66849	0.321293	24	DOWN	NO CHANGE	NO CHANGE
TC0400004058.mm.2	H6pd	0.000131243	0.0159169	13.635	12.3596	-1.27544	1.62181e-10	0.489299	0.486613	-0.00268643	0.989906	2.93903	3.68598	0.746949	0.660957	24	NO CHANGE	NO CHANGE	DOWN
TC0800002470.mm.2	Smim7	0.000131823	0.0264342	12.3588	12.4605	0.101706	0.128504	0.287142	0.17062	-0.116522	0.221013	8.65728	9.56282	0.905538	0.594556	24	NO CHANGE	NO CHANGE	NO CHANGE
TC0100003872.mm.2	Irf6	0.000131993	0.162924	10.7888	10.4842	-0.304583	0.00649045	0.532242	0.139286	-0.392955	0.0121484	1.76679	1.46388	-0.302909	0.921525	24	DOWN	NO CHANGE	DOWN
TC1700001805.mm.2	Glo1	0.000133691	0.453316	15.7525	13.4077	-2.3448	3.71045e-27	0.366015	0.0786821	-0.287333	0.0307777	1.02543	21.2239	-3.80153	0.394567	24	DOWN	NO CHANGE	DOWN
TC0200003629.mm.2	Fap	0.000133965	0.195015	3.74667	4.15391	0.407242	0.00468427	0.408238	0.237685	-0.170553	0.384738	3.22273	20.513	-6.70974	0.0108756	24	NO CHANGE	NO CHANGE	UP
TC0200004965.mm.2	Gss	0.000134021	0.000243338	9.91167	9.22179	-0.689881	2.68357e-05	0.382721	0.879072	0.496351	0.0221733	8.67722	10.069	1.39177	0.380513	24	UP	NO CHANGE	DOWN
TC1200000688.mm.2	Fut8	0.000134451	0.0275454	5.76708	6.26964	0.50256	0.000111698	0.483005	0.31861	-0.164395	0.334171	16.1088	10.1904	-5.91833	0.00099657	24	NO CHANGE	ADVANCE	UP
TC0700001814.mm.2	Mapk3	0.00013488	0.00297364	11.2583	11.2595	0.00115079	0.99006	0.362458	0.362797	0.000338703	0.997955	7.73193	10.2738	2.54184	0.0671999	24	NO CHANGE	NO CHANGE	NO CHANGE
TC0200004896.mm.2	Trib3	0.000135222	0.00549626	5.68417	5.53478	-0.149385	0.257134	0.724362	0.286537	-0.437826	0.0207017	6.45777	4.94296	-1.51481	0.432692	24	DOWN	NO CHANGE	NO CHANGE
TC0900001290.mm.2	Anapc13	0.000135276	0.000117946	14.4342	14.2501	-0.184107	0.0112408	0.290607	0.358124	0.0675177	0.492035	19.2056	17.7855	-1.42019	0.234652	24	NO CHANGE	NO CHANGE	DOWN
TC0200002755.mm.2	Etohi1	0.000135699	0.00111472	16.1971	15.8876	-0.309464	0.00313565	0.512432	0.31232	-0.200112	0.154118	15.9565	16.4319	0.475369	0.743407	24	NO CHANGE	NO CHANGE	DOWN
TC0100003253.mm.2	Swt1	0.000135758	0.000660505	5.15042	5.37946	0.229048	0.0626952	0.52593	0.500945	-0.024985	0.882372	15.2044	17.385	2.18052	0.0942131	24	NO CHANGE	NO CHANGE	NO CHANGE
TC0800001682.mm.2	Lig4	0.000135811	0.127615	6.175	6.04419	-0.130814	0.336383	0.675395	0.188859	-0.486536	0.0132866	15.7595	15.7224	-0.0371114	0.989891	24	DOWN	NO CHANGE	NO CHANGE
TC0500001576.mm.2	Tbl2	0.000135823	0.0162714	8.37292	8.32109	-0.051825	0.70856	0.664345	0.341958	-0.322387	0.103557	15.4495	18.0534	2.60387	0.145843	24	NO CHANGE	NO CHANGE	NO CHANGE
TC1500000644.mm.2	Mpst	0.000136853	0.0493434	7.91208	7.82591	-0.0861706	0.471001	0.502364	0.274866	-0.227498	0.186116	18.4842	21.0267	2.54253	0.178733	24	NO CHANGE	NO CHANGE	NO CHANGE
TC1900001346.mm.2	Ermp1	0.000137392	0.0693304	6.545	6.03179	-0.513214	0.000571026	0.636534	0.258366	-0.378167	0.0556898	11.8174	16.0158	4.19847	0.0695972	24	NO CHANGE	NO CHANGE	DOWN
TC0X00002671.mm.2	Las1l	0.000137601	0.0323864	8.52667	8.25752	-0.269147	0.0345233	0.415924	0.341484	-0.0744394	0.667925	16.468	16.9373	0.469286	0.796391	24	NO CHANGE	NO CHANGE	DOWN
TC0800002818.mm.2	Lrrc29	0.000137611	0.172313	5.18667	5.22655	0.039881	0.665896	0.412084	0.132428	-0.279656	0.0357175	7.44576	5.77684	-1.66892	0.559806	24	DOWN	NO CHANGE	NO CHANGE
TC1600001191.mm.2	Emp2	0.000137979	0.180078	6.87375	6.79907	-0.0746826	0.633198	0.508128	0.267767	-0.240361	0.27924	5.57597	13.3458	7.76981	0.00376593	24	NO CHANGE	NO CHANGE	NO CHANGE
TC1400001418.mm.2	Gm6356	0.000138089	0.813336	5.78042	5.64032	-0.140099	0.31813	0.342303	0.0441064	-0.298197	0.134893	0.283882	1.45041	1.16653	0.924928	24	NO CHANGE	NO CHANGE	NO CHANGE
TC0200004953.mm.2	Ahcy; Gm4737	0.00013913	0.0363215	17.6321	17.21	-0.422063	8.82034e-07	0.303989	0.176943	-0.127045	0.220953	16.5411	17.1045	0.563471	0.763438	24	NO CHANGE	NO CHANGE	DOWN
TC0200001049.mm.2	Rapgef4	0.000139357	0.000161887	13.5162	13.3395	-0.176766	0.271401	0.724588	0.762582	0.0379945	0.867788	6.66147	10.1663	3.50486	0.00373044	24	NO CHANGE	DELAY	NO CHANGE
TC0900000692.mm.2	Ptpn9	0.000139713	0.0111948	8.48375	8.64325	0.159504	0.117625	0.52185	0.232495	-0.289355	0.0462108	22.7712	1.43103	2.65985	0.150723	24	DOWN	NO CHANGE	NO CHANGE
TC1400000324.mm.2	Tnnc1	0.000140704	0.0035816	7.19875	7.05899	-0.139762	0.299943	0.68829	0.37589	-0.3124	0.104712	17.0035	19.0134	2.00993	0.202225	24	NO CHANGE	NO CHANGE	NO CHANGE
TC1400001537.mm.2	Anxa7	0.000140834	0.000116279	8.61	7.73073	-0.879266	1.15418e-08	0.460998	0.710235	0.249237	0.166256	10.3773	9.45869	-0.918649	0.45121	24	NO CHANGE	NO CHANGE	DOWN
TC1800000265.mm.2	Wdr36	0.000141252	0.000941569	9.00917	9.20089	0.191726	0.0431199	0.463682	0.313474	-0.150208	0.251301	13.397	17.9133	4.51627	0.00200492	24	NO CHANGE	DELAY	UP
TC0500001337.mm.2	Sds	0.000142183	0.0701845	10.4008	9.91635	-0.484484	0.00903621	0.611055	0.402873	-0.208182	0.404403	12.3573	16.3421	3.98473	0.0585962	24	NO CHANGE	NO CHANGE	DOWN
TC0300000853.mm.2	S100a10	0.000143255	0.000743237	10.6608	10.7816	0.120734	0.414855	0.585536	0.666673	0.0811373	0.699132	0.548218	0.0148928	-0.533325	0.675341	24	NO CHANGE	NO CHANGE	NO CHANGE
TC0800001420.mm.2	Osgin1	0.000143887	0.00233524	12.7992	14.6134	1.81419	2.87892e-11	0.983798	0.650272	-0.333526	0.246251	2.44654	1.77924	-0.667305	0.644083	24	NO CHANGE	NO CHANGE	UP
TC4_JH584294_random00000008.mm.2	Gm2023; Ccl19	0.000145159	0.0851761	6.07292	6.38	0.307083	0.00989816	0.466947	0.231197	-0.23575	0.152583	4.03068	11.6484	7.61775	0.000716008	24	NO CHANGE	NO CHANGE	UP
TC1500000704.mm.2	Fam83f	0.000145165	0.290076	3.08542	2.86486	-0.220556	0.0878257	0.524667	0.153893	-0.370775	0.0461651	16.8752	21.3702	4.495	0.171282	24	DOWN	NO CHANGE	NO CHANGE
TC1700002573.mm.2	Atl2	0.000145978	0.000813134	13.5204	14.9682	1.44778	2.86889e-23	0.275001	0.311328	0.0363262	0.714136	14.2106	14.3339	0.123324	0.925285	24	NO CHANGE	NO CHANGE	UP
TC1600000988.mm.2	Mrap	0.00014614	0.00140554	11.5329	12.4852	0.952282	4.23413e-07	0.665324	0.654936	-0.0103883	0.963675	19.5324	22.4896	2.95722	0.0262848	24	NO CHANGE	DELAY	UP
TC0300001719.mm.2	Naaladl2	0.000146272	0.0019653	5.98708	5.79107	-0.196012	0.2065	0.705058	0.553624	-0.151433	0.491123	12.6464	11.2259	-1.42051	0.290962	24	NO CHANGE	NO CHANGE	NO CHANGE
TC1000001895.mm.2	Enpp3	0.000147136	0.0563847	13.8163	10.9493	-2.86698	2.10615e-16	0.740452	0.53091	-0.209542	0.495398	2.8026	6.18056	3.37796	0.0884279	24	NO CHANGE	NO CHANGE	DOWN
TC1200001874.mm.2	L2hgdh	0.000148504	0.0369505	9.74417	8.72	-1.02417	3.74073e-13	0.374873	0.254464	-0.120409	0.390408	14.3904	12.546	-1.84442	0.304992	24	NO CHANGE	NO CHANGE	DOWN
TC0400000662.mm.2	Snx30	0.000148724	0.00655091	6.94083	6.91675	-0.0240873	0.825637	0.494377	0.341361	-0.153017	0.330209	6.11154	9.25229	3.14076	0.0376265	24	NO CHANGE	DELAY	NO CHANGE
TC0200000551.mm.2	Ass1; Gm5424	0.000149492	0.177678	17.8538	17.4987	-0.35506	6.74787e-05	0.253436	0.14344	-0.109996	0.3419	22.1088	22.8527	0.743875	0.760595	24	NO CHANGE	NO CHANGE	DOWN
TC1900000162.mm.2	Ubxn1	0.000149632	9.99836e-05	8.08125	8.43298	0.351726	0.000461596	0.402036	0.461957	0.0599201	0.645067	2.38462	3.9301	1.54548	0.1951	24	NO CHANGE	NO CHANGE	UP
TC1300001812.mm.2	Nrn1	0.000150346	0.285726	14.6704	15.8507	1.18028	3.75477e-14	0.472925	0.117095	-0.35583	0.0207736	5.0217	7.05714	2.03543	0.569354	24	DOWN	NO CHANGE	UP
TC1700001855.mm.2	Zfp870	0.000150363	0.0103795	9.81875	9.92847	0.109722	0.363956	0.5469	0.347178	-0.199722	0.248757	18.6074	20.9795	2.37209	0.131878	24	NO CHANGE	NO CHANGE	NO CHANGE
TC1700002562.mm.2	Prkd3	0.000150457	0.00426334	14.3929	13.4421	-0.950794	1.84133e-08	0.592679	0.461821	-0.130858	0.499603	4.91089	6.1965	1.28561	0.378385	24	NO CHANGE	NO CHANGE	DOWN
TC0100002305.mm.2	Nabp1	0.000150751	0.00740761	8.71083	8.89325	0.182421	0.214776	0.571385	0.483522	-0.0878636	0.667864	9.37485	14.2385	4.86367	0.00255179	24	NO CHANGE	DELAY	NO CHANGE
TC0100002772.mm.2	A730008H23Rik; Hjurp; 6430706D22Rik	0.000151396	0.267811	12.1508	14.3485	2.19762	1.30372e-18	0.477341	0.2056	-0.271741	0.191513	9.58918	9.97318	0.383997	0.893832	24	NO CHANGE	NO CHANGE	UP
TC0X00001634.mm.2	Phka2	0.000151915	0.00232974	10.31	10.2922	-0.0177579	0.839987	0.416827	0.286153	-0.130674	0.291612	5.22759	4.92244	-0.305152	0.833284	24	NO CHANGE	NO CHANGE	NO CHANGE
TC0700002977.mm.2	Med25	0.000152767	0.129602	8.06417	7.81216	-0.252004	0.00909748	0.422439	0.142542	-0.279897	0.0353949	4.13189	15.7249	11.593	9.47791e-05	24	DOWN	NO CHANGE	DOWN
TC0200005140.mm.2	Ncoa5	0.000153388	0.294309	6.15958	6.17073	0.0111508	0.928947	0.617136	0.118364	-0.498772	0.00645593	19.5424	15.5759	-3.96654	0.352221	24	DOWN	NO CHANGE	NO CHANGE
TC0600001917.mm.2	Tspan12	0.000153466	1.65756e-05	15.9542	16.1409	0.186766	0.00346408	0.257759	0.369726	0.111967	0.200151	9.82883	9.05851	-0.770319	0.477944	24	NO CHANGE	NO CHANGE	UP
TC0800002107.mm.2	Cnot7	0.000153787	0.000576441	10.945	11.1211	0.176111	0.0557955	0.393076	0.386087	-0.00698935	0.956422	6.7553	7.81168	1.05638	0.39726	24	NO CHANGE	NO CHANGE	NO CHANGE
TC0500001338.mm.2	Slc8b1	0.000154599	0.0142378	9.60417	10.0624	0.458194	0.0830395	1.18818	0.68691	-0.501269	0.175636	5.51847	6.55306	1.03459	0.539656	24	NO CHANGE	NO CHANGE	NO CHANGE
TC1400001315.mm.2	Farp1	0.000156703	0.0304459	8.19125	8.18006	-0.0111905	0.905553	0.462378	0.202224	-0.260155	0.0585484	8.94944	8.59141	-0.358025	0.852974	24	NO CHANGE	NO CHANGE	NO CHANGE
TC1900000693.mm.2	Tmem180	0.000156876	0.000819635	7.54833	7.63312	0.0847817	0.509942	0.53649	0.555208	0.0187172	0.918704	0.305887	21.154	-3.15189	0.0156174	24	NO CHANGE	ADVANCE	NO CHANGE
TC1200000498.mm.2	Gemin2	0.000156928	0.034693	6.22833	6.23053	0.00220009	0.986706	0.536262	0.326973	-0.209289	0.26417	12.6893	13.6647	0.975434	0.593987	24	NO CHANGE	NO CHANGE	NO CHANGE
TC1200001369.mm.2	Ubxn2a	0.000156992	0.0312365	8.85708	8.81304	-0.0440478	0.668689	0.499467	0.215366	-0.284101	0.0543354	16.9893	14.3497	-2.63953	0.197325	24	NO CHANGE	NO CHANGE	NO CHANGE
TC0600002491.mm.2	Mat2a	0.000157824	7.3557e-05	13.2942	13.4995	0.205337	0.0306198	0.440646	0.425275	-0.0153711	0.905618	14.3131	14.1155	-0.197683	0.864669	24	NO CHANGE	NO CHANGE	UP
TC0400002022.mm.2	Rpl22	0.000158829	0.121954	13.5692	13.1594	-0.409802	2.84626e-06	0.248765	0.153656	-0.0951093	0.382823	19.7567	11.3177	-8.43903	0.000403156	24	NO CHANGE	NO CHANGE	DOWN
TC0800001925.mm.2	Hgsnat	0.000158831	0.00996869	9.68667	9.1571	-0.529563	3.60207e-06	0.37214	0.322267	-0.0498732	0.720843	13.9333	14.8368	0.903488	0.568373	24	NO CHANGE	NO CHANGE	DOWN
TC1800001307.mm.2	Cdo1	0.000159399	5.87547e-07	17.3258	17.8875	0.561647	1.14909e-13	0.27516	0.283831	0.0086708	0.90498	2.95153	4.78549	1.83395	0.07602	24	NO CHANGE	NO CHANGE	UP
TC0700003406.mm.2	Klf13	0.00015986	0.000450952	8.25833	9.46149	1.20315	4.93752e-12	0.535545	0.567641	0.0320961	0.857995	12.0535	12.2036	0.150084	0.902999	24	NO CHANGE	NO CHANGE	UP
TC0900001578.mm.2	Xylb	0.000159925	0.013885	13.1646	12.1088	-1.05583	2.9811e-14	0.48868	0.205046	-0.283634	0.0381556	7.37186	11.5331	4.16126	0.0312515	24	DOWN	DELAY	DOWN
TC1100003318.mm.2	Wsb1	0.000160556	0.802768	8.09125	6.93976	-1.15149	1.35471e-06	0.954828	0.0508375	-0.903991	0.00332601	2.78797	23.924	-2.864	0.852614	24	DOWN	NO CHANGE	DOWN
TC0500003186.mm.2	Trafd1	0.000161088	0.279673	9.64167	9.85169	0.21002	0.0168271	0.361903	0.10162	-0.260284	0.0365221	5.40348	21.0964	-8.30708	0.0146551	24	DOWN	NO CHANGE	UP
TC0200005081.mm.2	Gm20267	0.000161535	0.0178697	10.3629	10.1605	-0.20244	0.0188853	0.307015	0.248749	-0.0582663	0.620015	16.3114	18.3011	1.98972	0.234413	24	NO CHANGE	NO CHANGE	DOWN
TC1100001706.mm.2	Hexim1	0.000162764	0.0867611	7.86	7.28103	-0.578968	1.07376e-05	0.497813	0.223695	-0.274118	0.103386	19.2633	20.374	1.11065	0.608381	24	NO CHANGE	NO CHANGE	DOWN
TC1000002727.mm.2	Mrpl42	0.000163763	0.0296073	13.1896	13.8144	0.624782	2.46862e-11	0.285799	0.18068	-0.10512	0.292965	15.9666	21.7863	5.8197	0.00145901	24	NO CHANGE	DELAY	UP
TC0200000490.mm.2	Tsc1	0.000163884	0.529432	9.72625	9.17153	-0.554722	8.01406e-06	0.531018	0.0633266	-0.467691	0.0039278	6.18176	1.75316	-4.42861	0.514382	24	DOWN	NO CHANGE	DOWN
TC0800001429.mm.2	Klhl36	0.000165334	0.0289845	5.0275	4.88968	-0.137817	0.150526	0.353749	0.259501	-0.0942479	0.4844	21.4132	19.6699	-1.74337	0.315141	24	NO CHANGE	NO CHANGE	NO CHANGE
TC0600003205.mm.2	Fkbp4	0.000165507	0.00373322	10.9783	11.7811	0.802718	6.8864e-05	0.83444	0.601238	-0.233202	0.373088	18.3341	21.0881	2.75404	0.0568126	24	NO CHANGE	NO CHANGE	UP
TC0X00000704.mm.2	Rpl10; Snora70	0.000165811	0.000656227	16.2633	16.3931	0.129722	0.0100266	0.149891	0.238157	0.0882659	0.195986	17.1092	16.0045	-1.10471	0.450143	24	NO CHANGE	NO CHANGE	UP
TC1100001578.mm.2	Psmd3	0.000166469	0.00346344	11.3013	11.3034	0.00214286	0.982393	0.358574	0.378218	0.0196446	0.886842	7.46563	7.88997	0.424342	0.764765	24	NO CHANGE	NO CHANGE	NO CHANGE
TC1400000421.mm.2	1700024B05Rik	0.000166886	0.310749	4.52667	4.0999	-0.426766	0.0142447	0.612792	0.199913	-0.41288	0.0842108	0.697322	3.07936	2.38204	0.49291	24	NO CHANGE	NO CHANGE	DOWN
TC1200001237.mm.2	Tnfaip2	0.000169023	0.000291645	9.60458	11.1718	1.5672	5.80418e-13	0.712648	0.640166	-0.072482	0.736992	23.7295	1.3366	1.60705	0.195958	24	NO CHANGE	NO CHANGE	UP
TC0400000108.mm.2	Rbm12b1	0.000169087	0.0210835	11.3192	11.1412	-0.177937	0.0496269	0.377461	0.23873	-0.138731	0.276615	19.9621	21.7689	1.80687	0.278697	24	NO CHANGE	NO CHANGE	DOWN
TC1000002658.mm.2	Slc17a8	0.000169139	0.00979991	6.68542	5.14627	-1.53915	1.09859e-13	0.76402	0.298668	-0.465353	0.0246757	18.8254	18.8757	0.0502285	0.979657	24	DOWN	NO CHANGE	DOWN
TC0700000236.mm.2	Slc1a5	0.000171022	0.00267623	4.5475	6.34629	1.79879	9.68609e-16	0.538275	0.550842	0.0125669	0.949893	9.79505	16.1017	6.30666	7.05343e-05	24	NO CHANGE	DELAY	UP
TC1600001527.mm.2	Umps	0.000171517	0.0122264	9.34	8.98454	-0.355456	0.0333012	0.602262	0.508148	-0.0941142	0.679172	15.4538	17.0232	1.56947	0.334971	24	NO CHANGE	NO CHANGE	DOWN
TC0200001575.mm.2	Gm11060	0.00017365	0.0452412	10.4962	10.4019	-0.0943852	0.538819	0.501768	0.392785	-0.108983	0.611748	3.17197	3.18782	0.0158414	0.993424	24	NO CHANGE	NO CHANGE	NO CHANGE
TC1000001024.mm.2	Rfx4	0.000173845	0.000267827	5.705	7.80617	2.10117	1.47936e-11	0.836646	1.18614	0.349489	0.285238	1.12922	0.650146	-0.479074	0.707004	24	NO CHANGE	NO CHANGE	UP
TC0800001577.mm.2	Coa6	0.000173878	0.0661282	8.31667	8.51452	0.197857	0.116679	0.556648	0.236697	-0.319951	0.0709786	15.3449	15.5803	0.235448	0.916172	24	NO CHANGE	NO CHANGE	NO CHANGE
TC0700000896.mm.2	Nav2	0.000174106	0.11784	8.66375	9.27181	0.608056	0.00379019	0.812708	0.362979	-0.449728	0.120097	4.42978	21.6579	-6.77189	0.00456916	24	NO CHANGE	NO CHANGE	UP
TC1100002134.mm.2	Znrf3	0.000176553	0.00139456	8.27583	7.81135	-0.464484	3.59771e-05	0.490349	0.343294	-0.147055	0.31012	6.5188	8.89247	2.37367	0.0858743	24	NO CHANGE	NO CHANGE	DOWN
TC0800000353.mm.2	Eif4ebp1	0.000176785	0.00503548	8.905	8.22556	-0.679444	2.29529e-07	0.372227	0.42832	0.0560929	0.721893	12.3168	11.3403	-0.976502	0.512383	24	NO CHANGE	NO CHANGE	DOWN
TC0500001512.mm.2	Cct6a; Snora15	0.000177351	9.19811e-05	10.5337	10.613	0.0792659	0.305219	0.293975	0.428589	0.134613	0.221264	16.157	19.6401	3.4831	0.00573939	24	NO CHANGE	DELAY	NO CHANGE
TC0200005476.mm.2	Nup35	0.000177448	0.012613	6.97	7.15063	0.180635	0.158821	0.635342	0.291906	-0.343436	0.0586342	16.3336	17.5411	1.20752	0.517562	24	NO CHANGE	NO CHANGE	NO CHANGE
TC1100002854.mm.2	Zkscan17	0.000177644	0.0192178	6.17	6.06506	-0.10494	0.325516	0.484472	0.26869	-0.215782	0.158544	6.26195	8.33722	2.07528	0.230546	24	NO CHANGE	NO CHANGE	NO CHANGE
TC0400003383.mm.2	St3gal3	0.000178855	0.00514031	12.9408	13.2559	0.315099	0.000922268	0.403868	0.273526	-0.130341	0.301677	5.50031	6.8099	1.3096	0.386625	24	NO CHANGE	NO CHANGE	UP
TC1000002538.mm.2	Hmg20b	0.000179527	0.0654863	8.25083	8.33603	0.0851984	0.299498	0.357917	0.15899	-0.198927	0.086936	14.7834	15.2438	0.460463	0.834178	24	NO CHANGE	NO CHANGE	NO CHANGE
TC0200001843.mm.2	Sord	0.000179821	3.52485e-07	17.5867	16.7681	-0.818611	7.95925e-17	0.304581	0.380616	0.0760356	0.376384	13.8008	12.7719	-1.02894	0.290472	24	NO CHANGE	NO CHANGE	DOWN
TC0200002152.mm.2	Dtd1	0.000180027	0.111468	7.06125	7.00891	-0.0523413	0.532842	0.357529	0.142914	-0.214615	0.0724291	0.985791	3.33103	2.34524	0.345927	24	NO CHANGE	NO CHANGE	NO CHANGE
TC1000000312.mm.2	Hdac2	0.000180419	0.218295	10.0888	9.90687	-0.181885	0.0284937	0.299779	0.119487	-0.180292	0.1211	15.8354	12.0863	-3.7491	0.180921	24	NO CHANGE	NO CHANGE	DOWN
TC0500002461.mm.2	Rell1	0.00018091	0.00720318	7.1825	7.36141	0.178909	0.217322	0.695887	0.383514	-0.312372	0.127092	4.26093	5.83908	1.57815	0.344518	24	NO CHANGE	NO CHANGE	NO CHANGE
TC1500002265.mm.2	Gm5476	0.000181782	0.749416	3.32375	3.51321	0.189464	0.0938898	0.349467	0.0437248	-0.305742	0.0545328	1.7553	4.53209	2.77679	0.783591	24	NO CHANGE	NO CHANGE	NO CHANGE
TC0900002608.mm.2	Cgnl1	0.000182553	0.0236671	8.93542	8.84315	-0.0922619	0.334799	0.470299	0.207893	-0.262406	0.0592089	12.8392	9.74788	-3.09135	0.107235	24	NO CHANGE	NO CHANGE	NO CHANGE
TC0500002919.mm.2	Tgfbr3	0.000182567	0.000532594	7.36625	8.5971	1.23085	1.23583e-14	0.440854	0.477186	0.036332	0.810578	9.76223	10.1849	0.422708	0.732331	24	NO CHANGE	NO CHANGE	UP
TC1900001109.mm.2	Tkfc	0.000184626	0.0753417	13.2063	13.2488	0.0425198	0.761896	0.547678	0.298176	-0.249501	0.215616	13.1112	20.091	6.97984	0.0013325	24	NO CHANGE	NO CHANGE	NO CHANGE
TC1100001681.mm.2	Nags	0.000184626	0.000879909	11.8038	11.6433	-0.160417	0.112785	0.406358	0.42889	0.0225322	0.87395	20.4594	20.5099	0.0505481	0.968468	24	NO CHANGE	NO CHANGE	NO CHANGE
TC0600002116.mm.2	Kdm7a	0.000184917	0.00130413	9.49625	9.56321	0.0669643	0.496967	0.397566	0.406849	0.00928298	0.947142	6.06934	8.27519	2.20585	0.0980327	24	NO CHANGE	NO CHANGE	NO CHANGE
TC1700001888.mm.2	Rps18	0.000187086	0.0551862	14.3425	14.2486	-0.0938889	0.15827	0.23825	0.153497	-0.0847533	0.359854	18.4407	17.2163	-1.22438	0.53739	24	NO CHANGE	NO CHANGE	NO CHANGE
TC0200002013.mm.2	Pank2	0.000187123	0.0441935	10.3025	10.3241	0.0216468	0.808918	0.267504	0.247595	-0.0199086	0.876362	10.0206	9.40754	-0.613067	0.741889	24	NO CHANGE	NO CHANGE	NO CHANGE
TC1500000705.mm.2	Tnrc6b; Mir5113	0.000187305	0.00640645	9.80083	9.59	-0.210833	0.0187984	0.464745	0.188154	-0.276591	0.0273092	2.43991	2.54391	0.104009	0.957282	24	DOWN	NO CHANGE	DOWN
TC0200002729.mm.2	Gm6710; Gm14391	0.000187876	0.00409847	13.4058	13.5647	0.158889	0.113223	0.46558	0.29415	-0.17143	0.219814	16.2257	17.3058	1.08007	0.485542	24	NO CHANGE	NO CHANGE	NO CHANGE
TC0800001230.mm.2	Thap11	0.000188618	0.0569998	5.99708	5.75954	-0.23754	0.0542404	0.489856	0.262349	-0.227507	0.184799	14.2027	13.8413	-0.361344	0.858044	24	NO CHANGE	NO CHANGE	NO CHANGE
TC1100004233.mm.2	Fasn	0.000188754	0.109933	14.4846	16.7138	2.22925	2.9817e-08	1.31392	0.617066	-0.696851	0.143126	13.9392	20.8245	6.88534	0.00344924	24	NO CHANGE	NO CHANGE	UP
TC0400001974.mm.2	Eno1; Eno1b	0.000188844	0.217417	16.7037	17.487	0.783294	2.26106e-17	0.246443	0.0730417	-0.173401	0.0341919	17.7313	21.3554	3.62403	0.232095	24	DOWN	NO CHANGE	UP
TC0200003763.mm.2	Atf2	0.000188891	0.151183	10.5425	10.753	0.210516	0.00604055	0.307554	0.116745	-0.190809	0.0721952	6.07171	12.0305	5.95876	0.0239563	24	NO CHANGE	NO CHANGE	UP
TC0600002904.mm.2	Srgap3	0.000189315	0.00291566	4.76167	4.83946	0.0777976	0.595774	0.65879	0.501806	-0.156984	0.454901	22.1968	21.5097	-0.687015	0.62043	24	NO CHANGE	NO CHANGE	NO CHANGE
TC1100003478.mm.2	Rad51c	0.000189327	0.000184195	6.27167	6.17808	-0.0935913	0.687997	1.14841	0.918997	-0.229409	0.485038	19.2057	18.1272	-1.07857	0.390491	24	NO CHANGE	NO CHANGE	NO CHANGE
TC0500002827.mm.2	Hnrnpd	0.000189773	0.031572	10.3038	10.3353	0.0315278	0.725761	0.471528	0.162048	-0.30948	0.0197642	10.8308	10.7881	-0.042759	0.984608	24	DOWN	NO CHANGE	NO CHANGE
TC1900000637.mm.2	Gm10768; Abcc2	0.000190664	0.0177117	12.2092	12.0645	-0.144663	0.431872	0.810044	0.488666	-0.321379	0.224597	7.62412	9.63276	2.00864	0.22895	24	NO CHANGE	NO CHANGE	NO CHANGE
TC0200004221.mm.2	Pdhx	0.000190754	0.0572016	7.8125	7.32647	-0.486032	3.43215e-05	0.460944	0.216399	-0.244545	0.106129	11.1788	12.789	1.61022	0.436477	24	NO CHANGE	NO CHANGE	DOWN
TC0200001564.mm.2	Cstf3	0.000193768	0.227464	8.36917	8.30542	-0.06375	0.608042	0.514326	0.161506	-0.352821	0.0472717	17.678	15.3964	-2.28167	0.472555	24	DOWN	NO CHANGE	NO CHANGE
TC1100003409.mm.2	Gm11437	0.000194138	0.000622694	9.84167	10.6564	0.814782	0.000522155	0.839201	1.01385	0.174649	0.575398	19.5858	21.3304	1.74467	0.175052	24	NO CHANGE	NO CHANGE	UP
TC0100002488.mm.2	Kansl1l	0.000194336	0.0207473	10.2692	9.41762	-0.851548	3.78374e-09	0.512572	0.281784	-0.230787	0.156402	5.83323	15.1142	9.28098	7.1477e-06	24	NO CHANGE	DELAY	DOWN
TC1300000020.mm.2	Akr1c19	0.000195276	0.00835353	10.3687	8.13774	-2.23101	6.3507e-17	0.654962	0.52858	-0.126382	0.586873	13.6417	12.3454	-1.29628	0.394346	24	NO CHANGE	NO CHANGE	DOWN
TC1100002062.mm.2	Narf	0.000195683	0.00057426	9.46542	9.40417	-0.0612497	0.605588	0.583349	0.429557	-0.153792	0.366111	10.0284	10.6058	0.577421	0.655675	24	NO CHANGE	NO CHANGE	NO CHANGE
TC0500000532.mm.2	Pi4k2b	0.000196124	0.847145	8.28208	9.73052	1.44843	2.70638e-14	0.460871	0.0286053	-0.432266	0.0195478	15.1539	5.1015	-10.0524	0.56906	24	DOWN	NO CHANGE	UP
TC1600000335.mm.2	St6gal1	0.000196465	0.000537807	11.1267	8.83958	-2.28708	6.42516e-15	1.01925	0.594419	-0.424831	0.125782	6.36568	7.47895	1.11328	0.440038	24	NO CHANGE	NO CHANGE	DOWN
TC0100002963.mm.2	Tmem37	0.000196973	2.46881e-08	7.55792	7.61782	0.0599008	0.483712	0.420655	0.643801	0.223145	0.0681467	16.5429	17.9176	1.37476	0.142102	24	NO CHANGE	NO CHANGE	NO CHANGE
TC0800002844.mm.2	Slc12a4	0.000197654	0.000243221	6.47042	6.86292	0.3925	0.00165989	0.498893	0.544808	0.0459158	0.781964	10.9035	13.0229	2.11941	0.0870715	24	NO CHANGE	NO CHANGE	UP
TC1100000954.mm.2	Gltpd2	0.00019768	5.53811e-05	11.3767	10.8672	-0.509444	1.46862e-07	0.363633	0.413474	0.0498412	0.666134	20.7177	20.3637	-0.353988	0.752849	24	NO CHANGE	NO CHANGE	DOWN
TC0900001419.mm.2	Prkar2a	0.000198809	0.320066	11.1163	11.4606	0.344325	0.000300886	0.405022	0.0869824	-0.318039	0.0144214	17.9592	23.1254	5.16624	0.190879	24	DOWN	NO CHANGE	UP
TC1400001695.mm.2	Dph3	0.00019918	0.0284547	8.84958	9.07569	0.226111	0.0644415	0.519088	0.285565	-0.233523	0.169807	17.2842	14.2092	-3.07498	0.103524	24	NO CHANGE	NO CHANGE	NO CHANGE
TC0300002451.mm.2	BC021767	0.000199481	0.146575	7.65458	6.82177	-0.832817	1.92298e-07	0.506305	0.229316	-0.276989	0.148242	21.3213	18.5214	-2.79994	0.263128	24	NO CHANGE	NO CHANGE	DOWN
TC1100003948.mm.2	Pitpnc1	0.000199731	0.00150621	9.94542	10.201	0.255556	0.00694979	0.415559	0.316521	-0.0990388	0.438556	11.4117	13.724	2.31227	0.100367	24	NO CHANGE	NO CHANGE	UP
TC1600002118.mm.2	Pigp	0.000200172	0.0010619	9.59542	9.65466	0.059246	0.511682	0.362533	0.381419	0.0188863	0.883067	11.8595	11.4902	-0.369268	0.776113	24	NO CHANGE	NO CHANGE	NO CHANGE
TC1100004296.mm.2	Nme1	0.000200815	0.146143	9.55333	9.4498	-0.103532	0.367043	0.467846	0.184821	-0.283025	0.0845619	18.2181	18.5768	0.358649	0.889039	24	NO CHANGE	NO CHANGE	NO CHANGE
TC1400000465.mm.2	Gm8232; Gm21991	0.000203178	0.123369	5.73417	5.6423	-0.0918651	0.591969	0.611322	0.320116	-0.291206	0.231014	1.94138	1.67648	-0.264891	0.909653	24	NO CHANGE	NO CHANGE	NO CHANGE
TC1400001177.mm.2	Lmo7	0.000204041	2.65362e-06	12.0992	12.165	0.0658333	0.506316	0.520409	0.468324	-0.0520857	0.707399	12.0642	14.3596	2.29537	0.040978	24	NO CHANGE	DELAY	NO CHANGE
TC0300002343.mm.2	Slc50a1	0.000204698	0.265689	8.79083	9.66585	0.87502	1.31205e-13	0.360036	0.0922442	-0.267791	0.0234687	17.4158	18.4206	1.00477	0.776019	24	DOWN	NO CHANGE	UP
TC0800001213.mm.2	Elmo3	0.000204924	0.00994028	7.49417	7.07883	-0.415337	0.000146585	0.431002	0.295047	-0.135956	0.341173	7.13595	8.03673	0.900787	0.564475	24	NO CHANGE	NO CHANGE	DOWN
TC0800001635.mm.2	Elavl1	0.000205298	0.280601	8.87333	8.79536	-0.0779762	0.367178	0.33209	0.104985	-0.227105	0.0650747	3.42755	2.77043	-0.657121	0.845374	24	NO CHANGE	NO CHANGE	NO CHANGE
TC0800002142.mm.2	F11	0.000206499	0.000241173	11.8317	11.4557	-0.375992	0.00146184	0.510774	0.4722	-0.0385739	0.80595	5.56732	7.18277	1.61546	0.190503	24	NO CHANGE	NO CHANGE	DOWN
TC1300002588.mm.2	Erbb2ip	0.000207604	7.61798e-06	12.6025	12.4247	-0.177778	0.0433067	0.375601	0.528771	0.15317	0.215971	7.27097	9.361	2.09003	0.0535491	24	NO CHANGE	NO CHANGE	DOWN
TC0100000135.mm.2	Gsta3	0.000207637	0.0150621	18.8079	18.7388	-0.0690873	0.1415	0.224171	0.107847	-0.116324	0.0793611	18.0246	2.43057	8.40598	4.70328e-05	24	NO CHANGE	DELAY	NO CHANGE
TC0600000180.mm.2	Ing3	0.000207932	0.0956715	8.955	8.5749	-0.380099	0.000529104	0.431326	0.181743	-0.249583	0.0853721	14.4806	14.7753	0.294658	0.901219	24	NO CHANGE	NO CHANGE	DOWN
TC0100003874.mm.2	Ankrd23	0.00020806	0.0571853	5.91	5.93425	0.024246	0.863341	0.411984	0.367888	-0.0440963	0.826803	21.4359	22.1349	0.699009	0.718496	24	NO CHANGE	NO CHANGE	NO CHANGE
TC1100001097.mm.2	Rnmtl1	0.00020817	0.0159999	5.315	5.4372	0.122202	0.28408	0.433927	0.32783	-0.106097	0.504	13.7393	15.7161	1.97675	0.244224	24	NO CHANGE	NO CHANGE	NO CHANGE
TC1300002538.mm.2	Marveld2	0.000208173	0.0585441	7.93333	7.52827	-0.40506	0.00625722	0.51773	0.328379	-0.189351	0.346664	3.53156	7.12551	3.59395	0.0716069	24	NO CHANGE	NO CHANGE	DOWN
TC0100002353.mm.2	Sf3b1	0.000208681	0.00736607	10.7267	10.6769	-0.0497619	0.52637	0.290425	0.273976	-0.0164495	0.883284	9.97152	10.5452	0.573652	0.699515	24	NO CHANGE	NO CHANGE	NO CHANGE
TC1100001133.mm.2	Myo18a	0.000209137	0.0198127	8.22125	8.14899	-0.0722618	0.436359	0.400553	0.243551	-0.157001	0.238544	7.20354	8.8864	1.68287	0.320204	24	NO CHANGE	NO CHANGE	NO CHANGE
TC0400001641.mm.2	Paqr7	0.000209441	7.53074e-06	9.99292	9.14306	-0.849861	1.19133e-07	0.603276	0.769594	0.166317	0.377819	16.5586	14.3635	-2.19513	0.0471472	24	NO CHANGE	ADVANCE	DOWN
TC1000003226.mm.2	Gstt3	0.000209514	0.197781	12.0596	16.18	4.12044	5.43651e-25	0.820531	0.236156	-0.584375	0.027464	18.0638	0.127723	6.06389	0.0518219	24	DOWN	NO CHANGE	UP
TC1200002203.mm.2	Foxn3	0.000210082	0.0149961	10.1404	10.9536	0.813194	2.86524e-10	0.489303	0.222973	-0.26633	0.061551	6.09016	6.31355	0.223398	0.905917	24	NO CHANGE	NO CHANGE	UP
TC0500001578.mm.2	Baz1b	0.000211986	0.00382409	11.1588	11.461	0.302222	0.0132364	0.479597	0.412143	-0.0674536	0.684786	14.0288	13.0494	-0.97942	0.49697	24	NO CHANGE	NO CHANGE	UP
TC0800002852.mm.2	Esrp2	0.000212135	0.193456	12.2996	11.7271	-0.57246	2.49499e-09	0.299668	0.115033	-0.184635	0.0946753	21.7791	21.4469	-0.332215	0.90105	24	NO CHANGE	NO CHANGE	DOWN
TC0400003200.mm.2	Pcsk9	0.000213132	0.18441	8.8525	9.87444	1.02194	1.12948e-09	0.542257	0.188685	-0.353571	0.0601707	12.8915	14.5966	1.70503	0.554941	24	NO CHANGE	NO CHANGE	UP
TC1000002660.mm.2	Actr6	0.000213132	0.0326654	7.69875	7.6028	-0.0959524	0.409211	0.523106	0.25506	-0.268046	0.104856	15.5149	14.2024	-1.31259	0.50506	24	NO CHANGE	NO CHANGE	NO CHANGE
TC1100001082.mm.2	Ywhae	0.000213221	0.254084	15.9179	16.1118	0.193869	0.00153256	0.271854	0.06278	-0.209074	0.0140188	6.142	8.6551	2.5131	0.482088	24	DOWN	NO CHANGE	UP
TC0700004508.mm.2	Bet1l	0.000214114	0.823183	6.03292	6.02821	-0.00470238	0.973503	0.652191	0.0311044	-0.621086	0.00363171	14.8351	9.82273	-5.01238	0.770894	24	DOWN	NO CHANGE	NO CHANGE
TC1600001373.mm.2	Tmem41a	0.000214672	0.0174085	7.0075	7.80014	0.792639	7.50813e-07	0.591848	0.353026	-0.238822	0.21591	13.7343	16.3597	2.6254	0.141282	24	NO CHANGE	NO CHANGE	UP
TC0900001005.mm.2	Fam214a	0.000216748	0.00142982	11.1008	12.2212	1.12038	4.47294e-09	0.718133	0.506265	-0.211868	0.323244	16.0465	17.0533	1.00673	0.482611	24	NO CHANGE	NO CHANGE	UP
TC0400000659.mm.2	Hsdl2	0.000216957	0.0252307	11.0587	11.3235	0.264762	0.02561	0.400585	0.328994	-0.0715918	0.660054	20.0596	13.0555	-7.00405	0.000210245	24	NO CHANGE	ADVANCE	UP
TC0200005518.mm.2	Zfp512b	0.000217497	0.000494466	8.80417	8.51137	-0.292798	0.028267	0.619079	0.489198	-0.129881	0.482407	7.28892	8.07716	0.788235	0.539838	24	NO CHANGE	NO CHANGE	DOWN
TC0700001580.mm.2	Olfml1	0.000217848	0.0149911	7.51125	7.12262	-0.388631	0.000712934	0.492165	0.269241	-0.222925	0.145287	11.4156	18.9971	7.58147	7.82535e-05	24	NO CHANGE	DELAY	DOWN
TC0500003531.mm.2	Papolb	0.00021811	0.314174	4.37208	4.25058	-0.121508	0.317878	0.405525	0.152347	-0.253178	0.146707	0.718518	11.7426	11.0241	0.00135747	24	NO CHANGE	NO CHANGE	NO CHANGE
TC0200002170.mm.2	Naa20	0.000218939	0.570523	7.9275	8.78099	0.853492	1.62572e-09	0.467868	0.0670443	-0.400824	0.0141309	15.7583	13.0181	-2.74023	0.672522	24	DOWN	NO CHANGE	UP
TC1500000659.mm.2	Nol12	0.000219552	0.303272	6.77417	6.71339	-0.0607738	0.655104	0.482572	0.171232	-0.31134	0.11393	17.3224	8.73753	-8.58487	0.00990043	24	NO CHANGE	NO CHANGE	NO CHANGE
TC0600001736.mm.2	Stk38l	0.000220412	0.226465	9.0925	9.50337	0.410873	0.00396757	0.473024	0.195	-0.278024	0.147046	14.4322	16.1484	1.71624	0.561303	24	NO CHANGE	NO CHANGE	UP
TC1200002416.mm.2	Ppp1r13b	0.000222052	0.289549	8.305	8.59512	0.290119	0.0140291	0.441874	0.139127	-0.302747	0.0669802	5.73778	11.9003	6.16252	0.0648015	24	NO CHANGE	NO CHANGE	UP
TC0300001448.mm.2	Ccbl2	0.000222621	0.0218549	14.3083	14.1281	-0.180198	0.108112	0.458272	0.283282	-0.17499	0.260631	18.8615	15.4194	-3.4421	0.059457	24	NO CHANGE	NO CHANGE	NO CHANGE
TC1200000671.mm.2	Syne2; Mir5101	0.000223447	0.0485591	7.425	6.79792	-0.627083	5.16677e-07	0.403983	0.255744	-0.148239	0.33095	11.3228	10.9475	-0.375323	0.839918	24	NO CHANGE	NO CHANGE	DOWN
TC1900000465.mm.2	Minpp1	0.000224024	0.17006	8.74792	8.72083	-0.0270833	0.739497	0.292091	0.133075	-0.159016	0.169212	10.0283	14.1865	4.1582	0.117341	24	NO CHANGE	NO CHANGE	NO CHANGE
TC1500001831.mm.2	Tst	0.000225411	0.0038201	12.115	11.4712	-0.643829	2.35302e-08	0.28323	0.391457	0.108226	0.421535	18.8239	20.6405	1.8166	0.245024	24	NO CHANGE	NO CHANGE	DOWN
TC0700002754.mm.2	Lrfn3	0.000226175	0.269298	5.9675	6.462	0.494504	0.000785464	0.554588	0.167163	-0.387425	0.0506064	21.4865	1.37369	3.88721	0.245389	24	NO CHANGE	NO CHANGE	UP
TC0Y00000565.mm.2	Gm20854	0.000226742	0.0383192	5.5475	4.39425	-1.15325	4.71992e-07	0.696684	0.490337	-0.206347	0.449061	2.83763	4.56559	1.72796	0.361728	24	NO CHANGE	NO CHANGE	DOWN
TC0400002854.mm.2	Tle1	0.000227013	5.42179e-05	10.9771	10.7745	-0.20254	0.111419	0.559286	0.621782	0.0624962	0.723479	5.20062	6.40016	1.19954	0.301305	24	NO CHANGE	NO CHANGE	NO CHANGE
TC0700000978.mm.2	Mtmr10	0.000228366	0.00109514	10.2012	9.88028	-0.320972	0.000522168	0.380083	0.328611	-0.051472	0.674514	12.6522	11.1586	-1.49365	0.256341	24	NO CHANGE	NO CHANGE	DOWN
TC1900001630.mm.2	Sh3pxd2a	0.000229554	1.14746e-05	7.83667	9.36105	1.52438	2.72462e-15	0.524585	0.750956	0.226371	0.203665	1.78443	1.64517	-0.139262	0.900166	24	NO CHANGE	NO CHANGE	UP
TC1500000599.mm.2	Adck5	0.000229618	0.421029	8.88125	6.63004	-2.25121	1.17989e-12	0.787688	0.212457	-0.575231	0.0727645	0.52905	3.80372	3.27467	0.449705	24	NO CHANGE	NO CHANGE	DOWN
TC1900000766.mm.2	Shoc2	0.000229642	0.00892639	11.5604	11.5378	-0.0226587	0.743835	0.325033	0.186978	-0.138055	0.167183	5.60919	11.5617	5.9525	0.000653546	24	NO CHANGE	DELAY	NO CHANGE
TC0700003448.mm.2	Lrrc28	0.000230146	0.000165526	10.3446	10.3895	0.0449405	0.767157	0.731689	0.603032	-0.128657	0.545544	13.9699	17.0195	3.04964	0.0195595	24	NO CHANGE	DELAY	NO CHANGE
TC0900000204.mm.2	Ldlr	0.000231033	0.0142078	10.1942	10.7523	0.558095	0.000355943	0.460482	0.463675	0.00319321	0.987359	14.4922	15.8519	1.35963	0.426974	24	NO CHANGE	NO CHANGE	UP
TC0300002836.mm.2	Rwdd3	0.000232263	0.00300982	3.3975	3.32635	-0.0711508	0.538144	0.501399	0.398314	-0.103084	0.531893	9.40937	8.65759	-0.751786	0.592062	24	NO CHANGE	NO CHANGE	NO CHANGE
TC0200000585.mm.2	Fam102a	0.000233357	3.46413e-07	7.25417	7.4598	0.205635	0.142104	0.700397	0.805956	0.10556	0.587001	13.1346	14.3649	1.2303	0.224462	24	NO CHANGE	NO CHANGE	NO CHANGE
TC0600002315.mm.2	Fkbp14	0.000234062	0.00666096	6.89667	6.74085	-0.155813	0.223889	0.557978	0.373571	-0.184407	0.302114	17.8419	16.6123	-1.22961	0.441699	24	NO CHANGE	NO CHANGE	NO CHANGE
TC0600003475.mm.2	Dennd5b	0.000237002	7.59873e-06	11.4867	11.2276	-0.259048	0.00114491	0.374194	0.368048	-0.00614596	0.95401	8.8404	9.48917	0.648761	0.546185	24	NO CHANGE	NO CHANGE	DOWN
TC0300000457.mm.2	Eif2a	0.000238065	0.14862	11.1363	11.407	0.270714	0.000750159	0.297958	0.12154	-0.176418	0.1003	9.93526	6.73683	-3.19843	0.216851	24	NO CHANGE	NO CHANGE	UP
TC0900000330.mm.2	Srpr	0.000239986	0.0418521	13.5675	13.8945	0.327044	9.37224e-07	0.261041	0.119592	-0.141448	0.0884267	9.73579	8.99736	-0.738426	0.710455	24	NO CHANGE	NO CHANGE	UP
TC1000000422.mm.2	Prep	0.00024059	0.000741793	12.2746	11.8524	-0.422143	3.26454e-07	0.33417	0.247645	-0.0865249	0.385565	12.564	12.0184	-0.545686	0.682896	24	NO CHANGE	NO CHANGE	DOWN
TC0200001366.mm.2	Psmc3	0.000241258	0.0126497	12.8208	12.8288	0.00795635	0.895797	0.174039	0.215138	0.0410987	0.636187	5.49163	9.00207	3.51044	0.0436722	24	NO CHANGE	DELAY	NO CHANGE
TC1000001374.mm.2	Mdm1	0.0002415	0.0157448	3.99083	4.34873	0.357897	0.00124815	0.298853	0.354621	0.0557681	0.707487	18.4159	22.5617	4.14581	0.0195463	24	NO CHANGE	DELAY	UP
TC1300001348.mm.2	4833420G17Rik	0.000242788	0.00835488	9.43458	9.23692	-0.197659	0.131655	0.482792	0.43687	-0.0459224	0.803649	8.29368	8.95862	0.664936	0.659935	24	NO CHANGE	NO CHANGE	NO CHANGE
TC0900001883.mm.2	Spc24	0.000242965	0.0231188	6.6475	6.1152	-0.532302	1.67579e-06	0.427528	0.231447	-0.196081	0.154869	16.814	19.6659	2.85193	0.118523	24	NO CHANGE	NO CHANGE	DOWN
TC0900003064.mm.2	Wdr6	0.000243311	0.144309	5.99417	5.46244	-0.531726	0.000127939	0.506971	0.209119	-0.297852	0.102946	7.171	7.74971	0.578711	0.817048	24	NO CHANGE	NO CHANGE	DOWN
TC0200005344.mm.2	Gm8898; Gm14431	0.000245503	0.000389576	14.4921	14.1274	-0.364722	0.000890769	0.514557	0.343454	-0.171103	0.23768	16.6716	17.5953	0.923702	0.507427	24	NO CHANGE	NO CHANGE	DOWN
TC1900000409.mm.2	Smarca2	0.000245678	0.00215637	12.3004	11.6471	-0.653274	2.25536e-05	0.678989	0.401281	-0.277708	0.157923	12.5528	13.1067	0.553962	0.717467	24	NO CHANGE	NO CHANGE	DOWN
TC1900001085.mm.2	Stxbp3-ps	0.000248188	0.002126	9.15708	9.15343	-0.00365079	0.966645	0.397925	0.284255	-0.113669	0.35417	4.90431	3.74518	-1.15913	0.431803	24	NO CHANGE	NO CHANGE	NO CHANGE
TC1500001596.mm.2	E430025E21Rik	0.000249013	0.0492786	9.6375	9.73841	0.100913	0.210004	0.295566	0.187178	-0.108387	0.335901	7.57372	5.83514	-1.73858	0.375759	24	NO CHANGE	NO CHANGE	NO CHANGE
TC0400001070.mm.2	Oma1	0.000249832	0.0428726	8.42	8.07613	-0.343869	0.00103239	0.427012	0.208774	-0.218238	0.118696	17.5275	18.1415	0.613968	0.761815	24	NO CHANGE	NO CHANGE	DOWN
TC0200002279.mm.2	Tbc1d20	0.000250343	0.00166383	8.87042	8.57954	-0.290873	0.0135529	0.480963	0.431415	-0.0495478	0.760196	7.86096	9.75062	1.88966	0.161479	24	NO CHANGE	NO CHANGE	DOWN
TC0200001624.mm.2	Bdnf	0.000250979	0.0384057	4.27667	3.40306	-0.873611	1.42573e-07	0.583804	0.315088	-0.268716	0.17413	13.9481	18.4766	4.52853	0.0231768	24	NO CHANGE	DELAY	DOWN
TC0300000453.mm.2	Tsc22d2	0.000251129	1.8293e-05	10.1767	10.2125	0.0358333	0.734613	0.477546	0.574853	0.0973076	0.520591	7.8233	9.65426	1.83096	0.0973327	24	NO CHANGE	NO CHANGE	NO CHANGE
TC0700003547.mm.2	Mrpl46	0.000252027	0.47659	6.05708	6.09718	0.0400992	0.736014	0.391373	0.105455	-0.285919	0.0968468	12.9953	11.7317	-1.26362	0.776253	24	NO CHANGE	NO CHANGE	NO CHANGE
TC1600001042.mm.2	Cbr1	0.000253011	0.0785678	10.8792	12.4707	1.59155	2.1981e-14	0.583258	0.266766	-0.316492	0.113145	16.0819	6.52125	-9.56062	9.47858e-05	24	NO CHANGE	NO CHANGE	UP
TC0200000994.mm.2	Cers6	0.000253335	0.0234854	9.14167	9.41873	0.277063	0.0724619	0.636636	0.389057	-0.247578	0.25508	9.46567	11.2254	1.75977	0.310783	24	NO CHANGE	NO CHANGE	NO CHANGE
TC0X00000973.mm.2	Gjb1	0.000253344	0.000729908	15.1392	15.089	-0.0501786	0.463186	0.298923	0.262309	-0.0366142	0.701056	2.23993	4.19337	1.95345	0.150044	24	NO CHANGE	NO CHANGE	NO CHANGE
TC0X00003301.mm.2	Reps2	0.000254011	0.65675	11.0875	10.7195	-0.367976	5.56198e-05	0.395896	0.0316324	-0.364264	0.00281261	5.81192	2.892	-2.91993	0.776398	24	DOWN	NO CHANGE	DOWN
TC1700001301.mm.2	Tmem247	0.000254478	0.0992488	3.5375	3.46637	-0.071131	0.441522	0.409932	0.157881	-0.252051	0.0610839	23.9689	21.4922	-2.47679	0.297438	24	NO CHANGE	NO CHANGE	NO CHANGE
TC0400003475.mm.2	Mfsd2a	0.000254604	0.00223076	7.82458	6.41679	-1.4078	0.00276355	1.78792	1.66124	-0.126682	0.839897	13.3821	13.5213	0.139192	0.920896	24	NO CHANGE	NO CHANGE	DOWN
TC1300002269.mm.2	Mtrr	0.000255734	1.56944e-05	6.55875	6.395	-0.16375	0.117372	0.504092	0.478783	-0.0253088	0.86066	17.0947	16.9265	-0.168185	0.883352	24	NO CHANGE	NO CHANGE	NO CHANGE
TC0500001570.mm.2	Cldn3	0.000255934	0.156112	10.425	9.6395	-0.785496	9.16693e-10	0.361497	0.171086	-0.19041	0.184767	23.0979	0.393177	1.29528	0.60136	24	NO CHANGE	NO CHANGE	DOWN
TC1100000730.mm.2	Mprip	0.000256271	0.393351	12.9429	12.9421	-0.000793652	0.99196	0.351593	0.067198	-0.284395	0.0144836	4.10413	23.9267	-4.17744	0.361264	24	DOWN	NO CHANGE	NO CHANGE
TC0700002498.mm.2	Tomm40	0.000256869	0.0147406	8.52375	8.4824	-0.0413492	0.660419	0.395249	0.253055	-0.142194	0.282941	14.7369	16.6862	1.94935	0.26045	24	NO CHANGE	NO CHANGE	NO CHANGE
TC0200002018.mm.2	Smox	0.000258361	0.00744837	6.3675	7.08387	0.716369	2.95305e-07	0.366029	0.436056	0.0700267	0.675918	1.71354	0.305904	-1.40764	0.380269	24	NO CHANGE	NO CHANGE	UP
TC0X00003308.mm.2	Txlng	0.00025982	0.165091	9.16167	8.5428	-0.618869	2.29242e-08	0.252109	0.167016	-0.085093	0.507731	16.6022	12.3791	-4.22315	0.093519	24	NO CHANGE	NO CHANGE	DOWN
TC0200003280.mm.2	Tor1a	0.000260076	0.055673	7.87458	8.5371	0.66252	1.48887e-09	0.315457	0.198168	-0.117289	0.336191	13.1632	13.5965	0.433324	0.826703	24	NO CHANGE	NO CHANGE	UP
TC0200005360.mm.2	Gm14410; Gm14411; Gm14413	0.000261384	0.000683225	12.5188	12.7785	0.259742	0.0216913	0.426654	0.477437	0.0507822	0.741996	18.291	18.2506	-0.0403873	0.975556	24	NO CHANGE	NO CHANGE	UP
TC0300002348.mm.2	Adam15	0.000262654	0.268469	4.72417	4.44137	-0.282798	0.00650194	0.412625	0.114807	-0.297817	0.036718	4.37474	4.6186	0.243859	0.944912	24	DOWN	NO CHANGE	DOWN
TC1200001813.mm.2	Sec23a	0.000262905	0.00146353	11.5333	11.2461	-0.287282	0.000105287	0.25872	0.280889	0.0221685	0.818036	12.6054	9.91167	-2.69372	0.0489869	24	NO CHANGE	ADVANCE	DOWN
TC0900001785.mm.2	4931406C07Rik	0.000264696	0.885535	14.2921	14.6413	0.349187	3.79705e-05	0.347447	0.0101348	-0.337312	0.00271774	17.4747	4.2993	10.8246	0.715365	24	DOWN	NO CHANGE	UP
TC0700004148.mm.2	Sox6	0.000265796	0.000813759	7.84083	8.11823	0.277401	0.00879171	0.333905	0.483431	0.149527	0.301761	7.2176	7.46239	0.244793	0.861403	24	NO CHANGE	NO CHANGE	UP
TC1600001378.mm.2	Tra2b	0.000267038	0.0616618	11.9429	11.9605	0.0175397	0.846832	0.390931	0.183927	-0.207004	0.116163	20.6009	21.261	0.660063	0.749058	24	NO CHANGE	NO CHANGE	NO CHANGE
TC1400000910.mm.2	Pinx1	0.000267112	0.00957886	7.44167	7.537	0.0953373	0.454968	0.561275	0.352403	-0.208872	0.247429	17.7887	18.3196	0.530899	0.747061	24	NO CHANGE	NO CHANGE	NO CHANGE
TC0400002434.mm.2	Ddx58	0.00026832	0.000365913	8.78	9.9678	1.1878	1.41749e-13	0.327663	0.604867	0.277204	0.0851225	4.9171	21.4834	-7.43366	6.63975e-06	24	NO CHANGE	ADVANCE	UP
TC0300000623.mm.2	Ppid	0.000268469	0.00164008	11.3812	11.2799	-0.101329	0.411753	0.498981	0.465869	-0.0331112	0.847694	16.6636	17.4107	0.747136	0.592297	24	NO CHANGE	NO CHANGE	NO CHANGE
TC1500002075.mm.2	Abcd2	0.000268851	3.96411e-05	8.53833	11.8255	3.28714	1.68515e-18	1.0386	1.00378	-0.0348273	0.910495	8.49636	9.06803	0.571676	0.615266	24	NO CHANGE	NO CHANGE	UP
TC1200001364.mm.2	Fam228b	0.000270206	0.0141205	6.21917	5.58407	-0.635099	5.24962e-07	0.480536	0.276752	-0.203784	0.184478	20.7804	18.7698	-2.01063	0.248114	24	NO CHANGE	NO CHANGE	DOWN
TC0500003371.mm.2	Gtf2ird1	0.000271069	0.200803	7.71417	6.76756	-0.946607	4.3218e-08	0.566714	0.198271	-0.368443	0.0697823	1.18142	5.29892	4.1175	0.170821	24	NO CHANGE	NO CHANGE	DOWN
TC1100002575.mm.2	Adra1b	0.000271238	0.000281878	9.24	10.1775	0.9375	1.68045e-09	0.548878	0.514115	-0.0347632	0.841029	22.2261	0.795135	2.569	0.0441987	24	NO CHANGE	DELAY	UP
TC1700000513.mm.2	Zfand3	0.000271801	6.21211e-05	11.315	11.9474	0.632381	8.87273e-11	0.282748	0.415726	0.132978	0.209046	8.24217	8.19644	-0.0457295	0.969411	24	NO CHANGE	NO CHANGE	UP
TC0600001375.mm.2	Gm10319	0.000272853	0.749585	14.0367	12.6555	-1.38117	5.70748e-16	0.304991	0.0441353	-0.260856	0.0925431	1.60159	1.54985	-0.051735	0.995709	24	NO CHANGE	NO CHANGE	DOWN
TC0400002531.mm.2	Gba2	0.000273025	0.00366685	5.45917	6.11006	0.650893	9.84611e-05	0.619503	0.529599	-0.0899041	0.676783	10.6845	12.3978	1.71336	0.237155	24	NO CHANGE	NO CHANGE	UP
TC1100004284.mm.2	Afmid	0.00027346	0.00571665	13.0258	12.8731	-0.152738	0.21021	0.514225	0.383649	-0.130575	0.449525	18.6736	20.4175	1.74387	0.245581	24	NO CHANGE	NO CHANGE	NO CHANGE
TC1600001747.mm.2	Trmt10c	0.000277169	0.0992678	8.00875	7.69367	-0.315079	0.0020288	0.367713	0.179787	-0.187927	0.167087	18.7622	15.8815	-2.88069	0.221095	24	NO CHANGE	NO CHANGE	DOWN
TC0700000806.mm.2	Josd2; Mir7052	0.000277387	0.0117275	8.65792	9.73413	1.07621	2.32939e-11	0.441157	0.380488	-0.0606694	0.721641	20.9105	20.5918	-0.318759	0.839007	24	NO CHANGE	NO CHANGE	UP
TC0100001522.mm.2	Adcy10	0.000278193	0.0517189	4.18917	7.73744	3.54827	2.97347e-16	0.512106	0.752282	0.240176	0.529062	3.14761	4.19745	1.04984	0.670488	24	NO CHANGE	NO CHANGE	UP
TC1700001145.mm.2	Ypel5	0.000278641	0.023895	11.6287	11.3852	-0.243571	0.0312458	0.434038	0.296153	-0.137885	0.382192	9.33614	9.279	-0.057148	0.973141	24	NO CHANGE	NO CHANGE	DOWN
TC1600001395.mm.2	Masp1	0.000280061	0.00492899	13.4554	13.9008	0.445377	1.01531e-10	0.219892	0.170793	-0.0490996	0.51031	7.1979	8.75121	1.55331	0.291681	24	NO CHANGE	NO CHANGE	UP
TC1400002023.mm.2	Hnrnpc	0.000280445	0.000194311	12.3479	12.3122	-0.035754	0.680692	0.420426	0.331104	-0.0893225	0.467212	19.5218	18.6204	-0.901365	0.483173	24	NO CHANGE	NO CHANGE	NO CHANGE
TC1600000958.mm.2	Bach1	0.000282444	0.0859092	9.73875	8.79099	-0.947758	2.34703e-10	0.522634	0.193864	-0.32877	0.0486992	6.73774	12.0278	5.29002	0.0323806	24	DOWN	NO CHANGE	DOWN
TC0700000997.mm.2	Lins1	0.000284045	0.0106543	5.39958	5.73429	0.334702	0.0011303	0.407099	0.27218	-0.13492	0.321809	16.7237	18.2056	1.48189	0.36891	24	NO CHANGE	NO CHANGE	UP
TC1900001390.mm.2	Sgms1	0.000285628	0.000511956	5.80792	6.32563	0.517718	0.00254876	0.714904	0.65499	-0.0599145	0.794794	8.85304	7.81155	-1.0415	0.416375	24	NO CHANGE	NO CHANGE	UP
TC1300001419.mm.2	Gtpbp4	0.000286307	0.000445536	10.7575	10.3145	-0.443036	0.000274114	0.457671	0.486807	0.0291353	0.85324	14.2532	13.9644	-0.288757	0.822741	24	NO CHANGE	NO CHANGE	DOWN
TC0300003077.mm.2	Sh3glb1	0.000286954	8.40148e-05	12.3613	13.2406	0.879306	3.19595e-16	0.266276	0.359875	0.093599	0.331168	11.1564	12.8034	1.64707	0.175381	24	NO CHANGE	NO CHANGE	UP
TC1000002258.mm.2	Supv3l1	0.000287569	0.0106519	7.07125	6.95415	-0.117103	0.305751	0.503201	0.308494	-0.194707	0.229996	13.3838	12.8847	-0.499083	0.763376	24	NO CHANGE	NO CHANGE	NO CHANGE
TC1500001955.mm.2	Cyp2d40	0.00028775	0.0225846	14.1979	13.2244	-0.973552	1.51059e-17	0.245052	0.195965	-0.0490878	0.613865	16.7517	19.6623	2.91058	0.093174	24	NO CHANGE	NO CHANGE	DOWN
TC1100001425.mm.2	Spag9	0.000288438	0.0783151	8.88917	8.29937	-0.589802	1.08155e-06	0.345477	0.234887	-0.11059	0.457671	9.92818	9.81215	-0.116037	0.954109	24	NO CHANGE	NO CHANGE	DOWN
TC0200004543.mm.2	Trpm7	0.000288782	3.96186e-05	12.1254	12.0445	-0.0809325	0.392969	0.479032	0.379685	-0.0993469	0.462878	8.98089	9.53418	0.55329	0.644378	24	NO CHANGE	NO CHANGE	NO CHANGE
TC1400000877.mm.2	Rnaseh2b	0.0002893	0.00360253	6.31	5.90978	-0.400218	0.0112467	0.610637	0.519005	-0.0916317	0.666177	14.9115	15.2967	0.385216	0.795548	24	NO CHANGE	NO CHANGE	DOWN
TC1100001051.mm.2	Tsr1	0.000289526	0.341468	7.56333	7.65405	0.0907143	0.437061	0.52481	0.103969	-0.420841	0.012743	14.1892	16.1137	1.92456	0.669043	24	DOWN	NO CHANGE	NO CHANGE
TC1100002654.mm.2	Btnl9	0.000289743	0.00811588	4.14042	4.51476	0.374345	0.00901857	0.579372	0.403082	-0.17629	0.362371	17.5086	17.3501	-0.158473	0.921644	24	NO CHANGE	NO CHANGE	UP
TC0800002144.mm.2	Klkb1; Cyp4v3	0.000290607	2.65035e-07	15.4812	15.1037	-0.37754	2.31621e-07	0.268725	0.458363	0.189638	0.0345354	6.79562	7.96214	1.16651	0.248381	24	UP	NO CHANGE	DOWN
TC1100001886.mm.2	Slc9a3r1	0.000293111	0.000139582	12.5017	12.7177	0.216032	0.00502855	0.353413	0.283416	-0.0699969	0.495791	13.0302	16.2301	3.19991	0.0164765	24	NO CHANGE	DELAY	UP
TC1400001741.mm.2	Ccser2	0.000293645	0.163904	8.385	8.88756	0.50256	1.89976e-05	0.493576	0.12924	-0.364336	0.0161859	14.4029	16.1144	1.7115	0.604039	24	DOWN	NO CHANGE	UP
TC1200000502.mm.2	Mia2	0.000293843	2.20802e-05	12.8079	12.4033	-0.404603	1.83257e-06	0.34251	0.365795	0.0232841	0.824128	11.0181	9.59986	-1.4182	0.204248	24	NO CHANGE	NO CHANGE	DOWN
TC1500002183.mm.2	Rnd1	0.000293938	0.000304587	7.68542	7.84087	0.155456	0.393788	0.86563	0.693765	-0.171864	0.508744	22.2518	22.76	0.508199	0.688625	24	NO CHANGE	NO CHANGE	NO CHANGE
TC0700000513.mm.2	Hnrnpl	0.000294555	8.79087e-05	11.01	11.0142	0.00416667	0.966782	0.380532	0.53669	0.156157	0.271116	6.09418	6.21584	0.121652	0.921236	24	NO CHANGE	NO CHANGE	NO CHANGE
TC0600000012.mm.2	Casd1	0.000294741	0.0201572	10.4871	10.5152	0.0281548	0.693865	0.283212	0.194334	-0.0888778	0.382413	1.46289	7.35344	5.89055	0.00122182	24	NO CHANGE	DELAY	NO CHANGE
TC0800001247.mm.2	Prmt7	0.000295018	0.117477	9.01292	8.98232	-0.0305952	0.739641	0.35086	0.16655	-0.18431	0.162117	18.0471	19.1871	1.13994	0.627888	24	NO CHANGE	NO CHANGE	NO CHANGE
TC0600001530.mm.2	Clec2d	0.000295287	0.00650091	16.1983	16.4543	0.256012	0.0133854	0.457644	0.272175	-0.18547	0.189295	15.6203	17.5883	1.96798	0.238279	24	NO CHANGE	NO CHANGE	UP
TC1300000070.mm.2	Heatr1	0.000297616	0.0218917	8.28625	8.52038	0.234127	0.119872	0.609697	0.375084	-0.234613	0.262005	15.0532	16.9116	1.85842	0.307278	24	NO CHANGE	NO CHANGE	NO CHANGE
TC1100004299.mm.2	Mif4gd	0.000298368	0.0427002	9.87583	9.38085	-0.49498	0.000394445	0.622045	0.236139	-0.385906	0.0400383	20.8435	19.5613	-1.28223	0.567579	24	DOWN	NO CHANGE	DOWN
TC0900002038.mm.2	Ei24	0.000298519	0.0555993	13.2729	12.9753	-0.297659	1.11571e-05	0.249024	0.12728	-0.121744	0.159391	0.0702829	20.7886	-3.28168	0.106697	24	NO CHANGE	NO CHANGE	DOWN
TC0800002300.mm.2	Palld	0.000298659	0.00767981	11.1879	10.8215	-0.366429	0.0908738	1.00601	0.555555	-0.450454	0.141998	18.6999	19.9071	1.20717	0.470924	24	NO CHANGE	NO CHANGE	NO CHANGE
TC1700001150.mm.2	Lclat1	0.000299007	0.0475011	11.3583	11.0059	-0.352421	0.000373746	0.394834	0.194913	-0.199921	0.131723	7.75798	9.63172	1.87374	0.345574	24	NO CHANGE	NO CHANGE	DOWN
TC0900002936.mm.2	Nck1	0.000300122	0.0958667	8.97875	9.15942	0.180675	0.0359641	0.326823	0.155465	-0.171357	0.148976	15.5705	15.427	-0.143507	0.951056	24	NO CHANGE	NO CHANGE	UP
TC1000001084.mm.2	Arl1	0.000300401	0.00276823	14.0871	14.3043	0.217202	0.000884737	0.248187	0.216276	-0.0319104	0.710548	13.5771	13.5051	-0.0719681	0.959992	24	NO CHANGE	NO CHANGE	UP
TC1400000366.mm.2	Gm5460	0.000303166	0.313187	2.9025	2.82252	-0.0799802	0.488267	0.328006	0.149204	-0.178802	0.273675	21.5197	18.4081	-3.11157	0.34537	24	NO CHANGE	NO CHANGE	NO CHANGE
TC0500003728.mm.2	D5Ertd579e	0.000303353	0.000283853	10.7733	10.935	0.161706	0.200416	0.518763	0.555291	0.0365288	0.835087	14.0266	14.4133	0.38675	0.760488	24	NO CHANGE	NO CHANGE	NO CHANGE
TC0700000565.mm.2	Arhgap33os	0.000307158	0.306333	4.1675	3.9879	-0.179603	0.0744358	0.349619	0.11692	-0.232699	0.0974779	3.28569	15.3972	-11.8885	0.00143218	24	NO CHANGE	NO CHANGE	NO CHANGE
TC1400001438.mm.2	Acox2	0.000308548	0.694927	11.7567	10.5823	-1.1744	2.62769e-14	0.406387	0.0433485	-0.363039	0.0155533	0.0744151	16.1784	-7.89603	0.406994	24	DOWN	NO CHANGE	DOWN
TC0200004819.mm.2	Gm10750	0.000311366	0.246904	3.42125	3.33363	-0.087619	0.281802	0.324488	0.103356	-0.221132	0.0602809	0.97686	23.6807	-1.2962	0.678387	24	NO CHANGE	NO CHANGE	NO CHANGE
TC0800000889.mm.2	Gypa	0.000311857	0.333079	4.05583	4.11113	0.0552976	0.707465	0.569028	0.157608	-0.41142	0.0524417	16.5925	18.205	1.61245	0.669309	24	NO CHANGE	NO CHANGE	NO CHANGE
TC0200002749.mm.2	Gm14403	0.000312452	6.86977e-05	13.8421	13.2195	-0.622579	0.000333786	0.689263	0.77047	0.081207	0.716745	13.936	15.6455	1.70947	0.159384	24	NO CHANGE	NO CHANGE	DOWN
TC1600000168.mm.2	Mpv17l	0.000315516	0.00113026	9.91417	9.75865	-0.155516	0.350717	0.587511	0.732417	0.144906	0.539642	15.3412	19.9452	4.60399	0.00161918	24	NO CHANGE	DELAY	NO CHANGE
TC0800002529.mm.2	Gab1	0.000315621	0.000177019	7.08125	6.92145	-0.159802	0.15394	0.462833	0.519096	0.0562632	0.720183	10.5078	12.5615	2.05374	0.0977253	24	NO CHANGE	NO CHANGE	NO CHANGE
TC0500000263.mm.2	Rbm33	0.000316449	9.67548e-05	10.3687	10.422	0.0532143	0.53148	0.406469	0.34611	-0.060359	0.615452	7.27119	7.00132	-0.269872	0.826656	24	NO CHANGE	NO CHANGE	NO CHANGE
TC1100004250.mm.2	Wdr45b	0.000317347	0.386385	8.66542	8.13034	-0.535079	2.91971e-07	0.371898	0.0770719	-0.294826	0.0208864	8.93365	14.3514	5.41771	0.239107	24	DOWN	NO CHANGE	DOWN
TC1100003106.mm.2	Slc25a11	0.000318788	0.44129	13.71	13.8056	0.0955952	0.388622	0.535783	0.071	-0.464783	0.00464854	14.7824	12.915	-1.86739	0.757754	24	DOWN	NO CHANGE	NO CHANGE
TC1000002383.mm.2	Gstt1	0.000318967	0.0205263	13.82	16.6636	2.84363	2.25565e-28	0.443672	0.246378	-0.197294	0.173545	17.8508	17.8289	-0.0219279	0.990484	24	NO CHANGE	NO CHANGE	UP
TC1000000150.mm.2	Map7	0.000320349	0.743146	8.43375	7.72504	-0.70871	8.22908e-12	0.299566	0.0273216	-0.272244	0.0151467	23.9203	23.232	-0.688271	0.947995	24	DOWN	NO CHANGE	DOWN
TC0700004628.mm.2	Prr14	0.000321722	0.00207367	12.1421	12.3812	0.239107	0.00735011	0.404524	0.255197	-0.149327	0.217734	4.1653	1.82865	-2.33664	0.131419	24	NO CHANGE	NO CHANGE	UP
TC1200001253.mm.2	Aspg	0.000321763	0.00098581	10.7767	10.9061	0.129425	0.195173	0.384419	0.407124	0.0227054	0.870185	6.28712	5.85356	-0.433557	0.749804	24	NO CHANGE	NO CHANGE	NO CHANGE
TC1500000725.mm.2	Aco2	0.000323098	0.0168509	11.0437	11.8052	0.761429	1.20808e-08	0.454598	0.27938	-0.175218	0.251524	14.0303	14.2907	0.260333	0.882409	24	NO CHANGE	NO CHANGE	UP
TC1400002430.mm.2	Slc25a30	0.000323334	0.0279379	8.60292	10.6775	2.07458	5.52587e-08	1.14768	0.846648	-0.301028	0.500912	2.90188	7.25654	4.35467	0.0174086	24	NO CHANGE	DELAY	UP
TC0100003323.mm.2	Ralgps2	0.000323575	7.52294e-05	9.38833	9.832	0.443671	0.000128562	0.45796	0.516329	0.0583698	0.697923	7.37162	8.10232	0.730705	0.532836	24	NO CHANGE	NO CHANGE	UP
TC0200002814.mm.2	Ppdpf	0.000325598	0.0103426	12.5887	12.4824	-0.106369	0.287278	0.343008	0.334765	-0.00824372	0.953708	21.662	21.9835	0.321513	0.837181	24	NO CHANGE	NO CHANGE	NO CHANGE
TC1300001173.mm.2	Adamts6	0.000328512	0.19846	3.85125	3.68278	-0.168472	0.355852	0.778369	0.234245	-0.544125	0.0375596	6.65126	5.61492	-1.03634	0.743404	24	DOWN	NO CHANGE	NO CHANGE
TC1100001369.mm.2	Mrps23	0.000329899	0.505907	7.89583	7.89097	-0.00486111	0.959054	0.286598	0.0799252	-0.206672	0.129988	13.5469	12.1461	-1.40081	0.765818	24	NO CHANGE	NO CHANGE	NO CHANGE
TC0X00001797.mm.2	Rbm3	0.000330439	0.0100215	11.1367	10.48	-0.656687	3.79132e-05	0.554024	0.450554	-0.10347	0.613698	11.6259	10.0795	-1.5464	0.319817	24	NO CHANGE	NO CHANGE	DOWN
TC1500001102.mm.2	Pcbp2	0.000334497	0.000172234	13.8142	13.8005	-0.0136905	0.845506	0.294617	0.332687	0.0380699	0.704906	9.32283	9.43448	0.111654	0.926043	24	NO CHANGE	NO CHANGE	NO CHANGE
TC0100003513.mm.2	Atf6	0.000335572	0.00361349	12.0387	11.5898	-0.448909	9.01834e-07	0.265602	0.307353	0.0417515	0.708287	9.50041	11.5099	2.00952	0.177461	24	NO CHANGE	NO CHANGE	DOWN
TC0X00000216.mm.2	Araf	0.000335682	0.0110299	10.9783	10.905	-0.0733333	0.36521	0.344566	0.219379	-0.125187	0.272026	8.83811	5.71071	-3.1274	0.0695546	24	NO CHANGE	NO CHANGE	NO CHANGE
TC0500001975.mm.2	Gm17019	0.000336784	0.0963538	3.82292	3.53692	-0.285992	0.0451858	0.474935	0.28231	-0.192625	0.328881	2.31378	1.71051	-0.603273	0.785717	24	NO CHANGE	NO CHANGE	DOWN
TC0700003790.mm.2	Uvrag	0.000336991	9.13012e-05	10.1992	10.4104	0.21123	0.0143158	0.325925	0.439356	0.113431	0.340277	10.2878	11.8114	1.52354	0.209515	24	NO CHANGE	NO CHANGE	UP
TC1800001153.mm.2	Brd8	0.000337137	0.580166	8.2675	8.40079	0.133294	0.242535	0.438621	0.0700763	-0.368545	0.0269556	3.31416	22.873	-4.44114	0.474094	24	DOWN	NO CHANGE	NO CHANGE
TC1400002490.mm.2	Naa16	0.000338204	0.0743833	8.48167	8.41966	-0.062004	0.543764	0.448531	0.179303	-0.269228	0.0649452	14.8805	17.3541	2.47364	0.30429	24	NO CHANGE	NO CHANGE	NO CHANGE
TC1000000626.mm.2	Jmjd1c	0.000339358	0.00314645	10.0104	10.3125	0.302083	0.00105605	0.394469	0.265565	-0.128903	0.298515	21.2189	22.9438	1.72492	0.247803	24	NO CHANGE	NO CHANGE	UP
TC1900000343.mm.2	Gm3443	0.000343152	0.625568	4.73917	4.40351	-0.335655	0.0303948	0.575053	0.0830907	-0.491962	0.0265822	22.8999	22.9044	0.00445653	0.999487	24	DOWN	NO CHANGE	DOWN
TC0600001589.mm.2	Borcs5	0.000343413	0.394881	6.42042	6.42276	0.00234127	0.983162	0.463693	0.0984604	-0.365233	0.0249558	18.3572	8.10316	-10.2541	0.0237538	24	DOWN	NO CHANGE	NO CHANGE
TC0500000075.mm.2	Gm6460	0.000346001	0.0689148	5.18458	4.83938	-0.345198	0.0456935	0.553551	0.388084	-0.165467	0.490001	2.94587	0.532711	-2.41316	0.237672	24	NO CHANGE	NO CHANGE	DOWN
TC0700001715.mm.2	Acsm3	0.000347936	0.000469639	12.895	11.6509	-1.24413	1.41477e-16	0.410925	0.363223	-0.0477011	0.715814	14.0805	14.6028	0.52228	0.69378	24	NO CHANGE	NO CHANGE	DOWN
TC1300001789.mm.2	Pxdc1	0.00034814	0.00127995	10.5346	10.8524	0.317817	0.0863612	0.667248	0.779942	0.112694	0.665193	22.4139	22.7434	0.329446	0.808102	24	NO CHANGE	NO CHANGE	NO CHANGE
TC1500002056.mm.2	Arsa	0.000348425	0.11802	7.34042	5.02278	-2.31764	5.39804e-17	0.713812	0.277119	-0.436693	0.0744386	7.40224	12.3547	4.95243	0.0533426	24	NO CHANGE	NO CHANGE	DOWN
TC1900001512.mm.2	Rrp12	0.000349483	0.0237897	5.63917	5.8223	0.183135	0.293925	0.718468	0.422272	-0.296196	0.226582	16.6972	14.8325	-1.86468	0.31753	24	NO CHANGE	NO CHANGE	NO CHANGE
TC0900000132.mm.2	Chordc1	0.000350907	0.000548437	10.0925	10.8536	0.761071	0.000513818	0.936733	0.726947	-0.209786	0.463474	17.2417	17.8125	0.570822	0.676302	24	NO CHANGE	NO CHANGE	UP
TC1400001687.mm.2	Ankrd28	0.000351986	0.0907951	8.12792	7.92373	-0.204187	0.00893098	0.286382	0.141715	-0.144667	0.172153	13.1162	16.9753	3.85914	0.0992974	24	NO CHANGE	NO CHANGE	DOWN
TC1500000417.mm.2	D15Ertd621e	0.000352254	0.000172341	11.8108	11.4882	-0.322639	1.83719e-05	0.309903	0.276591	-0.0333113	0.728095	10.3295	9.26797	-1.06156	0.388951	24	NO CHANGE	NO CHANGE	DOWN
TC1900000527.mm.2	44260	0.000353045	0.0243808	11.5521	11.6256	0.0735316	0.391966	0.275584	0.255201	-0.0203837	0.867578	10.5319	10.7062	0.174278	0.91955	24	NO CHANGE	NO CHANGE	NO CHANGE
TC1700000091.mm.2	T; t	0.000353509	0.197676	5.1375	4.90563	-0.231865	0.0113137	0.347923	0.121244	-0.226679	0.0707519	18.0238	4.0125	9.98873	0.00185959	24	NO CHANGE	NO CHANGE	DOWN
TC0300000494.mm.2	Arhgef26	0.000353597	0.0054675	8.34833	7.92631	-0.422024	0.00738119	0.561016	0.530317	-0.0306997	0.886565	8.83213	9.07615	0.244019	0.868837	24	NO CHANGE	NO CHANGE	DOWN
TC0500002284.mm.2	Slc2a9	0.000354738	0.0123145	9.45292	8.72786	-0.72506	2.42065e-06	0.638509	0.306901	-0.331608	0.086857	10.3762	11.3004	0.924205	0.613479	24	NO CHANGE	NO CHANGE	DOWN
TC0100003351.mm.2	Cacybp	0.000354784	0.00837467	9.81458	10.11	0.295417	0.060788	0.699448	0.405053	-0.294395	0.179915	16.4653	18.3066	1.84124	0.282163	24	NO CHANGE	NO CHANGE	NO CHANGE
TC0600001450.mm.2	Mrpl51	0.000355988	0.392446	11.5779	11.7279	0.14994	0.0180641	0.273934	0.0487239	-0.22521	0.0117594	13.4649	14.4455	0.98064	0.844668	24	DOWN	NO CHANGE	UP
TC1100003667.mm.2	Fbxl20	0.000356225	4.9182e-05	8.93208	8.52748	-0.404603	0.00490163	0.630327	0.621768	-0.00855944	0.964705	5.58809	6.89965	1.31155	0.27072	24	NO CHANGE	NO CHANGE	DOWN
TC0500002486.mm.2	Ugdh	0.00035759	0.00817943	14.0433	13.1825	-0.860833	1.33705e-07	0.398427	0.499908	0.10148	0.59967	9.38854	7.32797	-2.06057	0.219587	24	NO CHANGE	NO CHANGE	DOWN
TC0100003664.mm.2	Psen2	0.000357928	0.000369493	11.5788	11.2994	-0.279306	0.147177	0.820314	0.803424	-0.0168905	0.950429	22.3804	22.9782	0.597874	0.633681	24	NO CHANGE	NO CHANGE	NO CHANGE
TC0700002876.mm.2	Ccne1	0.000360506	0.000117884	6.10167	6.61681	0.515139	0.000741418	0.663559	0.594122	-0.0694378	0.732297	10.0997	11.2323	1.13255	0.353938	24	NO CHANGE	NO CHANGE	UP
TC0300003250.mm.2	Slc35a3	0.000360867	0.00891843	10.9833	10.7337	-0.249623	0.00857742	0.33628	0.297085	-0.0391949	0.762294	12.7913	8.19882	-4.59248	0.00483386	24	NO CHANGE	ADVANCE	DOWN
TC1100002046.mm.2	Hmga1-rs1	0.000361583	0.179811	6.78	6.64591	-0.134087	0.353416	0.616746	0.197008	-0.419738	0.0453608	8.43707	11.8642	3.42711	0.244235	24	DOWN	NO CHANGE	NO CHANGE
TC0200005383.mm.2	Zfp931	0.000366155	0.000235518	11.9729	11.8586	-0.114345	0.237776	0.461276	0.342527	-0.118749	0.379867	16.0863	17.3332	1.24697	0.359371	24	NO CHANGE	NO CHANGE	NO CHANGE
TC0500002650.mm.2	Noa1	0.000367215	0.000483915	6.41042	6.00105	-0.409365	0.000288867	0.48749	0.363597	-0.123893	0.39836	15.2075	14.0722	-1.1353	0.411683	24	NO CHANGE	NO CHANGE	DOWN
TC1300000460.mm.2	Gcnt2	0.000367708	0.0268062	9.36792	9.19222	-0.175694	0.287413	0.679866	0.387038	-0.292828	0.206078	7.19101	15.5162	8.32521	7.59563e-05	24	NO CHANGE	DELAY	NO CHANGE
TC0200000532.mm.2	Fam73b	0.00036794	0.698801	7.13292	7.05101	-0.0819048	0.534538	0.546871	0.0517945	-0.495076	0.0104811	16.5108	18.6648	2.15401	0.827722	24	DOWN	NO CHANGE	NO CHANGE
TC1700002317.mm.2	Mydgf	0.000369948	0.154859	10.2667	10.5745	0.307857	0.00234535	0.342851	0.161172	-0.181679	0.185111	19.2525	0.24841	4.99591	0.0510182	24	NO CHANGE	NO CHANGE	UP
TC0800000704.mm.2	Ints10	0.000370947	0.0332712	7.25625	7.31512	0.058869	0.638648	0.376749	0.359428	-0.0173207	0.922848	20.241	21.023	0.782086	0.667787	24	NO CHANGE	NO CHANGE	NO CHANGE
TC0500001719.mm.2	Slc29a4	0.000371605	0.23461	3.08458	3.23589	0.15131	0.181466	0.368059	0.166516	-0.201543	0.212651	21.542	22.4147	0.872659	0.754417	24	NO CHANGE	NO CHANGE	NO CHANGE
TC0700004473.mm.2	Mapk1ip1	0.000371811	0.214374	7.34583	7.05127	-0.294563	0.00898978	0.394155	0.157995	-0.23616	0.131006	5.64982	23.2801	-6.36977	0.0269847	24	NO CHANGE	NO CHANGE	DOWN
TC1900000127.mm.2	Ppp1r14b	0.000373475	0.343567	7.3225	7.93722	0.614722	0.000978322	0.594317	0.197712	-0.396605	0.113684	15.0282	12.5927	-2.43547	0.495467	24	NO CHANGE	NO CHANGE	UP
TC1300002553.mm.2	Pik3r1	0.000374089	7.45131e-05	12.0596	12.4957	0.436151	0.00358538	0.596553	0.686732	0.0901785	0.650496	13.5321	14.9978	1.46572	0.230966	24	NO CHANGE	NO CHANGE	UP
TC1900001498.mm.2	Blnk	0.000375561	0.0391054	5.73833	7.11849	1.38016	6.15389e-10	0.543172	0.470083	-0.0730889	0.767202	10.2845	11.492	1.2075	0.513961	24	NO CHANGE	NO CHANGE	UP
TC1300001374.mm.2	Net1	0.000375785	0.00208591	12.5054	11.9006	-0.604821	1.07032e-07	0.412432	0.325389	-0.0870432	0.521455	22.7262	22.3904	-0.33583	0.810453	24	NO CHANGE	NO CHANGE	DOWN
TC1000000656.mm.2	Rhobtb1	0.000375902	0.324203	10.0279	10.0767	0.0488294	0.746511	0.745741	0.112687	-0.633054	0.00435464	18.5826	15.8358	-2.74677	0.60805	24	DOWN	NO CHANGE	NO CHANGE
TC0300000060.mm.2	Fabp5	0.000376108	0.0119742	9.48208	11.7474	2.26534	6.4463e-09	1.14018	0.946133	-0.194046	0.657502	6.0677	3.55216	-2.51554	0.136293	24	NO CHANGE	NO CHANGE	UP
TC1400000810.mm.2	Mphosph8	0.000376202	0.0173711	8.59292	8.78577	0.192857	0.0599927	0.400121	0.26603	-0.13409	0.341786	16.932	15.4641	-1.46796	0.407254	24	NO CHANGE	NO CHANGE	NO CHANGE
TC1200001816.mm.2	Fbxo33	0.000376658	0.143028	7.30708	7.68813	0.381052	0.00149794	0.510213	0.151082	-0.359131	0.0269658	14.3625	16.4333	2.0708	0.499731	24	DOWN	NO CHANGE	UP
TC0500003184.mm.2	Ptpn11	0.000376771	0.0216745	8.49125	8.54808	0.0568254	0.392197	0.295188	0.154753	-0.140435	0.142798	11.5352	10.3031	-1.23203	0.499974	24	NO CHANGE	NO CHANGE	NO CHANGE
TC1300000694.mm.2	Smad5	0.000377001	0.305469	10.3625	10.5317	0.169206	0.0357117	0.329094	0.0801108	-0.248983	0.0275271	8.01934	15.4857	7.46635	0.0652827	24	DOWN	NO CHANGE	UP
TC0400002159.mm.2	Tox	0.000380087	0.00128125	7.09167	6.89218	-0.199484	0.215108	0.636397	0.634717	-0.00168049	0.99411	9.30308	8.92619	-0.376896	0.778842	24	NO CHANGE	NO CHANGE	NO CHANGE
TC0400003253.mm.2	Zfyve9	0.000382224	0.00827299	8.01208	7.89325	-0.118829	0.147111	0.370305	0.206536	-0.163769	0.154705	13.6496	14.171	0.521393	0.764695	24	NO CHANGE	NO CHANGE	NO CHANGE
TC0800002056.mm.2	Cldn23	0.000386325	0.457293	3.04167	3.18661	0.14494	0.164409	0.360781	0.0900475	-0.270733	0.0695102	22.4057	0.463198	2.05748	0.64955	24	NO CHANGE	NO CHANGE	NO CHANGE
TC0100001909.mm.2	Mrpl15	0.00038666	0.401	9.02208	8.66897	-0.353115	0.00284408	0.408111	0.10872	-0.299392	0.0657155	15.8401	23.8459	8.00584	0.0539606	24	NO CHANGE	NO CHANGE	DOWN
TC1900000517.mm.2	Pcgf5	0.000387008	0.00267606	7.79917	7.705	-0.0941667	0.361676	0.351699	0.402937	0.0512376	0.722675	11.8597	14.1779	2.31826	0.124404	24	NO CHANGE	NO CHANGE	NO CHANGE
TC1400000829.mm.2	Fgf9	0.000389403	0.572592	4.49958	4.43839	-0.0611905	0.508144	0.398319	0.0514166	-0.346903	0.0112241	21.3463	8.3987	11.0524	0.113697	24	DOWN	NO CHANGE	NO CHANGE
TC0600000591.mm.2	Mpp6	0.00039104	0.0638045	11.2833	10.9638	-0.319484	2.30146e-05	0.281815	0.129063	-0.152752	0.111291	19.8079	14.4331	-5.37477	0.0201088	24	NO CHANGE	NO CHANGE	DOWN
TC1100002894.mm.2	Flii	0.000392459	0.00135822	8.7875	8.57077	-0.216726	0.00323135	0.280722	0.271178	-0.00954376	0.923401	5.65587	8.21811	2.56224	0.0642952	24	NO CHANGE	NO CHANGE	DOWN
TC0X00002266.mm.2	Mmgt1; Mir5116	0.000393327	0.00560453	9.39458	9.1829	-0.211687	0.0262235	0.367719	0.292413	-0.075306	0.56065	16.8821	16.6117	-0.270382	0.862937	24	NO CHANGE	NO CHANGE	DOWN
TC1900000709.mm.2	As3mt	0.000393683	0.0187645	10.9608	12.4848	1.52397	9.70409e-19	0.413585	0.253035	-0.16055	0.256481	16.9884	19.4923	2.50389	0.158278	24	NO CHANGE	NO CHANGE	UP
TC0700002693.mm.2	Timm50	0.000394161	0.0536327	8.41208	8.15685	-0.255238	0.0248359	0.383336	0.256848	-0.126488	0.416295	15.4668	17.9831	2.5163	0.212268	24	NO CHANGE	NO CHANGE	DOWN
TC0500000547.mm.2	Stim2	0.000395357	0.182081	7.79708	10.7295	2.93242	7.51567e-25	0.366427	0.220282	-0.146145	0.422509	12.8229	16.149	3.3261	0.21979	24	NO CHANGE	NO CHANGE	UP
TC0900002034.mm.2	A630095E13Rik	0.000400527	0.375238	3.63292	3.73069	0.0977778	0.496433	0.490028	0.147371	-0.342657	0.0929504	3.99026	3.58521	-0.405042	0.919284	24	NO CHANGE	NO CHANGE	NO CHANGE
TC0300001956.mm.2	Ndufc1	0.000400558	0.58082	14.6583	15.0738	0.415476	2.79797e-07	0.329268	0.0305215	-0.298746	0.00353546	20.1257	23.6793	3.55361	0.677593	24	DOWN	NO CHANGE	UP
TC0700002526.mm.2	Vmn1r111	0.000401345	0.707039	3.73	3.80502	0.0750198	0.686755	0.6755	0.0805348	-0.594966	0.0293458	0.00473312	23.3637	-0.641	0.942088	24	DOWN	NO CHANGE	NO CHANGE
TC0300000227.mm.2	Ndufb5	0.000401768	0.351651	11.8737	12.0679	0.194187	0.0202541	0.340903	0.0774738	-0.263429	0.027199	16.5764	10.0712	-6.50526	0.113032	24	DOWN	NO CHANGE	UP
TC1500001192.mm.2	Skp2	0.000402315	0.000745343	5.56042	5.56359	0.00317461	0.9833	0.496313	0.703835	0.207522	0.332374	17.1829	17.6376	0.454766	0.750603	24	NO CHANGE	NO CHANGE	NO CHANGE
TC0500000647.mm.2	Tmem33	0.000402415	0.0182166	13.4671	13.6619	0.194782	0.0243231	0.272528	0.255086	-0.0174423	0.882765	18.3038	18.6458	0.342043	0.842781	24	NO CHANGE	NO CHANGE	UP
TC1300001020.mm.2	Ssbp2	0.000405713	0.0315638	5.39792	5.72276	0.324841	0.0206492	0.52311	0.342054	-0.181056	0.352788	14.6193	11.1538	-3.46547	0.0590304	24	NO CHANGE	NO CHANGE	UP
TC0700000732.mm.2	2610021A01Rik	0.000406073	0.000892235	8.895	8.52863	-0.366369	0.00130872	0.418399	0.429407	0.0110083	0.941224	14.2505	15.9868	1.73622	0.211581	24	NO CHANGE	NO CHANGE	DOWN
TC1200000334.mm.2	Agmo	0.000407935	0.0206816	14.3717	14.4522	0.0805555	0.197793	0.270328	0.142706	-0.127621	0.145658	15.7879	15.4929	-0.294989	0.877818	24	NO CHANGE	NO CHANGE	NO CHANGE
TC1300002126.mm.2	Zcchc6	0.000407988	0.0194044	11.0646	10.621	-0.443552	5.56904e-08	0.343387	0.113135	-0.230251	0.0187927	5.57364	5.9884	0.414756	0.865121	24	DOWN	NO CHANGE	DOWN
TC0500003261.mm.2	Eif2b1	0.000409208	0.000313203	9.36125	9.16175	-0.199504	0.0431442	0.467088	0.315736	-0.151352	0.264052	15.9012	15.5167	-0.384454	0.788418	24	NO CHANGE	NO CHANGE	DOWN
TC0X00001786.mm.2	Eras	0.000411947	0.210359	4.27458	4.33407	0.0594841	0.529859	0.313249	0.146961	-0.166288	0.222636	13.7358	9.68075	-4.05503	0.13572	24	NO CHANGE	NO CHANGE	NO CHANGE
TC1600000234.mm.2	Dgcr6	0.000413285	0.0521477	7.37792	6.95558	-0.422341	0.000521359	0.434239	0.24829	-0.185949	0.246934	17.0048	6.71042	-10.2944	7.22176e-06	24	NO CHANGE	NO CHANGE	DOWN
TC0200003436.mm.2	Scai	0.000414134	0.0217858	5.98542	5.65117	-0.334246	0.00463529	0.446507	0.296581	-0.149926	0.352896	8.67723	10.5879	1.91066	0.269386	24	NO CHANGE	NO CHANGE	DOWN
TC1600000538.mm.2	Lrrc58	0.000414241	0.000463358	12.7383	12.2437	-0.494623	4.57516e-07	0.410962	0.252345	-0.158616	0.179402	18.3965	17.8132	-0.583295	0.697567	24	NO CHANGE	NO CHANGE	DOWN
TC1100000496.mm.2	Ifi47; Olfr56	0.000415446	0.000195515	9.245	9.57909	0.334087	0.0023472	0.443824	0.456876	0.0130522	0.929394	2.68693	0.108668	-2.57826	0.0421193	24	NO CHANGE	ADVANCE	UP
TC1600001177.mm.2	Carhsp1	0.000415465	0.000591663	9.83292	10.0815	0.248552	0.00388478	0.31345	0.350373	0.0369233	0.747232	5.50613	5.29159	-0.214542	0.873279	24	NO CHANGE	NO CHANGE	UP
TC0700002057.mm.2	Ap2a2	0.000415712	0.016302	9.90833	10.1319	0.223571	0.022007	0.337103	0.275921	-0.0611817	0.645222	23.4933	5.81439	6.32105	0.000590769	24	NO CHANGE	DELAY	UP
TC0100001955.mm.2	Arfgef1	0.000416975	0.000128343	12.4187	12.6163	0.19754	0.000178347	0.187951	0.244928	0.0569771	0.409142	11.0852	8.46186	-2.62335	0.0369853	24	NO CHANGE	ADVANCE	UP
TC0200002876.mm.2	Camk1d	0.00041725	1.59374e-05	11.2717	11.0498	-0.221845	0.0949726	0.53039	0.750029	0.219639	0.238257	23.8079	1.03197	1.2241	0.289435	24	NO CHANGE	NO CHANGE	NO CHANGE
TC0600000538.mm.2	Zfp398	0.000418174	0.560279	6.28042	6.26115	-0.0192659	0.843753	0.35097	0.0664837	-0.284486	0.0470644	12.5094	22.0829	9.57354	0.0956754	24	DOWN	NO CHANGE	NO CHANGE
TC0Y00000235.mm.2	Ddx3y	0.000419263	0.00474954	11.3942	11.4359	0.0416865	0.663253	0.398876	0.305476	-0.0934001	0.494749	8.29956	8.60667	0.307103	0.837194	24	NO CHANGE	NO CHANGE	NO CHANGE
TC0100001585.mm.2	Dedd	0.000419532	0.161607	8.53208	8.47653	-0.0555556	0.520353	0.322616	0.139081	-0.183535	0.140837	23.9556	8.60135	8.64575	0.00152864	24	NO CHANGE	NO CHANGE	NO CHANGE
TC0900003234.mm.2	Acaa1b	0.000419755	0.0438176	13.3071	11.5178	-1.78933	6.80565e-11	0.648659	0.529277	-0.119382	0.68116	18.1828	13.8573	-4.32547	0.0301415	24	NO CHANGE	ADVANCE	DOWN
TC0900001042.mm.2	Elovl5	0.000420299	0.00108689	16.8896	17.2773	0.387679	0.00134328	0.506628	0.386033	-0.120595	0.450847	1.65674	1.9541	0.297358	0.834639	24	NO CHANGE	NO CHANGE	UP
TC0800001608.mm.2	Insr	0.00042425	0.0221406	14.4558	13.8691	-0.586706	2.99218e-08	0.351593	0.223018	-0.128575	0.302209	7.89587	9.37924	1.48337	0.395322	24	NO CHANGE	NO CHANGE	DOWN
TC0X00003391.mm.2	Rhox2c	0.000424386	0.0948105	3.49458	3.56006	0.0654762	0.423251	0.288756	0.162699	-0.126057	0.278913	2.4113	0.410243	-2.00106	0.364627	24	NO CHANGE	NO CHANGE	NO CHANGE
TC0700003806.mm.2	Neu3	0.000425151	0.11134	6.20333	5.95188	-0.251448	0.0485962	0.503179	0.211248	-0.291932	0.102486	22.3346	18.849	-3.48565	0.16227	24	NO CHANGE	NO CHANGE	DOWN
TC0800003237.mm.2	Galnt2	0.00042657	0.0151569	8.0575	8.27869	0.22119	0.0198398	0.403537	0.22362	-0.179917	0.16917	19.6643	13.6278	-6.03651	0.00175286	24	NO CHANGE	ADVANCE	UP
TC0500001245.mm.2	Sppl3	0.000427335	0.602955	8.58375	8.50536	-0.0783929	0.341032	0.335833	0.0443797	-0.291454	0.0162519	4.14695	21.1227	-7.02425	0.321471	24	DOWN	NO CHANGE	NO CHANGE
TC1400002341.mm.2	Polr3d	0.000430027	0.385602	4.98625	5.0669	0.0806548	0.534547	0.475493	0.127728	-0.347765	0.0639348	14.174	12.507	-1.66695	0.679443	24	NO CHANGE	NO CHANGE	NO CHANGE
TC0600002422.mm.2	Gadd45a	0.00043076	0.465468	7.2125	8.13022	0.917718	2.97103e-08	0.45746	0.115242	-0.342218	0.0772039	10.7644	2.46694	-8.29746	0.0859518	24	NO CHANGE	NO CHANGE	UP
TC1800000084.mm.2	Mib1	0.000433121	0.00677742	11.5612	11.3868	-0.174425	0.00184706	0.174597	0.187493	0.012896	0.862928	7.40508	7.314	-0.0910878	0.953781	24	NO CHANGE	NO CHANGE	DOWN
TC0300002435.mm.2	Gm10696	0.00043362	0.452049	3.61167	3.74226	0.130595	0.286137	0.424491	0.108217	-0.316274	0.0738915	1.02845	20.7015	-4.32698	0.328104	24	NO CHANGE	NO CHANGE	NO CHANGE
TC1700000594.mm.2	Ndufa7	0.00043371	0.302367	6.39292	6.18806	-0.204861	0.0494954	0.377084	0.115591	-0.261493	0.0717426	17.9927	16.1745	-1.81822	0.616616	24	NO CHANGE	NO CHANGE	DOWN
TC0200000587.mm.2	St6galnac6; St6galnac4	0.000434217	0.0193501	8.33125	7.84917	-0.482083	0.000972365	0.537502	0.366095	-0.171407	0.379223	20.4332	19.8739	-0.559332	0.744931	24	NO CHANGE	NO CHANGE	DOWN
TC1400002336.mm.2	Slc39a14	0.000435152	0.0382854	13.3492	12.6923	-0.656885	0.000381571	0.637094	0.416857	-0.220236	0.366292	8.56918	12.2348	3.66563	0.0549133	24	NO CHANGE	NO CHANGE	DOWN
TC0100000655.mm.2	Stk16	0.000435465	0.00651874	9.75042	9.7201	-0.0303175	0.734891	0.359966	0.271965	-0.0880015	0.483236	17.8238	15.3263	-2.49747	0.124345	24	NO CHANGE	NO CHANGE	NO CHANGE
TC1300000958.mm.2	Arrdc3	0.00043636	0.00471712	12.0658	11.0738	-0.992044	0.00178693	1.5166	0.643278	-0.873327	0.046167	9.11229	9.85856	0.746264	0.69542	24	DOWN	NO CHANGE	DOWN
TC1700001178.mm.2	Crim1	0.000437233	0.000428622	9.29458	9.30571	0.011131	0.90588	0.34669	0.444189	0.0974996	0.469348	9.06024	11.3036	2.24336	0.0907203	24	NO CHANGE	NO CHANGE	NO CHANGE
TC1100004212.mm.2	Fam195b	0.000439593	0.0260886	5.52167	5.36177	-0.159901	0.103722	0.351571	0.252044	-0.0995267	0.46289	8.09501	4.14226	-3.95275	0.0362469	24	NO CHANGE	ADVANCE	NO CHANGE
TC0200002587.mm.2	Slc9a8	0.000443141	0.000927015	9.18083	9.59683	0.415992	2.68481e-06	0.37746	0.224524	-0.152936	0.169381	7.96205	9.55701	1.59496	0.292682	24	NO CHANGE	NO CHANGE	UP
TC1300002535.mm.2	Gtf2h2	0.000444337	0.030757	8.24208	8.153	-0.0890873	0.456889	0.493944	0.280178	-0.213766	0.214052	21.4455	20.9129	-0.532602	0.773993	24	NO CHANGE	NO CHANGE	NO CHANGE
TC0300002277.mm.2	Cd1d1	0.000445863	0.341708	13.2712	11.5687	-1.7026	4.9366e-20	0.272595	0.124726	-0.147869	0.304732	18.5275	1.76199	7.23449	0.042457	24	NO CHANGE	NO CHANGE	DOWN
TC0600000676.mm.2	Avl9	0.000447373	0.0259139	9.37708	8.90728	-0.469802	0.000185916	0.483356	0.265264	-0.218092	0.181369	3.72317	5.51572	1.79255	0.354314	24	NO CHANGE	NO CHANGE	DOWN
TC0300002714.mm.2	Strip1	0.000451576	0.0766485	7.605	7.61165	0.00664682	0.940432	0.373254	0.158161	-0.215093	0.0893655	20.7597	4.53605	7.77632	0.00220501	24	NO CHANGE	NO CHANGE	NO CHANGE
TC1900000983.mm.2	Scyl1	0.000452326	0.00278703	8.39458	8.86069	0.466111	8.22219e-05	0.52244	0.273798	-0.248642	0.107193	8.192	7.21162	-0.980386	0.564296	24	NO CHANGE	NO CHANGE	UP
TC1200000600.mm.2	Actr10	0.0004543	0.553873	9.69792	9.72492	0.027004	0.625662	0.231386	0.0327366	-0.198649	0.0147246	10.1311	12.3315	2.20041	0.736523	24	DOWN	NO CHANGE	NO CHANGE
TC1500000281.mm.2	4930447A16Rik	0.000455671	0.222617	3.34167	3.30853	-0.0331348	0.779783	0.46369	0.152936	-0.310754	0.066609	1.7263	2.82701	1.10071	0.730782	24	NO CHANGE	NO CHANGE	NO CHANGE
TC1000001183.mm.2	Btg1	0.000456002	0.26481	8.44417	8.36623	-0.0779365	0.621387	0.655528	0.174334	-0.481194	0.033998	23.0607	2.81332	3.75265	0.309633	24	DOWN	NO CHANGE	NO CHANGE
TC1200001990.mm.2	Actn1	0.000456859	9.49154e-05	7.40083	7.44942	0.0485913	0.655695	0.503904	0.447065	-0.0568396	0.713427	9.1281	12.2266	3.09852	0.0158432	24	NO CHANGE	DELAY	NO CHANGE
TC0400001312.mm.2	Ebna1bp2; D4Ertd617e	0.0004581	0.00669697	9.47875	9.76994	0.29119	0.00441121	0.385454	0.296617	-0.0888375	0.514323	15.9257	15.9824	0.0566973	0.971858	24	NO CHANGE	NO CHANGE	UP
TC0900002018.mm.2	Hyls1	0.000458315	0.144764	8.40625	8.76155	0.355298	0.00114837	0.358024	0.172344	-0.18568	0.198812	3.74643	4.76768	1.02125	0.692071	24	NO CHANGE	NO CHANGE	UP
TC1400001783.mm.2	Tspan14	0.000460241	2.55278e-05	9.13208	8.8499	-0.282183	0.000730384	0.350833	0.378468	0.027635	0.803814	22.3225	22.2405	-0.0820168	0.942685	24	NO CHANGE	NO CHANGE	DOWN
TC1500001127.mm.2	Hnrnpa1; Gm10052	0.000462068	0.00641527	9.865	10.183	0.318016	0.000837617	0.378297	0.262927	-0.11537	0.365749	8.25682	9.49528	1.23846	0.426888	24	NO CHANGE	NO CHANGE	UP
TC0700002529.mm.2	Vmn1r115	0.000462124	0.208124	3.785	3.62208	-0.162917	0.408424	0.540883	0.314034	-0.226849	0.410178	3.02124	3.9037	0.882455	0.754758	24	NO CHANGE	NO CHANGE	NO CHANGE
TC0500001308.mm.2	2410131K14Rik	0.00046274	0.00073333	5.07	4.98724	-0.0827579	0.494142	0.417974	0.539776	0.121802	0.473196	18.8039	17.5	-1.30392	0.354036	24	NO CHANGE	NO CHANGE	NO CHANGE
TC1800000816.mm.2	Smad2	0.000463012	0.000526437	7.30292	7.33542	0.0325	0.732873	0.438891	0.331588	-0.107303	0.428017	9.46437	12.6414	3.17701	0.0250557	24	NO CHANGE	DELAY	NO CHANGE
TC1100003787.mm.2	Stat5b	0.000463323	0.00520069	7.43042	8.04575	0.615337	2.86858e-06	0.435189	0.375076	-0.0601127	0.707202	1.68927	2.94439	1.25511	0.421522	24	NO CHANGE	NO CHANGE	UP
TC0100000171.mm.2	Lmbrd1	0.000464871	0.037338	12.2254	12.201	-0.0244048	0.725079	0.19018	0.19916	0.00897968	0.927836	8.52888	10.5976	2.06873	0.280763	24	NO CHANGE	NO CHANGE	NO CHANGE
TC1700002775.mm.2	Zfp414	0.000467656	0.0523043	6.44333	6.48429	0.0409524	0.771023	0.538792	0.311229	-0.227562	0.258573	5.45583	7.80925	2.35342	0.241093	24	NO CHANGE	NO CHANGE	NO CHANGE
TC1300002062.mm.2	Dok3	0.000468282	0.0909449	6.26792	6.62704	0.359127	0.0176978	0.502662	0.295592	-0.20707	0.317992	2.45074	6.46835	4.01761	0.0752153	24	NO CHANGE	NO CHANGE	UP
TC1000000122.mm.2	Cited2	0.000468438	0.00348018	12.6296	12.9712	0.341647	0.0704141	0.688059	0.679054	-0.00900498	0.972808	23.5572	23.1541	-0.403054	0.7809	24	NO CHANGE	NO CHANGE	NO CHANGE
TC1100003588.mm.2	Kat7	0.000470345	0.219316	7.52333	7.73968	0.216349	0.0486315	0.46431	0.128895	-0.335415	0.0332168	10.7832	9.39869	-1.38454	0.6713	24	DOWN	NO CHANGE	UP
TC0100003186.mm.2	Cfhr1	0.000470468	0.534477	14.6162	13.4086	-1.20766	2.06841e-14	0.385122	0.0721821	-0.31294	0.0392712	16.7993	16.9408	0.141504	0.980733	24	DOWN	NO CHANGE	DOWN
TC0400001694.mm.2	4930549C01Rik	0.000471583	0.475923	4.33458	4.18796	-0.146627	0.244997	0.421429	0.104283	-0.317146	0.0772411	0.545679	13.7909	-10.7547	0.029866	24	NO CHANGE	NO CHANGE	NO CHANGE
TC1200002120.mm.2	Vipas39	0.000473986	0.0807035	6.76	6.90272	0.142718	0.185791	0.362537	0.221888	-0.140649	0.349148	12.3693	17.091	4.72169	0.0363379	24	NO CHANGE	NO CHANGE	NO CHANGE
TC0X00002783.mm.2	Slc16a2	0.000476019	0.00612669	10.9646	11.0765	0.111925	0.419008	0.564833	0.424887	-0.139946	0.476749	6.18553	7.86655	1.68102	0.280545	24	NO CHANGE	NO CHANGE	NO CHANGE
TC0200005491.mm.2	Gm14419	0.000476867	0.000311316	11.0554	11.2732	0.217798	0.0381717	0.491639	0.332635	-0.159004	0.270406	16.1004	16.9743	0.873936	0.545918	24	NO CHANGE	NO CHANGE	UP
TC0200005346.mm.2	Gm2004	0.000476869	0.000311308	11.0554	11.2732	0.217798	0.0381717	0.491639	0.332635	-0.159004	0.270406	16.1004	16.9743	0.873934	0.545919	24	NO CHANGE	NO CHANGE	UP
TC0600001672.mm.2	Slco1b2	0.000484411	0.0184141	16.0208	14.3293	-1.69151	3.29641e-18	0.260314	0.380673	0.120359	0.453696	10.2862	13.8217	3.53547	0.0856644	24	NO CHANGE	NO CHANGE	DOWN
TC0X00001964.mm.2	Gm5934	0.000485247	0.238449	4.11167	4.06954	-0.042123	0.799192	0.623309	0.217831	-0.405478	0.0901398	23.6471	0.300642	0.65351	0.831995	24	NO CHANGE	NO CHANGE	NO CHANGE
TC1700002216.mm.2	Foxp4	0.000488557	0.644537	5.68208	5.90897	0.226885	0.0164025	0.284935	0.0503335	-0.234602	0.0719776	7.75406	17.2573	9.50321	0.193239	24	NO CHANGE	NO CHANGE	UP
TC0900001067.mm.2	Senp6	0.00049417	0.0756412	10.7467	10.4775	-0.269187	3.17477e-05	0.228383	0.10996	-0.118423	0.149956	7.06382	14.6538	7.58999	0.00175825	24	NO CHANGE	NO CHANGE	DOWN
TC0300000416.mm.2	Spg20	0.000494628	0.111558	9.12125	8.79452	-0.326726	0.000492578	0.370845	0.137328	-0.233517	0.0638547	1.45552	0.256808	-1.19871	0.642452	24	NO CHANGE	NO CHANGE	DOWN
TC0800002683.mm.2	Rpgrip1l	0.000497545	0.447859	6.3175	6.38254	0.0650397	0.560836	0.393198	0.0992664	-0.293932	0.071069	17.7123	21.4987	3.78643	0.389539	24	NO CHANGE	NO CHANGE	NO CHANGE
TC1600001312.mm.2	Tango2	0.000499073	0.102838	8.85667	8.50649	-0.350179	0.000373909	0.383257	0.145061	-0.238196	0.066233	16.241	15.9796	-0.261414	0.920869	24	NO CHANGE	NO CHANGE	DOWN
TC1100003593.mm.2	Ngfr	0.000499623	0.00476512	5.38208	5.16179	-0.220298	0.0107325	0.347102	0.252301	-0.0948009	0.419129	2.03971	1.54786	-0.491853	0.753296	24	NO CHANGE	NO CHANGE	DOWN
TC0200000354.mm.2	Pdss1	0.000501209	0.197851	6.30792	6.62345	0.315536	0.0133582	0.508171	0.162339	-0.345833	0.0534911	13.0238	20.4647	7.44088	0.0172625	24	NO CHANGE	NO CHANGE	UP
TC1100002579.mm.2	Ublcp1	0.000502413	0.07755	10.4825	10.8089	0.326409	0.000756084	0.308951	0.190762	-0.118189	0.355261	14.3126	18.469	4.15638	0.0579599	24	NO CHANGE	NO CHANGE	UP
TC0500001842.mm.2	Uspl1	0.000504331	2.2606e-06	9.47333	9.78437	0.311032	0.0105036	0.600667	0.438325	-0.162342	0.323316	16.7575	17.0628	0.305383	0.811397	24	NO CHANGE	NO CHANGE	UP
TC0200002990.mm.2	Hacd1	0.000504479	6.13804e-06	12.6133	12.5969	-0.0164087	0.802103	0.279654	0.36461	0.0849566	0.355548	17.5256	15.8875	-1.6381	0.153321	24	NO CHANGE	NO CHANGE	NO CHANGE
TC0200002748.mm.2	Gm14420	0.000505708	0.000182939	13.7763	13.1873	-0.588968	2.62776e-05	0.596723	0.429733	-0.16699	0.342688	15.183	15.532	0.349025	0.802688	24	NO CHANGE	NO CHANGE	DOWN
TC1500001932.mm.2	Phf5a	0.000507495	0.0193086	10.5512	10.5335	-0.0177778	0.852878	0.312631	0.285444	-0.0271874	0.840859	14.3001	13.2154	-1.08468	0.534253	24	NO CHANGE	NO CHANGE	NO CHANGE
TC0500001717.mm.2	Wipi2	0.000507624	0.0696647	10.4096	10.1679	-0.241706	0.00222265	0.254952	0.16417	-0.0907821	0.392385	5.79448	7.4464	1.65192	0.425353	24	NO CHANGE	NO CHANGE	DOWN
TC0600002543.mm.2	Mrpl19	0.000511675	0.0265995	8.92292	9.18331	0.260397	0.0224988	0.358937	0.310605	-0.0483317	0.757113	17.0692	18.941	1.87175	0.301696	24	NO CHANGE	NO CHANGE	UP
TC1000000536.mm.2	Gm10322	0.000512545	0.0729384	6.08958	6.13643	0.0468452	0.706016	0.537898	0.215856	-0.322042	0.0722708	0.412077	0.866927	0.454851	0.84862	24	NO CHANGE	NO CHANGE	NO CHANGE
TC1200001908.mm.2	Dhrs7	0.000513686	0.516577	9.19333	10.2565	1.06313	2.69874e-11	0.451754	0.0818658	-0.369888	0.0310036	14.9621	13.9839	-0.978154	0.864716	24	DOWN	NO CHANGE	UP
TC0700004095.mm.2	Sbf2	0.000514651	0.00736518	9.43042	9.60442	0.174008	0.0326764	0.353672	0.210979	-0.142694	0.211911	7.93698	9.38322	1.44624	0.383359	24	NO CHANGE	NO CHANGE	UP
TC1800000708.mm.2	Psmg2	0.000518817	0.137396	9.50792	9.59714	0.0892262	0.315269	0.335038	0.145203	-0.189836	0.133955	8.12353	0.939559	-7.18397	0.0070944	24	NO CHANGE	NO CHANGE	NO CHANGE
TC0200002872.mm.2	Optn	0.000519734	0.086491	8.83667	8.14093	-0.695734	7.82068e-08	0.405592	0.209021	-0.196571	0.203021	11.0038	11.7046	0.700745	0.749775	24	NO CHANGE	NO CHANGE	DOWN
TC1700001458.mm.2	Acat3	0.000521801	0.0719633	12.6096	12.6248	0.0152381	0.883036	0.328313	0.235458	-0.0928547	0.528594	22.2689	0.388853	2.11995	0.307741	24	NO CHANGE	NO CHANGE	NO CHANGE
TC1200002011.mm.2	Slc10a1	0.000521831	0.335201	17.5837	17.6633	0.079504	0.212944	0.250459	0.0643783	-0.186081	0.0435674	10.3196	7.93054	-2.38902	0.538293	24	DOWN	NO CHANGE	NO CHANGE
TC0600002641.mm.2	Mxd1	0.000521962	0.0163727	6.66292	6.61573	-0.0471825	0.705496	0.494369	0.339911	-0.154458	0.388175	4.58499	8.99078	4.40579	0.0119462	24	NO CHANGE	DELAY	NO CHANGE
TC1200002434.mm.2	Akt1	0.000522143	0.0831132	9.72958	11.2744	1.54478	6.87767e-18	0.402059	0.210204	-0.191856	0.210599	11.2712	9.71121	-1.55997	0.46969	24	NO CHANGE	NO CHANGE	UP
TC0100002764.mm.2	Ngef	0.000522648	0.00191016	8.41417	7.74032	-0.673849	4.81734e-09	0.370575	0.335694	-0.0348807	0.790697	11.3047	10.5107	-0.794051	0.569864	24	NO CHANGE	NO CHANGE	DOWN
TC1000001640.mm.2	Olfr784	0.000524335	0.302566	4.26375	4.23575	-0.027996	0.805237	0.359062	0.14497	-0.214092	0.190315	1.04578	23.6062	-1.4396	0.654106	24	NO CHANGE	NO CHANGE	NO CHANGE
TC0X00002825.mm.2	Magt1	0.000525445	1.65537e-06	13.4808	13.5531	0.0723016	0.443304	0.439396	0.500052	0.0606557	0.648475	18.2071	18.984	0.77684	0.475763	24	NO CHANGE	NO CHANGE	NO CHANGE
TC1000000484.mm.2	Asf1a	0.000526625	0.0567639	7.38042	7.5246	0.144187	0.169398	0.359954	0.241848	-0.118106	0.427138	12.5815	10.9678	-1.6137	0.410919	24	NO CHANGE	NO CHANGE	NO CHANGE
TC0300003194.mm.2	Cth	0.000528341	0.00283673	14.9825	14.4551	-0.52744	1.56642e-05	0.410899	0.388209	-0.0226906	0.881898	23.2357	1.62202	2.38628	0.110985	24	NO CHANGE	NO CHANGE	DOWN
TC0200003155.mm.2	Lcn12	0.000528812	0.0226966	4.31625	4.39417	0.0779167	0.603464	0.670566	0.31668	-0.353886	0.0983598	18.2468	17.9652	-0.281648	0.889757	24	NO CHANGE	NO CHANGE	NO CHANGE
TC1200000576.mm.2	Atp5s	0.000529266	0.122849	5.85792	5.88659	0.0286706	0.837426	0.544029	0.228451	-0.315577	0.112112	8.33099	4.989	-3.34199	0.202588	24	NO CHANGE	NO CHANGE	NO CHANGE
TC1100001196.mm.2	Adap2	0.000532963	0.00283839	11.6767	11.6106	-0.0660516	0.384111	0.301801	0.254628	-0.0471733	0.656236	15.1978	17.2865	2.08867	0.169055	24	NO CHANGE	NO CHANGE	NO CHANGE
TC0600000850.mm.2	Ggcx	0.000533087	0.0826162	13.9025	13.8668	-0.0356746	0.656118	0.277208	0.168993	-0.108215	0.346866	20.7864	21.4104	0.624058	0.765941	24	NO CHANGE	NO CHANGE	NO CHANGE
TC1500000398.mm.2	Mtbp	0.000533396	0.00778825	5.64208	6.18849	0.546409	6.87759e-05	0.556827	0.310672	-0.246155	0.16187	10.4765	14.8171	4.34056	0.018676	24	NO CHANGE	DELAY	UP
TC1500001658.mm.2	St3gal1	0.00053758	4.39168e-06	10.945	11.3374	0.392401	0.00106134	0.505643	0.599957	0.0943133	0.554354	22.4261	0.234222	1.8081	0.105977	24	NO CHANGE	NO CHANGE	UP
TC0X00001056.mm.2	Magee1	0.000537705	0.142085	3.14792	2.78831	-0.359603	0.000810336	0.372595	0.167499	-0.205096	0.156268	16.3593	20.95	4.59065	0.0696476	24	NO CHANGE	NO CHANGE	DOWN
TC1400001216.mm.2	Gm4663	0.000538588	0.367058	2.83	2.63806	-0.191944	0.00247757	0.257772	0.0514991	-0.206273	0.0193318	1.29015	23.897	-1.39314	0.758214	24	DOWN	NO CHANGE	DOWN
TC0400001123.mm.2	Tmem59	0.000539268	0.119777	13.7571	13.5289	-0.228135	0.026872	0.38969	0.164171	-0.225519	0.11227	17.0421	15.4352	-1.60688	0.536171	24	NO CHANGE	NO CHANGE	DOWN
TC0100001178.mm.2	Nucks1	0.000539813	0.00106377	11.0367	10.6701	-0.366587	0.000219706	0.314644	0.385505	0.0708613	0.578525	17.161	16.817	-0.343985	0.810561	24	NO CHANGE	NO CHANGE	DOWN
TC0600001352.mm.2	Cecr2	0.000539905	0.0036197	5.63833	5.70893	0.0705952	0.535385	0.437898	0.382348	-0.05555	0.726888	6.23307	3.34385	-2.88922	0.0641472	24	NO CHANGE	NO CHANGE	NO CHANGE
TC0400000395.mm.2	Ccl19	0.000540301	0.176666	5.40458	6.34425	0.939663	1.49665e-10	0.340809	0.192688	-0.148121	0.355893	3.2432	10.229	6.98584	0.00778493	24	NO CHANGE	NO CHANGE	UP
TC1300001557.mm.2	Hist1h4k	0.000540324	0.00883766	9.81667	10.199	0.382381	0.000210803	0.357807	0.286701	-0.0711054	0.592849	21.5986	17.6216	-3.977	0.0187005	24	NO CHANGE	ADVANCE	UP
TC0300000323.mm.2	D3Ertd751e	0.00054153	0.0403622	8.825	8.97058	0.145575	0.0519679	0.289904	0.164208	-0.125696	0.230325	19.1587	0.384648	5.2259	0.0103733	24	NO CHANGE	DELAY	NO CHANGE
TC0800001493.mm.2	Cdt1	0.000545489	0.0525309	6.20125	6.12	-0.08125	0.57306	0.495535	0.333629	-0.161906	0.426161	5.91655	13.6857	7.76912	0.000352751	24	NO CHANGE	NO CHANGE	NO CHANGE
TC0200004481.mm.2	Zscan29	0.000546271	0.415978	7.45042	7.69323	0.242817	0.0202572	0.409095	0.0852721	-0.323822	0.0296861	14.3374	22.5515	8.21412	0.078392	24	DOWN	NO CHANGE	UP
TC1600000726.mm.2	Cblb	0.000548006	0.000157141	8.70208	8.60194	-0.100139	0.41701	0.496543	0.574216	0.0776733	0.657332	5.53809	8.10903	2.57095	0.0433577	24	NO CHANGE	DELAY	NO CHANGE
TC0200004269.mm.2	Elp4	0.000549147	0.259475	9.55292	9.01409	-0.538829	2.2418e-06	0.30188	0.138924	-0.162955	0.248452	21.7533	0.323344	2.57007	0.391822	24	NO CHANGE	NO CHANGE	DOWN
TC1400000165.mm.2	Fam149b	0.000550182	0.223673	6.24833	5.98038	-0.267956	0.0237797	0.401491	0.159155	-0.242336	0.137591	16.5289	17.4421	0.913173	0.763406	24	NO CHANGE	NO CHANGE	DOWN
TC0800003096.mm.2	Vps9d1	0.00055034	0.177098	4.65375	4.53579	-0.117956	0.294376	0.447459	0.159331	-0.288128	0.0760773	5.06664	11.5284	6.46173	0.0266832	24	NO CHANGE	NO CHANGE	NO CHANGE
TC0100002025.mm.2	Gm2710; Gm10075	0.000551254	7.17092e-05	13.3763	13.1133	-0.262937	4.64154e-05	0.257298	0.258911	0.00161302	0.984499	11.6469	10.761	-0.885949	0.46279	24	NO CHANGE	NO CHANGE	DOWN
TSUnmapped00000042.mm.2	E2f3	0.000552031	0.0753083	7.2725	7.12429	-0.148214	0.228404	0.373219	0.281665	-0.0915536	0.600345	9.43661	10.1566	0.720022	0.725339	24	NO CHANGE	NO CHANGE	NO CHANGE
TC1900001588.mm.2	Mgea5	0.000553495	0.0205921	10.2188	10.0057	-0.213036	0.0883294	0.44991	0.329512	-0.120398	0.485553	4.50378	5.40602	0.902246	0.614746	24	NO CHANGE	NO CHANGE	NO CHANGE
TC0700004525.mm.2	Hras	0.000553692	0.00693981	9.12458	9.05552	-0.0690675	0.274854	0.273908	0.168155	-0.105753	0.235615	16.2035	13.7578	-2.44563	0.153771	24	NO CHANGE	NO CHANGE	NO CHANGE
TC0700002259.mm.2	Vmn2r44	0.000556228	0.488029	3.47292	3.51958	0.0466667	0.754797	0.511139	0.120894	-0.390245	0.071305	0.227437	7.69678	7.46934	0.129763	24	NO CHANGE	NO CHANGE	NO CHANGE
TC1100003111.mm.2	Inca1	0.000556706	0.00921922	8.79625	9.35687	0.560615	0.00029773	0.636457	0.347527	-0.28893	0.152665	3.48834	4.4639	0.975562	0.594317	24	NO CHANGE	NO CHANGE	UP
TC1000002420.mm.2	Adarb1	0.000557023	0.000168079	8.52833	9.38304	0.854702	9.60317e-10	0.455133	0.484074	0.0289406	0.851725	11.2647	12.4193	1.15467	0.35871	24	NO CHANGE	NO CHANGE	UP
TC1400002132.mm.2	Zmym5	0.000558194	0.00855875	10.6438	10.5201	-0.123651	0.185283	0.32055	0.309912	-0.0106381	0.935795	5.77628	10.4547	4.67844	0.00448401	24	NO CHANGE	DELAY	NO CHANGE
TC0700000451.mm.2	BC024978	0.00055823	0.00024178	6.06958	6.09308	0.0234921	0.752377	0.30007	0.33287	0.0327996	0.75654	11.4196	12.1979	0.778301	0.540385	24	NO CHANGE	NO CHANGE	NO CHANGE
TC1400002343.mm.2	Bmp1	0.000561029	0.00561091	9.80917	9.76153	-0.0476389	0.619374	0.369093	0.301968	-0.0671247	0.616595	18.6757	15.6852	-2.99053	0.0655089	24	NO CHANGE	NO CHANGE	NO CHANGE
TC0X00002339.mm.2	4930447F04Rik	0.000562519	0.181136	3.6625	3.6698	0.00730159	0.954483	0.476745	0.185844	-0.290901	0.109755	23.3831	15.0751	-8.308	0.00618377	24	NO CHANGE	NO CHANGE	NO CHANGE
TC1300000674.mm.2	Txndc15	0.000563303	0.0187379	11.9612	11.1525	-0.80877	3.48275e-12	0.290238	0.236347	-0.0538905	0.645986	20.5503	15.7905	-4.75976	0.0100923	24	NO CHANGE	ADVANCE	DOWN
TC0400004221.mm.2	AU022252	0.000563676	0.000227649	8.675	9.43353	0.758532	6.05649e-12	0.319558	0.367214	0.0476563	0.677052	23.5708	23.4456	-0.125218	0.920757	24	NO CHANGE	NO CHANGE	UP
TC0400002481.mm.2	Ccl19	0.000563897	0.0149549	6.285	4.01405	-2.27095	6.38907e-22	0.435051	0.347223	-0.0878277	0.604454	3.34563	13.958	10.6124	1.94547e-07	24	NO CHANGE	DELAY	DOWN
TC0600001259.mm.2	Tatdn2	0.000568411	0.00709348	6.63167	6.81069	0.179028	0.102444	0.470882	0.288687	-0.182195	0.236218	13.8302	13.002	-0.828207	0.623024	24	NO CHANGE	NO CHANGE	NO CHANGE
TC0200005186.mm.2	B4galt5	0.0005688	0.00762542	8.83792	9.38611	0.548194	0.0115926	0.884187	0.575816	-0.308371	0.298345	10.6106	13.3392	2.72869	0.106738	24	NO CHANGE	NO CHANGE	UP
TC1400000469.mm.2	Gm8247	0.000568929	0.302624	3.86625	3.89964	0.033393	0.831326	0.581431	0.176617	-0.404814	0.0723053	2.63828	1.65392	-0.984354	0.784712	24	NO CHANGE	NO CHANGE	NO CHANGE
TC0500003198.mm.2	Sh2b3	0.000569238	0.109457	6.35875	6.32147	-0.0372817	0.693697	0.367515	0.159599	-0.207916	0.121284	12.9674	15.6109	2.64353	0.299971	24	NO CHANGE	NO CHANGE	NO CHANGE
TC0100001245.mm.2	Arl8a	0.000569653	0.0022632	9.065	9.27141	0.206409	0.0760783	0.446579	0.417779	-0.0287992	0.859988	5.67862	10.1122	4.43357	0.00296932	24	NO CHANGE	DELAY	NO CHANGE
TC0500000069.mm.2	Gm8879	0.000569733	0.185573	3.94625	3.83308	-0.113175	0.389662	0.469091	0.199182	-0.26991	0.151612	0.599599	19.5867	-5.01289	0.0723371	24	NO CHANGE	NO CHANGE	NO CHANGE
TC1100002725.mm.2	Hspa4	0.000570275	0.224411	14.2504	14.1638	-0.0866667	0.241001	0.218948	0.109039	-0.109909	0.286693	16.6501	15.8686	-0.781472	0.790528	24	NO CHANGE	NO CHANGE	NO CHANGE
TC1500001919.mm.2	Slc25a17	0.000573539	0.0487912	12.9117	12.3391	-0.57256	6.92584e-08	0.356959	0.18391	-0.173049	0.171841	17.8455	20.476	2.63046	0.201624	24	NO CHANGE	NO CHANGE	DOWN
TC0100003531.mm.2	Pcp4l1	0.000573669	0.412006	6.12667	5.49014	-0.636528	4.91956e-07	0.496132	0.0737933	-0.422338	0.00847828	19.1625	21.5131	2.3506	0.672852	24	DOWN	NO CHANGE	DOWN
TC0200004140.mm.2	Cry2	0.000575118	4.9247e-10	10.2192	9.8923	-0.326865	0.0115327	0.612491	0.904865	0.292373	0.0981865	12.6871	15.6319	2.94476	0.00300302	24	NO CHANGE	DELAY	DOWN
TC1400001306.mm.2	Rap2a	0.000576189	0.00836309	8.44833	7.09343	-1.3549	1.67256e-12	0.569376	0.374765	-0.194611	0.312794	13.6898	15.1673	1.47752	0.387732	24	NO CHANGE	NO CHANGE	DOWN
TC1800001478.mm.2	Lman1	0.000577732	0.281008	14.8575	14.919	0.0614683	0.419753	0.29475	0.0857277	-0.209023	0.0556918	14.3747	18.1777	3.80299	0.292269	24	NO CHANGE	NO CHANGE	NO CHANGE
TC1300002525.mm.2	Cartpt	0.000578904	0.0121386	5.23667	5.22988	-0.00678571	0.940171	0.346061	0.254779	-0.0912824	0.471992	2.85141	3.13411	0.282707	0.868824	24	NO CHANGE	NO CHANGE	NO CHANGE
TC0600000848.mm.2	0610030E20Rik	0.000581564	0.167588	7.2225	7.20127	-0.0212302	0.854177	0.494497	0.151142	-0.343355	0.040234	0.591349	18.7349	-5.8564	0.0635704	24	DOWN	NO CHANGE	NO CHANGE
TC0900001692.mm.2	Aasdhppt	0.000583033	0.0747947	10.4238	10.0303	-0.393452	1.41063e-05	0.310336	0.158592	-0.151744	0.189869	23.9692	20.5206	-3.44866	0.115636	24	NO CHANGE	NO CHANGE	DOWN
TC0100001786.mm.2	Bpnt1	0.000583409	0.336536	7.81833	7.80058	-0.0177579	0.86387	0.352208	0.118205	-0.234003	0.119019	19.3507	20.8883	1.53758	0.660885	24	NO CHANGE	NO CHANGE	NO CHANGE
TC0400001523.mm.2	Bsdc1	0.000585818	0.116356	10.4758	10.4712	-0.00458333	0.965382	0.37056	0.192403	-0.178157	0.23584	4.37426	6.60427	2.23001	0.35272	24	NO CHANGE	NO CHANGE	NO CHANGE
TC1700000349.mm.2	Rps2; Snora64	0.000586709	0.0079041	17.2458	17.1999	-0.0458929	0.354121	0.158473	0.168762	0.0102892	0.881997	17.4941	18.112	0.617939	0.705834	24	NO CHANGE	NO CHANGE	NO CHANGE
TC0600003119.mm.2	Tpi1	0.000587638	0.00432055	13.4625	13.9478	0.485258	0.000353701	0.535802	0.37735	-0.158453	0.37852	19.1707	21.1679	1.99724	0.197959	24	NO CHANGE	NO CHANGE	UP
TC0100002214.mm.2	Rev1	0.000587876	0.0156466	6.72792	6.8201	0.0921825	0.394667	0.383113	0.321597	-0.0615164	0.690138	10.1223	10.5939	0.471555	0.77561	24	NO CHANGE	NO CHANGE	NO CHANGE
TC0300000829.mm.2	Sprr2i	0.000588778	0.0565605	4.26458	4.10179	-0.162798	0.162723	0.372796	0.268466	-0.104331	0.519789	2.34802	5.59586	3.24783	0.118311	24	NO CHANGE	NO CHANGE	NO CHANGE
TC1000000661.mm.2	Ank3	0.000593187	0.169842	7.04583	6.49782	-0.548016	0.00754782	0.877783	0.238759	-0.639024	0.0259844	9.26692	12.4796	3.2127	0.328141	24	DOWN	NO CHANGE	DOWN
TC1500000726.mm.2	L3mbtl2	0.000593217	0.116706	6.39875	5.91192	-0.486825	6.24255e-05	0.452846	0.176976	-0.27587	0.0846162	14.6731	9.54723	-5.12586	0.046858	24	NO CHANGE	NO CHANGE	DOWN
TC1400000588.mm.2	Vmn2r89	0.000593664	0.251027	3.97208	3.95978	-0.0123016	0.937777	0.52189	0.219441	-0.302449	0.184061	22.2431	21.2285	-1.01466	0.730672	24	NO CHANGE	NO CHANGE	NO CHANGE
TC1600001064.mm.2	Dyrk1a	0.000594172	0.0382305	8.62625	8.77018	0.143929	0.101539	0.33505	0.197763	-0.137287	0.265623	6.06582	7.16915	1.10332	0.571665	24	NO CHANGE	NO CHANGE	NO CHANGE
TC1700002324.mm.2	Ptprs	0.00059658	0.0238183	6.70167	6.68119	-0.0204762	0.858615	0.459356	0.286139	-0.173217	0.295065	4.81696	10.5998	5.7828	0.00228043	24	NO CHANGE	DELAY	NO CHANGE
TC0800003071.mm.2	Snai3	0.000597296	0.694936	4.85125	5.23599	0.384742	0.000908434	0.347003	0.0513672	-0.295636	0.0608882	2.67075	23.4283	-3.24241	0.688826	24	NO CHANGE	NO CHANGE	UP
TC0400001143.mm.2	Coa7	0.000597474	0.13507	5.2225	4.79008	-0.432421	0.00125552	0.450028	0.218501	-0.231527	0.200971	9.59496	8.82074	-0.774223	0.749162	24	NO CHANGE	NO CHANGE	DOWN
TC0100003725.mm.2	Mia3	0.000599299	3.81705e-05	13.4663	12.4931	-0.973175	4.6854e-16	0.291893	0.415165	0.123272	0.255723	10.4354	12.1817	1.74634	0.151626	24	NO CHANGE	NO CHANGE	DOWN
TC1300000050.mm.2	Larp4b	0.000599326	0.00022959	10.6113	10.4997	-0.111587	0.123499	0.308573	0.293636	-0.0149374	0.883628	9.35371	10.7655	1.41183	0.269213	24	NO CHANGE	NO CHANGE	NO CHANGE
TC1100000428.mm.2	Ccnjl	0.000599898	0.00144487	3.22917	3.23972	0.0105556	0.916516	0.41119	0.368162	-0.0430283	0.764881	0.197488	23.0775	-1.12002	0.421781	24	NO CHANGE	NO CHANGE	NO CHANGE
TC1100000967.mm.2	Rabep1	0.000601079	0.295209	11.4875	10.9198	-0.567738	5.1252e-06	0.314717	0.140718	-0.173999	0.257327	22.8658	16.6691	-6.19668	0.067747	24	NO CHANGE	NO CHANGE	DOWN
TC0300000949.mm.2	Txnip	0.00060264	0.0980176	12.2554	12.4863	0.230833	0.159211	0.590877	0.310748	-0.280129	0.230525	11.6872	9.34928	-2.33792	0.296761	24	NO CHANGE	NO CHANGE	NO CHANGE
TC0700001816.mm.2	Ypel3	0.000602912	0.00455542	11.5392	10.7004	-0.83877	6.5478e-08	0.490047	0.4353	-0.0547474	0.765302	3.96427	9.01384	5.04956	0.00148127	24	NO CHANGE	DELAY	DOWN
TC0800002314.mm.2	Klhl2	0.000604574	0.0276256	8.0625	7.24766	-0.814841	3.41683e-11	0.282342	0.265753	-0.0165896	0.899223	9.32278	10.4575	1.13473	0.526537	24	NO CHANGE	NO CHANGE	DOWN
TC0X00003438.mm.2	Zmat1	0.000605018	0.296216	6.8375	6.92391	0.0864087	0.438685	0.427484	0.121927	-0.305557	0.0559453	18.3358	14.0312	-4.30453	0.248126	24	NO CHANGE	NO CHANGE	NO CHANGE
TC1000003120.mm.2	Nab2	0.000605829	0.00508003	5.17958	5.15994	-0.0196429	0.882977	0.593055	0.358252	-0.234803	0.216812	1.32246	6.68185	5.35939	0.0025244	24	NO CHANGE	DELAY	NO CHANGE
TC1000000056.mm.2	Zc3h12d	0.000606831	0.104038	5.13542	4.805	-0.330417	0.00679673	0.390497	0.225017	-0.16548	0.315951	1.38316	6.049	4.66584	0.0492783	24	NO CHANGE	NO CHANGE	DOWN
TC1000002645.mm.2	Chpt1	0.000608363	0.0108245	14.2908	12.0433	-2.24756	1.98719e-20	0.453563	0.403747	-0.049816	0.785677	16.9285	15.1927	-1.73581	0.304467	24	NO CHANGE	NO CHANGE	DOWN
TC1300000763.mm.2	Mir23b; Mir27b; Mir24-1; 2010111I01Rik	0.000609141	0.256484	8.11375	9.23512	1.12137	5.50175e-14	0.321229	0.142445	-0.178784	0.221123	12.0843	9.80639	-2.27786	0.439274	24	NO CHANGE	NO CHANGE	UP
TC1200001880.mm.2	Sav1	0.000610533	0.000551832	7.75542	7.8146	0.0591865	0.439744	0.346251	0.255306	-0.0909452	0.399532	7.46041	6.2913	-1.16912	0.41594	24	NO CHANGE	NO CHANGE	NO CHANGE
TC0400001612.mm.2	Nr0b2	0.00061235	3.09333e-05	10.7004	9.04202	-1.65839	1.1422e-09	0.828231	1.1461	0.317872	0.290605	23.6961	2.65049	2.95443	0.018857	24	NO CHANGE	DELAY	DOWN
TC1200000789.mm.2	Gm29361; Rbm25	0.000615374	0.43807	6.16042	5.69272	-0.467698	0.00139753	0.322071	0.143398	-0.178673	0.363067	12.6906	11.8172	-0.873466	0.826714	24	NO CHANGE	NO CHANGE	DOWN
TC0100000055.mm.2	Prex2	0.000615544	0.000177412	7.0575	7.33919	0.281687	0.0175294	0.475023	0.488555	0.0135318	0.932675	12.8754	15.2229	2.34748	0.0758841	24	NO CHANGE	NO CHANGE	UP
TC0200003141.mm.2	Ssna1	0.000616402	0.459439	5.41458	5.40873	-0.00585318	0.954811	0.263514	0.101627	-0.161886	0.276587	17.6648	21.5104	3.84558	0.3526	24	NO CHANGE	NO CHANGE	NO CHANGE
TC1600001011.mm.2	Itsn1	0.00061694	0.228364	10.3475	10.411	0.0634722	0.502845	0.396154	0.112363	-0.283791	0.0407569	0.649947	22.0245	-2.62545	0.427936	24	DOWN	NO CHANGE	NO CHANGE
TC4_JH584293_random00000008.mm.2	Ccl19	0.000617001	0.522056	6.46625	6.44784	-0.0184127	0.869265	0.344259	0.0853098	-0.25895	0.103649	2.68429	15.108	-11.5763	0.0340447	24	NO CHANGE	NO CHANGE	NO CHANGE
TC0600001515.mm.2	Clec2h	0.000619783	0.548383	8.2325	4.13425	-4.09825	1.77503e-16	1.55583	0.114495	-1.44133	0.00211282	6.84494	20.6734	-10.1716	0.32603	24	DOWN	NO CHANGE	DOWN
TC0700001430.mm.2	Stard10	0.000622114	0.00056042	17.1621	17.0293	-0.132758	0.0101015	0.169928	0.223674	0.0537457	0.439415	13.7565	15.3909	1.63441	0.248564	24	NO CHANGE	NO CHANGE	DOWN
TC1200000874.mm.2	Samd15	0.000623421	0.539486	4.52875	4.31502	-0.21373	0.0527011	0.431761	0.0659179	-0.365843	0.0197158	23.4041	18.1693	-5.23478	0.418695	24	DOWN	NO CHANGE	NO CHANGE
TC1000001044.mm.2	Timp3	0.000624008	0.000128182	5.15875	5.94986	0.791111	1.99447e-05	0.585902	0.851019	0.265117	0.257321	12.7796	13.96	1.18047	0.368523	24	NO CHANGE	NO CHANGE	UP
TC1100001592.mm.2	Igfbp4	0.000624343	0.0441184	15.3946	15.8016	0.406984	1.11288e-07	0.251629	0.140553	-0.111076	0.227067	12.3738	11.1756	-1.19813	0.544054	24	NO CHANGE	NO CHANGE	UP
TC1500000408.mm.2	Fam83a	0.000625852	0.401822	4.65708	4.52296	-0.134127	0.319562	0.535887	0.111174	-0.424713	0.0278385	3.19211	4.76104	1.56893	0.746182	24	DOWN	NO CHANGE	NO CHANGE
TC0100003443.mm.2	Dcaf6	0.000626417	7.17216e-05	7.48417	8.58629	1.10212	2.44189e-10	0.514709	0.676823	0.162114	0.390117	6.84779	6.31359	-0.534204	0.667689	24	NO CHANGE	NO CHANGE	UP
TC0400003172.mm.2	Slc35d1	0.00062781	0.00588403	13.075	12.3765	-0.698492	5.28903e-08	0.407616	0.342882	-0.0647339	0.669129	8.78246	9.53254	0.750073	0.622852	24	NO CHANGE	NO CHANGE	DOWN
TC0500000488.mm.2	Lap3	0.000628777	4.29385e-05	15.6592	14.0238	-1.63536	6.53787e-24	0.246936	0.469874	0.222938	0.0457696	20.7263	19.7055	-1.02075	0.443889	24	UP	NO CHANGE	DOWN
TC1300002436.mm.2	Bhmt	0.000629826	4.85997e-05	17.5121	17.5371	0.025	0.854778	0.570385	0.660543	0.0901581	0.641169	22.9922	0.95192	1.95971	0.109712	24	NO CHANGE	NO CHANGE	NO CHANGE
TC1300000990.mm.2	Ccnh	0.000630118	0.0554431	10.8042	10.4564	-0.347718	1.50236e-05	0.240524	0.168575	-0.0719495	0.481664	19.2001	21.7873	2.58718	0.189073	24	NO CHANGE	NO CHANGE	DOWN
TC0700001673.mm.2	Insc	0.000630897	0.0011561	7.17167	7.95276	0.781091	0.000130767	0.897464	0.498104	-0.39936	0.137747	20.3926	20.5664	0.1738	0.914624	24	NO CHANGE	NO CHANGE	UP
TC0100000334.mm.2	Ercc5	0.000632304	0.113362	9.90042	10.6588	0.758373	1.39478e-08	0.383507	0.201501	-0.182006	0.24326	5.62563	9.2705	3.64488	0.11745	24	NO CHANGE	NO CHANGE	UP
TC0300001236.mm.2	F3	0.0006362	0.00776307	4.73833	5.22687	0.488532	0.000107261	0.44157	0.350441	-0.091129	0.57578	9.45503	12.6042	3.14914	0.0537055	24	NO CHANGE	NO CHANGE	UP
TC1500000432.mm.2	Sqle	0.000636336	0.0821354	10.6342	13.1838	2.54968	4.40033e-15	0.911729	0.342784	-0.568945	0.0610133	12.3163	16.6554	4.33912	0.100611	24	NO CHANGE	NO CHANGE	UP
TC1900001600.mm.2	Cuedc2	0.000636645	0.47147	6.22042	6.46778	0.247361	0.0174146	0.377426	0.0784475	-0.298979	0.0414855	17.6489	20.0947	2.44576	0.624366	24	DOWN	NO CHANGE	UP
TC1100001668.mm.2	Arl4d	0.000637538	0.303366	7.79167	8.09226	0.300595	0.0208339	0.452024	0.141729	-0.310295	0.0834419	16.5441	3.40402	10.86	0.00473621	24	NO CHANGE	NO CHANGE	UP
TC0400001975.mm.2	Rere	0.000637685	0.00016801	9.08917	9.42754	0.338373	0.00323406	0.484983	0.429719	-0.0552638	0.721678	7.70436	8.27396	0.569601	0.657688	24	NO CHANGE	NO CHANGE	UP
TC1800001149.mm.2	Fam13b	0.000642668	0.000283043	8.38458	8.23333	-0.15125	0.0687785	0.316455	0.355461	0.0390056	0.731981	0.913969	3.82083	2.90686	0.0332577	24	NO CHANGE	DELAY	NO CHANGE
TC1700001132.mm.2	Lpin2	0.000643205	0.000213226	13.0379	12.6724	-0.365516	0.0968973	0.842153	1.01266	0.170511	0.582106	8.49845	9.10159	0.603143	0.633523	24	NO CHANGE	NO CHANGE	NO CHANGE
TC1100000592.mm.2	Vdac1	0.000643266	0.00494647	12.5654	12.2427	-0.322698	3.20824e-05	0.238211	0.248494	0.0102832	0.916939	15.5715	7.50853	-8.06298	4.65019e-06	24	NO CHANGE	ADVANCE	DOWN
TC0100003869.mm.2	Tnni1	0.000645108	0.175362	2.6775	2.70258	0.0250794	0.795558	0.352247	0.14692	-0.205327	0.139252	14.2192	0.794446	10.5752	0.000370862	24	NO CHANGE	NO CHANGE	NO CHANGE
TC1600001617.mm.2	4930435E12Rik	0.00064635	0.224312	3.20833	3.27738	0.0690476	0.501151	0.337189	0.145619	-0.19157	0.187026	0.760216	2.38467	1.62445	0.587027	24	NO CHANGE	NO CHANGE	NO CHANGE
TC0100003836.mm.2	Hsd11b1	0.000647998	0.160275	16.7817	16.2213	-0.560377	1.01348e-06	0.253074	0.179574	-0.0735006	0.594749	18.3381	2.24432	7.90621	0.00384332	24	NO CHANGE	NO CHANGE	DOWN
TC0500002933.mm.2	Evi5	0.00065211	0.00117504	12.7479	12.4647	-0.283214	0.00197309	0.314696	0.344493	0.0297967	0.805372	0.862001	5.50016	4.63816	0.00216829	24	NO CHANGE	DELAY	DOWN
TC0600000362.mm.2	Trim24	0.000653544	3.36813e-06	9.63125	13.4448	3.81353	1.90543e-27	0.637596	0.774581	0.136985	0.500776	11.5371	5.68119	-5.85589	5.27569e-06	24	NO CHANGE	ADVANCE	UP
TC0400003163.mm.2	Gm12790	0.000654051	0.530722	3.6875	3.46891	-0.218591	0.012774	0.345797	0.0506558	-0.295141	0.0161039	0.503132	14.8439	-9.65927	0.150082	24	DOWN	NO CHANGE	DOWN
TC0600001793.mm.2	Tfpi2	0.000654741	0.00280195	11.7367	11.5448	-0.191885	0.120067	0.493576	0.410122	-0.0834546	0.631904	22.4029	21.8992	-0.503702	0.729459	24	NO CHANGE	NO CHANGE	NO CHANGE
TC0300000708.mm.2	Mrpl24	0.000655348	0.0682233	11.5187	11.1463	-0.37244	0.000474685	0.297336	0.223937	-0.0733994	0.595545	16.0107	15.2292	-0.781466	0.715476	24	NO CHANGE	NO CHANGE	DOWN
TC0200000459.mm.2	Surf2	0.000656418	0.00630979	8.7975	8.6454	-0.152103	0.178174	0.460492	0.317767	-0.142725	0.364321	14.7837	17.2752	2.49151	0.138275	24	NO CHANGE	NO CHANGE	NO CHANGE
TC0300002840.mm.2	Slc44a3	0.000657943	0.120277	8.19208	8.23927	0.0471825	0.610856	0.362649	0.148277	-0.214373	0.103644	9.03974	15.0397	5.99999	0.0275628	24	NO CHANGE	NO CHANGE	NO CHANGE
TC1100003340.mm.2	Tefm	0.00066131	0.0813942	8.45375	8.39605	-0.0576984	0.685871	0.580176	0.246387	-0.33379	0.0994932	16.7119	16.4535	-0.258327	0.916534	24	NO CHANGE	NO CHANGE	NO CHANGE
TC1200000744.mm.2	Susd6	0.000661377	0.0406751	8.48125	8.97407	0.492817	3.93972e-05	0.472271	0.204658	-0.267613	0.0855021	6.99776	12.372	5.37425	0.0179567	24	NO CHANGE	DELAY	UP
TC0400002271.mm.2	Wwp1	0.000662889	0.0573709	11.2812	11.7354	0.454167	3.29796e-07	0.306789	0.145519	-0.16127	0.134576	14.1078	12.9053	-1.20255	0.584712	24	NO CHANGE	NO CHANGE	UP
TC1400000945.mm.2	Trim35	0.000662918	0.418618	4.85958	4.99117	0.131587	0.14205	0.282638	0.0872864	-0.195351	0.127912	9.52083	22.3479	-11.173	0.00761576	24	NO CHANGE	NO CHANGE	NO CHANGE
TC1300001585.mm.2	Vmn1r191	0.000665278	0.0889546	3.64583	3.76704	0.12121	0.321212	0.3467	0.272701	-0.0739987	0.670486	7.84388	21.7268	-10.117	2.43502e-05	24	NO CHANGE	NO CHANGE	NO CHANGE
TC0900001210.mm.2	Tfdp2	0.00066678	0.2273	8.38667	8.33637	-0.0502976	0.693746	0.366351	0.197995	-0.168355	0.357379	7.21693	8.52994	1.31301	0.637167	24	NO CHANGE	NO CHANGE	NO CHANGE
TC0200000783.mm.2	Mbd5	0.000667793	0.00788503	9.01	9.39611	0.386111	0.00834886	0.650625	0.318761	-0.331864	0.10132	6.2162	7.84684	1.63065	0.385054	24	NO CHANGE	NO CHANGE	UP
TC1100003455.mm.2	Cltc	0.000668182	0.034264	15.6133	15.7651	0.151726	0.0184178	0.206261	0.161149	-0.0451122	0.607801	6.04009	6.6681	0.628003	0.738553	24	NO CHANGE	NO CHANGE	UP
TC0800001106.mm.2	Herpud1	0.000673537	1.32194e-05	16.745	16.2458	-0.499187	0.00105813	0.532501	0.877124	0.344623	0.0965126	10.5454	9.83338	-0.712026	0.547735	24	NO CHANGE	NO CHANGE	DOWN
TC1300000089.mm.2	Lyst	0.000674299	0.0455571	8.90917	9.22788	0.31871	0.0183893	0.436696	0.314092	-0.122605	0.505801	15.1736	13.8323	-1.34123	0.498475	24	NO CHANGE	NO CHANGE	UP
TC0100002838.mm.2	Dtymk	0.000676455	0.000361431	8.50625	8.31141	-0.194841	0.021076	0.291955	0.376889	0.0849341	0.461094	17.83	17.9296	0.0996458	0.941367	24	NO CHANGE	NO CHANGE	DOWN
TC0900000876.mm.2	Rps27l	0.000677376	7.6881e-05	12.5883	11.9219	-0.666468	8.49644e-11	0.314209	0.370874	0.0566657	0.605943	20.3042	19.1584	-1.1458	0.354497	24	NO CHANGE	NO CHANGE	DOWN
TC0900003058.mm.2	Tcta	0.000677644	0.224892	5.88625	5.87395	-0.0123017	0.906379	0.389707	0.141037	-0.24867	0.102091	20.0082	21.7849	1.77673	0.551579	24	NO CHANGE	NO CHANGE	NO CHANGE
TC0700003778.mm.2	Tsku	0.00067769	1.04684e-05	11.8121	14.2333	2.42117	8.95408e-08	1.96496	0.909453	-1.05551	0.0509251	15.435	14.142	-1.29304	0.466793	24	NO CHANGE	NO CHANGE	UP
TC1200000239.mm.2	Tssc1	0.00067875	0.325382	7.46333	7.40784	-0.055496	0.588155	0.343527	0.118296	-0.225232	0.126807	20.8597	0.137132	3.27743	0.350803	24	NO CHANGE	NO CHANGE	NO CHANGE
TC1200001051.mm.2	Glrx5	0.00068484	0.235907	11.3575	11.2832	-0.0743452	0.41618	0.314726	0.124992	-0.189734	0.147499	14.2279	19.6758	5.44791	0.0748682	24	NO CHANGE	NO CHANGE	NO CHANGE
TC0400000529.mm.2	Nr4a3	0.000687948	0.00598217	3.23542	3.68569	0.450278	1.64163e-06	0.298526	0.269483	-0.0290435	0.80185	14.9803	11.0675	-3.91283	0.0139033	24	NO CHANGE	ADVANCE	UP
TC0800000252.mm.2	Gm15315	0.000688426	0.032949	3.11667	2.82619	-0.290476	0.0233063	0.407647	0.319878	-0.0877681	0.613671	1.60029	4.93621	3.33592	0.0865533	24	NO CHANGE	NO CHANGE	DOWN
TC1800000825.mm.2	Pias2	0.000688908	0.00363452	11.7525	11.544	-0.208512	0.00920456	0.281184	0.273509	-0.00767594	0.944036	9.1197	11.6537	2.53401	0.0933431	24	NO CHANGE	NO CHANGE	DOWN
TC1700000353.mm.2	Meiob	0.000688909	0.0254571	7.99083	8.49738	0.506548	0.00802663	0.698034	0.444297	-0.253737	0.324033	5.57657	3.39775	-2.17882	0.255715	24	NO CHANGE	NO CHANGE	UP
TC0400000963.mm.2	Hook1	0.000689533	0.00543897	13.9183	13.3877	-0.530615	1.42584e-08	0.251853	0.263428	0.0115749	0.912988	10.9964	15.964	4.96769	0.00339376	24	NO CHANGE	DELAY	DOWN
TC1200002389.mm.2	Hsp90aa1	0.00069089	0.000859269	14.1679	14.7805	0.612619	0.0294649	1.17928	0.9462	-0.23308	0.548301	18.3558	19.4451	1.08928	0.442417	24	NO CHANGE	NO CHANGE	UP
TC0700003798.mm.2	Rps3; Snord15b	0.000693899	0.00173011	13.9033	14.0098	0.106508	0.13434	0.298129	0.225799	-0.0723303	0.464567	16.7576	17.8732	1.1156	0.460238	24	NO CHANGE	NO CHANGE	NO CHANGE
TC0200005365.mm.2	Gm14418	0.000694381	0.00121384	13.3571	13.1721	-0.18502	0.110784	0.514304	0.341256	-0.173049	0.281911	16.4809	16.4201	-0.0607834	0.969019	24	NO CHANGE	NO CHANGE	NO CHANGE
TC1000001555.mm.2	Dctn2	0.000695499	0.00034322	10.4775	10.4852	0.0077381	0.924342	0.289555	0.383591	0.0940353	0.416686	7.87356	7.11852	-0.755039	0.574343	24	NO CHANGE	NO CHANGE	NO CHANGE
TC0700004580.mm.2	Kcnq1ot1	0.0006994	0.0056746	6.53	6.78778	0.257778	0.0754061	0.616818	0.380975	-0.235842	0.243226	14.6648	18.4618	3.79702	0.0293334	24	NO CHANGE	DELAY	NO CHANGE
TC0400001732.mm.2	Pla2g2c	0.000700359	0.336336	4.1775	4.00188	-0.175615	0.167532	0.417124	0.138384	-0.27874	0.118495	21.3358	3.3523	6.01651	0.115266	24	NO CHANGE	NO CHANGE	NO CHANGE
TC0900002233.mm.2	Nxpe2	0.000701411	0.022185	11.2363	11.5462	0.30996	0.0224536	0.418893	0.378644	-0.0402486	0.828227	6.19753	6.5854	0.387877	0.828932	24	NO CHANGE	NO CHANGE	UP
TC0100003838.mm.2	G0s2	0.000702715	0.0500797	9.825	7.97018	-1.85482	1.22573e-05	1.72121	0.597721	-1.12348	0.0377619	17.3433	14.4504	-2.89295	0.269023	24	DOWN	NO CHANGE	DOWN
TC1300000829.mm.2	Zfp493	0.000704301	0.00856205	5.3825	5.23938	-0.143115	0.348953	0.523375	0.486635	-0.0367405	0.863276	17.5937	17.6683	0.0746618	0.96376	24	NO CHANGE	NO CHANGE	NO CHANGE
TC1300000514.mm.2	Jarid2	0.000704632	0.00377083	7.39	8.1973	0.807302	1.99538e-07	0.519401	0.415678	-0.103723	0.572923	12.8245	13.5114	0.686867	0.656509	24	NO CHANGE	NO CHANGE	UP
TC1600000447.mm.2	Tfrc	0.000704851	0.0139121	8.14583	8.45669	0.310853	0.0907366	0.814126	0.391581	-0.422545	0.103168	18.4037	18.8233	0.419631	0.831513	24	NO CHANGE	NO CHANGE	NO CHANGE
TC0400002568.mm.2	Zbtb5	0.000704908	0.131202	5.64167	5.95325	0.311587	0.00704186	0.4121	0.180017	-0.232083	0.140226	16.0348	17.8746	1.8398	0.481528	24	NO CHANGE	NO CHANGE	UP
TC0900000810.mm.2	Rpl4	0.000705737	0.0389865	16.7446	16.7558	0.0112103	0.850181	0.16247	0.15998	-0.00249044	0.976093	15.8726	14.8674	-1.00528	0.617163	24	NO CHANGE	NO CHANGE	NO CHANGE
TC0200000407.mm.2	Tmem210	0.000707845	0.064837	3.12583	2.8052	-0.320635	0.00363082	0.283917	0.24903	-0.034887	0.811389	9.67922	3.69962	-5.9796	0.00816068	24	NO CHANGE	NO CHANGE	DOWN
TC1200001768.mm.2	Nfkbia	0.000709952	1.03014e-05	8.7775	8.86843	0.0909325	0.524102	0.588211	0.796196	0.207985	0.310291	8.60042	9.92729	1.32687	0.246773	24	NO CHANGE	NO CHANGE	NO CHANGE
TC0900001486.mm.2	Epm2aip1	0.000710028	0.225034	8.17958	8.36927	0.189683	0.253266	0.466228	0.247635	-0.218594	0.344976	16.2152	15.8938	-0.321387	0.91315	24	NO CHANGE	NO CHANGE	NO CHANGE
TC0300003103.mm.2	Dnase2b	0.000710311	0.0010872	9.60125	7.80843	-1.79282	5.38574e-15	0.393465	0.70968	0.316215	0.138428	15.5255	14.8748	-0.650758	0.69636	24	NO CHANGE	NO CHANGE	DOWN
TC1500000580.mm.2	Grina	0.000711899	0.0533911	8.24542	8.09538	-0.15004	0.149007	0.396361	0.215224	-0.181137	0.218205	13.9096	12.3325	-1.5771	0.448459	24	NO CHANGE	NO CHANGE	NO CHANGE
TC1000002541.mm.2	Nfic	0.000718467	0.121271	8.95292	8.79504	-0.157877	0.243755	0.569619	0.192085	-0.377535	0.0501875	16.1034	17.3379	1.23453	0.669471	24	NO CHANGE	NO CHANGE	NO CHANGE
TC0100002411.mm.2	Wdr12	0.000720529	0.00157941	9.34292	9.34079	-0.00212302	0.98486	0.394843	0.441105	0.0462621	0.76854	16.0766	17.7806	1.70396	0.246961	24	NO CHANGE	NO CHANGE	NO CHANGE
TC0800001089.mm.2	Ogfod1	0.000720949	0.000271159	9.68417	9.74615	0.0619841	0.464329	0.375475	0.30346	-0.0720143	0.544672	16.2673	17.8525	1.5852	0.254672	24	NO CHANGE	NO CHANGE	NO CHANGE
TC1700002420.mm.2	Ankrd12	0.000724331	0.000410835	8.42542	8.13587	-0.289544	0.014086	0.505206	0.391405	-0.113802	0.477192	12.916	14.1204	1.20438	0.397611	24	NO CHANGE	NO CHANGE	DOWN
TC1900001705.mm.2	Dclre1a	0.000724485	0.00104423	8.03583	7.5919	-0.443929	0.000218478	0.447949	0.395848	-0.0521011	0.736135	12.4702	14.4507	1.98054	0.17186	24	NO CHANGE	NO CHANGE	DOWN
TC1800000098.mm.2	Riok3	0.000724775	0.00319606	10.2246	10.117	-0.107619	0.149487	0.261671	0.270741	0.00906938	0.930928	14.0211	12.3811	-1.64002	0.274721	24	NO CHANGE	NO CHANGE	NO CHANGE
TC1300000255.mm.2	Hist1h2bc	0.000726357	0.336025	14.6621	14.5823	-0.0797421	0.345163	0.284613	0.091957	-0.192656	0.108245	22.4173	17.8986	-4.51867	0.231468	24	NO CHANGE	NO CHANGE	NO CHANGE
TC1600000670.mm.2	Atg3	0.00072653	0.239792	12.4563	12.0433	-0.412917	4.51846e-06	0.27074	0.108304	-0.162435	0.153756	16.4952	21.3349	4.83969	0.107233	24	NO CHANGE	NO CHANGE	DOWN
TC1200000626.mm.2	Ppm1a	0.000730106	0.00200122	11.5087	11.2058	-0.302996	0.00248642	0.272836	0.418558	0.145722	0.284808	8.88284	9.74955	0.866709	0.579732	24	NO CHANGE	NO CHANGE	DOWN
TC0100000315.mm.2	Mrps9	0.000731485	0.139282	9.04792	8.62097	-0.426944	0.000305896	0.325887	0.201016	-0.12487	0.419029	8.19055	6.88088	-1.30966	0.593093	24	NO CHANGE	NO CHANGE	DOWN
TC0X00002433.mm.2	Bcap31	0.000733763	0.00139028	14.1417	13.8878	-0.253849	4.02807e-05	0.203641	0.213821	0.0101804	0.895789	17.126	15.0948	-2.03123	0.166727	24	NO CHANGE	NO CHANGE	DOWN
TC1200001926.mm.2	Gm11042	0.000737581	0.183536	7.78958	7.84764	0.0580556	0.742386	0.673539	0.249744	-0.423796	0.0960162	1.22108	0.560685	-0.660393	0.819377	24	NO CHANGE	NO CHANGE	NO CHANGE
TC0500000837.mm.2	5830473C10Rik	0.00073779	0.0321692	11.4546	9.01567	-2.43891	1.2166e-21	0.398894	0.357243	-0.0416507	0.821891	5.89639	6.01065	0.114258	0.952113	24	NO CHANGE	NO CHANGE	DOWN
TC1800001043.mm.2	Dsc2	0.000740166	3.39802e-05	9.85792	10.0674	0.209484	0.194567	0.659871	0.795469	0.135598	0.55078	6.37659	7.5694	1.19281	0.321563	24	NO CHANGE	NO CHANGE	NO CHANGE
TC0200005023.mm.2	Blcap	0.000740274	0.00998562	6.21958	6.25661	0.0370238	0.765439	0.450149	0.378071	-0.0720779	0.681831	22.7957	0.784866	1.98915	0.228536	24	NO CHANGE	NO CHANGE	NO CHANGE
TC1000001282.mm.2	E2f7	0.000741394	0.125388	3.95833	4.1399	0.181567	0.068424	0.392148	0.153916	-0.238231	0.0934676	0.142084	10.5572	10.4151	0.000208371	24	NO CHANGE	NO CHANGE	NO CHANGE
TC0400003957.mm.2	Tnfrsf1b	0.000742219	0.0404855	8.05083	7.99786	-0.0529762	0.683928	0.433218	0.325756	-0.107462	0.561339	7.88242	12.283	4.40055	0.0250018	24	NO CHANGE	DELAY	NO CHANGE
TC0500002723.mm.2	Ankrd17	0.000744452	0.0257321	11.8146	11.9514	0.136845	0.0964883	0.289257	0.213365	-0.0758921	0.511062	10.0953	11.9137	1.81837	0.313281	24	NO CHANGE	NO CHANGE	NO CHANGE
TC0900002213.mm.2	Sidt2	0.000749656	0.0215153	12.6996	13.6	0.900417	3.02766e-11	0.342409	0.276318	-0.0660909	0.640165	12.1674	14.7328	2.56537	0.162343	24	NO CHANGE	NO CHANGE	UP
TC1600000532.mm.2	Rabl3	0.000749685	0.0189357	9.105	9.05383	-0.0511706	0.612737	0.3482	0.291035	-0.0571652	0.691882	18.4045	20.8558	2.4513	0.156936	24	NO CHANGE	NO CHANGE	NO CHANGE
TC1000001601.mm.2	Ankrd52; Mir6914	0.000749959	0.0493709	6.73292	7.13319	0.400278	0.00101691	0.397614	0.266682	-0.130931	0.422369	5.73634	11.0575	5.32114	0.00876029	24	NO CHANGE	DELAY	UP
TC1100002863.mm.2	Cops3	0.000751264	0.0521981	10.0867	10.1979	0.11119	0.123002	0.277122	0.142959	-0.134162	0.181644	5.78104	3.44458	-2.33646	0.288754	24	NO CHANGE	NO CHANGE	NO CHANGE
TC1500002309.mm.2	Cbx5	0.000751885	0.0496946	8.71625	8.88163	0.165377	0.0836805	0.31538	0.216406	-0.0989736	0.452532	16.0151	15.2435	-0.771633	0.706369	24	NO CHANGE	NO CHANGE	NO CHANGE
TC0200003751.mm.2	Ola1	0.000756186	0.000917231	7.77625	7.50968	-0.266567	0.00189356	0.311351	0.32363	0.0122786	0.915362	16.1687	22.2899	6.12114	4.98792e-05	24	NO CHANGE	DELAY	DOWN
TC0700003909.mm.2	Hbb-bs; Hbb-b1	0.00075619	0.0910674	15.6542	17.1569	1.5027	4.09557e-07	1.1137	0.369076	-0.74462	0.041657	18.3893	19.4176	1.02836	0.708958	24	DOWN	NO CHANGE	UP
TC0600002494.mm.2	Elmod3	0.000756827	0.00749099	10.0925	10.006	-0.0864683	0.558272	0.525659	0.466071	-0.0595882	0.773189	19.1885	17.415	-1.77355	0.280631	24	NO CHANGE	NO CHANGE	NO CHANGE
TC0600001970.mm.2	Rbm28	0.000758366	0.000498142	6.25208	6.26224	0.0101587	0.906143	0.324494	0.360221	0.0357269	0.766821	16.8707	15.9106	-0.960174	0.487053	24	NO CHANGE	NO CHANGE	NO CHANGE
TC0X00000974.mm.2	Nono	0.000760368	0.00812781	11.2796	11.5924	0.312798	0.000959159	0.281537	0.297285	0.0157482	0.898985	12.6189	17.5139	4.89497	0.00510293	24	NO CHANGE	DELAY	UP
TC1100003829.mm.2	Hdac5; Mir8101	0.000763946	0.000333499	6.55	6.95306	0.403056	0.0002284	0.376749	0.456188	0.0794396	0.579806	19.759	20.7064	0.947385	0.469961	24	NO CHANGE	NO CHANGE	UP
TC1300000359.mm.2	Wrnip1	0.000765285	0.200029	8.76542	8.41502	-0.350397	0.00428812	0.505285	0.130161	-0.375124	0.0260131	21.1249	2.63731	5.51237	0.133772	24	DOWN	NO CHANGE	DOWN
TC1100000565.mm.2	Clk4	0.000768123	0.000859236	10.8692	10.8934	0.0242262	0.812747	0.48283	0.284356	-0.198474	0.179425	10.6888	10.4958	-0.193041	0.902525	24	NO CHANGE	NO CHANGE	NO CHANGE
TC1000000842.mm.2	Midn	0.000768632	0.0217925	9.75667	9.8344	0.0777381	0.59789	0.605945	0.333384	-0.272561	0.190347	5.4108	3.05891	-2.35189	0.235622	24	NO CHANGE	NO CHANGE	NO CHANGE
TC1000000919.mm.2	AU041133	0.000771877	0.0986527	4.9625	4.80692	-0.155575	0.362213	0.513092	0.349236	-0.163856	0.495425	13.2538	13.3866	0.132723	0.953257	24	NO CHANGE	NO CHANGE	NO CHANGE
TC0500003097.mm.2	Cox6a1	0.000772299	0.0176487	18.4071	18.591	0.183929	0.000870471	0.2034	0.13351	-0.0698899	0.345595	22.8889	21.7727	-1.11619	0.522897	24	NO CHANGE	NO CHANGE	UP
TC0800001110.mm.2	Nlrc5; Mir7072	0.000774015	0.53586	5.54167	5.55038	0.00871032	0.953648	0.586786	0.0949358	-0.49185	0.0256862	7.14946	20.6045	-10.545	0.0880653	24	DOWN	NO CHANGE	NO CHANGE
TC0Y00000212.mm.2	Sly	0.000774325	0.132353	6.63833	4.58159	-2.05675	5.19624e-10	0.945851	0.414611	-0.531239	0.144497	1.97668	2.52146	0.544776	0.836109	24	NO CHANGE	NO CHANGE	DOWN
TC0300002103.mm.2	Ccnl1	0.000775185	0.133276	10.6142	10.6631	0.0489484	0.620661	0.338099	0.174324	-0.163776	0.248347	3.47109	11.6478	8.1767	0.00152641	24	NO CHANGE	NO CHANGE	NO CHANGE
TC1900001026.mm.2	Fkbp2	0.000776884	0.0022897	9.3925	9.15238	-0.240119	0.0784762	0.468825	0.50675	0.0379254	0.840509	20.3433	18.1889	-2.15442	0.15364	24	NO CHANGE	NO CHANGE	NO CHANGE
TC1600002094.mm.2	Rcan1	0.000778387	6.96801e-05	10.1662	11.0917	0.925496	0.000596005	1.13045	0.957387	-0.173059	0.621296	14.7709	15.7611	0.990179	0.45752	24	NO CHANGE	NO CHANGE	UP
TC1700001644.mm.2	Fahd1	0.000780297	0.268386	6.76458	5.96571	-0.798869	8.22732e-10	0.426794	0.103805	-0.322988	0.0289379	19.7388	7.27951	11.5407	0.0045206	24	DOWN	NO CHANGE	DOWN
TC1800001429.mm.2	Grpel2	0.000781606	0.00514031	5.82333	5.08062	-0.742718	3.6589e-08	0.484443	0.290999	-0.193444	0.220549	7.01331	7.0016	-0.0117136	0.994512	24	NO CHANGE	NO CHANGE	DOWN
TC0300002580.mm.2	Wdr3	0.000782901	0.184084	7.9375	7.80621	-0.13129	0.224392	0.429038	0.14275	-0.286288	0.0652409	16.1558	12.3226	-3.8332	0.209648	24	NO CHANGE	NO CHANGE	NO CHANGE
TC1600001259.mm.2	Dnm1l	0.000786682	0.00149011	11.5313	11.8286	0.297361	0.000717501	0.247867	0.365256	0.117389	0.318254	20.457	21.2403	0.783307	0.603635	24	NO CHANGE	NO CHANGE	UP
TC1100002131.mm.2	Kremen1	0.000791577	0.371543	6.45417	6.532	0.0778373	0.406686	0.392347	0.0781056	-0.314241	0.0224908	7.02397	8.74211	1.71814	0.710533	24	DOWN	NO CHANGE	NO CHANGE
TC0200004076.mm.2	Olfr1264	0.000791736	0.0975887	4.37167	4.21633	-0.155337	0.117002	0.402411	0.159115	-0.243296	0.0859305	23.3282	23.5872	0.259012	0.917711	24	NO CHANGE	NO CHANGE	NO CHANGE
TC1300001737.mm.2	Exoc2	0.000792341	0.613772	9.06208	9.22052	0.158433	0.12068	0.27352	0.0649073	-0.208612	0.150451	8.00584	8.2392	0.233361	0.96931	24	NO CHANGE	NO CHANGE	NO CHANGE
TC1200001869.mm.2	Sos2	0.000792417	0.00801856	10.6475	10.725	0.0775397	0.59669	0.54832	0.453593	-0.094727	0.650888	8.26146	10.7834	2.52192	0.116378	24	NO CHANGE	NO CHANGE	NO CHANGE
TC1200001663.mm.2	Ifrd1	0.000794242	5.45951e-05	7.47125	9.54308	2.07183	8.56176e-15	0.580974	1.04235	0.461375	0.0724867	11.3671	10.9649	-0.402151	0.759369	24	NO CHANGE	NO CHANGE	UP
TC0800000542.mm.2	Irf2	0.000797088	0.0280408	10.0904	9.95264	-0.137778	0.186584	0.449167	0.20782	-0.241347	0.105053	7.09509	12.363	5.26789	0.0152385	24	NO CHANGE	DELAY	NO CHANGE
TC1100000601.mm.2	Aff4	0.000797518	0.00460844	13.1429	12.9371	-0.205833	0.0167054	0.299034	0.285788	-0.0132452	0.910668	7.38528	7.98886	0.603581	0.692722	24	NO CHANGE	NO CHANGE	DOWN
TC0700002980.mm.2	Prmt1	0.000797969	0.080854	8.26042	8.19107	-0.0693452	0.540513	0.339329	0.246957	-0.0923721	0.563244	17.2809	13.4012	-3.87971	0.0803437	24	NO CHANGE	NO CHANGE	NO CHANGE
TC1400000071.mm.2	Flnb	0.000798565	0.0388855	11.2883	11.2004	-0.0879167	0.391517	0.375033	0.237392	-0.137641	0.343491	12.3869	12.9414	0.554551	0.776635	24	NO CHANGE	NO CHANGE	NO CHANGE
TC1600000249.mm.2	Cldn5	0.0008016	0.253142	5.38208	5.18504	-0.197044	0.156131	0.582409	0.140545	-0.441864	0.0262459	17.8722	2.13546	8.26324	0.0401436	24	DOWN	NO CHANGE	NO CHANGE
TC1300001382.mm.2	Akr1c20	0.000802102	0.370054	12.8742	13.0271	0.152937	0.0938563	0.360432	0.0800314	-0.2804	0.0333154	17.4474	8.88188	-8.56553	0.0543633	24	DOWN	NO CHANGE	NO CHANGE
TC0200000477.mm.2	Rxra	0.000803756	0.00336407	12.5183	12.372	-0.14629	0.111444	0.31628	0.334371	0.0180909	0.88854	8.97677	11.3732	2.39648	0.113424	24	NO CHANGE	NO CHANGE	NO CHANGE
TC0Y00000319.mm.2	Gm20896	0.000804091	0.408717	7.24958	6.30948	-0.940099	0.000938979	0.96145	0.233752	-0.727699	0.0558288	2.23813	2.52337	0.285241	0.950291	24	NO CHANGE	NO CHANGE	DOWN
TC1100004071.mm.2	Atp5h	0.000804148	0.240693	16.3762	16.7343	0.358095	1.37719e-09	0.193382	0.0517887	-0.141593	0.0374073	17.9145	23.0235	5.10908	0.150666	24	DOWN	NO CHANGE	UP
TC0500002676.mm.2	Uba6	0.00080668	0.0349015	8.46292	8.64474	0.181825	0.127614	0.413085	0.293456	-0.119629	0.476332	18.8136	20.1323	1.31868	0.481857	24	NO CHANGE	NO CHANGE	NO CHANGE
TC0900001445.mm.2	Map4	0.000808829	0.130518	9.06125	9.05887	-0.00238095	0.981347	0.357551	0.178479	-0.179072	0.222952	6.92653	10.6361	3.70958	0.129139	24	NO CHANGE	NO CHANGE	NO CHANGE
TC0700003908.mm.2	Hbb-bt; Hbb-b2	0.00081134	0.073665	15.7321	17.1041	1.37206	1.43609e-06	1.07971	0.380628	-0.699083	0.049236	18.4016	19.2379	0.836341	0.750117	24	DOWN	NO CHANGE	UP
TC1400001105.mm.2	Elf1	0.000814957	0.0168065	10.6225	10.8875	0.26498	0.00632833	0.367586	0.230426	-0.13716	0.294757	3.72265	5.67719	1.95453	0.291593	24	NO CHANGE	NO CHANGE	UP
TC0400002113.mm.2	Gm20782	0.000815571	0.768254	3.73417	3.6044	-0.129762	0.457543	0.543428	0.0621365	-0.481292	0.0585711	19.0743	21.3761	2.30185	0.829056	24	NO CHANGE	NO CHANGE	NO CHANGE
TC1100001331.mm.2	Trim37	0.000817504	0.369783	6.85083	6.68012	-0.170714	0.123205	0.339476	0.114736	-0.22474	0.14599	19.4211	16.4249	-2.99619	0.449383	24	NO CHANGE	NO CHANGE	NO CHANGE
TC0X00003057.mm.2	Serpina7	0.000818586	0.240275	10.4037	4.97159	-5.43216	1.58748e-25	0.90721	0.272952	-0.634258	0.0572797	5.18558	13.1839	7.99836	0.023278	24	NO CHANGE	NO CHANGE	DOWN
TC0800001265.mm.2	Cyb5b	0.000827475	0.0465334	16.1329	15.8601	-0.272778	0.000321454	0.205857	0.181455	-0.0244016	0.806818	21.6513	23.157	1.50564	0.439918	24	NO CHANGE	NO CHANGE	DOWN
TC1700000026.mm.2	Arid1b	0.000827615	0.0755698	6.51125	6.31157	-0.199683	0.0505869	0.438105	0.157091	-0.281014	0.0542102	1.22709	22.4397	-2.78742	0.27744	24	NO CHANGE	NO CHANGE	NO CHANGE
TC0100000456.mm.2	Nop58	0.000827675	0.000267626	9.30375	9.40536	0.101607	0.505907	0.637646	0.595895	-0.0417512	0.845461	15.3555	14.0086	-1.34689	0.319871	24	NO CHANGE	NO CHANGE	NO CHANGE
TC1100002611.mm.2	Timd2	0.000827749	0.277537	15.4242	15.6239	0.199742	0.00602704	0.190022	0.0959122	-0.0941098	0.340542	18.058	19.1191	1.06103	0.733395	24	NO CHANGE	NO CHANGE	UP
TC0100003893.mm.2	Ahctf1	0.000828047	4.05245e-05	8.23667	7.69992	-0.536746	1.62168e-05	0.471572	0.491089	0.0195169	0.899507	18.5514	15.6743	-2.87712	0.0261399	24	NO CHANGE	ADVANCE	DOWN
TC1100000200.mm.2	Sertad2	0.000830294	0.17479	6.65958	6.74607	0.0864881	0.422052	0.379794	0.166101	-0.213694	0.168183	5.18827	11.0074	5.81915	0.0339781	24	NO CHANGE	NO CHANGE	NO CHANGE
TC1000001802.mm.2	Abracl	0.000833228	0.106283	8.58833	8.60038	0.0120436	0.923036	0.377774	0.246667	-0.131107	0.455475	5.07145	5.78863	0.717186	0.759186	24	NO CHANGE	NO CHANGE	NO CHANGE
TC1700000323.mm.2	Srrm2	0.000833529	0.174128	15.0363	15.1696	0.133373	0.107183	0.345387	0.0987928	-0.246594	0.035492	5.20411	5.12459	-0.0795174	0.981152	24	DOWN	NO CHANGE	NO CHANGE
TC1300002382.mm.2	Cox7c	0.000834944	0.187539	18.6	18.6893	0.0892857	0.0282755	0.153324	0.0523093	-0.101015	0.0733614	17.6037	17.0025	-0.601271	0.847695	24	NO CHANGE	NO CHANGE	UP
TC1000002487.mm.2	Tmem259	0.000836764	0.0030184	12.9225	13.0431	0.120615	0.121229	0.343075	0.208354	-0.134721	0.22366	7.54429	10.0132	2.46894	0.13417	24	NO CHANGE	NO CHANGE	NO CHANGE
TC0200001583.mm.2	Pax6	0.00083698	0.613288	4.73667	4.64048	-0.0961905	0.335849	0.328186	0.0590475	-0.269138	0.0638535	16.3351	9.99996	-6.3351	0.329264	24	NO CHANGE	NO CHANGE	NO CHANGE
TC0900002613.mm.2	Tcf12	0.000840542	0.0206046	10.0733	10.7592	0.685853	4.89117e-09	0.332014	0.258792	-0.0732222	0.585023	8.05753	9.90412	1.8466	0.289266	24	NO CHANGE	NO CHANGE	UP
TC1900001617.mm.2	Nt5c2	0.000847082	0.240534	8.69	9.19214	0.502143	8.13973e-05	0.434361	0.14327	-0.291091	0.0809298	13.8857	7.37352	-6.51223	0.0509689	24	NO CHANGE	NO CHANGE	UP
TC0200004940.mm.2	Snta1	0.000847197	0.102611	6.43917	6.13679	-0.302381	0.00290936	0.285954	0.192022	-0.0939313	0.485707	15.4414	15.5228	0.081337	0.97236	24	NO CHANGE	NO CHANGE	DOWN
TC1300001017.mm.2	Rps23	0.000848022	0.0381146	16.6817	16.6719	-0.00980159	0.83699	0.158826	0.116188	-0.042638	0.522998	16.1002	16.4249	0.324644	0.869467	24	NO CHANGE	NO CHANGE	NO CHANGE
TC0200004316.mm.2	Gm15130	0.00084986	0.255135	3.02042	3.1081	0.0876786	0.392713	0.40609	0.112313	-0.293777	0.0448117	14.9115	3.44744	-11.464	0.00342655	24	DOWN	NO CHANGE	NO CHANGE
TC0900001858.mm.2	Tyk2	0.000851249	0.0559523	8.59917	8.94694	0.347778	0.00349042	0.36902	0.256044	-0.112976	0.476572	2.97418	5.37638	2.4022	0.25234	24	NO CHANGE	NO CHANGE	UP
TC1800001461.mm.2	Fech	0.00085145	0.000559042	12.0929	10.9655	-1.12744	9.06006e-21	0.242231	0.274142	0.0319118	0.728611	10.4105	10.1006	-0.30992	0.816626	24	NO CHANGE	NO CHANGE	DOWN
TC0100002604.mm.2	Tuba4a	0.000852912	0.00870646	12.7033	12.3707	-0.332599	0.0593009	0.601672	0.5584	-0.0432721	0.860817	22.9774	22.2816	-0.695716	0.662341	24	NO CHANGE	NO CHANGE	NO CHANGE
TC1500002076.mm.2	Slc2a13	0.000853053	0.157429	5.9175	5.92974	0.0122421	0.877498	0.271845	0.131201	-0.140644	0.219159	13.141	11.0861	-2.05484	0.421239	24	NO CHANGE	NO CHANGE	NO CHANGE
TC0700002020.mm.2	Olfr45	0.000854854	0.667642	4.02792	3.78131	-0.246607	0.0487646	0.426148	0.0585719	-0.367576	0.0392886	3.09523	19.9224	-7.17286	0.375004	24	DOWN	NO CHANGE	DOWN
TC0400001107.mm.2	Dhcr24	0.000858242	0.000715377	16.1504	17.524	1.37357	1.22994e-20	0.362348	0.230859	-0.131489	0.243115	11.9297	12.8804	0.950613	0.541779	24	NO CHANGE	NO CHANGE	UP
TC1500001302.mm.2	Trio	0.0008606	0.398823	4.98583	4.95532	-0.0305159	0.782822	0.379213	0.107116	-0.272097	0.09064	2.51037	20.8504	-5.65999	0.169083	24	NO CHANGE	NO CHANGE	NO CHANGE
TC0600003457.mm.2	Ergic2	0.00086274	0.00654683	14.4112	14.4266	0.0153968	0.856836	0.372545	0.218272	-0.154273	0.210596	11.1339	9.60782	-1.52609	0.374773	24	NO CHANGE	NO CHANGE	NO CHANGE
TC0X00000649.mm.2	Mtm1	0.000864974	0.00388743	5.67375	5.32389	-0.349861	0.0166085	0.459924	0.520374	0.0604503	0.761145	3.61176	6.53502	2.92326	0.0671066	24	NO CHANGE	NO CHANGE	DOWN
TC1100000975.mm.2	Mis12	0.000865163	0.00326828	9.08542	8.623	-0.462421	0.00127538	0.575616	0.375844	-0.199772	0.291221	14.1006	15.6837	1.58307	0.34458	24	NO CHANGE	NO CHANGE	DOWN
TC0400001783.mm.2	Arhgef19	0.000865779	0.00914362	7.59833	7.40849	-0.189841	0.154158	0.510419	0.377657	-0.132761	0.478867	20.1029	19.7739	-0.329005	0.842091	24	NO CHANGE	NO CHANGE	NO CHANGE
TC1000001133.mm.2	Hal	0.000869071	4.81205e-06	14.6021	13.96	-0.642103	1.53039e-05	0.51772	0.781199	0.263479	0.159633	0.422017	2.17314	1.75112	0.138349	24	NO CHANGE	NO CHANGE	DOWN
TC1500000423.mm.2	Ndufb9	0.000869858	0.803076	16.2604	16.3707	0.110278	0.152231	0.31239	0.0178363	-0.294554	0.00914632	18.6473	23.7619	5.1146	0.753456	24	DOWN	NO CHANGE	NO CHANGE
TC0700004548.mm.2	Tollip	0.00087271	0.101814	9.04	9.36359	0.323591	0.000231365	0.304409	0.143019	-0.161389	0.166159	10.8863	11.0742	0.187879	0.936531	24	NO CHANGE	NO CHANGE	UP
TC0400002016.mm.2	Acot7	0.00087554	0.00527153	6.83625	6.95845	0.122202	0.168308	0.378829	0.225883	-0.152946	0.217149	13.5917	17.1044	3.5127	0.051259	24	NO CHANGE	NO CHANGE	NO CHANGE
TC1500000587.mm.2	Cyc1	0.000876306	0.200772	9.94375	10.0752	0.131409	0.137874	0.319877	0.118583	-0.201295	0.105813	16.1244	14.6395	-1.48491	0.629483	24	NO CHANGE	NO CHANGE	NO CHANGE
TC1700001947.mm.2	Csnk2b	0.000877846	0.222294	12.0079	12.1317	0.12381	0.0554342	0.251462	0.0763959	-0.175067	0.0561378	11.1577	12.5255	1.36772	0.680336	24	NO CHANGE	NO CHANGE	NO CHANGE
TC1900000723.mm.2	Slk	0.000878305	0.415636	12.2513	12.2365	-0.0147024	0.863095	0.279543	0.0785077	-0.201036	0.0972739	4.50247	4.45868	-0.0437849	0.99213	24	NO CHANGE	NO CHANGE	NO CHANGE
TC1200000800.mm.2	Acot3	0.000878818	0.024211	8.135	6.71619	-1.41881	0.001735	1.58336	1.08525	-0.49811	0.413888	14.216	11.5456	-2.67043	0.144283	24	NO CHANGE	NO CHANGE	DOWN
TC0800001465.mm.2	Map1lc3b	0.000883076	0.0961042	11.6929	11.3563	-0.336607	0.0022675	0.318598	0.218133	-0.100465	0.500414	7.8251	10.6604	2.83534	0.198642	24	NO CHANGE	NO CHANGE	DOWN
TC1300001683.mm.2	Hdgfl1	0.000886839	0.0788545	3.54	3.46532	-0.0746826	0.418107	0.248399	0.214134	-0.0342649	0.793699	20.5206	8.49369	11.9731	1.54255e-06	24	NO CHANGE	NO CHANGE	NO CHANGE
TC1500001996.mm.2	5031439G07Rik; Mir1249	0.000889847	0.00228358	8.71667	9.21423	0.49756	5.60775e-05	0.357958	0.454995	0.0970366	0.542972	9.54456	9.11356	-0.430996	0.773392	24	NO CHANGE	NO CHANGE	UP
TC0400001788.mm.2	Fam131c	0.000890745	0.313691	3.96917	3.68889	-0.280278	0.00748944	0.400553	0.0991507	-0.301402	0.0393664	19.0239	0.107026	5.08314	0.205928	24	DOWN	NO CHANGE	DOWN
TC1700002158.mm.2	1600014C23Rik	0.000890813	0.410854	4.1375	4.09806	-0.0394444	0.677662	0.370859	0.0764626	-0.294396	0.0316936	4.32655	17.8317	-10.4948	0.0388511	24	DOWN	NO CHANGE	NO CHANGE
TC0300002959.mm.2	Sgms2	0.000892242	0.0572923	10.9992	9.35437	-1.6448	2.8059e-12	0.511799	0.398708	-0.113091	0.634799	4.4144	5.89298	1.47858	0.477881	24	NO CHANGE	NO CHANGE	DOWN
TC1100000336.mm.2	Hba-a2; Hba-a1	0.000893881	0.378766	16.2342	17.4805	1.24637	1.22584e-06	0.994068	0.15156	-0.842508	0.00971115	18.2414	19.1883	0.946877	0.867539	24	DOWN	NO CHANGE	UP
TC0200002452.mm.2	Top1	0.000896206	0.00223153	13.2975	13.2277	-0.0697619	0.539796	0.470467	0.349303	-0.121164	0.446692	17.1011	15.9779	-1.12322	0.476904	24	NO CHANGE	NO CHANGE	NO CHANGE
TC0900001373.mm.2	Rassf1	0.000897119	0.277741	6.56667	6.62935	0.0626786	0.56789	0.378666	0.132323	-0.246343	0.115747	6.1602	13.6961	7.53591	0.0314548	24	NO CHANGE	NO CHANGE	NO CHANGE
TC1200002049.mm.2	Zfyve1	0.000898406	0.076136	10.1792	9.46115	-0.718016	8.51115e-09	0.351267	0.204255	-0.147012	0.3049	19.6779	0.360823	4.6829	0.0357111	24	NO CHANGE	NO CHANGE	DOWN
TC1500001511.mm.2	Ext1	0.000899026	0.292046	11.5687	11.43	-0.13879	0.105259	0.319571	0.0905935	-0.228978	0.0585444	10.3888	14.2102	3.82136	0.314688	24	NO CHANGE	NO CHANGE	NO CHANGE
TC0500001128.mm.2	Zfp932	0.000900159	0.00204663	9.92958	9.90917	-0.0204166	0.813141	0.257698	0.36605	0.108352	0.378631	19.7032	19.5073	-0.195902	0.89981	24	NO CHANGE	NO CHANGE	NO CHANGE
TC0500000044.mm.2	Sri	0.00090419	0.0571641	9.30917	9.23266	-0.0765079	0.470992	0.33811	0.23988	-0.0982301	0.507898	11.0147	4.62135	-6.39337	0.00391229	24	NO CHANGE	NO CHANGE	NO CHANGE
TC0500000072.mm.2	Speer1	0.00090878	0.409786	4.49583	4.09091	-0.404921	0.0134183	0.45575	0.162707	-0.293043	0.196989	1.39259	23.4583	-1.93426	0.621021	24	NO CHANGE	NO CHANGE	DOWN
TC0500000077.mm.2	Gm8926	0.000908783	0.409798	4.49583	4.09091	-0.404921	0.0134183	0.45575	0.162707	-0.293044	0.196989	1.39259	23.4583	-1.93433	0.621009	24	NO CHANGE	NO CHANGE	DOWN
TC1500000667.mm.2	Polr2f	0.000909433	0.28517	8.88417	8.74016	-0.144008	0.146075	0.330329	0.121114	-0.209215	0.139017	13.261	20.6521	7.39106	0.0279287	24	NO CHANGE	NO CHANGE	NO CHANGE
TC1100002966.mm.2	Hs3st3b1	0.000911767	0.312393	9.48083	9.97175	0.490913	3.00983e-05	0.349842	0.12466	-0.225181	0.139564	1.55775	23.0296	-2.52811	0.457973	24	NO CHANGE	NO CHANGE	UP
TC0700002970.mm.2	Nr1h2	0.000921204	0.200846	8.22042	8.89442	0.674008	5.85314e-08	0.385219	0.135193	-0.250026	0.0877155	5.87117	5.39351	-0.477659	0.879331	24	NO CHANGE	NO CHANGE	UP
TC1100003107.mm.2	Pfn1	0.000922181	0.291836	14.8258	15.1692	0.343353	0.000283064	0.260614	0.110219	-0.150395	0.222603	4.95024	5.74853	0.798294	0.81113	24	NO CHANGE	NO CHANGE	UP
TC0700002944.mm.2	Zfp715	0.000925331	0.216255	7.25333	6.83788	-0.415456	4.70053e-06	0.25424	0.117086	-0.137154	0.227947	10.9085	7.83813	-3.07036	0.284327	24	NO CHANGE	NO CHANGE	DOWN
TC1000003169.mm.2	Mettl7b	0.00092666	0.0259749	14.375	14.1559	-0.219127	0.0041646	0.265206	0.177846	-0.0873591	0.391904	15.2816	15.463	0.181366	0.924564	24	NO CHANGE	NO CHANGE	DOWN
TC0900002328.mm.2	Chrnb4	0.000930589	0.00578062	4.69083	4.49083	-0.2	0.0814833	0.330732	0.412948	0.0822151	0.604823	4.84911	1.75283	-3.09628	0.069072	24	NO CHANGE	NO CHANGE	NO CHANGE
TC1100001705.mm.2	Acbd4	0.000932257	0.0189176	7.36125	6.91978	-0.441468	0.000682165	0.428613	0.325624	-0.102988	0.545411	20.8575	18.0295	-2.82807	0.121341	24	NO CHANGE	NO CHANGE	DOWN
TC0Y00000006.mm.2	Eif2s3y	0.000935513	0.558933	11.3287	11.0313	-0.2975	0.000394102	0.26237	0.0501871	-0.212183	0.0566441	11.2738	5.67002	-5.60376	0.365267	24	NO CHANGE	NO CHANGE	DOWN
TC0500003585.mm.2	Smurf1	0.000936367	0.00106373	7.91292	7.43645	-0.476468	6.38357e-05	0.48517	0.312973	-0.172197	0.265099	6.62206	8.27751	1.65545	0.290401	24	NO CHANGE	NO CHANGE	DOWN
TC0500000888.mm.2	40787	0.000937982	0.081486	8.44042	8.48173	0.0413095	0.821424	0.625584	0.374322	-0.251261	0.338396	2.21603	20.6069	-5.60912	0.0124929	24	NO CHANGE	NO CHANGE	NO CHANGE
TC1100000939.mm.2	Asgr1	0.000939028	0.631179	15.5596	14.8443	-0.715317	1.50634e-13	0.195342	0.0384536	-0.156888	0.0997415	13.7741	17.8737	4.09961	0.553738	24	NO CHANGE	NO CHANGE	DOWN
TC1000002794.mm.2	Tmtc2	0.000939849	0.000239741	5.94375	5.14798	-0.795774	1.74074e-07	0.547801	0.486549	-0.061252	0.737249	10.6625	10.0113	-0.651172	0.623217	24	NO CHANGE	NO CHANGE	DOWN
TC0900000398.mm.2	Olfr147	0.000940933	0.0298158	4.54125	4.29671	-0.244544	0.0535879	0.441383	0.314259	-0.127124	0.474281	2.58309	22.0351	-4.548	0.0162536	24	NO CHANGE	ADVANCE	NO CHANGE
TC0200003162.mm.2	Rabl6	0.000941524	0.0162056	6.18	6.0628	-0.117202	0.345974	0.484494	0.310633	-0.173861	0.321134	12.7907	13.7043	0.913574	0.617399	24	NO CHANGE	NO CHANGE	NO CHANGE
TC1900001025.mm.2	Plcb3	0.00094261	0.116579	6.71375	6.83385	0.120099	0.18394	0.34016	0.142902	-0.197259	0.11992	4.14508	15.9608	11.8157	6.18122e-05	24	NO CHANGE	NO CHANGE	NO CHANGE
TC1100001183.mm.2	Rab11fip4	0.000943166	0.127703	5.00333	4.08335	-0.91998	4.45955e-11	0.318049	0.193328	-0.12472	0.398294	0.335708	18.2432	-6.09246	0.0161459	24	NO CHANGE	NO CHANGE	DOWN
TC1700002764.mm.2	Sft2d1	0.000945344	0.0741572	10.3271	10.1235	-0.203571	0.0402984	0.331632	0.203429	-0.128203	0.356184	9.57519	10.7779	1.20267	0.569165	24	NO CHANGE	NO CHANGE	DOWN
TC1100003898.mm.2	Cdc27	0.000946079	0.348229	10.2867	10.8503	0.563611	4.62477e-11	0.246147	0.0597145	-0.186432	0.043115	8.59075	14.4473	5.85653	0.180235	24	DOWN	NO CHANGE	UP
TC1800000200.mm.2	Mocos	0.000947395	0.0167673	8.91625	8.89774	-0.0185119	0.860587	0.344033	0.311435	-0.0325974	0.82706	0.811038	0.862936	0.0518978	0.976259	24	NO CHANGE	NO CHANGE	NO CHANGE
TC1900000921.mm.2	Rhod	0.000950636	0.0198647	9.29458	9.07687	-0.217718	0.100021	0.494181	0.321751	-0.172429	0.346102	1.16786	4.50127	3.33341	0.0820585	24	NO CHANGE	NO CHANGE	NO CHANGE
TC0100002601.mm.2	Abcb6	0.000952726	0.0291875	8.14833	6.70409	-1.44425	2.60992e-15	0.418039	0.290559	-0.12748	0.442851	14.9869	15.7897	0.802745	0.678206	24	NO CHANGE	NO CHANGE	DOWN
TC1900000071.mm.2	Efemp2	0.000954641	0.873013	6.47625	6.82796	0.351706	0.00654178	0.362374	0.0243277	-0.338046	0.0605615	0.729102	20.7303	-3.9988	0.835926	24	NO CHANGE	NO CHANGE	UP
TC0100003095.mm.2	Atp2b4	0.000958066	0.870032	7.53417	7.14468	-0.389484	0.0504113	0.607437	0.038138	-0.569299	0.0457174	23.8454	21.4195	-2.42585	0.899993	24	DOWN	NO CHANGE	NO CHANGE
TC0900003041.mm.2	Gnat1	0.00095889	0.154431	6.10542	5.60911	-0.49631	0.00397255	0.659594	0.221189	-0.438405	0.0618627	8.47172	5.80229	-2.66943	0.382607	24	NO CHANGE	NO CHANGE	DOWN
TC0600001293.mm.2	Fam21	0.000962054	0.360672	10.24	10.3704	0.130417	0.0793968	0.262563	0.073063	-0.1895	0.0745065	9.916	8.96882	-0.947184	0.809336	24	NO CHANGE	NO CHANGE	NO CHANGE
TC0600002385.mm.2	Gprin3	0.000962072	0.0211657	8.18875	7.25254	-0.93621	1.95028e-05	0.574299	0.578002	0.00370253	0.989252	8.31907	6.33382	-1.98525	0.283124	24	NO CHANGE	NO CHANGE	DOWN
TC0800000271.mm.2	Thsd1	0.000962095	0.00176142	4.28625	4.00129	-0.28496	0.00839726	0.348769	0.404269	0.0555009	0.701819	9.08224	15.2359	6.15361	0.000188216	24	NO CHANGE	DELAY	DOWN
TC1400001898.mm.2	Ero1l	0.000962215	0.0145226	9.08583	9.41865	0.332817	0.00669654	0.474168	0.29514	-0.179028	0.288765	15.4409	10.6381	-4.80276	0.00921006	24	NO CHANGE	ADVANCE	UP
TC0700003569.mm.2	Mesp1	0.000963522	0.726572	4.42458	4.47784	0.053254	0.559792	0.342811	0.0323791	-0.310432	0.0195813	14.8596	1.41801	10.5584	0.338726	24	DOWN	NO CHANGE	NO CHANGE
TC0700000341.mm.2	Vmn1r152; Vmn1r104	0.000969995	0.0371033	4.3225	4.38718	0.0646825	0.759268	0.695757	0.525511	-0.170246	0.567956	3.07601	1.45132	-1.62469	0.402972	24	NO CHANGE	NO CHANGE	NO CHANGE
TC0300000500.mm.2	Mme	0.000970181	0.0393749	10.4646	11.4209	0.956349	2.59825e-06	0.703653	0.362144	-0.341508	0.174247	17.3584	18.2532	0.894776	0.673655	24	NO CHANGE	NO CHANGE	UP
TC0900003122.mm.2	Rtp3	0.00097202	0.00195455	10.9467	11.1195	0.172857	0.356015	0.703644	0.678693	-0.0249506	0.925368	20.4238	21.3552	0.931367	0.519051	24	NO CHANGE	NO CHANGE	NO CHANGE
TC1500001136.mm.2	Ghr	0.000972456	0.233502	17.3704	16.2396	-1.13077	1.02494e-19	0.237681	0.0916021	-0.146079	0.138371	14.6174	13.3695	-1.24792	0.689291	24	NO CHANGE	NO CHANGE	DOWN
TC0900003051.mm.2	Apeh	0.000973413	0.00741514	11.72	11.1172	-0.602817	5.90078e-11	0.266874	0.201419	-0.0654547	0.504504	13.0076	12.9357	-0.0718744	0.965189	24	NO CHANGE	NO CHANGE	DOWN
TC0600000698.mm.2	Lancl2	0.000973905	0.594913	6.67625	6.89381	0.217559	0.0705976	0.499005	0.0540694	-0.444936	0.0102	7.09205	6.4528	-0.639252	0.940242	24	DOWN	NO CHANGE	NO CHANGE
TC0100000071.mm.2	Xkr9	0.000977723	0.00582433	9.84917	9.97312	0.123948	0.270265	0.363895	0.392996	0.0291016	0.854528	8.35918	7.96162	-0.397559	0.802222	24	NO CHANGE	NO CHANGE	NO CHANGE
TC0900000181.mm.2	A230050P20Rik	0.000979168	0.0524437	10.6708	10.0062	-0.664663	1.51769e-05	0.564808	0.254198	-0.31061	0.11656	23.8478	22.5112	-1.33658	0.548291	24	NO CHANGE	NO CHANGE	DOWN
TC1100002018.mm.2	1810043H04Rik	0.000979664	0.34481	7.3	7.16871	-0.13129	0.304639	0.441874	0.130924	-0.31095	0.0871229	19.8847	17.8295	-2.05521	0.603528	24	NO CHANGE	NO CHANGE	NO CHANGE
TC1200000994.mm.2	Calm1	0.000982171	0.312565	13.3171	13.378	0.0609325	0.236612	0.144527	0.0635062	-0.0810212	0.263059	19.4252	1.81596	6.39076	0.0661703	24	NO CHANGE	NO CHANGE	NO CHANGE
TC1000003228.mm.2	Bloc1s1	0.000985089	0.153118	13.3504	13.0421	-0.308333	4.45804e-05	0.210581	0.115599	-0.094982	0.32232	16.8846	14.2147	-2.66987	0.308158	24	NO CHANGE	NO CHANGE	DOWN
TC0600002027.mm.2	Chchd3	0.000986748	0.502874	13.0458	13.465	0.419167	1.30132e-07	0.182369	0.0565134	-0.125855	0.188308	14.8846	9.11406	-5.77054	0.218218	24	NO CHANGE	NO CHANGE	UP
TC0600000775.mm.2	Gng12	0.000987123	0.000526834	11.29	11.3313	0.0412897	0.502375	0.266658	0.201065	-0.0655929	0.447507	12.197	14.6349	2.43785	0.105423	24	NO CHANGE	NO CHANGE	NO CHANGE
TC1500000736.mm.2	Xrcc6	0.000988978	0.280433	7.30042	6.90155	-0.398869	0.00060727	0.328865	0.139224	-0.189641	0.216636	16.9386	18.1924	1.25382	0.701682	24	NO CHANGE	NO CHANGE	DOWN
TC0100001969.mm.2	Ncoa2	0.000994138	0.450506	8.66792	8.57921	-0.0887103	0.310591	0.280873	0.0761699	-0.204703	0.102157	3.88099	7.32589	3.4449	0.45013	24	NO CHANGE	NO CHANGE	NO CHANGE
TC0300000221.mm.2	Pik3ca	0.000994807	0.26148	11.1567	11.2969	0.140218	0.0637343	0.223953	0.10277	-0.121182	0.256085	9.24423	9.43464	0.190408	0.949304	24	NO CHANGE	NO CHANGE	NO CHANGE
TC0800002680.mm.2	Aktip	0.000995297	0.619827	6.3375	6.05633	-0.281171	0.0268674	0.350173	0.074149	-0.276024	0.116307	17.5661	5.84417	-11.722	0.083017	24	NO CHANGE	NO CHANGE	DOWN
TC0500001301.mm.2	Nos1	0.00099533	0.131388	3.85708	4.07359	0.216508	0.0486304	0.324648	0.2026	-0.122048	0.427839	14.0764	21.9864	7.90997	0.00159858	24	NO CHANGE	NO CHANGE	UP
TC0500003576.mm.2	Baiap2l1	0.00100015	0.00014254	9.8425	8.33244	-1.51006	3.92742e-15	0.371175	0.693751	0.322576	0.0736668	12.434	13.4893	1.0553	0.469972	24	NO CHANGE	NO CHANGE	DOWN
TC1600000906.mm.2	Chodl	0.00100341	0.0135649	3.30583	3.60583	0.3	0.000504373	0.26237	0.237137	-0.0252333	0.821318	6.17868	3.77167	-2.40701	0.176011	24	NO CHANGE	NO CHANGE	UP
TC0Y00000204.mm.2	Gm21760	0.00100385	0.0375902	6.05625	5.49347	-0.562778	0.0414735	0.992663	0.599976	-0.392687	0.300199	2.13055	3.03571	0.905161	0.657854	24	NO CHANGE	NO CHANGE	DOWN
TC0100001647.mm.2	Olfr417	0.00100403	0.111628	3.76042	3.67776	-0.0826587	0.469838	0.39224	0.208913	-0.183326	0.26263	1.5916	23.7055	-1.8861	0.424042	24	NO CHANGE	NO CHANGE	NO CHANGE
TC1300001761.mm.2	D930007J09Rik	0.00100548	0.368232	3.97167	4.04298	0.0713095	0.322655	0.26319	0.069194	-0.193996	0.0638542	23.2144	22.5598	-0.654621	0.87151	24	NO CHANGE	NO CHANGE	NO CHANGE
TC1100002836.mm.2	Rnf187	0.00100623	0.000487744	10.22	10.1417	-0.078254	0.229919	0.26344	0.240364	-0.0230761	0.799726	17.6122	18.1858	0.573596	0.682004	24	NO CHANGE	NO CHANGE	NO CHANGE
TC0100003304.mm.2	Xpr1	0.00101147	0.00263181	8.65167	8.37202	-0.279643	0.00153777	0.278517	0.319831	0.0413141	0.727137	10.1386	8.7723	-1.3663	0.362529	24	NO CHANGE	NO CHANGE	DOWN
TC1300001270.mm.2	Plpp1	0.00101198	0.0038382	8.94833	9.65115	0.702817	5.48651e-06	0.591866	0.347001	-0.244864	0.203032	21.1691	1.96217	4.79309	0.00877447	24	NO CHANGE	DELAY	UP
TC0700000805.mm.2	Aspdh	0.00101224	0.00174702	11.5738	12.0553	0.481587	8.06659e-07	0.249668	0.361916	0.112249	0.348281	1.90062	23.2484	-2.6522	0.0895274	24	NO CHANGE	NO CHANGE	UP
TC0200004902.mm.2	Defb26	0.00101473	0.0726404	3.54042	3.5052	-0.0352183	0.765496	0.421265	0.231635	-0.18963	0.255737	17.0208	17.5164	0.495602	0.826626	24	NO CHANGE	NO CHANGE	NO CHANGE
TC0600001319.mm.2	Zfp637	0.00101593	0.0994829	7.87833	7.92468	0.0463492	0.673	0.380386	0.208824	-0.171563	0.277686	20.3394	21.6033	1.26391	0.577268	24	NO CHANGE	NO CHANGE	NO CHANGE
TC0400003695.mm.2	Tmem222	0.00102279	0.0878239	7.38667	7.03907	-0.347599	0.00167912	0.342978	0.208715	-0.134263	0.363972	12.6199	12.8986	0.278737	0.900871	24	NO CHANGE	NO CHANGE	DOWN
TC0200002359.mm.2	Itch	0.00102625	0.000955309	10.0483	10.1807	0.132341	0.0840922	0.299114	0.277657	-0.021457	0.841882	13.0121	9.42196	-3.59017	0.0133107	24	NO CHANGE	ADVANCE	NO CHANGE
TC0900001411.mm.2	Qrich1	0.00102628	0.061794	9.48667	9.55692	0.0702579	0.455537	0.335759	0.192343	-0.143416	0.280128	7.27998	5.87645	-1.40353	0.520882	24	NO CHANGE	NO CHANGE	NO CHANGE
TC0900000408.mm.2	Olfr910	0.00102865	0.550351	4.07958	3.68157	-0.398016	0.010767	0.638951	0.0759427	-0.563008	0.0108261	1.20033	19.1712	-6.02914	0.433021	24	DOWN	NO CHANGE	DOWN
TC1500002048.mm.2	Sbf1	0.00103198	0.0813642	7.22458	7.45861	0.234028	0.0171868	0.349065	0.180924	-0.168141	0.218363	4.58591	11.2085	6.6226	0.00483278	24	NO CHANGE	NO CHANGE	UP
TC0200002453.mm.2	Plcg1	0.00103204	0.0132431	9.0075	8.32938	-0.678115	2.06993e-07	0.406071	0.301154	-0.104918	0.498836	9.15821	6.6761	-2.48211	0.159015	24	NO CHANGE	NO CHANGE	DOWN
TC0200005328.mm.2	Gm14393	0.00103792	0.000233419	11.1083	10.805	-0.303373	0.00882216	0.485164	0.382133	-0.10303	0.507992	14.9707	16.6436	1.67299	0.247558	24	NO CHANGE	NO CHANGE	DOWN
TC1700000277.mm.2	Gm10509	0.00103878	0.0417318	7.26083	7.38444	0.123611	0.42604	0.480656	0.384861	-0.0957944	0.659977	16.0265	17.9976	1.97112	0.323769	24	NO CHANGE	NO CHANGE	NO CHANGE
TC1900000703.mm.2	Trim8	0.00104085	0.0362664	8.07	7.78107	-0.288929	0.00683054	0.349882	0.253443	-0.0964391	0.509353	7.08609	10.9675	3.88138	0.0441287	24	NO CHANGE	DELAY	DOWN
TC0700002535.mm.2	Vmn1r121	0.00104315	0.24119	4.06208	3.8106	-0.251488	0.239018	0.73451	0.279883	-0.454627	0.137764	2.25164	23.3057	-2.94595	0.34011	24	NO CHANGE	NO CHANGE	NO CHANGE
TC0X00000652.mm.2	Hmgb3	0.00104527	0.024436	6.53375	6.31746	-0.21629	0.0609748	0.382544	0.307015	-0.0755282	0.64022	9.17942	9.09363	-0.085792	0.961637	24	NO CHANGE	NO CHANGE	NO CHANGE
TC1400002098.mm.2	Tgm1	0.00104568	0.0192569	8.15833	7.04617	-1.11216	8.587e-08	0.646918	0.428342	-0.218575	0.366539	12.9293	15.8388	2.90951	0.127248	24	NO CHANGE	NO CHANGE	DOWN
TC1400000747.mm.2	Lrp10	0.00104639	0.0109703	7.72792	8.13577	0.407857	0.00026073	0.405669	0.271454	-0.134215	0.358677	7.48449	7.3171	-0.167389	0.92342	24	NO CHANGE	NO CHANGE	UP
TC0500002065.mm.2	Tomm7	0.00104805	0.174222	8.935	8.79048	-0.144524	0.190879	0.30266	0.186665	-0.115995	0.453153	15.5149	18.4313	2.91638	0.27555	24	NO CHANGE	NO CHANGE	NO CHANGE
TC0300000802.mm.2	S100a16	0.00104941	0.0037182	7.31	7.05262	-0.257381	0.0155028	0.374562	0.348045	-0.0265167	0.85541	16.0212	19.5752	3.55391	0.0245407	24	NO CHANGE	DELAY	DOWN
TC1600000940.mm.2	Gabpa	0.00104997	0.00522755	11.6979	11.2568	-0.441151	1.23228e-05	0.329976	0.285677	-0.0442984	0.726649	5.73245	7.45081	1.71836	0.279311	24	NO CHANGE	NO CHANGE	DOWN
TC0200005516.mm.2	Tmem189	0.00105139	8.5624e-05	6.31583	5.64042	-0.675417	1.85745e-06	0.485792	0.548498	0.0627064	0.714475	16.4235	16.9829	0.559365	0.666046	24	NO CHANGE	NO CHANGE	DOWN
TC0200003579.mm.2	Acvr1	0.00105171	0.129358	6.18917	6.0905	-0.0986706	0.355629	0.363826	0.181836	-0.18199	0.229207	11.9125	6.71378	-5.19872	0.0442079	24	NO CHANGE	NO CHANGE	NO CHANGE
TC0300000306.mm.2	Slc25a31	0.00105255	0.18224	3.53958	3.88972	0.350139	0.0135716	0.475531	0.201752	-0.273779	0.160943	2.40073	13.1644	10.7637	0.000445868	24	NO CHANGE	NO CHANGE	UP
TC1500001320.mm.2	Ankrd33b	0.00105632	0.131327	9.68375	9.58591	-0.0978373	0.368641	0.396776	0.173256	-0.22352	0.148303	15.7953	13.5405	-2.25482	0.395082	24	NO CHANGE	NO CHANGE	NO CHANGE
TC0200004651.mm.2	Rnf24	0.00105683	0.0842675	7.01708	9.20363	2.18655	2.29623e-17	0.473861	0.331498	-0.142363	0.519545	9.41599	7.3793	-2.03668	0.35477	24	NO CHANGE	NO CHANGE	UP
TC0500001612.mm.2	Fis1	0.00105954	0.147178	7.8275	7.76173	-0.0657738	0.381843	0.272367	0.118231	-0.154136	0.153999	14.4056	11.4072	-2.99836	0.256086	24	NO CHANGE	NO CHANGE	NO CHANGE
TC1000001020.mm.2	Tcp11l2	0.00105966	2.20563e-05	6.0875	6.2347	0.147202	0.529031	0.95213	1.13136	0.179235	0.584951	4.82035	5.75548	0.935135	0.447916	24	NO CHANGE	NO CHANGE	NO CHANGE
TC0900001925.mm.2	Tbx20	0.00106145	0.0638319	6.65625	6.54006	-0.11619	0.459856	0.495842	0.35207	-0.143772	0.5179	9.97776	12.8484	2.87068	0.174523	24	NO CHANGE	NO CHANGE	NO CHANGE
TC0400000442.mm.2	Rgp1	0.00106259	0.000635546	7.80417	8.09139	0.287222	0.0066294	0.427099	0.342459	-0.0846397	0.553922	9.15404	13.2164	4.06235	0.00740196	24	NO CHANGE	DELAY	UP
TC1100002107.mm.2	Sec14l2	0.00106554	0.0284935	13.8771	13.4314	-0.445655	9.45946e-05	0.395528	0.241667	-0.153861	0.299244	20.2376	0.194833	3.95727	0.0440297	24	NO CHANGE	DELAY	DOWN
TC1000003158.mm.2	Suox	0.00106936	0.00914115	11.5558	11.058	-0.497857	1.38804e-05	0.277325	0.366751	0.0894258	0.538868	21.5517	22.5127	0.960987	0.579979	24	NO CHANGE	NO CHANGE	DOWN
TC0300002674.mm.2	Rap1a	0.00106973	0.216899	12.1779	11.997	-0.180873	0.0120758	0.215484	0.0999839	-0.1155	0.23789	17.7439	14.916	-2.82798	0.346272	24	NO CHANGE	NO CHANGE	DOWN
TC0800002313.mm.2	Msmo1	0.00107115	0.539771	9.20125	11.4297	2.22849	2.59319e-18	0.551458	0.0957821	-0.455676	0.0370793	10.105	22.7238	-11.3812	0.0618079	24	DOWN	NO CHANGE	UP
TC0100001859.mm.2	Slc30a1	0.00107311	0.00861458	8.08083	7.765	-0.315833	0.000575733	0.328413	0.233879	-0.0945332	0.428683	14.21	16.0817	1.87172	0.285273	24	NO CHANGE	NO CHANGE	DOWN
TC0400002572.mm.2	Tomm5	0.00107952	0.483383	9.06208	9.33702	0.27494	0.0150668	0.387511	0.0800967	-0.307414	0.0491655	16.5191	4.88795	-11.6311	0.0383733	24	DOWN	NO CHANGE	UP
TC1300000176.mm.2	Hist1h4j; Hist1h4m	0.00108037	0.0161429	12.4471	12.6848	0.237738	0.00922612	0.337075	0.219824	-0.117251	0.343427	20.9056	18.0197	-2.88587	0.121989	24	NO CHANGE	NO CHANGE	UP
TC0400000140.mm.2	Nbn	0.00108209	0.0189912	8.46333	8.27109	-0.192242	0.072175	0.307105	0.325081	0.0179765	0.904562	9.00127	10.1272	1.12595	0.526231	24	NO CHANGE	NO CHANGE	NO CHANGE
TC0200003680.mm.2	Scn9a	0.00108694	0.431953	3.58875	3.28315	-0.305595	0.00633441	0.397635	0.0864748	-0.31116	0.0451189	2.20114	7.41667	5.21553	0.286343	24	DOWN	NO CHANGE	DOWN
TC0700004265.mm.2	Xpo6	0.00109476	1.08773e-06	11.7842	11.6811	-0.103036	0.177202	0.332498	0.397551	0.0650532	0.54406	6.19076	7.32507	1.1343	0.316984	24	NO CHANGE	NO CHANGE	NO CHANGE
TC0300001906.mm.2	1700034I23Rik	0.00109576	0.0860863	4.98	5.0206	0.0405952	0.757507	0.37214	0.281148	-0.0909919	0.621784	4.61422	5.33552	0.721301	0.750789	24	NO CHANGE	NO CHANGE	NO CHANGE
TC0700003044.mm.2	Tsg101	0.00109646	0.00220731	12.4275	12.702	0.274544	4.67762e-05	0.255641	0.182997	-0.0726431	0.404712	6.46483	10.0151	3.55024	0.0253831	24	NO CHANGE	DELAY	UP
TC0700002975.mm.2	Tbc1d17	0.00109778	0.0473624	7.065	6.73665	-0.328353	0.0301918	0.536597	0.323999	-0.212598	0.314344	4.83109	8.76175	3.93066	0.0558573	24	NO CHANGE	NO CHANGE	DOWN
TC0900002776.mm.2	Ube2cbp	0.001098	0.352308	5.55875	5.0174	-0.541349	5.25992e-05	0.456967	0.110418	-0.346548	0.0450064	17.5465	16.0076	-1.53894	0.728493	24	DOWN	NO CHANGE	DOWN
TC0700003822.mm.2	Mrpl48	0.00109811	0.147692	10.7708	10.6694	-0.101468	0.0635083	0.207527	0.0777726	-0.129754	0.0935198	12.2379	12.2555	0.0176084	0.995	24	NO CHANGE	NO CHANGE	NO CHANGE
TC0300002501.mm.2	Hist2h2aa1	0.00110084	0.0200459	13.8417	13.9936	0.151905	0.134217	0.326383	0.28786	-0.0385222	0.787365	20.5826	20.7319	0.14933	0.932158	24	NO CHANGE	NO CHANGE	NO CHANGE
TC0300003215.mm.2	Hist2h2aa2	0.00110085	0.0200459	13.8417	13.9936	0.151905	0.134217	0.326382	0.28786	-0.0385215	0.787369	20.5826	20.7319	0.149351	0.932149	24	NO CHANGE	NO CHANGE	NO CHANGE
TC1400001531.mm.2	Ecd	0.00110119	0.0194509	9.78875	9.7028	-0.0859524	0.148066	0.207771	0.156964	-0.0508072	0.541469	16.952	19.1172	2.16522	0.231363	24	NO CHANGE	NO CHANGE	NO CHANGE
TC0800003175.mm.2	Fam89a	0.001103	0.00771141	5.76208	6.22895	0.466865	0.000316545	0.389238	0.387189	-0.00204885	0.99021	21.8087	4.43686	6.62816	0.000285115	24	NO CHANGE	DELAY	UP
TC0400004151.mm.2	Atad3a	0.00110711	0.0359668	10.185	9.8149	-0.370099	0.000391225	0.31667	0.239788	-0.0768817	0.572258	14.0174	18.4351	4.41765	0.0272137	24	NO CHANGE	DELAY	DOWN
TC0200004163.mm.2	Ext2	0.00110718	0.000237404	5.34417	5.46849	0.124325	0.052437	0.211613	0.306443	0.0948308	0.288609	3.15066	19.3444	-7.80629	9.8376e-07	24	NO CHANGE	ADVANCE	NO CHANGE
TC0200004433.mm.2	Ino80	0.00111133	0.0752653	8.16167	8.37679	0.215119	0.0400597	0.329916	0.219812	-0.110103	0.45185	9.46348	9.11422	-0.349259	0.868553	24	NO CHANGE	NO CHANGE	UP
TC0300003181.mm.2	Tnni3k	0.00111169	0.232322	3.67458	3.34448	-0.330099	0.00998253	0.46238	0.153244	-0.309136	0.0843684	23.1002	22.1439	-0.956263	0.764498	24	NO CHANGE	NO CHANGE	DOWN
TC0800002175.mm.2	Trappc11	0.00111272	0.170756	9.92458	10.0407	0.116091	0.181797	0.20163	0.15998	-0.0416507	0.734787	6.81275	21.0955	-9.7172	0.000518137	24	NO CHANGE	NO CHANGE	NO CHANGE
TC1800001717.mm.2	Gm17266	0.00111679	0.425093	3.78333	3.75643	-0.0269048	0.839056	0.377171	0.132529	-0.244643	0.201084	22.6018	10.2915	11.6897	0.00536272	24	NO CHANGE	NO CHANGE	NO CHANGE
TC1400000413.mm.2	Mbl1	0.00111762	0.00582154	13.5346	12.8379	-0.696726	2.94987e-07	0.405384	0.379423	-0.0259609	0.874066	23.7013	22.82	-0.881316	0.573715	24	NO CHANGE	NO CHANGE	DOWN
TC1900000011.mm.2	Mtl5	0.00112148	0.313396	4.52833	4.17464	-0.35369	0.00199394	0.311195	0.131087	-0.180108	0.237612	3.25369	5.5967	2.34301	0.501856	24	NO CHANGE	NO CHANGE	DOWN
TC0100000765.mm.2	Sp140	0.00112307	0.0600982	5.45625	6.12573	0.669484	6.99673e-06	0.480106	0.260892	-0.219215	0.23674	5.91961	5.63213	-0.287481	0.896981	24	NO CHANGE	NO CHANGE	UP
TC0600001097.mm.2	Nr2c2	0.00112455	0.0140963	7.16167	7.37143	0.209762	0.119927	0.478372	0.376244	-0.102128	0.590929	5.76936	8.77766	3.0083	0.0826288	24	NO CHANGE	NO CHANGE	NO CHANGE
TC0100002285.mm.2	Slc40a1	0.00112859	0.000585184	13.025	13.9964	0.971409	4.24581e-10	0.488161	0.443625	-0.0445358	0.795048	8.5661	11.1807	2.61461	0.0643323	24	NO CHANGE	NO CHANGE	UP
TC0700002078.mm.2	Lsp1	0.001129	0.356413	5.775	6.60302	0.828016	3.93148e-07	0.441371	0.150973	-0.290398	0.146977	7.19351	9.74416	2.55066	0.48624	24	NO CHANGE	NO CHANGE	UP
TC0600001035.mm.2	Mgll	0.001131	0.162459	9.775	11.3618	1.58677	1.04996e-14	0.455463	0.212413	-0.24305	0.206521	13.9455	14.5369	0.591419	0.829916	24	NO CHANGE	NO CHANGE	UP
TC0500002712.mm.2	Jchain	0.00113422	0.121381	3.90917	3.77992	-0.129246	0.500231	0.617408	0.345168	-0.272239	0.31522	16.3459	13.6145	-2.73139	0.268931	24	NO CHANGE	NO CHANGE	NO CHANGE
TC0700002820.mm.2	Scgb2b26	0.00113663	0.0706657	3.68	3.35921	-0.320794	0.0201638	0.489737	0.252732	-0.237005	0.208628	1.9043	4.42792	2.52362	0.28139	24	NO CHANGE	NO CHANGE	DOWN
TC1200002148.mm.2	Dio2	0.00113681	0.200268	3.2425	3.20885	-0.0336508	0.689727	0.30947	0.112512	-0.196958	0.10317	15.0278	1.27937	10.2515	0.00173802	24	NO CHANGE	NO CHANGE	NO CHANGE
TC1100002102.mm.2	Slc35e4	0.00113988	0.243253	3.50875	3.52758	0.0188294	0.855221	0.387021	0.123286	-0.263736	0.0768522	22.2995	19.3276	-2.97187	0.380762	24	NO CHANGE	NO CHANGE	NO CHANGE
TC0500000908.mm.2	Gm16513; Gm16367	0.001142	0.094108	3.93792	3.89815	-0.0397619	0.781343	0.465761	0.275977	-0.189783	0.346503	3.50656	2.91183	-0.594731	0.800228	24	NO CHANGE	NO CHANGE	NO CHANGE
TC0400001307.mm.2	Elovl1	0.00114242	1.21983e-05	13.0642	13.4492	0.38506	4.65217e-05	0.377664	0.365465	-0.0121984	0.919763	18.2118	20.1226	1.91079	0.125614	24	NO CHANGE	NO CHANGE	UP
TC1300001500.mm.2	Cdk13	0.00114351	0.839076	7.81083	7.9228	0.111964	0.0956408	0.207697	0.0157472	-0.19195	0.046593	7.71621	23.624	-8.09223	0.613704	24	DOWN	NO CHANGE	NO CHANGE
TC0X00000742.mm.2	Brcc3	0.00114621	0.0845793	10.8867	10.7468	-0.139861	0.0554384	0.214073	0.149197	-0.064876	0.517838	16.809	14.5999	-2.2091	0.331562	24	NO CHANGE	NO CHANGE	NO CHANGE
TC1100000543.mm.2	Cby3	0.00114665	0.348823	6.22208	6.08218	-0.139901	0.173182	0.374601	0.0988186	-0.275782	0.0611716	1.9632	0.383329	-1.57988	0.698313	24	NO CHANGE	NO CHANGE	NO CHANGE
TC1100001460.mm.2	Slc35b1	0.001153	0.00561604	9.54958	9.84173	0.292143	0.0304915	0.424854	0.447183	0.0223291	0.903247	18.1363	17.124	-1.01225	0.538116	24	NO CHANGE	NO CHANGE	UP
TC0100000829.mm.2	Dgkd	0.00115387	0.00248571	5.14542	5.42938	0.283968	0.0263505	0.411375	0.481789	0.0704133	0.691196	9.22405	8.96313	-0.260919	0.86178	24	NO CHANGE	NO CHANGE	UP
TC1400002010.mm.2	Gm17078	0.00115995	0.012772	4.11792	3.965	-0.152917	0.230098	0.37641	0.396602	0.0201925	0.908958	23.7037	4.43434	4.73061	0.0109086	24	NO CHANGE	DELAY	NO CHANGE
TC0100000255.mm.2	Zap70	0.00116065	0.0514862	4.54917	3.98887	-0.560298	1.81432e-05	0.456301	0.227888	-0.228413	0.172667	17.5641	8.31263	-9.25145	0.000104464	24	NO CHANGE	NO CHANGE	DOWN
TC0700001431.mm.2	Arap1	0.00116205	0.393871	8.53792	8.7404	0.20248	0.155652	0.478912	0.129877	-0.349035	0.0819846	1.16448	3.43541	2.27093	0.608131	24	NO CHANGE	NO CHANGE	NO CHANGE
TC0500001689.mm.2	Nudt1	0.00116467	0.0325259	5.67542	5.23365	-0.441766	0.00785002	0.575075	0.37225	-0.202824	0.367896	22.1582	1.53407	3.37589	0.0908496	24	NO CHANGE	NO CHANGE	DOWN
TC1300002510.mm.2	Tnpo1	0.00116549	0.00153968	13.3046	12.8621	-0.44246	3.50962e-06	0.341694	0.267701	-0.0739932	0.532723	6.04841	8.28507	2.23666	0.140267	24	NO CHANGE	NO CHANGE	DOWN
TC0700002015.mm.2	Olfr46	0.0011661	0.16179	3.17375	2.95399	-0.219762	0.0316763	0.357845	0.149809	-0.208035	0.145578	19.6705	19.623	-0.0474407	0.986248	24	NO CHANGE	NO CHANGE	DOWN
TC1500000420.mm.2	Trmt12	0.0011731	0.126883	6.42625	6.35798	-0.0682738	0.546079	0.396124	0.188162	-0.207963	0.195738	16.9499	18.4721	1.52218	0.554162	24	NO CHANGE	NO CHANGE	NO CHANGE
TC1100000780.mm.2	Mfap4	0.00118193	0.391644	6.24792	6.8094	0.561488	1.23643e-05	0.359108	0.114717	-0.24439	0.136593	11.3318	11.6885	0.356682	0.928196	24	NO CHANGE	NO CHANGE	UP
TC1000002353.mm.2	Bicc1	0.00118229	0.189318	6.82	7.20653	0.386528	0.0084491	0.515407	0.195105	-0.320302	0.1147	7.35464	11.9647	4.61001	0.121954	24	NO CHANGE	NO CHANGE	UP
TC0500003466.mm.2	Cyp3a13	0.00118258	0.566647	13.7108	13.4158	-0.29504	0.0106369	0.361052	0.0736086	-0.287443	0.0755379	17.4638	21.6249	4.16111	0.47501	24	NO CHANGE	NO CHANGE	DOWN
TC0100002904.mm.2	Serpinb3d	0.00118283	0.525993	3.51042	3.52619	0.0157738	0.910613	0.341029	0.113812	-0.227216	0.253908	0.585656	6.0277	5.44205	0.286181	24	NO CHANGE	NO CHANGE	NO CHANGE
TC1100001467.mm.2	Phb	0.00118639	0.025839	15.1296	15.1614	0.0318053	0.694686	0.246311	0.22118	-0.0251318	0.824345	15.4685	15.5141	0.0455687	0.980912	24	NO CHANGE	NO CHANGE	NO CHANGE
TC0600001126.mm.2	Fam19a1	0.00118751	0.000758029	8.39583	8.03611	-0.359722	0.0077765	0.455565	0.525999	0.0704341	0.697084	1.22624	3.55928	2.33304	0.112114	24	NO CHANGE	NO CHANGE	DOWN
TC1800000259.mm.2	Ercc3	0.0011942	0.0575085	9.01542	8.93536	-0.0800595	0.320079	0.28877	0.168097	-0.120673	0.293722	14.2101	8.59072	-5.6194	0.00987257	24	NO CHANGE	NO CHANGE	NO CHANGE
TC0600002629.mm.2	Dusp11	0.00119531	0.253702	11.2154	10.9782	-0.237262	0.00553599	0.280893	0.103662	-0.177231	0.132119	8.62606	11.7937	3.16766	0.323771	24	NO CHANGE	NO CHANGE	DOWN
TC1500001978.mm.2	Mcat	0.00119685	0.585252	7.26458	6.87823	-0.386349	4.74046e-05	0.196264	0.060324	-0.13594	0.261539	20.6519	17.9434	-2.70848	0.639728	24	NO CHANGE	NO CHANGE	DOWN
TC0700002635.mm.2	Ceacam1	0.0011973	8.16309e-05	12.8175	13.2729	0.455377	2.58203e-05	0.374135	0.441449	0.0673144	0.619262	4.15318	3.16114	-0.992041	0.447918	24	NO CHANGE	NO CHANGE	UP
TC0400001039.mm.2	Lepr	0.00119792	0.148423	5.96167	6.84506	0.883393	2.61352e-06	0.471914	0.295511	-0.176403	0.449084	10.6931	8.20938	-2.4837	0.318636	24	NO CHANGE	NO CHANGE	UP
TC0X00001760.mm.2	Nudt10	0.00120059	0.217615	3.83667	3.64274	-0.193929	0.0391332	0.287957	0.132257	-0.1557	0.232565	0.813072	13.2569	-11.5562	0.00029567	24	NO CHANGE	NO CHANGE	DOWN
TC1100000339.mm.2	Hba-a1; Hba-a2	0.00120137	0.326931	16.38	17.5729	1.19286	1.49783e-06	0.940112	0.158694	-0.781418	0.0126835	18.2612	18.7847	0.523557	0.921053	24	DOWN	NO CHANGE	UP
TC1900000813.mm.2	Fam160b1	0.00120822	0.00137722	12.0892	11.6915	-0.397679	0.000115939	0.400672	0.283569	-0.117103	0.384184	8.09932	11.3604	3.26107	0.0388305	24	NO CHANGE	DELAY	DOWN
TC0100002503.mm.2	Erbb4	0.00120882	1.05079e-05	5.41292	6.31216	0.899246	4.95802e-06	0.703314	0.885469	0.182155	0.458578	7.41157	7.94394	0.532363	0.654025	24	NO CHANGE	NO CHANGE	UP
TC0700000867.mm.2	Kdelr1	0.00121104	0.133777	12.0333	12.0436	0.0102778	0.866911	0.239428	0.091167	-0.148261	0.0959528	7.35211	8.83292	1.48081	0.587816	24	NO CHANGE	NO CHANGE	NO CHANGE
TC0300000948.mm.2	Hfe2	0.00121556	0.000469145	11.2646	11.917	0.652401	4.66336e-06	0.528777	0.419802	-0.108975	0.537086	21.8436	0.95091	3.10735	0.036975	24	NO CHANGE	DELAY	UP
TC0800001025.mm.2	Heatr3	0.00121682	0.115261	9.82917	10.0354	0.20621	0.031265	0.332917	0.154536	-0.178382	0.17525	13.9917	15.346	1.3543	0.6029	24	NO CHANGE	NO CHANGE	UP
TC1300001555.mm.2	Hist1h2bl	0.00121729	0.0235697	5.61542	5.89226	0.276845	0.00361481	0.293521	0.240953	-0.0525685	0.677428	19.4833	16.8313	-2.65199	0.162883	24	NO CHANGE	NO CHANGE	UP
TC1600000218.mm.2	Aifm3	0.00121755	0.0730941	6.27542	5.36845	-0.906964	3.47546e-09	0.405181	0.248594	-0.156587	0.362118	10.6357	2.67679	-7.95886	0.000908842	24	NO CHANGE	NO CHANGE	DOWN
TC0900000601.mm.2	Timm8b	0.0012217	0.108422	7.85542	7.79093	-0.0644841	0.365319	0.302679	0.0949334	-0.207746	0.0433985	16.5541	12.9181	-3.63596	0.231836	24	DOWN	NO CHANGE	NO CHANGE
TC1000003090.mm.2	Xrcc6bp1	0.00122257	0.0347203	6.57375	6.3849	-0.188849	0.136896	0.554903	0.20981	-0.345093	0.0594004	12.8708	10.5936	-2.27721	0.347617	24	NO CHANGE	NO CHANGE	NO CHANGE
TC1200001916.mm.2	Trmt5	0.00122489	0.00021359	8.41625	8.19748	-0.21877	0.0647583	0.382858	0.577509	0.194651	0.239943	20.1663	19.2285	-0.937837	0.498201	24	NO CHANGE	NO CHANGE	NO CHANGE
TC0600000609.mm.2	Snx10	0.00122551	0.204127	10.1183	11.6315	1.51315	2.51048e-12	0.580124	0.195983	-0.384141	0.0821825	11.1283	15.2988	4.17058	0.208045	24	NO CHANGE	NO CHANGE	UP
TC0300001482.mm.2	Ddah1	0.00122755	0.0315175	13.9388	7.88788	-6.05087	8.67991e-27	0.391198	0.769076	0.377878	0.27164	4.05696	9.90321	5.84625	0.0280146	24	NO CHANGE	DELAY	DOWN
TC0500003490.mm.2	3110082I17Rik	0.00122852	0.00969002	6.91708	6.73099	-0.186091	0.101535	0.38803	0.330609	-0.0574213	0.713435	6.09236	4.08305	-2.00932	0.24727	24	NO CHANGE	NO CHANGE	NO CHANGE
TC0100001779.mm.2	Rab3gap2	0.00123084	0.0738836	6.63042	6.60538	-0.0250396	0.798469	0.344315	0.197948	-0.146367	0.299644	5.65529	9.51125	3.85596	0.0795407	24	NO CHANGE	NO CHANGE	NO CHANGE
TC1300000405.mm.2	Cdyl	0.00123334	0.0434726	5.9525	5.96512	0.012619	0.893659	0.303987	0.232804	-0.0711831	0.598667	8.54106	10.2607	1.71964	0.374788	24	NO CHANGE	NO CHANGE	NO CHANGE
TC0600000205.mm.2	Spam1	0.00123416	0.181712	2.98875	2.89065	-0.0980952	0.294905	0.297511	0.143211	-0.1543	0.242325	13.9629	18.1073	4.14434	0.143622	24	NO CHANGE	NO CHANGE	NO CHANGE
TC0700001070.mm.2	Fam174b	0.00123606	0.00692041	6.9125	6.96077	0.0482738	0.641285	0.413977	0.273913	-0.140064	0.336082	17.8735	16.8121	-1.06134	0.548119	24	NO CHANGE	NO CHANGE	NO CHANGE
TC0800000831.mm.2	Nwd1	0.00123762	0.21855	3.12208	2.92242	-0.199663	0.0646254	0.412276	0.128047	-0.284229	0.0656778	0.824799	22.7366	-2.08824	0.524238	24	NO CHANGE	NO CHANGE	NO CHANGE
TC0200003376.mm.2	Ndufa8	0.00123801	0.309851	13.9854	14.3542	0.36877	9.43534e-05	0.271673	0.10068	-0.170993	0.162814	16.3344	1.25471	8.92036	0.0143157	24	NO CHANGE	NO CHANGE	UP
TC0400001935.mm.2	Masp2	0.00123892	0.470062	18.3408	18.1932	-0.147619	0.00335981	0.168874	0.0363959	-0.132478	0.0545271	16	18.7404	2.74039	0.598081	24	NO CHANGE	NO CHANGE	DOWN
TC1600001540.mm.2	E130310I04Rik	0.00123958	0.666701	4.88708	5.17468	0.287599	0.0128207	0.304138	0.0577801	-0.246358	0.118395	4.31433	4.15213	-0.162199	0.98325	24	NO CHANGE	NO CHANGE	UP
TC0700000564.mm.2	Prodh2	0.00124081	0.359482	15.3658	14.51	-0.855794	1.67586e-13	0.301237	0.0739083	-0.227329	0.0509157	16.6156	19.7003	3.08469	0.471668	24	NO CHANGE	NO CHANGE	DOWN
TC1100004123.mm.2	Cygb	0.0012421	0.0266087	7.29583	7.73605	0.440218	0.00255051	0.446489	0.364196	-0.082293	0.671748	7.82171	13.7692	5.94748	0.00277568	24	NO CHANGE	DELAY	UP
TC0600001366.mm.2	Pex26	0.00124278	7.64343e-05	5.88333	4.79282	-1.09052	1.78915e-10	0.558639	0.501481	-0.0571579	0.755126	13.2652	17.8612	4.59607	0.00136352	24	NO CHANGE	DELAY	DOWN
TC0700002628.mm.2	Erf	0.00124395	0.000163427	5.68792	5.49484	-0.193075	0.0707185	0.470749	0.339878	-0.130871	0.38435	5.61285	10.3249	4.71201	0.00198014	24	NO CHANGE	DELAY	NO CHANGE
TC1500002346.mm.2	Plec	0.00124497	0.0097369	7.95458	7.09921	-0.855377	6.00268e-10	0.326664	0.361599	0.0349359	0.819699	10.4313	10.52	0.088697	0.957629	24	NO CHANGE	NO CHANGE	DOWN
TC1100000537.mm.2	3010026O09Rik	0.00124858	0.416834	7.76792	6.50982	-1.2581	1.15668e-07	0.803373	0.140609	-0.662764	0.02064	3.59709	5.21877	1.62167	0.772576	24	DOWN	NO CHANGE	DOWN
TC1200000459.mm.2	1700047I17Rik2; Fam177a	0.00125386	0.0315298	6.835	7.76482	0.929821	3.98246e-11	0.280115	0.295184	0.015069	0.918789	12.1023	13.9773	1.87504	0.347532	24	NO CHANGE	NO CHANGE	UP
TC1200000461.mm.2	1700047I17Rik2; Fam177a	0.00125394	0.0315298	6.835	7.76482	0.929821	3.98245e-11	0.280115	0.295184	0.0150694	0.918787	12.1023	13.9773	1.87504	0.347532	24	NO CHANGE	NO CHANGE	UP
TC1700001621.mm.2	1600002H07Rik	0.00125723	0.00023725	12.0354	9.29897	-2.73645	1.79773e-18	0.650314	0.809583	0.159269	0.530302	17.8813	14.9795	-2.90175	0.0390954	24	NO CHANGE	ADVANCE	DOWN
TC0200002961.mm.2	Pfkfb3	0.00125808	0.000467512	7.86125	8.6203	0.759048	0.00766155	1.275	0.667401	-0.6076	0.123634	10.0043	11.0328	1.02844	0.555996	24	NO CHANGE	NO CHANGE	UP
TC1300000187.mm.2	Pom121l2	0.00125953	0.0891058	3.90708	3.79581	-0.11127	0.313247	0.404467	0.198505	-0.205962	0.192621	4.53294	11.347	6.81407	0.00540025	24	NO CHANGE	NO CHANGE	NO CHANGE
TC0100003313.mm.2	Tor1aip1	0.00126775	0.0626519	8.47833	8.62048	0.142143	0.201408	0.343696	0.251885	-0.0918116	0.560047	7.03109	8.77527	1.74418	0.397623	24	NO CHANGE	NO CHANGE	NO CHANGE
TC0300000210.mm.2	Skil	0.00126812	0.0436713	9.7	10.4348	0.734782	1.21013e-07	0.52353	0.164611	-0.35892	0.0322158	20.1307	18.209	-1.92171	0.503553	24	DOWN	NO CHANGE	UP
TC0600000839.mm.2	Polr1a	0.00126975	1.13154e-05	9.48292	9.77786	0.29494	0.0233018	0.575113	0.460754	-0.114359	0.517957	14.8654	14.7397	-0.125716	0.926128	24	NO CHANGE	NO CHANGE	UP
TC0200001972.mm.2	Nop56; Snord57	0.00127278	4.06674e-05	10.0154	10.5334	0.518016	0.00795333	0.844744	0.636657	-0.208087	0.427363	15.8059	15.5124	-0.293465	0.837176	24	NO CHANGE	NO CHANGE	UP
TC0800000022.mm.2	Trappc5	0.00127333	0.0215911	6.03667	5.97998	-0.0566865	0.44948	0.299382	0.162119	-0.137264	0.193343	15.2564	16.4616	1.20522	0.557111	24	NO CHANGE	NO CHANGE	NO CHANGE
TC0600001944.mm.2	Wasl	0.00127404	0.0181433	11.7246	11.9673	0.242698	0.0205995	0.389808	0.241765	-0.148043	0.299889	5.23828	4.83637	-0.401911	0.834483	24	NO CHANGE	NO CHANGE	UP
TC1500002010.mm.2	Celsr1	0.00127466	0.00554285	6.86042	6.7705	-0.0899206	0.682901	0.690957	0.778512	0.0875546	0.778879	19.8871	19.372	-0.515125	0.75063	24	NO CHANGE	NO CHANGE	NO CHANGE
TC0700004302.mm.2	Taok2	0.0012813	0.00159984	9.02083	8.68877	-0.332063	0.00096953	0.382406	0.29733	-0.0850758	0.523067	10.3465	13.0353	2.68878	0.0852989	24	NO CHANGE	NO CHANGE	DOWN
TC1000002422.mm.2	Fam207a	0.00128955	0.138937	5.53292	5.0622	-0.470714	0.000384395	0.379425	0.218807	-0.160617	0.359716	14.9769	11.6232	-3.35365	0.176437	24	NO CHANGE	NO CHANGE	DOWN
TC0900001016.mm.2	Leo1	0.00129072	0.0230449	6.86917	7.38306	0.513889	5.15499e-05	0.433427	0.276375	-0.157052	0.339304	21.464	21.1961	-0.267857	0.885221	24	NO CHANGE	NO CHANGE	UP
TC1600000184.mm.2	Snai2	0.00129102	0.0199516	8.38625	8.18734	-0.198909	0.195768	0.433517	0.468948	0.0354304	0.870634	11.4734	10.6975	-0.775847	0.667819	24	NO CHANGE	NO CHANGE	NO CHANGE
TC0400003953.mm.2	Gm438	0.00129443	0.464515	4.49833	4.39663	-0.101706	0.310722	0.271877	0.0924207	-0.179457	0.212674	6.39614	22	-8.39614	0.0563307	24	NO CHANGE	NO CHANGE	NO CHANGE
TC0300001315.mm.2	Casp6	0.00129481	0.0250423	8.73	7.41849	-1.31151	7.47461e-10	0.581401	0.410097	-0.171304	0.461506	5.05638	4.79449	-0.26189	0.891673	24	NO CHANGE	NO CHANGE	DOWN
TC0200001354.mm.2	Fnbp4	0.00129499	0.00804433	7.03333	7.33621	0.302877	0.00155052	0.34262	0.248715	-0.0939042	0.458139	5.3124	14.2985	8.9861	5.27763e-06	24	NO CHANGE	DELAY	UP
TC0500003660.mm.2	Hsph1	0.00129767	0.00057	11.0308	11.5798	0.548988	0.115904	1.398	1.20394	-0.194062	0.688286	17.3061	17.9051	0.599075	0.680371	24	NO CHANGE	NO CHANGE	NO CHANGE
TC0700001669.mm.2	Pde3b	0.00129959	0.000306525	12.9225	12.5873	-0.335179	0.000321556	0.3054	0.39125	0.0858497	0.484436	14.3435	11.4965	-2.84699	0.0399234	24	NO CHANGE	ADVANCE	DOWN
TC1600000279.mm.2	Ap2m1	0.00130009	0.262614	15.0337	15.3181	0.284325	4.57302e-05	0.240179	0.0672052	-0.172974	0.0541702	7.73473	4.81704	-2.91769	0.445563	24	NO CHANGE	NO CHANGE	UP
TC1900001778.mm.2	Cfap43	0.00130867	0.0168391	5.2725	4.98522	-0.287282	0.0334662	0.483111	0.337805	-0.145306	0.433857	23.8649	1.71801	1.85311	0.314239	24	NO CHANGE	NO CHANGE	DOWN
TC1000000349.mm.2	Cdk19	0.00131019	0.00568053	7.62833	7.35623	-0.272103	0.0203333	0.431609	0.340211	-0.0913974	0.572322	7.00802	8.29055	1.28253	0.427815	24	NO CHANGE	NO CHANGE	DOWN
TC1100004227.mm.2	Stra13	0.00131029	0.0126091	11.3546	10.9953	-0.359306	0.000143947	0.270926	0.262633	-0.00829258	0.945281	18.2342	17.2035	-1.03064	0.559971	24	NO CHANGE	NO CHANGE	DOWN
TC0100003505.mm.2	Hsd17b7	0.00131289	0.643579	13.7075	16.1191	2.41161	1.89073e-22	0.498699	0.0497993	-0.4489	0.0125041	10.6611	15.9589	5.29782	0.591599	24	DOWN	NO CHANGE	UP
TC1300001128.mm.2	Zfp366	0.00131626	0.290558	4.75	4.74482	-0.00517857	0.966477	0.477845	0.126796	-0.351049	0.0512784	2.47427	23.1704	-3.30385	0.388142	24	NO CHANGE	NO CHANGE	NO CHANGE
TC1200001938.mm.2	Wdr89; Rplp2-ps1	0.00131651	0.0824774	7.86708	8.49413	0.627044	0.000132715	0.42427	0.328864	-0.0954056	0.653492	21.0212	19.5776	-1.44358	0.511861	24	NO CHANGE	NO CHANGE	UP
TC0900000117.mm.2	Taf1d; Gm25500	0.00131855	0.0316811	8.54708	8.93647	0.389385	0.000766271	0.404522	0.244275	-0.160247	0.298994	11.6375	12.0099	0.372437	0.849511	24	NO CHANGE	NO CHANGE	UP
TC0500001715.mm.2	Foxk1	0.00132203	0.00138557	7.87583	7.56625	-0.309583	0.0250507	0.515684	0.466973	-0.0487104	0.797193	5.87703	7.07064	1.19361	0.421436	24	NO CHANGE	NO CHANGE	DOWN
TC0300002419.mm.2	Lce1m	0.00132276	0.312966	2.90417	2.93919	0.0350198	0.750802	0.385388	0.119569	-0.265819	0.0943133	21.8283	19.3182	-2.51013	0.49968	24	NO CHANGE	NO CHANGE	NO CHANGE
TC0800001923.mm.2	Ash2l	0.00132467	0.51438	8.38083	8.25863	-0.122202	0.157075	0.294414	0.0595848	-0.23483	0.0565386	6.63019	1.3156	-5.31459	0.350238	24	NO CHANGE	NO CHANGE	NO CHANGE
TC1700000410.mm.2	Luc7l	0.00132598	0.126827	7.10583	6.67565	-0.430179	0.000162037	0.364974	0.169377	-0.195597	0.184408	17.2936	15.3212	-1.97232	0.459263	24	NO CHANGE	NO CHANGE	DOWN
TC0Y00000439.mm.2	Gm20736	0.00132926	0.128045	5.09292	5.41397	0.321052	0.280406	1.02836	0.48964	-0.538721	0.200871	0.451418	1.26629	0.814867	0.751971	24	NO CHANGE	NO CHANGE	NO CHANGE
TC1000000531.mm.2	P4ha1	0.00133731	0.00249837	8.64458	9.09474	0.450159	0.0196076	0.750311	0.552372	-0.19794	0.449254	17.6947	16.4092	-1.28549	0.432059	24	NO CHANGE	NO CHANGE	UP
TC0200005132.mm.2	Acot8	0.00133811	0.137597	6.86292	7.02359	0.160675	0.179051	0.315925	0.219002	-0.096923	0.558687	15.5708	15.3445	-0.226356	0.929449	24	NO CHANGE	NO CHANGE	NO CHANGE
TC1500000160.mm.2	Myo10	0.00134273	0.0156509	9.22708	9.24599	0.0189087	0.870004	0.417274	0.309937	-0.107337	0.51337	9.68253	12.5741	2.89158	0.108584	24	NO CHANGE	NO CHANGE	NO CHANGE
TC0200004046.mm.2	Olfr1225	0.00134642	0.594363	2.9925	2.91403	-0.0784722	0.407829	0.341786	0.0518998	-0.289886	0.0353943	6.71391	19.6828	-11.0312	0.1231	24	DOWN	NO CHANGE	NO CHANGE
TC0900002181.mm.2	Kmt2a	0.00134665	0.11797	6.89417	6.80885	-0.0853175	0.443756	0.386777	0.191091	-0.195686	0.218643	7.60012	7.66443	0.0643103	0.979282	24	NO CHANGE	NO CHANGE	NO CHANGE
TC0100001085.mm.2	3110009E18Rik	0.00134695	0.373812	4.98417	4.92583	-0.0583333	0.719708	0.491622	0.174459	-0.317163	0.177094	19.6921	21.7787	2.08654	0.576622	24	NO CHANGE	NO CHANGE	NO CHANGE
TC0400001677.mm.2	Id3	0.00134765	0.00011564	8.73167	8.70095	-0.0307143	0.915926	1.10083	1.33339	0.232553	0.573048	19.6511	19.1617	-0.489394	0.707916	24	NO CHANGE	NO CHANGE	NO CHANGE
TC0800001095.mm.2	Mt1	0.00134821	0.385226	13.8829	13.0388	-0.844087	0.0956766	1.91051	0.423098	-1.48741	0.0413242	8.41065	11.3506	2.93994	0.521563	24	DOWN	NO CHANGE	NO CHANGE
TC0200001935.mm.2	Mertk	0.00135181	0.00473866	8.52917	9.06786	0.53869	1.29013e-05	0.387861	0.356407	-0.0314539	0.838683	12.2793	13.1884	0.909129	0.569483	24	NO CHANGE	NO CHANGE	UP
TC0600000902.mm.2	Eva1a	0.00135265	0.000612692	9.66167	8.20671	-1.45496	2.80752e-19	0.302153	0.399565	0.0974114	0.449578	7.37034	13.8212	6.45088	5.7284e-05	24	NO CHANGE	DELAY	DOWN
TC0300002361.mm.2	Ubap2l	0.00135664	0.80993	12.6125	13.0629	0.450437	0.000962083	0.456152	0.0313471	-0.424805	0.0219003	6.79738	18.2682	11.4708	0.471226	24	DOWN	NO CHANGE	UP
TC0900002875.mm.2	Atp1b3	0.00135896	0.0782197	10.8833	11.5289	0.645536	1.69816e-07	0.296988	0.224918	-0.0720699	0.6205	14.2694	13.9299	-0.339484	0.878659	24	NO CHANGE	NO CHANGE	UP
TC1200001979.mm.2	Vti1b	0.00136055	0.332978	8.29167	7.94026	-0.351409	0.00056331	0.294179	0.104156	-0.190023	0.155668	15.4899	4.51748	-10.9724	0.00568713	24	NO CHANGE	NO CHANGE	DOWN
TC0100000909.mm.2	Olfr1412	0.0013621	0.00960476	5.90542	5.97635	0.0709325	0.595792	0.362205	0.453967	0.0917621	0.623379	2.58835	3.78085	1.1925	0.511677	24	NO CHANGE	NO CHANGE	NO CHANGE
TC1400000782.mm.2	Dcaf11	0.00136379	0.309638	10.0442	10.2772	0.233036	0.00339895	0.207084	0.0929817	-0.114103	0.282634	18.0133	16.6462	-1.36713	0.69488	24	NO CHANGE	NO CHANGE	UP
TC0700003650.mm.2	Abhd17c	0.00136856	0.000888493	10.4375	10.2723	-0.165238	0.170357	0.475573	0.403003	-0.0725701	0.663846	3.79241	5.03607	1.24366	0.408957	24	NO CHANGE	NO CHANGE	NO CHANGE
TC0300002173.mm.2	Golim4	0.001375	0.0965209	13.1613	13.7016	0.540357	1.86607e-09	0.254429	0.127626	-0.126803	0.214416	16.2128	8.97247	-7.24032	0.00349683	24	NO CHANGE	NO CHANGE	UP
TC0400003260.mm.2	Osbpl9	0.00137576	0.0288453	13.8383	13.6261	-0.212262	0.0269307	0.250808	0.267697	0.0168887	0.898042	7.10339	7.2304	0.127009	0.947751	24	NO CHANGE	NO CHANGE	DOWN
TC1000003078.mm.2	Slc16a7	0.00137647	0.00342524	12.3521	10.3731	-1.97899	1.27494e-13	0.553023	0.706872	0.153849	0.554966	13.9252	12.6892	-1.23606	0.442248	24	NO CHANGE	NO CHANGE	DOWN
TC0700004282.mm.2	Eif3c	0.00137713	0.240622	12.9479	13.1327	0.184782	0.0330915	0.221768	0.12814	-0.0936285	0.439176	9.24936	9.78477	0.535417	0.851966	24	NO CHANGE	NO CHANGE	UP
TC0900002480.mm.2	Smad3	0.00137842	0.138916	8.16667	7.49109	-0.675575	4.57078e-07	0.320599	0.206831	-0.113769	0.477724	3.47211	6.03182	2.55972	0.314369	24	NO CHANGE	NO CHANGE	DOWN
TC1100002029.mm.2	Mrpl12	0.00137869	0.107944	10.2067	10.5798	0.373135	0.000106383	0.301114	0.15244	-0.148674	0.229321	15.2876	14.8668	-0.4208	0.866996	24	NO CHANGE	NO CHANGE	UP
TC1700000339.mm.2	Pgp	0.00137949	0.020442	8.38833	8.65282	0.264484	0.0131342	0.334182	0.287499	-0.0466834	0.749152	15.5609	12.0983	-3.46254	0.0586199	24	NO CHANGE	NO CHANGE	UP
TC1900000226.mm.2	Ms4a4d	0.00138092	0.263576	8.43375	9.24175	0.807996	2.57506e-07	0.505166	0.140112	-0.365053	0.053651	6.24026	17.1104	10.8701	0.0068157	24	NO CHANGE	NO CHANGE	UP
TC1200002299.mm.2	Syne3	0.00138255	0.0367161	5.7725	5.54244	-0.23006	0.111126	0.398375	0.374745	-0.02363	0.905622	10.0554	5.39534	-4.66002	0.0245822	24	NO CHANGE	ADVANCE	NO CHANGE
TC0X00000044.mm.2	Nudt11	0.00138278	0.377029	4.31292	4.25794	-0.0549802	0.629388	0.336174	0.118825	-0.217349	0.17929	2.91061	1.88288	-1.02772	0.794754	24	NO CHANGE	NO CHANGE	NO CHANGE
TC0100003522.mm.2	Fcgr2b	0.00138828	0.0356834	11.3558	11.9676	0.611746	0.000836727	0.512311	0.445893	-0.0664186	0.783465	18.3286	19.111	0.782398	0.68707	24	NO CHANGE	NO CHANGE	UP
TC0900000025.mm.2	Kbtbd3	0.00138944	0.0486807	6.06917	5.85962	-0.209544	0.0473257	0.251368	0.276888	0.0255196	0.862111	21.4941	23.6541	2.16004	0.306598	24	NO CHANGE	NO CHANGE	DOWN
TC1400001554.mm.2	Ap3m1	0.00139006	1.37924e-05	13.1425	13.3086	0.166131	0.161845	0.50015	0.524692	0.0245416	0.883261	10.182	11.735	1.55307	0.210673	24	NO CHANGE	NO CHANGE	NO CHANGE
TC1000003105.mm.2	Pip4k2c	0.00139215	0.0093258	9.23583	9.05438	-0.181448	0.0110756	0.224195	0.221333	-0.00286141	0.976732	6.90606	9.46268	2.55661	0.125611	24	NO CHANGE	NO CHANGE	DOWN
TC0700000762.mm.2	Etfb; Mir7051	0.00139456	0.584478	9.03375	9.39786	0.364107	0.00358641	0.2817	0.084462	-0.197238	0.245519	16.1582	19.7899	3.63167	0.517983	24	NO CHANGE	NO CHANGE	UP
TC0800003000.mm.2	Cdyl2	0.00139557	0.160211	5.38625	5.37121	-0.0150397	0.889165	0.387434	0.159919	-0.227515	0.142025	11.3894	12.6794	1.28994	0.645687	24	NO CHANGE	NO CHANGE	NO CHANGE
TC0300002682.mm.2	Pifo	0.00139925	0.18492	3.26542	3.29232	0.0269048	0.760531	0.294567	0.130854	-0.163713	0.194201	7.89193	0.964058	-6.92787	0.0184068	24	NO CHANGE	NO CHANGE	NO CHANGE
TC1800001541.mm.2	Poli	0.00140276	0.129581	7.21542	6.68018	-0.535238	0.000116102	0.514264	0.169279	-0.344985	0.05841	16.1548	13.4185	-2.73629	0.371012	24	NO CHANGE	NO CHANGE	DOWN
TC0400003386.mm.2	Ptprf	0.00140377	0.107925	10.3362	9.90823	-0.428016	0.00319482	0.374345	0.283219	-0.0911259	0.641434	5.88216	7.87769	1.99553	0.391247	24	NO CHANGE	NO CHANGE	DOWN
TC1100001018.mm.2	Shpk	0.00140449	0.341613	9.47917	9.23006	-0.249107	0.0219062	0.379216	0.105204	-0.274012	0.0737603	12.8334	20.9655	8.13209	0.0436068	24	NO CHANGE	NO CHANGE	DOWN
TC1000003047.mm.2	Rassf3	0.00140475	0.00807524	8.57042	7.68012	-0.890298	7.346e-09	0.496524	0.316024	-0.1805	0.304474	6.53473	6.89542	0.360691	0.839515	24	NO CHANGE	NO CHANGE	DOWN
TC1500001749.mm.2	Naprt	0.00140499	0.0192763	9.99583	9.53056	-0.465278	0.000113901	0.388658	0.285607	-0.10305	0.507248	17.8439	18.8301	0.986229	0.590486	24	NO CHANGE	NO CHANGE	DOWN
TC0600000454.mm.2	Gstk1	0.00140943	0.0975212	14.82	15.26	0.44	6.37297e-05	0.224685	0.220304	-0.00438089	0.97502	20.1772	18.2003	-1.97685	0.417014	24	NO CHANGE	NO CHANGE	UP
TC0600003302.mm.2	Lrp6	0.00140997	0.0106582	10.7942	10.6695	-0.124702	0.229594	0.356126	0.303854	-0.0522714	0.719817	6.15485	7.13512	0.980261	0.565329	24	NO CHANGE	NO CHANGE	NO CHANGE
TC1000002460.mm.2	Casp14	0.00141037	0.734037	3.06	2.72141	-0.338591	0.0010282	0.289872	0.0384023	-0.25147	0.0707209	14.2665	12.9369	-1.32963	0.891771	24	NO CHANGE	NO CHANGE	DOWN
TC0200002945.mm.2	Itih2	0.00141038	0.0110165	15.9283	15.9097	-0.0186508	0.769438	0.18249	0.213504	0.0310138	0.732019	5.48484	8.08769	2.60284	0.139685	24	NO CHANGE	NO CHANGE	NO CHANGE
TC0600000718.mm.2	Tigd2	0.00141192	4.74917e-05	8.48208	8.53611	0.0540278	0.624537	0.460365	0.459918	-0.000447147	0.997714	6.27568	7.17106	0.895378	0.489805	24	NO CHANGE	NO CHANGE	NO CHANGE
TC0700000551.mm.2	Gm5113	0.00141267	0.18048	5.38542	5.42351	0.0380952	0.766676	0.357486	0.208772	-0.148715	0.408974	16.9216	15.8311	-1.09045	0.695202	24	NO CHANGE	NO CHANGE	NO CHANGE
TC0300002728.mm.2	Gstm4	0.00141391	3.54953e-05	13.0692	12.3761	-0.693056	1.00982e-06	0.434255	0.63919	0.204935	0.232231	3.63662	5.02483	1.38821	0.286801	24	NO CHANGE	NO CHANGE	DOWN
TC0700001871.mm.2	Fus	0.00141475	0.00516028	9.59833	9.62788	0.0295437	0.838047	0.506494	0.459313	-0.047181	0.815483	7.00201	4.65882	-2.34319	0.159021	24	NO CHANGE	NO CHANGE	NO CHANGE
TC0800003164.mm.2	Taf5l	0.00141487	0.579169	7.11125	7.04581	-0.0654365	0.567848	0.424373	0.0635928	-0.36078	0.0312522	9.60304	11.8486	2.24556	0.746114	24	DOWN	NO CHANGE	NO CHANGE
TC1800000184.mm.2	Mapre2	0.0014153	0.00439192	8.45417	9.34317	0.889008	1.72367e-08	0.487808	0.38894	-0.0988681	0.586443	12.4119	12.6813	0.269436	0.866992	24	NO CHANGE	NO CHANGE	UP
TC1100003110.mm.2	Camta2	0.00141715	0.873828	7.41125	8.11982	0.708571	5.54122e-06	0.456573	0.0242039	-0.432369	0.031551	4.90429	10.342	5.4377	0.798996	24	DOWN	NO CHANGE	UP
TC1000001561.mm.2	R3hdm2	0.00142386	0.383289	10.9704	10.9502	-0.0201786	0.846674	0.439067	0.0752056	-0.363861	0.0184738	6.61798	9.48527	2.86729	0.590421	24	DOWN	NO CHANGE	NO CHANGE
TC0X00001120.mm.2	Tex16	0.00142724	0.705137	3.66125	3.31258	-0.348671	0.00603277	0.418652	0.0479837	-0.370668	0.0340196	1.15018	14.2985	-10.8517	0.279016	24	DOWN	NO CHANGE	DOWN
TC0500000689.mm.2	Dcun1d4	0.00142745	0.000217555	7.51917	7.00645	-0.512718	6.5166e-05	0.440064	0.503893	0.0638291	0.700239	9.19857	8.86173	-0.336841	0.799205	24	NO CHANGE	NO CHANGE	DOWN
TC1100001431.mm.2	Gm21885	0.00143061	0.581611	4.56417	4.20228	-0.361885	0.0104485	0.416999	0.084823	-0.332176	0.0857235	4.20238	4.79468	0.592298	0.926556	24	NO CHANGE	NO CHANGE	DOWN
TC0Y00000209.mm.2	Gm21095; Sly	0.00143216	0.2683	6.61708	5.91409	-0.702996	0.0144685	0.953771	0.326132	-0.627639	0.111865	2.53062	2.38249	-0.148133	0.966299	24	NO CHANGE	NO CHANGE	DOWN
TC0X00003428.mm.2	Xlr5c	0.0014336	0.00813867	3.93333	3.90323	-0.0300992	0.844442	0.487216	0.495136	0.00791989	0.970634	1.81888	2.45896	0.640081	0.706746	24	NO CHANGE	NO CHANGE	NO CHANGE
TC1000000866.mm.2	Csnk1g2	0.00143369	0.42085	4.905	5.21018	0.305179	0.000770824	0.32003	0.0643597	-0.255671	0.0352297	7.69133	16.244	8.55268	0.110894	24	DOWN	NO CHANGE	UP
TC1500000165.mm.2	Fam134b	0.00143743	0.832123	11.05	10.8319	-0.218095	0.162436	0.677041	0.0238532	-0.653187	0.00484953	6.22815	22.2313	-7.99687	0.743591	24	DOWN	NO CHANGE	NO CHANGE
TC0900002915.mm.2	Pik3cb	0.00143747	0.00779203	8.81292	8.8828	0.0698809	0.463233	0.300679	0.320763	0.0200835	0.88239	10.2569	10.6826	0.425663	0.794697	24	NO CHANGE	NO CHANGE	NO CHANGE
TC0900002218.mm.2	Apoc3	0.00143763	0.0947333	17.5546	18.1037	0.549167	3.55189e-14	0.172024	0.0898726	-0.0821517	0.243104	23.4616	23.0882	-0.3734	0.872315	24	NO CHANGE	NO CHANGE	UP
TC0800002945.mm.2	Rfwd3	0.00144051	0.192729	8.87333	8.56109	-0.312242	0.000277401	0.245767	0.122537	-0.12323	0.277699	6.73356	11.3556	4.62202	0.0962921	24	NO CHANGE	NO CHANGE	DOWN
TC0300003214.mm.2	Scamp3	0.00144566	0.0989848	9.16583	9.23873	0.0728968	0.55082	0.30922	0.25632	-0.0528999	0.756431	13.4002	16.3102	2.90997	0.228915	24	NO CHANGE	NO CHANGE	NO CHANGE
TC0400001393.mm.2	Heyl	0.00144712	0.330173	5.0125	4.98685	-0.0256548	0.828264	0.386364	0.126423	-0.259941	0.121584	0.358907	3.1643	2.8054	0.469234	24	NO CHANGE	NO CHANGE	NO CHANGE
TC1300001537.mm.2	Zkscan3	0.00144887	0.00118225	9.83292	9.16631	-0.666607	3.13061e-08	0.297993	0.420663	0.122669	0.376815	20.5898	17.2491	-3.34077	0.036231	24	NO CHANGE	ADVANCE	DOWN
TC0100000227.mm.2	Cfc1	0.00145001	0.023366	3.2675	3.16873	-0.0987698	0.244161	0.295248	0.212676	-0.0825717	0.488722	23.1079	6.97018	7.86232	0.000126686	24	NO CHANGE	DELAY	NO CHANGE
TC1200000068.mm.2	Pum2	0.00145068	0.0287796	11.0967	11.1797	0.0830357	0.297716	0.305445	0.172056	-0.133389	0.237346	4.29208	6.85161	2.55954	0.212433	24	NO CHANGE	NO CHANGE	NO CHANGE
TC0400002100.mm.2	Ube2j2; Gm5801	0.00145131	0.0684057	10.5954	10.682	0.086627	0.28527	0.289987	0.15527	-0.134717	0.240018	11.3492	13.2297	1.88046	0.408516	24	NO CHANGE	NO CHANGE	NO CHANGE
TC0500003051.mm.2	Coro1c	0.00145427	0.21089	7.48	7.79115	0.311151	0.0148952	0.268995	0.210422	-0.0585734	0.739334	6.65913	10.9802	4.32103	0.129563	24	NO CHANGE	NO CHANGE	UP
TC1200001770.mm.2	Ralgapa1	0.00145702	0.0676693	7.53083	7.74603	0.215198	0.0710099	0.278961	0.284589	0.00562747	0.972766	13.8517	13.3623	-0.489399	0.827408	24	NO CHANGE	NO CHANGE	NO CHANGE
TC0900001523.mm.2	Osbpl10	0.00146802	0.1334	4.575	4.3921	-0.182897	0.0956323	0.381051	0.168974	-0.212077	0.164939	4	4.71918	0.719175	0.792742	24	NO CHANGE	NO CHANGE	NO CHANGE
TC0100000133.mm.2	Tmem14a	0.00147653	0.331719	6.30875	5.96157	-0.347183	0.0035582	0.421709	0.10646	-0.315249	0.0520898	15.1823	2.29128	11.1089	0.0124981	24	NO CHANGE	NO CHANGE	DOWN
TC0100002645.mm.2	Serpine2	0.0014783	0.000622441	6.69375	5.5052	-1.18855	1.21775e-11	0.492995	0.482438	-0.0105565	0.953634	19.0708	18.559	-0.511818	0.720655	24	NO CHANGE	NO CHANGE	DOWN
TC0600002326.mm.2	Inmt	0.00147926	0.00274993	15.1346	11.4342	-3.70038	6.53596e-18	0.60789	1.07209	0.464197	0.195546	16.1047	15.38	-0.724742	0.692701	24	NO CHANGE	NO CHANGE	DOWN
TC1000002897.mm.2	Rab21	0.00148545	0.0174499	10.7179	10.4296	-0.288333	0.00319742	0.308284	0.263875	-0.0444092	0.737518	22.656	21.3809	-1.27504	0.46652	24	NO CHANGE	NO CHANGE	DOWN
TC0600001636.mm.2	Strap	0.00149181	0.00238835	11.4071	11.3516	-0.0554563	0.411026	0.222028	0.255559	0.0335303	0.725911	13.008	11.962	-1.046	0.492751	24	NO CHANGE	NO CHANGE	NO CHANGE
TC0Y00000554.mm.2	Gm10352	0.00149475	0.0139828	3.59583	3.42159	-0.174246	0.184259	0.351268	0.414818	0.0635497	0.726655	2.03924	4.86835	2.82911	0.13407	24	NO CHANGE	NO CHANGE	NO CHANGE
TC1600001048.mm.2	Morc3	0.00149657	0.0101487	7.17333	7.15643	-0.0169048	0.874399	0.442357	0.246255	-0.196102	0.199134	13.3867	13.0433	-0.343336	0.857415	24	NO CHANGE	NO CHANGE	NO CHANGE
TC1000000030.mm.2	Esr1	0.00149658	0.0824194	5.88167	8.29393	2.41226	1.17953e-20	0.517572	0.237221	-0.280351	0.152734	14.4645	16.4902	2.02564	0.422572	24	NO CHANGE	NO CHANGE	UP
TC1800001413.mm.2	Hmgxb3	0.00149729	0.208528	6.55958	6.73685	0.177262	0.0463411	0.283142	0.121919	-0.161223	0.19132	10.705	6.05814	-4.64684	0.128281	24	NO CHANGE	NO CHANGE	UP
TC0700001851.mm.2	Srcap; Tmem265	0.00149981	0.0280945	9.2625	9.22913	-0.0333732	0.726032	0.310608	0.251421	-0.0591871	0.664035	2.41796	21.5825	-4.83543	0.0115154	24	NO CHANGE	ADVANCE	NO CHANGE
TC0400004013.mm.2	Draxin	0.00150276	0.363531	2.86792	2.88798	0.0200595	0.80538	0.250029	0.084781	-0.165248	0.153219	1.61346	14.2976	-11.3159	0.00634492	24	NO CHANGE	NO CHANGE	NO CHANGE
TC0100003536.mm.2	Ppox	0.00150295	0.414386	8.79333	8.35794	-0.435397	3.07283e-06	0.320291	0.0609095	-0.259381	0.0295784	5.2024	11.292	6.08955	0.240455	24	DOWN	NO CHANGE	DOWN
TC0400003483.mm.2	D830031N03Rik; Macf1	0.00150414	0.059936	12.6437	13.102	0.458274	1.53997e-07	0.226002	0.168034	-0.0579687	0.579134	4.87379	9.10597	4.23218	0.0438286	24	NO CHANGE	NO CHANGE	UP
TC0500001251.mm.2	Pop5	0.00150495	0.222161	9.63917	9.46683	-0.172341	0.0664724	0.378833	0.0926395	-0.286194	0.0305859	16.227	16.2882	0.0612496	0.987864	24	DOWN	NO CHANGE	NO CHANGE
TC0100001877.mm.2	Plxna2	0.0015082	0.00678144	8.13542	7.62234	-0.513075	0.000762033	0.552271	0.380289	-0.171981	0.38896	23.6479	14.9195	-8.72846	1.16627e-05	24	NO CHANGE	ADVANCE	DOWN
TC0400003862.mm.2	Arhgef10l	0.00151152	1.13616e-06	8.00542	7.66448	-0.340933	0.0012628	0.438284	0.446749	0.00846557	0.951258	4.455	4.48752	0.0325196	0.978774	24	NO CHANGE	NO CHANGE	DOWN
TC1300001649.mm.2	Slc17a4	0.001518	0.0127035	10.0954	11.0537	0.958274	2.42055e-06	0.52189	0.549556	0.0276665	0.9108	0.989964	2.61534	1.62538	0.366686	24	NO CHANGE	NO CHANGE	UP
TC0100002330.mm.2	1700019D03Rik	0.00152195	0.27049	3.97417	4.13464	0.160476	0.19854	0.41251	0.146802	-0.265708	0.12956	3.33692	16.7009	-10.636	0.00398754	24	NO CHANGE	NO CHANGE	NO CHANGE
TC0700000819.mm.2	Akt1s1; Mir707	0.00152227	0.0783643	9.31292	9.24671	-0.0662103	0.501297	0.358147	0.176	-0.182147	0.190092	23.635	2.80322	3.16817	0.196303	24	NO CHANGE	NO CHANGE	NO CHANGE
TC0500001976.mm.2	4930572O03Rik	0.00152956	0.107281	3.98542	4.27073	0.285317	0.0228864	0.40097	0.216589	-0.184381	0.281249	0.369719	3.16657	2.79685	0.264693	24	NO CHANGE	NO CHANGE	UP
TC0700003977.mm.2	Fam160a2	0.00153676	0.0960278	6.00208	5.76627	-0.235813	0.0156755	0.29199	0.189265	-0.102725	0.446662	7.30946	10.7327	3.42328	0.13174	24	NO CHANGE	NO CHANGE	DOWN
TC0500001575.mm.2	Mlxipl	0.00153973	0.0211915	13.8992	14.4068	0.507659	6.46951e-05	0.275837	0.364991	0.0891539	0.585042	1.98001	0.369559	-1.61045	0.418123	24	NO CHANGE	NO CHANGE	UP
TC0700000663.mm.2	Ankrd27	0.00154282	0.000176599	8.45583	8.70133	0.245496	0.00711962	0.305577	0.419564	0.113988	0.363197	9.35646	9.90144	0.544975	0.682849	24	NO CHANGE	NO CHANGE	UP
TC0600002604.mm.2	Gm5878	0.00154707	0.451997	4.13875	4.40673	0.267976	0.032322	0.356897	0.10622	-0.250677	0.145757	22.3481	4.19058	5.84252	0.218601	24	NO CHANGE	NO CHANGE	UP
TC1700002019.mm.2	H2-M10.2	0.00155758	0.180541	4.66375	4.60669	-0.0570635	0.579165	0.352503	0.146667	-0.205836	0.158486	0.791256	2.28129	1.49003	0.614724	24	NO CHANGE	NO CHANGE	NO CHANGE
TC1400000246.mm.2	Ppif	0.00155871	0.10232	9.81833	10.7629	0.944603	9.07646e-08	0.481024	0.267046	-0.213978	0.300715	12.8779	16.9767	4.09879	0.100205	24	NO CHANGE	NO CHANGE	UP
TC1500001207.mm.2	Rai14	0.00156025	0.00812866	10.0904	9.95772	-0.132698	0.165726	0.335281	0.278141	-0.0571401	0.667815	20.9594	17.9755	-2.98398	0.0854654	24	NO CHANGE	NO CHANGE	NO CHANGE
TC0300000914.mm.2	Aph1a	0.00156593	0.00862818	11.9275	11.7384	-0.189087	0.00764126	0.258478	0.180209	-0.0782699	0.412624	12.4195	17.6045	5.18492	0.00543736	24	NO CHANGE	DELAY	DOWN
TC1000003155.mm.2	Rps26	0.00156617	0.0162627	12.7279	12.8075	0.079623	0.497377	0.386141	0.323799	-0.0623422	0.703416	16.5751	15.4485	-1.12657	0.538703	24	NO CHANGE	NO CHANGE	NO CHANGE
TC1000001821.mm.2	Slc35d3	0.00156988	0.312742	3.27583	3.32258	0.046746	0.607968	0.302173	0.103042	-0.199131	0.130799	3.77866	23.029	-4.74963	0.183507	24	NO CHANGE	NO CHANGE	NO CHANGE
TC0100002392.mm.2	Trak2	0.00157006	0.0064183	7.96875	9.34054	1.37179	5.35173e-18	0.388481	0.231113	-0.157368	0.243248	9.43021	10.6593	1.22909	0.491086	24	NO CHANGE	NO CHANGE	UP
TC0500000934.mm.2	Bmp2k	0.00157126	0.00211094	9.42833	9.5502	0.121865	0.146204	0.28989	0.301229	0.0113391	0.923134	7.48234	12.3623	4.87996	0.00226501	24	NO CHANGE	DELAY	NO CHANGE
TC1200000751.mm.2	Smoc1	0.00157203	0.279259	9.7725	9.108	-0.664504	1.34884e-08	0.300334	0.118452	-0.181882	0.182132	9.30782	8.23945	-1.06837	0.744028	24	NO CHANGE	NO CHANGE	DOWN
TC0700001854.mm.2	Phkg2	0.00157203	0.406947	8.35	8.25688	-0.0931151	0.356	0.278549	0.102955	-0.175594	0.223322	6.7975	8.19294	1.39545	0.724545	24	NO CHANGE	NO CHANGE	NO CHANGE
TC0400001255.mm.2	Gpbp1l1	0.00157379	0.0237393	9.59125	9.28274	-0.308512	0.00638475	0.372092	0.277513	-0.0945783	0.538787	5.32227	7.91069	2.58841	0.166189	24	NO CHANGE	NO CHANGE	DOWN
TC0600003148.mm.2	Cd9	0.00157776	0.829302	8.87125	8.38446	-0.486786	0.0034802	0.4946	0.0380821	-0.456518	0.0447218	4.90959	14.1967	9.28713	0.569144	24	DOWN	NO CHANGE	DOWN
TC0700000991.mm.2	Chsy1	0.00157919	0.460397	6.50292	6.71526	0.212341	0.0368021	0.325782	0.0791823	-0.2466	0.0813387	8.82218	17.533	8.71081	0.0894288	24	NO CHANGE	NO CHANGE	UP
TC0Y00000156.mm.2	Gm20736	0.00158141	0.319855	4.86333	5.83514	0.971806	0.00231598	1.05524	0.314699	-0.740542	0.0880135	1.82752	0.720731	-1.10679	0.773112	24	NO CHANGE	NO CHANGE	UP
TC0X00002527.mm.2	Gm7173; Chdc2	0.00158154	0.081842	3.25125	3.11887	-0.132381	0.177674	0.294605	0.206721	-0.0878842	0.527062	2.04679	8.76511	6.71832	0.00339724	24	NO CHANGE	NO CHANGE	NO CHANGE
TC0200000989.mm.2	4933409G03Rik	0.00158329	0.287562	4.43875	4.33409	-0.104663	0.489527	0.440229	0.196756	-0.243474	0.263318	23.9997	10.3367	10.337	0.00214112	24	NO CHANGE	NO CHANGE	NO CHANGE
TC1000000534.mm.2	Pla2g12b	0.0015837	0.00207803	8.62125	8.62528	0.00402778	0.973084	0.455028	0.381651	-0.0733772	0.66049	23.597	3.78582	4.1888	0.0110579	24	NO CHANGE	DELAY	NO CHANGE
TC1700000882.mm.2	Xpo5	0.00158479	0.000378428	8.88375	8.9249	0.0411508	0.597554	0.277498	0.333952	0.0564542	0.608931	11.6612	12.8152	1.15406	0.407833	24	NO CHANGE	NO CHANGE	NO CHANGE
TC0900001103.mm.2	Bckdhb	0.00158565	0.0021792	11.5358	12.1377	0.601905	5.3051e-10	0.264575	0.272963	0.00838851	0.937602	11.2738	8.91498	-2.35879	0.119789	24	NO CHANGE	NO CHANGE	UP
TC1300002176.mm.2	Fbp1	0.00158595	0.0331162	17.2633	15.9186	-1.34472	8.59977e-20	0.209136	0.227829	0.0186925	0.870581	15.7182	18.0807	2.36251	0.248377	24	NO CHANGE	NO CHANGE	DOWN
TC1200000875.mm.2	Ahsa1	0.00158742	0.00479523	10.9833	11.0077	0.0244048	0.840779	0.43211	0.390462	-0.041648	0.80918	17.7063	19.6349	1.92867	0.231134	24	NO CHANGE	NO CHANGE	NO CHANGE
TC1500001933.mm.2	Polr3h	0.00158775	0.00387434	5.72833	5.58304	-0.145298	0.166748	0.360678	0.345817	-0.0148606	0.918975	14.1453	13.9066	-0.238643	0.881348	24	NO CHANGE	NO CHANGE	NO CHANGE
TC1200000856.mm.2	Vash1	0.00159423	0.237676	3.57708	3.52859	-0.0484921	0.63803	0.356529	0.127461	-0.229068	0.118273	14.5118	14.3817	-0.130141	0.969005	24	NO CHANGE	NO CHANGE	NO CHANGE
TC0800000511.mm.2	Mtnr1a	0.00159586	0.488597	6.0825	5.49161	-0.590893	0.00325951	0.614594	0.149913	-0.464681	0.0930676	1.97757	22.7589	-3.21867	0.51573	24	NO CHANGE	NO CHANGE	DOWN
TC1500000296.mm.2	Atp6v1c1	0.00159628	0.000403387	10.2292	10.5856	0.356389	2.48957e-06	0.254027	0.253451	-0.000575859	0.995071	8.70572	12.2094	3.50371	0.015142	24	NO CHANGE	DELAY	UP
TC0200002722.mm.2	Gm11007; 0610010B08Rik	0.00160138	0.000590402	12.5371	12.8229	0.285774	0.0110867	0.387504	0.435364	0.0478606	0.753303	18.1779	18.2906	0.112743	0.937141	24	NO CHANGE	NO CHANGE	UP
TC0200002724.mm.2	Gm11007; Gm14308	0.00160143	0.000590404	12.5371	12.8229	0.285774	0.0110867	0.387504	0.435367	0.0478629	0.753291	18.1779	18.2906	0.112727	0.93715	24	NO CHANGE	NO CHANGE	UP
TC0800000971.mm.2	Klf1	0.00160181	0.0266827	3.43667	3.32188	-0.114782	0.18143	0.263397	0.223401	-0.0399956	0.736419	11.3687	3.77155	-7.59717	0.000297752	24	NO CHANGE	ADVANCE	NO CHANGE
TC0300001530.mm.2	Usp33	0.00161147	0.124515	9.34292	9.14649	-0.196429	0.0387065	0.300508	0.160256	-0.140252	0.28518	14.9927	13.6999	-1.29278	0.610166	24	NO CHANGE	NO CHANGE	DOWN
TC0600003235.mm.2	Clec1a	0.00161156	0.0771843	5.40208	5.792	0.389921	0.00372648	0.360835	0.280242	-0.0805937	0.654859	14.863	13.2657	-1.59726	0.471598	24	NO CHANGE	NO CHANGE	UP
TC0X00001178.mm.2	Pcdh11x	0.00161183	0.171398	3.12833	3.15813	0.0298016	0.782536	0.356564	0.168153	-0.188411	0.226377	10.993	22.4271	11.4341	0.000105321	24	NO CHANGE	NO CHANGE	NO CHANGE
TC0400002551.mm.2	Rnf38	0.00161439	0.00741318	6.54833	6.3224	-0.225933	0.114221	0.467912	0.458708	-0.00920419	0.963551	4.44317	9.49981	5.05664	0.00319112	24	NO CHANGE	DELAY	NO CHANGE
TC0500001763.mm.2	Arpc1a	0.00162072	0.0237493	8.87583	8.84143	-0.0344047	0.710495	0.292241	0.256669	-0.0355719	0.788062	14.6254	11.044	-3.58136	0.0540037	24	NO CHANGE	NO CHANGE	NO CHANGE
TC0700004320.mm.2	Dctpp1	0.00162455	0.0319926	9.38333	9.00177	-0.381567	0.000452991	0.392121	0.202282	-0.189839	0.182147	13.6903	15.6334	1.94305	0.377531	24	NO CHANGE	NO CHANGE	DOWN
TC1100003775.mm.2	Acly	0.00162479	0.0245394	13.7433	13.5035	-0.239821	0.387662	0.6185	0.881843	0.263344	0.506232	17.3506	21.3941	4.04353	0.0551485	24	NO CHANGE	NO CHANGE	NO CHANGE
TC1900001552.mm.2	Chuk	0.00162683	0.0273871	11.6446	12.0668	0.422242	7.47004e-05	0.314235	0.248561	-0.0656743	0.630242	9.28526	6.73222	-2.55304	0.183672	24	NO CHANGE	NO CHANGE	UP
TC1700001384.mm.2	Tmem181b-ps; Tmem181a	0.00163265	0.206482	8.15	7.98012	-0.169881	0.0702222	0.328684	0.119931	-0.208753	0.114166	9.12	7.11238	-2.00762	0.52377	24	NO CHANGE	NO CHANGE	NO CHANGE
TC0300000771.mm.2	Ube2q1	0.00164355	0.214909	9.97417	10.1054	0.13127	0.211562	0.365836	0.136509	-0.229327	0.126408	8.53248	7.8245	-0.707978	0.819913	24	NO CHANGE	NO CHANGE	NO CHANGE
TC1400001902.mm.2	Fermt2	0.00164367	0.031511	10.2692	10.1889	-0.0802381	0.522454	0.395018	0.317768	-0.0772507	0.661147	0.668196	1.90952	1.24133	0.524963	24	NO CHANGE	NO CHANGE	NO CHANGE
TC0900003002.mm.2	Glyctk	0.00165202	0.000620933	10.2525	9.45478	-0.797718	1.04917e-06	0.454701	0.611926	0.157225	0.427142	17.4034	18.2501	0.84663	0.564344	24	NO CHANGE	NO CHANGE	DOWN
TC0600002722.mm.2	Nup210	0.00165259	0.104556	7.16292	7.00919	-0.15373	0.208874	0.357789	0.232638	-0.125151	0.461409	9.39653	16.35	6.95352	0.0061441	24	NO CHANGE	NO CHANGE	NO CHANGE
TC1000001063.mm.2	Pah	0.0016534	8.77009e-05	18.2746	18.3047	0.0301389	0.540922	0.206781	0.184446	-0.0223343	0.749248	14.7786	7.67745	-7.10114	4.97442e-06	24	NO CHANGE	ADVANCE	NO CHANGE
TC0800000975.mm.2	Hook2	0.00165844	0.159911	6.75583	5.63988	-1.11595	1.85567e-10	0.531575	0.165534	-0.366041	0.0570782	8.836	13.7285	4.89252	0.141617	24	NO CHANGE	NO CHANGE	DOWN
TC1200000679.mm.2	Hspa2	0.00165933	3.9285e-05	4.33042	4.1353	-0.195119	0.091149	0.454626	0.495715	0.0410884	0.796526	14.9433	17.6866	2.7433	0.039976	24	NO CHANGE	DELAY	NO CHANGE
TC0300002664.mm.2	Wnt2b	0.00166034	0.170068	3.79583	3.70252	-0.0933135	0.412732	0.410054	0.155292	-0.254762	0.113833	22.9787	4.54405	5.56531	0.0751961	24	NO CHANGE	NO CHANGE	NO CHANGE
TC0400003537.mm.2	Ago3	0.00167139	0.000288683	7.09292	6.99935	-0.0935714	0.330622	0.333254	0.419511	0.0862565	0.520475	12.4885	14.9388	2.4503	0.0871652	24	NO CHANGE	NO CHANGE	NO CHANGE
TC0500001023.mm.2	Ibsp	0.00167511	0.293253	3.90625	3.93345	0.0272024	0.775358	0.301335	0.115893	-0.185441	0.17762	19.5021	11.1594	-8.34267	0.0159142	24	NO CHANGE	NO CHANGE	NO CHANGE
TC1300001033.mm.2	Dhfr	0.00167667	0.405505	10.1033	9.33692	-0.766409	6.15727e-09	0.332683	0.101663	-0.23102	0.131334	7.75106	10.5168	2.76571	0.5014	24	NO CHANGE	NO CHANGE	DOWN
TC1100001095.mm.2	Fam57a	0.00167766	7.58829e-05	8.72708	9.13794	0.410853	0.00266152	0.492659	0.584453	0.0917934	0.615246	18.1847	18.64	0.455233	0.728441	24	NO CHANGE	NO CHANGE	UP
TC0900000725.mm.2	Stra6	0.00169021	0.031525	3.97208	4.14605	0.173968	0.105875	0.366382	0.25563	-0.110752	0.464774	2.98913	23.3776	-3.6115	0.0646614	24	NO CHANGE	NO CHANGE	NO CHANGE
TC1800000344.mm.2	Wdr55	0.00169036	0.0449571	8.13208	7.94296	-0.189127	0.121684	0.350254	0.303372	-0.0468819	0.784515	16.75	20.1369	3.38691	0.0949947	24	NO CHANGE	NO CHANGE	NO CHANGE
TC1400001054.mm.2	Lcp1	0.00169075	0.00130411	13.4538	12.9906	-0.463135	6.56256e-06	0.327095	0.336598	0.00950264	0.941288	8.28244	10.2541	1.97163	0.179233	24	NO CHANGE	NO CHANGE	DOWN
TC1300000938.mm.2	Fam172a	0.00169079	0.954885	7.13542	7.01224	-0.123175	0.0949733	0.266342	0.00393417	-0.262408	0.0130505	8.06574	17.5653	9.49957	0.895497	24	DOWN	NO CHANGE	NO CHANGE
TC0100001262.mm.2	Kif21b	0.00169671	0.151853	4.3025	4.58361	0.281111	0.00870202	0.245884	0.189526	-0.0563579	0.695833	3.61747	14.4032	10.7857	0.000188941	24	NO CHANGE	NO CHANGE	UP
TC0X00003042.mm.2	Tmsb15b2; Tmsb15b1; Tmsb15l	0.00169761	0.0353181	5.38333	4.9949	-0.388433	0.0597827	0.708622	0.468129	-0.240492	0.405182	5.89106	11.6075	5.71646	0.00549086	24	NO CHANGE	DELAY	NO CHANGE
TC1100002871.mm.2	Tom1l2	0.00169881	0.00311676	5.87875	6.2396	0.360853	0.000269129	0.310833	0.310915	8.133e-05	0.99949	6	15.7649	9.76487	2.75181e-07	24	NO CHANGE	DELAY	UP
TC0700000733.mm.2	Zfp788	0.00170234	0.00510362	6.32583	6.62847	0.302639	0.0475785	0.504488	0.480769	-0.023719	0.909463	16.2083	15.2391	-0.96922	0.559041	24	NO CHANGE	NO CHANGE	UP
TC1500002037.mm.2	Hdac10	0.00170313	0.115426	6.11375	6.13583	0.0220833	0.851059	0.378165	0.206581	-0.171584	0.299847	16.409	15.5211	-0.887933	0.726364	24	NO CHANGE	NO CHANGE	NO CHANGE
TC1700000391.mm.2	Jmjd8	0.00170385	0.00228974	12.2629	11.9907	-0.272262	0.000102642	0.205398	0.243949	0.0385516	0.670001	18.7292	19.5394	0.810247	0.599683	24	NO CHANGE	NO CHANGE	DOWN
TC1000002493.mm.2	Gamt	0.00170797	0.00691833	13.7963	12.8333	-0.962917	3.54577e-13	0.300869	0.305417	0.00454817	0.972454	15.1248	11.4615	-3.66335	0.0293109	24	NO CHANGE	ADVANCE	DOWN
TC0200002683.mm.2	Pck1	0.00170907	0.000182827	15.8708	15.7531	-0.117778	0.665145	1.0306	1.16864	0.138043	0.722485	5.61686	9.1485	3.53164	0.0107133	24	NO CHANGE	DELAY	NO CHANGE
TC1300002038.mm.2	Rnf44	0.00171069	0.540473	3.94	4.0395	0.099504	0.386578	0.441956	0.0648772	-0.377079	0.0251689	4.13686	8.74535	4.60848	0.496642	24	DOWN	NO CHANGE	NO CHANGE
TC1000002467.mm.2	Plpp2	0.00171162	0.0362326	9.4475	8.8975	-0.55	0.000102221	0.335746	0.359568	0.0238228	0.896844	11.159	10.9925	-0.166513	0.933034	24	NO CHANGE	NO CHANGE	DOWN
TC0200002367.mm.2	Acss2	0.00171229	0.00111658	11.3313	13.3755	2.04427	5.09761e-13	0.562284	0.90275	0.340466	0.23286	21.1347	23.5774	2.4427	0.125924	24	NO CHANGE	NO CHANGE	UP
TC1800001431.mm.2	Ablim3	0.00171293	0.0132442	7.98375	6.41006	-1.57369	2.70679e-11	0.468553	0.563715	0.0951614	0.698181	20.7729	16.2806	-4.49236	0.0203542	24	NO CHANGE	ADVANCE	DOWN
TC1600000952.mm.2	N6amt1	0.00171359	0.16924	5.63083	5.69667	0.0658333	0.480444	0.285819	0.145933	-0.139886	0.28535	5.79737	4.17457	-1.6228	0.563241	24	NO CHANGE	NO CHANGE	NO CHANGE
TC0400002873.mm.2	Tmem261	0.00171664	0.00029508	12.4558	12.1864	-0.269425	0.000135104	0.233222	0.27746	0.0442385	0.629259	19.1397	19.9219	0.782145	0.56827	24	NO CHANGE	NO CHANGE	DOWN
TC0300002257.mm.2	Fam160a1	0.0017189	0.0346684	4.91042	4.48304	-0.427381	0.00233772	0.512024	0.273197	-0.238827	0.211055	2.21007	23.2002	-3.00986	0.153493	24	NO CHANGE	NO CHANGE	DOWN
TC1200001939.mm.2	Sgpp1	0.00172301	0.0027623	11.9629	12.187	0.224087	0.00139203	0.249872	0.202757	-0.0471149	0.61043	22.6877	17.7798	-4.90795	0.00386119	24	NO CHANGE	ADVANCE	UP
TC0900002778.mm.2	Gm17530	0.00172411	0.00149796	8.08917	11.1432	3.05405	4.42296e-10	0.879919	1.73769	0.85777	0.111551	13.0439	17.6899	4.64593	0.0145666	24	NO CHANGE	DELAY	UP
TC0400003760.mm.2	Srrm1	0.00172736	0.112622	10.6679	10.5216	-0.146349	0.129992	0.220876	0.202999	-0.0178768	0.895048	6.47549	7.9313	1.45581	0.548892	24	NO CHANGE	NO CHANGE	NO CHANGE
TC0900000888.mm.2	Vps13c	0.00172768	0.651768	10.9242	10.9998	0.0756349	0.261695	0.253317	0.0285616	-0.224755	0.0222973	6.43624	20.1964	-10.2398	0.257912	24	DOWN	NO CHANGE	NO CHANGE
TC0700004431.mm.2	Adam12	0.00173158	0.0114112	3.20667	3.10113	-0.105536	0.201199	0.226524	0.26547	0.0389455	0.733722	2.50037	4.92985	2.42948	0.187653	24	NO CHANGE	NO CHANGE	NO CHANGE
TC1700000531.mm.2	Ubash3a	0.00173488	0.0450999	3.77417	3.83226	0.0580952	0.491759	0.27081	0.200105	-0.0707056	0.557587	0.418101	23.0892	-1.32886	0.503556	24	NO CHANGE	NO CHANGE	NO CHANGE
TC1200001900.mm.2	Ccdc175	0.00173742	0.667242	4.30792	4.17228	-0.135635	0.333401	0.367141	0.0734342	-0.293707	0.140097	23.2142	1.64376	2.42955	0.74706	24	NO CHANGE	NO CHANGE	NO CHANGE
TC1000000493.mm.2	Gja1	0.00173906	0.0964662	5.41583	5.86413	0.448294	0.000625203	0.318429	0.253041	-0.0653887	0.701047	12.1249	15.7722	3.6473	0.131796	24	NO CHANGE	NO CHANGE	UP
TC0Y00000169.mm.2	LOC100862125	0.00174027	0.0744138	6.38042	5.49944	-0.880972	0.00258837	0.916739	0.546153	-0.370587	0.342528	0.940008	2.04711	1.1071	0.627928	24	NO CHANGE	NO CHANGE	DOWN
TC0100003155.mm.2	Nr5a2	0.00174039	0.0270179	11.9025	11.324	-0.578452	1.57017e-06	0.390177	0.229324	-0.160853	0.275771	3.70193	6.65578	2.95385	0.149495	24	NO CHANGE	NO CHANGE	DOWN
TC0700000818.mm.2	Gm21948; Il4i1; Nup62	0.00174857	0.012902	7.18125	7.54246	0.36121	0.00807117	0.345691	0.422303	0.0766124	0.674833	3.98619	3.75936	-0.226828	0.903794	24	NO CHANGE	NO CHANGE	UP
TC0100001294.mm.2	Dennd1b	0.00175157	0.0305032	6.75958	7.0645	0.304921	0.0133804	0.445656	0.262059	-0.183596	0.282415	8.5555	9.20534	0.649842	0.743667	24	NO CHANGE	NO CHANGE	UP
TC1700001766.mm.2	Srpk1	0.0017518	0.0391881	10.8454	11.1621	0.316667	0.00254986	0.373422	0.198989	-0.174433	0.21378	17.1288	14.5841	-2.54465	0.250913	24	NO CHANGE	NO CHANGE	UP
TC0800002842.mm.2	Psmb10	0.0017555	0.198658	7.58458	8.53768	0.953095	6.63865e-08	0.456144	0.2198	-0.236344	0.260583	11.9512	9.07546	-2.87569	0.305414	24	NO CHANGE	NO CHANGE	UP
TC0X00000068.mm.2	Tfe3	0.00175566	0.1388	7.67667	7.6926	0.0159325	0.904694	0.532233	0.167879	-0.364353	0.0555502	4.50685	3.54886	-0.957988	0.769566	24	NO CHANGE	NO CHANGE	NO CHANGE
TC0500001610.mm.2	Ift22	0.00175951	0.155443	3.59625	3.80149	0.205238	0.0998888	0.352606	0.20784	-0.144766	0.401907	13.0279	17.3949	4.367	0.106819	24	NO CHANGE	NO CHANGE	NO CHANGE
TC0700002839.mm.2	Chst8	0.00175953	0.369335	6.71	6.3147	-0.395298	0.0115148	0.430565	0.163861	-0.266704	0.217353	0.721387	23.686	-1.03535	0.781664	24	NO CHANGE	NO CHANGE	DOWN
TC1700000365.mm.2	BC003965	0.00176348	0.250026	5.17708	5.23405	0.0569643	0.523797	0.329423	0.101254	-0.228169	0.0774321	15.6031	12.0584	-3.54473	0.316387	24	NO CHANGE	NO CHANGE	NO CHANGE
TC1100001348.mm.2	Rnf43; 1110028F11Rik	0.00176651	0.0142282	6.80458	6.57915	-0.225437	0.0117755	0.272941	0.259624	-0.0133165	0.91384	9.9495	9.98938	0.0398756	0.981572	24	NO CHANGE	NO CHANGE	DOWN
TC1700001021.mm.2	Alkbh7	0.00177015	0.000668642	7.37083	7.68478	0.313948	0.00286455	0.282505	0.481078	0.198573	0.16824	21.4122	21.7419	0.329736	0.830844	24	NO CHANGE	NO CHANGE	UP
TC0100003279.mm.2	Dhx9	0.00177307	3.93743e-05	10.7937	10.6706	-0.123175	0.168016	0.315921	0.46686	0.150939	0.236191	9.34233	9.92323	0.580909	0.648842	24	NO CHANGE	NO CHANGE	NO CHANGE
TC1400002008.mm.2	Gm17175	0.00178571	0.308651	3.22167	3.20651	-0.0151587	0.896357	0.412455	0.122632	-0.289823	0.0858986	22.6854	20.2288	-2.45658	0.515677	24	NO CHANGE	NO CHANGE	NO CHANGE
TC0100001855.mm.2	Lpgat1	0.00179037	0.00711206	13.8879	13.9869	0.0989484	0.284339	0.332663	0.263157	-0.0695054	0.590328	15.2049	17.7744	2.56954	0.139906	24	NO CHANGE	NO CHANGE	NO CHANGE
TC0300000054.mm.2	Zbtb10	0.00179724	0.00622862	5.96833	5.98433	0.0159921	0.911908	0.523007	0.436607	-0.0864003	0.675579	6.34835	8.67281	2.32446	0.15975	24	NO CHANGE	NO CHANGE	NO CHANGE
TC0800003072.mm.2	Rnf166	0.00179784	0.02664	4.46708	4.93869	0.471607	0.000382206	0.402036	0.308267	-0.0937694	0.585843	9.61537	14.7366	5.12119	0.01129	24	NO CHANGE	DELAY	UP
TC1400001931.mm.2	Wdhd1	0.00180211	0.0383327	4.91333	4.92387	0.0105357	0.952132	0.508413	0.458899	-0.0495141	0.84314	15.0544	11.563	-3.49133	0.0794383	24	NO CHANGE	NO CHANGE	NO CHANGE
TC1600000266.mm.2	Klhl24	0.00180348	0.00454776	11.1988	10.7258	-0.472976	0.0593574	0.838393	0.801613	-0.0367796	0.915197	5.19843	6.20348	1.00505	0.537562	24	NO CHANGE	NO CHANGE	NO CHANGE
TC0300002752.mm.2	Stxbp3	0.00180413	0.0351641	9.78333	9.55871	-0.224623	0.0426781	0.368988	0.246531	-0.122457	0.419528	3.27095	3.3722	0.101247	0.960654	24	NO CHANGE	NO CHANGE	DOWN
TC0X00001343.mm.2	Zcchc18	0.00180443	0.245711	2.54042	2.60397	0.0635516	0.487604	0.289982	0.11692	-0.173061	0.179786	22.3522	16.0415	-6.31076	0.0617232	24	NO CHANGE	NO CHANGE	NO CHANGE
TC0200005151.mm.2	Trp53rka	0.00180775	0.894187	6.78542	6.63151	-0.153909	0.188044	0.378602	0.0169324	-0.36167	0.0328852	18.2915	8.31816	-9.97337	0.701935	24	DOWN	NO CHANGE	NO CHANGE
TC0400003749.mm.2	Tmem50a	0.00180795	0.0124111	11.0825	10.751	-0.331488	0.00538703	0.345744	0.357641	0.011897	0.941431	11.9309	8.68713	-3.24382	0.066003	24	NO CHANGE	NO CHANGE	DOWN
TC1000000574.mm.2	Aifm2	0.00181497	4.58017e-07	6.34083	6.042	-0.298829	0.0163433	0.481089	0.714809	0.23372	0.1702	14.9377	14.4399	-0.497794	0.665395	24	NO CHANGE	NO CHANGE	DOWN
TC1100000995.mm.2	Mybbp1a	0.00181596	0.237566	9.47333	9.24139	-0.231944	0.0236967	0.287179	0.137882	-0.149297	0.286613	14.9505	17.1807	2.2302	0.476213	24	NO CHANGE	NO CHANGE	DOWN
TC0X00002158.mm.2	Zdhhc9	0.00181714	4.68213e-05	12.0321	12.6381	0.605992	6.86449e-10	0.299654	0.340113	0.040459	0.70837	8.12219	7.22549	-0.8967	0.489287	24	NO CHANGE	NO CHANGE	UP
TC0600001313.mm.2	Cxcl12	0.00181746	0.0299224	15.6479	15.5413	-0.106567	0.173221	0.249066	0.195082	-0.0539842	0.621269	18.9849	18.5564	-0.428428	0.824881	24	NO CHANGE	NO CHANGE	NO CHANGE
TC0200004926.mm.2	Plagl2	0.00182241	0.0247037	6.79708	6.75474	-0.0423413	0.621325	0.270189	0.224223	-0.0459665	0.70154	2.14287	5.05123	2.90836	0.135335	24	NO CHANGE	NO CHANGE	NO CHANGE
TC1300001794.mm.2	Eci2	0.00182532	0.000354673	14.7904	13.7747	-1.01567	1.76978e-09	0.380746	0.679725	0.298979	0.120955	10.348	10.615	0.267032	0.859681	24	NO CHANGE	NO CHANGE	DOWN
TC0200000422.mm.2	Edf1	0.00182556	0.310435	11.9967	11.9375	-0.0591667	0.511373	0.278722	0.101807	-0.176916	0.164105	15.8744	16.4702	0.595825	0.871783	24	NO CHANGE	NO CHANGE	NO CHANGE
TC1700001781.mm.2	Ppil1	0.00182708	0.126693	4.2825	4.47212	0.189623	0.0480528	0.310406	0.161304	-0.149102	0.268863	16.743	22.6699	5.92692	0.0204126	24	NO CHANGE	NO CHANGE	UP
TC0800002941.mm.2	Glg1	0.00182728	0.0172339	10.4446	10.533	0.0883929	0.318547	0.252999	0.271709	0.0187106	0.88177	5.76012	8.95205	3.19193	0.0815785	24	NO CHANGE	NO CHANGE	NO CHANGE
TC0600002567.mm.2	Tet3	0.00182979	0.0697083	7.38292	7.57859	0.195675	0.0901533	0.386411	0.223671	-0.16274	0.312342	3.50851	6.63619	3.12768	0.17104	24	NO CHANGE	NO CHANGE	NO CHANGE
TC1700002422.mm.2	Ndufv2	0.0018317	0.225978	13.2275	13.7813	0.55375	5.47685e-07	0.349381	0.110764	-0.238617	0.079413	17.0188	7.69794	-9.32082	0.0087633	24	NO CHANGE	NO CHANGE	UP
TC0X00000990.mm.2	Pin4	0.00183295	0.00317868	9.98458	10.0663	0.0816667	0.451104	0.457212	0.264327	-0.192885	0.213932	18.0904	20.1445	2.05409	0.25635	24	NO CHANGE	NO CHANGE	NO CHANGE
TC1100002909.mm.2	Slc47a1	0.00183822	0.111575	11.6383	11.1607	-0.477639	0.00208545	0.475955	0.259326	-0.216629	0.296042	18.6049	18.2837	-0.32115	0.897148	24	NO CHANGE	NO CHANGE	DOWN
TC1300002240.mm.2	Zfp708; Rslcan18	0.00183868	0.00271292	9.1	8.91435	-0.185655	0.02364	0.242036	0.299307	0.057271	0.606855	19.0023	15.4872	-3.51512	0.035152	24	NO CHANGE	ADVANCE	DOWN
TC0500003566.mm.2	Aimp2	0.0018407	0.110825	8.79417	8.44692	-0.347242	0.00719541	0.383995	0.224995	-0.159	0.360904	13.8636	14.5981	0.734557	0.766712	24	NO CHANGE	NO CHANGE	DOWN
TC0800000262.mm.2	Defb10	0.00184104	0.122744	4.09875	3.90482	-0.193929	0.20125	0.473498	0.263781	-0.209717	0.324036	3.39922	1.84768	-1.55154	0.53969	24	NO CHANGE	NO CHANGE	NO CHANGE
TC1900000065.mm.2	AI837181	0.00184321	0.000341493	7.36208	7.07181	-0.290278	0.0286562	0.466026	0.526941	0.0609153	0.735754	2.63586	2.80995	0.174088	0.902338	24	NO CHANGE	NO CHANGE	DOWN
TC0500001180.mm.2	Tfip11	0.00184793	0.299297	6.5375	6.38355	-0.153948	0.152563	0.338478	0.120807	-0.217671	0.148011	20.0235	15.7369	-4.28658	0.246833	24	NO CHANGE	NO CHANGE	NO CHANGE
TC0100003739.mm.2	44257	0.00185295	0.0450762	12.9942	11.927	-1.06714	2.15703e-15	0.278689	0.203078	-0.0756109	0.540747	15.3747	12.5811	-2.79366	0.172615	24	NO CHANGE	NO CHANGE	DOWN
TC0400000162.mm.2	Cngb3	0.00185426	0.227334	3.36083	3.19889	-0.161944	0.109618	0.27749	0.149609	-0.127881	0.371208	16.1951	20.9934	4.79834	0.0993653	24	NO CHANGE	NO CHANGE	NO CHANGE
TC4_JH584294_random00000006.mm.2	Il11ra2	0.00185479	0.0631082	6.79875	6.83522	0.0364683	0.715218	0.326012	0.211173	-0.114839	0.418843	21.043	7.28341	10.2404	2.30003e-05	24	NO CHANGE	NO CHANGE	NO CHANGE
TC1100002904.mm.2	Usp22	0.00185627	0.00287344	10.1342	9.98756	-0.146607	0.085889	0.317769	0.257879	-0.0598896	0.613657	10.3736	13.1281	2.75449	0.0915879	24	NO CHANGE	NO CHANGE	NO CHANGE
TC0600000447.mm.2	Sval2	0.0018564	0.0262149	3.72875	3.60188	-0.126865	0.318422	0.4996	0.26004	-0.23956	0.187915	20.9265	23.7457	2.81914	0.180801	24	NO CHANGE	NO CHANGE	NO CHANGE
TC0500001596.mm.2	Upk3bl	0.00186003	0.00834176	4.39375	4.33526	-0.0584921	0.578623	0.37687	0.300453	-0.076417	0.607667	6.381	6.93961	0.558611	0.744689	24	NO CHANGE	NO CHANGE	NO CHANGE
TC0200003512.mm.2	Rnd3	0.00186022	0.0594979	9.25083	8.8204	-0.430437	0.000490124	0.407155	0.229427	-0.177727	0.279963	7.90618	8.95364	1.04746	0.629087	24	NO CHANGE	NO CHANGE	DOWN
TC1100003152.mm.2	Cyb5d2	0.00186281	0.0813099	8.36958	8.08105	-0.288532	0.000749099	0.268142	0.152949	-0.115194	0.310363	17.6604	19.2196	1.55925	0.49898	24	NO CHANGE	NO CHANGE	DOWN
TC0200001547.mm.2	Fbxo3	0.00186515	0.116722	12.6029	12.1797	-0.423254	4.42964e-06	0.273314	0.139563	-0.133751	0.249288	18.5567	10.615	-7.94173	0.00222368	24	NO CHANGE	NO CHANGE	DOWN
TC0900001633.mm.2	Fam198a	0.0018672	3.69771e-05	6.35958	6.04157	-0.318016	0.0119108	0.39173	0.69323	0.3015	0.0851918	22.7723	0.954029	2.18173	0.112432	24	NO CHANGE	NO CHANGE	DOWN
TC0500000791.mm.2	Ugt2b35	0.00187106	0.00201796	12.3208	10.9418	-1.37905	1.1456e-16	0.311086	0.414724	0.103638	0.478878	7.1331	7.49858	0.36548	0.816019	24	NO CHANGE	NO CHANGE	DOWN
TC0400002091.mm.2	Mrpl20	0.00187321	0.150642	10.4621	10.6251	0.163056	0.0811206	0.299723	0.144322	-0.155401	0.231421	14.5073	17.5853	3.07799	0.266345	24	NO CHANGE	NO CHANGE	NO CHANGE
TC1000000367.mm.2	Cd164	0.00188005	0.032146	16.5196	16.6658	0.14619	0.0220809	0.199292	0.151473	-0.0478198	0.582193	2.56922	2.36714	-0.202078	0.918832	24	NO CHANGE	NO CHANGE	UP
TC0X00003003.mm.2	Nxf2	0.00188026	0.00787266	3.31167	3.25337	-0.0582937	0.512221	0.330909	0.248289	-0.0826196	0.516065	13.3301	21.7111	8.38094	1.12255e-05	24	NO CHANGE	DELAY	NO CHANGE
TC0100003524.mm.2	Fcgr3	0.00188104	0.00591772	10.2617	11.1676	0.905913	3.65459e-09	0.49687	0.292436	-0.204434	0.235865	17.544	17.1173	-0.426677	0.821172	24	NO CHANGE	NO CHANGE	UP
TC0700002623.mm.2	Pou2f2; Mir6537	0.00188288	0.00479733	3.82292	4.22873	0.405813	8.69831e-05	0.330307	0.289313	-0.0409938	0.754618	5.1244	15.7462	10.6218	1.16463e-07	24	NO CHANGE	DELAY	UP
TC0700001242.mm.2	Olfr297	0.00188944	0.164904	3.33792	3.42355	0.0856349	0.530136	0.384278	0.232762	-0.151516	0.435469	23.2412	23.9964	0.755181	0.771797	24	NO CHANGE	NO CHANGE	NO CHANGE
TC1500001727.mm.2	Ly6i	0.00189263	0.037513	4.7375	5.86946	1.13196	4.65103e-11	0.4339	0.294338	-0.139562	0.441953	16.1064	14.0723	-2.03413	0.322454	24	NO CHANGE	NO CHANGE	UP
TC0500001853.mm.2	B3glct	0.00189484	0.168133	4.36458	4.13262	-0.231964	0.146362	0.383423	0.286879	-0.096544	0.668557	9.45897	9.14734	-0.31163	0.904401	24	NO CHANGE	NO CHANGE	NO CHANGE
TC1000003153.mm.2	Erbb3	0.00189814	7.72633e-05	10.5404	10.0398	-0.500575	0.00451902	0.638569	0.729312	0.0907433	0.699196	3.52523	4.97232	1.4471	0.284403	24	NO CHANGE	NO CHANGE	DOWN
TC0200003174.mm.2	Ubac1	0.00189865	0.00349059	6.37708	6.70554	0.328452	0.00275571	0.417917	0.276371	-0.141546	0.336057	14.4828	13.4221	-1.06067	0.5413	24	NO CHANGE	NO CHANGE	UP
TC0300001850.mm.2	Anxa5	0.00189936	0.370174	12.2292	12.8967	0.66754	5.90042e-07	0.330237	0.121894	-0.208342	0.202343	3.68155	11.9882	8.30666	0.0332546	24	NO CHANGE	NO CHANGE	UP
TC1000002443.mm.2	Pwp2	0.00189975	0.00202657	6.75458	6.48317	-0.271409	0.0196123	0.400651	0.385464	-0.0151876	0.923328	16.0914	17.6679	1.57651	0.314781	24	NO CHANGE	NO CHANGE	DOWN
TC0400001710.mm.2	Usp48	0.00190429	0.130258	10.3229	10.3091	-0.0137698	0.883005	0.298473	0.163811	-0.134661	0.316789	12.5027	9.13438	-3.36831	0.176479	24	NO CHANGE	NO CHANGE	NO CHANGE
TC0200002741.mm.2	Gm14295	0.00190606	0.00104533	10.6146	10.8618	0.247202	0.0246536	0.447081	0.293628	-0.153453	0.307607	15.5397	17.3423	1.8026	0.288751	24	NO CHANGE	NO CHANGE	UP
TC0100000027.mm.2	Pcmtd1	0.00190719	0.00232066	12.4608	12.2652	-0.195635	0.00188396	0.204821	0.212292	0.00747097	0.929444	10.391	8.25151	-2.13949	0.165365	24	NO CHANGE	NO CHANGE	DOWN
TC0400003473.mm.2	Cap1	0.00190875	0.946385	11.8367	12.2816	0.44498	4.63879e-07	0.237539	0.00547978	-0.23206	0.0317974	6.06963	5.51963	-0.550001	0.99182	24	DOWN	NO CHANGE	UP
TC1100000238.mm.2	Xpo1	0.00191434	0.0302491	10.8742	11.2678	0.393671	0.00346379	0.403898	0.325606	-0.078292	0.664866	15.8147	19.0003	3.1856	0.10409	24	NO CHANGE	NO CHANGE	UP
TC1500002098.mm.2	Zcrb1	0.00191562	0.118022	7.82208	7.83639	0.0143056	0.881708	0.324372	0.160417	-0.163955	0.228398	14.136	17.6443	3.50834	0.18235	24	NO CHANGE	NO CHANGE	NO CHANGE
TC1200001118.mm.2	Slc25a47	0.00191695	0.0231448	13.3837	12.9269	-0.456845	0.128869	0.949211	0.808089	-0.141122	0.739492	7.31219	9.50053	2.18833	0.233408	24	NO CHANGE	NO CHANGE	NO CHANGE
TC0700000444.mm.2	Cyp2g1	0.00191841	0.105356	5.25708	6.49623	1.23915	2.51396e-09	0.558876	0.281036	-0.27784	0.231104	8.52852	4.63777	-3.89075	0.134202	24	NO CHANGE	NO CHANGE	UP
TC0500000289.mm.2	Ept1	0.00192343	0.001955	13.5563	13.7	0.14379	0.129944	0.293521	0.366414	0.0728925	0.582351	23.4833	1.11878	1.63547	0.297041	24	NO CHANGE	NO CHANGE	NO CHANGE
TC0200002318.mm.2	Dnmt3b	0.0019239	0.00947094	4.93	4.3722	-0.557798	0.000948859	0.624431	0.378067	-0.246365	0.272947	22.3005	0.804578	2.50407	0.184714	24	NO CHANGE	NO CHANGE	DOWN
TC0700004538.mm.2	Slc25a22	0.00192397	0.458094	11.7958	10.952	-0.843869	0.000300107	0.524537	0.206059	-0.318479	0.302249	4.48373	11.2673	6.78354	0.11585	24	NO CHANGE	NO CHANGE	DOWN
TC1600000526.mm.2	Iqcb1	0.00192527	0.0963303	6.34958	6.16861	-0.180972	0.206124	0.377757	0.298273	-0.079484	0.69222	4.15593	0.868327	-3.2876	0.160915	24	NO CHANGE	NO CHANGE	NO CHANGE
TC1100001321.mm.2	Ptrh2	0.00192621	0.68957	8.79583	8.25048	-0.545357	1.04786e-05	0.334499	0.0484822	-0.286016	0.0668712	15.2676	15.283	0.0154465	0.998627	24	NO CHANGE	NO CHANGE	DOWN
TC0400001736.mm.2	Pla2g2e	0.00192777	0.328955	3.82417	3.74238	-0.0817857	0.344892	0.312308	0.0830307	-0.229277	0.0659161	21.6287	0.582779	2.95409	0.474878	24	NO CHANGE	NO CHANGE	NO CHANGE
TC1400000281.mm.2	Erc2	0.00193578	0.192917	7.47958	7.82226	0.342679	0.00358745	0.475981	0.103033	-0.372949	0.0217503	23.739	18.4675	-5.27152	0.224683	24	DOWN	NO CHANGE	UP
TC1200000652.mm.2	Hif1a	0.00193728	0.018838	11.2279	11.7159	0.487937	1.57898e-08	0.241277	0.185614	-0.0556629	0.579009	9.94287	10.1932	0.25028	0.889205	24	NO CHANGE	NO CHANGE	UP
TC0X00002393.mm.2	BC023829	0.00194124	0.00569604	11.5292	12.6289	1.09974	9.66295e-11	0.451512	0.386257	-0.0652555	0.716519	15.1722	15.6524	0.480203	0.777245	24	NO CHANGE	NO CHANGE	UP
TC1000001110.mm.2	Ikbip	0.00194715	0.685168	6.95083	7.11004	0.159206	0.147618	0.362113	0.0460043	-0.316108	0.0430446	3.5993	5.63435	2.03505	0.827193	24	DOWN	NO CHANGE	NO CHANGE
TC0100002698.mm.2	Trip12	0.00195032	0.0358627	11.3904	11.5581	0.167698	0.00666886	0.151926	0.162698	0.0107721	0.897523	15.0473	12.7131	-2.33421	0.253052	24	NO CHANGE	NO CHANGE	UP
TC1700000044.mm.2	Snx9	0.00195201	0.236781	8.97542	9.23982	0.264405	0.000932626	0.230221	0.0989655	-0.131256	0.212813	8.02074	4.93992	-3.08082	0.339943	24	NO CHANGE	NO CHANGE	UP
TC0100003374.mm.2	Prdx6	0.00195399	0.00683454	12.37	11.3984	-0.971607	4.42173e-13	0.279398	0.329028	0.04963	0.711886	14.5345	10.4282	-4.10635	0.0172508	24	NO CHANGE	ADVANCE	DOWN
TC0700003727.mm.2	Tmem126b	0.00195598	0.192367	9.00125	8.79585	-0.205397	0.0363386	0.319382	0.133269	-0.186112	0.171249	15.3945	18.2701	2.87561	0.342332	24	NO CHANGE	NO CHANGE	DOWN
TC0500003205.mm.2	Tctn1	0.00195846	0.0382242	6.4175	6.31722	-0.100278	0.398891	0.410285	0.269199	-0.141087	0.405479	5.12565	8.70558	3.57993	0.0779598	24	NO CHANGE	NO CHANGE	NO CHANGE
TC0X00001633.mm.2	Adgrg2	0.0019634	0.00879196	4.98375	4.62306	-0.360694	0.0753589	0.701478	0.583343	-0.118135	0.678242	10.6396	10.4262	-0.213438	0.898591	24	NO CHANGE	NO CHANGE	NO CHANGE
TC0900001038.mm.2	Gclc	0.00197066	0.000902791	15.39	13.7082	-1.68177	6.27347e-17	0.442757	0.456544	0.0137862	0.936439	1.60707	5.55366	3.9466	0.0110518	24	NO CHANGE	DELAY	DOWN
TC0800000550.mm.2	Rwdd4a	0.00197196	0.00609493	9.21958	9.53599	0.316409	0.00431107	0.350893	0.33035	-0.0205422	0.889086	15.042	15.5109	0.468901	0.782002	24	NO CHANGE	NO CHANGE	UP
TC0400003568.mm.2	Gjb5	0.00197341	0.0178771	3.44458	3.3823	-0.0622817	0.52309	0.334117	0.249318	-0.0847989	0.53392	1.57837	3.6481	2.06973	0.277697	24	NO CHANGE	NO CHANGE	NO CHANGE
TC0800001400.mm.2	Cmip	0.00197786	0.000851338	10.53	10.561	0.0309921	0.78584	0.410275	0.433629	0.0233542	0.885219	8.4237	12.4539	4.03021	0.0080575	24	NO CHANGE	DELAY	NO CHANGE
TC1600001592.mm.2	Gtf2e1	0.00198472	0.0767543	8.46208	8.22895	-0.233135	0.0684126	0.469157	0.212329	-0.256828	0.1511	16.4283	18.4225	1.99416	0.428287	24	NO CHANGE	NO CHANGE	NO CHANGE
TC0700003854.mm.2	Nup98	0.00198989	0.395188	9.46458	9.78333	0.31875	5.63315e-05	0.241667	0.0643933	-0.177273	0.0859897	6	12.2721	6.2721	0.158232	24	NO CHANGE	NO CHANGE	UP
TC0900003065.mm.2	P4htm	0.00199549	0.00881289	4.50792	4.54119	0.0332738	0.745165	0.356374	0.290815	-0.0655592	0.647451	2.62156	3.10687	0.485308	0.782828	24	NO CHANGE	NO CHANGE	NO CHANGE
TC0400000531.mm.2	Invs	0.00199919	0.00582342	7.04917	6.81839	-0.230774	0.0131341	0.313103	0.272847	-0.0402565	0.74968	17.6915	18.2745	0.582967	0.727785	24	NO CHANGE	NO CHANGE	DOWN
TC0200005373.mm.2	Gm14325	0.00199971	0.00399608	11.975	11.7348	-0.240238	0.0239257	0.415136	0.261424	-0.153712	0.289256	15.0905	16.1392	1.0487	0.564744	24	NO CHANGE	NO CHANGE	DOWN
TC0900000609.mm.2	Ppp2r1b	0.00200242	0.0035711	9.88083	10.0089	0.128095	0.0616207	0.23853	0.213585	-0.0249446	0.791403	3.78638	5.95575	2.16937	0.186021	24	NO CHANGE	NO CHANGE	NO CHANGE
TC0100003604.mm.2	Rgs7	0.00200657	0.596583	4.47667	4.45468	-0.0219841	0.853221	0.410734	0.0636509	-0.347083	0.0428346	2.22833	6.03302	3.80469	0.60638	24	DOWN	NO CHANGE	NO CHANGE
TC1100001770.mm.2	Dcaf7	0.00200671	0.00172033	8.955	8.4306	-0.524405	1.1353e-07	0.276294	0.307524	0.0312301	0.788173	3.74636	6.64462	2.89826	0.0638867	24	NO CHANGE	NO CHANGE	DOWN
TC0900001635.mm.2	Snrk	0.00201644	0.00228292	12.5417	13.4457	0.904008	6.7213e-09	0.487533	0.367833	-0.1197	0.49719	15.3571	18.0796	2.72247	0.10295	24	NO CHANGE	NO CHANGE	UP
TC0500002116.mm.2	Gm21671	0.00201863	0.13844	3.88208	3.81815	-0.0639285	0.686872	0.501883	0.261206	-0.240676	0.281808	1.44883	2.69429	1.24546	0.640797	24	NO CHANGE	NO CHANGE	NO CHANGE
TC0500002281.mm.2	Zbtb49	0.00202071	0.420373	4.6875	4.63952	-0.0479762	0.677684	0.316992	0.109916	-0.207076	0.203656	14.6731	3.33469	-11.3384	0.0124013	24	NO CHANGE	NO CHANGE	NO CHANGE
TC0800001740.mm.2	Rasa3	0.00202562	0.00606843	4.84625	5.12069	0.274444	0.0834445	0.513996	0.509339	-0.00465721	0.983246	8.41574	11.6234	3.20764	0.0545182	24	NO CHANGE	NO CHANGE	NO CHANGE
TC0900001418.mm.2	Slc25a20	0.00202779	0.0153884	12.1562	11.5518	-0.604444	9.21722e-05	0.432561	0.41	-0.0225602	0.909247	17.047	13.3946	-3.65237	0.0484048	24	NO CHANGE	ADVANCE	DOWN
TC0600000985.mm.2	Fam136a	0.00203307	0.30234	8.71833	8.73355	0.0152183	0.874254	0.304974	0.112913	-0.19206	0.167379	16.8151	21.4364	4.62138	0.182756	24	NO CHANGE	NO CHANGE	NO CHANGE
TC1400001402.mm.2	Gm8237	0.00203333	0.305167	3.35583	3.20036	-0.155476	0.232	0.396519	0.15309	-0.243429	0.190183	0.936545	8.52293	7.58638	0.0315405	24	NO CHANGE	NO CHANGE	NO CHANGE
TC1900000903.mm.2	Aip	0.00203503	0.205475	4.95333	5.16669	0.213353	0.0982744	0.461371	0.153766	-0.307605	0.0884534	19.084	16.0941	-2.98985	0.384386	24	NO CHANGE	NO CHANGE	NO CHANGE
TC0400002945.mm.2	Ttc39b	0.00203821	0.0018933	10.0929	10.2821	0.189147	0.0320723	0.334175	0.25898	-0.0751957	0.534752	8.25735	6.40575	-1.8516	0.254487	24	NO CHANGE	NO CHANGE	UP
TC0800002405.mm.2	Mast3	0.00204056	0.287487	5.0225	4.93431	-0.0881944	0.467249	0.400927	0.141387	-0.25954	0.138791	8.90561	10.2927	1.38714	0.685724	24	NO CHANGE	NO CHANGE	NO CHANGE
TC1900000787.mm.2	Tcf7l2	0.00204225	0.163003	11.4283	11.3369	-0.0914286	0.42145	0.429581	0.146088	-0.283493	0.0822739	5.76242	13.0772	7.3148	0.0248576	24	NO CHANGE	NO CHANGE	NO CHANGE
TC0200002850.mm.2	Suv39h2	0.00204243	0.216022	4.26042	4.43222	0.171806	0.16984	0.457854	0.143635	-0.314219	0.0756092	20.1391	17.3897	-2.74941	0.438301	24	NO CHANGE	NO CHANGE	NO CHANGE
TC0200000006.mm.2	Dclre1c	0.00204255	0.0634015	6.44583	5.96905	-0.476786	0.000124427	0.396383	0.224326	-0.172057	0.290048	9.52588	8.72291	-0.802964	0.714952	24	NO CHANGE	NO CHANGE	DOWN
TC1000001894.mm.2	Enpp1	0.00204384	0.000909048	8.97125	9.53925	0.567996	4.39441e-05	0.510235	0.381954	-0.128281	0.474296	11.1124	10.5942	-0.518201	0.737392	24	NO CHANGE	NO CHANGE	UP
TC1800001748.mm.2	Apbb3	0.00204484	0.0242274	6.54833	6.29756	-0.250774	0.0207842	0.350199	0.271579	-0.0786198	0.600707	9.13461	9.23359	0.0989799	0.957281	24	NO CHANGE	NO CHANGE	DOWN
TC0700004108.mm.2	Eif4g2	0.00204751	0.00407922	12.3392	12.6402	0.300992	1.38341e-06	0.20491	0.155789	-0.0491208	0.522089	8.78212	8.66348	-0.118635	0.942293	24	NO CHANGE	NO CHANGE	UP
TC1900000166.mm.2	B3gat3	0.0020506	0.236565	5.4	5.50252	0.10252	0.373119	0.325734	0.159365	-0.166369	0.302692	22.6634	5.01979	6.35635	0.0472791	24	NO CHANGE	NO CHANGE	NO CHANGE
TC1000001618.mm.2	Pmel	0.00205466	0.114867	4.04375	3.85587	-0.187877	0.0943333	0.403103	0.172771	-0.230332	0.147144	2.11627	0.192792	-1.92348	0.470157	24	NO CHANGE	NO CHANGE	NO CHANGE
TC1500002347.mm.2	Parp10	0.00206318	0.136731	8.55125	9.57413	1.02288	8.41454e-11	0.439595	0.171189	-0.268406	0.116815	9.37642	19.4675	10.091	0.000970982	24	NO CHANGE	NO CHANGE	UP
TC1100004156.mm.2	Usp36	0.00206429	0.0730727	6.81083	6.71617	-0.0946627	0.429529	0.393172	0.238098	-0.155074	0.361417	11.1386	12.7727	1.63411	0.468372	24	NO CHANGE	NO CHANGE	NO CHANGE
TC0Y00000193.mm.2	Gm20736	0.00206727	0.0341194	6.25083	5.04857	-1.20226	6.08528e-05	0.877871	0.650452	-0.22742	0.551673	0.766581	1.70906	0.942479	0.637245	24	NO CHANGE	NO CHANGE	DOWN
TC0100001181.mm.2	Elk4	0.00206797	0.0383089	10.0467	10.2593	0.212679	0.0264983	0.342226	0.194358	-0.147868	0.267743	8.11163	11.7167	3.60504	0.0902491	24	NO CHANGE	NO CHANGE	UP
TC1500002181.mm.2	Adcy6	0.00207061	0.13704	7.12625	6.04359	-1.08266	7.7797e-12	0.380165	0.185112	-0.195053	0.232602	8.45742	14.3522	5.89481	0.0337334	24	NO CHANGE	NO CHANGE	DOWN
TC0X00002741.mm.2	Hdac8	0.00207183	0.195962	8.02833	8.19736	0.169028	0.115816	0.417463	0.116014	-0.301449	0.048162	2.81846	6.10298	3.28452	0.375443	24	DOWN	NO CHANGE	NO CHANGE
TC1100001999.mm.2	Gaa	0.00207505	0.0321696	12.9821	12.7541	-0.227956	0.00790314	0.254772	0.210862	-0.0439106	0.70735	5.29266	8.0913	2.79864	0.150288	24	NO CHANGE	NO CHANGE	DOWN
TC1900000116.mm.2	Sf1	0.00207802	0.0933708	11.17	11.4082	0.238194	0.00892393	0.269192	0.170807	-0.0983853	0.428199	6.56528	7.35715	0.791868	0.732594	24	NO CHANGE	NO CHANGE	UP
TC1500001954.mm.2	Cyp2d37-ps	0.00208183	0.0146858	13.0792	12.411	-0.668175	4.63573e-06	0.414913	0.367743	-0.0471703	0.795491	10.8712	8.71665	-2.15459	0.22346	24	NO CHANGE	NO CHANGE	DOWN
TC0200002735.mm.2	2210418O10Rik; Gm17258	0.00208968	0.00097312	11.8	11.6226	-0.177421	0.0901778	0.431669	0.274824	-0.156845	0.279505	16.7383	15.0065	-1.73175	0.318988	24	NO CHANGE	NO CHANGE	NO CHANGE
TC0200005354.mm.2	Gm14296	0.00208968	0.00097312	11.8	11.6226	-0.177421	0.0901778	0.431669	0.274824	-0.156845	0.279504	16.7383	15.0065	-1.73175	0.318989	24	NO CHANGE	NO CHANGE	NO CHANGE
TC0500000298.mm.2	Cenpa	0.00209569	0.0955575	7.43708	7.89492	0.457837	0.000573436	0.369178	0.244933	-0.124245	0.479197	5.97013	7.56494	1.59481	0.490885	24	NO CHANGE	NO CHANGE	UP
TC1300000191.mm.2	Hist1h2bk	0.00209604	0.0194192	5.84417	6.15431	0.310139	0.00835281	0.366314	0.296791	-0.0695234	0.659098	19.2567	15.6007	-3.65605	0.0591163	24	NO CHANGE	NO CHANGE	UP
TC1300002055.mm.2	Lman2	0.00209839	0.268801	9.50417	9.71605	0.211885	0.143723	0.336778	0.200665	-0.136113	0.498345	17.524	17.3446	-0.179385	0.955676	24	NO CHANGE	NO CHANGE	NO CHANGE
TC0800001586.mm.2	Pard3	0.00209891	0.00632025	10.8221	10.2682	-0.553849	6.73203e-07	0.368522	0.246749	-0.121773	0.366949	6.28451	6.91634	0.63183	0.722689	24	NO CHANGE	NO CHANGE	DOWN
TC0700000832.mm.2	Slc17a7	0.00209967	0.245795	2.6725	2.56532	-0.107183	0.225743	0.327274	0.0959467	-0.231327	0.0686046	21.0641	7.60514	10.541	0.0058704	24	NO CHANGE	NO CHANGE	NO CHANGE
TC0200003815.mm.2	Zfp385b	0.00210041	0.0716611	7.17125	6.41294	-0.758313	1.42306e-05	0.5539	0.287295	-0.266605	0.230597	8.69049	11.9005	3.21005	0.169984	24	NO CHANGE	NO CHANGE	DOWN
TC0800003022.mm.2	Mbtps1	0.00211237	0.00761596	9.90583	9.74421	-0.161627	0.0245453	0.2	0.237221	0.0372206	0.70491	6	6.47657	0.476573	0.784407	24	NO CHANGE	NO CHANGE	DOWN
TC1200001921.mm.2	Tmem30b	0.002113	0.00239124	10.6775	9.61187	-1.06563	1.8908e-16	0.244678	0.312356	0.0676783	0.553392	2.71393	6.76878	4.05485	0.0144558	24	NO CHANGE	DELAY	DOWN
TC1400002847.mm.2	Gm3667	0.00211333	0.157268	4.09208	4.1247	0.0326188	0.886015	0.688551	0.365538	-0.323013	0.312851	0.92909	3.7055	2.77641	0.316865	24	NO CHANGE	NO CHANGE	NO CHANGE
TC0600001536.mm.2	Gabarapl1	0.00211358	0.00143867	12.4288	11.6976	-0.731171	0.000702902	0.754736	0.664411	-0.0903249	0.750314	4.22366	6.88674	2.66309	0.0895523	24	NO CHANGE	NO CHANGE	DOWN
TC0200000391.mm.2	Zmynd19	0.00211754	0.0690003	6.45417	6.3976	-0.0565675	0.638596	0.38634	0.250272	-0.136068	0.428106	16.136	12.046	-4.08995	0.066229	24	NO CHANGE	NO CHANGE	NO CHANGE
TC0900000982.mm.2	Pygo1	0.00211804	0.336793	3.81042	3.49224	-0.318175	0.00075751	0.297288	0.0866564	-0.210631	0.0924037	23.0037	3.48859	4.48491	0.284351	24	NO CHANGE	NO CHANGE	DOWN
TC1000002783.mm.2	Lrriq1	0.00211961	0.403406	3.15458	3.02141	-0.133175	0.170164	0.306648	0.086252	-0.220396	0.10626	22.7968	15.2151	-7.58174	0.10081	24	NO CHANGE	NO CHANGE	NO CHANGE
TC0600003316.mm.2	Gsg1	0.00212106	0.0311287	3.01417	2.88552	-0.128651	0.133405	0.306982	0.181643	-0.125339	0.293435	3.33826	5.35588	2.01762	0.340235	24	NO CHANGE	NO CHANGE	NO CHANGE
TC0900000412.mm.2	Vwa5a	0.00212433	0.0650181	8.1825	8.54847	0.365972	0.00195677	0.341081	0.238914	-0.102167	0.515514	8.40203	6.29645	-2.10559	0.339655	24	NO CHANGE	NO CHANGE	UP
TC0Y00000161.mm.2	Sly	0.00212862	0.0467011	5.53833	5.19718	-0.341151	0.171216	0.797687	0.556043	-0.241644	0.489449	2.14864	0.980359	-1.16828	0.573554	24	NO CHANGE	NO CHANGE	NO CHANGE
TC0300000396.mm.2	Proser1	0.0021326	0.641837	8.08125	8.29562	0.214365	0.0294476	0.353291	0.041049	-0.312242	0.0243973	8.90029	13.9645	5.06425	0.580781	24	DOWN	NO CHANGE	UP
TC1300000396.mm.2	Prpf4b	0.00213315	0.359345	9.76458	9.69488	-0.0697024	0.384496	0.225066	0.088291	-0.136775	0.232457	15.4822	11.8867	-3.59552	0.333688	24	NO CHANGE	NO CHANGE	NO CHANGE
TC1900001360.mm.2	Dkk1	0.00213425	0.236009	3.52875	3.54256	0.0138095	0.862714	0.285672	0.0919725	-0.193699	0.0889682	23.6317	2.78042	3.14869	0.380626	24	NO CHANGE	NO CHANGE	NO CHANGE
TC1700001856.mm.2	Cyp4f14	0.00213602	0.0197376	15.5712	14.6616	-0.909603	6.09989e-15	0.235524	0.218443	-0.0170805	0.87584	20.6245	20.8071	0.182637	0.919593	24	NO CHANGE	NO CHANGE	DOWN
TC0200003933.mm.2	Olfr1057	0.0021386	0.156654	3.115	3.08302	-0.0319841	0.754444	0.364307	0.14176	-0.222546	0.124698	21.8941	3.74739	5.85334	0.0594721	24	NO CHANGE	NO CHANGE	NO CHANGE
TC0700002539.mm.2	Vmn1r127	0.00214135	0.109332	4.28375	4.06325	-0.220496	0.265158	0.665774	0.328339	-0.337435	0.22356	2.40237	3.24068	0.838306	0.748071	24	NO CHANGE	NO CHANGE	NO CHANGE
TC1100000617.mm.2	P4ha2	0.00214444	0.00345228	6.04125	6.08917	0.0479167	0.71691	0.436731	0.446431	0.00969991	0.958093	15.2332	16.3499	1.11666	0.495374	24	NO CHANGE	NO CHANGE	NO CHANGE
TC0100003320.mm.2	Tor3a	0.00214946	0.00460617	7.07083	7.65938	0.588552	0.00107043	0.554586	0.558137	0.00355148	0.988055	21.9851	18.5527	-3.43234	0.0410846	24	NO CHANGE	ADVANCE	UP
TC0300002932.mm.2	Egf	0.00215198	0.00887165	3.03667	3.13964	0.102976	0.232762	0.29918	0.24927	-0.0499108	0.683281	17.5475	21.0616	3.51419	0.0425453	24	NO CHANGE	DELAY	NO CHANGE
TC0800000979.mm.2	Fbxw9	0.00215265	0.085967	9.74083	9.88946	0.148631	0.259952	0.468377	0.221893	-0.246484	0.183013	16.3676	16.6518	0.284207	0.911465	24	NO CHANGE	NO CHANGE	NO CHANGE
TC1400002099.mm.2	Rabggta	0.0021584	0.00741075	9.99708	9.78917	-0.207917	0.00616517	0.23999	0.229003	-0.0109868	0.915432	15.0827	20.9766	5.89394	0.000883915	24	NO CHANGE	DELAY	DOWN
TC0800001833.mm.2	Gm15056	0.00215871	0.0657052	4.03333	3.70349	-0.329841	0.00846463	0.470799	0.197057	-0.273742	0.115618	5.77737	8.9517	3.17433	0.208396	24	NO CHANGE	NO CHANGE	DOWN
TC1200000967.mm.2	Spata7	0.00217628	0.700002	4.7475	4.78635	0.0388492	0.748266	0.380996	0.0518198	-0.329176	0.0610607	17.5139	12.1302	-5.38374	0.551024	24	NO CHANGE	NO CHANGE	NO CHANGE
TC1100003450.mm.2	Vmp1; Mir21a	0.00218013	0.00127997	12.3554	12.1402	-0.215218	0.0098827	0.335722	0.206462	-0.12926	0.255064	23.8909	1.75314	1.86219	0.292877	24	NO CHANGE	NO CHANGE	DOWN
TC0700000458.mm.2	Blvrb	0.0021805	0.0104461	11.9904	10.0711	-1.91931	1.74523e-18	0.425571	0.359966	-0.0656056	0.711617	17.2172	15.2043	-2.01293	0.263517	24	NO CHANGE	NO CHANGE	DOWN
TC1400002227.mm.2	4930578I06Rik	0.00218346	0.105986	3.25667	3.10222	-0.154444	0.116271	0.349685	0.154571	-0.195114	0.158656	2.46627	1.27637	-1.1899	0.653112	24	NO CHANGE	NO CHANGE	NO CHANGE
TC1000001260.mm.2	Lin7a	0.00218406	0.0747367	9.00417	9.52365	0.519484	0.00023625	0.474742	0.221278	-0.253464	0.167088	14.0987	16.2413	2.14256	0.400005	24	NO CHANGE	NO CHANGE	UP
TC1400001047.mm.2	Esd	0.00218914	0.0432745	14.3879	13.4607	-0.927242	5.29338e-16	0.207007	0.184507	-0.0225006	0.828093	17.0033	9.94024	-7.06305	0.00089966	24	NO CHANGE	ADVANCE	DOWN
TC1500002053.mm.2	Odf3b	0.00219202	0.245651	7.505	5.21389	-2.29111	1.75912e-17	0.462037	0.226244	-0.235792	0.308744	0.861558	23.878	-0.983513	0.745665	24	NO CHANGE	NO CHANGE	DOWN
TC1500000175.mm.2	Ank; Mir7117	0.00219724	0.003302	7.68917	7.72774	0.0385715	0.743186	0.427058	0.376045	-0.0510133	0.76183	10.5049	10.5591	0.0541693	0.972556	24	NO CHANGE	NO CHANGE	NO CHANGE
TC1900000685.mm.2	Gbf1	0.00220424	0.601614	11.755	11.8311	0.0760913	0.381064	0.30315	0.0445488	-0.258601	0.0386098	23.937	1.71393	1.77693	0.816076	24	DOWN	NO CHANGE	NO CHANGE
TC0200004164.mm.2	Accs	0.00221438	0.0158035	5.12583	4.8397	-0.286131	0.111338	0.683182	0.388803	-0.29438	0.238955	2.80901	2.76887	-0.0401399	0.984296	24	NO CHANGE	NO CHANGE	NO CHANGE
TC0600000340.mm.2	Tmem140	0.00222266	0.0867972	8.21333	8.12407	-0.0892659	0.546271	0.520008	0.253263	-0.266745	0.201069	2.02121	3.18614	1.16493	0.646379	24	NO CHANGE	NO CHANGE	NO CHANGE
TC0300000433.mm.2	Mab21l1	0.00222353	0.222748	3.06875	3.0346	-0.0341468	0.690555	0.271682	0.113729	-0.157953	0.19235	14.7351	4.81654	-9.91855	0.00332505	24	NO CHANGE	NO CHANGE	NO CHANGE
TC1300002457.mm.2	Aggf1	0.00222443	0.119588	9.36667	9.26446	-0.102202	0.215201	0.239897	0.154106	-0.0857909	0.464128	18.1954	22.5204	4.32493	0.0747479	24	NO CHANGE	NO CHANGE	NO CHANGE
TC1800001444.mm.2	Spink13	0.00222543	0.183661	2.9575	2.69262	-0.264881	0.0124211	0.363137	0.132804	-0.230333	0.113078	23.6445	17.7983	-5.84622	0.0720516	24	NO CHANGE	NO CHANGE	DOWN
TC0800000146.mm.2	Cln8	0.00222673	0.000202617	7.62333	7.46472	-0.158611	0.170947	0.329575	0.59708	0.267505	0.104319	7.1726	12.9159	5.74333	0.000422747	24	NO CHANGE	DELAY	NO CHANGE
TC0100002936.mm.2	Tsn	0.00222848	0.0635647	9.43875	9.28611	-0.152639	0.105171	0.324488	0.182213	-0.142275	0.286443	15.7988	22.5159	6.71704	0.003823	24	NO CHANGE	NO CHANGE	NO CHANGE
TC0900000719.mm.2	Ubl7	0.00223463	0.112407	10.5088	10.9179	0.409167	0.0212851	0.648749	0.246104	-0.402645	0.0993784	5.61266	3.96766	-1.645	0.575928	24	NO CHANGE	NO CHANGE	UP
TC0200004521.mm.2	Myef2; Gm9833	0.00223529	0.384357	8.66458	8.22692	-0.437659	3.48668e-05	0.303014	0.0883484	-0.214665	0.111204	0.691839	4.90488	4.21304	0.340016	24	NO CHANGE	NO CHANGE	DOWN
TC0200002184.mm.2	Pax1	0.00223867	0.00291988	2.36208	2.37937	0.0172817	0.823018	0.267944	0.263238	-0.00470528	0.965934	23.3554	23.4144	0.0589786	0.969799	24	NO CHANGE	NO CHANGE	NO CHANGE
TC0400002460.mm.2	Ubap2	0.00223934	0.000446885	8.85625	9.26808	0.411825	0.000470531	0.402996	0.410964	0.00796828	0.958491	12.6228	14.224	1.60124	0.275195	24	NO CHANGE	NO CHANGE	UP
TC0700001463.mm.2	Olfr555	0.002248	0.0309758	2.7475	2.68038	-0.067123	0.570639	0.396677	0.281111	-0.115567	0.490853	1.34354	19.1952	-6.14831	0.00315301	24	NO CHANGE	ADVANCE	NO CHANGE
TC1500000072.mm.2	Ugt3a1	0.00225184	0.315175	14.1829	9.60175	-4.58117	1.14229e-26	0.393492	0.243075	-0.150417	0.561693	21.1667	7.97911	10.8124	0.00231881	24	NO CHANGE	NO CHANGE	DOWN
TC1300002619.mm.2	Kif2a	0.00225242	0.131915	7.82708	7.53562	-0.291468	0.00139682	0.18964	0.171805	-0.0178347	0.882993	17.3721	19.2492	1.8771	0.465756	24	NO CHANGE	NO CHANGE	DOWN
TC0700001098.mm.2	Klhl25	0.00225413	0.0181333	7.13292	8.12498	0.992063	5.14286e-09	0.442583	0.358522	-0.0840612	0.65799	15.5495	16.5834	1.03393	0.584771	24	NO CHANGE	NO CHANGE	UP
TC0800002597.mm.2	Junb	0.00225684	0.471552	4.99	4.72032	-0.269683	0.153743	0.753231	0.104591	-0.648639	0.017343	4.57264	6.45541	1.88276	0.788159	24	DOWN	NO CHANGE	NO CHANGE
TC0700000374.mm.2	Zfp108	0.00226141	0.721782	7.62208	7.46794	-0.154147	0.0767242	0.269455	0.0326181	-0.236837	0.0528815	18.2765	4.88146	10.605	0.310509	24	NO CHANGE	NO CHANGE	NO CHANGE
TC0900001850.mm.2	Eif3g	0.00226761	0.00921613	8.79625	8.61667	-0.179583	0.115942	0.326309	0.364353	0.0380431	0.809517	13.3549	14.5313	1.17643	0.509499	24	NO CHANGE	NO CHANGE	NO CHANGE
TC0800002400.mm.2	Pgpep1	0.00226993	0.000306252	8.81	8.50742	-0.302579	0.00647647	0.364151	0.456595	0.0924435	0.536468	18.3639	18.023	-0.340914	0.811137	24	NO CHANGE	NO CHANGE	DOWN
TC0400000354.mm.2	Nfx1	0.00228204	8.47621e-06	9.73833	9.53629	-0.202044	0.0592323	0.366999	0.60027	0.233271	0.119119	7.34191	6.18792	-1.15399	0.367657	24	NO CHANGE	NO CHANGE	NO CHANGE
TC0100000893.mm.2	Espnl	0.0022917	0.410865	5.42875	5.5627	0.133948	0.271323	0.392813	0.107909	-0.284904	0.102895	23.3321	0.0962303	0.764127	0.863302	24	NO CHANGE	NO CHANGE	NO CHANGE
TC0900003276.mm.2	Cyp8b1	0.00231626	0.000328337	13.6188	13.1958	-0.422976	0.0865086	0.857698	0.998334	0.140636	0.680385	21.8553	1.80426	3.94892	0.00803807	24	NO CHANGE	DELAY	NO CHANGE
TC0700001356.mm.2	Rsf1	0.00231652	0.499033	8.6275	8.75687	0.129365	0.196092	0.366294	0.0610788	-0.305216	0.0332007	7.08311	13.8861	6.80296	0.291898	24	DOWN	NO CHANGE	NO CHANGE
TC1300001190.mm.2	Dimt1	0.00232403	0.00745768	8.12958	8.43714	0.30756	0.00232526	0.265213	0.325289	0.0600753	0.653288	15.0851	17.3713	2.28615	0.203256	24	NO CHANGE	NO CHANGE	UP
TC0X00002706.mm.2	Pdzd11	0.00232511	0.151802	8.19208	8.22893	0.0368452	0.653035	0.305458	0.108068	-0.19739	0.092749	17.9368	13.5507	-4.38608	0.16407	24	NO CHANGE	NO CHANGE	NO CHANGE
TC0Y00000254.mm.2	Gm20825	0.00232638	0.00327159	4.37792	4.39542	0.0175	0.860194	0.359787	0.304502	-0.0552847	0.691949	2.46855	2.38995	-0.078595	0.962016	24	NO CHANGE	NO CHANGE	NO CHANGE
TC0400000725.mm.2	Atp6v1g1	0.00232732	0.485251	8.60083	8.92546	0.324623	0.0135904	0.290273	0.113267	-0.177006	0.325234	16.8627	1.21332	8.35067	0.0771121	24	NO CHANGE	NO CHANGE	UP
TC1500001777.mm.2	Dgat1	0.0023303	0.068477	6.36833	6.30942	-0.0589087	0.583018	0.336366	0.221989	-0.114378	0.450888	11.1653	13.3211	2.15579	0.335185	24	NO CHANGE	NO CHANGE	NO CHANGE
TC0700001372.mm.2	Prkrir	0.00233111	0.00154566	7.63708	7.62403	-0.0130556	0.886168	0.313861	0.331674	0.0178123	0.890185	15.1044	12.9536	-2.15083	0.163855	24	NO CHANGE	NO CHANGE	NO CHANGE
TC1000000399.mm.2	Bend3	0.00233534	0.617496	5.91708	6.06121	0.144127	0.231623	0.336641	0.0685945	-0.268046	0.11385	5.04849	15.8796	10.8311	0.127604	24	NO CHANGE	NO CHANGE	NO CHANGE
TC1500001365.mm.2	Cox6c	0.00233931	0.118209	16.9904	17.0739	0.0834524	0.178698	0.207007	0.102686	-0.104322	0.236104	19.3744	20.0044	0.629979	0.804354	24	NO CHANGE	NO CHANGE	NO CHANGE
TC0100000911.mm.2	Olfr1410	0.0023411	0.154091	5.53	5.36012	-0.169881	0.131452	0.377757	0.167717	-0.210041	0.189101	1.47292	23.6266	-1.84631	0.503665	24	NO CHANGE	NO CHANGE	NO CHANGE
TC0100000351.mm.2	Wdr75	0.00234338	0.0366356	8.47792	8.52911	0.0511905	0.614878	0.382655	0.195095	-0.18756	0.191431	15.6501	15.3997	-0.250455	0.912777	24	NO CHANGE	NO CHANGE	NO CHANGE
TC0600000182.mm.2	Cped1	0.00234546	5.13851e-06	11.6129	12.6963	1.08333	3.09464e-16	0.309625	0.463431	0.153807	0.19833	10.4014	7.91757	-2.48381	0.0479007	24	NO CHANGE	ADVANCE	UP
TC0100000775.mm.2	4933407L21Rik	0.00234731	0.319398	3.98917	3.97117	-0.017996	0.880067	0.345444	0.140123	-0.205321	0.229689	23.6817	19.7705	-3.91119	0.268744	24	NO CHANGE	NO CHANGE	NO CHANGE
TC0400002084.mm.2	Ssu72	0.0023491	0.616168	10.9537	10.69	-0.26375	0.00267736	0.233778	0.0500833	-0.183695	0.127296	6.68763	9.77964	3.09201	0.6295	24	NO CHANGE	NO CHANGE	DOWN
TC1300002270.mm.2	Adcy2	0.00234983	0.225217	3.535	3.51579	-0.0192063	0.883967	0.400433	0.185029	-0.215404	0.254967	18.0344	20.63	2.59551	0.384655	24	NO CHANGE	NO CHANGE	NO CHANGE
TC0500003619.mm.2	Lnx2	0.00235891	7.55439e-05	10.5796	10.5346	-0.0450198	0.753096	0.571856	0.560906	-0.0109506	0.957266	21.1938	21.087	-0.106788	0.936966	24	NO CHANGE	NO CHANGE	NO CHANGE
TC1900000568.mm.2	Cyp2c50	0.00236255	0.271381	17.3683	16.2889	-1.0794	4.08615e-08	0.272687	0.244259	-0.0284277	0.900669	18.4458	18.4346	-0.0112146	0.997375	24	NO CHANGE	NO CHANGE	DOWN
TC0900001022.mm.2	Hmgcll1	0.00236362	0.334585	4.45417	4.56911	0.11494	0.389315	0.460535	0.131905	-0.328629	0.0892864	22.2456	22.736	0.490414	0.901527	24	NO CHANGE	NO CHANGE	NO CHANGE
TC1800000394.mm.2	0610009O20Rik	0.0023643	0.53677	7.35333	7.48958	0.13625	0.283614	0.382536	0.0890497	-0.293487	0.108065	7.25471	23.6958	-7.55886	0.177086	24	NO CHANGE	NO CHANGE	NO CHANGE
TC0300001576.mm.2	Zranb2	0.00236884	0.00115592	8.88292	8.50371	-0.379206	0.000180744	0.280967	0.381774	0.100807	0.439397	18.4326	14.623	-3.80958	0.0189165	24	NO CHANGE	ADVANCE	DOWN
TC0800002508.mm.2	Pou4f2	0.00237419	0.00144884	3.03875	2.9627	-0.0760516	0.299486	0.215602	0.302031	0.0864299	0.403238	22.6034	1.02682	2.42338	0.130275	24	NO CHANGE	NO CHANGE	NO CHANGE
TC0500002940.mm.2	Tmed5	0.00237768	0.00167577	10.5879	10.0926	-0.495298	2.68454e-05	0.329524	0.419824	0.0902999	0.548539	9.49661	11.6823	2.18566	0.160955	24	NO CHANGE	NO CHANGE	DOWN
TC0300000958.mm.2	Pdzk1	0.00237992	0.0043756	8.78708	8.7473	-0.0397817	0.637936	0.271639	0.292975	0.0213363	0.859776	15.8241	9.69859	-6.12555	0.000404332	24	NO CHANGE	ADVANCE	NO CHANGE
TC0700000401.mm.2	Rps19	0.00239045	0.120302	8.745	8.54796	-0.197044	0.158165	0.497896	0.208562	-0.289334	0.143181	14.7975	13.0122	-1.78531	0.518956	24	NO CHANGE	NO CHANGE	NO CHANGE
[truncated: 2,912 more rows]

## Sheet: Sheet 2
Category	Term_1	Term	Count	%	PValue	Genes	List.Total	Pop.Hits	Pop.Total
GOTERM_BP_DIRECT	GO:0006629	lipid metabolic process	70	5.71429	5.75e-13	RAB7, PCSK9, MSMO1, GBA2, AACS, FADS3, FADS2, NSDHL, LIPG, PLCE1, SULT4A1, ELOVL1, GPX1, DGAT2, ELOVL5, ELOVL2, ACOT12, ELOVL6, ACSL4, GPCPD1, BAAT, LSS, PLA2G15, CYP39A1, PLA2G16, SULT1D1, NAAA, ANGPTL3, MGLL, PLPP1, PLA1A, PPARD, MTMR1, SGMS1, INSIG2, AKR1D1, MTTP, LPL, HMGCR, HSD17B7, ACNAT2, AGPAT1, ADIPOR1, PLD1, ACNAT1, AGPAT2, CYP7A1, ACACB, ACACA, PTDSS1, EBP, PSAP, HSD17B2, SCAP, DECR2, …	1067	459	18082
GOTERM_BP_DIRECT	GO:0035458	cellular response to interferon-beta	16	1.30612	4.87e-09	GBP6, NDUFA13, PNPT1, TGTP1, STAT1, IFI203, IRGM2, IRGM1, IFI47, IFIT1, IFIT3, GM12185, IRF1, IGTP, GM4841, TLR3	1067	41	18082
GOTERM_BP_DIRECT	GO:0006810	transport	166	13.551	8.61e-09	SLC23A2, SLC35B4, SLC35B1, PITPNB, HBB-B2, GOLIM4, PKD2L2, ERO1L, TXN2, FADS3, FADS2, RINL, SLC16A6, AKT1, SLC16A9, SLC25A45, SLC25A44, AP2M1, AGFG1, SLC16A5, SLC34A2, ABCG8, ABCG5, ATP6V1G1, SLC35C1, SPNS2, SLC6A12, ATP1B3, ATP1B1, THOC7, TOM1L2, DDX39B, HGS, STIM2, RAB34, SLC9A8, VDAC2, SLC25A51, ND1, NUP98, TTPAL, ND3, ATP6V0D2, KPNB1, TSG101, SLC26A1, TMED10, SLC45A3, UQCRB, SAR1B, ABCB4, MTT…	1067	1822	18082
GOTERM_BP_DIRECT	GO:0045071	negative regulation of viral genome replication	14	1.14286	1.17e-08	IFITM1, APOBEC3, RSAD2, MX2, EIF2AK2, ADAR, ISG15, SRPK1, ISG20, PARP10, MAVS, OAS3, CCL5, OASL1	1067	32	18082
GOTERM_BP_DIRECT	GO:0051607	defense response to virus	30	2.44898	1.45e-07	SLFN8, IFITM1, ADAR, DDX60, IFIT1, LYST, IFIT3, TBK1, DHX58, OASL1, APOBEC1, APOBEC3, RSAD2, DDX58, MX2, STAT2, EIF2AK2, ISG15, DICER1, IFIT1BL2, ISG20, CXCL10, MAVS, POLR3B, OAS3, IRF1, IFIT3B, TLR7, SERINC3, TLR3	1067	167	18082
GOTERM_BP_DIRECT	GO:0016126	sterol biosynthetic process	10	0.816327	1.48e-05	SQLE, NSDHL, EBP, INSIG2, DHCR24, MSMO1, DHCR7, HMGCR, LBR, CYP51	1067	27	18082
GOTERM_BP_DIRECT	GO:0006103	2-oxoglutarate metabolic process	8	0.653061	4.34e-05	STAT5A, STAT5B, GOT1, IDH1, TAT, GPT2, OGDH, IDH3A	1067	18	18082
GOTERM_BP_DIRECT	GO:0042632	cholesterol homeostasis	14	1.14286	6.41e-05	ABCG8, ABCG5, DGAT2, NR1H2, MTTP, LRP5, APOC3, PCSK9, LPL, TMEM97, CYP7A1, LIPG, ANGPTL3, LDLR	1067	63	18082
GOTERM_BP_DIRECT	GO:0008202	steroid metabolic process	16	1.30612	0.000105	INSIG2, MTTP, AKR1D1, PCSK9, DHCR24, MSMO1, HMGCR, CYP7A1, CYP51, CYP39A1, NSDHL, EBP, SCAP, DHCR7, LDLR, SULT4A1	1067	84	18082
GOTERM_BP_DIRECT	GO:0000183	chromatin silencing at rDNA	12	0.979592	0.000309	TAF1D, HIST1H4A, ZNRD1, HIST1H4K, POLR1A, HIST1H4M, HIST1H4N, UBTF, POLR1E, HIST1H4J, HIST1H3I, HIST1H4D	1067	55	18082
GOTERM_BP_DIRECT	GO:0002376	immune system process	41	3.34694	0.000325	IFITM1, CSF1, ADAR, AHR, TAPBPL, IFIT1, IFIT3, LGALS3, TBK1, DHX58, LGALS9, CD300LG, OASL1, HERC6, LYN, APOBEC3, CR2, RSAD2, RIPK2, DDX58, PRKCB, MX2, ERAP1, IRGM1, EIF2AK2, PSMB9, ISG20, MAVS, POLR3B, TRAF3, CR1L, OAS3, TOLLIP, IRF1, TLR7, MASP1, SERINC3, TLR4, TLR3, CFB, LGR4	1067	383	18082
GOTERM_BP_DIRECT	GO:0001525	angiogenesis	29	2.36735	0.000412	NRP2, ROBO4, SETD2, TNFAIP2, PRKX, TSPAN12, HIF1A, HS6ST1, RTN4, CTGF, EFNB2, MYDGF, RNF213, SRPX2, LEPR, GDF2, FN1, FZD8, PRKCA, DICER1, ADRA2B, SMAD5, VAV2, MEIS1, PTPRB, FAP, ANGPTL3, MMP19, TGFBI	1067	239	18082
GOTERM_BP_DIRECT	GO:0045815	positive regulation of gene expression, epigenetic	9	0.734694	0.000526	HIST1H4A, HIST1H4K, CBX3, HIST1H4M, HIST1H4N, SLC50A1, HIST1H4J, HIST1H3I, HIST1H4D	1067	33	18082
GOTERM_BP_DIRECT	GO:0050921	positive regulation of chemotaxis	6	0.489796	0.0012881	TGFB1, RARRES2, FN1, GM2023, CCL19, STX4A	1067	15	18082
GOTERM_BP_DIRECT	GO:0006636	unsaturated fatty acid biosynthetic process	6	0.489796	0.0012881	ELOVL1, FADS2, ELOVL5, ELOVL2, ELOVL6, DECR2	1067	15	18082
GOTERM_BP_DIRECT	GO:0051290	protein heterotetramerization	10	0.816327	0.00148762	RRM1, HIST1H4A, RRM2, HIST1H4K, HIST1H4M, HIST1H4N, PDSS1, HIST1H4J, HIST1H3I, HIST1H4D	1067	47	18082
GOTERM_BP_DIRECT	GO:0043066	negative regulation of apoptotic process	52	4.2449	0.00170521	CDKN1A, SLC40A1, ADAR, A430089I19RIK, IFIT3, MYDGF, LGALS3, CCND2, MAEA, RB1CC1, NUP62, AKT1, CD38, PIM3, NOS1, YWHAH, GPX1, TSC22D1, DAPK1, DUSP1, DAD1, PPIF, GAS1, SGK1, ATF5, CD44, PPARD, PIK3R1, HMGCR, HIF1A, FOXO1, SLC25A27, ERBB4, FIGNL1, APBB2, AAMDC, STAT5A, STAT5B, STIL, FN1, EIF2AK2, DHCR24, IGF1, DNAJA1, SON, NR4A3, KITL, NDUFAF4, BCL3, ERCC5, CIAPIN1, LIMS2	1067	566	18082
GOTERM_BP_DIRECT	GO:0043552	positive regulation of phosphatidylinositol 3-kinase activity	8	0.653061	0.00183023	SH3GLB1, LYN, TGFB1, ERBB4, IRS1, GM2023, CCL19, VAV2	1067	31	18082
GOTERM_BP_DIRECT	GO:0006897	endocytosis	22	1.79592	0.00232363	CSNK1G3, HIP1, SORT1, TNK2, LRP5, SNX10, AP2A2, DNM2, EPN2, CLCN5, RINL, SNX2, RAB34, AP2S1, SNX9, DNM1L, LDLR, LRP12, CSNK1G2, SNX5, AP2M1, PICALM	1067	181	18082
GOTERM_BP_DIRECT	GO:0045653	negative regulation of megakaryocyte differentiation	6	0.489796	0.00240486	HIST1H4A, HIST1H4K, HIST1H4M, HIST1H4N, HIST1H4J, HIST1H4D	1067	17	18082
GOTERM_BP_DIRECT	GO:0007252	I-kappaB phosphorylation	5	0.408163	0.00405819	CHUK, TLR7, ERC1, TLR4, TLR3	1067	12	18082
GOTERM_BP_DIRECT	GO:0006468	protein phosphorylation	50	4.08163	0.00638259	TBK1, CCND1, FASTK, TRIM24, AKT1, PIM3, PRKACB, SCYL1, JAK1, EIF2A, CSNK1G3, CHUK, DAPK1, RIPK2, PRKCB, HUS1, DYRK1B, PRKCA, TYK2, TGFBR2, LATS1, MAPKAPK3, CCNE1, SIK1, ULK1, TNIK, SGK1, CSNK1G2, NPR2, PRKX, PIK3R1, ERBB4, MKNK1, STK38L, MAPK6, ST3GAL1, LYN, NTRK2, TGFB1, PLK5, TNK2, EIF2AK2, SMAD9, MERTK, SMAD5, SRPK1, SNRK, SBK1, PTPRA, MAP3K13	1067	576	18082
GOTERM_BP_DIRECT	GO:0048661	positive regulation of smooth muscle cell proliferation	12	0.979592	0.00709398	STAT5B, EGR1, NR4A3, STAT1, CCL5, NAMPT, AKT1, PRKCA, IGF1, HMGCR, HIF1A, TGFBR2	1067	80	18082
GOTERM_BP_DIRECT	GO:0006641	triglyceride metabolic process	8	0.653061	0.0071046	APOBEC1, GPX1, INSIG2, MTTP, ANGPTL3, APOC3, PCSK9, ACSL4	1067	39	18082
GOTERM_BP_DIRECT	GO:0071479	cellular response to ionizing radiation	7	0.571429	0.00855653	CDKN1A, RAD51, TGFB1, GADD45A, FIGNL1, HUS1, INO80	1067	31	18082
GOTERM_BP_DIRECT	GO:0015986	ATP synthesis coupled proton transport	6	0.489796	0.00974565	ATP5D, ATP5K, TCIRG1, ATP5H, ATP5O, ATP5G1	1067	23	18082
GOTERM_BP_DIRECT	GO:0042157	lipoprotein metabolic process	7	0.571429	0.0100176	APOBEC1, APOL9B, APOL9A, MTTP, APOC3, PCSK9, LDLR	1067	32	18082
GOTERM_BP_DIRECT	GO:0032776	DNA methylation on cytosine	7	0.571429	0.0100176	HIST1H4A, HIST1H4K, HIST1H4M, HIST1H4N, HIST1H4J, HIST1H3I, HIST1H4D	1067	32	18082
GOTERM_BP_DIRECT	GO:0016050	vesicle organization	6	0.489796	0.0117251	SNX2, SORT1, SNX9, SNX10, WASL, SNX5	1067	24	18082
GOTERM_BP_DIRECT	GO:0007259	JAK-STAT cascade	6	0.489796	0.0117251	STAT5A, STAT5B, IL15RA, STAT1, HAMP, PRLR	1067	24	18082
GOTERM_BP_DIRECT	GO:0007030	Golgi organization	11	0.897959	0.0173823	ARFGEF1, RAB43, ARHGAP21, ATP8B4, TMED10, NPLOC4, CLTC, ATL2, ARL1, PLEKHM2, SYNE1	1067	79	18082
GOTERM_BP_DIRECT	GO:0008643	carbohydrate transport	7	0.571429	0.0200377	SLC35B4, SLC35B1, SLC35C1, SLC2A1, AKT1, SLC50A1, SLC37A3	1067	37	18082
GOTERM_BP_DIRECT	GO:0046627	negative regulation of insulin receptor signaling pathway	7	0.571429	0.0200377	PID1, GRB14, AHSG, PRKCB, IRS1, ENPP1, PRKCA	1067	37	18082
GOTERM_BP_DIRECT	GO:0007155	cell adhesion	41	3.34694	0.0204692	NLGN2, TENM3, PRKX, LAMC1, LPP, HAPLN1, PCDH17, CTGF, EFNB2, CDH5, SRPX2, MAEA, ADGRE5, CDH1, ADAM23, NPTN, ITGB7, CD164, TOR1A, VCAM1, DST, ITGA1, FN1, SORBS2, PRKCA, NPNT, ATP1B1, KLRA9, RHOA, IGSF11, LRFN3, MFAP4, FAP, KITL, COL4A3, NINJ1, ANGPTL3, CD47, TGFBI, AJUBA, CD44	1067	485	18082
GOTERM_BP_DIRECT	GO:0006749	glutathione metabolic process	8	0.653061	0.0238949	GSTK1, GPX1, TXNRD3, IDH1, G6PDX, GSTT3, GSTT1, MMACHC	1067	49	18082
GOTERM_BP_DIRECT	GO:0018105	peptidyl-serine phosphorylation	15	1.22449	0.0251694	CSNK1G3, PRKCB, PRKX, PRKCA, TGFBR2, LATS1, TBK1, SBK1, MAPKAPK3, MKNK1, AKT1, STK38L, ULK1, SGK1, CSNK1G2	1067	133	18082
GOTERM_BP_DIRECT	GO:0006979	response to oxidative stress	15	1.22449	0.0251694	SLC23A2, TOR1A, GPX1, NDUFB4, TAT, IDH1, DHCR24, CYGB, RCAN1, NDUFS8, G6PDX, PPIF, AKT1, ND3, TLR4	1067	133	18082
GOTERM_BP_DIRECT	GO:0007623	circadian rhythm	13	1.06122	0.0252179	NTRK2, DDX5, NONO, MTTP, IGF1, PER3, UBB, MAT2A, NOCT, NAMPT, BHLHE40, ATF5, LGR4	1067	108	18082
GOTERM_BP_DIRECT	GO:0006099	tricarboxylic acid cycle	6	0.489796	0.0257131	IDH1, OGDH, ACO2, PDHB, CSL, IDH3A	1067	29	18082
GOTERM_BP_DIRECT	GO:0046034	ATP metabolic process	7	0.571429	0.0285205	FIGNL1, ATP5D, ATP5K, ATP5H, ATP5O, ATP1B1, ATP5G1	1067	40	18082
GOTERM_BP_DIRECT	GO:0030279	negative regulation of ossification	5	0.408163	0.0321798	TGFB1, CHSY1, ENPP1, ADRB2, HIF1A	1067	21	18082
GOTERM_BP_DIRECT	GO:0051726	regulation of cell cycle	13	1.06122	0.0323285	2810417H13RIK, CDKN1A, GADD45A, ADARB1, DICER1, CCND3, SON, CCND2, CCND1, CCNE1, FIGNL1, SGK1, ATF5	1067	112	18082
GOTERM_BP_DIRECT	GO:0002028	regulation of sodium ion transport	5	0.408163	0.0375513	TGFB1, SIK1, ADRB2, NOS1, YWHAH	1067	22	18082
GOTERM_BP_DIRECT	GO:0006457	protein folding	14	1.14286	0.0388247	CCT2, PPIL1, HSP90AA1, HSPA4L, P3H1, TXN2, ERO1L, DNAJA1, DNAJB1, CANX, TCP1, PPIF, CALR, FKBP4	1067	128	18082
GOTERM_BP_DIRECT	GO:0046777	protein autophosphorylation	18	1.46939	0.0425419	LYN, NTRK2, CSNK1G3, DAPK1, EIF2AK2, PRKX, PRKCA, MAPKAPK3, ERBB4, MKNK1, TRIM24, ULK1, SIK1, PIM3, TNIK, MAP3K13, CSNK1G2, JAK1	1067	183	18082

## Sheet: Sheet 3
Category	Term_1	Term	Count	%	PValue	Genes	List.Total	Pop.Hits	Pop.Total
GOTERM_BP_DIRECT	GO:0008152	metabolic process	74	5.58491	2.14e-13	ALDH1L1, ACAA2, ACSM3, ECI2, ACSM5, LCLAT1, FTCD, GYS2, 6430573F11RIK, NADK2, AUH, ACADL, DBT, ENPP2, UGT2A3, HMGCS2, ENPP3, ACADM, ACAD11, TKTL2, PDHX, ARSA, ACSL1, GAA, PGAM1, HOGA1, ALDH3A2, HADHB, UGDH, ACOX2, BDH1, MTHFD1, ALDH1A1, UGT2B5, DXO, UMPS, FBP1, SLC27A2, ASPA, ALDH7A1, GART, SLC27A5, GCDH, H6PD, ACAA1B, GNS, TYMP, PAPSS1, NEU3, UGP2, GPAT4, UGT3A1, METTL7B, XRCC6, CENPV, FAHD1, PK…	1134	463	18082
GOTERM_BP_DIRECT	GO:0006629	lipid metabolic process	64	4.83019	3.31e-09	ACAA2, ACSM3, GDE1, ACSM5, CROT, LCLAT1, PRKAG3, ACADL, CYP4V3, ENPP2, FDXR, HMGCS2, ACADM, HADH, SREBF1, CPT1A, IAH1, PCYT1A, ACSL1, ELOVL3, HADHB, ACOX2, SOAT2, ANGPTL8, PPARA, SLC27A2, SLC27A5, PLBD2, PLIN5, HSD17B4, ACAA1B, HSD17B6, OMA1, SGMS2, HACD3, HSD17B11, 4932438A13RIK, MTM1, HSD11B1, NEU3, UGCG, HMGCL, FAM213B, GPAT4, HACL1, CEPT1, PRLH, KDSR, PLCG1, DECR1, MBTPS1, CHKA, PNPLA8, EPHX2…	1134	459	18082
GOTERM_BP_DIRECT	GO:0032922	circadian regulation of gene expression	16	1.20755	3.78e-06	NGFR, HDAC2, HDAC3, HDAC1, BHLHE41, RORC, CREM, CSNK1D, NR1D1, SIRT1, RBM4, MYBBP1A, ID2, CRY2, PPARA, CLOCK	1134	61	18082
GOTERM_BP_DIRECT	GO:0006631	fatty acid metabolic process	27	2.03774	4.34e-06	ACAA2, ACSM3, CREM, HSD17B4, ACAA1B, ACSM5, CROT, HACD3, PRKAG3, GHR, FAM213B, ACADL, GPAT4, ACADM, HADH, DECR1, CYB5A, CPT1A, ACSL1, PNPLA8, ELOVL3, MCAT, HADHB, ACOX2, PPARA, SLC27A2, SLC27A5	1134	156	18082
GOTERM_BP_DIRECT	GO:0043401	steroid hormone mediated signaling pathway	14	1.0566	1.71e-05	THRA, NR1I3, NR1I2, RORC, NR1H4, NR1D1, RORB, NR0B2, BMP4, NR6A1, NR5A2, RARA, PPARG, PPARA	1134	53	18082
GOTERM_BP_DIRECT	GO:0006749	glutathione metabolic process	13	0.981132	3.66e-05	GSTM4, GGT6, GPX4, GLO1, GSR, SOD1, GSTZ1, GCLC, NAT8, GSTA4, GSTA2, ETHE1, CTH	1134	49	18082
GOTERM_BP_DIRECT	GO:0006914	autophagy	23	1.73585	7.28e-05	ATG3, ARSA, RAB1A, GABARAPL1, USP10, EI24, VPS13A, WIPI2, ATG14, WDR45, VMP1, TMEM59, MAP1LC3B, EVA1A, STBD1, VPS41, ZKSCAN3, ANXA7, TMBIM6, DRAM2, TBC1D17, SQSTM1, OPTN	1134	142	18082
GOTERM_BP_DIRECT	GO:0048511	rhythmic process	21	1.58491	0.000135	NGFR, KDM5B, HDAC2, HDAC1, BHLHE41, RORC, CREM, CSNK1D, NR1D1, RORB, SIRT1, GRIN1, KAT2B, MYBBP1A, NFIL3, TEF, ID2, CRY2, PPARG, PPARA, CLOCK	1134	128	18082
GOTERM_BP_DIRECT	GO:0016567	protein ubiquitination	42	3.16981	0.000175	UBE2CBP, CUL5, WDSUB1, PELI2, DCAF8, NEDD4L, DTX4, FBXO21, BACH1, DCAF7, TMEM189, ZNRF2, ZNRF3, HECTD1, OS9, TRIM2, ARIH2, SKP1A, RNF111, FBXO9, BRAP, ATG3, RNF43, WSB1, TRIM41, SMURF1, FANCL, NSMCE2, FBXO15, KLHL2, SIRT1, PJA2, MIB1, KLHL9, KBTBD3, ZC3HC1, UBOX5, RNF128, NEURL2, MED21, RFWD3, ASB6	1134	362	18082
GOTERM_BP_DIRECT	GO:0006325	chromatin organization	11	0.830189	0.000314	MORF4L1, HDAC2, ING3, HDAC3, LAS1L, GPX4, HDAC1, EHMT1, NUCKS1, SMARCA2, SIRT1	1134	44	18082
GOTERM_BP_DIRECT	GO:0007040	lysosome organization	10	0.754717	0.000552	MBTPS1, FAM160A2, HOOK2, HOOK1, AKTIP, GAA, ZKSCAN3, TMEM106B, CLN5, CHMP5	1134	39	18082
GOTERM_BP_DIRECT	GO:0051289	protein homotetramerization	14	1.0566	0.000627	HPRT, HSD17B10, CRYZ, ACADL, CTH, PPAT, CAT, ALDH1A1, ACADM, TK1, FBP1, DCTPP1, MBL1, DECR1	1134	74	18082
GOTERM_BP_DIRECT	GO:0046686	response to cadmium ion	8	0.603774	0.00171597	CYB5A, GCLC, DTYMK, GSS, HAAO, CAT, SORD, NUDT1	1134	29	18082
GOTERM_BP_DIRECT	GO:0005978	glycogen biosynthetic process	6	0.45283	0.00233644	GYS2, PPP1R3C, AGL, ACADM, NR1D1, PRKAG3	1134	16	18082
GOTERM_BP_DIRECT	GO:0031639	plasminogen activation	5	0.377358	0.00237241	FGB, FGA, FGG, F11, KLKB1	1134	10	18082
GOTERM_BP_DIRECT	GO:0008333	endosome to lysosome transport	9	0.679245	0.00249726	FAM160A2, HOOK2, MGRN1, HOOK1, AKTIP, VPS41, ATG14, MTM1, CHMP5	1134	39	18082
GOTERM_BP_DIRECT	GO:0006730	one-carbon metabolic process	8	0.603774	0.00259097	DHFR, CAR3, GM4737, ALDH1L1, AHCY, MTHFD1, CAR8, CAR6	1134	31	18082
GOTERM_BP_DIRECT	GO:0015908	fatty acid transport	6	0.45283	0.00412717	SLC25A17, ACSL1, CROT, SLC27A2, SLC27A5, MFSD2A	1134	18	18082
GOTERM_BP_DIRECT	GO:0000288	nuclear-transcribed mRNA catabolic process, deadenylation-dependent decay	5	0.377358	0.00505493	ZFP36, CNOT6L, AUH, ZFP36L2, ZFP36L1	1134	12	18082
GOTERM_BP_DIRECT	GO:0006810	transport	141	10.6415	0.00588326	STEAP3, PGAP1, AQP8, AQP9, PHAX, TOMM20, SLC4A4, PEX26, RABGEF1, COL4A3BP, IPO8, SLCO2B1, SCN9A, FDXR, SLC16A7, SLC39A8, SLC26A11, MFSD2A, ATG3, CADPS2, SLC15A1, CPT1A, COG7, TRAPPC2L, ABCA8B, MMGT1, SLC30A5, COG4, ATP11C, SLC30A1, SCAMP1, SLC5A6, DOPEY2, SCNN1A, VDAC1, ATP6V0D1, CHRNA1, ABCB6, STXBP3, SLC1A2, SLC30A10, OAZ1, SLC5A3, MTM1, TIMM50, SEC14L2, ORC4, SLCO1B2, SARAF, ATP6V1H, KCNN2, SL…	1134	1822	18082
GOTERM_BP_DIRECT	GO:0045921	positive regulation of exocytosis	7	0.528302	0.00683396	FGB, UNC13B, CADPS2, FGA, FGG, CADPS, SYTL4	1134	28	18082
GOTERM_BP_DIRECT	GO:0042493	response to drug	34	2.56604	0.00792118	COL18A1, HDAC2, FECH, MAOB, EI24, SLC1A2, AK4, CROT, ATP1A1, PPOX, COMT, SERPINA7, HSPD1, DNMT3B, HADH, MAP2K6, DGCR2, SREBF1, USP47, CPT1A, ABCC2, ACSL1, XRCC5, BDNF, DNMT3A, SORD, INHBA, AKR1C6, SOD1, CYP2D26, RPS6KB1, CAT, ALDH1A1, PPARG	1134	339	18082
GOTERM_BP_DIRECT	GO:0042752	regulation of circadian rhythm	9	0.679245	0.0149176	KDM5B, ID2, CRY2, CREM, PPARG, CSNK1D, NR1D1, RORB, PPARA	1134	52	18082
GOTERM_BP_DIRECT	GO:0001975	response to amphetamine	7	0.528302	0.0177354	PPP3CA, HDAC2, HDAC1, PPP1R1B, HPRT, GRIN1, SOD1	1134	34	18082
GOTERM_BP_DIRECT	GO:0035023	regulation of Rho protein signal transduction	11	0.830189	0.0215675	PLEKHG3, NET1, ALS2CL, FGD6, ARHGEF26, PLEKHG5, PLEKHG6, ARHGEF16, ARHGEF10L, EPS8L2, NGEF	1134	77	18082
GOTERM_BP_DIRECT	GO:0016310	phosphorylation	52	3.92453	0.0225527	MYLK, NADK2, RPS6KA1, PDK4, PIP4K2C, TK1, SEPHS1, XYLB, MAP3K5, PDK1, MAP2K3, CSNK2A2, NME2, CASK, CSNK1D, TNNI3K, ZAP70, PRKD3, SHPK, FAM20C, DTYMK, PDXK, AK2, AK4, SGMS2, PAPSS1, ERBB3, GRK5, MKNK2, MAP2K6, CDK18, CDK19, NEK4, PKLR, GK, CHKA, RYK, TPK1, GLYCTK, INSR, EIF2AK1, MAPK15, HIPK3, ACVR2A, UCK2, MAP3K15, CDK6, RPS6KB1, ETNK2, TAOK2, PI4KA, ADCK5	1134	612	18082
GOTERM_BP_DIRECT	GO:0030855	epithelial cell differentiation	10	0.754717	0.0233492	CPT1A, NR5A2, TST, CES1D, CASP6, ANXA7, PPARG, VDAC1, STX2, CNN3	1134	67	18082
GOTERM_BP_DIRECT	GO:0007029	endoplasmic reticulum organization	6	0.45283	0.0243872	VMP1, COL4A3BP, ATL3, ATL1, TOR1AIP2, USE1	1134	27	18082
GOTERM_BP_DIRECT	GO:0030308	negative regulation of cell growth	15	1.13208	0.0247397	BMP10, SMAD3, SERPINE2, EI24, CIRBP, FOXK1, INHBA, SMARCA2, SIRT1, AGT, ZC3H12D, ADAM15, CTH, PPARG, FBP1	1134	125	18082
GOTERM_BP_DIRECT	GO:0009611	response to wounding	9	0.679245	0.0273894	NGFR, ZFP36, SERPINE2, RPS6KB1, PLLP, SLC1A2, LCP1, ZFP36L2, ZFP36L1	1134	58	18082
GOTERM_BP_DIRECT	GO:0006801	superoxide metabolic process	5	0.377358	0.0279051	NQO1, IMMP2L, CBS, NOX4, SOD1	1134	19	18082
GOTERM_BP_DIRECT	GO:0070527	platelet aggregation	7	0.528302	0.0294834	FGB, FGA, FIBP, STXBP3, FGG, HSPB1, VCL	1134	38	18082
GOTERM_BP_DIRECT	GO:0006915	apoptotic process	48	3.62264	0.032348	KANK2, STEAP3, RBM25, PHLPP1, EI24, JADE1, XIAP, ZFP36L1, CASP14, AIFM3, EVA1A, OPA1, GRK5, CASP6, ZFP385B, FAM162A, C1QBP, MKNK2, RASSF6, DRAM2, RNF130, RNF152, MAP2K6, HTATIP2, MAP3K5, BCAP31, WWOX, NGFR, KLF11, CADM1, SIVA1, AKTIP, BNIP3, CSNK2A2, RASSF7, G0S2, SIRT1, HIPK3, AIMP2, RABEP1, RPS6KB1, NOA1, PDCD4, TMBIM6, ELMO3, VDAC1, SQSTM1, YPEL3	1134	570	18082
GOTERM_BP_DIRECT	GO:0009409	response to cold	7	0.528302	0.0369101	RBM3, ACADL, THRA, PPARG, ACADM, AGT, HSPD1	1134	40	18082
GOTERM_BP_DIRECT	GO:0052696	flavonoid glucuronidation	5	0.377358	0.0390386	UGT2B36, UGT2B35, UGT2B5, UGT2A3, UGT3A1	1134	21	18082
GOTERM_BP_DIRECT	GO:0055088	lipid homeostasis	7	0.528302	0.0410333	GCDH, COL4A3BP, ACADL, ACOX2, ACADM, ACAD11, USF2	1134	41	18082
GOTERM_BP_DIRECT	GO:0043524	negative regulation of neuron apoptotic process	17	1.28302	0.0433432	NGFR, LRP1, BDNF, HDAC1, XIAP, SIRT1, AGT, SOD1, HSPD1, GRIN1, NRBP2, PRDX2, GCLC, ERBB3, ADNP, OPTN, CPEB4	1134	160	18082

## Sheet: Sheet 4
Category	Term_1	Term	Count	%	PValue	Genes	List.Total	Pop.Hits	Pop.Total
GOTERM_BP_DIRECT	GO:0009615	response to virus	7	4.29448	4.24e-05	ACTA2, MX2, DHX58, ADAR, IFIT1, OASL1, TLR3	138	84	18082
GOTERM_BP_DIRECT	GO:0035458	cellular response to interferon-beta	5	3.06748	0.000257	PNPT1, IGTP, IRGM1, IFIT1, TLR3	138	41	18082
GOTERM_BP_DIRECT	GO:0006629	lipid metabolic process	10	6.13497	0.00831594	NCEH1, PNPLA8, CYP4V3, ACADM, HSD17B6, DDHD1, HSD17B11, SULT4A1, AKR1C6, PPARD	138	459	18082
GOTERM_BP_DIRECT	GO:0002376	immune system process	9	5.52147	0.00883421	CR2, MX2, DHX58, IRGM1, ADAR, IFIT1, C8B, OASL1, TLR3	138	383	18082
GOTERM_BP_DIRECT	GO:0043066	negative regulation of apoptotic process	10	6.13497	0.028449	BNIP3L, ZFAND6, ADAR, BIRC6, PIM3, SGK1, FOXO1, LIMS2, MTDH, PPARD	138	566	18082

## Sheet: Sheet 5
Category	Term_1	Term	Count	%	PValue	Genes	List.Total	Pop.Hits	Pop.Total
GOTERM_BP_DIRECT	GO:0006629	lipid metabolic process	28	7.79944	1.7e-08	INSIG2, AKR1D1, MSMO1, HMGCR, HSD17B7, ACNAT2, CYP7A1, ACNAT1, 4932438A13RIK, AACS, FADS2, NSDHL, SGPL1, ALOXE3, DGAT2, PCYT1A, GPX1, CHKA, PNPLA7, ELOVL3, ELOVL6, BAAT, CYP39A1, SULT1D1, CES1D, ACOX2, THRSP, LPIN1	304	459	18082
GOTERM_BP_DIRECT	GO:0030097	hemopoiesis	9	2.50696	9.69e-05	FLCN, SGPL1, TTC7, CDK6, HBB-B1, CRIP2, HBB-BT, HBB-BS, CDK13	304	86	18082
GOTERM_BP_DIRECT	GO:0006695	cholesterol biosynthetic process	6	1.67131	0.000178	IDI1, NSDHL, CES1D, INSIG2, HMGCR, HSD17B7	304	32	18082
GOTERM_BP_DIRECT	GO:0006631	fatty acid metabolic process	11	3.06407	0.000306	FADS2, SGPL1, ACOX2, ELOVL3, CREM, ELOVL6, ACNAT2, BAAT, ACNAT1, ALOXE3, AACS	304	156	18082
GOTERM_BP_DIRECT	GO:0090090	negative regulation of canonical Wnt signaling pathway	7	1.94986	0.00740709	MAD2L2, CYLD, WNT5B, FZD6, RAPGEF1, MAPK14, AES	304	102	18082
GOTERM_BP_DIRECT	GO:0006749	glutathione metabolic process	5	1.39276	0.00906077	GPX1, NAT8, TXNRD3, GLO1, GSTT3	304	49	18082
GOTERM_BP_DIRECT	GO:0007623	circadian rhythm	7	1.94986	0.00969144	KLF10, NAMPT, BHLHE40, BHLHE41, CREM, ATF5, CLOCK	304	108	18082
GOTERM_BP_DIRECT	GO:0045444	fat cell differentiation	6	1.67131	0.0105048	GPX1, GRK5, LPIN1, ATF5, ALOXE3, 4932438A13RIK	304	79	18082
GOTERM_BP_DIRECT	GO:0048511	rhythmic process	7	1.94986	0.020884	KLF10, NAMPT, BHLHE40, BHLHE41, CREM, HNRNPD, CLOCK	304	128	18082
GOTERM_BP_DIRECT	GO:0005975	carbohydrate metabolic process	9	2.50696	0.023097	PPP1R3C, PPP1R3B, GLO1, HHIPL2, PDK4, PGK1, PDHB, XYLB, GCK	304	206	18082
GOTERM_BP_DIRECT	GO:0006006	glucose metabolic process	5	1.39276	0.027249	CREM, PDK4, PDHB, MAPK14, GCK	304	68	18082
GOTERM_BP_DIRECT	GO:0007179	transforming growth factor beta receptor signaling pathway	5	1.39276	0.0371815	CLDN5, PTPRK, MTMR4, SKIL, SMAD5	304	75	18082

## Sheet: Sheet 6
Category	Term_1	Term	Count	%	PValue	Genes	List.Total	Pop.Hits	Pop.Total
GOTERM_BP_DIRECT	GO:0035458	cellular response to interferon-beta	6	3.46821	2.31e-05	GBP6, IRGM2, IFI47, GM4841, TLR3, IFIT3	153	41	18082
GOTERM_BP_DIRECT	GO:0051607	defense response to virus	8	4.62428	0.000533	SLFN8, ITCH, DDX58, MX2, IFIT3B, DDX60, TLR3, IFIT3	153	167	18082
GOTERM_BP_DIRECT	GO:0002376	immune system process	9	5.20231	0.0158142	ITCH, CR1L, DDX58, MX2, ERAP1, AKAP8, TLR3, IFIT3, HERC6	153	383	18082
GOTERM_BP_DIRECT	GO:0008380	RNA splicing	7	4.04624	0.0163184	LSM10, SON, ZRANB2, DDX39B, KHSRP, SNRNP27, TARDBP	153	241	18082
GOTERM_BP_DIRECT	GO:0043066	negative regulation of apoptotic process	11	6.35838	0.0214151	BMP4, USP47, PIDD1, ITCH, CDKN1A, SON, NR4A3, GRK5, DUSP1, GATA6, IFIT3	153	566	18082
GOTERM_BP_DIRECT	GO:0008152	metabolic process	9	5.20231	0.0420681	NADK2, UGP2, AUH, GSTA4, GPAT4, GSTA2, PAH, ACAA1B, PRDX6	153	463	18082

## Sheet: Sheet 7
Category	Term_1	Term	Count	%	PValue	Genes	List.Total	Pop.Hits	Pop.Total
GOTERM_BP_DIRECT	GO:0007623	circadian rhythm	13	3.8806	1.3e-07	SREBF1, BDNF, HDAC1, NONO, RORC, NR1D1, SIRT1, PER2, PER3, DBP, CRY2, KLF9, BHLHE40	285	108	18082
GOTERM_BP_DIRECT	GO:0048511	rhythmic process	12	3.58209	5.66e-06	DBP, PER3, HDAC1, NONO, CRY2, KLF9, BHLHE40, RORC, NR1D2, AHR, NR1D1, SIRT1	285	128	18082
GOTERM_BP_DIRECT	GO:0006629	lipid metabolic process	22	6.56716	1.28e-05	SREBF1, ACSL1, MID1IP1, ELOVL2, SRD5A3, ELOVL3, DDHD2, LPL, H2-KE6, CROT, PRKAB1, AGPAT2, LSS, NEU2, PLA2G16, FADS2, THRSP, HACL1, CEPT1, APOE, PCK1, PLPP1	285	459	18082
GOTERM_BP_DIRECT	GO:0009749	response to glucose	8	2.38806	0.000223	SMAD2, GYS2, SREBF1, COL4A3, LPL, SLC37A4, NR0B2, KHK	285	78	18082
GOTERM_BP_DIRECT	GO:0007015	actin filament organization	8	2.38806	0.000328	TMSB15L, TMSB15B2, MYO1B, TMSB15B1, ACTN1, SORBS2, SORBS1, ACTR3B	285	83	18082
GOTERM_BP_DIRECT	GO:0001889	liver development	8	2.38806	0.000745	DBP, CADM1, CCND1, SLCO2B1, FPGS, NF1, AHR, CFC1	285	95	18082
GOTERM_BP_DIRECT	GO:0006915	apoptotic process	20	5.97015	0.00173187	PLK3, CADM1, UBE2D3, TRPV2, SIRT1, HIPK3, HCAR2, RNF144B, CASP7, BCL2L11, TRAF4, EVA1A, TRAF3, MKNK2, TNFSF10, CIAPIN1, DRAM2, RFFL, SQSTM1, YPEL3	285	570	18082
GOTERM_BP_DIRECT	GO:0000122	negative regulation of transcription from RNA polymerase II promoter	22	6.56716	0.00572669	SREBF1, PLK3, HDAC1, EPAS1, HFE2, AHR, NR1D1, NR0B2, SIRT1, HIPK3, FOXP1, GATAD2A, PER2, PER3, CCND1, CNOT1, CRY2, BHLHE40, ERF, MXD1, SQSTM1, RCOR1	285	729	18082
GOTERM_BP_DIRECT	GO:0006633	fatty acid biosynthetic process	6	1.79104	0.00615192	FADS2, ELOVL2, ELOVL3, LPL, H2-KE6, PRKAB1	285	74	18082
GOTERM_BP_DIRECT	GO:0042752	regulation of circadian rhythm	5	1.49254	0.00893121	PER2, NONO, CRY2, NR1D2, NR1D1	285	52	18082
GOTERM_BP_DIRECT	GO:0042632	cholesterol homeostasis	5	1.49254	0.0171975	PLA2G12B, LPL, APOE, SLC37A4, SIRT1	285	63	18082
GOTERM_BP_DIRECT	GO:0007568	aging	8	2.38806	0.0196713	SREBF1, CASP7, GCLC, VCAM1, APOE, TNFRSF1B, PCK1, EEF2	285	173	18082
GOTERM_BP_DIRECT	GO:0006810	transport	40	11.9403	0.0286184	TSG101, SLC26A1, PGAP1, SLC20A1, ABCB4, RASL2-9, CROT, ATP1A1, SLC1A5, TIMM10, ABCB11, SNX30, TRAM2, AP2A2, CYGB, PEX26, SEC14L2, FADS2, SLCO2B1, SLC26A11, APOE, DIRC2, RAB6A, SLC25A44, ATP6V1C1, GET4, TMEM30B, TRPV2, SORBS1, YIF1A, SLC5A6, PARP11, TOM1L2, HOOK1, PLEKHM1, SLC25A30, AQP11, SRSF3, SLC25A53, ATP6V0C	285	1822	18082

## Sheet: Sheet 8
ID	Presence of rhythmicity (p-value) for CON	Presence of rhythmicity (p-value) for T3	CON mesor estimate	T3 mesor estimate	Mesor difference estimate	P-value for mesor difference	CON amplitude estimate	T3 amplitude estimate	Amplitude difference estimate	P-value for amplitude difference	CON peak time hours	T3 peak time hours	Phase difference estimate	P-value for difference in phase	Shared period estimate	Change for Amplitude	Change for Phase	Change for Mesor
Carbohydrate metabolism	1.26479e-07	0.0699968	-5.58876e-07	-1.03545	-1.03545	2.51766e-18	0.560084	0.123378	-0.436707	5.44589e-05	19.5261	19.8442	0.318077	0.883929	24	DOWN	NO CHANGE	DOWN
FA metabolism / catabolism	0.0640713	0.039033	1.21747e-07	-0.889951	-0.889951	4.34568e-16	0.113236	0.180974	0.0677381	0.499118	21.9391	10.1424	-11.7967	9.67486e-05	24	NO CHANGE	NO CHANGE	DOWN
FA metabolism / LC FA	2.81088e-07	0.0482816	-1.34463e-06	0.509964	0.509965	3.55278e-11	0.3906	0.130917	-0.259683	0.00269167	20.8375	20.6452	-0.192327	0.912611	24	DOWN	NO CHANGE	UP
Cholesterol homeostasis	2.40347e-07	5.05863e-05	-6.29451e-07	1.04788	1.04788	9.27581e-27	0.306259	0.217779	-0.0884806	0.141358	11.3265	9.94394	-1.38257	0.122699	24	NO CHANGE	NO CHANGE	UP
Immune system	0.0594177	0.00401184	0.0048227	0.714461	0.709638	2.68164e-15	0.113799	0.192818	0.0790192	0.342819	7.67287	20.0157	-11.6572	5.64129e-06	24	NO CHANGE	NO CHANGE	UP
Liver TAG	0.00132595	0.000845487	6.13458	12.3108	6.17625	0.00110009	2.50541	9.32887	6.82346	0.00902636	5.47796	7.79586	2.3179	0.409422	24	UP	NO CHANGE	UP
Liver Cholesterol	0.0056488	0.00203383	2.34307	2.35579	0.0127208	0.871786	0.201373	0.309241	0.107868	0.331377	9.22267	8.8406	-0.38207	0.833346	24	NO CHANGE	NO CHANGE	NO CHANGE
Serum Cholesterol	0.117379	0.00138624	236.134	124.6	-111.534	7.10583e-10	29.9101	30.4682	0.558034	0.977866	14.4183	4.2984	-10.1199	0.000168739	24	NO CHANGE	NO CHANGE	DOWN
